# Supplementary material
Source: PubMed Central journal article supplement (PMC419842)
Supplement: plntphys_134_4_1683__1.pdf [file plntphys_134_4_1683__1.pdf]

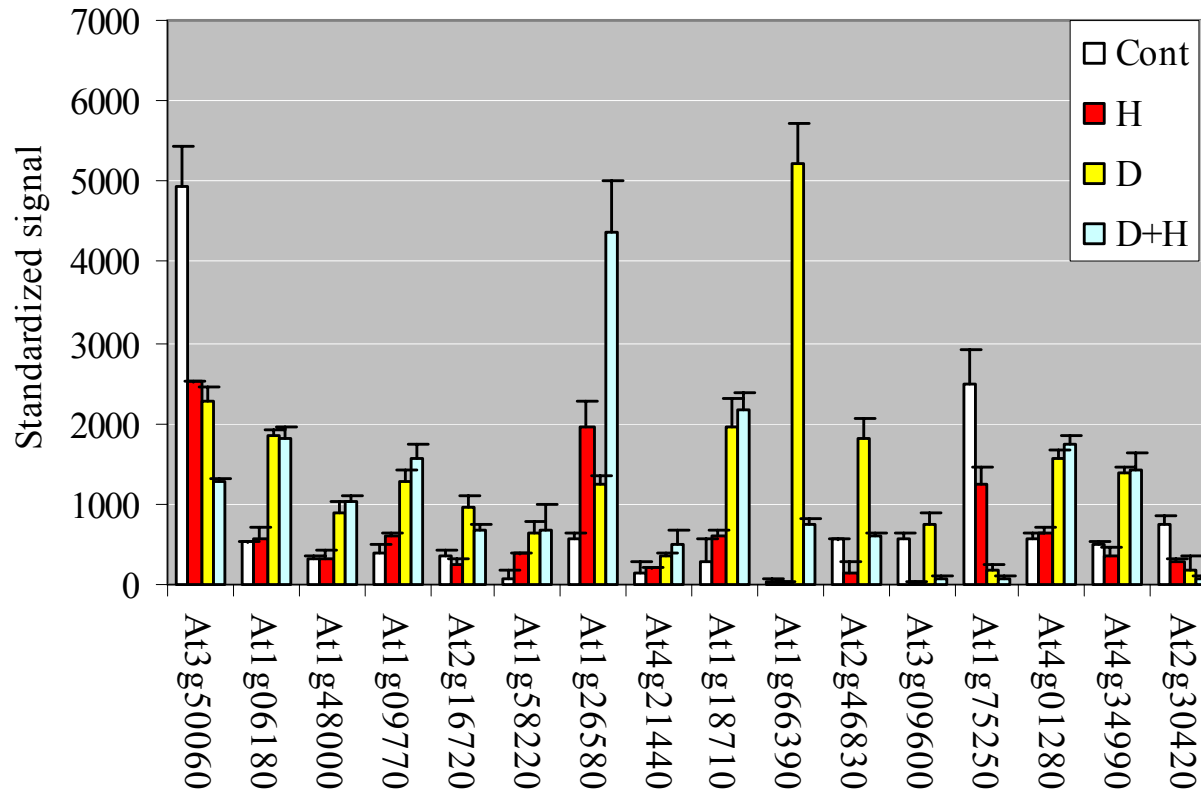

**Supplementary Fig. 1.** Expression level of all *Arabidopsis* MYB transcription factors altered during drought stress, heat shock or a combination of drought stress and heat shock. RNA isolation and Affymetrix chip analysis were performed as described in Experimental Procedures. Cont, control; D, drought stress; H, heat shock; D+H, a combination of drought stress and heat shock.

**Table 1: Transcripts elevated during a combination of drought and heat shock compared to control unstressed plants**

|                                                                                                                                                                                                                                                                                       | Affymetrix number | log <sub>2</sub> fold increase |
|---------------------------------------------------------------------------------------------------------------------------------------------------------------------------------------------------------------------------------------------------------------------------------------|-------------------|--------------------------------|
| heat shock protein 18 ; supported by full-length cDNA: Ceres:97197.                                                                                                                                                                                                                   | 247691_at         | 10.7                           |
| heat shock protein 17.6A                                                                                                                                                                                                                                                              | 250351_at         | 10.4                           |
| heat shock protein 21                                                                                                                                                                                                                                                                 | 253884_at         | 9.4                            |
| Arabidopsis mitochondrion-localized small heat shock protein (AtHSP23.6-mito) ; supported by cDNA: gi_15293004_gb_AY050936.1                                                                                                                                                          | 254059_at         | 9.3                            |
| heat shock protein 17.6-II ; supported by full-length cDNA: Ceres:2281.                                                                                                                                                                                                               | 250296_at         | 9.3                            |
| late embryogenesis abundant protein LEA like ; supported by cDNA: gi_15293004_gb_AY050936.1                                                                                                                                                                                           | 250648_at         | 8.9                            |
| putative metal-binding protein highly similar to GB:AAD09511; supported by cDNA: gi_15450582_gb_AY052659.1                                                                                                                                                                            | 264729_at         | 8.8                            |
| heat shock protein 17 ; supported by cDNA: gi_15294149_gb_AF410266.1_AF410266                                                                                                                                                                                                         | 252515_at         | 8.4                            |
| nonspecific lipid-transfer protein precursor - like nonspecific lipid-transfer protein precursor, Brassica napus, EMBL:AF101038; supported by fi 17.6 kDa heat shock protein (AA 1-156) identical to GI:4376161 from (Arabidopsis thaliana) (Nucleic Acids Res. 17 (19), 7995 (1989)) | 247718_at         | 8                              |
| unknown protein similar to pollen coat protein GB:CAA63531 from [Brassica oleracea]; supported by cDNA: gi_14335127_gb_AY037243.1                                                                                                                                                     | 260978_at         | 7.7                            |
| senescence-associated protein (SAG29) ; supported by full-length cDNA: Ceres:38843.                                                                                                                                                                                                   | 258498_at         | 7.7                            |
| heat shock protein, putative similar to heat shock protein GI:19617 from [Medicago sativa]; supported by full-length cDNA: Ceres:32795.                                                                                                                                               | 245982_at         | 7.6                            |
| hypothetical protein                                                                                                                                                                                                                                                                  | 262911_s_at       | 7.3                            |
| chloroplast-localized small heat shock protein, putative similar to chloroplast-localized small heat shock protein GI:6601536 from [Funaria hyg                                                                                                                                       | 244931_at         | 7.2                            |
| heat shock protein 22.0 ; supported by cDNA: gi_511795_gb_U11501.1_ATU11501                                                                                                                                                                                                           | 262148_at         | 7.1                            |
| mitochondrial heat shock 22 kd protein-like ; supported by full-length cDNA: Ceres: 268536.                                                                                                                                                                                           | 255811_at         | 6.7                            |
| putative major latex protein major latex protein type 1 - Arabidopsis thaliana, EMBL:X91960; supported by cDNA: gi_13605713_gb_AF36183                                                                                                                                                | 248434_at         | 6.7                            |
| putative protein similar to unknown protein (emb CAB62340.1); supported by full-length cDNA: Ceres:103870.                                                                                                                                                                            | 254234_at         | 6.6                            |
| putative small heat shock protein ; supported by full-length cDNA: Ceres:25828.                                                                                                                                                                                                       | 248505_at         | 6.5                            |
| putative ascorbate peroxidase strong similarity to ascorbate peroxidase GB:CAA56340                                                                                                                                                                                                   | 266294_at         | 6.4                            |
| nonspecific lipid-transfer protein precursor - like nonspecific lipid-transfer protein precursor, Brassica napus, EMBL:AF101038; supported by fi                                                                                                                                      | 258695_at         | 6.4                            |
| heat shock protein 70 identical to heat shock protein 70 GB:CAA05547 GI:3962377 [Arabidopsis thaliana]; supported by cDNA: gi_15809831                                                                                                                                                | 247717_at         | 6.4                            |
| SRG1-like protein Strong homology to SRG1 protein, a new member of the Fe(II)/ascorbate oxidase superfamily, Similar to SRG1 protein [Ar                                                                                                                                              | 256245_at         | 6.1                            |
| late embryogenesis-abundant protein, putative similar to late embryogenesis-abundant protein GI:17828 from [Brassica napus]; supported by                                                                                                                                             | 262482_at         | 6                              |
| dehydrin RAB18-like protein (sp P30185) ; supported by cDNA: gi_16226664_gb_AF428458.1_AF428458                                                                                                                                                                                       | 262128_at         | 6                              |
| unknown protein EST gb ATTS0295 comes from this gene; supported by full-length cDNA: Ceres:20380.                                                                                                                                                                                     | 247095_at         | 5.8                            |
| putative phytochrome-associated protein 3 similar to GB:AAC99771; supported by cDNA: gi_3929585_gb_AF100166.1_AF100166                                                                                                                                                                | 264580_at         | 5.7                            |
| unknown protein ; supported by cDNA: gi_13265448_gb_AF324676.2_AF324676                                                                                                                                                                                                               | 264510_at         | 5.7                            |
| peptidylprolyl isomerase                                                                                                                                                                                                                                                              | 263881_at         | 5.7                            |
| unknown protein ; supported by cDNA: gi_15028356_gb_AY045981.1                                                                                                                                                                                                                        | 248657_at         | 5.7                            |
| hypothetical protein contains Pfam profile: PF01535 domain of unknown function (contains 3 copies)                                                                                                                                                                                    | 266462_at         | 5.5                            |
| hypothetical protein predicted by genscan; supported by cDNA: gi_15451109_gb_AY054635.1                                                                                                                                                                                               | 260062_at         | 5.4                            |
| putative NPK1-related MAP kinase similar to GB:BAA21855 from [Arabidopsis thaliana]                                                                                                                                                                                                   | 266098_at         | 5.3                            |
| heat shock protein DnaJ, putative similar to heat shock protein DnaJ GI:5020005 from [Rhodothermus marinus]                                                                                                                                                                           | 265216_at         | 5.3                            |
| putative protein predicted protein                                                                                                                                                                                                                                                    | 262307_at         | 5.3                            |
| elongation factor 1B alpha-subunit (emb CAB64729.1)                                                                                                                                                                                                                                   | 254823_at         | 5.3                            |
| heat shock protein 101 (HSP101) identical to heat shock protein 101 GI:6715468 GB:AAF26423 from [Arabidopsis thaliana]                                                                                                                                                                | 250304_at         | 5.3                            |
| unknown protein similar to At14a protein GB:AAD26355 GI:4589123 [Arabidopsis thaliana]; supported by cDNA: gi_16226582_gb_AF428437                                                                                                                                                    | 260248_at         | 5.2                            |
| putative protein                                                                                                                                                                                                                                                                      | 256603_at         | 5.2                            |
| protein phosphatase 2C - like ABA induced protein phosphatase 2C, Fagus sylvatica, EMBL:FSY277743; supported by cDNA: gi_15809791                                                                                                                                                     | 250624_at         | 5.1                            |
| serine protease-like protein serine protease OMI - Homo sapiens, EMBL:AF020760                                                                                                                                                                                                        | 247723_at         | 5.1                            |
| heat-shock protein ; supported by cDNA: gi_166769_gb_M62984.1_ATHHSP83                                                                                                                                                                                                                | 246733_at         | 5.1                            |
| mannan endo-1,4-beta-mannosidase                                                                                                                                                                                                                                                      | 248332_at         | 5                              |
| hypothetical protein predicted by genemark.hmm                                                                                                                                                                                                                                        | 247097_at         | 5                              |
| hypothetical protein                                                                                                                                                                                                                                                                  | 262268_at         | 5                              |
| putative protein CDPK substrate protein 1, Mesembryanthemum crystallinum, EMBL:AF219972; supported by full-length cDNA: Ceres:13378.                                                                                                                                                  | 265228_s_at       | 4.9                            |
| similar to 14KD proline-rich protein DC2.15 precursor (sp P14009); similar to ESTs emb Z17709 and emb Z47685 similar to hybrid proline-rich                                                                                                                                           | 246724_at         | 4.9                            |
| putative AVR9 elicitor response protein similar to GB:AAC69935; supported by cDNA: gi_14488077_gb_AF389287.1_AF389287                                                                                                                                                                 | 265111_at         | 4.8                            |
| ethylene-responsive transcriptional coactivator, putative similar to GB:AAD46402 from [Lycopersicon esculentum] (Plant J. 18 (6), 589-600 (1                                                                                                                                          | 264583_at         | 4.8                            |
| unknown protein ; supported by cDNA: gi_13605890_gb_AF367344.1_AF367344                                                                                                                                                                                                               | 258133_at         | 4.7                            |
| NADH dehydrogenase subunit 7                                                                                                                                                                                                                                                          | 250784_at         | 4.7                            |
| unknown protein ; supported by cDNA: gi_3883121_gb_AF082299.1_AF082299                                                                                                                                                                                                                | 244925_at         | 4.7                            |
| unknown protein identical to LEA-like protein GB:CAA10352 from [Arabidopsis thaliana]                                                                                                                                                                                                 | 264005_at         | 4.6                            |
| hypothetical protein                                                                                                                                                                                                                                                                  | 258347_at         | 4.6                            |
| receptor protein kinase like protein lectin receptor-like serine/threonine kinase lecRK1, Arabidopsis thaliana, PIR2:S68589                                                                                                                                                           | 254597_at         | 4.6                            |
| 1,4-alpha-glucan branching enzyme protein soform SBE2.2 precursor                                                                                                                                                                                                                     | 253819_at         | 4.6                            |
| heat shock transcription factor-like protein                                                                                                                                                                                                                                          | 250906_at         | 4.6                            |
| protein phosphatase 2C, putative similar to GB:CAB90633 from [Fagus sylvatica]; supported by full-length cDNA: Ceres:118185.                                                                                                                                                          | 249117_at         | 4.6                            |
| putative chloroplast protein import component similar to P. sativum Tic20 chloroplast protein import component, GenBank accession number                                                                                                                                              | 261077_at         | 4.5                            |
| putative protein various predicted proteins, Arabidopsis thaliana                                                                                                                                                                                                                     | 255430_at         | 4.5                            |
| maturase                                                                                                                                                                                                                                                                              | 253576_at         | 4.5                            |
| unknown protein ; supported by cDNA: gi_14532707_gb_AY039978.1                                                                                                                                                                                                                        | 244926_s_at       | 4.5                            |
| homeodomain transcription factor (ATHB-7) identical to SP:P46897; supported by cDNA: gi_15027938_gb_AY045826.1                                                                                                                                                                        | 267080_at         | 4.4                            |
| hypothetical protein                                                                                                                                                                                                                                                                  | 266327_at         | 4.4                            |
| methionine/cystathionine gamma lyase, putative similar to methionine gamma-lyase GB:CAA04124.1 GI:2330885 from [Trichomonas vaginal                                                                                                                                                   | 263504_s_at       | 4.4                            |
| Arm repeat containing protein - like arm repeat containing protein homolog, Arabidopsis thaliana, EMBL:AL133314                                                                                                                                                                       | 261957_at         | 4.4                            |
| putative protein predicted proteins, Arabidopsis thaliana                                                                                                                                                                                                                             | 251407_at         | 4.4                            |
| NADH dehydrogenase subunit 5 (nad5) (trans-splicing part 2 of 2)                                                                                                                                                                                                                      | 249624_at         | 4.4                            |
| hypothetical protein                                                                                                                                                                                                                                                                  | 257337_at         | 4.4                            |
| putative RNA-binding protein contains Pfam profile: PF00076 RNA recognition motif. (a.k.a. RRM, RBD, or RNP domain); similar to ras-GTP:                                                                                                                                              | 266014_s_at       | 4.3                            |
| hypothetical protein predicted by genemark.hmm; supported by full-length cDNA: Ceres: 144447.                                                                                                                                                                                         | 257817_at         | 4.3                            |
| NADH dehydrogenase subunit 9                                                                                                                                                                                                                                                          | 246582_at         | 4.3                            |
| hypothetical protein                                                                                                                                                                                                                                                                  | 244943_at         | 4.3                            |
| putative endochitinase                                                                                                                                                                                                                                                                | 266045_s_at       | 4.2                            |
| putative GTP-binding protein similar to GTP-binding protein GB:AAB53256 [Arabidopsis thaliana]                                                                                                                                                                                        | 260561_at         | 4.2                            |
| hypothetical protein predicted by genscan+                                                                                                                                                                                                                                            | 259913_at         | 4.2                            |
| putative protein intracellular protein Mg11, mouse, PIR:I49127; supported by cDNA: gi_14488068_gb_AF389282.1_AF389282                                                                                                                                                                 | 255891_at         | 4.2                            |
| 70kD heat shock protein ; supported by full-length cDNA: Ceres:98979.                                                                                                                                                                                                                 | 249403_at         | 4.2                            |
|                                                                                                                                                                                                                                                                                       | 265675_at         | 4.1                            |

|                                                                                                                                                |             |     |
|------------------------------------------------------------------------------------------------------------------------------------------------|-------------|-----|
| phytochrome E                                                                                                                                  | 254680_at   | 4.1 |
| low-temperature-induced 65 kD protein (sp)Q04980                                                                                               | 248352_at   | 4.1 |
| RuBisCO subunit binding-protein beta subunit precursor; chaperonin, 60 kDa                                                                     | 248021_at   | 4.1 |
| cytochrome c oxidase subunit 2                                                                                                                 | 244950_at   | 4.1 |
| putative transcriptional regulator similar to homeotic gene regulator (brahma protein); contains Pfam profile PF00176 SNF2 and others N-term   | 258559_at   | 4.1 |
| unknown protein                                                                                                                                | 262940_at   | 4   |
| hypothetical protein predicted by genemark.hmm                                                                                                 | 261065_at   | 4   |
| putative heat shock protein ;supported by full-length cDNA: Ceres:25528.                                                                       | 263374_at   | 3.9 |
| early light-induced protein identical to early light-induced protein GB:AAB88391 from [Arabidopsis thaliana];supported by full-length cDNA: Ce | 258321_at   | 3.9 |
| CTP synthase like protein CTP synthase, Methanococcus jannaschii,PIR2:E64446                                                                   | 254490_at   | 3.9 |
| hypothetical protein                                                                                                                           | 254414_at   | 3.9 |
| putative protein similar to unknown protein (pir  T03813)                                                                                      | 247293_at   | 3.9 |
| NADH dehydrogenase subunit 5 (nad5) (trans-splicing part 1 of 2)                                                                               | 257338_s_at | 3.9 |
| Expressed protein ; supported by cDNA: gi_14532529_gb_AY039889.1_                                                                              | 266550_s_at | 3.8 |
| hypothetical protein predicted by genemark.hmm                                                                                                 | 264217_at   | 3.8 |
| Myb-related transcription factor mixta, putative similar to Myb-related transcription factor mixta Gl:485866 from [Antirrhinum majus]          | 261431_at   | 3.8 |
| hypothetical protein predicted by genemark.hmm                                                                                                 | 259463_at   | 3.8 |
| hypothetical protein predicted by genefinder                                                                                                   | 258827_at   | 3.8 |
| unknown protein ; supported by cDNA: gi_13358195_gb_AF325003.2_AF325003                                                                        | 256114_at   | 3.8 |
| Expressed protein ; supported by full-length cDNA: Ceres:270232                                                                                | 254263_at   | 3.8 |
| putative protein Arabidopsis thaliana nap gene,PID:e1234813;supported by full-length cDNA: Ceres:38344.                                        | 253872_at   | 3.8 |
| putative protein similar to unknown protein (pir T05035)                                                                                       | 248959_at   | 3.8 |
| hypothetical protein                                                                                                                           | 257320_at   | 3.8 |
| potassium transporter, putative similar to potassium transporter Gl:2654088 from [Arabidopsis thaliana]                                        | 264338_at   | 3.7 |
| hypothetical protein                                                                                                                           | 263509_s_at | 3.7 |
| unknown protein ;supported by full-length cDNA: Ceres:96702.                                                                                   | 260357_at   | 3.7 |
| hypothetical protein predicted by genefinder, similar to seed maturation protein PM28 GB:AAD30427 from [Glycine max]                           | 257853_at   | 3.7 |
| DNA-binding protein - like DNA-binding protein R kappa B, Homo sapiens, PIR:S52863                                                             | 252546_at   | 3.7 |
| putative protein similar to unknown protein (gb AAC73025.1); supported by cDNA: gi_14532515_gb_AY039882.1_                                     | 250825_at   | 3.7 |
| DNA excision repair cross-complementing protein; similar to human Xeroderma pigmentosum group B DNA repair protein (gb AAC49987.1) ;           | 249307_s_at | 3.7 |
| receptor-like protein kinase                                                                                                                   | 247197_at   | 3.7 |
| hypothetical protein                                                                                                                           | 244901_at   | 3.7 |
| hypothetical protein predicted by genscan                                                                                                      | 266028_at   | 3.6 |
| unknown protein                                                                                                                                | 264483_at   | 3.6 |
| hypothetical protein contains similarity to lipid transfer protein Gl:498038 from (Senecio odorus)                                             | 264146_at   | 3.6 |
| unknown protein ;supported by full-length cDNA: Ceres:25894.                                                                                   | 264094_at   | 3.6 |
| hypothetical protein                                                                                                                           | 263502_s_at | 3.6 |
| putative galactinol synthase ;supported by full-length cDNA: Ceres:124236.                                                                     | 263320_at   | 3.6 |
| hypothetical protein predicted by genscan+                                                                                                     | 261857_at   | 3.6 |
| putative protein various predicted proteins, Arabidopsis thaliana                                                                              | 250955_at   | 3.6 |
| putative protein predicted proteins, Arabidopsis thaliana                                                                                      | 250036_at   | 3.6 |
| putative protein similar to unknown protein (gb AAD21732.1)                                                                                    | 249850_at   | 3.6 |
| unknown protein ;supported by full-length cDNA: Ceres:534.                                                                                     | 248218_at   | 3.6 |
| putative protein nonspecific lipid-transfer protein precursor, Brassica napus, EMBL:AF101038                                                   | 247713_at   | 3.6 |
| serine/threonine protein kinase-like protein several serine/threonine protein kinases - different species; supported by cDNA: gi_15215663_gb_  | 246922_at   | 3.6 |
| water stress-induced protein, putative similar to water stress-induced protein Gl:454879 from [Oryza sativa]; supported by cDNA: gi_1521576    | 245627_at   | 3.6 |
| NADH dehydrogenase subunit 6                                                                                                                   | 244953_s_at | 3.6 |
| cytochrome c oxidase subunit 1                                                                                                                 | 257333_at   | 3.6 |
| unknown protein ;supported by full-length cDNA: Ceres:100283.                                                                                  | 265907_at   | 3.5 |
| hypothetical protein similar to Anthocyanin 5-aromatic acyltransferase GB:BAA74428                                                             | 265091_s_at | 3.5 |
| hypothetical protein predicted by genemark.hmm                                                                                                 | 264562_at   | 3.5 |
| aldehyde dehydrogenase homolog, putative similar to aldehyde dehydrogenase homolog Gl:913941 from [Brassica napus]; supported by cDI           | 263157_at   | 3.5 |
| unknown protein predicted by genscan+, multiple est matches                                                                                    | 258935_at   | 3.5 |
| hypothetical protein predicted by genmark                                                                                                      | 258120_at   | 3.5 |
| hypothetical protein                                                                                                                           | 257759_at   | 3.5 |
| transcription factor-like protein ;supported by full-length cDNA: Ceres:114015.                                                                | 250688_at   | 3.5 |
| unknown protein ; supported by cDNA: gi_15451043_gb_AY054602.1_                                                                                | 248223_at   | 3.5 |
| serine/threonine kinase, putative similar to serine/threonine kinase Gl:2632252 from [Sorghum bicolor]; supported by cDNA: gi_14486385_gt      | 245775_at   | 3.5 |
| NADH dehydrogenase subunit 4L                                                                                                                  | 244902_at   | 3.5 |
| putative protein predicted proteins, Arabidopsis thaliana                                                                                      | 250359_at   | 3.5 |
| putative 3-phosphoinositide-dependent protein kinase-1 similar to 3-phosphoinositide-dependent protein kinase-1 GB:AAD37165 [Arabidopsis       | 258964_at   | 3.4 |
| hypothetical protein                                                                                                                           | 266044_s_at | 3.4 |
| putative glucosyltransferase                                                                                                                   | 265499_at   | 3.4 |
| flavin-containing monooxygenase, putative similar to flavin-containing monooxygenase GB:AAA21178 Gl:349534 from [Oryctolagus cuniculu          | 265119_at   | 3.4 |
| Myb-related transcription factor, putative similar to GB:AAF66727 from [Petunia x hybrida] (Plant Cell 11 (8), 1433-1444 (1999)); supported b  | 260140_at   | 3.4 |
| putative protein auxin-induced protein 10A -Glycine max,PID:g255579                                                                            | 254809_at   | 3.4 |
| glycine-rich cell wall protein-like glycine-rich protein 1.0 precursor, Phaseolus vulgaris, PIR1:S01821; supported by cDNA: gi_14030676_gb_    | 254667_at   | 3.4 |
| putative protein cellulose synthase catalytic subunit, Arabidopsis thaliana, gb:AF027173;supported by full-length cDNA: Ceres:112955.          | 254189_at   | 3.4 |
| lysine-ketoglutarate reductase/saccharopine ; supported by cDNA: gi_2052507                                                                    | 253373_at   | 3.4 |
| putative protein predicted protein, Arabidopsis thaliana                                                                                       | 253344_at   | 3.4 |
| low-molecular-weight heat shock protein - like cytosolic class I small heat-shock protein HSP17.5, Castanea sativa, EMBL:CSA9880               | 249575_at   | 3.4 |
| cytochrome c biogenesis orf203 Protein sequence is in conflict with the conceptual translation                                                 | 244919_at   | 3.4 |
| putative endochitinase                                                                                                                         | 260560_at   | 3.3 |
| putative protein various predicted proteins                                                                                                    | 252246_at   | 3.3 |
| putative protein hypothetical protein At2g37870 - Arabidopsis thaliana, EMBL:AC007661;supported by full-length cDNA: Ceres:5920.               | 251928_at   | 3.3 |
| DREB2A (dbj BAA33794.1) ; supported by cDNA: gi_3738229_dbj_AB007790.1_AB007790                                                                | 250781_at   | 3.3 |
| putative protein nucleoid DNA-binding protein cnd41, chloroplast, common tobacco, PIR:T01996; supported by cDNA: gi_15809849_gb_AY0            | 249626_at   | 3.3 |
| drought-induced protein like                                                                                                                   | 245523_at   | 3.3 |
| hypothetical protein predicted by genemark.hmm                                                                                                 | 245243_at   | 3.3 |
| hypothetical protein                                                                                                                           | 244954_s_at | 3.3 |
| putative N2,N2-dimethylguanosine tRNA methyltransferase similar to N2,N2-dimethylguanosine tRNA methyltransferase GB:CAA20101 Gl:6             | 259075_at   | 3.3 |
| putative protein several hypothetical proteins - Arabidopsis thaliana                                                                          | 252151_at   | 3.2 |
| aspartic protease, putative similar to aspartic protease Gl:1326164 from [Brassica napus]                                                      | 264741_at   | 3.2 |

|                                                                                                                                              |                                        |             |     |
|----------------------------------------------------------------------------------------------------------------------------------------------|----------------------------------------|-------------|-----|
| glucose-6-phosphate/phosphate-translocator precursor, putative similar to glucose-6-phosphate/phosphate-translocator precursor               | GI:299759                              | 264400_at   | 3.2 |
| unknown protein contains similarity to xenotropic and polytropic retrovirus receptor                                                         | GB:4759334                             | 262649_at   | 3.2 |
| branched-chain alpha keto-acid dehydrogenase, putative similar to branched-chain alpha keto-acid dehydrogenase                               | GB:AAC69851 GI:38222                   | 260900_s_at | 3.2 |
| hypothetical protein                                                                                                                         |                                        | 256384_at   | 3.2 |
| hypothetical protein predicted by genscan+                                                                                                   |                                        | 256285_at   | 3.2 |
| low-temperature-induced protein 78 (sp Q06738) ; supported by cDNA: gi_348691_gb_L22567.1_ATHCOR78A                                          |                                        | 248337_at   | 3.2 |
| pectinacetyltransferase precursor, putative similar to pectinacetyltransferase precursor                                                     | GI:1431629 from [Vigna radiata]        | 246403_at   | 3.2 |
| nodulin-like protein                                                                                                                         |                                        | 267044_at   | 3.2 |
| unknown protein contains a domain related to disease resistance genes and a proline-rich domain                                              |                                        | 265536_at   | 3.1 |
| putative beta-ketoacyl-CoA synthase Strong similarity to beta-keto-Coa synthase                                                              | gb U37088 from Simmondsia chinensis    | 264318_at   | 3.1 |
| putative SecA-type chloroplast protein transport factor Similar to gb X82404 chloroplast SecA protein from Pisum sativum                     |                                        | 262491_at   | 3.1 |
| unknown protein predicted by genefinder; similar to GPI2194125                                                                               |                                        | 260565_at   | 3.1 |
| unknown protein ;supported by full-length cDNA: Ceres:13102.                                                                                 |                                        | 260005_at   | 3.1 |
| CDC48 - like protein transitional endoplasmic reticulum ATPase, Arabidopsis thaliana, PIR:S60112                                             |                                        | 251975_at   | 3.1 |
| putative protein contains similarity to phytoeyanin/early nodulin-like protein                                                               |                                        | 248236_at   | 3.1 |
| putative protein predicted proteins, Arabidopsis thaliana and Drosophila melanogaster                                                        |                                        | 246897_at   | 3.1 |
| hypothetical protein                                                                                                                         |                                        | 265242_at   | 3   |
| unknown protein ; supported by cDNA: gi_13877764_gb_AF370145.1_AF370145                                                                      |                                        | 264989_at   | 3   |
| receptor-like protein glossy1 (gl1), putative similar to receptor-like protein glossy1 (gl1)                                                 | GI:1209703 from (Arabidopsis thaliana) | 264147_at   | 3   |
| transformer-SR ribonucleoprotein, putative similar to GB:Y09506 from [Nicotiana tabacum] (Plant Mol. Biol. 35 (3), 261-269 (1997)); supporte |                                        | 261081_at   | 3   |
| hypothetical protein similar to hypothetical protein GB:AAD20673 GI:4432823 from [Arabidopsis thaliana]                                      |                                        | 260951_at   | 3   |
| unknown protein ; supported by cDNA: gi_16604686_gb_AY059788.1_                                                                              |                                        | 260361_at   | 3   |
| hypothetical protein                                                                                                                         |                                        | 259570_at   | 3   |
| HSC70-interacting protein, putative similar to HSC70-INTERACTING PROTEIN                                                                     | GB:P50502 from [Homo sapiens]          | 258187_at   | 3   |
| RNA helicase - like protein Cdc28p, Schizosaccharomyces pombe, PID:G1439562                                                                  |                                        | 254675_at   | 3   |
| delta-1-pyrroline-5-carboxylate synthetase                                                                                                   |                                        | 251775_s_at | 3   |
| inhibition protein homolog probable inhibition protein - Brassica oleracea, PIR:S45033; supported by cDNA: gi_15292676_gb_AY050772.1_        |                                        | 251642_at   | 3   |
| unknown protein                                                                                                                              |                                        | 249870_at   | 3   |
| heat shock transcription factor                                                                                                              |                                        | 248936_at   | 3   |
| unknown protein                                                                                                                              |                                        | 248752_at   | 3   |
| putative protein similar to unknown protein (gb AAF16660.1);supported by full-length cDNA: Ceres:15457.                                      |                                        | 248759_at   | 3   |
| ubiquinol--cytochrome-c reductase-like protein ubiquinol--cytochrome-c reductase (EC 1.10.2.2) - Arabidopsis thaliana, PIR:T05357            |                                        | 246944_at   | 3   |
| Expressed protein ; supported by full-length cDNA: Ceres: 59.                                                                                |                                        | 246125_at   | 3   |
| step II splicing factor, putative similar to step II splicing factor SLU7                                                                    | GB:AAD13774 GI:4249705 (Homo sapiens)  | 264633_at   | 2.9 |
| unknown protein similar to hypothetical protein GB:AAF24564 GI:6692099 from [Arabidopsis thaliana]; supported by cDNA: gi_15810166_gb_       |                                        | 262347_at   | 2.9 |
| unknown protein ; supported by cDNA: gi_15809941_gb_AY054239.1_                                                                              |                                        | 259057_at   | 2.9 |
| unknown protein ; supported by full-length cDNA: Ceres: 118261.                                                                              |                                        | 258879_at   | 2.9 |
| Myb-family transcription factor, putative contains Pfam profile: PF00249: Myb-like DNA-binding domain                                        |                                        | 256198_at   | 2.9 |
| putative calcium-binding EF-hand protein ; supported by cDNA: gi_10862967_dbj_AB039924.1_AB039924                                            |                                        | 255795_at   | 2.9 |
| 82.09 and 30.80) similar to alternative splicing factor ASF                                                                                  |                                        | 255472_at   | 2.9 |
| alpha-amylase - like protein alpha-amylase, Vigna mungo, PIR2:S10514;supported by full-length cDNA: Ceres:3059.                              |                                        | 254101_at   | 2.9 |
| unknown protein ; supported by cDNA: gi_15450646_gb_AY052691.1_                                                                              |                                        | 250826_at   | 2.9 |
| RGA-like protein putative member of the VHLID domain transcription factor family RGA - Arabidopsis thaliana, EMBL:AJ224957                   |                                        | 246432_at   | 2.9 |
| anthocyanin2, putative similar to anthocyanin2 (An2) GI:7673088 from [Petunia integrifolia]; supported by cDNA: gi_3941507_gb_AF062908.      |                                        | 245628_at   | 2.9 |
| putative protein similarity to UVB-resistance protein UVR8, Arabidopsis thaliana, PIR:T50662--Contains Regulator of chromosome condensat     |                                        | 245210_at   | 2.9 |
| hypothetical protein                                                                                                                         |                                        | 257323_at   | 2.9 |
| hypothetical protein predicted by genscan and genefinder                                                                                     |                                        | 266590_at   | 2.8 |
| G-box binding bZIP transcription factor identical to PIR:S20885; supported by cDNA: gi_600862_gb_U17891.1_ATU17891                           |                                        | 266555_at   | 2.8 |
| predicted protein                                                                                                                            |                                        | 266012_s_at | 2.8 |
| unknown protein similar to putative DNA dependent ATPase and helicase                                                                        |                                        | 264805_at   | 2.8 |
| putative xylan endohydrolase similar to GB:AAD27896 to endoxylanases gi 1255238 (Thermoanaerobacterium thermosulfurigenes), gi 18135         |                                        | 264522_at   | 2.8 |
| hypothetical protein predicted by genefinder                                                                                                 |                                        | 263975_at   | 2.8 |
| FtsH protease, putative similar to zinc dependent protease GI:7650138 from [Arabidopsis thaliana]                                            |                                        | 262626_at   | 2.8 |
| mutM homologue-1 identical to mutM homologue-1 GI:3550982 from [Arabidopsis thaliana]; supported by cDNA: gi_3820619_gb_AF099970.            |                                        | 262129_at   | 2.8 |
| putative two-component phosphorelay mediator similar to two-component phosphorelay mediators (ATHP1-3) GB:BAA37110, GB:BAA37111              |                                        | 259329_at   | 2.8 |
| putative protein phosphatase-2C similar to protein phosphatase-2C GB:AAC36699 from [Mesembryanthemum crystallinum]; supported by cD          |                                        | 258901_at   | 2.8 |
| putative cinnamoyl-CoA reductase highly similar to F4P9.37;supported by full-length cDNA: Ceres:11254.                                       |                                        | 255787_at   | 2.8 |
| unknown protein similar to hypothetical protein GI:6016718 from (Arabidopsis thaliana)                                                       |                                        | 255739_at   | 2.8 |
| stress-induced protein sti1 -like protein stress-induced protein sti1 -Glycine max,PID:g872116                                               |                                        | 254839_at   | 2.8 |
| cytochrome P450-like protein cytochrome P450 CYP94A1 - Vicia sativa,PIR2:T08014                                                              |                                        | 252368_at   | 2.8 |
| dehydrin-like protein dehydrin Xero2 - Arabidopsis thaliana, EMBL:U19536                                                                     |                                        | 252137_at   | 2.8 |
| AP2 domain transcription factor-like protein                                                                                                 |                                        | 248389_at   | 2.8 |
| putative glucosyltransferase ;supported by full-length cDNA: Ceres:153418.                                                                   |                                        | 266532_at   | 2.7 |
| protein kinase-like protein                                                                                                                  |                                        | 247026_at   | 2.7 |
| histone H1 ;supported by full-length cDNA: Ceres:112970.                                                                                     |                                        | 265817_at   | 2.7 |
| putative heat shock protein ; supported by cDNA: gi_15450722_gb_AY053403.1_                                                                  |                                        | 263483_at   | 2.7 |
| CCAAT-binding factor B subunit, putative similar to CCAAT-binding factor B subunit GI:1173617 [Brassica napus]; supported by cDNA: gi_14     |                                        | 263158_at   | 2.7 |
| unknown protein ; supported by full-length cDNA: Ceres: 39741.                                                                               |                                        | 262204_at   | 2.7 |
| putative cytochrome P450 similar to cytochrome P450 89A2 GB:Q42602 [Arabidopsis thaliana]; supported by cDNA: gi_15983413_gb_AF424           |                                        | 259058_at   | 2.7 |
| putative DnaJ protein Pfam HMM hit: DnaJ, prokaryotic heat shock protein                                                                     |                                        | 258984_at   | 2.7 |
| copper amine oxidase like protein (fragment2) copper amine oxidase - Cicer arietinum,PID:e1335964                                            |                                        | 254833_s_at | 2.7 |
| Expressed protein ; supported by full-length cDNA: Ceres: 20948.                                                                             |                                        | 254278_at   | 2.7 |
| putative protein hypothetical proteins                                                                                                       |                                        | 252525_at   | 2.7 |
| homeobox-leucine zipper protein ATHB-12 ;supported by full-length cDNA: Ceres:32615.                                                         |                                        | 251272_at   | 2.7 |
| putative protein strong similarity to unknown protein (gb AAF31728.1); supported by cDNA: gi_15292740_gb_AY050804.1_                         |                                        | 249917_at   | 2.7 |
| unknown protein ; supported by cDNA: gi_14030678_gb_AF375430.1_AF375430                                                                      |                                        | 248969_at   | 2.7 |
| Ran binding protein 1 homolog - like Ran binding protein 1 homolog, Arabidopsis thaliana, EMBL:ATU62742                                      |                                        | 247771_at   | 2.7 |
| unknown protein contains similarity to phytochrome interacting factor 3 GI:3929586 from [Arabidopsis thaliana]; supported by cDNA: gi_14334  |                                        | 245748_at   | 2.7 |
| hypothetical protein                                                                                                                         |                                        | 244906_at   | 2.7 |
| putative ATP-dependent RNA helicase                                                                                                          |                                        | 267627_at   | 2.6 |
| unknown protein                                                                                                                              |                                        | 266757_at   | 2.6 |
| hypothetical protein                                                                                                                         |                                        | 265229_s_at | 2.6 |
| putative SF2/ASF splicing modulator, Srp30 similar to GB:CAB42558                                                                            |                                        | 264255_at   | 2.6 |

|                                                                                                                                                                  |             |     |
|------------------------------------------------------------------------------------------------------------------------------------------------------------------|-------------|-----|
| jacalin, putative similar to jacalin GI:289164 from [Artocarpus heterophyllus]                                                                                   | 262357_at   | 2.6 |
| unknown protein contains similarity to eukaryotic initiation factor 4B GI:6739515 from [Triticum aestivum]; supported by cDNA: gi_14335083_1                     | 261827_at   | 2.6 |
| hypothetical protein similar to putative MYB family transcription factor GB:AAD17429 GI:4335752 from [Arabidopsis thaliana]                                      | 260999_at   | 2.6 |
| NAM-like protein similar to NAM (no apical meristem) GB:CAA63101 from [Petunia x hybrida]                                                                        | 260203_at   | 2.6 |
| unknown protein similar to SPL1-related proteins: GB:CAB56771, GB:CAB56770, GB:CAB56773 [Arabidopsis thaliana]                                                   | 259971_at   | 2.6 |
| hypothetical protein similar to hypothetical protein GB:AAF02805 [Arabidopsis thaliana]                                                                          | 258944_at   | 2.6 |
| heat shock transcription factor HSF1, putative similar to GB:S52641 from [Arabidopsis thaliana] (Plant Mol. Biol. 26, 353-362 (1994)); supported by genemark.hmm | 258139_at   | 2.6 |
| seven in absentia-like protein similar to SINA1p GB:CAB40577 from [Vitis vinifera]; supported by cDNA: gi_16323493_gb_AY059135.1_1                               | 256789_at   | 2.6 |
| hypothetical protein                                                                                                                                             | 255723_at   | 2.6 |
| putative protein hypothetical protein, Synechocystis sp., PIR2:S76701                                                                                            | 254642_at   | 2.6 |
| putative protein putative DNA binding protein - Arabidopsis thaliana, TREMBL:ATAC2339_3; supported by cDNA: gi_16649060_gb_AY05991                               | 251644_at   | 2.6 |
| pectin methyl-esterase-like protein pectin methyl-esterase PER - Medicago truncatula, EMBL:AJ249611; supported by full-length cDNA: Cere                         | 250606_s_at | 2.6 |
| kinase - like protein RING3 protein, Homo sapiens, EMBL:X96670; supported by cDNA: gi_16604680_gb_AY059785.1_1                                                   | 250191_at   | 2.6 |
| glucose-6-phosphate dehydrogenase                                                                                                                                | 249372_at   | 2.6 |
| putative protein contains similarity to cyclin                                                                                                                   | 248988_at   | 2.6 |
| putative protein                                                                                                                                                 | 246285_at   | 2.6 |
| lipamide dehydrogenase, putative                                                                                                                                 | 262650_at   | 2.5 |
| hypothetical protein                                                                                                                                             | 266039_s_at | 2.5 |
| unknown protein ; supported by cDNA: gi_15810470_gb_AY056274.1_1                                                                                                 | 265484_at   | 2.5 |
| hypothetical protein contains Pfam profile: PF01363 FYVE zinc finger; supported by full-length cDNA: Ceres: 15739.                                               | 265035_at   | 2.5 |
| lactoylglutathione lyase-like protein Similar to protein gb Z74962 from Brassica oleracea which is similar to bacterial YRN1 and HEAHIO prot                     | 264372_at   | 2.5 |
| putative gigantea protein strong similarity to GB:CAB56039 from [Arabidopsis thaliana]; supported by cDNA: gi_6002679_gb_AF105064.1_AF                           | 264211_at   | 2.5 |
| putative ADP-glucose pyrophosphorylase large subunit                                                                                                             | 263544_at   | 2.5 |
| hypothetical protein predicted by genemark.hmm                                                                                                                   | 263127_at   | 2.5 |
| hypothetical protein similar to hypothetical protein GB:AAD50003 GI:5734738 from [Arabidopsis thaliana]; supported by full-length cDNA: Cere                     | 262452_at   | 2.5 |
| hypothetical protein predicted by genemark.hmm; supported by full-length cDNA: Ceres:19976.                                                                      | 262369_at   | 2.5 |
| unknown protein ; supported by cDNA: gi_13937194_gb_AF372951.1_AF372951                                                                                          | 262164_at   | 2.5 |
| unknown protein ; supported by full-length cDNA: Ceres:35675.                                                                                                    | 262050_at   | 2.5 |
| unknown protein                                                                                                                                                  | 260585_at   | 2.5 |
| hypothetical protein similar to GB:CAB55886 [Homo sapiens], GB:BAA09774 [Homo sapiens], GB:CAA87778 [Caenorhabditis elegans]                                     | 259759_at   | 2.5 |
| cathepsin B-like cysteine protease, putative similar to cathepsin B-like cysteine proteinase GI:609175 from [Nicotiana rustica]                                  | 259441_at   | 2.5 |
| putative aminotransferase similar to beta-alanine-pyruvate aminotransferase GB:BAA19549 [Rattus norvegicus], alanine-glyoxylate aminotra                         | 258983_at   | 2.5 |
| putative disease resistance protein similar to putative disease resistance protein GB:AAF01514 from clone F9F8                                                   | 258894_at   | 2.5 |
| late-embryogenesis abundant protein, putative similar to GI:4102692 from [Glycine max]                                                                           | 256464_at   | 2.5 |
| hypothetical protein predicted by genemark.hmm; supported by full-length cDNA: Ceres:37923.                                                                      | 255900_at   | 2.5 |
| expressed protein supported by cDNA: Ceres:13917.                                                                                                                | 254574_at   | 2.5 |
| putative protein ; supported by cDNA: gi_14517539_gb_AY039605.1_1                                                                                                | 252134_at   | 2.5 |
| dehydrin Xero2 ; supported by cDNA: gi_15809983_gb_AY054260.1_1                                                                                                  | 252102_at   | 2.5 |
| heat shock protein 70 (Hsc70-5) ; supported by cDNA: gi_6746589_gb_AF217458.1_AF217458                                                                           | 250502_at   | 2.5 |
| putative protein predicted protein, Arabidopsis thaliana                                                                                                         | 250050_at   | 2.5 |
| acetyl-CoA synthetase-like protein                                                                                                                               | 249869_at   | 2.5 |
| Fdr1 Cen - like protein Fdr1, Oryza sativa, EMBL:AF159883                                                                                                        | 247511_at   | 2.5 |
| unknown protein                                                                                                                                                  | 247340_at   | 2.5 |
| ribosomal protein L16                                                                                                                                            | 244944_s_at | 2.5 |
| hypothetical protein                                                                                                                                             | 257321_at   | 2.5 |
| putative tropinone reductase                                                                                                                                     | 266278_at   | 2.4 |
| unknown protein ; supported by cDNA: gi_14334955_gb_AY035151.1_1                                                                                                 | 265629_at   | 2.4 |
| hypothetical protein Similar to Nicotiana tumor-related protein (gb 26453)                                                                                       | 264661_at   | 2.4 |
| unknown protein                                                                                                                                                  | 264156_at   | 2.4 |
| hypothetical protein predicted by genemark.hmm; supported by cDNA: gi_11908125_gb_AF326910.1_AF326910                                                            | 264102_at   | 2.4 |
| unknown protein                                                                                                                                                  | 263296_at   | 2.4 |
| disulfide isomerase-related protein, putative similar to GB:AAB50217 from [Homo sapiens]                                                                         | 261167_at   | 2.4 |
| protein phosphatase 2C (AtP2C-HA) identical to protein phosphatase 2C (AtP2C-HA) GB:AJ003119 [Arabidopsis thaliana] (Plant Mol. Biol. 3                          | 259922_at   | 2.4 |
| unknown protein                                                                                                                                                  | 259718_at   | 2.4 |
| hypothetical protein contains similarity to invertase inhibitor GB:CAA73333 GI:2765240 from [Nicotiana tabacum]; supported by full-length cDI                    | 259616_at   | 2.4 |
| (1-4)-beta-mannan endohydrolase precursor, putative similar to (1-4)-beta-mannan endohydrolase precursor GI:9836826 from [Lycopersicon                           | 259442_at   | 2.4 |
| phi-1-like protein similar to phi-1 (phosphate induced protein) GB:BAA33810 [Nicotiana tabacum]                                                                  | 258605_at   | 2.4 |
| unknown protein contains RanBP1 domain; supported by full-length cDNA: Ceres:108414.                                                                             | 258313_at   | 2.4 |
| hypothetical protein predicted by genscan+; supported by full-length cDNA: Ceres:108820.                                                                         | 257985_at   | 2.4 |
| unknown protein similar to hypothetical protein GB:CAB43880; supported by cDNA: gi_15146307_gb_AY049295.1_1                                                      | 257056_at   | 2.4 |
| chaperonin 60 beta, putative very similar to GB:JT0901 from [Arabidopsis thaliana] (Gene 111 (2), 175-181 (1992))                                                | 256983_at   | 2.4 |
| Eukaryotic translation initiation factor 5, putative Eukaryotic translation initiation factor 5 [Zea mays] GI:4160402; supported by cDNA: gi_158                 | 256502_at   | 2.4 |
| hypothetical protein                                                                                                                                             | 253350_at   | 2.4 |
| Expressed protein ; supported by full-length cDNA: Ceres: 263956.                                                                                                | 253047_at   | 2.4 |
| Spot 3 protein and vacuolar sorting receptor homolog/AtELP1 ; supported by cDNA: gi_15081792_gb_AY048289.1_1                                                     | 252027_at   | 2.4 |
| protein kinase-like protein Pto kinase interactor 1 - Lycopersicon esculentum, EMBL:U28007; supported by cDNA: gi_15451117_gb_AY0546                             | 251494_at   | 2.4 |
| ferritin 1 precursor ; supported by full-length cDNA: Ceres:1100.                                                                                                | 251109_at   | 2.4 |
| putative protein putative proteins - Arabidopsis thaliana; supported by cDNA: gi_15292802_gb_AY050835.1_1                                                        | 251084_at   | 2.4 |
| putative protein crp1 protein, Zea mays, PIR:T01685                                                                                                              | 250987_at   | 2.4 |
| putative protein P58 protein, Bos primigenius taurus, PIR:A56534; supported by full-length cDNA: Ceres:146009.                                                   | 250930_at   | 2.4 |
| fatty acid elongase - like protein KCS1 fatty acid elongase 3-ketoacyl-CoA synthase 1, Arabidopsis thaliana, EMBL:AF053345                                       | 250891_at   | 2.4 |
| chaperonin 60 alpha chain - like protein chaperonin 60 alpha chain precursor, garden pea, PIR:T06518                                                             | 249977_at   | 2.4 |
| phytochrome C (sp P14714)                                                                                                                                        | 249666_at   | 2.4 |
| putative protein predicted proteins, Arabidopsis thaliana; supported by cDNA: gi_15810554_gb_AY056316.1_1                                                        | 249614_at   | 2.4 |
| dihydroflavonol 4-reductase                                                                                                                                      | 249215_at   | 2.4 |
| putative protein similar to unknown protein (pir H71431); supported by full-length cDNA: Ceres:31680.                                                            | 248763_at   | 2.4 |
| unknown protein                                                                                                                                                  | 248774_at   | 2.4 |
| unknown protein ; supported by full-length cDNA: Ceres:253359.                                                                                                   | 248228_at   | 2.4 |
| similar to unknown protein (gb AAF63134.1)                                                                                                                       | 247803_at   | 2.4 |
| protein kinase ; supported by cDNA: gi_16974578_gb_AY060555.1_1                                                                                                  | 247384_at   | 2.4 |
| putative retroelement pol polyprotein                                                                                                                            | 266187_at   | 2.3 |
| hypothetical protein predicted by genscan; supported by cDNA: gi_15028050_gb_AY045882.1_1                                                                        | 265596_at   | 2.3 |

|                                                                                                                                                |             |     |
|------------------------------------------------------------------------------------------------------------------------------------------------|-------------|-----|
| putative RNA-binding protein ; supported by cDNA: gi_6650522_gb_AF101056.1_AF101056                                                            | 265266_at   | 2.3 |
| gamma glutamyl hydrolase, putative similar to gamma glutamyl hydrolase GI:1680711 from [Glycine max];supported by full-length cDNA: Cei        | 264300_at   | 2.3 |
| unknown protein ;supported by full-length cDNA: Ceres:3807.                                                                                    | 261154_at   | 2.3 |
| hypothetical protein similar to dehydrogenase-like protein GI:9279732 from [Arabidopsis thaliana]                                              | 260688_at   | 2.3 |
| putative heat-shock protein similar to heat-shock protein precursor GB:S49340 [Secale cereale]; contains Pfam profile: Heat shock hsp90 pro    | 259248_at   | 2.3 |
| putative short-chain type dehydrogenase/reductase similar to short-chain type dehydrogenase/reductase GB:Q08632 [Picea abies]; supporte        | 258815_at   | 2.3 |
| unknown protein ; supported by cDNA: gi_13937210_gb_AF372960.1_AF372960                                                                        | 258400_at   | 2.3 |
| CDPK-related kinase identical to GB:2AAD38059 from [Arabidopsis thaliana]                                                                      | 257024_at   | 2.3 |
| beta-amylase, putative similar to beta-amylase GB:CAB58423 [Arabidopsis thaliana]; supported by cDNA: gi_14194172_gb_AF367293.1_AF             | 256861_at   | 2.3 |
| unknown protein ;supported by full-length cDNA: Ceres:36434.                                                                                   | 256061_at   | 2.3 |
| UDP-glucose glucosyltransferase, putative similar to UDP-glucose glucosyltransferase GI:3928543 from [Arabidopsis thaliana]; supported by      | 255943_at   | 2.3 |
| putative fibrillin ; supported by full-length cDNA: Ceres: 1461.                                                                               | 255364_s_at | 2.3 |
| putative protein Mei2-like protein, Arabidopsis thaliana, gb:D86122                                                                            | 254679_at   | 2.3 |
| putative protein cyclin C homolog 1, Schizosaccharomyces pombe, PATCHX:G2055413                                                                | 254526_at   | 2.3 |
| trehalose-6-phosphate phosphatase - like protein trehalose-6-phosphate phosphatase (AtTPPA), PID:g2944178                                      | 254321_at   | 2.3 |
| abscisic acid responsive elements-binding factor(ABF3) identical to abscisic acid responsive elements-binding factor (ABF3) GI:6739280 from    | 253263_at   | 2.3 |
| putative sugar transporter protein sugar transporter, Arabidopsis thaliana, db_xref=PID:g1495273                                               | 253188_at   | 2.3 |
| putative protein glutamic acid-rich protein precursor, Plasmodium falciparum (GARP), PIR2:A54514                                               | 253111_at   | 2.3 |
| putative protein various predicted proteins, Arabidopsis thaliana                                                                              | 253092_at   | 2.3 |
| hypothetical protein                                                                                                                           | 253020_at   | 2.3 |
| putative protein activating signal cointegrator 1 - Homo sapiens, EMBL:AF168418; supported by full-length cDNA: Ceres:13265.                   | 252424_at   | 2.3 |
| putative protein                                                                                                                               | 250956_at   | 2.3 |
| cysteine proteinase inhibitor-like protein ;supported by full-length cDNA: Ceres:27304.                                                        | 250811_at   | 2.3 |
| putative protein strong similarity to unknown protein (emb CAB62118.1)                                                                         | 250786_at   | 2.3 |
| putative protein strong similarity to unknown protein (gb AAC98056.1)                                                                          | 250237_at   | 2.3 |
| FtsH protease, putative similar to FtsH-like protein Ptf precursor GI:4325041 from [Nicotiana tabacum]                                         | 250162_at   | 2.3 |
| putative protein mDj10, Mus musculus, EMBL:AB028860; supported by cDNA: gi_15450366_gb_AY052284.1_                                             | 249613_at   | 2.3 |
| putative protein similar to unknown protein (pir T05226);supported by full-length cDNA: Ceres:96.                                              | 249174_at   | 2.3 |
| unknown protein ;supported by full-length cDNA: Ceres:25275.                                                                                   | 248709_at   | 2.3 |
| permease                                                                                                                                       | 248558_at   | 2.3 |
| homogentisate 1,2-dioxygenase ;supported by full-length cDNA: Ceres:6599.                                                                      | 248193_at   | 2.3 |
| protein phosphatase 2C ABI2 (PP2C) (sp O04719)                                                                                                 | 247957_at   | 2.3 |
| putative protein similar to unknown protein (dbj BAA96220.1); supported by full-length cDNA: Ceres: 16835.                                     | 247295_at   | 2.3 |
| atfp6-like protein                                                                                                                             | 247128_at   | 2.3 |
| AP2 domain containing protein AP2 domain containing protein RAP2.4 - Arabidopsis thaliana, EMBL:AF003097                                       | 246939_at   | 2.3 |
| HSP100/ClpB, putative similar to HSP100/ClpB GI:9651530 [Phaseolus lunatus]                                                                    | 246554_at   | 2.3 |
| allergen like protein                                                                                                                          | 245463_at   | 2.3 |
| ATP synthase subunit 9                                                                                                                         | 257339_s_at | 2.3 |
| NAM / CUC2 -like protein nap gene, Arabidopsis thaliana, PID:g2780192; supported by cDNA: gi_15912330_gb_AY056443.1_                           | 253132_at   | 2.3 |
| hypothetical protein predicted by genefinder; supported by cDNA: gi_16323181_gb_AY057695.1_                                                    | 267248_at   | 2.2 |
| putative beta-alanine-pyruvate aminotransferase ;supported by full-length cDNA: Ceres:147543.                                                  | 267035_at   | 2.2 |
| unknown protein ; supported by cDNA: gi_15010737_gb_AY045670.1_                                                                                | 266984_at   | 2.2 |
| unknown protein                                                                                                                                | 266874_at   | 2.2 |
| putative thiamin biosynthesis protein                                                                                                          | 266673_at   | 2.2 |
| unknown protein                                                                                                                                | 266628_at   | 2.2 |
| hypothetical protein                                                                                                                           | 266013_s_at | 2.2 |
| hypothetical protein predicted by genscan                                                                                                      | 265902_at   | 2.2 |
| putative WD-40 repeat protein similar to TUP1(GB:AF079369); supported by cDNA: gi_13605894_gb_AF367346.1_AF367346                              | 265259_at   | 2.2 |
| hypothetical protein                                                                                                                           | 265233_s_at | 2.2 |
| hypothetical protein                                                                                                                           | 265238_s_at | 2.2 |
| ribosomal protein identical to ribosomal protein GI:806279 from [Arabidopsis thaliana]                                                         | 265032_at   | 2.2 |
| stress related protein, putative similar to stress related protein GI:5802955 from [Vitis riparia];supported by full-length cDNA: Ceres:14043. | 264968_at   | 2.2 |
| hypothetical protein similar to membrane associated salt inducible protein isolog; similar to F21B7.16 and F21B7.18                            | 264819_at   | 2.2 |
| hypothetical protein predicted by genemark.hmm;supported by full-length cDNA: Ceres:25383.                                                     | 264186_at   | 2.2 |
| unknown protein ;supported by full-length cDNA: Ceres:151404.                                                                                  | 264086_at   | 2.2 |
| hypothetical protein predicted by genscan                                                                                                      | 263471_at   | 2.2 |
| unknown protein                                                                                                                                | 262677_at   | 2.2 |
| beta-VPE nearly identical to beta-VPE GB:BAA09615 GI:1805364 [Arabidopsis thaliana]; supported by cDNA: gi_14194096_gb_AF367254.1_             | 262644_at   | 2.2 |
| transcription factor, putative similar to transcription factor GB:CAA74050 GI:2398525 from [Arabidopsis thaliana]                              | 261803_at   | 2.2 |
| fatty acid elongase 3-ketoacyl-CoA synthase, putative similar to GB:AAC99312 from [Arabidopsis thaliana] (Plant J. (1999) In press); support   | 261420_at   | 2.2 |
| hypothetical protein contains Pfam profile: PF01965 ThiJ/PfpI family;supported by full-length cDNA: Ceres:101735.                              | 260616_at   | 2.2 |
| endochitinase isolog                                                                                                                           | 260568_at   | 2.2 |
| feebly-like protein similar to feebly protein GB:S70648 [Lycopersicon esculentum] (tomato knockout developed into small fragile plants)        | 260060_at   | 2.2 |
| unknown protein                                                                                                                                | 259942_at   | 2.2 |
| putative thioredoxin similar to protein disulfide isomerase precursor GB:P29828 [Medicago sativa]; Pfam HMM hit: Thioredoxins                  | 259757_at   | 2.2 |
| hypothetical protein contains bromodomain, predicted by genscan; supported by cDNA: gi_16323116_gb_AY057662.1_                                 | 259164_at   | 2.2 |
| unknown protein                                                                                                                                | 258264_at   | 2.2 |
| AMP-binding protein, putative similar to AMP-binding protein GB:CAA96521 from [Brassica napus] (Plant Mol. Biol. (1997) 33 (5), 911-922)       | 257196_at   | 2.2 |
| CLC-b chloride channel protein identical to CLC-b chloride channel protein GB:CAA96058 from [Arabidopsis thaliana] (J. Biol. Chem. 271 (52     | 256751_at   | 2.2 |
| pinhead-like protein similar to pinhead [Arabidopsis thaliana] GI:5107374                                                                      | 256293_at   | 2.2 |
| unknown protein contains Pfam profile: PF00917 MATH domain; supported by cDNA: gi_12083245_gb_AF332419.1_AF332419                              | 256021_at   | 2.2 |
| putative chalcone synthase similar to plant chalcone and stilbene synthases;supported by full-length cDNA: Ceres:21877.                        | 255703_at   | 2.2 |
| putative microfibril-associated protein                                                                                                        | 255093_s_at | 2.2 |
| cytochrome P450 cytochrome P450, Arabidopsis thaliana; supported by cDNA: gi_15293092_gb_AY050980.1_                                           | 254562_at   | 2.2 |
| putative protein KIAA0682 protein, Homo sapiens, AB014582                                                                                      | 254527_at   | 2.2 |
| subtilisin proteinase - like subtilisin-like proteinase ag12, Alnus glutinosa, PIR2:S52769; supported by cDNA: gi_16649028_gb_AY059884.1_      | 254377_at   | 2.2 |
| putative protein deubiquitinating enzyme (DUB-1), Mus musculus, PIR2:JC6133                                                                    | 253542_at   | 2.2 |
| putative protein                                                                                                                               | 253407_at   | 2.2 |
| thaumatin-like protein thaumatin-like protein, Arabidopsis thaliana, PIR2:S71175; supported by cDNA: gi_13430505_gb_AF360165.1_AF3601          | 253104_at   | 2.2 |
| anthranilate phosphoribosyltransferase-like protein anthranilate phosphoribosyltransferase - Pisum sativum, PIR:T06460; supported by cDNA      | 251563_at   | 2.2 |
| putative protein leucine zipper-EF-hand containing transmembrane protein 1 - Mus musculus, EMBL:AF061026                                       | 251432_at   | 2.2 |
| unknown protein ;supported by full-length cDNA: Ceres:22350.                                                                                   | 250554_at   | 2.2 |
| expressed protein predicted protein, Synechocystis sp., PIR:S77152; supported by full-length cDNA: Ceres: 5331.                                | 249454_at   | 2.2 |

|                                                                                                                                                 |             |     |
|-------------------------------------------------------------------------------------------------------------------------------------------------|-------------|-----|
| putative protein contains similarity to unknown protein (pir T08554); supported by full-length cDNA: Ceres: 266884.                             | 247945_at   | 2.2 |
| outer membrane lipoprotein - like outer membrane lipoprotein, Citrobacter freundii, PIR:140710; supported by full-length cDNA: Ceres:17098.     | 247851_at   | 2.2 |
| cysteine proteinase AALP identical to AALP protein GI:7230640 from [Arabidopsis thaliana]; similar to barley aleurain; supported by full-length | 247627_at   | 2.2 |
| putative protein MTN19, Medicago truncatula, EMBL:MTY15367                                                                                      | 247488_at   | 2.2 |
| putative protein similar to unknown protein (pir  T09249); supported by cDNA: gi_15081693_gb_AY048239.1_                                        | 247061_at   | 2.2 |
| Lon protease homolog 2 precursor almost identical to Lon protease homolog 2 mitochondrial precursor SP:P93655, GI:1848290 from [Arabic          | 246850_at   | 2.2 |
| pyrroline-5-carboxylate reductase ; supported by full-length cDNA: Ceres:36386.                                                                 | 246594_at   | 2.2 |
| hypothetical protein                                                                                                                            | 244903_at   | 2.2 |
| unknown protein similar to GP 2262147 AC002330                                                                                                  | 267628_at   | 2.1 |
| putative heat shock transcription factor                                                                                                        | 266841_at   | 2.1 |
| unknown protein                                                                                                                                 | 266503_at   | 2.1 |
| AP2 domain transcription factor                                                                                                                 | 263823_s_at | 2.1 |
| FtsH protease, putative contains similarity to chloroplast FtsH protease GI:5804782 from [Nicotiana tabacum]                                    | 262937_at   | 2.1 |
| unknown protein ESTs gb H37032, gb R6425, gb Z34651, gb N37268, gb AA713172 and gb Z34241 come from this gene; supported by full-le             | 262600_at   | 2.1 |
| hypothetical protein predicted by genemark.hmm; supported by full-length cDNA: Ceres:21663.                                                     | 262047_at   | 2.1 |
| unknown protein                                                                                                                                 | 261558_at   | 2.1 |
| hypothetical protein contains similarity to MTN3 (nodule development protein) GB:Y08726 GI:1619601 from [Medicago truncatula]; supported l      | 260876_at   | 2.1 |
| unknown protein                                                                                                                                 | 260155_at   | 2.1 |
| unknown protein ; supported by full-length cDNA: Ceres:114376.                                                                                  | 259977_at   | 2.1 |
| unknown protein similar to unknown protein GB:AAC32238 (Arabidopsis thaliana)                                                                   | 259169_at   | 2.1 |
| putative disease resistance protein similar to putative disease resistance protein GB:AAF01514 from clone F9F8                                  | 258893_at   | 2.1 |
| hypothetical protein predicted by genscan+; supported by full-length cDNA: Ceres:101876.                                                        | 258878_at   | 2.1 |
| hypothetical protein similar to hypothetical proteins GB:AAC35225, GB:AAD22358, GB:AAD22682 [Arabidopsis thaliana]                              | 258817_at   | 2.1 |
| unknown protein similar to GB:AAD10646 [Arabidopsis thaliana]; supported by full-length cDNA: Ceres:117342.                                     | 258812_at   | 2.1 |
| hypothetical protein predicted by genscan                                                                                                       | 258696_at   | 2.1 |
| hypothetical protein predicted by genscan+; supported by cDNA: gi_15810242_gb_AY056160.1_                                                       | 258374_at   | 2.1 |
| unknown protein                                                                                                                                 | 257239_at   | 2.1 |
| purple acid phosphatase, putative similar to purple acid phosphatase GB:CAA06921 [Ipomoea batatas]                                              | 257087_at   | 2.1 |
| beta-fructofuranosidase, putative similar to beta-fructofuranosidase 1 GB:S37212 from [Arabidopsis thaliana]                                    | 256779_at   | 2.1 |
| hypothetical protein predicted by genemark.hmm                                                                                                  | 256653_at   | 2.1 |
| unknown protein ; supported by cDNA: gi_14194136_gb_AF367274.1_AF367274                                                                         | 256343_at   | 2.1 |
| 26S proteasome regulatory subunit S12, putative nearly identical to 26S proteasome regulatory subunit S12 (MOV34 ) SP:O24412 [Arabidop          | 256249_at   | 2.1 |
| calreticulin (crt1) identical to calreticulin (crt1) GI:2052379 [Arabidopsis thaliana]; supported by cDNA: gi_2052378_gb_U66343.1_ATU66343      | 256216_at   | 2.1 |
| GBF2, G-box binding factor ; supported by full-length cDNA: Ceres:16533.                                                                        | 255625_at   | 2.1 |
| putative protein several hypothetical proteins - Arabidopsis thaliana                                                                           | 254872_at   | 2.1 |
| putative protein                                                                                                                                | 254778_at   | 2.1 |
| myb-related protein M4 ; supported by full-length cDNA: Ceres:33333.                                                                            | 254413_at   | 2.1 |
| putative major latex protein major latex protein type 1 - Arabidopsis thaliana, EMBL:X91960; supported by full-length cDNA: Ceres:108949.       | 254225_at   | 2.1 |
| hsp 70-like protein heat shock 70 protein - Spinacia oleracea, PID:g2654208                                                                     | 254148_at   | 2.1 |
| pumilio-like protein abdominal segment formation protein pumilio - fruitfly, PIR2:A46221; supported by cDNA: gi_13430771_gb_AF360298.1_         | 254045_at   | 2.1 |
| SOF1 protein-like protein SOF1 (involved in rRNA processing) protein-yeast; supported by cDNA: gi_13937178_gb_AF372943.1_AF372943               | 253777_at   | 2.1 |
| putative protein ; supported by cDNA: gi_11177136_dbj_AB050977.1_AB050977                                                                       | 253610_at   | 2.1 |
| cinnamoyl-CoA reductase - like protein cinnamoyl-CoA reductase, Saccharum officinarum, gb:AJ231134; supported by full-length cDNA: Cer          | 253638_at   | 2.1 |
| glucose-1-phosphate adenyltransferase (APL3) ; supported by cDNA: gi_16648984_gb_AY059862.1_                                                    | 252888_at   | 2.1 |
| protein kinase - like protein Raf protein kinase homolog CTR1 - Arabidopsis thaliana, PIR2:A45178                                               | 252469_at   | 2.1 |
| aquaporin MIP - like protein aquaporin 2, Samanea saman, AF067185; supported by full-length cDNA: Ceres: 11929.                                 | 251858_at   | 2.1 |
| putative protein several hypothetical proteins - Arabidopsis thaliana                                                                           | 251211_s_at | 2.1 |
| putative protein several hypothetical proteins - different bacteria                                                                             | 251137_at   | 2.1 |
| calnexin homolog                                                                                                                                | 250625_at   | 2.1 |
| diacylglycerol kinase (ATDGK1) ; supported by cDNA: gi_1374771_dbj_D63787.1_ATHATDGK1                                                           | 250556_at   | 2.1 |
| serine/threonine protein kinase -like protein probable serine/threonine protein kinase SNFL3, sorghum, PIR:T14822; supported by cDNA: gi_       | 250408_at   | 2.1 |
| NAM (no apical meristem)-like protein ; supported by cDNA: gi_14326464_gb_AF385685.1_AF385685                                                   | 249944_at   | 2.1 |
| ATP-dependent Clp protease ATP-binding subunit (ClpD), ERD1 protein precursor identical to ERD1 protein GI:497629, SP:P42762 from [Ar           | 248487_at   | 2.1 |
| dehydrodolicyl diphosphate - like protein dehydrodolicyl diphosphate, Arabidopsis thaliana, EMBL:ATH277136                                      | 247780_at   | 2.1 |
| unknown protein                                                                                                                                 | 247350_at   | 2.1 |
| acyl-CoA oxidase (gb AAC13497.1) ; supported by cDNA: gi_3044211_gb_AF057043.1_AF057043                                                         | 247176_at   | 2.1 |
| putative protein myosin heavy chain, chicken, PIR:S24348; supported by full-length cDNA: Ceres:147806.                                          | 246796_at   | 2.1 |
| luminal binding protein ; supported by cDNA: gi_1303694_dbj_D84414.1_ATHBIPA                                                                    | 245956_s_at | 2.1 |
| transcriptional adaptor like protein ; supported by cDNA: gi_15215639_gb_AY050348.1_                                                            | 245288_at   | 2.1 |
| putative protein disulfide-isomerase                                                                                                            | 245175_at   | 2.1 |
| unknown protein Location of EST gb N95878                                                                                                       | 264167_at   | 2   |
| putative protein disulfide isomerase ; supported by cDNA: gi_15810003_gb_AY054270.1_                                                            | 267605_at   | 2   |
| hypothetical protein predicted by genscan and genefinder; supported by cDNA: gi_4837732_gb_AF085354.1_AF085354                                  | 267512_at   | 2   |
| putative potassium transporter                                                                                                                  | 267423_at   | 2   |
| hypothetical protein predicted by genscan                                                                                                       | 267268_at   | 2   |
| putative casein kinase I                                                                                                                        | 266651_at   | 2   |
| putative pumilio/Mpt5 family RNA-binding protein                                                                                                | 266288_s_at | 2   |
| hypothetical protein                                                                                                                            | 265147_at   | 2   |
| unknown protein ; supported by full-length cDNA: Ceres:13385.                                                                                   | 264985_at   | 2   |
| putative acyl-CoA synthetase ; supported by cDNA: gi_15450592_gb_AY052664.1_                                                                    | 263811_at   | 2   |
| putative protein RIO1 protein, Saccharomyces cerevisiae, PIR:S61006; supported by full-length cDNA: Ceres:42141.                                | 263532_s_at | 2   |
| bZIP transcription factor (POSF21) identical to GB:Q04088; supported by cDNA: gi_15982853_gb_AY057534.1_                                        | 263253_at   | 2   |
| putative zinc-binding protein similar to zinc-binding protein (gij3249068)                                                                      | 263259_at   | 2   |
| unknown protein                                                                                                                                 | 262860_at   | 2   |
| putative cytochrome P450 monooxygenase strong similarity to gb X97864 cytochrome P450 from Arabidopsis thaliana and is a member of th           | 262780_at   | 2   |
| hypothetical protein similar to hypothetical protein GB:AAD45997 GI:5668770 from (Arabidopsis thaliana)                                         | 262322_at   | 2   |
| transcription factor, putative similar to Transcription factor GB:CAA74053 GI:2398533 from [Arabidopsis thaliana]; supported by full-length cD  | 262098_at   | 2   |
| hypothetical protein contains similarity to PP2 lectin polypeptide GI:410436 from [Cucurbita maxima]; supported by cDNA: gi_15292968_gb_#       | 262061_at   | 2   |
| gibberellin 3 beta-hydroxylase, putative similar to gibberellin 3 beta-hydroxylase GI:3982753 from [Arabidopsis thaliana]; supported by cDNA:   | 261768_at   | 2   |
| hypothetical protein predicted by genemark.hmm; supported by full-length cDNA: Ceres:28026.                                                     | 260622_at   | 2   |
| hypothetical protein predicted by genscan+                                                                                                      | 260594_at   | 2   |
| ankyrin-like protein similar to ankyrin proteins: GB:CAA48803 [Mus musculus], GB:CAA40279 [Homo sapiens], GB:AAB47551 [Rattus norveg            | 258794_at   | 2   |
| rotamase FKBP (ROF1) identical to rotamase FKBP (ROF1) GB:U49453 [Arabidopsis thaliana] (Mol. Gen. Genet. 252 (5), 510-517 (1996)); ;           | 257822_at   | 2   |

|                                                                                                                                                      |             |     |
|------------------------------------------------------------------------------------------------------------------------------------------------------|-------------|-----|
| metalloprotease, putative similar to metalloprotease 1 GB: AAC67244 from [Homo sapiens]                                                              | 257033_at   | 2   |
| mitochondrial chaperonin hsp60 identical to mitochondrial chaperonin hsp60 GB: Z11547 [Arabidopsis thaliana] (Plant Mol. Biol. 18 (5), 873-8)        | 256905_at   | 2   |
| major latex protein, putative similar to major latex protein type1 GB: CAA63026 [Arabidopsis thaliana]; supported by full-length cDNA: Ceres: i      | 256880_at   | 2   |
| isoamylase-like protein probable isoamylase (EC 3.2.1.68) su1 - Zea mays, PIR2: T01321                                                               | 255070_at   | 2   |
| putative protein (fragment) ATP(GTP)-binding protein, Homo sapiens, AJ010842; supported by full-length cDNA: Ceres: 6952.                            | 254375_at   | 2   |
| ADP, ATP carrier-like protein ADP, ATP carrier protein-rice, PIR2: S33630; supported by full-length cDNA: Ceres: 42036.                              | 253776_at   | 2   |
| putative protein kinase serine/threonine protein kinase, Arabidopsis thaliana, PID: D1006875; supported by cDNA: gi_14334745_gb_AY0350               | 253550_at   | 2   |
| nucellin-like protein nucellin - Hordeum vulgare, PIR: G2290202; supported by full-length cDNA: Ceres: 24738.                                        | 253331_at   | 2   |
| putative protein ; supported by full-length cDNA: Ceres: 8161.                                                                                       | 253322_at   | 2   |
| cinnamyl alcohol dehydrogenase - like protein cinnamyl alcohol dehydrogenase, Populus deltoides, PATCHX: G288753; supported by cDNA:                 | 253277_at   | 2   |
| hypothetical protein                                                                                                                                 | 252432_at   | 2   |
| ABC-type transport protein-like protein AbcA, Dictyostelium discoideum, DDU66526                                                                     | 252379_at   | 2   |
| putative protein various predicted proteins; supported by full-length cDNA: Ceres: 6508.                                                             | 252281_at   | 2   |
| translation releasing factor RF-1-like protein translation releasing factor RF-1, Synechocystis sp., PIR: S76914                                     | 251193_at   | 2   |
| putative protein ; supported by full-length cDNA: Ceres: 7731.                                                                                       | 251010_at   | 2   |
| putative protein salt-inducible protein, membrane-associated, common tobacco, PIR: T02047; supported by cDNA: gi_15810430_gb_AY0562                  | 250856_at   | 2   |
| putative protein                                                                                                                                     | 250158_at   | 2   |
| glutathione S-transferase-like protein ; supported by cDNA: gi_11096011_gb_AF288189.1_AF288189                                                       | 250083_at   | 2   |
| putative protein similar to unknown protein (pir) T04732)                                                                                            | 249113_at   | 2   |
| spermidine synthase ; supported by full-length cDNA: Ceres: 33021.                                                                                   | 248248_at   | 2   |
| putative protein contains similarity to protein kinase                                                                                               | 247918_at   | 2   |
| putative protein predicted protein, Arabidopsis thaliana; supported by cDNA: gi_13899116_gb_AF370553.1_AF370553                                      | 247507_at   | 2   |
| RNA helicase ; supported by cDNA: gi_14517481_gb_AY039576.1_                                                                                         | 247465_at   | 2   |
| putative protein similar to unknown protein (pir) T01257)                                                                                            | 247386_at   | 2   |
| lysosomal Pro-X carboxypeptidase                                                                                                                     | 247156_at   | 2   |
| putative protein contains similarity to unknown protein (sp Q10058); supported by full-length cDNA: Ceres: 108335.                                   | 246985_at   | 2   |
| lethal leaf-spot 1 homolog Lls1                                                                                                                      | 246335_at   | 2   |
| PPR-repeat protein, putative contains multiple PPR domains: PF01535: PPR repeat                                                                      | 246313_at   | 2   |
| putative protein predicted proteins, Arabidopsis thaliana; supported by full-length cDNA: Ceres: 32958.                                              | 245905_at   | 2   |
| chaperonin precursor, putative similar to chaperonin precursor GI: 806807 from [Pisum sativum]                                                       | 245876_at   | 2   |
| Dr4 (protease inhibitor) identical to Dr4 GI: 469114 from [Arabidopsis thaliana]; supported by cDNA: gi_13877842_gb_AF370184.1_AF370184              | 245736_at   | 2   |
| cytochrome c biogenesis orf452                                                                                                                       | 244951_s_at | 2   |
| hypothetical protein                                                                                                                                 | 244921_s_at | 2   |
| hypothetical protein                                                                                                                                 | 244924_at   | 2   |
| hypothetical protein                                                                                                                                 | 257332_at   | 2   |
| cyclic nucleotide gated channel (CNGC4) like protein Arabidopsis thaliana cyclic nucleotide gated channel (CNGC4), PID: g4378659                     | 255599_at   | 1.9 |
| putative small heat shock protein ; supported by full-length cDNA: Ceres: 99763.                                                                     | 267336_at   | 1.9 |
| Expressed protein ; supported by full-length cDNA: Ceres: 123915.                                                                                    | 267036_at   | 1.9 |
| putative nonspecific lipid-transfer protein ; supported by full-length cDNA: Ceres: 18328.                                                           | 266415_at   | 1.9 |
| putative glycine-rich protein ; supported by cDNA: gi_15215617_gb_AY050337.1_                                                                        | 265511_at   | 1.9 |
| hypothetical protein                                                                                                                                 | 265195_at   | 1.9 |
| putative 26S protease regulatory subunit 6A Similar to probable Mg-dependent ATPase (pir S56671). ESTs gb T46782.gb AA04798 come frc                 | 264657_at   | 1.9 |
| hypothetical protein contains similarity to glycogenin GI: 165512 from [Oryctolagus cuniculus]                                                       | 264476_at   | 1.9 |
| hypothetical protein Similar to hypothetical protein SPAC2F7.14c gi 1052797 from Schizosaccharomyces pombe cosmid gb Z50142                          | 264357_at   | 1.9 |
| unknown protein                                                                                                                                      | 263515_at   | 1.9 |
| unknown protein                                                                                                                                      | 263513_at   | 1.9 |
| cytoplasmic aconitate hydratase                                                                                                                      | 263348_at   | 1.9 |
| dynamamin-like protein                                                                                                                               | 263278_at   | 1.9 |
| hypothetical protein predicted by genemark.hmm; supported by full-length cDNA: Ceres: 94743.                                                         | 263151_at   | 1.9 |
| hypothetical protein similar to putative disease resistance protein GB: CAB40943 GI: 4586107 from [Arabidopsis thaliana]                             | 262326_at   | 1.9 |
| ABC transporter protein, putative similar to ABC transporter protein GB: AAF31030 GI: 6899653 from [Leishmania major]                                | 262005_at   | 1.9 |
| hypothetical protein contains similarity to spastin protein orthologue GB: CAB60143 GI: 6273572 from [Mus musculus]                                  | 261889_at   | 1.9 |
| hypothetical protein predicted by genemark.hmm                                                                                                       | 261524_at   | 1.9 |
| unknown protein contains similarity to set protein GI: 338038 from [Homo sapiens]; supported by full-length cDNA: Ceres: 27467.                      | 261406_at   | 1.9 |
| Ca <sup>2+</sup> -dependent membrane-binding protein annexin identical to GB: AAD34236 from [Arabidopsis thaliana]; supported by full-length cDNA: C | 261285_at   | 1.9 |
| phosphoethanolamine N-methyltransferase, putative similar to GB: AAF61950 from [Spinacia oleracea]; supported by cDNA: gi_16226648_gb                | 261309_at   | 1.9 |
| hypothetical protein predicted by genemark.hmm; supported by full-length cDNA: Ceres: 19486.                                                         | 260875_at   | 1.9 |
| MYB-related protein identical to GB: CAA90748 GI: 1263093 from [Arabidopsis thaliana]                                                                | 260784_at   | 1.9 |
| unknown protein ; supported by full-length cDNA: Ceres: 18355.                                                                                       | 259342_at   | 1.9 |
| unknown protein similar to HYP1 GB: CAA55187 from [Arabidopsis thaliana]                                                                             | 259318_at   | 1.9 |
| unknown protein similar to possible apospory-associated protein C GB: Q40784 [Pennisetum ciliare]; supported by full-length cDNA: Ceres: 411;        | 259186_at   | 1.9 |
| putative serine carboxypeptidase precursor identical to serine carboxypeptidase precursor GB: P32826 [Arabidopsis thaliana] up to residue 51         | 258970_at   | 1.9 |
| putative ATPase (ISW2-like) similar to ISW2 (ATPase component of a two subunit chromatin remodeling complex) GB: 6324879 [Saccharom]                 | 258904_at   | 1.9 |
| unknown protein ; supported by cDNA: gi_15292900_gb_AY050884.1_                                                                                      | 258838_at   | 1.9 |
| unknown protein contains Pfam profiles: PF00036 EF hand (2 copies); supported by cDNA: gi_14334439_gb_AY034911.1_                                    | 257677_at   | 1.9 |
| DNA-binding protein, putative similar to GB: AAF32491 from [Triticum aestivum] (Mol. Cell. Biol. 19 (12), 8113-8122 (1999))                          | 257291_at   | 1.9 |
| dem-like protein similar to dem GB: CAA73973 from [Lycopersicon esculentum] (Plant Cell (1998) 10, 1-12)                                             | 257029_at   | 1.9 |
| DREB2B transcription factor identical to dehydration response element binding transcription factor DREB2B GB: BAA33795 [Arabidopsis thali]           | 256430_at   | 1.9 |
| DnaJ protein, putative contains Pfam profile: PF00226: DnaJ domain; supported by full-length cDNA: Ceres: 25796.                                     | 256221_at   | 1.9 |
| putative zinc finger protein                                                                                                                         | 255094_at   | 1.9 |
| putative protein hypothetical protein, Synechocystis sp., PIR2: S76637                                                                               | 254715_at   | 1.9 |
| putative protein ARI protein, Drosophila melanogaster, X98309; supported by cDNA: gi_15292860_gb_AY050864.1_                                         | 253236_at   | 1.9 |
| putative protein phospholipase D, Arabidopsis thaliana, gb: U84568; supported by cDNA: gi_11761141_dbj_AB031047.1_AB031047                           | 253120_at   | 1.9 |
| hypothetical protein                                                                                                                                 | 252400_at   | 1.9 |
| putative protein predicted proteins, Arabidopsis thaliana; supported by full-length cDNA: Ceres: 106702.                                             | 251896_at   | 1.9 |
| RING finger - like protein DNA-binding Mel-18 protein, Homo sapiens, PIR: JN0717 supported by full-length cDNA: Ceres: 20931.                        | 251897_at   | 1.9 |
| Sar1-like GTP binding protein small GTP-binding protein Bsar1a - Brassica campestris, EMBL: U55035                                                   | 251217_at   | 1.9 |
| putative protein similar to unknown protein (pir) T01270)                                                                                            | 250742_at   | 1.9 |
| putative protein similar to unknown protein (gb AAF23188.1)                                                                                          | 250728_at   | 1.9 |
| putative protein hypothetical bacterial proteins                                                                                                     | 250570_at   | 1.9 |
| putative protein similar to unknown protein (sp P37707); supported by full-length cDNA: Ceres: 6903.                                                 | 249237_at   | 1.9 |
| unknown protein                                                                                                                                      | 249134_at   | 1.9 |
| putative protein contains similarity to G-box binding factor; supported by full-length cDNA: Ceres: 25211.                                           | 249074_at   | 1.9 |



|                                                                                                                                                   |             |     |
|---------------------------------------------------------------------------------------------------------------------------------------------------|-------------|-----|
| putative protein contains similarity to RNA-binding protein;supported by full-length cDNA: Ceres:265530.                                          | 248869_at   | 1.9 |
| DnaJ protein-like ;supported by full-length cDNA: Ceres:14006.                                                                                    | 248739_at   | 1.9 |
| putative protein contains similarity to 5 -nucleotidase                                                                                           | 248628_at   | 1.9 |
| putative protein similar to unknown protein (pir  T09559); supported by cDNA: gi_15810212_gb_AY056121.1_                                          | 248310_at   | 1.9 |
| unknown protein ;supported by full-length cDNA: Ceres:114955.                                                                                     | 248299_at   | 1.9 |
| putative protein contains similarity to nuclear movement protein nudC;supported by full-length cDNA: Ceres:38105.                                 | 248258_at   | 1.9 |
| putative protein similar to unknown protein (emb CAB76911.1)                                                                                      | 247938_at   | 1.9 |
| plasma membrane ATPase 3 (proton pump) (sp P20431) ; supported by cDNA: gi_15982712_gb_AY056780.1_                                                | 247902_at   | 1.9 |
| SKP1 interacting partner 1 (SKIP1) identical to SKP1 interacting partner 1 GI:10716947 from [Arabidopsis thaliana];supported by full-length cDNA: | 247863_at   | 1.9 |
| putative protein predicted proteins, Arabidopsis thaliana; supported by cDNA: gi_15983810_gb_AY056811.1_                                          | 247590_at   | 1.9 |
| receptor-like protein kinase ; supported by cDNA: gi_16974576_gb_AY060554.1_                                                                      | 247357_at   | 1.9 |
| nuclear protein-like                                                                                                                              | 247271_at   | 1.9 |
| poly(A)-binding protein II-like ; supported by cDNA: gi_14423493_gb_AF386984.1_AF386984                                                           | 247173_at   | 1.9 |
| putative protein auxin-independent growth promoter - Nicotiana tabacum, PIR:A44226                                                                | 246516_at   | 1.9 |
| 14-3-3 protein GF14upsilon (grf5) identical to 14-3-3 protein GF14 upsilon GI:2232148 from [Arabidopsis thaliana] ; supported by cDNA: gi_14      | 246489_at   | 1.9 |
| hypothetical protein                                                                                                                              | 246232_at   | 1.9 |
| heat shock transcription factor HSF4 ; supported by cDNA: gi_1619920_gb_U68017.1_ATU68017                                                         | 246214_at   | 1.9 |
| aminopeptidase-like protein ; supported by cDNA: gi_13430673_gb_AF360249.1_AF360249                                                               | 246219_at   | 1.9 |
| polyubiquitin (UBQ4) identical to GI:17677                                                                                                        | 245989_s_at | 1.9 |
| putative protein protein phosphatase-1 regulatory subunit 7 alpha2 - Homo sapiens, EMBL:AF067136;supported by full-length cDNA: Ceres:.           | 245938_at   | 1.9 |
| putative protein ;supported by full-length cDNA: Ceres:29990.                                                                                     | 245699_at   | 1.9 |
| unknown protein                                                                                                                                   | 245678_at   | 1.9 |
| putative protein                                                                                                                                  | 245418_at   | 1.9 |
| Expressed protein ; supported by cDNA: gi_5764394_gb_AF159587.1_AF159587                                                                          | 245256_at   | 1.9 |
| putative Na <sup>+</sup> /Ca <sup>2+</sup> antiporter ; supported by cDNA: gi_6492236_gb_AF109178.1_AF109178                                      | 245127_at   | 1.9 |
| unknown protein                                                                                                                                   | 266652_at   | 1.8 |
| hypothetical protein                                                                                                                              | 265227_s_at | 1.8 |
| putative phytochrome A similar to GB:AAA21351; supported by cDNA: gi_14517371_gb_AY039520.1_                                                      | 264508_at   | 1.8 |
| unknown protein ;supported by full-length cDNA: Ceres:93312.                                                                                      | 262607_at   | 1.8 |
| hypothetical protein predicted by genemark.hmm                                                                                                    | 262407_at   | 1.8 |
| xylosidase, putative similar to xylosidase GI:2102655 from [Aspergillus niger]                                                                    | 262181_at   | 1.8 |
| hypothetical protein predicted by genemark.hmm                                                                                                    | 262130_at   | 1.8 |
| hypothetical protein contains similarity to spliceosome associated protein SAP 145 GI:1173904 from [Homo sapiens]                                 | 261872_s_at | 1.8 |
| abscisic acid responsive elements-binding factor identical to abscisic acid responsive elements-binding factor GB:AAF27179 GI:6739274 from        | 261613_at   | 1.8 |
| unknown protein ;supported by full-length cDNA: Ceres:6937.                                                                                       | 261485_at   | 1.8 |
| protein kinase, putative (fragment) similar to GB:BAA94509 from [Populus nigra]                                                                   | 261436_at   | 1.8 |
| protein kinase, putative similar to many predicted protein kinases                                                                                | 261368_at   | 1.8 |
| putative GTP-binding protein similar to NGP-1 GB:Q13823 from (Homo sapiens)                                                                       | 261314_at   | 1.8 |
| unknown protein                                                                                                                                   | 261064_at   | 1.8 |
| hypothetical protein predicted by genemark.hmm                                                                                                    | 261086_at   | 1.8 |
| RING finger protein, putative similar to GB:BAA78677 from [Homo sapiens]                                                                          | 260690_at   | 1.8 |
| unknown protein                                                                                                                                   | 260273_at   | 1.8 |
| hypothetical protein similar to hypothetical proteins: GB:AAD21751, GB:AAC33230 [Arabidopsis thaliana]                                            | 260262_at   | 1.8 |
| unknown protein ;supported by full-length cDNA: Ceres:270659.                                                                                     | 260025_at   | 1.8 |
| nucellin-like protein similar to nucellin GB:AAB96882 [Hordeum vulgare] (nucellin: similar to aspartic protease and its specific expression in nu | 259733_at   | 1.8 |
| CONSTANS family zinc finger protein, putative contains Pfam profile: PF01760: CONSTANS family zinc finger; supported by cDNA: gi_1433:            | 259595_at   | 1.8 |
| hypothetical protein                                                                                                                              | 259534_at   | 1.8 |
| protein phosphatase 2C (PP2C) identical to protein phosphatase 2C (PP2C) GB:P49598 [Arabidopsis thaliana]                                         | 259231_at   | 1.8 |
| unknown protein similar to hypothetical protein GB:AAC23643 [Arabidopsis thaliana]                                                                | 259232_at   | 1.8 |
| unknown protein similar to hypothetical proteins GB:P73627, GB:Q55884, GB:P73121 [Synechocystis sp.]; supported by full-length cDNA: C:           | 259226_at   | 1.8 |
| unknown protein similar to CGI-86 protein GB:AAD34081 [Homo sapiens], HMM hit: Alcohol/other dehydrogenases, short chain type                     | 259051_at   | 1.8 |
| putative glucose acyltransferase similar to glucose acyltransferase GB:AAD01263 [Solanum berthaultii]; also similar to serine carboxypeptida:     | 258923_at   | 1.8 |
| putative O-linked GlcNAc transferase similar to O-linked GlcNAc transferase GB:AAB63465 [Caenorhabditis elegans]                                  | 258575_at   | 1.8 |
| cytochrome P450, putative similar to cytochrome P450 GB:O65784 [Arabidopsis thaliana]; supported by full-length cDNA: Ceres: 262802.              | 257634_s_at | 1.8 |
| chaperonin, putative similar to CHAPERONIN CPN60-2, MITOCHONDRIAL PRECURSOR GB:Q05046 from [Cucurbita maxima];supported t                         | 257608_at   | 1.8 |
| 9-cis-epoxycarotenoid dioxygenase, putative similar to 9-cis-epoxycarotenoid dioxygenase GB:AAF26356 [Phaseolus vulgaris]; supported b            | 257280_at   | 1.8 |
| RNA-binding protein, putative contains Pfam profile: PF00806 Pumilio-family RNA binding domains (aka PUM-HD, Pumilio homology domain              | 257122_at   | 1.8 |
| putative 3-hydroxybutyryl-CoA dehydrogenase similar to 3-HYDROXYBUTYRYL-COA DEHYDROGENASE GB:Q45223 from [Bradyrhizobium                          | 257052_at   | 1.8 |
| unknown protein ; supported by cDNA: gi_14334837_gb_AY035092.1_                                                                                   | 256310_at   | 1.8 |
| hypothetical protein predicted by genscan+                                                                                                        | 256089_at   | 1.8 |
| amino acid permease I identical to amino acid permease I GI:22641 from [Arabidopsis thaliana]; supported by cDNA: gi_404018_gb_L16240.            | 256022_at   | 1.8 |
| hypothetical protein contains Pfam profile: PF00612 IQ calmodulin-binding motif                                                                   | 255783_at   | 1.8 |
| cathepsin B-like cysteine protease, putative similar to cathepsin B-like cysteine proteinase GI:609175 from [Nicotiana rustica]; contains an un   | 255590_at   | 1.8 |
| polycomb group - like protein similar to A. thaliana homeotic protein curlyleaf, GenBank accession number Y10580; supported by cDNA: gi_4         | 255510_at   | 1.8 |
| putative ribosomal protein L19 similar to L19 from several species; supported by cDNA: gi_14423511_gb_AF386993.1_AF386993                         | 255520_at   | 1.8 |
| coded for by A. thaliana cDNA T75804 similar to ATPases associated with various cellular activities (Pfam: AAA.hmm, score: 230.91)                | 255474_at   | 1.8 |
| putative pre-mRNA splicing factor similar to yeast pre-mRNA splicing factors; supported by cDNA: gi_16604550_gb_AY059720.1_                       | 255382_at   | 1.8 |
| putative ABC transporter similar to Guillardia theta ABC transporter, GenBank accession number AF041468; supported by cDNA: gi_155291             | 255305_at   | 1.8 |
| UV-damaged DNA binding factor - like protein XPE UV-damaged DNA binding factor, Mus musculus, BAA84699                                            | 255226_at   | 1.8 |
| putative protein anthocyanin rhamnosyltransferase -Petunia x hybrida, PID:g454253                                                                 | 255032_at   | 1.8 |
| putative protein hypothetical protein F7H19.70 - Arabidopsis thaliana, PID:e1310057                                                               | 254848_at   | 1.8 |
| putative protein ; supported by cDNA: gi_16323185_gb_AY057697.1_                                                                                  | 254764_at   | 1.8 |
| potassium channel protein AKT3 ; supported by cDNA: gi_1100897_gb_U40154.1_ATU40154                                                               | 254305_at   | 1.8 |
| putative serine/threonine kinase MAP3K delta-1 protein kinase, Arabidopsis thaliana,PID:g2253010; supported by cDNA: gi_15810436_gb_A             | 254269_at   | 1.8 |
| transcriptional activator CBF1-like protein strong similarity to transcriptional activator CBF1, Arabidopsis thaliana00                           | 254066_at   | 1.8 |
| protein phosphatase ABI1 ; supported by cDNA: gi_14334799_gb_AY035073.1_                                                                          | 253994_at   | 1.8 |
| AIM1 protein ; supported by cDNA: gi_16648890_gb_AY059815.1_                                                                                      | 253759_at   | 1.8 |
| protein phosphatase 2C - like protein protein phosphatase 2C, Schizosaccharomyces pombe, PIR2:S54297; supported by cDNA: gi_162096:               | 253453_at   | 1.8 |
| putative protein kinase protein kinase, Spinacia oleracea, PIR2:S42867                                                                            | 253359_at   | 1.8 |
| arginine decarboxylase SPE2 ; supported by cDNA: gi_14517491_gb_AY039581.1_                                                                       | 253203_at   | 1.8 |
| putative protein crp1-hcf111 allele,encoding a chloroplast protein -Zea mays,PID:g3289002                                                         | 253019_at   | 1.8 |
| putative protein                                                                                                                                  | 252990_at   | 1.8 |
| putative protein proline-rich protein A41R, Chloroella virus PBCV-1, PIR:T17531;supported by full-length cDNA: Ceres:27481.                       | 251550_at   | 1.8 |

|                                                                                                                                                 |             |     |
|-------------------------------------------------------------------------------------------------------------------------------------------------|-------------|-----|
| ribonuclease II-like protein ribonuclease II family protein, Deinococcus radiodurans, PIR:C75571                                                | 251040_at   | 1.8 |
| polyubiquitin (UBQ3) identical to GI:928809; supported by full-length cDNA: Ceres: 20908.                                                       | 250935_at   | 1.8 |
| putative protein strong similarity to unknown protein (emb CAB87679.1)                                                                          | 250326_at   | 1.8 |
| putative protein similar to unknown protein (emb CAB69839.1)                                                                                    | 250257_at   | 1.8 |
| putative protein similar to unknown protein (pir S77419); supported by cDNA: gi_15912216_gb_AY056386.1_                                         | 250259_at   | 1.8 |
| disease resistance protein-like non-consensus TT donor splice site at exon 1                                                                    | 249320_at   | 1.8 |
| N-carbamyl-L-amino acid amidohydrolase-like protein                                                                                             | 249103_at   | 1.8 |
| WD-repeat protein-like                                                                                                                          | 249066_at   | 1.8 |
| ornithine aminotransferase                                                                                                                      | 248879_at   | 1.8 |
| ATP-dependent Clp protease ATP-binding subunit (ClpC1) almost identical to ClpC GI:2921158 from [Arabidopsis thaliana]                          | 248480_at   | 1.8 |
| putative protein similar to unknown protein (pir S42136)                                                                                        | 248357_at   | 1.8 |
| FtsH protease, putative similar to ATP-dependent metalloprotease FtsH1 GI:3600100 from [Mus musculus]                                           | 248303_at   | 1.8 |
| unknown protein ;supported by full-length cDNA: Ceres:21044.                                                                                    | 247990_at   | 1.8 |
| putative protein ;supported by full-length cDNA: Ceres:3086.                                                                                    | 247748_at   | 1.8 |
| putative protein gcpE protein, Chlamydia muridarum, PIR:C81715                                                                                  | 247637_at   | 1.8 |
| pseudo-response regulator 1 ; supported by cDNA: gi_7576353_dbj_AB041530.1_AB041530                                                             | 247525_at   | 1.8 |
| autophagocytosis protein - like autophagocytosis protein AUT1, Saccharomyces cerevisiae, PIR:S45130;supported by full-length cDNA: Cere         | 247542_at   | 1.8 |
| putative protein predicted protein, Arabidopsis thaliana                                                                                        | 247487_at   | 1.8 |
| putative protein embryo-specific protein 3, Arabidopsis thaliana, PIR:T48490                                                                    | 247459_at   | 1.8 |
| non-phototropic hypocotyl 3 (gb AAF05914.1) ; supported by cDNA: gi_6224711_gb_AF180390.1_AF180390                                              | 247288_at   | 1.8 |
| unknown protein                                                                                                                                 | 246957_at   | 1.8 |
| transcription factor-like protein light-induced protein CPRF-2 - Petroselinum crispum, PIR:S16321                                               | 246962_s_at | 1.8 |
| putative protein predicted protein, Oryza sativa                                                                                                | 246892_at   | 1.8 |
| putative protein pyruvate water dikinase, Archaeoglobus fulgidus, PIR:F69338                                                                    | 246829_at   | 1.8 |
| protein phosphatase - like protein phosphatase-2C, Mesembryanthemum crystallinum, EMBL:AF075581;supported by full-length cDNA: Cere             | 246756_at   | 1.8 |
| Carboxylesterase-like protein sterol esterase - Rattus norvegicus, EMBL:Z22803                                                                  | 246524_at   | 1.8 |
| putative protein                                                                                                                                | 246343_at   | 1.8 |
| putative protein predicted protein, Drosophila melanogaster                                                                                     | 246139_at   | 1.8 |
| calcium-dependent protein kinase ; supported by cDNA: gi_836941_gb_U20624.1_ATU20624                                                            | 246044_at   | 1.8 |
| hypothetical protein similar to hypothetical protein GB:CAB77775 GI:7269775 from [Arabidopsis thaliana]                                         | 245789_at   | 1.8 |
| hypothetical protein                                                                                                                            | 245477_at   | 1.8 |
| apetala2 domain TINY like protein                                                                                                               | 245445_at   | 1.8 |
| HSP like protein ; supported by cDNA: gi_15293148_gb_AY051008.1_                                                                                | 245293_at   | 1.8 |
| putative protein similarity to proteins of unknown function from human and mouse                                                                | 245180_at   | 1.8 |
| hypothetical protein                                                                                                                            | 244904_at   | 1.8 |
| NADH dehydrogenase subunit 3 Protein sequence is in conflict with the conceptual translation                                                    | 244920_s_at | 1.8 |
| hypothetical protein                                                                                                                            | 257318_at   | 1.8 |
| putative salt-inducible protein                                                                                                                 | 257395_at   | 1.8 |
| putative kinesin heavy chain                                                                                                                    | 263751_at   | 1.7 |
| unknown protein highly similar to T21L14.19; similar to GP 2191153 AF007269 and GP 2252859 AF013294                                             | 267644_s_at | 1.7 |
| unknown protein ; supported by cDNA: gi_15293114_gb_AY050991.1_                                                                                 | 267602_at   | 1.7 |
| putative DNA binding protein ; supported by cDNA: gi_11908071_gb_AF326883.1_AF326883                                                            | 267538_at   | 1.7 |
| unknown protein                                                                                                                                 | 266839_at   | 1.7 |
| putative zinc transporter ;supported by full-length cDNA: Ceres:207558.                                                                         | 266718_at   | 1.7 |
| putative helicase ; supported by cDNA: gi_15027926_gb_AY045820.1_                                                                               | 266679_at   | 1.7 |
| putative phospholipid cytidylyltransferase                                                                                                      | 266359_at   | 1.7 |
| putative pumilio/Mpt5 family RNA-binding protein                                                                                                | 266284_at   | 1.7 |
| unknown protein                                                                                                                                 | 266185_at   | 1.7 |
| contains similarity to S. cerevisiae ADR1 gene (PID:g924931) ; supported by cDNA: gi_13605528_gb_AF361590.1_AF361590                            | 265908_at   | 1.7 |
| unknown protein predicted by genscan; supported by cDNA: gi_16930416_gb_AF419562.1_AF419562                                                     | 265664_at   | 1.7 |
| unknown protein                                                                                                                                 | 265139_at   | 1.7 |
| alcohol dehydrogenase identical to alcohol dehydrogenase GI:469467 from (Arabidopsis thaliana); supported by full-length cDNA: Ceres: 403       | 264953_at   | 1.7 |
| putative DNA-binding protein, Myb Identical to A. thaliana Myb-like protein (gb D58424); supported by cDNA: gi_1747309_dbj_D58424.1_D5          | 264709_at   | 1.7 |
| hypothetical protein predicted by genefinder                                                                                                    | 264618_at   | 1.7 |
| putative aspartic proteinase similar to GB:AAC49730;supported by full-length cDNA: Ceres:8972.                                                  | 264344_at   | 1.7 |
| hypothetical protein contains non-consensus donor splice site AT at exon 4 and acceptor splice site at exon5;Contains similarity to serine/thre | 264331_at   | 1.7 |
| starch branching enzyme II                                                                                                                      | 263912_at   | 1.7 |
| putative tetracycline transporter protein                                                                                                       | 263574_at   | 1.7 |
| unknown protein                                                                                                                                 | 263545_at   | 1.7 |
| unknown protein ;supported by full-length cDNA: Ceres:31655.                                                                                    | 263517_at   | 1.7 |
| cold-regulated protein cor15a precursor ; supported by cDNA: gi_14532457_gb_AY039853.1_                                                         | 263497_at   | 1.7 |
| hypothetical protein                                                                                                                            | 263503_s_at | 1.7 |
| putative RING zinc finger protein ; supported by cDNA: gi_13265496_gb_AF324691.2_AF324691                                                       | 263325_at   | 1.7 |
| putative glutamate/aspartate-binding peptide Belongs to the PF 01027 Uncharacterized protein family UPF0005 with 7 transmembrane domai          | 263164_at   | 1.7 |
| unknown protein ESTs gb R30529, gb Z48463, gb Z48467, gb AA597369 and gb AA394772 come from this gene; supported by cDNA: gi_16                 | 262574_at   | 1.7 |
| alanine--tRNA ligase, putative similar to alanine--tRNA ligase GB:S32671 from [Arabidopsis thaliana]                                            | 262468_at   | 1.7 |
| endoplasmic reticulum-type calcium-transporting ATPase 4 identical to GB:AAD29957 from [Arabidopsis thaliana] (Plant Physiol. 120 (1999) I      | 261433_s_at | 1.7 |
| ribokinase, putative similar to GB:AAD00536 from [Pyrobaculum aerophilum]                                                                       | 261136_at   | 1.7 |
| transcription factor scarecrow-like 14, putative similar to GB:AAD24412 from [Arabidopsis thaliana] (Plant J. 18 (1), 111-119 (1999))           | 261062_at   | 1.7 |
| unknown protein ;supported by full-length cDNA: Ceres:114093.                                                                                   | 260793_at   | 1.7 |
| hypothetical protein predicted by genemark.hmm                                                                                                  | 260647_at   | 1.7 |
| unknown protein contains similarity to tub homolog GI:2072160 from [Homo sapiens]; supported by cDNA: gi_13877766_gb_AF370146.1_AF              | 260588_at   | 1.7 |
| unknown protein                                                                                                                                 | 260580_at   | 1.7 |
| unknown protein ;supported by full-length cDNA: Ceres:27109.                                                                                    | 260444_at   | 1.7 |
| putative carnitine/acylcarnitine translocase similar to carnitine/acylcarnitine translocase GB:CAB55356 [Homo sapiens];supported by full-lengt  | 260163_at   | 1.7 |
| hypothetical protein predicted by genscan                                                                                                       | 260087_at   | 1.7 |
| unknown protein                                                                                                                                 | 259934_at   | 1.7 |
| myb-related transcription factor (cpm10), putative similar to myb-related transcription factor (cpm10) GB:U33915 GI:1002795 from [Craterosti    | 259618_at   | 1.7 |
| unknown protein predicted by genefinder, multiple est matches;supported by full-length cDNA: Ceres:7073.                                        | 258939_at   | 1.7 |
| unknown protein ;supported by full-length cDNA: Ceres:13305.                                                                                    | 258455_at   | 1.7 |
| PP1/PP2A phosphatases pleiotropic regulator PRL2 identical to GB:Q39190 from [Arabidopsis thaliana]; supported by cDNA: gi_15809827_g           | 258380_at   | 1.7 |
| protein kinase, putative similar to serine/threonine protein kinase GB:NP_032667 from [Mus musculus]                                            | 258186_s_at | 1.7 |
| unknown protein ; supported by cDNA: gi_14423467_gb_AF386971.1_AF386971                                                                         | 258154_at   | 1.7 |

|                                                                                                                                                |             |     |
|------------------------------------------------------------------------------------------------------------------------------------------------|-------------|-----|
| unknown protein ;supported by full-length cDNA: Ceres:124193.                                                                                  | 257672_at   | 1.7 |
| unknown protein ; supported by cDNA: gi_15146182_gb_AY049232.1_                                                                                | 257154_at   | 1.7 |
| unknown protein                                                                                                                                | 257092_at   | 1.7 |
| HAPP48,5 protein identical to HAPp48,5 GB:Y09562 [Arabidopsis thaliana]                                                                        | 256902_s_at | 1.7 |
| unknown protein ;supported by full-length cDNA: Ceres:3056.                                                                                    | 256441_at   | 1.7 |
| deoxyguanosine kinase, putative similar to deoxyguanosine kinase [Homo sapiens] GI:1480198;supported by full-length cDNA: Ceres:3878.          | 256341_at   | 1.7 |
| hypothetical protein predicted by genemark.hmm                                                                                                 | 255929_at   | 1.7 |
| AtKAP alpha similar to AtKAP, GenBank accession number U69533; supported by cDNA: gi_14326480_gb_AF385693.1_AF385693                           | 255507_at   | 1.7 |
| ferredoxin--NADP+ reductase - like protein ferredoxin--NADP+ reductase, Pisum sativum, PIR:T06773;supported by full-length cDNA: Ceres:        | 255230_at   | 1.7 |
| putative translation initiation factor IF-2 translation initiation factor IF-2 - Haemophilus influenzae, PIR2:E64114                           | 254904_at   | 1.7 |
| putative protein tripeptidyl-peptidase II, Homo sapiens, Pir:S54376                                                                            | 254433_at   | 1.7 |
| putative protein predicted protein, Arabidopsis thaliana, PATCHX:G2494119;supported by full-length cDNA: Ceres:106883.                         | 254427_at   | 1.7 |
| putative beta-glucosidase beta-glucosidase BGQ60 precursor - barley, PIR2:A57512; supported by cDNA: gi_15982821_gb_AY057518.1_                | 253841_at   | 1.7 |
| Expressed protein ; supported by cDNA: gi_13358221_gb_AF325032.2_AF325032                                                                      | 253293_at   | 1.7 |
| putative protein predicted protein, Arabidopsis thaliana; supported by cDNA: gi_15451175_gb_AY054668.1_                                        | 253062_at   | 1.7 |
| cinnamyl alcohol dehydrogenase -like protein, LCADa                                                                                            | 253017_at   | 1.7 |
| putative protein unknown mRNA, Homo sapiens, AF091072                                                                                          | 252968_at   | 1.7 |
| carboxypeptidase precursor-like protein carboxypeptidase Y-like protein, Arabidopsis thaliana, EMBL:M81130; supported by cDNA: gi_152115       | 252606_at   | 1.7 |
| putative protein several hypothetical proteins                                                                                                 | 252496_at   | 1.7 |
| putative protein predicted proteins, Arabidopsis thaliana; supported by cDNA: gi_14532663_gb_AY039956.1_                                       | 252467_at   | 1.7 |
| putative protein probable transcription regulator protein - Sorghum bicolor,PIR2:T03446;supported by full-length cDNA: Ceres:34151.            | 252323_at   | 1.7 |
| hypothetical protein ; supported by cDNA: gi_13877826_gb_AF370176.1_AF370176                                                                   | 251964_at   | 1.7 |
| fructokinase - like protein fructokinase, Lycopersicon esculentum, EMBL:LEU62329                                                               | 251935_at   | 1.7 |
| putative protein arm repeat containing protein, Brassica napus, AF024625                                                                       | 251862_at   | 1.7 |
| putative protein hypothetical proteins - Arabidopsis thaliana; supported by cDNA: gi_14334587_gb_AY034967.1_                                   | 251356_at   | 1.7 |
| neoxanthin cleavage enzyme nc1                                                                                                                 | 251146_at   | 1.7 |
| putative protein predicted protein, Arabidopsis thaliana                                                                                       | 250877_at   | 1.7 |
| signal recognition particle 54CP protein precursor ; supported by cDNA: gi_15293130_gb_AY050999.1_                                             | 250884_at   | 1.7 |
| DnaJ-like protein ; supported by cDNA: gi_15810414_gb_AY056246.1_                                                                              | 250755_at   | 1.7 |
| putative protein contains similarity to zinc finger protein;supported by full-length cDNA: Ceres:3542.                                         | 250736_s_at | 1.7 |
| serine/threonine-protein kinase                                                                                                                | 250527_at   | 1.7 |
| putative protein predicted proteins, Arabidopsis thaliana and Drosophila melanogaster                                                          | 250516_at   | 1.7 |
| putative protein unnamed ORF cDNA FLJ10872, Homo sapiens, EMBL:AK001734; supported by cDNA: gi_14532679_gb_AY039964.1_                         | 250402_at   | 1.7 |
| transporter-like protein ;supported by full-length cDNA: Ceres:27439.                                                                          | 250252_at   | 1.7 |
| unknown protein                                                                                                                                | 250104_at   | 1.7 |
| ankyrin repeat protein EMB506 ; supported by cDNA: gi_5911311_gb_AF026167.1_AF026167                                                           | 249404_at   | 1.7 |
| putative protein contains similarity to unknown protein (dbj)BAA76827.1); supported by cDNA: gi_14532601_gb_AY039925.1_                        | 249181_at   | 1.7 |
| putative protein similar to unknown protein (gb)AAD20092.1)                                                                                    | 248668_at   | 1.7 |
| pyrophosphate-dependent phosphofructo-1-kinase-like protein ; supported by cDNA: gi_14532861_gb_AY040055.1_                                    | 247983_at   | 1.7 |
| putative protein predicted proteins, Homo sapiens and Drosophila melanogaster                                                                  | 247847_at   | 1.7 |
| serine/threonine protein kinase ; supported by cDNA: gi_13249118_gb_AF295665.1_AF295665                                                        | 247820_at   | 1.7 |
| quinone oxidoreductase - like protein quinone oxidoreductase homolog, Vigna unguiculata, PIR:T11672;supported by full-length cDNA: Cere:       | 247513_at   | 1.7 |
| calnexin - like protein calnexin homolog, Arabidopsis thaliana, EMBL:AT08315;supported by full-length cDNA: Ceres:2869.                        | 247494_at   | 1.7 |
| ABC transporter protein 1-like ; supported by cDNA: gi_15912314_gb_AY056435.1_                                                                 | 247222_at   | 1.7 |
| putative protein strong similarity to unknown protein (pir)T04718); supported by cDNA: gi_15529177_gb_AY052213.1_                              | 247013_at   | 1.7 |
| RuvB DNA helicase-like protein ; supported by cDNA: gi_16974567_gb_AY061754.1_                                                                 | 247014_at   | 1.7 |
| RING finger-like protein RING-H2 finger protein RHG1a - Arabidopsis thaliana, EMBL:AF079183                                                    | 246968_at   | 1.7 |
| putative protein GTP-binding proteins at the N-terminus                                                                                        | 246775_at   | 1.7 |
| splicing factor-like protein                                                                                                                   | 246257_at   | 1.7 |
| putative protein HCNP, Homo sapiens, EMBL:AF226051                                                                                             | 245917_at   | 1.7 |
| sucrose-phosphate synthase -like protein sucrose-phosphate synthase isoform 1, Citrus unshiu, PIR:S72648                                       | 245904_at   | 1.7 |
| hypothetical protein similar to putative ubiquitin GI:4415931 from [Arabidopsis thaliana]; supported by cDNA: gi_14334681_gb_AY035014.1_       | 245821_at   | 1.7 |
| hypothetical protein predicted by genemark.hmm                                                                                                 | 245659_at   | 1.7 |
| putative phosphatidylinositol-4-phosphate 5-kinase ; supported by cDNA: gi_13925628_gb_AF260903.1_AF260903                                     | 267081_at   | 1.7 |
| putative protein strong similarity to unknown protein (pir)T05518)                                                                             | 248495_at   | 1.7 |
| putative protein similar to unknown protein (emb)CAB51351.1)                                                                                   | 250309_at   | 1.6 |
| hypothetical protein envelope-like, Glycine max., PIR:T08898                                                                                   | 252700_at   | 1.6 |
| similar to late embryogenesis abundant proteins ; supported by cDNA: gi_14423503_gb_AF386989.1_AF386989                                        | 267263_at   | 1.6 |
| unknown protein ; supported by cDNA: gi_15451173_gb_AY054667.1_                                                                                | 267180_at   | 1.6 |
| putative alcohol dehydrogenase ; supported by cDNA: gi_16604706_gb_AY059798.1_                                                                 | 267181_at   | 1.6 |
| putative vacuolar sorting receptor identical to GB:U79960; contains a calcium-binding EGF-like domain signature                                | 267106_s_at | 1.6 |
| hypothetical protein The first 3 exons is identical to that of GB:AJ224957. This gene appears to be a truncated version of that in GB:AJ224957 | 266466_at   | 1.6 |
| putative elongation factor                                                                                                                     | 266407_at   | 1.6 |
| unknown protein ; supported by cDNA: gi_16604650_gb_AY059770.1_                                                                                | 266121_at   | 1.6 |
| 20S proteasome subunit (PAA2) identical to GB:AF043519; supported by cDNA: gi_15450622_gb_AY052679.1_                                          | 266036_s_at | 1.6 |
| hypothetical protein                                                                                                                           | 266042_s_at | 1.6 |
| putative senescence-associated protein 5 contains a transmembrane 4 family signature; rare (GC) splice donor consensus found instead of (C     | 265935_at   | 1.6 |
| unknown protein                                                                                                                                | 265900_at   | 1.6 |
| putative SEC1 family transport protein similar to SLY1 proteins and vesicle transport proteins; supported by cDNA: gi_15215769_gb_AY0504       | 265822_at   | 1.6 |
| putative arginine/serine-rich splicing factor                                                                                                  | 265449_at   | 1.6 |
| putative inorganic pyrophosphatase ;supported by full-length cDNA: Ceres:8068.                                                                 | 265339_at   | 1.6 |
| hypothetical protein                                                                                                                           | 265230_s_at | 1.6 |
| putative senescence-associated protein 12 ;supported by full-length cDNA: Ceres:40806.                                                         | 264787_at   | 1.6 |
| hypothetical protein similar to receptor-like protein kinase GI:7529754 from [Arabidopsis thaliana]                                            | 264479_at   | 1.6 |
| unknown protein similar to Lambda-PRL2 Arabidopsis thaliana cDNA clone GB:R30041                                                               | 264354_s_at | 1.6 |
| hypothetical protein Contains similarity to transcription initiation factor IIE, alpha subunit gb)X63468 from Homo sapiens; supported by cDNA: | 264368_at   | 1.6 |
| beta-glucosidase, putative similar to beta-glucosidase GI:5030906 from [Polygonum tinctorium]                                                  | 264270_at   | 1.6 |
| putative ABC transporter related to multi drug resistance proteins and P-glycoproteins                                                         | 263865_at   | 1.6 |
| hypothetical protein predicted by genscan                                                                                                      | 263864_at   | 1.6 |
| putative WD-40 repeat protein                                                                                                                  | 263824_at   | 1.6 |
| unknown protein similar to cell differentiation protein GB:AAC36682 from (Homo sapiens)                                                        | 263685_at   | 1.6 |
| DNA-directed RNA polymerase II, third largest subunit                                                                                          | 263564_s_at | 1.6 |
| aldehyde oxidase identical to GP:3172044:gnl:PID:d1029570:AB010080; supported by cDNA: gi_5672671_dbj_AB016622.1_AB016622                      | 263570_at   | 1.6 |

|                                                                                                                                               |             |     |
|-----------------------------------------------------------------------------------------------------------------------------------------------|-------------|-----|
| hypothetical protein                                                                                                                          | 263510_s_at | 1.6 |
| putative myo-inositol 1-phosphate synthase ; supported by cDNA: gi_15450746_gb_AY053415.1_                                                    | 263433_at   | 1.6 |
| hypothetical protein predicted by genscan and genefinder; supported by cDNA: gi_16649128_gb_AY059934.1_                                       | 263265_at   | 1.6 |
| zinc finger protein, putative similar to zinc finger protein GI:3618316 from [Oryza sativa];supported by full-length cDNA: Ceres:34830.       | 263128_at   | 1.6 |
| unknown protein similar to hypothetical protein GB:AAF27089 GI:6730668 from (Arabidopsis thaliana)                                            | 263014_at   | 1.6 |
| putative ATP-dependent RNA helicase similar to GB:AAB88651, similar to human U5 snRNP-specific 200kD protein, gi 3255965 and yeast p          | 262800_at   | 1.6 |
| unknown protein strong similarity to gb Y09533 involved in starch metabolism from Solanum tuberosum and contains a PF 01326 Pyruvate p        | 262784_at   | 1.6 |
| heat shock protein, putative contains Pfam profile: PF00011 Hsp20/alpha crystallin family;supported by full-length cDNA: Ceres:21735.         | 262629_at   | 1.6 |
| H+-transporting ATPase protein, putative similar to H+-transporting ATPase chain E GB:CAB43050 GI:4850294 from [Arabidopsis thaliana]         | 262354_at   | 1.6 |
| unknown protein Similar to gb U04299 mannosyl-oligosaccharide alpha-1,2-mannosidase from Mus musculus. ESTs gb R84145 and gb AA3              | 262299_at   | 1.6 |
| hypothetical protein predicted by genemark.hmm                                                                                                | 262238_at   | 1.6 |
| AP2 domain containing protein, putative similar to AP2 domain containing protein GI:2281649 from [Arabidopsis thaliana];supported by full-le  | 262197_at   | 1.6 |
| splicing factor Prp8, putative similar to splicing factor Prp8 GI:3661610 from [Homo sapiens]                                                 | 262068_at   | 1.6 |
| type 2 peroxiredoxin, putative similar to type 2 peroxiredoxin GI:4928472 from [Brassica rapa subsp. pekinensis];supported by full-length cDN | 261919_at   | 1.6 |
| scarecrow-like 3 identical to GB:AAD24404 GI:4580515 from [Arabidopsis thaliana] (Plant J. 18 (1), 111-119 (1999)); supported by cDNA: gi_    | 261866_at   | 1.6 |
| transcriptional regulator, putative similar to transcriptional regulator GI:4836767 from [Zea mays]                                           | 261837_s_at | 1.6 |
| ATP-dependent Clp protease proteolytic subunit (ClpR1) identical to nClpP5 GB:BAA82069 GI:5360595 from [Arabidopsis thaliana];supportec       | 261634_at   | 1.6 |
| hypothetical protein contains similarity to zinc finger protein GI:1399465 from [Cryptosporidium parvum];supported by full-length cDNA: Ceres | 261376_at   | 1.6 |
| Expressed protein ; supported by cDNA: gi_13926326_gb_AF372912.1_AF372912                                                                     | 261272_at   | 1.6 |
| hypothetical protein predicted by genemark.hmm                                                                                                | 261176_at   | 1.6 |
| hypothetical protein predicted by genemark.hmm;supported by full-length cDNA: Ceres:98874.                                                    | 261124_at   | 1.6 |
| unknown protein ;supported by full-length cDNA: Ceres:40419.                                                                                  | 261144_s_at | 1.6 |
| troponin reductase-1, putative similar to GB:L20473 from [Datura stramonium] (Proc. Natl. Acad. Sci. U.S.A. 90, 9591-9595 (1993)); support    | 261084_at   | 1.6 |
| F-box protein family contains similarity to F-box protein FBX3 GI:6103643 from [Homo sapiens]                                                 | 260949_at   | 1.6 |
| unknown protein ; supported by cDNA: gi_15450710_gb_AY052723.1_                                                                               | 260794_at   | 1.6 |
| hypothetical protein contains similarity to guanine nucleotide exchange factor, eIF-2B, delta subunit GI:529428 from [Mus musculus]           | 260756_at   | 1.6 |
| hypothetical protein identical to hypothetical protein GB:AAF81322 GI:8920600 from (Arabidopsis thaliana)                                     | 260700_at   | 1.6 |
| glyoxalase I, putative similar to GB:Y13239 from [Brassica juncea] (Plant J. 17 (4), 385-395 (1999))                                          | 260619_at   | 1.6 |
| unknown protein similar to putative cytoskeletal protein GI:1732517 from [Arabidopsis thaliana]; supported by cDNA: gi_1732516_gb_U62745      | 260638_at   | 1.6 |
| hypothetical protein predicted by genscan+, contains Viral RNA helicase domain                                                                | 260283_at   | 1.6 |
| putative heat shock protein similar to GB:CAB03279 from [Caenorhabditis elegans]                                                              | 260251_at   | 1.6 |
| putative SET protein, phosphatase 2A inhibitor similar to SET protein, phosphatase 2A inhibitor GB:Q01105 [Homo sapiens] (role in the mechar  | 260235_at   | 1.6 |
| putative ATPase contains Pfam profile: PF00004 ATPases associated with various cellular activities (AAA)                                      | 260089_at   | 1.6 |
| putative serine/threonine-protein kinase similar to SERINE/THREONINE-PROTEIN KINASE ASK1 GB:P43291 from [Arabidopsis thaliana];su             | 259724_at   | 1.6 |
| hypothetical protein ; supported by cDNA: gi_13937176_gb_AF372942.1_AF372942                                                                  | 259545_at   | 1.6 |
| hypothetical protein ; supported by cDNA: gi_15081631_gb_AY048208.1_                                                                          | 259516_at   | 1.6 |
| Expressed protein ; supported by cDNA: gi_14532525_gb_AY039887.1_                                                                             | 259416_at   | 1.6 |
| beta-glucosidase identical to beta-glucosidase GB:AAC31962 [Arabidopsis thaliana]; supported by cDNA: gi_3420934_gb_AF082157.1_AF08           | 259173_at   | 1.6 |
| unknown protein                                                                                                                               | 259047_at   | 1.6 |
| putative uridylylate kinase similar to uridylylate kinase GB:CAB13524 [Bacillus subtilis], GB:P74457 [Synechocystis PCC6803]; supported by cD | 258885_at   | 1.6 |
| putative exportin1 (XPO1) protein similar to GB:CAB56597                                                                                      | 258868_at   | 1.6 |
| putative RNA helicase similar to RNA helicase involved in rRNA processing GB:6321267 from [Saccharomyces cerevisiae]c, ontains DEAD e         | 258701_at   | 1.6 |
| unknown protein                                                                                                                               | 258635_at   | 1.6 |
| unknown protein ;supported by full-length cDNA: Ceres:39933.                                                                                  | 258348_at   | 1.6 |
| putative casein kinase I similar to casein kinase I GB:CAA55396 from [Arabidopsis thaliana]; supported by cDNA: gi_15809823_gb_AY05417        | 258300_at   | 1.6 |
| acid phosphatase type 5 identical to GB:CAB63938 from [Arabidopsis thaliana];supported by full-length cDNA: Ceres:113666.                     | 258158_at   | 1.6 |
| putative myc-like DNA-binding protein similar to GB:AAB72192 from [Arabidopsis thaliana]                                                      | 257990_at   | 1.6 |
| unknown protein ; supported by full-length cDNA: Ceres:34773.                                                                                 | 257789_at   | 1.6 |
| cytochrome P450, putative contains Pfam profile: PF00067 cytochrome P450                                                                      | 257628_at   | 1.6 |
| ubiquitin-specific protease 14 (UBP14), putative similar to ubiquitin-specific protease 14 GI:11993473 [Arabidopsis thaliana]                 | 257085_at   | 1.6 |
| GTPase, putative contains Pfam profile: PF01926 GTPase of unknown function                                                                    | 256274_at   | 1.6 |
| hypothetical protein predicted by genemark.hmm                                                                                                | 256208_at   | 1.6 |
| putative protein                                                                                                                              | 256027_at   | 1.6 |
| hypothetical protein ;supported by full-length cDNA: Ceres:37204.                                                                             | 255980_at   | 1.6 |
| unknown protein ;supported by full-length cDNA: Ceres:23788.                                                                                  | 255957_at   | 1.6 |
| p68 RNA helicase, putative similar to p68 RNA helicase (Schizosaccharomyces pombe) GI:173419                                                  | 255749_at   | 1.6 |
| predicted OR23 protein of unknown function                                                                                                    | 255469_at   | 1.6 |
| hypothetical protein ;supported by full-length cDNA: Ceres:40589.                                                                             | 254683_at   | 1.6 |
| putative NADPH quinone oxidoreductase Pig3 Homo sapiens, PID:G2754812;supported by full-length cDNA: Ceres:4621.                              | 254393_at   | 1.6 |
| putative protein zinc finger protein, Arabidopsis thaliana, PID:g2340088; supported by cDNA: gi_15982926_gb_AY057571.1_                       | 254210_at   | 1.6 |
| putative protein ; supported by cDNA: gi_13991647_gb_AF359388.1_AF359388                                                                      | 254043_at   | 1.6 |
| hypothetical protein ;supported by full-length cDNA: Ceres:113230.                                                                            | 253689_at   | 1.6 |
| putative protein putative ATPase - Haematobia irritans,PID:g525318;supported by full-length cDNA: Ceres:4.                                    | 253630_at   | 1.6 |
| putative protein ; supported by cDNA: gi_13605598_gb_AF361625.1_AF361625                                                                      | 253388_at   | 1.6 |
| MYB-like protein myb-related protein Y49, Arabidopsis thaliana, PIR:S58292                                                                    | 253219_at   | 1.6 |
| putative protein F56F10.1, Caenorhabditis elegans, PATX:G1688051                                                                              | 253079_s_at | 1.6 |
| beta-galactosidase like protein ; supported by cDNA: gi_15810492_gb_AY056285.1_                                                               | 253090_at   | 1.6 |
| putative protein ; supported by cDNA: gi_13605658_gb_AF361810.1_AF361810                                                                      | 252856_at   | 1.6 |
| flavanone 3-hydroxylase (FH3) ;supported by full-length cDNA: Ceres:36653.                                                                    | 252123_at   | 1.6 |
| putative protein predicted proteins, Arabidopsis thaliana                                                                                     | 251894_at   | 1.6 |
| spliceosomal - like protein spliceosomal protein SAP 130, Homo sapiens, EMBL:HSAJ1443                                                         | 251837_s_at | 1.6 |
| alpha-galactosidase-like protein alpha galactosidase - Phaseolus vulgaris, PIR:T10860                                                         | 251729_at   | 1.6 |
| putative protein HIRA interacting protein 4 (dnaJ-like) - Homo sapiens, EMBL:AJ001309;supported by full-length cDNA: Ceres:37292.             | 251182_at   | 1.6 |
| ankyrin - like protein ankyrin G119, Homo sapiens, EMBL:HSU43965                                                                              | 250998_at   | 1.6 |
| histone deacetylase -like protein histone deacetylase, HD2-p39, nucleolar, Zea mays, PIR:T04141                                               | 250912_at   | 1.6 |
| glucuronosyl transferase-like protein                                                                                                         | 250750_at   | 1.6 |
| sorting nexin-like protein                                                                                                                    | 250714_at   | 1.6 |
| ABA-responsive protein - like ABA-responsive protein, Hordeum vulgare, EMBL:AF026538                                                          | 250279_at   | 1.6 |
| sigma-like factor (gb AAC97954.1) ; supported by cDNA: gi_3983259_gb_AF101075.1_AF101075                                                      | 250255_at   | 1.6 |
| putative protein CGI-67, Homo sapiens, EMBL:AF151825                                                                                          | 250175_at   | 1.6 |
| BCS1 - like protein h-bcs1, Homo sapiens, EMBL:AF026849; supported by cDNA: gi_15810570_gb_AY056324.1_                                        | 250062_at   | 1.6 |
| putative protein similar to unknown protein (gb AAF00631.1);supported by full-length cDNA: Ceres:10299.                                       | 250028_at   | 1.6 |
| prolylcarboxypeptidase-like protein ;supported by full-length cDNA: Ceres:122449.                                                             | 249860_at   | 1.6 |

|                                                                                                                                                            |             |     |
|------------------------------------------------------------------------------------------------------------------------------------------------------------|-------------|-----|
| putative protein                                                                                                                                           | 249622_at   | 1.6 |
| putative protein hypothetical protein - <i>Synechocystis</i> sp., PIR:S76678                                                                               | 249433_at   | 1.6 |
| glutathione transferase-like ;supported by full-length cDNA: Ceres:37349.                                                                                  | 249316_s_at | 1.6 |
| pitriylsin                                                                                                                                                 | 249218_at   | 1.6 |
| PINHEAD (gb AAD40098.1); translation initiation factor                                                                                                     | 249115_at   | 1.6 |
| putative protein similar to unknown protein (pir T05524);supported by full-length cDNA: Ceres:767.                                                         | 248952_at   | 1.6 |
| putative protein similar to unknown protein (sp P74035); supported by cDNA: gi_15292692_gb_AY050780.1_                                                     | 248906_at   | 1.6 |
| unknown protein ;supported by full-length cDNA: Ceres:302.                                                                                                 | 248834_at   | 1.6 |
| unknown protein                                                                                                                                            | 248067_at   | 1.6 |
| putative protein similar to unknown protein (emb CAB62440.1)                                                                                               | 248016_at   | 1.6 |
| GTP binding protein-like                                                                                                                                   | 247891_at   | 1.6 |
| putative protein predicted proteins, <i>Arabidopsis thaliana</i> and <i>Oryza sativa</i> ; supported by cDNA: gi_14532713_gb_AY039981.1_                   | 247466_at   | 1.6 |
| putative protein contains similarity to auxin-independent growth promoter                                                                                  | 247186_at   | 1.6 |
| unknown protein ;supported by full-length cDNA: Ceres:124621.                                                                                              | 247139_at   | 1.6 |
| hypothetical protein predicted by genemark.hmm; supported by full-length cDNA: Ceres: 12819.                                                               | 246581_at   | 1.6 |
| putative protein                                                                                                                                           | 246533_at   | 1.6 |
| putative protein AAA family protein Bor, <i>Drosophila melanogaster</i> , EMBL:AF227209                                                                    | 246461_at   | 1.6 |
| sucrose-phosphate synthase-like protein sucrose-phosphate synthase (EC 2.4.1.14) isoform 1 - Citrus unshiu, EMBL:AB005023; supported t                     | 246076_at   | 1.6 |
| alpha-galactosidase - like protein alpha-galactosidase, coffee, PIR:T50781                                                                                 | 246055_at   | 1.6 |
| sucrose-UDP glucosyltransferase                                                                                                                            | 245998_at   | 1.6 |
| unknown protein                                                                                                                                            | 245787_at   | 1.6 |
| dormancy-associated protein, putative similar to dormancy-associated protein GI:2995990 from [ <i>Arabidopsis thaliana</i> ]; supported by cDNA: g         | 245668_at   | 1.6 |
| cysteine proteinase contains similarity to papain-like cysteine proteinase isoform I GI:7381219 from [ <i>Ipomoea batatas</i> ]                            | 245483_at   | 1.6 |
| putative protein                                                                                                                                           | 245427_at   | 1.6 |
| putative protein various predicted proteins, <i>Arabidopsis thaliana</i>                                                                                   | 254457_at   | 1.5 |
| fatty acid elongase - like protein fatty acid elongase 1(Fae1), <i>Arabidopsis thaliana</i> , U29142                                                       | 253285_at   | 1.5 |
| putative myosin heavy chain                                                                                                                                | 267314_at   | 1.5 |
| FtsH protease (VAR2) identical to zinc dependent protease VAR2 GI:7650138 from [ <i>Arabidopsis thaliana</i> ]                                             | 267196_at   | 1.5 |
| putative AMP deaminase ; supported by cDNA: gi_15810524_gb_AY056301.1_                                                                                     | 267095_at   | 1.5 |
| putative RNA helicase                                                                                                                                      | 266932_s_at | 1.5 |
| hexokinase (ATHXK2) ; supported by cDNA: gi_1899024_gb_U28215.1_ATU28215                                                                                   | 266702_at   | 1.5 |
| unknown protein                                                                                                                                            | 266362_at   | 1.5 |
| putative PCI domain protein proteasome, COP9-complex and eIF3-domain protein; members of multi-protein complexes;supported by full-ler                     | 266310_at   | 1.5 |
| unknown protein ; supported by cDNA: gi_14532581_gb_AY039915.1_                                                                                            | 266315_at   | 1.5 |
| unknown protein                                                                                                                                            | 266188_at   | 1.5 |
| putative mitochondrial translation elongation factor G                                                                                                     | 266127_s_at | 1.5 |
| putative prolylcarboxypeptidase                                                                                                                            | 265990_at   | 1.5 |
| unknown protein                                                                                                                                            | 265760_at   | 1.5 |
| hypothetical protein                                                                                                                                       | 265425_at   | 1.5 |
| putative MYB family transcription factor ; supported by cDNA: gi_1020156_gb_U26937.1_ATU26937                                                              | 265359_at   | 1.5 |
| hypothetical protein contains similarity to zinc finger protein rts2 GB:U16133 GI:563244 from [ <i>Saccharomyces cerevisiae</i> ]; supported by cDNA/      | 265079_at   | 1.5 |
| putative prohibitin 2 B-cell receptor associated protein;supported by full-length cDNA: Ceres:6208.                                                        | 265037_at   | 1.5 |
| putative protein kinase, ADK1 dual specificity kinase 1; Location of ESTs 184A2XP 3 ; gb AA651408 and est 184A2T7, gb H37603. 99%+ ide                     | 265045_s_at | 1.5 |
| putative chloroplast membrane protein, ALBINO3 similar to GB:AAB61458                                                                                      | 265011_at   | 1.5 |
| phosphatidylinositol 3-kinase, putative similar to phosphatidylinositol 3-kinase GI:736338 from [ <i>Glycine max</i> ]; supported by cDNA: gi_555699       | 264927_at   | 1.5 |
| unknown protein Location of EST gb AA395277 gb T44807;supported by full-length cDNA: Ceres:36286.                                                          | 264894_at   | 1.5 |
| unknown protein location of EST gb H36530, gb AA395402, and gb T43793                                                                                      | 264772_at   | 1.5 |
| unknown protein location of EST gb T46445                                                                                                                  | 264776_at   | 1.5 |
| unknown protein similar to putative inositol polyphosphate 5 -phosphatase GI:3212848 from [ <i>Arabidopsis thaliana</i> ]                                  | 264683_at   | 1.5 |
| unknown protein                                                                                                                                            | 264597_at   | 1.5 |
| tat-binding protein, putative Highly Similar to branched-chain amino acid aminotransferase; Location of EST gb T44177 and gb AA395381; su                  | 264524_at   | 1.5 |
| hypothetical protein contains similarity to nuclear protein GI:1236985 from [ <i>Homo sapiens</i> ]; supported by cDNA: gi_14423425_gb_AF386950.           | 264486_at   | 1.5 |
| unknown protein similar to ESTs gb N96021 and gb N96863                                                                                                    | 264458_at   | 1.5 |
| HSP100/CipB, putative similar to HSP100/CipB GI:9651530 [ <i>Phaseolus lunatus</i> ]                                                                       | 264402_at   | 1.5 |
| hypothetical protein predicted by genemark.hmm                                                                                                             | 264224_at   | 1.5 |
| putative rubisco subunit binding-protein alpha subunit ;supported by full-length cDNA: Ceres:25773.                                                        | 264069_at   | 1.5 |
| putative GTP cyclohydrolase                                                                                                                                | 264045_at   | 1.5 |
| putative DnaJ protein ;supported by full-length cDNA: Ceres:10312.                                                                                         | 264002_at   | 1.5 |
| cyclophilin (CYP2) Same as GB: AF020434;supported by full-length cDNA: Ceres:35643.                                                                        | 264019_at   | 1.5 |
| unknown protein                                                                                                                                            | 263972_at   | 1.5 |
| putative citrate synthase ;supported by full-length cDNA: Ceres:17416.                                                                                     | 263986_at   | 1.5 |
| putative fructose bisphosphate aldolase ;supported by full-length cDNA: Ceres:13024.                                                                       | 263921_at   | 1.5 |
| unknown protein                                                                                                                                            | 263870_at   | 1.5 |
| subtilisin-like serine protease AIR3 almost identical to subtilisin-like protease AIR3 GI:4218991 from [ <i>Arabidopsis thaliana</i> ], missing 18 aa at t | 263406_at   | 1.5 |
| hypothetical protein predicted by genscan                                                                                                                  | 263200_at   | 1.5 |
| heat-shock protein, putative similar to heat-shock protein GI:472939 from [ <i>Helianthus annuus</i> ];supported by full-length cDNA: Ceres:97415.         | 263150_at   | 1.5 |
| unknown protein Similar to gb U51990 pre-mRNA-splicing factor hPrip18 from <i>Homo sapiens</i> . ESTs gb T46391 and gb AA721815 come from                  | 263116_s_at | 1.5 |
| purple acid phosphatase precursor identical to SP:Q38924                                                                                                   | 263083_at   | 1.5 |
| mak16-like protein-related similar to MAK16 PROTEIN GB:P10962 GI:127112 from [ <i>Saccharomyces cerevisiae</i> ] (Proc. Natl. Acad. Sci. U.S.,             | 263039_at   | 1.5 |
| hypothetical protein predicted by genemark.hmm; supported by cDNA: gi_13430457_gb_AF360141.1_AF360141                                                      | 262964_at   | 1.5 |
| putative inosine-5-monophosphate dehydrogenase strong similarity to gb L34684 inosine monophosphate dehydrogenase (IMPDH) from Arat                        | 262754_at   | 1.5 |
| unknown protein EST gb H77143 comes from this gene; supported by cDNA: gi_15293206_gb_AY051037.1_                                                          | 262570_at   | 1.5 |
| unknown protein Location of est 278F3T7 (gb AA650690)                                                                                                      | 262521_at   | 1.5 |
| ATPase, putative similar to chromaffin granule ATPase II GB:AAD03352 GI:4115341 from [ <i>Bos taurus</i> ]                                                 | 262275_at   | 1.5 |
| beta-glucosidase, putative similar to beta-glucosidase GI:5030906 from [ <i>Polygonum tinctorium</i> ]; supported by cDNA: gi_15146265_gb_AY04             | 262118_at   | 1.5 |
| unknown protein ; supported by cDNA: gi_6520232_dbj_AB028233.1_AB028233                                                                                    | 262080_at   | 1.5 |
| mRNA export protein, putative similar to mRNA export protein GB:AAC28126 GI:1903456 from [ <i>Homo sapiens</i> ];supported by full-length cDN              | 261896_at   | 1.5 |
| hypothetical protein predicted by genemark.hmm                                                                                                             | 261762_at   | 1.5 |
| hypothetical protein contains similarity to cockayne syndrome complementation group A protein GB:U28413 GI:975301 from ( <i>Homo sapiens</i> )             | 261644_s_at | 1.5 |
| hypothetical protein predicted by genemark.hmm;supported by full-length cDNA: Ceres:24737.                                                                 | 261625_at   | 1.5 |
| unknown protein ; supported by cDNA: gi_16604588_gb_AY059739.1_                                                                                            | 261538_at   | 1.5 |
| unknown protein                                                                                                                                            | 261250_at   | 1.5 |
| hypothetical protein predicted by genemark.hmm                                                                                                             | 261219_at   | 1.5 |

|                                                                                                                                                 |             |     |
|-------------------------------------------------------------------------------------------------------------------------------------------------|-------------|-----|
| subtilisin-like serine protease similar to subtilisin-type protease precursor GI:14150446 from [Glycine max];supported by full-length cDNA: Cer | 261224_at   | 1.5 |
| unknown protein                                                                                                                                 | 261168_at   | 1.5 |
| homeodomain protein BELL1, putative similar to GB:AAB05099 from [Arabidopsis thaliana] (Cell 83 (5), 735-742 (1995));supported by full-ler      | 261120_at   | 1.5 |
| unknown protein                                                                                                                                 | 260995_at   | 1.5 |
| unknown protein similar to unknown protein GB:AAF18609 GI:6598419 from [Arabidopsis thaliana]                                                   | 260884_at   | 1.5 |
| unknown protein                                                                                                                                 | 260862_at   | 1.5 |
| valyl-tRNA synthetase, putative similar to valyl tRNA synthetase GB:AAB49704 GI:1890130 from [Arabidopsis thaliana]; supported by cDNA:         | 260780_at   | 1.5 |
| Ring3-like bromodomain protein similar to Ring3 GB:BAA25416 GI:3041763 from [Mus musculus], contains Pfam profile:PF00439 Bromodon              | 260787_at   | 1.5 |
| RING-H2 finger protein RHA3a, putative similar to RING-H2 finger protein RHA3a GI:3790573 from [Arabidopsis thaliana]; supported by cDN         | 260770_at   | 1.5 |
| protein phosphatase 2C, putative similar to protein phosphatase 2C GI:3242077 from (Arabidopsis thaliana)                                       | 260712_at   | 1.5 |
| Expressed protein ; supported by full-length cDNA: Ceres: 13270.                                                                                | 260670_at   | 1.5 |
| hypothetical protein contains Pfam profile: PF01535 Domain of unknown function                                                                  | 260331_at   | 1.5 |
| putative sulfate transporter contains Pfam profile: PF00916 sulfate transporter family;supported by full-length cDNA: Ceres:120095.             | 260302_at   | 1.5 |
| unknown protein supported by cDNA: Ceres:35985; supported by cDNA: gi_13877918_gb_AF370222.1_AF370222                                           | 259739_at   | 1.5 |
| protein kinase, putative similar to GI:7573596 from [Populus nigra]                                                                             | 259670_at   | 1.5 |
| ATP-dependent RNA helicase, putative similar to ATP-dependent RNA helicase [Schizosaccharomyces pombe] GI:218533; supported by cD               | 259597_at   | 1.5 |
| alpha subunit of F-actin capping protein supported by full-length cDNA: Ceres:33531.                                                            | 259111_at   | 1.5 |
| hypothetical protein predicted by genscan+;supported by full-length cDNA: Ceres:19154.                                                          | 259037_at   | 1.5 |
| Mutator-like transposase similar to MURA transposase of maize Mutator transposon                                                                | 258789_at   | 1.5 |
| putative 2,3-bisphosphoglycerate-independent phosphoglycerate mutase similar to 2,3-bisphosphoglycerate-independent phosphoglycerate r          | 258679_at   | 1.5 |
| putative tRNA pseudouridine synthase similar to tRNA pseudouridine synthase A GB:P07649 [Escherichia coli]                                      | 258538_at   | 1.5 |
| neutral invertase, putative similar to neutral invertase GB:CAA76145 from [Daucus carota] (Physiol. Plantarum (1999) 107, 159-165)              | 258507_at   | 1.5 |
| hypothetical protein predicted by genemark.hmm                                                                                                  | 257864_at   | 1.5 |
| mitogen activated protein kinase kinase, putative similar to mitogen activated protein kinase kinase GB:AAC32599 from [Oryza sativa]            | 257801_at   | 1.5 |
| unknown protein                                                                                                                                 | 257685_at   | 1.5 |
| unknown protein contains Pfam profile:PF00439 bromodomain:Bromodomain                                                                           | 257146_at   | 1.5 |
| unknown protein ; supported by cDNA: gi_15081754_gb_AY048270.1_                                                                                 | 257153_at   | 1.5 |
| cytochrome P450, putative contains Pfam profile: PF00067 cytochrome P450;supported by full-length cDNA: Ceres:149380.                           | 257129_at   | 1.5 |
| zinc finger protein, putative similar to Cys2/His2-type zinc finger protein 2 GB:BAA85107 from [Arabidopsis thaliana]; supported by cDNA: gi_   | 257022_at   | 1.5 |
| Anthocyanin 5-aromatic acyltransferase, putative similar to Anthocyanin 5-aromatic acyltransferase GB:BAA74428 from [Gentiana triflora]         | 256924_at   | 1.5 |
| unknown protein contains similarity to plastid protein GB:AAB80660 from [Arabidopsis thaliana], contains Pfam profile: PF00076 RNA recogn       | 256805_at   | 1.5 |
| far-red impaired response protein, putative similar to GB:far-red impaired response protein GB:AAD51282 from [Arabidopsis thaliana] (Genes      | 256820_at   | 1.5 |
| hypothetical protein predicted by genemark.hmm                                                                                                  | 256613_at   | 1.5 |
| recombination signal sequence recognition protein, putative similar to recombination signal sequence recognition protein (SSRP1) SP:Q0894       | 256590_at   | 1.5 |
| hypothetical protein predicted by genemark.hmm                                                                                                  | 256573_at   | 1.5 |
| geranylgeranyl transferase type II beta subunit, putative similar to geranylgeranyl transferase type II beta subunit SP:P53611 [Homo sapiens    | 256276_at   | 1.5 |
| unknown protein                                                                                                                                 | 256229_at   | 1.5 |
| putative protein contains similarity to pseudouridine synthases; supported by cDNA: gi_13430549_gb_AF360187.1_AF360187                          | 255985_at   | 1.5 |
| hypothetical protein predicted by genscan+                                                                                                      | 255994_at   | 1.5 |
| hypothetical protein predicted by genscan and genefinder; similar to EGAD 50981 YBR228W                                                         | 255866_at   | 1.5 |
| hypothetical protein similar to putative phloem transcription factor GI:7630279 from [Apium graveolens]                                         | 255725_at   | 1.5 |
| putative myb-related DNA-binding protein                                                                                                        | 255614_at   | 1.5 |
| hypothetical protein ; supported by cDNA: gi_14517493_gb_AY039582.1_                                                                            | 255557_at   | 1.5 |
| putative protein similar to plant nucleic acid-binding proteins;supported by full-length cDNA: Ceres:6568.                                      | 255496_at   | 1.5 |
| auxin-binding protein 1 precursor ; supported by full-length cDNA: Ceres:34126.                                                                 | 255412_at   | 1.5 |
| putative protein proteins of this bac                                                                                                           | 255087_at   | 1.5 |
| putative trehalose-6-phosphate phosphatase (AtTPPA) trehalose-6-phosphate phosphatase - Arabidopsis thaliana, PID:g2944178; supportec           | 254806_at   | 1.5 |
| DAG-like protein DAG precursor, Antirrhinum majus, MNOS:S71747                                                                                  | 254493_at   | 1.5 |
| putative protein pmt2 methyltransferase - Schizosaccharomyces pombe,PID:e1362538                                                                | 254079_at   | 1.5 |
| hypothetical protein                                                                                                                            | 253782_at   | 1.5 |
| glycine-rich protein glycine-rich cell wall structural protein - garden petunia,Pir2:A26099                                                     | 253619_at   | 1.5 |
| putative protein hypothetical protein - Synechocystis sp. (strain PCC 6803),PIR2:S76076                                                         | 253585_at   | 1.5 |
| predicted protein ; supported by cDNA: gi_15292824_gb_AY050846.1_                                                                               | 253524_at   | 1.5 |
| sulfolipid biosynthesis protein SQD1 ; supported by cDNA: gi_14190482_gb_AF380641.1_AF380641                                                    | 253386_at   | 1.5 |
| formamidase - like protein formamidase, Methylophilus methylotrophus, PIR2:S74213; supported by cDNA: gi_14334653_gb_AY035000.1_                | 253048_at   | 1.5 |
| phosphoenolpyruvate carboxykinase (ATP) - like protein ; supported by cDNA: gi_13937136_gb_AF372922.1_AF372922                                  | 253041_at   | 1.5 |
| hypothetical protein several hypothetical proteins - Arabidopsis thaliana                                                                       | 252473_s_at | 1.5 |
| putative protein predicted proteins, Arabidopsis thaliana                                                                                       | 252402_s_at | 1.5 |
| serine palmitoyltransferase-like protein                                                                                                        | 252331_s_at | 1.5 |
| putative protein pir7a protein - Oryza sativa, PIR:s47086;supported by full-length cDNA: Ceres:30104.                                           | 252168_at   | 1.5 |
| putative protein predicted protein, Arabidopsis thaliana                                                                                        | 252016_at   | 1.5 |
| putative protein GTP-binding regulatory protein beta chain, Dictyostelium discoideum, PIR:A47370; supported by cDNA: gi_13430701_gb_AF          | 251888_at   | 1.5 |
| putative protein MSP58 - nucleolar protein, Mus musculus, EMBL:AF015309; supported by cDNA: gi_17063177_gb_AY062111.1_                          | 251866_at   | 1.5 |
| alpha-soluble NSF attachment protein ; supported by cDNA: gi_6013203_gb_AF177989.1_AF177989                                                     | 251721_s_at | 1.5 |
| putative protein several hypothetical proteins - Arabidopsis thaliana;supported by full-length cDNA: Ceres:112338.                              | 251530_at   | 1.5 |
| squamosa promoter binding protein-like 12                                                                                                       | 251450_at   | 1.5 |
| palmitoyl-protein thioesterase precursor - like palmitoyl-protein thioesterase precursor, Mus musculus, EMBL:AF071025; supported by full-ler    | 251408_at   | 1.5 |
| serine/threonine-protein kinase-like protein serine/threonine kinase UNC51.2 - Mus musculus, EMBL:AF145922; supported by cDNA: gi_143           | 251273_at   | 1.5 |
| aldose reductase-like protein aldose reductase - Hordeum vulgare, EMBL:Z48360                                                                   | 251100_at   | 1.5 |
| putative protein hypothetical protein T6H20.90 - Arabidopsis thaliana, EMBL:AL096859; supported by cDNA: gi_16648747_gb_AY058150.1_             | 251039_at   | 1.5 |
| putative protein ; supported by cDNA: gi_14190430_gb_AF378893.1_AF378893                                                                        | 250970_at   | 1.5 |
| putative protein ABI3-interacting protein, Arabidopsis thaliana, EMBL:ATH251086; supported by cDNA: gi_14532637_gb_AY039943.1_                  | 250971_at   | 1.5 |
| putative protein                                                                                                                                | 250946_at   | 1.5 |
| putative protein ; supported by cDNA: gi_1019903_gb_U37587.1_ATU37587                                                                           | 250899_at   | 1.5 |
| F1F0-ATPase inhibitor - like protein F1F0-ATPase inhibitor protein, OsiF1-1, Oryza sativa, EMBL:AB029059; supported by full-length cDNA:        | 250863_at   | 1.5 |
| RNA helicase-like protein                                                                                                                       | 250529_at   | 1.5 |
| putative protein predicted proteins, Arabidopsis thaliana;supported by full-length cDNA: Ceres:403.                                             | 250332_at   | 1.5 |
| translocon Tic40-like protein ; supported by cDNA: gi_16226312_gb_AF428299.1_AF428299                                                           | 250080_at   | 1.5 |
| putative protein strong similarity to unknown protein (gb AAD21756.1); supported by cDNA: gi_15146184_gb_AY049233.1_ although this cDN          | 249703_at   | 1.5 |
| receptor serine/threonine protein kinase -like receptor serine/threonine kinase PR5K, Arabidopsis thaliana, EMBL:AT48698                        | 249552_s_at | 1.5 |
| unknown protein ;supported by full-length cDNA: Ceres:101366.                                                                                   | 249456_at   | 1.5 |
| GTPase activator protein of Rab-like small GTPases-like protein                                                                                 | 249281_at   | 1.5 |
| putative protein strong similarity to unknown protein (gb AAF24960.1)                                                                           | 249133_at   | 1.5 |

|                                                                                                                                                       |             |     |
|-------------------------------------------------------------------------------------------------------------------------------------------------------|-------------|-----|
| cytosolic malate dehydrogenase ;supported by full-length cDNA: Ceres:40174.                                                                           | 249147_at   | 1.5 |
| putative protein strong similarity to unknown protein (pir T05325); supported by cDNA: gi_13605502_gb_AF361577.1_AF361577                             | 249011_at   | 1.5 |
| GTP-binding protein-like; root hair defective 3 protein-like                                                                                          | 248985_at   | 1.5 |
| putative protein contains similarity to unknown protein (pir T39016);supported by full-length cDNA: Ceres:15623.                                      | 248757_at   | 1.5 |
| putative protein contains similarity to CCAAT-box-binding transcription factor; supported by cDNA: gi_14326579_gb_AF385744.1_AF385744                 | 248764_at   | 1.5 |
| putative protein contains similarity to L-isoaspartyl protein carboxyl methyltransferase                                                              | 248544_at   | 1.5 |
| putative protein contains similarity to unknown protein (pir T05510)                                                                                  | 248499_at   | 1.5 |
| putative protein contains similarity to unknown protein (pir T26512)                                                                                  | 248463_at   | 1.5 |
| unknown protein ;supported by full-length cDNA: Ceres:92267.                                                                                          | 248445_at   | 1.5 |
| putative protein similar to unknown protein (ref NP_014050.1)                                                                                         | 248308_at   | 1.5 |
| putative protein strong similarity to unknown protein (pir T04825); supported by cDNA: gi_14596222_gb_AY042899.1                                      | 248115_at   | 1.5 |
| ubiquitin-specific protease 23 (UBP23), putative similar to GI:11993486; supported by cDNA: gi_11993485_gb_AF302671.1_AF302671                        | 247838_at   | 1.5 |
| contains similarity to phosphoesterase                                                                                                                | 247854_at   | 1.5 |
| oxysterol-binding protein - like oxysterol-binding protein, Mus musculus, EMBL:AB017026; supported by cDNA: gi_15450785_gb_AY054473                   | 247677_at   | 1.5 |
| pseudo-response regulator - like pseudo-response regulator 1 APRR1, Arabidopsis thaliana, EMBL:AB041530; supported by cDNA: gi_1028                   | 247668_at   | 1.5 |
| glucosidase II alpha subunit                                                                                                                          | 247298_at   | 1.5 |
| putative protein similar to unknown protein (emb CAB77570.1)                                                                                          | 247323_at   | 1.5 |
| putative protein strong similarity to unknown protein (emb CAB62118.1)                                                                                | 247032_at   | 1.5 |
| PHD finger protein - like PHD finger protein 3, Homo sapiens, EMBL:AF091622                                                                           | 246893_at   | 1.5 |
| dehydration-induced protein RD22 ; supported by cDNA: gi_16974545_gb_AY060560.1                                                                       | 246908_at   | 1.5 |
| putative protein protein At2g40060 - Arabidopsis thaliana, EMBL:AF002109;supported by full-length cDNA: Ceres:93427.                                  | 246305_at   | 1.5 |
| TINY-like protein ; supported by cDNA: gi_16323158_gb_AY057683.1                                                                                      | 246222_at   | 1.5 |
| protein kinase tousled ; supported by cDNA: gi_433051_gb_L23985.1_ATHTGPA                                                                             | 246134_at   | 1.5 |
| putative protein BEM46 bem1/bud5 suppressor, Schizosaccharomyces pombe, bem1/bud5 suppressor, EMBL:SP29892;supported by full-ler                      | 246090_at   | 1.5 |
| hyoscyamine 6-dioxygenase hydroxylase, putative similar to hyoscyamine 6-dioxygenase hydroxylase GB:P24397 from [Hyoscyamus niger];                   | 245756_at   | 1.5 |
| AMP-binding protein                                                                                                                                   | 245621_at   | 1.5 |
| putative protein                                                                                                                                      | 245588_at   | 1.5 |
| SEN1 like protein                                                                                                                                     | 245529_at   | 1.5 |
| acyl-CoA oxidase like protein ; supported by cDNA: gi_3044213_gb_AF057044.1_AF057044                                                                  | 245249_at   | 1.5 |
| phytochelatin synthetase-like protein gene_id:K17E7.120;supported by full-length cDNA: Ceres:98007.                                                   | 245228_at   | 1.5 |
| unknown protein                                                                                                                                       | 245054_at   | 1.5 |
| hypothetical protein                                                                                                                                  | 244918_at   | 1.5 |
| hypothetical protein                                                                                                                                  | 257324_at   | 1.5 |
| putative RING3 protein                                                                                                                                | 257352_at   | 1.5 |
| hypothetical protein predicted by gensecan                                                                                                            | 257444_at   | 1.5 |
| hypothetical protein                                                                                                                                  | 259535_at   | 1.5 |
| hypothetical protein contains non-consensus GA donor splice site at exon 2                                                                            | 251298_at   | 1.5 |
| unknown protein contains non-consensus TG donor splice site at exon 1                                                                                 | 245227_s_at | 1.4 |
| putative protein ;supported by full-length cDNA: Ceres:32357.                                                                                         | 253229_at   | 1.4 |
| Escherichia coli /REF=J04423 /DEF=E coli bioB gene biotin synthetase corresponding to nucleotides 2772-3004 of J04423 /LEN=1114 (-5, -FX-r2-Ec-bioB-3 | 267483_at   | 1.4 |
| unknown protein ;supported by full-length cDNA: Ceres:35441.                                                                                          | 267489_s_at | 1.4 |
| putative DNA2-NAM7 helicase family protein                                                                                                            | 267429_at   | 1.4 |
| putative UDP-galactose-4-epimerase                                                                                                                    | 267364_at   | 1.4 |
| unknown protein ;supported by full-length cDNA: Ceres:9398.                                                                                           | 267312_at   | 1.4 |
| unknown protein                                                                                                                                       | 267335_s_at | 1.4 |
| putative beta-1,3-glucanase                                                                                                                           | 267130_at   | 1.4 |
| hypothetical protein predicted by gensecan                                                                                                            | 267102_at   | 1.4 |
| putative small nuclear ribonucleoprotein Prp4p                                                                                                        | 267050_at   | 1.4 |
| putative RNA-binding protein ; supported by cDNA: gi_16612301_gb_AF439844.1_AF439844                                                                  | 266939_at   | 1.4 |
| plasma membrane proton ATPase (PMA) identical to GB:M24107; supported by cDNA: gi_166745_gb_M24107.1_ATHHATPA                                         | 266897_at   | 1.4 |
| remorin identical to GB:M25268, a non-specific DNA binding protein; may be involved in intercellular communication; supported by cDNA: gi_            | 266763_at   | 1.4 |
| unknown protein                                                                                                                                       | 266707_at   | 1.4 |
| hypothetical protein predicted by gensecan                                                                                                            | 266589_at   | 1.4 |
| hypothetical protein predicted by gensecan and genefinder                                                                                             | 266537_at   | 1.4 |
| Expressed protein ; supported by full-length cDNA: Ceres: 34622.                                                                                      | 266090_at   | 1.4 |
| unknown protein                                                                                                                                       | 265991_at   | 1.4 |
| chloroplast single subunit DNA-dependent RNA polymerase identical to GB:Y08722                                                                        | 265912_at   | 1.4 |
| hypothetical protein predicted by gensecan;supported by full-length cDNA: Ceres:21954.                                                                | 265810_at   | 1.4 |
| unknown protein                                                                                                                                       | 265519_at   | 1.4 |
| hypothetical protein                                                                                                                                  | 265535_at   | 1.4 |
| hypothetical protein predicted by gensecan and genefinder, contains a Bem1/NCF1/PI3K domain (prosite:QDOC50195)                                       | 265474_at   | 1.4 |
| Expressed protein ; supported by cDNA: gi_14335135_gb_AY037247.1_                                                                                     | 265452_at   | 1.4 |
| putative bHLH transcription factor                                                                                                                    | 265440_at   | 1.4 |
| pEARL1 4 protein Same as GB: L43081; supported by cDNA: gi_871781_gb_L43081.1_ATHPEARA                                                                | 265310_at   | 1.4 |
| hypothetical protein predicted by genefinder                                                                                                          | 265235_s_at | 1.4 |
| hypothetical protein                                                                                                                                  | 265182_at   | 1.4 |
| putative auxin-induced protein ;supported by full-length cDNA: Ceres:155143.                                                                          | 265040_at   | 1.4 |
| G-box binding factor, GBF4 Identical to Arabidopsis thaliana G-box-binding factor 4, gb U01823;supported by full-length cDNA: Ceres:36980.            | 264987_at   | 1.4 |
| unknown protein ; supported by cDNA: gi_14517457_gb_AY039564.1_                                                                                       | 264999_at   | 1.4 |
| hypothetical protein contains similarity to light-induced DNA-binding protein(CG-1) GI:587503 from [Petroselinum crispum]                             | 264957_at   | 1.4 |
| F-box protein family, AtFBL5 contains similarity to F-box protein FBL2 GI:6063090 from [Homo sapiens];supported by full-length cDNA: Cere:            | 264878_at   | 1.4 |
| unknown protein                                                                                                                                       | 264839_at   | 1.4 |
| putative protochlorophyllide reductase similar to protochlorophyllide reductase precursor; similar to ESTs gb R30630, gb T46162, emb Z2672f           | 264806_at   | 1.4 |
| hypothetical protein predicted by gensecan                                                                                                            | 264540_at   | 1.4 |
| hypothetical protein predicted by genemark.hmm                                                                                                        | 264529_at   | 1.4 |
| CTP synthase-like protein similar to ctp synthase (sp P17812 PYRG_HUMAN); similar to ESTs gb AA660762, gb AA220982, dbj AU008137,                     | 264460_at   | 1.4 |
| hypothetical protein similar to transcriptional repressor NF-X1 in Homo sapiens (sp Q12986 NFX1_HUMAN); similar to EST gb T21002                      | 264310_at   | 1.4 |
| hypothetical protein similar to hypothetical protein GI:7378617 from [Arabidopsis thaliana]                                                           | 264250_at   | 1.4 |
| gamma glutamyl hydrolase, putative similar to gamma glutamyl hydrolase GI:1680711 from [Glycine max]; supported by cDNA: gi_3169655_                  | 264219_at   | 1.4 |
| unknown protein contains similarity to tryparedoxin GI:3851498 from [Crithidia fasciculata];supported by full-length cDNA: Ceres:34936.               | 264221_s_at | 1.4 |
| unknown protein contains similarity to splicing factor required for vegetative and meiotic growth GI:2959374 from [Schizosaccharomyces pombe]         | 264001_at   | 1.4 |
| putative peroxidase ;supported by full-length cDNA: Ceres:113695.                                                                                     | 263669_at   | 1.4 |
| putative cryptochrome 2 apoprotein Match to Arabidopsis photolysase (PHH1) gene (gb X99061) and cryptochrome 2 apoprotein (CRY2) (gb                  |             |     |

|                                                                                                                                                |             |     |
|------------------------------------------------------------------------------------------------------------------------------------------------|-------------|-----|
| transcription factor ZAP1 identical to GP:1064883:X92976                                                                                       | 263626_at   | 1.4 |
| hypothetical protein                                                                                                                           | 263505_s_at | 1.4 |
| unknown protein ; supported by cDNA: gi_15810174_gb_AY056101.1_                                                                                | 263333_at   | 1.4 |
| putative protein kinase contains a protein kinase domain profile (PDOC00100); supported by cDNA: gi_13605880_gb_AF367339.1_AF367339            | 263274_at   | 1.4 |
| hypothetical protein predicted by gensecan and genefinder                                                                                      | 263101_s_at | 1.4 |
| NADP-isocitrate dehydrogenase, putative similar to NADP-isocitrate dehydrogenase GI:5764653 from [Citrus limon]; supported by cDNA: gi_        | 262962_at   | 1.4 |
| polyamine oxidase, putative similar to polyamine oxidase SP:O64411 [Zea mays (Maize)]; supported by cDNA: gi_13877614_gb_AF370508.             | 262933_at   | 1.4 |
| unknown protein contains similarity to helicase GI:914852 from [Homo sapiens]                                                                  | 262906_at   | 1.4 |
| putative heat-shock protein strong similarity to gb Z70314 heat-shock protein from Arabidopsis thaliana and is a member of the PF 00012 Hsp    | 262814_at   | 1.4 |
| hypothetical protein identical to hypothetical protein GB:AAD50051 GI:5734786 from [Arabidopsis thaliana]; supported by cDNA: gi_15081691      | 262419_at   | 1.4 |
| putative cyclin similar to cyclin GB:4502627 from [Homo sapiens];supported by full-length cDNA: Ceres:33877.                                   | 262296_at   | 1.4 |
| hypothetical protein predicted by genemark.hmm;supported by full-length cDNA: Ceres:116121.                                                    | 262111_at   | 1.4 |
| unknown protein contains similarity to peroxin-2 GI:6103008 from [Pichia pastoris];supported by full-length cDNA: Ceres:96370.                 | 262114_at   | 1.4 |
| transcriptional regulator, putative similar to transcriptional regulator GI:4836767 [Zea mays]                                                 | 261891_at   | 1.4 |
| scarecrow-like protein similar to SCARECROW GB:AAB06318 GI:1497987 from [Arabidopsis thaliana]; supported by cDNA: gi_14334475_gb              | 261860_at   | 1.4 |
| receptor-like kinase, putative similar to receptor-like kinase GI:1783311 from [Brassica oleracea]                                             | 261819_at   | 1.4 |
| ferrodoxin NADP oxidoreductase, putative similar to ferrodoxin NADP oxidoreductase GB:X99419 GI:1480346 from [Pisum sativum]supporte           | 261806_at   | 1.4 |
| vacuolar assembly protein vps41, putative similar to vacuolar assembly protein vps41 GI:1835787 from [Lycopersicon esculentum]                 | 261783_at   | 1.4 |
| hypothetical protein contains similarity to Na+/H+ antiporter GI:1655701 from [Xenopus laevis]                                                 | 261398_at   | 1.4 |
| 26S proteasome regulatory subunit, putative similar to GB:AAC04490 from [Arabidopsis thaliana]                                                 | 261174_at   | 1.4 |
| DYW7 protein identical to DYW7 protein of unknown function GB:CAA06829 from [Arabidopsis thaliana] (Plant Mol. Biol. 42 (4), 603-613 (20)      | 261133_at   | 1.4 |
| hypothetical protein predicted by gensecan+; supported by full-length cDNA: Ceres: 107992.                                                     | 260981_at   | 1.4 |
| chloroplast inner envelope protein, putative similar to chloroplast inner envelope protein GB:CAA92823 GI:1495768 from [Pisum sativum]         | 260815_at   | 1.4 |
| splicing factor, putative similar to human splicing factor GB:CAA59494 GI:899298 from [Homo sapiens]                                           | 260779_at   | 1.4 |
| fructokinase (Frk1), putative similar to fructokinase (Frk1) GI:2102690 from (Lycopersicon esculentum)                                         | 260343_at   | 1.4 |
| hypothetical protein similar to hypothetical protein GB:AAC00595 [Arabidopsis thaliana]                                                        | 260194_at   | 1.4 |
| hypothetical protein similar to hypothetical protein GB:CAB37532 from [Arabidopsis thaliana], predicted by gensecan+;supported by full-length  | 260127_at   | 1.4 |
| F-box protein FKF1/ADO3, AtFBX2a identical to FKF1 GI:6960305 and Adagio 3 GI:13487072 from [Arabidopsis thaliana]                             | 259990_s_at | 1.4 |
| hypothetical protein ;supported by full-length cDNA: Ceres:110945.                                                                             | 259862_at   | 1.4 |
| beta-1,3-glucanase precursor, putative similar to GI:4097948 from [Oryza sativa] (Gene 223 (1-2), 311-320 (1998))                              | 259823_at   | 1.4 |
| unknown protein                                                                                                                                | 259767_s_at | 1.4 |
| GRAB1-like protein similar to GRAB1 protein GB:CAA09371, a novel member of the NAC domain family;supported by full-length cDNA: Cere           | 259705_at   | 1.4 |
| unknown protein                                                                                                                                | 259489_at   | 1.4 |
| unknown protein ; supported by cDNA: gi_16930412_gb_AF419560.1_AF419560                                                                        | 259418_at   | 1.4 |
| methionine aminopeptidase I (MAP1), putative similar to methionine aminopeptidase I (MAP1) GI:975722 from [Saccharomyces cerevisiae];          | 259363_at   | 1.4 |
| hypothetical protein predicted by gensecan;supported by full-length cDNA: Ceres:18207.                                                         | 259235_at   | 1.4 |
| putative mRNA capping enzyme, RNA guanylyltransferase contains similarity to mRNA capping enzyme GB:BAA25198 from [Homo sapiens]               | 259202_at   | 1.4 |
| transcription initiation factor IIB (TFIIB) identical to ATFIIB2 GB:CAA84309 [Arabidopsis thaliana];supported by full-length cDNA: Ceres:3895f | 259155_at   | 1.4 |
| digalactosyldiacylglycerol synthase identical to digalactosyldiacylglycerol synthase GB:AAD42378 [Arabidopsis thaliana]; supported by cDNA:    | 259070_at   | 1.4 |
| unknown protein                                                                                                                                | 259052_at   | 1.4 |
| unknown protein                                                                                                                                | 258949_at   | 1.4 |
| hydroxyacylglutathione hydrolase cytoplasmic (glyoxalase II) (GLX II) identical to hydroxyacylglutathione hydrolase cytoplasmic (glyoxalase I  | 258775_at   | 1.4 |
| hypothetical protein predicted by gensecan; supported by cDNA: gi_15982780_gb_AY057497.1_                                                      | 258660_at   | 1.4 |
| putative cytochrome P450 similar to GB:Q05047 from [Catharanthus roseus]                                                                       | 258114_at   | 1.4 |
| hypothetical protein predicted by genmark;supported by full-length cDNA: Ceres:19279.                                                          | 258091_at   | 1.4 |
| unknown protein ; supported by cDNA: gi_14334819_gb_AY035083.1_                                                                                | 258093_at   | 1.4 |
| ethylene-insensitive 3 (EIN3) identical to GB:AAC49749 from [Arabidopsis thaliana]                                                             | 257981_at   | 1.4 |
| seed maturation protein, putative similar to seed maturation protein (PM36) GB:AAD51624 [Glycine max];supported by full-length cDNA: Cen       | 257888_at   | 1.4 |
| SNF1 related protein kinase (ATSRPK1) identical to SNF1 related protein kinase (ATSRPK1) GB:AB027153 [Arabidopsis thaliana]; supportec         | 257771_at   | 1.4 |
| unknown protein                                                                                                                                | 257719_at   | 1.4 |
| monodehydroascorbate reductase similar to cytosolic monodehydroascorbate reductase GB:BAA77214 [Oryza sativa]; supported by cDNA: g            | 257227_at   | 1.4 |
| Expressed protein ; supported by full-length cDNA: Ceres: 93242.                                                                               | 257193_at   | 1.4 |
| RNA helicase, putative similar to RNA helicase GB:CAA09195 from [Arabidopsis thaliana]; supported by cDNA: gi_15215677_gb_AY050367             | 257023_at   | 1.4 |
| hypothetical protein predicted by gensecan+                                                                                                    | 256823_at   | 1.4 |
| unknown protein contains similarity to phospholipase a-2-activating protein SP:P27612 from [Mus musculus]; supported by cDNA: gi_152942;       | 256657_at   | 1.4 |
| unknown protein ;supported by full-length cDNA: Ceres:38478.                                                                                   | 256663_at   | 1.4 |
| unknown protein                                                                                                                                | 256542_at   | 1.4 |
| unknown protein similar to N-term half of NAC domain protein NAM [Arabidopsis thaliana] GI:4325282;supported by full-length cDNA: Ceres:2      | 256300_at   | 1.4 |
| transcription factor HBP-1B-like nearly identical to transcription factor HBP-1B SP:P43273 [Arabidopsis thaliana (Mouse-ear cross)]; supporte  | 256269_at   | 1.4 |
| unknown protein                                                                                                                                | 256258_at   | 1.4 |
| DNA polymerase A family protein, putative contains Pfam profile: PF00476: DNA polymerase family A                                              | 256204_at   | 1.4 |
| hypothetical protein similar to putative glutamine dependent NAD+ synthetase GB:O74940 GI:8928216 from [Schizosaccharomyces pombe]             | 256148_at   | 1.4 |
| unknown protein                                                                                                                                | 256106_at   | 1.4 |
| unknown protein                                                                                                                                | 256041_at   | 1.4 |
| putative protein embryonic abundant protein EMB20, white spruce, PIR:T09241                                                                    | 255859_at   | 1.4 |
| putative protein                                                                                                                               | 255664_at   | 1.4 |
| hypothetical protein                                                                                                                           | 255611_at   | 1.4 |
| putative CHP-rich zinc finger protein similar to several A. thaliana CHP-rich proteins                                                         | 255546_at   | 1.4 |
| hypothetical protein identical to T10M13.21 ; supported by cDNA: gi_15293058_gb_AY050963.1_                                                    | 255509_at   | 1.4 |
| predicted protein of unknown function similar to P. falciparum O1 protein, GenBank accession number AF030694                                   | 255495_at   | 1.4 |
| 4-coumarate--CoA ligase - like protein 4-coumarate--CoA ligase 4CL, Arabidopsis thaliana, PIR:S57784                                           | 255263_at   | 1.4 |
| subtilisin-like serine protease contains similarity to subtilisin-like protease AIR3 GI:4218991 from [Arabidopsis thaliana]                    | 254979_at   | 1.4 |
| putative transcriptional regulator                                                                                                             | 254992_at   | 1.4 |
| 3-hydroxyisobutyryl-coenzyme A hydrolase - like protein 3-hydroxyisobutyryl-coenzyme A hydrolase, Homo sapiens, U66669;supported by fu         | 254776_at   | 1.4 |
| vacuolar sorting receptor-like protein BP-80 vacuolar sorting receptor, Pisum sativum, PATCHX:G1737222                                         | 254500_at   | 1.4 |
| auxin response factor 9 (ARF9) ; supported by cDNA: gi_4580574_gb_AF082176.1_AF082176                                                          | 254194_at   | 1.4 |
| nucleosome assembly protein I-like protein ; supported by cDNA: gi_15450807_gb_AY054484.1_                                                     | 253996_at   | 1.4 |
| pyrophosphate-dependent phosphofructo-1-kinase pyrophosphate-dependent phosphofructo-1-kinase, Prunus armeniaca, U93272; supporte              | 253987_at   | 1.4 |
| putative protein hypothetical protein YOR261c, yeast, PIR2:S67158;supported by full-length cDNA: Ceres:36616.                                  | 253969_at   | 1.4 |
| translation initiation factor ; supported by full-length cDNA: Ceres: 5206.                                                                    | 253900_at   | 1.4 |
| signal recognition particle receptor-like protein signal recognition particle receptor - Homo sapiens,PIR2:A29440                              | 253625_at   | 1.4 |
| putative protein tetratricopeptide repeat protein - Homo sapiens,PID:g1688074;supported by full-length cDNA: Ceres:12573.                      | 253633_at   | 1.4 |
| putative protein KIAA0800 protein, Homo sapiens, EMBL:AB018343                                                                                 | 253560_at   | 1.4 |



|                                                                                                                                           |             |     |
|-------------------------------------------------------------------------------------------------------------------------------------------|-------------|-----|
| predicted protein cation transport protein ChaC, Escherichia coli, PIR2:G64868;supported by full-length cDNA: Ceres:39740.                | 253522_at   | 1.4 |
| putative protein various predicted proteins                                                                                               | 253432_at   | 1.4 |
| putative poly(A) polymerase polynucleotide adenylyltransferase (EC 2.7.7.19) class I - bovine, PIR2:S17875                                | 253399_at   | 1.4 |
| hypothetical protein                                                                                                                      | 253294_at   | 1.4 |
| putative protein B subunit of propionyl-CoA carboxylase, Mycobacterium tuberculosis, PATCHX:E290075; supported by cDNA: gi_14423377       | 253279_at   | 1.4 |
| hypothetical protein ;supported by full-length cDNA: Ceres:115167.                                                                        | 253232_at   | 1.4 |
| putative protein various predicted proteins, Arabidopsis thaliana                                                                         | 252901_at   | 1.4 |
| putative protein 70K peroxisomal membrane protein, Rattus norvegicus ,PIR2:A35723; supported by cDNA: gi_15320528_gb_AF378120.1_f         | 252830_at   | 1.4 |
| disease resistance protein RPP13-like protein disease resistance protein RPP8 - Arabidopsis thaliana, EMBL:AF089710; supported by cDNA    | 252485_at   | 1.4 |
| putative protein ; supported by cDNA: gi_14334983_gb_AY035165.1_                                                                          | 252391_at   | 1.4 |
| Expressed protein ; supported by full-length cDNA: Ceres: 151603.                                                                         | 252365_at   | 1.4 |
| putative protein hypothetical protein F16F14.2 - Arabidopsis thaliana, EMBL:AC007047                                                      | 252142_at   | 1.4 |
| putative protein predicted protein, Arabidopsis thaliana                                                                                  | 251753_at   | 1.4 |
| putative protein PBK1 protein, Homo sapiens, EMBL:HSA7398                                                                                 | 251538_at   | 1.4 |
| putative protein ETHIONINE AMINOPEPTIDASE 2 (EC 3.4.11.18) - Mus musculus,EMBL:AB003144;supported by full-length cDNA: Ceres:1            | 251444_at   | 1.4 |
| dynamlin-like protein 4 (ADL4) ; supported by cDNA: gi_6651400_gb_AF180733.1_AF180733                                                     | 251429_at   | 1.4 |
| ABC transporter-like protein glutathione-conjugate transporter AtMRP4 - Arabidopsis thaliana, EMBL:AJ002584                               | 251227_at   | 1.4 |
| putative protein hypothetical protein At2g28380 - Arabidopsis thaliana, EMBL:AC006283                                                     | 251233_at   | 1.4 |
| putative protein ZCF61, Arabidopsis thaliana, EMBL:AB028228; supported by cDNA: gi_15810464_gb_AY056271.1_                                | 251156_at   | 1.4 |
| putative protein predicted protein, Arabidopsis thaliana                                                                                  | 251145_at   | 1.4 |
| putative protein various predicted proteins, Arabidopsis thaliana; supported by cDNA: gi_13878024_gb_AF370275.1_AF370275                  | 250937_at   | 1.4 |
| putative protein ; supported by cDNA: gi_14326524_gb_AF385716.1_AF385716                                                                  | 250896_at   | 1.4 |
| putative protein NAC2, Arabidopsis thaliana, EMBL:AF201456; supported by cDNA: gi_6456750_gb_AF201456.1_AF201456                          | 250849_at   | 1.4 |
| unknown protein                                                                                                                           | 250822_at   | 1.4 |
| cleft lip and palate associated transmembrane protein-like                                                                                | 250522_at   | 1.4 |
| putative protein similar to unknown protein (pir T27191);supported by full-length cDNA: Ceres:249722.                                     | 250532_at   | 1.4 |
| putative protein rjs protein, Mus musculus, PIR:T14317;supported by full-length cDNA: Ceres:266544.                                       | 250382_at   | 1.4 |
| putative protein various predicted proteins, Drosophila melanogaster, Caenorhabditis elegans, Homo sapiens; supported by full-length cDN  | 250384_at   | 1.4 |
| protein kinase precursor - like receptor-like protein kinase 5 precursor, Arabidopsis thaliana, SWISSPROT:RLK5_ARATH                      | 250284_at   | 1.4 |
| pescadillo - like protein embryonic development allele: hi2, Danio rerio, EMBL:U77627 pescadillo, Homo sapiens, EMBL:U78310               | 250192_at   | 1.4 |
| isocitrate dehydrogenase - like protein isocitrate dehydrogenase, Nicotiana tabacum, pir:T04356                                           | 250197_at   | 1.4 |
| potassium-dependent sodium-calcium exchanger - like protein cone sodium-calcium potassium exchanger (NCKX), Homo sapiens, EMBL:AF         | 250053_at   | 1.4 |
| kinase associated protein phosphatase ; supported by cDNA: gi_15027992_gb_AY045853.1_                                                     | 249924_at   | 1.4 |
| unknown protein ; supported by cDNA: gi_9695278_dbj_AB046717.1_AB046717                                                                   | 249840_at   | 1.4 |
| putative protein contains similarity to two-component response regulator protein; supported by cDNA: gi_10281005_dbj_AB046955.1_AB046     | 249741_at   | 1.4 |
| putative protein GTP-binding proteins - different species                                                                                 | 249434_at   | 1.4 |
| putative protein similar to unknown protein (pir T30561)                                                                                  | 249240_at   | 1.4 |
| putative protein similar to unknown protein (sp P42251); supported by cDNA: gi_13430795_gb_AF360310.1_AF360310                            | 249201_at   | 1.4 |
| putative protein similar to unknown protein (pir T02918); supported by full-length cDNA: Ceres: 26596.                                    | 249122_at   | 1.4 |
| ATP dependent copper transporter ; supported by cDNA: gi_14194134_gb_AF367273.1_AF367273                                                  | 249027_at   | 1.4 |
| putative protein strong similarity to unknown protein (emb CAB87688.1)                                                                    | 248817_at   | 1.4 |
| unknown protein                                                                                                                           | 248743_at   | 1.4 |
| putative protein contains similarity to CONSTANS homologs                                                                                 | 248744_at   | 1.4 |
| ADPG pyrophosphorylase small subunit (gb AAC39441.1) ; supported by cDNA: gi_15146247_gb_AY049265.1_                                      | 248687_at   | 1.4 |
| putative protein similar to unknown protein (sp O15736)                                                                                   | 248543_at   | 1.4 |
| DEAD-box protein abstract                                                                                                                 | 248442_at   | 1.4 |
| cleavage and polyadenylation specificity factor subunit                                                                                   | 248418_at   | 1.4 |
| prolyl tRNA synthetase                                                                                                                    | 248339_at   | 1.4 |
| unknown protein ; supported by cDNA: gi_15810027_gb_AY054282.1_                                                                           | 248289_at   | 1.4 |
| cyclic nucleotide-regulated ion channel (emb CAA76178.1) ; supported by cDNA: gi_13877752_gb_AF370139.1_AF370139                          | 248250_at   | 1.4 |
| flavonol 3-O-glucosyltransferase-like                                                                                                     | 248185_at   | 1.4 |
| pyruvate decarboxylase (gb AAB16855.1)                                                                                                    | 248138_at   | 1.4 |
| trigger factor-like protein                                                                                                               | 248094_at   | 1.4 |
| putative protein contains similarity to actin                                                                                             | 247997_at   | 1.4 |
| putative protein similar to unknown protein (gb AAF04433.1);supported by full-length cDNA: Ceres:156439.                                  | 247944_at   | 1.4 |
| unknown protein                                                                                                                           | 247859_at   | 1.4 |
| ABC transporter homolog PnATH - like PnATHABC transporter homolog, Populus nigra, EMBL:AB041505                                           | 247593_at   | 1.4 |
| putative protein Atu, Drosophila melanogaster, EMBL:DMU75467                                                                              | 247565_at   | 1.4 |
| RNA-binding protein - like RNA-binding protein, Nicotiana sylvestris, PIR:S46286; supported by cDNA: gi_16974555_gb_AY060565.1_           | 247575_at   | 1.4 |
| pyrophosphate-dependent phosphofructo-1-kinase - like protein pyrophosphate-dependent phosphofructo-1-kinase, Prunus armeniaca, EMB       | 247534_at   | 1.4 |
| ARF1-binding protein ; supported by cDNA: gi_2245393_gb_U89771.1_ATU89771                                                                 | 247468_at   | 1.4 |
| proteasome regulatory subunit-like ; supported by cDNA: gi_17063180_gb_AY062113.1_                                                        | 247257_at   | 1.4 |
| trehalose-6-phosphate phosphatase                                                                                                         | 247228_at   | 1.4 |
| DNA binding protein TGA1a homolog ;supported by full-length cDNA: Ceres:31032.                                                            | 247199_at   | 1.4 |
| 2-oxoglutarate dehydrogenase, E1 component                                                                                                | 247155_at   | 1.4 |
| unknown protein                                                                                                                           | 247063_at   | 1.4 |
| anthranilate N-hydroxycinnamoyl/benzoyltransferase-like protein ;supported by full-length cDNA: Ceres:32856.                              | 247038_at   | 1.4 |
| putative protein predicted protein, Oryza sativa                                                                                          | 246909_at   | 1.4 |
| farnesylated protein ATFP6-like protein farnesylated protein ATFP6 - Arabidopsis thaliana, EMBL:U64909                                    | 246429_at   | 1.4 |
| putative protein hnRNP A/B related protein - Felis catus, EMBL:AF153444; supported by cDNA: gi_14194148_gb_AF367280.1_AF367280            | 246292_at   | 1.4 |
| putative protein                                                                                                                          | 246283_at   | 1.4 |
| putative protein ;supported by full-length cDNA: Ceres:13475.                                                                             | 246225_at   | 1.4 |
| putative protein hypothetical protein F2A19.120 - Arabidopsis thaliana, PIR:T47944                                                        | 246173_s_at | 1.4 |
| putative protein CD2 cytoplasmic domain binding protein - Homo sapiens, EMBL:AF104222;supported by full-length cDNA: Ceres:13887.         | 245887_at   | 1.4 |
| ferredoxin-dependent glutamate synthase ; supported by cDNA: gi_3869250_gb_U39287.1_ATU39287                                              | 245701_at   | 1.4 |
| RNA-binding protein-like                                                                                                                  | 245714_at   | 1.4 |
| pyruvate,orthophosphate dikinase                                                                                                          | 245628_at   | 1.4 |
| ATP-dependent Clp protease proteolytic subunit (ClpR4), putative similar to ATP-dependent Clp protease proteolytic subunit Gi:7264063 for | 245400_at   | 1.4 |
| putative protein similarity to ALR - Homo sapiens~contains EST gb:Aa39558600                                                              | 245237_at   | 1.4 |
| small nuclear ribonucleoprotein U1A identical to GB:Z49991; supported by cDNA: gi_15450590_gb_AY052663.1_                                 | 245124_at   | 1.4 |
| unknown protein ; supported by cDNA: gi_16930450_gb_AF419579.1_AF419579                                                                   | 245119_at   | 1.4 |
| putative xylose kinase                                                                                                                    | 263773_at   | 1.4 |
| metal ion transporter, putative similar to metal ion transporter Gi:5853313 from [Arabidopsis thaliana]                                   | 261845_at   | 1.4 |

|                                                                                                                                                    |             |     |
|----------------------------------------------------------------------------------------------------------------------------------------------------|-------------|-----|
| unknown protein ; supported by cDNA: gi_15450835_gb_AY054498.1_                                                                                    | 261127_at   | 1.3 |
| hypothetical protein ; supported by cDNA: gi_12659317_gb_AF331066.1_AF331066                                                                       | 259512_at   | 1.3 |
| hypothetical protein predicted by genscan; similar to SPIQ09298 YQO9_CAEEL                                                                         | 267632_at   | 1.3 |
| putative RING zinc finger protein                                                                                                                  | 267581_at   | 1.3 |
| hypothetical protein predicted by genscan                                                                                                          | 267508_at   | 1.3 |
| unknown protein                                                                                                                                    | 267073_at   | 1.3 |
| unknown protein ;supported by full-length cDNA: Ceres:39666.                                                                                       | 266848_at   | 1.3 |
| 60S ribosomal protein L30 ;supported by full-length cDNA: Ceres:34564.                                                                             | 266822_at   | 1.3 |
| putative amino acid acetyltransferase                                                                                                              | 266826_at   | 1.3 |
| unknown protein ; supported by cDNA: gi_14030738_gb_AF375460.1_AF375460                                                                            | 266617_at   | 1.3 |
| putative splicing factor ;supported by full-length cDNA: Ceres:16224.                                                                              | 266534_at   | 1.3 |
| ferredoxin-dependent glutamate synthase (GLU2)                                                                                                     | 266365_at   | 1.3 |
| unknown protein                                                                                                                                    | 266389_s_at | 1.3 |
| putative ubiquitin activating enzyme                                                                                                               | 266333_at   | 1.3 |
| unknown protein                                                                                                                                    | 266189_at   | 1.3 |
| unknown protein ;supported by full-length cDNA: Ceres:39558.                                                                                       | 266170_at   | 1.3 |
| unknown protein                                                                                                                                    | 265807_at   | 1.3 |
| Expressed protein ; supported by full-length cDNA: Ceres: 157460.                                                                                  | 265770_at   | 1.3 |
| putative MYB family transcription factor                                                                                                           | 265700_at   | 1.3 |
| putative glucan synthase                                                                                                                           | 265729_at   | 1.3 |
| putative cellular apoptosis susceptibility protein                                                                                                 | 265453_at   | 1.3 |
| putative chloroplast outer membrane protein                                                                                                        | 265412_at   | 1.3 |
| hypothetical protein predicted by genscan;supported by full-length cDNA: Ceres:25903.                                                              | 265100_at   | 1.3 |
| branched-chain alpha-keto acid decarboxylase E1 beta subunit similar to Bovine branched chain alpha-keto acid dehydrogenase (BCKDHB) I             | 265070_at   | 1.3 |
| Rubisco subunit binding-protein beta subunit identical to chaperonin 60 beta precursor GB:JT0901 from [Arabidopsis thaliana]; supported by c       | 265076_at   | 1.3 |
| unknown protein Contains similarity to pre-mRNA processing protein PRP39 gb L29224 from S. cerevisiae. ESTs gb R64908 and gb T88158                | 265036_at   | 1.3 |
| myrosinase binding protein, putative similar to myrosinase binding protein GI:1711295 from [Brassica napus]                                        | 265053_at   | 1.3 |
| hypothetical protein predicted by genemark.hmm                                                                                                     | 264913_at   | 1.3 |
| unknown protein similar to unknown protein GB:AAD20911;supported by full-length cDNA: Ceres:30006.                                                 | 264835_at   | 1.3 |
| putative ligand-gated ion channel protein Similar to Arabidopsis putative ion-channel PID:g2262157 (gb AC002329); supported by cDNA: gi_5          | 264587_at   | 1.3 |
| unknown protein                                                                                                                                    | 264563_s_at | 1.3 |
| unknown protein ; supported by cDNA: gi_13430435_gb_AF360130.1_AF360130                                                                            | 264548_at   | 1.3 |
| unknown protein similar to salt-inducible protein (gi 375717); similar to ESTs gb R30192 and gb AA651017                                           | 264452_at   | 1.3 |
| hypothetical protein predicted by genefinder; supported by cDNA: gi_15983441_gb_AF424595.1_AF424595                                                | 264408_at   | 1.3 |
| unknown protein similarity to stromal cell-derived factor 2, Mus musculus, PIR2:JC5105; contains EST gb:T22533, AA067386, Z18160;suppc             | 264382_at   | 1.3 |
| putative isoamylase Similar to gi 1652733 glycoen operon protein GlxG from Synechocystis sp. genome gb D90908. ESTs gb H36690, gb A                | 264360_at   | 1.3 |
| hypothetical protein predicted by genemark.hmm                                                                                                     | 264268_at   | 1.3 |
| hypothetical protein predicted by genscan+                                                                                                         | 264142_at   | 1.3 |
| unknown protein ;supported by full-length cDNA: Ceres:41712.                                                                                       | 263978_at   | 1.3 |
| putative homeodomain transcription factor ; supported by cDNA: gi_13877516_gb_AF353094.1_AF353094                                                  | 263956_at   | 1.3 |
| unknown protein ;supported by full-length cDNA: Ceres:20834.                                                                                       | 263755_at   | 1.3 |
| hypothetical protein predicted by genefinder;supported by full-length cDNA: Ceres:119045.                                                          | 263538_at   | 1.3 |
| hypothetical protein predicted by genscan                                                                                                          | 263488_at   | 1.3 |
| putative RING zinc finger protein                                                                                                                  | 263424_at   | 1.3 |
| putative nonsense-mediated mRNA decay protein ; supported by cDNA: gi_15810402_gb_AY056240.1_                                                      | 263334_at   | 1.3 |
| putative glyoxalase II                                                                                                                             | 263243_at   | 1.3 |
| hypothetical protein predicted by genefinder; supported by cDNA: gi_14423545_gb_AF387010.1_AF387010                                                | 263075_at   | 1.3 |
| lipase, putative contains Pfam profile: PF00657 Lipase/Acylhydrolase with GDSL-like motif; supported by cDNA: gi_13937188_gb_AF372946              | 262748_at   | 1.3 |
| TPR-repeat protein contains multiple TPR domains: Pfam profile: PF00515                                                                            | 262691_at   | 1.3 |
| hypothetical protein similar to GB:P49967 signal recognition particle 54 kDa subunit (Srp54-1) from [Arabidopsis thaliana];supported by full-le    | 262601_at   | 1.3 |
| hypothetical protein similar to hypothetical protein GB:AAD50049 GI:5734784 from [Arabidopsis thaliana]                                            | 262459_at   | 1.3 |
| unknown protein Similar to gb AF151884 CGI-126 protein from Homo sapiens. EST gb Z18048 comes from this gene; supported by full-length             | 262298_at   | 1.3 |
| unknown protein ; supported by cDNA: gi_16648825_gb_AY058190.1_                                                                                    | 262232_at   | 1.3 |
| Avr9 elicitor response protein, putative similar to Avr9 elicitor response protein GI:4138265 from [Nicotiana tabacum]                             | 262188_at   | 1.3 |
| peptide transporter, putative similar to peptide transporter GI:2655098 from [Hordeum vulgare]                                                     | 261937_at   | 1.3 |
| ribosomal protein L7, putative similar to ribosomal protein L7 GB:AAA03081 GI:307388 from [Homo sapiens]                                           | 261911_at   | 1.3 |
| Expressed protein ; supported by full-length cDNA: Ceres: 39481.                                                                                   | 261858_at   | 1.3 |
| unknown protein ; supported by cDNA: gi_15451153_gb_AY054657.1_                                                                                    | 261795_at   | 1.3 |
| unknown protein similar to hypothetical protein GB:CAA20583 GI:3549672 from [Arabidopsis thaliana]                                                 | 261682_at   | 1.3 |
| unknown protein                                                                                                                                    | 261295_at   | 1.3 |
| unknown protein ;supported by full-length cDNA: Ceres:158528.                                                                                      | 261253_at   | 1.3 |
| unknown protein ;supported by full-length cDNA: Ceres:6672.                                                                                        | 261153_at   | 1.3 |
| GSH-dependent dehydroascorbate reductase 1, putative similar to GB:BAA90672 from [Oryza sativa]; supported by full-length cDNA: Ceres: 261149_s_at | 261149_s_at | 1.3 |
| unknown protein ; supported by cDNA: gi_16974626_gb_AY060591.1_                                                                                    | 260989_at   | 1.3 |
| hypothetical protein similar to hypothetical protein GB:AAB67625 GI:2342727 from [Arabidopsis thaliana]; supported by full-length cDNA: Cere       | 260840_at   | 1.3 |
| unknown protein ; supported by cDNA: gi_15028086_gb_AY045900.1_                                                                                    | 260832_at   | 1.3 |
| storage protein, putative similar to GB:CAA53781 from [Dioscorea cayenensis] (Plant Mol. Biol. 28 (3), 369-380 (1995)); supported by cDNA:         | 260626_at   | 1.3 |
| poly(A)-specific ribonuclease, putative similar to GB:CAA06683 from [Homo sapiens]                                                                 | 260593_at   | 1.3 |
| unknown protein                                                                                                                                    | 260436_at   | 1.3 |
| unknown protein identical to most of OBP32pep protein (fragment) GB:S71212 [Arabidopsis thaliana];supported by full-length cDNA: Ceres:2:          | 260304_at   | 1.3 |
| unknown protein ; supported by cDNA: gi_13878054_gb_AF370290.1_AF370290                                                                            | 260157_at   | 1.3 |
| putative RNA-binding protein contains Pfam profile: PF00076 RNA recognition motif. (aka RRM, RBD, or RNP domain); similar to putative pr           | 260160_at   | 1.3 |
| unknown protein                                                                                                                                    | 259993_at   | 1.3 |
| putative protein kinase C-terminal region similar to MAP3K delta-1 protein kinase GB:CAA74591 [Arabidopsis thaliana]; contains Pfam profile:       | 259957_at   | 1.3 |
| leucine-rich repeat transmembrane protein kinase 1, putative similar to GI:3360289 from [Zea mays] (Plant Mol. Biol. 37 (5), 749-761 (1998))       | 259958_at   | 1.3 |
| putative UDP-glucose:glycoprotein glucosyltransferase similar to UDP-glucose:glycoprotein glucosyltransferase precursor GB:Q09332 [Droso           | 259936_at   | 1.3 |
| transfactor, putative similar to GI:4519671 from [Nicotiana tabacum]                                                                               | 259832_at   | 1.3 |
| unknown protein                                                                                                                                    | 259835_at   | 1.3 |
| unknown protein                                                                                                                                    | 259689_x_at | 1.3 |
| unknown protein ; supported by cDNA: gi_15293080_gb_AY050974.1_                                                                                    | 259666_at   | 1.3 |
| spindly (gibberellin signal transduction protein) identical to spindly GB:AAC49446 [Arabidopsis thaliana]; supported by cDNA: gi_1589777_gb        | 259259_at   | 1.3 |
| homeobox-leucine zipper protein HAT5 (HD-ZIP protein 5) (HD-ZIP protein ATHB-1) identical to homeobox-leucine zipper protein HAT5 (HD-             | 259165_at   | 1.3 |
| unknown protein ;supported by full-length cDNA: Ceres:801.                                                                                         | 259055_at   | 1.3 |

|                                                                                                                                                |             |     |
|------------------------------------------------------------------------------------------------------------------------------------------------|-------------|-----|
| unknown protein ;supported by full-length cDNA: Ceres:105296.                                                                                  | 258990_at   | 1.3 |
| putative ribosome recycling factor similar to ribosome recycling factor gene (RRF) GB:BAA76865 [Thermus thermophilus]                          | 258996_at   | 1.3 |
| hypothetical protein predicted by genscan+                                                                                                     | 258946_at   | 1.3 |
| hypothetical protein predicted by genscan                                                                                                      | 258844_at   | 1.3 |
| unknown protein                                                                                                                                | 258687_at   | 1.3 |
| acetyl-coA dehydrogenase, putative similar to acetyl-coenzyme A dehydrogenase GB:NP_031408 from [Mus musculus]                                 | 258524_at   | 1.3 |
| hypothetical protein                                                                                                                           | 258533_at   | 1.3 |
| expressed protein supported by cDNA: gi:14194102                                                                                               | 258444_at   | 1.3 |
| putative protein kinase similar to mitogen activated protein kinase kinase GB:AAC32599 from [Oryza sativa];supported by full-length cDNA: C    | 258456_at   | 1.3 |
| putative protein disulfide isomerase similar to protein disulfide isomerase GB:AAD55566 from [Volvox carteri f. nagariensis]                   | 258329_at   | 1.3 |
| putative ethylene-inducible protein similar to ethylene-inducible protein GB:M88254 from [Hevea brasiliensis]; supported by cDNA: gi_410395    | 258336_at   | 1.3 |
| unknown protein                                                                                                                                | 258263_at   | 1.3 |
| hypothetical protein contains Pfam profile: PF01055 Glycosyl hydrolases family 31; supported by cDNA: gi_16648902_gb_AY059821.1_               | 258109_at   | 1.3 |
| putative MAP Kinase similar to GB:AAD52659 from [Oryza sativa]                                                                                 | 258119_at   | 1.3 |
| putative cytochrome P450 similar to GB:Q05047 from [Catharanthus roseus]; supported by cDNA: gi_15292786_gb_AY050827.1_                        | 258094_at   | 1.3 |
| FtsH protease, putative contains similarity to cell division protein FtsH GI:1652085 from [Synechocystis sp. PCC 6803]                         | 258048_at   | 1.3 |
| hypothetical protein predicted by genemark                                                                                                     | 257948_at   | 1.3 |
| Expressed protein ; supported by cDNA: gi_16604419_gb_AY058108.1_                                                                              | 257914_at   | 1.3 |
| protein phosphatase-2c, putative similar to protein phosphatase-2c GB:AAC35951 [Mesembryanthemum crystallinum]; contains Pfam profile:         | 257887_at   | 1.3 |
| unknown protein contains an RNase_PH domain;supported by full-length cDNA: Ceres:104182.                                                       | 257857_s_at | 1.3 |
| unknown protein                                                                                                                                | 257803_at   | 1.3 |
| unknown protein                                                                                                                                | 257717_at   | 1.3 |
| unknown protein contains Pfam profile: PF00515 tetratricopeptide repeat domain (TPR domain);supported by full-length cDNA: Ceres:23733.        | 257730_at   | 1.3 |
| unknown protein contains Pfam profiles: PF01388 ARID DNA binding domain, PF00505 HMG (high mobility group) box;supported by full-length        | 257655_at   | 1.3 |
| hemolysin-like protein similar to hemolysin C GB:Q54318 [Brachyspira hyodysenteriae]                                                           | 257178_at   | 1.3 |
| Expressed protein ; supported by cDNA: gi_15215805_gb_AY050432.1_                                                                              | 257007_at   | 1.3 |
| unknown protein contains PF00612 IQ:IQ calmodulin-binding motif                                                                                | 256822_at   | 1.3 |
| hypothetical protein predicted by genemark.hmm                                                                                                 | 256792_at   | 1.3 |
| protein kinase, putative contains Pfam profile: PF00069: Eukaryotic protein kinase domain                                                      | 256529_at   | 1.3 |
| unknown protein ;supported by full-length cDNA: Ceres:33407.                                                                                   | 256440_at   | 1.3 |
| lipid transfer protein, putative similar to lipid transfer protein GI:9279661 from [Arabidopsis thaliana]; supported by cDNA: gi_15028044_gb_A | 256145_at   | 1.3 |
| unknown protein ; supported by cDNA: gi_14532715_gb_AY039982.1_                                                                                | 256074_at   | 1.3 |
| ubiquitin, putative similar to ubiquitin GI:10177083 from [Arabidopsis thaliana]; supported by cDNA: gi_16974595_gb_AY060574.1_                | 256071_at   | 1.3 |
| ABC transporter, putative similar to ABC transporter GI:10280532 from [Homo sapiens]                                                           | 255889_at   | 1.3 |
| putative WD repeat membrane protein ; supported by cDNA: gi_15912316_gb_AY056436.1_                                                            | 255711_at   | 1.3 |
| Shaggy related protein kinase tetha ; supported by cDNA: gi_17063157_gb_AY062099.1_                                                            | 255635_at   | 1.3 |
| putative protein predicted protein, Arabidopsis thaliana and various predicted ATP dependent RNA helicases                                     | 255600_s_at | 1.3 |
| putative NAM-like protein                                                                                                                      | 255585_at   | 1.3 |
| hypothetical protein similar to C. elegans protein B0414.8, GenBank accession number 2088768                                                   | 255560_at   | 1.3 |
| coded for by A. thaliana cDNA T04215 similar to epoxide hydrolases                                                                             | 255525_at   | 1.3 |
| hypothetical protein                                                                                                                           | 255526_at   | 1.3 |
| putative protein                                                                                                                               | 255527_at   | 1.3 |
| putative cullin-like 1 protein similar to O. sativa cullin-like proteins; supported by cDNA: gi_15028160_gb_AY046030.1_                        | 255441_at   | 1.3 |
| putative host response protein pir7a protein - rice, PIR2:S47086                                                                               | 255025_at   | 1.3 |
| polyubiquitin-like protein polyubiquitin 6 - red alga (Gracilaria verrucosa), PIR2:S53719                                                      | 254822_at   | 1.3 |
| putative protein phospho-N-acetylmuramoyl-pentapeptide-transferase, Haemophilus influenzae,Pir2:A64185                                         | 254662_at   | 1.3 |
| initiation factor-2Bepsilon-like protein initiation factor-2Be, Rattus norvegicus, PATCHX:G924597                                              | 254664_at   | 1.3 |
| putative protein                                                                                                                               | 254645_at   | 1.3 |
| RNase L inhibitor-like protein RNase L inhibitor (clone 8), Homo sapiens                                                                       | 254615_at   | 1.3 |
| hypothetical protein                                                                                                                           | 254501_at   | 1.3 |
| hypothetical protein                                                                                                                           | 254502_at   | 1.3 |
| 3-hydroxyisobutyrate dehydrogenase -like protein 3-hydroxyisobutyrate dehydrogenase, Rattus norvegicus, Pir:A32867;supported by full-length    | 254445_at   | 1.3 |
| putative protein hypothetical protein, chr.4, Arabidopsis thaliana, PATCHX:G2392763                                                            | 254350_at   | 1.3 |
| predicted protein PVP3 protein, Phaesolis vulgaris, PATCHX:G169363;supported by full-length cDNA: Ceres:13832.                                 | 254276_at   | 1.3 |
| NADPH-ferrihemoprotein reductase ATR1 ; supported by cDNA: gi_15451215_gb_AY054688.1_                                                          | 254127_at   | 1.3 |
| grpE like protein ;supported by full-length cDNA: Ceres:35284.                                                                                 | 253949_at   | 1.3 |
| putative protein met-10+ protein, Neurospora crassa, PIR2:S46697                                                                               | 253912_at   | 1.3 |
| hypothetical protein                                                                                                                           | 253888_at   | 1.3 |
| putative DNA-binding protein AP2 domain containing protein RAP2.4 - Arabidopsis thaliana, PID:g2281633                                         | 253799_at   | 1.3 |
| putative protein predicted protein. Arabidopsis thaliana; supported by cDNA: gi_15293152_gb_AY051010.1_                                        | 253739_at   | 1.3 |
| X-Pro dipeptidase - like protein (fragment) X-Pro dipeptidase, Homo sapiens, PIR2:A32454                                                       | 253704_at   | 1.3 |
| NADPH-ferrihemoprotein reductase (ATR2)                                                                                                        | 253664_at   | 1.3 |
| Expressed protein ; supported by full-length cDNA: Ceres: 7876.                                                                                | 253549_at   | 1.3 |
| putative protein tomato leucine zipper-containing protein - Lycopersicon esculentum, PIR2:S21495                                               | 253531_at   | 1.3 |
| predicted protein predicted protein on BAC T06B20; Arabidopsis thaliana chromosome II; PATCHX:G1946371                                         | 253501_at   | 1.3 |
| putative protein prolyl 4-hydroxylase alpha(II)-subunit, Mus musculus, PIR2:I49135;supported by full-length cDNA: Ceres:2306.                  | 253321_at   | 1.3 |
| protein kinase - like protein protein kinase, 41K, Arabidopsis thaliana,PIR2:S71172; supported by cDNA: gi_15451087_gb_AY054624.1_             | 253264_at   | 1.3 |
| L-ascorbate peroxidase ;supported by full-length cDNA: Ceres:21896.                                                                            | 253223_at   | 1.3 |
| putative ubiquitin-dependent proteolytic protein ubiquitin fusion-degradation protein - Mus musculus, PID:g1654348; supported by cDNA: gi_     | 252931_at   | 1.3 |
| starch phosphorylase H (cytosolic form) - like protein starch phosphorylase H, cytosolic isoform, Vicia faba, PIR:T12091; supported by cDNA    | 252468_at   | 1.3 |
| putative protein br-1 protein (NITRIC OXIDE SYNTHASE) - Helix pomatia,PID:e234055                                                              | 252410_at   | 1.3 |
| putative transcription factor MYB94 ; supported by cDNA: gi_3941527_gb_AF062918.1_AF062918                                                     | 252408_at   | 1.3 |
| hypothetical protein                                                                                                                           | 252362_at   | 1.3 |
| putative protein CRP1 protein, Zea mays, gb:AAC25599                                                                                           | 252305_at   | 1.3 |
| putative protein lea32, Arabidopsis thaliana, EMBL:ATH131342;supported by full-length cDNA: Ceres:35969.                                       | 252229_at   | 1.3 |
| U1 snRNP 70K protein ; supported by cDNA: gi_14532499_gb_AY039874.1_                                                                           | 252182_at   | 1.3 |
| putative protein hypothetical protein F16F14.4 - Arabidopsis thaliana: EMBL:AC007047; supported by cDNA: gi_14423521_gb_AF386998.1_            | 252097_at   | 1.3 |
| mucin -like protein hemomucin, Drosophila melanogaster, EMBL:DM42014;supported by full-length cDNA: Ceres:34197.                               | 252117_at   | 1.3 |
| receptor-protein kinase-like protein receptor-like protein kinase, Catharanthus roseus, PIR:T10060; supported by cDNA: gi_14334759_gb_A)       | 252066_at   | 1.3 |
| putative protein predicted protein, Arabidopsis thaliana                                                                                       | 251937_at   | 1.3 |
| putative protein predicted proteins, Arabidopsis thaliana                                                                                      | 251951_s_at | 1.3 |
| beta-ketoacyl-ACP reductase - like protein beta-ketoacyl-ACP reductase, Cuphea lanceolata, EMBL:X64566                                         | 251780_s_at | 1.3 |
| putative protein translation releasing factor RF-2 - Synechocystis sp., PIR:S76448                                                             | 251670_at   | 1.3 |

|                                                                                                                                                       |             |     |
|-------------------------------------------------------------------------------------------------------------------------------------------------------|-------------|-----|
| hypothetical protein                                                                                                                                  | 251614_at   | 1.3 |
| putative protein ferritin 1 precursor - Arabidopsis thaliana, EMBL:X94248                                                                             | 251347_at   | 1.3 |
| putative protein putative protein BcDNA.GH03694 - Drosophila melanogaster, EMBL:AF181626                                                              | 251316_s_at | 1.3 |
| putative protein putative protein F26O13.260 - Arabidopsis thaliana, EMBL:AL133452                                                                    | 251333_at   | 1.3 |
| ARGININE/SERINE-RICH SPLICING FACTOR RSP31 ; supported by cDNA: gi_16612267_gb_AF439831.1_AF439831                                                    | 251242_at   | 1.3 |
| putative protein phytochrome-associated protein 3 (PAP3) - Arabidopsis thaliana, EMBL:AF088280                                                        | 251245_at   | 1.3 |
| ATP-dependent RNA helicase-like protein ATP-dependent RNA helicase (EC 3.6.-.-) - Homo sapiens, PIR:JC5785                                            | 251265_at   | 1.3 |
| putative protein predicted protein, Arabidopsis thaliana; supported by cDNA: gi_14334781_gb_AY035064.1_                                               | 251153_at   | 1.3 |
| putative protein hypothetical proteins - Arabidopsis thaliana                                                                                         | 251078_at   | 1.3 |
| putative protein histone H2A, garden pea, PIR:JQ1183; supported by full-length cDNA: Ceres:1553.                                                      | 251011_at   | 1.3 |
| putative protein various predicted proteins, Arabidopsis thaliana; supported by full-length cDNA: Ceres:98672.                                        | 250931_at   | 1.3 |
| putative protein contains similarity to unknown protein (gb AAF19567.1)                                                                               | 250809_at   | 1.3 |
| SET-domain protein-like ; supported by cDNA: gi_13517742_gb_AF344444.1_AF344444                                                                       | 250817_at   | 1.3 |
| arginine-tRNA-protein transferase 1 homolog ; supported by cDNA: gi_3806097_gb_AF079100.1_AF079100                                                    | 250754_at   | 1.3 |
| ankyrin-like protein                                                                                                                                  | 250761_at   | 1.3 |
| cell division related protein-like                                                                                                                    | 250711_at   | 1.3 |
| splicing factor 3a ; supported by cDNA: gi_14532639_gb_AY039944.1_                                                                                    | 250715_at   | 1.3 |
| putative protein similar to unknown protein (gb AAF32477.1); supported by full-length cDNA: Ceres:117588.                                             | 250737_at   | 1.3 |
| diadenosine 5,5-P1,P4-tetraphosphate hydrolase-like protein ; supported by cDNA: gi_13937174_gb_AF372941.1_AF372941                                   | 250705_at   | 1.3 |
| alpha-hydroxynitrile lyase-like protein alpha-hydroxynitrile lyase HNL4 - Manihot esculenta, EMBL:AJ223281; supported by cDNA: gi_150281              | 250483_at   | 1.3 |
| putative protein NLI-interacting factor isoform T1, Gallus gallus, EMBL:AF189773; supported by full-length cDNA: Ceres:151766.                        | 250298_at   | 1.3 |
| CCAAT box binding factor/ transcription factor Hap2a                                                                                                  | 250320_at   | 1.3 |
| unknown protein                                                                                                                                       | 250232_at   | 1.3 |
| unknown protein ; supported by cDNA: gi_15215581_gb_AY050319.1_                                                                                       | 250211_at   | 1.3 |
| putative protein amino acid transport protein, Arabidopsis thaliana, EMBL:U39783                                                                      | 250161_at   | 1.3 |
| Expressed protein ; supported by cDNA: gi_16648944_gb_AY059842.1_                                                                                     | 250134_at   | 1.3 |
| GTP-binding protein obg-like GTP-binding protein obg, Bacillus subtilis, PIR:B32804                                                                   | 249993_at   | 1.3 |
| squamosa promoter binding protein-like 7 ; supported by cDNA: gi_13605911_gb_AF367355.1_AF367355                                                      | 249960_at   | 1.3 |
| alkaline/neutral invertase ; supported by cDNA: gi_15912342_gb_AY056449.1_                                                                            | 249898_at   | 1.3 |
| putative protein 5 -AMP-ACTIVATED PROTEIN KINASE, BETA-1 SUBUNIT, pig, SWISSPROT:AAKB_PIG; supported by cDNA: gi_169743;                              | 249425_at   | 1.3 |
| 40S ribosomal protein S9-like 40S ribosomal protein S9 - Chlamydomonas sp., EMBL:AU066528; supported by full-length cDNA: Ceres:41406                 | 249427_at   | 1.3 |
| protein import receptor TOM20, mitochondrial-like                                                                                                     | 249322_at   | 1.3 |
| GAMM1 protein-like ; supported by cDNA: gi_15146291_gb_AY049287.1_                                                                                    | 249238_at   | 1.3 |
| unknown protein                                                                                                                                       | 249019_at   | 1.3 |
| putative protein strong similarity to unknown protein (pir T05077); supported by full-length cDNA: Ceres:111998.                                      | 248871_at   | 1.3 |
| Lon protease homolog 1 precursor identical to Lon protease homolog 1 mitochondrial precursor SP:O64948 from [Arabidopsis thaliana]                    | 248818_at   | 1.3 |
| unknown protein                                                                                                                                       | 248771_at   | 1.3 |
| unknown protein                                                                                                                                       | 248694_at   | 1.3 |
| putative protein strong similarity to unknown protein (pir T09376)                                                                                    | 248630_at   | 1.3 |
| putative protein contains similarity to unknown protein (pir T01052)                                                                                  | 248616_at   | 1.3 |
| ATP-dependent Clp protease ATP-binding subunit ClpX2, putative similar to CLP protease regulatory subunit CLPX GI:2674203 from [Arabidopsis thaliana] | 248575_at   | 1.3 |
| putative protein contains similarity to salt-inducible protein                                                                                        | 248547_at   | 1.3 |
| Notchless protein homolog                                                                                                                             | 248326_at   | 1.3 |
| O-methyltransferase ; supported by full-length cDNA: Ceres:33790.                                                                                     | 248200_at   | 1.3 |
| putative protein similar to unknown protein (pir T05472); supported by full-length cDNA: Ceres:30073.                                                 | 248148_at   | 1.3 |
| DNA topoisomerase I (sp P30181)                                                                                                                       | 248099_at   | 1.3 |
| putative protein similar to unknown protein (ref NP_004583.1); supported by cDNA: gi_14532719_gb_AY039984.1_                                          | 248106_at   | 1.3 |
| HEAT SHOCK PROTEIN 81-2 (HSP81-2) (sp P55737)                                                                                                         | 248045_at   | 1.3 |
| transcription factor-like; similar to CH6 and COP9 complex subunit 6 ; supported by cDNA: gi_15809662_gb_AY048692.1_                                  | 248009_at   | 1.3 |
| unknown protein                                                                                                                                       | 247992_at   | 1.3 |
| profilin-like protein ; supported by full-length cDNA: Ceres:102364.                                                                                  | 247964_at   | 1.3 |
| Expressed protein ; supported by full-length cDNA: Ceres:99033.                                                                                       | 247792_at   | 1.3 |
| putative protein predicted proteins, Arabidopsis thaliana                                                                                             | 247698_at   | 1.3 |
| aspartyl aminopeptidase - like protein aspartyl aminopeptidase, Homo sapiens, EMBL:AF005050; supported by full-length cDNA: Ceres:1265.               | 247624_at   | 1.3 |
| putative protein supported by cDNA: Ceres:146274.                                                                                                     | 247491_at   | 1.3 |
| peroxisomal Ca-dependent solute carrier - like protein peroxisomal Ca-dependent solute carrier, Oryctolagus cuniculus, EMBL:AF004161; su              | 247498_at   | 1.3 |
| unknown protein                                                                                                                                       | 247393_at   | 1.3 |
| putative protein similar to unknown protein (pir T00246)                                                                                              | 247277_at   | 1.3 |
| putative protein similar to unknown protein (gb AAB71479.1 )                                                                                          | 247062_at   | 1.3 |
| putative protein contains similarity to MYB-like DNA-binding protein; supported by cDNA: gi_14532517_gb_AY039883.1_                                   | 247012_at   | 1.3 |
| unknown protein ; supported by full-length cDNA: Ceres:8440.                                                                                          | 246953_at   | 1.3 |
| putative protein                                                                                                                                      | 246926_at   | 1.3 |
| acid phosphatase-like protein purple acid phosphatase - Ipomoea batatas, EMBL:AJ006224; supported by cDNA: gi_15292756_gb_AY0508.                     | 246636_at   | 1.3 |
| putative protein ; supported by full-length cDNA: Ceres:38281.                                                                                        | 246612_at   | 1.3 |
| putative protein SART-1 protein - Homo sapiens, PIR:T00034                                                                                            | 246447_at   | 1.3 |
| unknown protein                                                                                                                                       | 246286_at   | 1.3 |
| hypothetical protein ; supported by full-length cDNA: Ceres:108940.                                                                                   | 246196_at   | 1.3 |
| G-box-binding factor 1 ; supported by cDNA: gi_15450987_gb_AY054574.1_                                                                                | 246211_at   | 1.3 |
| IPP transferase - like protein tRNA delta(2)-isopentenylpyrophosphate transferase (IPP transferase), Pseudomonas putida, EMBL:AF016312                | 246152_at   | 1.3 |
| putative protein VAC8 protein, Saccharomyces cerevisiae, PIR:S50446                                                                                   | 246062_at   | 1.3 |
| 24 kDa vacuolar protein - like 24 kDa vacuolar protein VP24, Ipomoea batatas, EMBL:AB025531                                                           | 245991_at   | 1.3 |
| pinorensin-laricresinol reductase, putative similar to pinorensin-laricresinol reductase GB:AAF63508 GI:7542583 from [Thuja plicata]; supp            | 245792_at   | 1.3 |
| hypothetical protein predicted by genemark.hmm                                                                                                        | 245724_at   | 1.3 |
| Expressed protein ; supported by cDNA: gi_11762135_gb_AF324994.1_AF324994                                                                             | 245684_at   | 1.3 |
| Expressed protein ; supported by cDNA: gi:14423393                                                                                                    | 245521_at   | 1.3 |
| hypothetical protein                                                                                                                                  | 245481_at   | 1.3 |
| Expressed protein ; supported by full-length cDNA: Ceres:16319.                                                                                       | 245373_s_at | 1.3 |
| casein kinase I ; supported by cDNA: gi_15450524_gb_AY052364.1_                                                                                       | 245294_at   | 1.3 |
| hypothetical protein ; supported by cDNA: gi_16323154_gb_AY057681.1_                                                                                  | 245272_at   | 1.3 |
| photolyase/blue-light receptor (PHR2) ; supported by full-length cDNA: Ceres:34800.                                                                   | 245150_at   | 1.3 |
| cytochrome c biogenesis orf206                                                                                                                        | 244945_at   | 1.3 |
| unknown protein                                                                                                                                       | 258783_at   | 1.3 |
| unknown protein                                                                                                                                       | 256013_at   | 1.3 |

|                                                                                                                                               |             |     |
|-----------------------------------------------------------------------------------------------------------------------------------------------|-------------|-----|
| putative protein contains similarity to (pir) T14814)                                                                                         | 248901_at   | 1.3 |
| unknown protein ;supported by full-length cDNA: Ceres:106330.                                                                                 | 259153_at   | 1.2 |
| NAM-like protein (no apical meristem) similar to NAM GB:CAA63101 [Petunia x hybrida]; supported by full-length cDNA: Ceres: 119460.           | 258813_at   | 1.2 |
| hypothetical protein predicted by genscan+                                                                                                    | 257073_at   | 1.2 |
| unknown protein ;supported by full-length cDNA: Ceres:35578.                                                                                  | 267504_at   | 1.2 |
| unknown protein ; supported by cDNA: gi_15450620_gb_AY052678.1_                                                                               | 267468_at   | 1.2 |
| putative receptor-like protein kinase                                                                                                         | 267477_at   | 1.2 |
| putative protein kinase contains a protein kinase domain profile (PDOC00100); supported by cDNA: gi_2852448_dbj_D88207.1_D88207               | 267486_at   | 1.2 |
| putative phosphoribosyl pyrophosphate synthetase                                                                                              | 267365_at   | 1.2 |
| putative isoamylase                                                                                                                           | 267356_at   | 1.2 |
| putative acetone-cyanohydrin lyase                                                                                                            | 267127_at   | 1.2 |
| putative MYB family transcription factor                                                                                                      | 267141_at   | 1.2 |
| hypothetical protein predicted by genscan                                                                                                     | 266962_at   | 1.2 |
| unknown protein                                                                                                                               | 266934_at   | 1.2 |
| unknown protein                                                                                                                               | 266855_at   | 1.2 |
| F-box protein family, AtFBX5 contains similarity to F-box protein FBL2 GI:6010699 from [Rattus norvegicus]                                    | 266815_at   | 1.2 |
| unknown protein ;supported by full-length cDNA: Ceres:26655.                                                                                  | 266657_at   | 1.2 |
| putative zinc-finger protein (B-box zinc finger domain)                                                                                       | 266514_at   | 1.2 |
| hypothetical protein                                                                                                                          | 266304_at   | 1.2 |
| hypothetical protein predicted by genscan and genefinder; supported by cDNA: gi_13605570_gb_AF361611.1_AF361611                               | 266182_at   | 1.2 |
| putative helicase ; supported by cDNA: gi_16648974_gb_AY059857.1_                                                                             | 266122_at   | 1.2 |
| putative alcohol dehydrogenase                                                                                                                | 266087_at   | 1.2 |
| unknown protein ;supported by full-length cDNA: Ceres:40538.                                                                                  | 266093_at   | 1.2 |
| putative methionyl-tRNA synthetase ; supported by cDNA: gi_14334467_gb_AY034925.1_                                                            | 266057_at   | 1.2 |
| unknown protein unusual splice site at second intron; GA instead of conserved GT at donor site                                                | 266060_at   | 1.2 |
| hypothetical protein predicted by genscan and genefinder                                                                                      | 265957_at   | 1.2 |
| Expressed protein ; supported by full-length cDNA: Ceres: 465.                                                                                | 265913_at   | 1.2 |
| unknown protein ; supported by cDNA: gi_14334541_gb_AY035175.1_                                                                               | 265739_at   | 1.2 |
| unknown protein                                                                                                                               | 265707_at   | 1.2 |
| proline iminopeptidase identical to GP:1710151:U72711; supported by cDNA: gi_15450388_gb_AY052295.1_                                          | 265575_at   | 1.2 |
| hypothetical protein predicted by genscan and grail                                                                                           | 265429_at   | 1.2 |
| unknown protein ;supported by full-length cDNA: Ceres:39669.                                                                                  | 265388_s_at | 1.2 |
| unknown protein ESTs gb H76594 and gb H76252 come from this gene                                                                              | 265217_s_at | 1.2 |
| RNA polymerase subunit identical to RNA polymerase subunit GI:514324 from [Arabidopsis thaliana]; supported by cDNA: gi_14423463_gb_          | 264924_at   | 1.2 |
| unknown protein                                                                                                                               | 264890_at   | 1.2 |
| putative plastid RNA polymerase sigma-subunit similar to GB:BAA22427 and EST gb N65838; supported by cDNA: gi_2353172_gb_AF01554              | 264781_at   | 1.2 |
| hypothetical protein predicted by genscan; supported by cDNA: gi_15450913_gb_AY054537.1_                                                      | 264447_at   | 1.2 |
| putative glutathione S-transferase TSI-1 similar to glutathione S-transferase TSI-1 (gij2190992); similar to ESTs gb R29860, emb Z29757, an   | 264436_at   | 1.2 |
| unknown protein ; supported by cDNA: gi_15081790_gb_AY048288.1_                                                                               | 264265_at   | 1.2 |
| hypothetical protein predicted by genscan and genefinder;supported by full-length cDNA: Ceres:17483.                                          | 264111_at   | 1.2 |
| plastid division protein (FtsZ) identical to AF089738; supported by cDNA: gi_15292820_gb_AY050844.1_                                          | 263906_at   | 1.2 |
| RNA helicase, putative similar to RNA helicase GI:3776015 from [Arabidopsis thaliana]; supported by cDNA: gi_15983391_gb_AF424570.1_          | 263679_at   | 1.2 |
| unknown protein Location of ESTs 108M1477, gb T41823 and 108M14XP 3, gb AA395002; supported by cDNA: gi_14335101_gb_AY0372C                   | 263692_at   | 1.2 |
| putative protein kinase/endoribonuclease ; supported by cDNA: gi_13194577_gb_AF308596.1_AF308596                                              | 263076_at   | 1.2 |
| splicing factor, putative similar to RSZp21 protein GB:CAA05351 GI:2582643 from [Arabidopsis thaliana] (Plant Mol. Biol. 39 (4), 761-773 (19  | 263035_at   | 1.2 |
| conserved hypothetical protein                                                                                                                | 263037_at   | 1.2 |
| Expressed protein ; supported by full-length cDNA: Ceres: 18244.                                                                              | 262746_at   | 1.2 |
| unknown protein ESTs gb R90323, gb R90338, gb Z25504 and gb AA651448 come from this gene                                                      | 262576_at   | 1.2 |
| hypothetical protein predicted by genscan+                                                                                                    | 262532_at   | 1.2 |
| hypothetical protein predicted by genemark.hmm;supported by full-length cDNA: Ceres:111951.                                                   | 262453_at   | 1.2 |
| receptor protein kinase, putative similar to receptor protein kinase GI:1389566 from [Arabidopsis thaliana]                                   | 262360_at   | 1.2 |
| 26S proteasome ATPase subunit, putative similar to 26S proteasome ATPase subunit GI:1395190 from [Spinacia oleracea];supported by full        | 262227_s_at | 1.2 |
| hypothetical protein predicted by genemark.hmm                                                                                                | 262221_at   | 1.2 |
| betaine aldehyde dehydrogenase, putative similar to betaine aldehyde dehydrogenase GI:2388709 from [Amaranthus hypochondriacus];supp          | 262173_at   | 1.2 |
| hypothetical protein predicted by genemark.hmm                                                                                                | 262142_at   | 1.2 |
| glycosyl transferase, putative similar to Pfam profile: PF00534 Glycosyl transferases group 1                                                 | 262155_at   | 1.2 |
| putative heat-shock protein contains Pfam profile: PF00012 Heat shock hsp70 proteins; similar to heat-shock proteins GB:CAA94389, GB:AA       | 262054_s_at | 1.2 |
| S-ribonuclease binding protein SBP1, putative similar to S-ribonuclease binding protein SBP1 GI:6760451 from [Petunia hybrida];supported t    | 261832_at   | 1.2 |
| HD-Zip protein identical to HD-Zip protein GB:CAA71854 GI:2145358 from [Arabidopsis thaliana]                                                 | 261800_at   | 1.2 |
| hypothetical protein similar to putative protease GI:4415912 from [Arabidopsis thaliana]; supported by cDNA: gi_11993876_gb_AF329505.1_       | 261757_at   | 1.2 |
| hypothetical protein similar to hypothetical protein GB:AAD22292 GI:6598654 from [Arabidopsis thaliana]                                       | 261681_at   | 1.2 |
| LIM domain protein, putative similar to LIM domain protein PLIM-2 GB:AAD15745 GI:4321401 from [Helianthus annuus]                             | 261559_at   | 1.2 |
| unknown protein                                                                                                                               | 261424_at   | 1.2 |
| CMP-KDO synthetase, putative similar to GB:CAB89846 from [Zea mays]                                                                           | 261373_at   | 1.2 |
| unknown protein ; supported by full-length cDNA: Ceres: 117183.                                                                               | 261269_at   | 1.2 |
| hypothetical protein predicted by genemark.hmm                                                                                                | 261177_at   | 1.2 |
| unknown protein ; supported by cDNA: gi_14334841_gb_AY035094.1_                                                                               | 261107_at   | 1.2 |
| transcriptional activator RF2a, putative similar to transcriptional activator RF2a GB:AF005492 GI:2253277 from [Oryza sativa];supported by fi | 260953_at   | 1.2 |
| hypothetical protein predicted by genemark.hmm                                                                                                | 260872_at   | 1.2 |
| unknown protein                                                                                                                               | 260824_at   | 1.2 |
| peptide transporter PTR2-B, putative similar to SP:P46032 from [Arabidopsis thaliana]                                                         | 260693_at   | 1.2 |
| putative ATP-dependent RNA helicase ; supported by cDNA: gi_16323191_gb_AY057700.1_                                                           | 260532_at   | 1.2 |
| hypothetical protein similar to CCAAT-box-binding transcription factor GB:NP_005751 [Homo sapiens], GB:P53569 [Mus musculus]                  | 260425_at   | 1.2 |
| putative protein kinase similar to protein kinase APK1A GB:Q06548 [Arabidopsis thaliana]; contains Pfam profile: PF00069 Eukaryotic protein   | 260415_at   | 1.2 |
| unknown protein contains a region similar to uridine kinase GB:AAF09747 from [Deinococcus radiodurans]                                        | 260372_at   | 1.2 |
| unknown protein                                                                                                                               | 260374_at   | 1.2 |
| putative U3 small nucleolar ribonucleoprotein protein identical to putative U3 small nucleolar ribonucleoprotein protein GB:AAF07373 (Arabid  | 260323_at   | 1.2 |
| unknown protein                                                                                                                               | 260162_at   | 1.2 |
| putative protein kinase Pfam HMM hit: Eukaryotic protein kinase domain                                                                        | 260036_at   | 1.2 |
| putative trehalose-6-phosphate synthase similar to trehalose-6-phosphate synthase GB:CAA69879 [Arabidopsis thaliana]; supported by cDN/       | 260010_at   | 1.2 |
| putative ABC transporter contains Pfam profile: PF00005 ABC transporter                                                                       | 259937_s_at | 1.2 |
| unknown protein                                                                                                                               | 259945_at   | 1.2 |
| putative 3 -5' exonuclease similar to ribonuclease II RNB family protein GB:CAB16367 [Schizosaccharomyces pombe]; Pfam HMM hit: Vc            | 259704_at   | 1.2 |

unknown protein ;supported by full-length cDNA: Ceres:25703. 259639\_at 1.2

bZIP protein, putative similar to GI:600855 from [Arabidopsis thaliana] (Plant Physiol. 109 (2), 723 (1995)); supported by cDNA: gi\_15450410 259610\_at 1.2

hypothetical protein similar to hypothetical protein GI:6598642 from [Arabidopsis thaliana] 259392\_at 1.2

protein phosphatase 2A 65 kDa regulatory subunit identical to protein phosphatase 2A 65 kDa regulatory subunit GB:X82002 [Arabidopsis th 259408\_at 1.2

putative lectin contains Pfam profile: PF01419 jacalin-like lectin domain; similar to jasmonate inducible protein GB:Y11483 (Brassica napus), 259381\_s\_at 1.2

hypothetical protein predicted by genefinder 259249\_at 1.2

RNA helicase, DRH1 identical to RNA helicase DRH1 GB:BAA28347 [Arabidopsis thaliana]; supported by cDNA: gi\_15215693\_gb\_AY05037 259194\_at 1.2

lysyl-tRNA synthetase identical to lysyl-tRNA synthetase; LysRS GB:AAD17333 [Arabidopsis thaliana]; supported by cDNA: gi\_4325323\_gb\_ 259069\_at 1.2

F-box protein family, AtFBL12 contains similarity to F-box protein FBL6 GI:6456737 from [Homo sapiens] 259067\_at 1.2

unknown protein similar to putative guanine nucleotide binding protein GB:CAB08769 [Schizosaccharomyces pombe]; supported by cDNA: gi 258994\_at 1.2

putative RNA helicase similar to RNA helicase (DRH1) GB:BAA28347 [Arabidopsis thaliana]; Pfam HMM hits: WWW/rsp5/WWP domain contai 258910\_at 1.2

unknown protein similar to RNA helicase GB:AAF03534 258863\_at 1.2

unknown protein predicted by genscan, multiple est matches; supported by cDNA: gi\_15027888\_gb\_AY045801.1\_ 258801\_at 1.2

putative bZIP transcription factor contains Pfam profile: PF00170 bZIP transcription factor; contains similarity to TGACG-sequence specific DT 258759\_at 1.2

putative histone H2B similar to histone H2B-3 GB:CAA12231 from [Lycopersicon esculentum] 258707\_at 1.2

putative RING zinc finger protein contains Pfam profile: PF00097 zinc finger, C3HC4 type (RING finger); supported by full-length cDNA: Cere 258714\_at 1.2

putative GTPase activating protein contains Pfam profile: PF01412 Putative GTP-ase activating protein for Arf 258689\_at 1.2

hypothetical protein contains Pfam profile: PF01535 domain of unknown function 258573\_at 1.2

importin alpha identical to GB:AAC27644 from [Arabidopsis thaliana] (Plant Cell (1996) 8(8), 1337-1352);supported by full-length cDNA: Cere 258531\_at 1.2

putative WD-repeat protein contains Pfam profile: PF00400 WD domain, G-beta repeat (7 copies) 258268\_at 1.2

unknown protein ;supported by full-length cDNA: Ceres:15577. 258188\_at 1.2

putative sucrose cleavage protein similar to GB:S51376 from [Solanum tuberosum]supported by full-length cDNA: Ceres:40179. 257970\_at 1.2

unknown protein ; supported by full-length cDNA: Ceres: 33530. 257903\_at 1.2

protein kinase, putative similar to PROTEIN KINASE APK1A GB:Q06548 from [Arabidopsis thaliana] 257016\_at 1.2

glutamine:fructose-6-phosphate amidotransferase, putative similar to glutamine:fructose-6-phosphate amidotransferase 2 GB:BAA74729 [Mu 256911\_at 1.2

alpha-glucan phosphorylase, putative similar to alpha-glucan phosphorylase, L isozyme 1 precursor GB:P04045 from [Solanum tuberosum] ( 256746\_at 1.2

unknown protein similar to CW14 GB:BAA87958 from [Arabidopsis thaliana]; supported by cDNA: gi\_15450961\_gb\_AY054561.1\_ 256747\_at 1.2

unknown protein ; supported by full-length cDNA: Ceres:13928. 256724\_at 1.2

putative protein ;supported by full-length cDNA: Ceres:114734. 256676\_at 1.2

unknown protein 256480\_at 1.2

GTP-binding protein, putative similar to GTP-binding protein NGB [Homo sapiens] GI:4191616 256207\_at 1.2

putative PRP19-like spliceosomal protein WD-40 repeat protein 255830\_at 1.2

hypothetical protein ;supported by full-length cDNA: Ceres:25253. 255586\_at 1.2

putative thioredoxin ; supported by cDNA: gi\_16648848\_gb\_AY058202.1\_ 255279\_at 1.2

UDP-galactose 4-epimerase - like protein UDP-galactose 4-epimerase, Cyamopsis tetragonoloba, AJ005082;supported by full-length cDNA: 254952\_at 1.2

putative protein 24 kDa seed maturation protein - Glycine max,PID:g4102690;supported by full-length cDNA: Ceres:23536. 254920\_at 1.2

hypothetical protein supported by full-length cDNA: Ceres:151415. 254844\_at 1.2

ethylene-regulated transcript 2 (ERT2) 254434\_at 1.2

putative protein various predicted proteins, Arabidopsis thaliana 254179\_at 1.2

putative protein induced upon wounding - Arabidopsis thaliana, PID:e257749;supported by full-length cDNA: Ceres:34176. 254157\_at 1.2

putative protein immunophilin FKBP46 - Spodoptera frugiperda (fall armyworm),PIR2:A55320; supported by cDNA: gi\_15982871\_gb\_AY0571 254076\_at 1.2

putative APG protein proline-rich protein APG - Arabidopsis thaliana, EMBL:X60377;supported by full-length cDNA: Ceres:2574. 253946\_at 1.2

putative protein hypothetical protein - Schizosaccharomyces pombe, PID:e1295810 253803\_at 1.2

pyrophosphate-dependent phosphofructo-1-kinase-like protein pyrophosphate-dependent phosphofructo-1-kinase - Prunus armeniaca (apric 253709\_at 1.2

putative protein RING-finger protein - Lotus japonicus,PIR2:S49446; supported by cDNA: gi\_15983461\_gb\_AF424605.1\_AF424605 253539\_at 1.2

putative protein norbin, Rattus norvegicus, PIR2:JC5812 253456\_at 1.2

putative protein predicted protein, Arabidopsis thaliana, gb:AC002337 253431\_at 1.2

glycine hydroxymethyltransferase (EC 2.1.2.1) - like protein glycine hydroxymethyltransferase, Pisum sativum, PIR2:A42906; supported by cl 253438\_at 1.2

putative protein beta transducin-like protein, Podospora anserina, gb.L28125; supported by cDNA: gi\_11141604\_gb\_AF277458.1\_AF277458 253443\_at 1.2

putative protein peptidyl-prolyl cis-trans isomerase, Schizosaccharomyces pombe, gb:SPBC16H5 253415\_at 1.2

2-dehydro-3-deoxyphosphoheptonate aldolase ;supported by full-length cDNA: Ceres:37432. 253333\_at 1.2

putative protein protein phosphatase Wip1, Homo sapiens, PID:g2218063;supported by full-length cDNA: Ceres:40123. 253323\_at 1.2

Expressed protein ; supported by full-length cDNA: Ceres: 9341. 253292\_at 1.2

putative protein membrane-associated salt-inducible protein, Nicotiana tabacum, PIR:T02047 253209\_at 1.2

WD-40 repeat protein (MSI3) ; supported by cDNA: gi\_2394232\_gb\_AF016848.1\_AF016848 253175\_at 1.2

putative protein various predicted proteins, Arabidopsis thaliana 252903\_at 1.2

putative protein KIAA0274 protein, Homo sapiens, SWISSPROT:Y274\_HUMAN 252737\_at 1.2

dnaJ protein homolog atj3 ;supported by full-length cDNA: Ceres:40976. 252670\_at 1.2

putative protein hypothetical protein At2g28360 - Arabidopsis thaliana, EMBL:AAD20690 252613\_at 1.2

putative RNA-binding protein various putative RNA binding proteins 252453\_at 1.2

putative protein finger protein SIG1, Saccharomyces cerevisiae, PIR2:A56015;supported by full-length cDNA: Ceres:122162. 252371\_at 1.2

aldehyde dehydrogenase (NAD+)-like protein aldehyde dehydrogenase (NAD+) 2A precursor (mitochondrial), Nicotiana tabacum; supported 252372\_at 1.2

hypothetical protein ; supported by cDNA: gi\_13507562\_gb\_AF360347.1\_AF360347 252276\_at 1.2

CASEIN KINASE II, ALPHA CHAIN 2 (CK II) ; supported by cDNA: gi\_391604\_dbj\_D10247.1\_ATHCK2B 252192\_at 1.2

putative protein various predicted proteins, C. elegans, Homo sapiens and yeast;supported by full-length cDNA: Ceres:36721. 252064\_at 1.2

mucin -like protein hemomucin, Drosophila melanogaster, EMBL:DM42014; supported by cDNA: gi\_13430723\_gb\_AF360274.1\_AF360274 252068\_at 1.2

MAP kinase ; supported by cDNA: gi\_14194094\_gb\_AF367253.1\_AF367253 252079\_at 1.2

putative protein various predicted proteins, Arabidopsis thaliana;supported by full-length cDNA: Ceres:4829. 252023\_at 1.2

putative protein KIAA0122 gene , Homo sapiens, EMBL:HSDKG02 251873\_at 1.2

putative protein contains alternative donor splice site TT at exon 2,hypothetical protein C14A4.1 - Caenorhabditis elegans, PIR:T19243; supp 251578\_at 1.2

putative protein crp1 protein, involved in post-transcriptional control of chloroplast gene expression - Zea mays, PIR:T01685 251496\_at 1.2

putative protein CGI-136 protein - Homo sapiens, EMBL:AF151894; supported by cDNA: gi\_14190486\_gb\_AF380643.1\_AF380643 251492\_at 1.2

putative protein RING finger protein AO7, Mus musculus, EMBL:AF171060 251403\_at 1.2

putative protein various predicted proteins, Arabidopsis thaliana 251416\_at 1.2

putative protein CGI-94 protein, Homo sapiens, EMBL:AF151852;supported by full-length cDNA: Ceres:13387. 251371\_at 1.2

auxin response factor-like protein auxin response factor 9 - Arabidopsis thaliana, PIR:T08917; supported by cDNA: gi\_16604602\_gb\_AY059; 251289\_at 1.2

cytochrome p450 (CYP78A9) ;supported by full-length cDNA: Ceres:29661. 251301\_at 1.2

putative zinc-finger protein zinc-finger protein - Schizosaccharomyces pombe, PIR:T41264 251253\_at 1.2

putative protein putative protein F15G16.70 - Arabidopsis thaliana, EMBL:AL132959; supported by cDNA: gi\_15810023\_gb\_AY054280.1\_ 251191\_at 1.2

hypothetical protein RNA polymerase II CTD phosphatase (CTDP1), Homo sapiens, EMBL:AF154115 251134\_at 1.2

F-box protein family, AtFBL3 contains similarity to leucine-rich repeats containing F-box protein FBL3 GI:5919219 from [Homo sapiens] 251104\_at 1.2

putative protein Hsp70 binding protein HspBP1 - Homo sapiens, EMBL:AF093420 251022\_at 1.2

putative protein predicted protein, Arabidopsis thaliana; supported by cDNA: gi\_13430449\_gb\_AF360137.1\_AF360137 251015\_at 1.2

|                                                                                                                                             |             |     |
|---------------------------------------------------------------------------------------------------------------------------------------------|-------------|-----|
| putative protein ; supported by cDNA: gi_14423557_gb_AF387016.1_AF387016                                                                    | 250897_at   | 1.2 |
| myotubularin - like protein myotubularin, Homo sapiens, EMBL:U46024                                                                         | 250833_at   | 1.2 |
| putative protein similar to unknown protein (dbj BAA90353.1)                                                                                | 250830_at   | 1.2 |
| tetrahydrofolylpolyglutamate synthase-like protein                                                                                          | 250757_at   | 1.2 |
| putative protein similar to unknown protein (sp P36540)                                                                                     | 250726_at   | 1.2 |
| putative amidase                                                                                                                            | 250627_at   | 1.2 |
| putative protein condensin subunit SMC4, Drosophila melanogaster, EMBL:AF186472                                                             | 250559_at   | 1.2 |
| RNA binding protein - like rna binding protein, Schizosaccharomyces pombe, PIR:T39586                                                       | 250436_at   | 1.2 |
| putative protein HSPC184, Homo sapiens, EMBL:AF151018; supported by cDNA: gi_14335059_gb_AY037209.1_                                        | 250401_at   | 1.2 |
| putative protein predicted protein, Arabidopsis thaliana                                                                                    | 250355_at   | 1.2 |
| alpha-N-acetylglucosaminidase                                                                                                               | 250245_at   | 1.2 |
| polynucleotide phosphorylase                                                                                                                | 250196_at   | 1.2 |
| low density lipoprotein B-like protein                                                                                                      | 250112_at   | 1.2 |
| transcription factor (gb AAD53095.1) ; supported by cDNA: gi_5823312_gb_AF175990.1_AF175990                                                 | 250103_at   | 1.2 |
| zinc finger protein-like ; supported by full-length cDNA: Ceres: 16392.                                                                     | 249888_s_at | 1.2 |
| squalene monooxygenase                                                                                                                      | 249774_at   | 1.2 |
| nuclear pore protein -like nuclear pore protein gp210 precursor, rat, PIR:S04921                                                            | 249354_at   | 1.2 |
| Expressed protein ; supported by full-length cDNA: Ceres: 121432.                                                                           | 249026_at   | 1.2 |
| unknown protein ;supported by full-length cDNA: Ceres:36901.                                                                                | 248966_at   | 1.2 |
| Expressed protein ; supported by full-length cDNA: Ceres: 13184.                                                                            | 248813_at   | 1.2 |
| VAMP (vesicle-associated membrane protein)-associated protein-like ;supported by full-length cDNA: Ceres:14236.                             | 248796_at   | 1.2 |
| putative protein similar to unknown protein (dbj BAA90625.1)                                                                                | 248805_at   | 1.2 |
| regulator of chromosome condensation (cell cycle regulatory protein) like                                                                   | 248693_at   | 1.2 |
| mitotic checkpoint protein-like                                                                                                             | 248579_at   | 1.2 |
| ubiquitin activating enzyme ;supported by full-length cDNA: Ceres:26820.                                                                    | 248523_s_at | 1.2 |
| arginine-aspartate-rich RNA binding protein-like ; supported by cDNA: gi_1699050_gb_U78867.1_ATU78867                                       | 248403_at   | 1.2 |
| peroxidase                                                                                                                                  | 248382_at   | 1.2 |
| putative protein strong similarity to unknown protein (dbj BAA78737.1);supported by full-length cDNA: Ceres:150246.                         | 248399_at   | 1.2 |
| non phototropic hypocotyl 1-like ; supported by cDNA: gi_5391441_gb_AF053941.2_AF053941                                                     | 247853_at   | 1.2 |
| putative protein B2 protein, Daucus carota, PIR:S32124                                                                                      | 247500_at   | 1.2 |
| auxin response factor - like protein auxin response factor 9, Arabidopsis thaliana, PIR:T08917                                              | 247508_at   | 1.2 |
| putative protein                                                                                                                            | 247422_at   | 1.2 |
| putative protein contains similarity to protein kinase                                                                                      | 247309_at   | 1.2 |
| 2-oxoglutarate/malate translocator ; supported by cDNA: gi_15028072_gb_AY045893.1_                                                          | 247286_at   | 1.2 |
| G protein-coupled receptor-like protein ; supported by cDNA: gi_15451139_gb_AY054650.1_                                                     | 247175_at   | 1.2 |
| amino acid transporter protein-like                                                                                                         | 247120_at   | 1.2 |
| protein kinase, 41K (EC 2.7.1.-) (pir S71172) ; supported by cDNA: gi_166818_gb_L05562.1_ATHPROKINB                                         | 247043_at   | 1.2 |
| MAP protein kinase ; supported by cDNA: gi_13430659_gb_AF360242.1_AF360242                                                                  | 247044_at   | 1.2 |
| putative protein strong similarity to unknown protein (ref NP_005638.1); supported by cDNA: gi_16323187_gb_AY057698.1_                      | 247002_at   | 1.2 |
| putative protein                                                                                                                            | 246846_at   | 1.2 |
| CRS2-like protein CRS2 - Zea mays, EMBL:AF225708                                                                                            | 246492_at   | 1.2 |
| putative protein Tat-SF1 - Homo sapiens, EMBL:U76992                                                                                        | 246499_at   | 1.2 |
| amino acid permease, putative contains Pfam profile: PF00324: Amino acid permease                                                           | 246259_at   | 1.2 |
| amino acid permease, putative contains Pfam profile: PF00324: Amino acid permease                                                           | 246260_at   | 1.2 |
| putative protein predicted proteins - Arabidopsis thaliana                                                                                  | 246110_at   | 1.2 |
| vegetative storage protein Vsp1 ;supported by full-length cDNA: Ceres:32606.                                                                | 245928_s_at | 1.2 |
| putative subunit of TOC complex chloroplast gene Toc64 - Pisum sativum, EMBL:AF179282                                                       | 245879_at   | 1.2 |
| lysophospholipase homolog, putative similar to lysophospholipase homolog GI:2801536 from [Oryza sativa]; supported by cDNA: gi_150282;      | 245734_at   | 1.2 |
| proline-rich protein, putative similar to proline-rich protein GI:3242079 from [Capsicum annuum]; supported by cDNA: gi_14334847_gb_AY03;   | 245749_at   | 1.2 |
| tRNA-glutamine synthetase, putative similar to tRNA-glutamine synthetase GI:2995454 from [Lupinus luteus]                                   | 245631_at   | 1.2 |
| glucosyltransferase like protein                                                                                                            | 245624_at   | 1.2 |
| hypothetical protein                                                                                                                        | 245482_at   | 1.2 |
| LET1 like protein                                                                                                                           | 245496_at   | 1.2 |
| G2484-1 protein                                                                                                                             | 245415_at   | 1.2 |
| unknown protein similar to glycoprotein SP Q16186 G100_HUMAN; supported by cDNA: gi_13926226_gb_AF372873.1_AF372873                         | 245045_at   | 1.2 |
| hypothetical protein                                                                                                                        | 244928_s_at | 1.2 |
| NADH dehydrogenase subunit 4                                                                                                                | 244929_at   | 1.2 |
| putative protein strong similarity to unknown protein (pir T08938)                                                                          | 248226_at   | 1.2 |
| putative protein various predicted proteins, Arabidopsis thaliana                                                                           | 246899_at   | 1.2 |
| hypothetical protein predicted by genemark.hmm; supported by cDNA: gi_13605620_gb_AF361636.1_AF361636                                       | 262965_at   | 1.1 |
| unknown protein                                                                                                                             | 250066_at   | 1.1 |
| unknown protein                                                                                                                             | 267642_at   | 1.1 |
| putative protein kinase contains a protein kinase domain profile (PDOC00100)                                                                | 267550_at   | 1.1 |
| unknown protein                                                                                                                             | 267518_at   | 1.1 |
| unknown protein                                                                                                                             | 267406_at   | 1.1 |
| unknown protein                                                                                                                             | 267373_at   | 1.1 |
| G protein alpha subunit 1 (GPA1) identical to GB:M32887; supported by cDNA: gi_14326501_gb_AF385704.1_AF385704                              | 267375_at   | 1.1 |
| Expressed protein ; supported by full-length cDNA: Ceres: 114879.                                                                           | 267309_at   | 1.1 |
| similar to late embryogenesis abundant proteins ; supported by full-length cDNA: Ceres: 2450.                                               | 267212_at   | 1.1 |
| unknown protein ;supported by full-length cDNA: Ceres:2337.                                                                                 | 267078_at   | 1.1 |
| hypothetical protein predicted by genscan                                                                                                   | 267020_at   | 1.1 |
| hypothetical protein predicted by genscan                                                                                                   | 266903_at   | 1.1 |
| unknown protein                                                                                                                             | 266732_at   | 1.1 |
| putative CCCH-type zinc finger protein ;supported by full-length cDNA: Ceres:101255.                                                        | 266695_at   | 1.1 |
| putative cinnamoyl CoA reductase ;supported by full-length cDNA: Ceres:14133.                                                               | 266578_at   | 1.1 |
| putative preprotein translocase SECY protein Identical to GB:U37247; targeted to the thylakoid membrane; the protein has a chloroplast targ | 266018_at   | 1.1 |
| putative cytochrome P450 identical to GB:D78604; supported by cDNA: gi_15450907_gb_AY054534.1_                                              | 266000_at   | 1.1 |
| putative spliceosome associated protein ;supported by full-length cDNA: Ceres:38968.                                                        | 265930_at   | 1.1 |
| putative nucleosome assembly protein                                                                                                        | 265940_at   | 1.1 |
| hypothetical protein predicted by genefinder                                                                                                | 265885_at   | 1.1 |
| putative acyl-CoA oxidase possibly a peroxisomal component                                                                                  | 265843_at   | 1.1 |
| putative membrane transporter ; supported by cDNA: gi_13605838_gb_AF367318.1_AF367318                                                       | 265741_at   | 1.1 |
| hypothetical protein predicted by genscan                                                                                                   | 265728_at   | 1.1 |

|                                                                                                                                                   |             |     |
|---------------------------------------------------------------------------------------------------------------------------------------------------|-------------|-----|
| Expressed protein ; supported by full-length cDNA: Ceres: 16367.                                                                                  | 265627_at   | 1.1 |
| unknown protein predicted by genefinder                                                                                                           | 265344_at   | 1.1 |
| unknown protein                                                                                                                                   | 265273_at   | 1.1 |
| hypothetical protein predicted by genscan and genefinder                                                                                          | 265276_at   | 1.1 |
| hypothetical protein                                                                                                                              | 265232_s_at | 1.1 |
| unknown protein                                                                                                                                   | 265201_at   | 1.1 |
| integral membrane protein, putative similar to integral membrane protein GI:1209755 from [Beta vulgaris]                                          | 264992_at   | 1.1 |
| U2 snRNP auxiliary factor, large subunit, putative similar to GI:3850823 from (Nicotiana glauca) (J. Biol. Chem. 273 (51), 34603-346              | 264922_s_at | 1.1 |
| Expressed protein ; supported by full-length cDNA: Ceres: 31252.                                                                                  | 264726_at   | 1.1 |
| hypothetical protein similar to hypothetical protein GI:4455225 from [Arabidopsis thaliana]; supported by cDNA: gi_15293160_gb_AY051014.          | 264701_at   | 1.1 |
| unknown protein                                                                                                                                   | 264712_at   | 1.1 |
| hypothetical protein similar to hypothetical protein GB:S51583                                                                                    | 264515_at   | 1.1 |
| unknown protein EST gb N65787 comes from this gene                                                                                                | 264437_at   | 1.1 |
| multi-drug resistance protein Strong similarity to MRP-like ABC transporter gb U92650 from A. thaliana and canalicular multi-drug resistance p    | 264330_at   | 1.1 |
| trehalose-6-phosphate synthase, putative similar to trehalose-6-phosphate synthase GI:297792 from [Kluyveromyces lactis]                          | 264246_at   | 1.1 |
| heme activated protein, putative similar to heme activated protein GI:6289057 from (Arabidopsis thaliana); supported by full-length cDNA: Ce      | 264190_at   | 1.1 |
| unknown protein ; supported by cDNA: gi_15450510_gb_AY052357.1_                                                                                   | 263787_at   | 1.1 |
| hypothetical protein predicted by genscan;supported by full-length cDNA: Ceres:25127.                                                             | 263589_at   | 1.1 |
| ankyrin-like protein                                                                                                                              | 263459_at   | 1.1 |
| putative acetolactate synthase                                                                                                                    | 263460_at   | 1.1 |
| UDP-glucose:indole-3-acetate beta-D-glucosyltransferase, putative similar to UDP-glucose:indole-3-acetate beta-D-glucosyltransferase GI:2'        | 263184_at   | 1.1 |
| hypothetical protein predicted by genemark.hmm; supported by full-length cDNA: Ceres: 148082.                                                     | 263196_at   | 1.1 |
| RSH3 (RelA/SpoT homolog) identical to RSH3 (RelA/SpoT homolog) GI:7141308 from [Arabidopsis thaliana]; supported by cDNA: gi_714130               | 263159_at   | 1.1 |
| glucosyltransferase, putative similar to beta-(1-3)-glucosyl transferase GB:AA62210 GI:3687658 from [Bradyrhizobium japonicum                     | 263031_at   | 1.1 |
| DNA-binding protein similar to cellular nucleic acid binding protein GB:CAA45345 GI:50471 from [Mus musculus]; supported by full-length cDI       | 262948_at   | 1.1 |
| hypothetical protein predicted by genemark.hmm                                                                                                    | 262897_at   | 1.1 |
| hypothetical protein predicted by genemark.hmm                                                                                                    | 262901_at   | 1.1 |
| unknown protein ; supported by cDNA: gi_14596044_gb_AY042810.1_                                                                                   | 262845_at   | 1.1 |
| cysteine proteinase XCP2 identical to papain-type cysteine endopeptidase XCP2 GI:6708183 from [Arabidopsis thaliana]                              | 262796_at   | 1.1 |
| somatic embryogenesis receptor-like kinase, putative similar to somatic embryogenesis receptor-like kinase GI:2224910 from [Daucus carota         | 262563_at   | 1.1 |
| Expressed protein ; supported by full-length cDNA: Ceres: 6612.                                                                                   | 262512_at   | 1.1 |
| unknown protein ; supported by full-length cDNA: Ceres:37444.                                                                                     | 262496_at   | 1.1 |
| hypothetical protein predicted by genscan; supported by cDNA: gi_14334811_gb_AY035079.1_                                                          | 262503_at   | 1.1 |
| unknown protein ;supported by full-length cDNA: Ceres:3024.                                                                                       | 262171_at   | 1.1 |
| unknown protein ;supported by full-length cDNA: Ceres:101924.                                                                                     | 261948_at   | 1.1 |
| hypothetical protein similar to hypothetical protein GB:AAF25977 GI:6714281 from [Arabidopsis thaliana]                                           | 261701_at   | 1.1 |
| 2-isopropylmalate synthase, putative similar to 2-isopropylmalate synthase GB:AF004165 GI:2213881 from [Lycopersicon pennellii]                   | 261668_at   | 1.1 |
| unknown protein contains similarity to actin-related protein GB:BAA74577 GI:4218064 from [Homo sapiens];supported by full-length cDNA: C          | 261672_at   | 1.1 |
| unknown protein contains similarity to formin binding protein GB:AA34811 GI:3550080 from [Homo sapiens]                                           | 261604_at   | 1.1 |
| unknown protein similar to MAP3K-like protein kinase GB:CAB16796 GI:4006878 from [Arabidopsis thaliana];supported by full-length cDNA: (          | 261609_at   | 1.1 |
| fucosyltransferase c3 protein, putative similar to fucosyltransferase c3 protein GB:CAB52254 GI:5702039 from [Vigna radiata]; supported by        | 261612_at   | 1.1 |
| Expressed protein ; supported by full-length cDNA: Ceres: 5811.                                                                                   | 261535_at   | 1.1 |
| ethylene-responsive element binding factor, putative similar to ethylene-responsive element binding factor GI:8809573 from [Nicotiana sylves      | 261470_at   | 1.1 |
| Eukaryotic peptide chain release factor subunit 1 (ERF1) identical to Eukaryotic peptide chain release factor subunit 1 (ERF1) SP:P35614 ((In     | 261204_s_at | 1.1 |
| peroxisomal targeting signal type 2 receptor ; supported by cDNA: gi_15215675_gb_AY050366.1_                                                      | 261207_at   | 1.1 |
| unknown protein                                                                                                                                   | 261179_at   | 1.1 |
| bZIP transcription factor ATB2, putative similar to GB:CAA18838 from [Arabidopsis thaliana]                                                       | 261114_at   | 1.1 |
| transcription factor TINY, putative similar to transcription factor TINY GB:CAA64359 GI:1246403 from [Arabidopsis thaliana];supported by full     | 261059_at   | 1.1 |
| hypothetical protein predicted by genemark.hmm;supported by full-length cDNA: Ceres:34178.                                                        | 261026_at   | 1.1 |
| glyoxalase II, putative similar to GI:1644427 from (Arabidopsis thaliana); supported by cDNA: gi_15450394_gb_AY052298.1_                          | 260986_at   | 1.1 |
| unknown protein similar to Cryptosporidium parvum elongation factor-2 GB:U21667 GI:706974 from [Cryptosporidium parvum]                           | 260786_s_at | 1.1 |
| unknown protein contains similarity to apoptotic cell clearance receptor PtdSerR GI:11037740 from [Mus musculus]                                  | 260798_at   | 1.1 |
| heat shock transcription factor HSF8, putative similar to heat shock transcription factor HSF8 GB:S25481 from (Lycopersicon peruvianum)           | 260701_at   | 1.1 |
| membrane-associated salt-inducible protein isolog                                                                                                 | 260465_at   | 1.1 |
| putative lipase similar to lipase GB:CAA74737 from [Drosophila melanogaster]; supported by cDNA: gi_15293100_gb_AY050984.1_                       | 260393_at   | 1.1 |
| putative protease IV similar to protease IV GB:AAA57008 from [Escherichia coli]; supported by cDNA: gi_6690269_gb_AF114385.1_AF11438              | 260336_at   | 1.1 |
| receptor protein kinase, putative similar to receptor protein kinase GI:1389566 from (Arabidopsis thaliana); supported by cDNA: gi_4204848_       | 260345_at   | 1.1 |
| putative phosphoribosylformylglycinamide synthase similar to GB:K1AA0361 from [Homo sapiens]                                                      | 260250_at   | 1.1 |
| hypothetical protein predicted by genefinder                                                                                                      | 260264_at   | 1.1 |
| putative lipase similar to monoglyceride lipase GB:NP_035974 from [Mus musculus];supported by full-length cDNA: Ceres:36954.                      | 260153_at   | 1.1 |
| unknown protein ; supported by cDNA: gi_15982810_gb_AY057512.1_                                                                                   | 259819_at   | 1.1 |
| hypothetical protein predicted by genscan+; supported by cDNA: gi_15028380_gb_AY045993.1_                                                         | 259754_at   | 1.1 |
| lysophospholipase isolog, putative similar to lysophospholipase isolog GI:1931639 from (Arabidopsis thaliana);supported by full-length cDNA       | 259708_at   | 1.1 |
| DNA-directed RNA polymerase identical to DNA-directed RNA polymerase, mitochondrial precursor GB:P92969 [Arabidopsis thaliana]                    | 259672_at   | 1.1 |
| putative DNA-binding protein predicted by genscan, multiple est matches; Pfam HMM hit: helix-loop-helix DNA-binding domain;supported by           | 259645_at   | 1.1 |
| hypothetical protein                                                                                                                              | 259582_at   | 1.1 |
| hypothetical protein ; supported by cDNA: gi_1518449_gb_U43340.1_ATU43340                                                                         | 259517_at   | 1.1 |
| unknown protein                                                                                                                                   | 259422_at   | 1.1 |
| hypothetical protein contains similarity to 1-phosphatidylinositol-4-phosphate 5-kinase(ATPIP5K1) GI:3702691 from [Arabidopsis thaliana]          | 259426_at   | 1.1 |
| unknown protein                                                                                                                                   | 259356_at   | 1.1 |
| unknown protein ; supported by cDNA: gi_15724287_gb_AF412084.1_AF412084                                                                           | 259240_at   | 1.1 |
| O-acetylserine (thiol) lyase identical to O-acetylserine (thiol) lyase GB:BAA21628 [Arabidopsis thaliana]; supported by cDNA: gi_2281779_dbj      | 259172_at   | 1.1 |
| putative DNA gyrase subunit B similar to putative DNA gyrase subunit GB:O50627 [Bacillus halodurans]                                              | 259138_s_at | 1.1 |
| unknown protein ; supported by cDNA: gi_16226859_gb_AF428353.1_AF428353                                                                           | 258731_at   | 1.1 |
| putative histidyl tRNA synthetase similar to histidyl tRNA synthetase GB:NP_032240 [Mus musculus]                                                 | 258601_at   | 1.1 |
| transfactor, putative similar to transfactor GB:BAA75684 from [Nicotiana tabacum]                                                                 | 258626_at   | 1.1 |
| unknown protein ; supported by cDNA: gi_15450690_gb_AY052713.1_                                                                                   | 258565_at   | 1.1 |
| fatty acid multifunctional protein (ATMFP2) identical to fatty acid multifunctional protein (ATMFP2) GB:AF123254 [Arabidopsis thaliana] (fatty ac | 258555_at   | 1.1 |
| UDP-glucose:sterol glucosyltransferase UDP-glucose:sterol glucosyltransferase GB:Z83833 [Arabidopsis thaliana]; supported by cDNA: gi_15          | 258556_at   | 1.1 |
| putative RNA helicase similar to RNA helicase GB:CAA09200 from [Arabidopsis thaliana]                                                             | 258449_s_at | 1.1 |
| Expressed protein ; supported by full-length cDNA: Ceres: 18951.                                                                                  | 258397_at   | 1.1 |
| putative leucine-rich repeat transmembrane protein kinase similar to leucine-rich repeat transmembrane protein kinase 1 GB:AA27894 from           | 258357_at   | 1.1 |
| unknown protein similar to hypothetical protein GB:CAB36798 from [Arabidopsis thaliana]                                                           | 258361_at   | 1.1 |



DNA-binding protein contains AP2 domain, identical to AP2 domain containing protein RAP2.2 from GB:AAC49768 from [Arabidopsis thaliana]; putative cytochrome P450 similar to GB:Q05047 from [Catharanthus roseus] 258366\_at 1.1

putative hydrolase predicted by genemark.hmm; contains Pfam profile: PF00857 isochorismatase family; supported by full-length cDNA: Ceres: 258113\_at 1.1

calmodulin-binding protein, putative contains Pfam profile: PF00612 IQ calmodulin-binding motif (3 copies) 258052\_at 1.1

hypothetical protein predicted by genemark.hmm 257883\_at 1.1

1,4-alpha-glucan branching enzyme, putative similar to GB:NP\_000149 from [Homo sapiens], contains Pfam profile: PF00128 Alpha amylase 257773\_at 1.1

unknown protein 257667\_at 1.1

lysyl-tRNA synthetase, putative similar to GB:P73443 from [Synechocystis PCC6803], contains Pfam profile: PF00152 tRNA synthetases class 257268\_at 1.1

unknown protein 256927\_at 1.1

O-acetylserine(thiol) lyase, putative similar to O-acetylserine(thiol) lyase GB:CAA71798 from [Brassica juncea] 256930\_at 1.1

hypothetical protein contains similarity to flavanone-3-hydroxylase GB:Q05965 from [Matthiola incana], contains Pfam profile: PF00671 Iron/ 256892\_at 1.1

DEAD box helicase protein, putative similar to DEAD box helicase protein GB:NP\_006764 from [Homo sapiens], contains Pfam profile: PF00 256797\_at 1.1

casein kinase, putative similar to casein kinase 1 GB:NP\_001883 from [Homo sapiens] 256783\_at 1.1

unknown protein 256734\_at 1.1

plastid protein, putative similar to GI:2246378 from [Arabidopsis thaliana] (Proc. Natl. Acad. Sci. U.S.A. 94 (23), 12722-12727 (1997)) 256466\_at 1.1

unknown protein 256271\_at 1.1

MYB-family transcription factor, putative contains Pfam profile: PF00249 Myb-like DNA-binding domain; supported by full-length cDNA: Ceres 256255\_at 1.1

hypothetical protein contains similarity to peptidyl-prolyl cis-trans isomerase E GI:4406227 from [Homo sapiens]; supported by cDNA: gi\_1496 256068\_at 1.1

carbamoylphosphate synthetase, putative similar to carbamoylphosphate synthetase GI:6552726 from [Medicago sativa]; supported by cDNA/ 256002\_at 1.1

putative small nuclear ribonucleoprotein U2B ; supported by full-length cDNA: Ceres:34995. 255871\_at 1.1

putative steroid dehydrogenase ; supported by cDNA: gi\_16226672\_gb\_AF428460.1\_AF428460 255797\_at 1.1

hypothetical protein predicted by genscan+; supported by full-length cDNA: Ceres:111757. 255784\_at 1.1

predicted protein ; supported by full-length cDNA: Ceres: 11106. 255668\_s\_at 1.1

putative glycosylasparaginase 255684\_at 1.1

putative protein similar to nucleolin protein; supported by cDNA: gi\_13605915\_gb\_AF367357.1\_AF367357 255598\_at 1.1

hypothetical protein 255604\_at 1.1

putative GTP pyrophosphokinase similar to bacterial GTP pyrophosphokinases (RelA) similar to B. subtilis RelA (EC 2.7.6.5), GenBank acces: 255522\_at 1.1

tryptophan synthase alpha 1-like protein similar to A. thaliana tryptophan synthase alpha chain (EC 4.2.1.20), GenBank accession number U 255487\_at 1.1

hypothetical protein similar to A. thaliana hypothetical protein F6E13.15, GenBank accession number 3212859 255465\_at 1.1

putative protein phosphatase regulatory subunit 255421\_at 1.1

putative protein hypothetical protein, Arabidopsis thaliana 255224\_at 1.1

hypothetical protein 255026\_at 1.1

lipase-like protein monoglyceride lipase - Mus musculus, PID:e1184892; supported by full-length cDNA: Ceres:6822. 255010\_at 1.1

putative protein Homo sapiens deubiquitinating enzyme UnpEL (UNP),PID:g2656141; supported by cDNA: gi\_15450766\_gb\_AY054463.1\_ 254984\_s\_at 1.1

COP1 like protein photomorphogenesis repressor COP1 - Arabidopsis thaliana, PIR2:T01112 254966\_at 1.1

putative protein 254646\_at 1.1

putative protein 254547\_at 1.1

putative protein hypothetical protein - Caenorhabditis elegans, SPTREMBL:Q17527; supported by cDNA: gi\_14326565\_gb\_AF385737.1\_AF3 254479\_at 1.1

DNA-directed RNA polymerase (EC 2.7.7.6) II second largest chain 254368\_at 1.1

putative protein probable membrane protein YFR005c, Saccharomyces cerevisiae, PIR2:S56260 254353\_s\_at 1.1

nifU-like protein nifU protein homolog YPL135w, Saccharomyces cerevisiae, PIR2:S69049; supported by full-length cDNA: Ceres:8156. 254357\_at 1.1

HSP associated protein like p48, Homo sapiens, PATCHX:G904032; supported by full-length cDNA: Ceres:35786. 254275\_at 1.1

serine/threonine kinase-like protein serine/threonine kinase - Sorghum bicolor, PID:e1184911; supported by cDNA: gi\_14532685\_gb\_AY039 254167\_at 1.1

putative proteasome regulatory subunit KIAA0107 gene, Homo sapiens, D14663; supported by full-length cDNA: Ceres:38927. 254086\_at 1.1

protein-methionine-S-oxide reductase ; supported by full-length cDNA: Ceres:36536. 254099\_at 1.1

putative phosphatidylserine decarboxylase phosphatidylserine decarboxylase (EC 4.1.1.65) 2 - yeast, Pir2:S64484 254035\_at 1.1

putative aconitase Pumpkin mRNA for aconitase, Cucurbita sp., PID:g868003; supported by cDNA: gi\_15215803\_gb\_AY050431.1\_ 253954\_at 1.1

UDP rhamnose--anthocyanidin-3-glucoside rhamnosyltransferase - like protein UDP rhamnose--anthocyanidin-3-glucoside rhamnosyltransferase 253879\_s\_at 1.1

putative protein hypothetical chloroplast protein RF19, Guillardia theta, PIR2:S73274; supported by full-length cDNA: Ceres:32397. 253857\_at 1.1

putative protein predicted proteins, Arabidopsis thaliana; supported by full-length cDNA: Ceres:19314. 253789\_at 1.1

early auxin-inducible protein 11 (IAA11) ; supported by cDNA: gi\_972924\_gb\_U18413.1\_ATU18413 253791\_at 1.1

hypothetical protein ; supported by full-length cDNA: Ceres:249331. 253751\_at 1.1

putative protein ; supported by full-length cDNA: Ceres:12759. 253752\_at 1.1

putative protein ; supported by full-length cDNA: Ceres:142647. 253687\_at 1.1

putative protein ; supported by full-length cDNA: Ceres:32848. 253640\_at 1.1

hypothetical protein ; supported by cDNA: gi\_14335143\_gb\_AY037251.1\_ 253596\_s\_at 1.1

hypothetical protein ; supported by full-length cDNA: Ceres:151518. 253520\_at 1.1

putative protein crp1 protein, Zea mays, Z14393 253495\_at 1.1

putative protein mixed-lineage protein kinase, Homo sapiens, PIR:A53800 253473\_at 1.1

putative protein 253343\_at 1.1

putative protein hemolysin, 38K, Synechocystis sp., Pir2:S75595 253351\_at 1.1

putative protein 253143\_at 1.1

DNA-directed RNA polymerase (EC 2.7.7.6) II largest chain 253133\_at 1.1

putative protein zinc finger protein, Arabidopsis thaliana, gb:L76926 253105\_at 1.1

Expressed protein ; supported by full-length cDNA: Ceres: 147351. 252946\_at 1.1

putative protein several hypothetical proteins - Arabidopsis thaliana 252475\_s\_at 1.1

putative protein proline transport helper PTH1 - Candida albicans, EMBL:Y18210 252426\_at 1.1

putative peptide transporter peptide transporter (ptr1), Hordeum vulgare, AF023472; supported by cDNA: gi\_13877878\_gb\_AF370202.1\_AF 252377\_at 1.1

putative protein KIAA0226 gene product - Homo sapiens, PID:d1013904; supported by cDNA: gi\_14532611\_gb\_AY039930.1\_ 252353\_at 1.1

putative protein 252344\_s\_at 1.1

RNA-directed RNA polymerase RNA-directed RNA polymerase 252261\_at 1.1

putative protein hypothetical protein - Schizosaccharomyces pombe, EMBL:CAB11710.1 252264\_at 1.1

NAC2-like protein NAC2 - Arabidopsis thaliana, EMBL:AF201456; supported by cDNA: gi\_16604578\_gb\_AY059734.1\_ 252278\_at 1.1

crooked neck-like protein crooked neck protein (CRN) - Drosophila melanogaster, SWISSPROT:CRN\_DROME; supported by cDNA: gi\_152 252100\_at 1.1

hypothetical protein 252086\_at 1.1

monodehydroascorbate reductase (NADH) - like protein monodehydroascorbate reductase (NADH), Lycopersicon esculentum, PIR:T06407;su 252024\_at 1.1

RNA helicase-like protein RNA helicase, Mus musculus, PIR:I49731; supported by cDNA: gi\_15982880\_gb\_AY057548.1\_ 251989\_at 1.1

putative protein peroxisomal Ca-dependent solute carrier - Oryctolagus cuniculus, EMBL:AF004161 251915\_at 1.1

putative protein 251917\_at 1.1

putative protein MULTICOPY SUPPRESSOR OF RAS1 - Schizosaccharomyces pombe, EMBL:D78582; supported by full-length cDNA: Cere 251657\_at 1.1

zinc finger-like protein several zinc finger proteins - Arabidopsis thaliana 251586\_at 1.1

putative protein paladin - Mus musculus, EMBL:MMPAL 251296\_at 1.1

putative protein phosphoprotein phosphatase (EC 3.1.3.16) 1A-alpha - Homo sapiens, PIR:S22423; supported by full-length cDNA: Ceres:200 251259\_at 1.1

|                                                                                                                                          |             |     |
|------------------------------------------------------------------------------------------------------------------------------------------|-------------|-----|
| hypothetical protein ; supported by cDNA: gi_15292666_gb_AY050767.1_                                                                     | 251083_at   | 1.1 |
| putative protein KIAA1303 protein - Homo sapiens, EMBL:AB037724                                                                          | 251056_at   | 1.1 |
| cytochrom P450 - like protein cytochrome P450 77A3p, Glycine max., PIR:T05948;supported by full-length cDNA: Ceres:7867.                 | 250859_at   | 1.1 |
| ubiquitin activating enzyme 2 (UBA2) identical to gi:1703477                                                                             | 250729_at   | 1.1 |
| transcription factor HBP-1b (gb)AAD24395.1)                                                                                              | 250655_at   | 1.1 |
| DR1-like protein TATA-binding protein-associated phosphoprotein Dr1 - Arabidopsis thaliana, EMBL:D38110supported by full-length cDNA: (  | 250543_at   | 1.1 |
| dihydropyrimidinase ; supported by cDNA: gi_13878036_gb_AF370281.1_AF370281                                                              | 250318_at   | 1.1 |
| putative protein mRNA, Moritella marina, EMBL:AB025342                                                                                   | 250276_at   | 1.1 |
| putative protein ;supported by full-length cDNA: Ceres:37090.                                                                            | 250290_at   | 1.1 |
| putative protein apospory-associated protein C, Chlamydomonas reinhardtii, EMBL:AF195243;supported by full-length cDNA: Ceres:93845.     | 250186_at   | 1.1 |
| putative protein COP9 complex subunit 3, Mus musculus, EMBL:AF071313;supported by full-length cDNA: Ceres:121028.                        | 250188_at   | 1.1 |
| putative protein mRNA (orf04), Arabidopsis thaliana, EMBL:ATORF04                                                                        | 250045_at   | 1.1 |
| disease resistance protein - like downy mildew resistance protein RPP5, Arabidopsis thaliana, EMBL:AF180942                              | 250064_at   | 1.1 |
| putative protein similar to unknown protein (pir T09939);supported by full-length cDNA: Ceres:23754.                                     | 250013_at   | 1.1 |
| casein kinase-like protein                                                                                                               | 250021_at   | 1.1 |
| eukaryotic cap-binding protein (gb)AAC17220.1) ; supported by cDNA: gi_3108208_gb_AF028809.1_AF028809                                    | 250033_at   | 1.1 |
| putative protein similar to unknown protein (gb AAD20392.1)                                                                              | 249825_at   | 1.1 |
| MTN3-like protein ; supported by cDNA: gi_3747110_gb_AF095641.1_AF095641                                                                 | 249800_at   | 1.1 |
| putative protein contains similarity to integral membrane protein                                                                        | 249759_at   | 1.1 |
| NADH dehydrogenase (ubiquinone) (EC 1.6.5.3) 76K chain precursor - like protein NADH dehydrogenase (ubiquinone) (EC 1.6.5.3) 76K cha     | 249627_at   | 1.1 |
| unknown protein                                                                                                                          | 249315_at   | 1.1 |
| unknown protein                                                                                                                          | 249273_at   | 1.1 |
| putative protein contains similarity to glutathione-S-transferase/glutaredoxin;supported by full-length cDNA: Ceres:4645.                | 249233_at   | 1.1 |
| putative protein similar to unknown protein (pir T26506); supported by cDNA: gi_16649056_gb_AY059898.1_                                  | 249165_at   | 1.1 |
| putative protein contains similarity to unknown protein (pir T00959); supported by cDNA: gi_15450893_gb_AY054527.1_                      | 249079_at   | 1.1 |
| DNA-directed RNA polymerase subunit                                                                                                      | 248984_at   | 1.1 |
| putative protein contains similarity to maturase-related protein                                                                         | 248815_at   | 1.1 |
| unknown protein                                                                                                                          | 248786_at   | 1.1 |
| unknown protein ;supported by full-length cDNA: Ceres:31667.                                                                             | 248710_at   | 1.1 |
| putative protein contains similarity to peptidase                                                                                        | 248426_at   | 1.1 |
| selenium-binding protein-like                                                                                                            | 248315_at   | 1.1 |
| developmental protein SINA (seven in absentia)                                                                                           | 248256_at   | 1.1 |
| unknown protein                                                                                                                          | 248243_at   | 1.1 |
| E2, ubiquitin-conjugating enzyme, putative ;supported by full-length cDNA: Ceres:10022.                                                  | 247999_at   | 1.1 |
| WD-repeat protein-like ;supported by full-length cDNA: Ceres:109499.                                                                     | 248000_at   | 1.1 |
| peroxisomal targeting signal type 1 receptor                                                                                             | 248010_at   | 1.1 |
| putative protein fibrinogen-binding protein, Staphylococcus aureus, PIR:S41539                                                           | 247849_at   | 1.1 |
| protein kinase 6 - like protein kinase 6, Glycine max, PIR:S29851; supported by cDNA: gi_17063197_gb_AY062096.1_                         | 247750_at   | 1.1 |
| Expressed protein ; supported by full-length cDNA: Ceres: 11699.                                                                         | 247657_at   | 1.1 |
| unknown protein ; supported by cDNA: gi_15809801_gb_AY054168.1_                                                                          | 247446_at   | 1.1 |
| unknown protein ; supported by full-length cDNA: Ceres: 11054.                                                                           | 247355_at   | 1.1 |
| putative protein strong similarity to unknown protein (emb CAB89363.1)                                                                   | 247265_at   | 1.1 |
| histone acetyltransferase                                                                                                                | 247238_at   | 1.1 |
| unknown protein                                                                                                                          | 247241_at   | 1.1 |
| putative protein contains similarity to RING3 protein                                                                                    | 247147_at   | 1.1 |
| dimethyladenosine transferase-like protein                                                                                               | 247089_at   | 1.1 |
| SKP1 interacting partner 2 (SKIP2) identical to SKP1 interacting partner 2 GI:10716949 from [Arabidopsis thaliana]                       | 247033_at   | 1.1 |
| casein kinase II alpha subunit ; supported by cDNA: gi_391602_dbj_D10246.1_ATHCK2A                                                       | 247000_at   | 1.1 |
| putative protein UBIQUINONE BIOSYNTHESIS PROTEIN AARF - Providencia stuartii, EMBL:AF002165                                              | 246973_at   | 1.1 |
| serine-rich protein ;supported by full-length cDNA: Ceres:99323.                                                                         | 246917_at   | 1.1 |
| cytochrome P450 GA3 ; supported by cDNA: gi_3342248_gb_AF047719.1_AF047719                                                               | 246864_at   | 1.1 |
| chaperonin gamma chain - like protein chaperonin containing TCP-1 complex gamma chain, African clawed frog, PIR:S54210; supported by     | 246830_at   | 1.1 |
| long-chain-fatty-acid--CoA ligase-like protein long-chain-fatty-acid--CoA ligase - Brassica napus, EMBL:Z72152                           | 246789_at   | 1.1 |
| putative protein ;supported by full-length cDNA: Ceres:232091.                                                                           | 246645_at   | 1.1 |
| epsilon-adaptin, putative similar to epsilon-adaptin GI:5689377 from [Homo sapiens]                                                      | 246634_at   | 1.1 |
| putative protein HR21spA protein involved in DNA double-strand break repair - Mus musculus, EMBL:X98293                                  | 246500_at   | 1.1 |
| TOM (target of myb1) -like protein TOM1, Mus musculus, EMBL:MUS6972;supported by full-length cDNA: Ceres:1330.                           | 246421_at   | 1.1 |
| Cu2+-transporting ATPase-like protein                                                                                                    | 246276_at   | 1.1 |
| putative protein                                                                                                                         | 246234_at   | 1.1 |
| putative protein predicted proteins, Arabidopsis thaliana and others                                                                     | 246180_at   | 1.1 |
| RAN1 small Ras-like GTP-binding nuclear protein (Ran-1) ;supported by full-length cDNA: Ceres:9480.                                      | 246153_s_at | 1.1 |
| putative protein predicted proteins - Arabidopsis thaliana                                                                               | 246112_at   | 1.1 |
| protein phosphatase 2A regulatory subunit B-like protein protein phosphatase 2A 62 kDa B regulatory subunit, Arabidopsis thaliana, TREME | 246050_s_at | 1.1 |
| Pspzf zinc finger protein - like DNA binding zinc finger protein (Pspzf), Pisum sativum, EMBL:AB018422                                   | 246012_at   | 1.1 |
| putative protein ;supported by full-length cDNA: Ceres:120101.                                                                           | 245948_at   | 1.1 |
| predicted protein                                                                                                                        | 245913_at   | 1.1 |
| putative protein                                                                                                                         | 245881_at   | 1.1 |
| putative protein DNA-binding protein - Triticum aestivum, EMBL:AF091837;supported by full-length cDNA: Ceres:249741.                     | 245888_at   | 1.1 |
| SIR2-family protein sirtuin type 4 (SIRT4) - Homo sapiens, EMBL:AF083109; supported by cDNA: gi_15028032_gb_AY045873.1_                  | 245895_at   | 1.1 |
| GTL1 - like protein GTL1, Arabidopsis thaliana, EMBL:ATAJ3215; supported by cDNA: gi_14423451_gb_AF386963.1_AF386963                     | 245861_at   | 1.1 |
| hypothetical protein contains similarity to cockayne syndrome complementation group A protein GB:U28413 GI:975301 from [Homo sapiens]    | 245764_s_at | 1.1 |
| prolin-rich protein, putative similar to prolin-rich protein GI:21045 from [Phaseolus vulgaris]                                          | 245688_at   | 1.1 |
| hypothetical protein predicted by genemark.hmm; supported by cDNA: gi_16648668_gb_AY058110.1_                                            | 245629_at   | 1.1 |
| SYBL1 like protein                                                                                                                       | 245513_at   | 1.1 |
| DEF (CLA1) protein ; supported by cDNA: gi_14334451_gb_AY034917.1_                                                                       | 245281_at   | 1.1 |
| hypothetical protein ; supported by cDNA: gi_16226250_gb_AF428283.1_AF428283                                                             | 245269_at   | 1.1 |
| unknown protein                                                                                                                          | 257477_at   | 1.1 |
| RIBOSOMAL PROTEIN, putative similar to 30S RIBOSOMAL PROTEIN S1 GB:P46228 from [Synechococcus sp.]                                       | 261507_at   | 1.1 |
| FKBP-type peptidyl-prolyl cis-trans isomerases, putative contains Pfam profile: PF00254 FKBP-type peptidyl-prolyl cis-trans isomerases   | 258175_at   | 1.1 |
| FKBP-type peptidyl-prolyl cis-trans isomerase, putative contains Pfam profile: PF00254 FKBP-type peptidyl-prolyl cis-trans isomerases    | 256230_at   | 1.1 |
| putative protein various predicted proteins, Arabidopsis thaliana                                                                        | 250194_at   | 1.1 |
| putative protein predicted proteins, Arabidopsis thaliana, D.melanogaster, C.elegans and S.pombe                                         | 246714_at   | 1.1 |
| unknown protein                                                                                                                          | 259207_at   | 1   |

|                                                                                                                                             |             |   |
|---------------------------------------------------------------------------------------------------------------------------------------------|-------------|---|
| MYB - like protein cM4 myb transcription factor, Arabidopsis thaliana, gb:S58280; supported by cDNA: gi_14423389_gb_AF386932.1_AF386        | 255250_at   | 1 |
| putative protein merozoite surface antigen 2, Plasmodium falciparum, PIR:A45637                                                             | 252112_at   | 1 |
| 1-D-deoxyxylulose 5-phosphate synthase - like protein 1-D-deoxyxylulose 5-phosphate synthase, Lycopersicon esculentum, EMBL:AF14381         | 250362_at   | 1 |
| unknown protein                                                                                                                             | 248005_at   | 1 |
| hypothetical protein predicted by genscan; similar to GPI2623296 AC002409                                                                   | 267608_at   | 1 |
| putative CCH-type zinc finger protein also an ankyrin-repeat protein; supported by cDNA: gi_14335105_gb_AY037232.1_                         | 267534_at   | 1 |
| 26S proteasome regulatory subunit                                                                                                           | 267543_at   | 1 |
| putative cytochrome P450                                                                                                                    | 267500_s_at | 1 |
| unknown protein ; supported by full-length cDNA: Ceres:36855.                                                                               | 267503_at   | 1 |
| putative lipase ; supported by full-length cDNA: Ceres:207043.                                                                              | 267496_at   | 1 |
| hypothetical protein predicted by genefinder and genscan                                                                                    | 267473_at   | 1 |
| Expressed protein ; supported by full-length cDNA: Ceres:269036.                                                                            | 267462_at   | 1 |
| hypothetical protein                                                                                                                        | 267378_at   | 1 |
| hypothetical protein predicted by grail and genscan                                                                                         | 267396_at   | 1 |
| putative alcohol dehydrogenase                                                                                                              | 267168_at   | 1 |
| hypothetical protein predicted by genscan                                                                                                   | 266901_at   | 1 |
| putative protein kinase contains a protein kinase domain profile (PDOC00100)                                                                | 266911_at   | 1 |
| unknown protein                                                                                                                             | 266871_at   | 1 |
| FtsH protease, putative contains similarity to YME1 GI:295582, a member of the ftsH-SEC18-PAS1-CDC48 family of putative ATPase-encod        | 266842_at   | 1 |
| hypothetical protein predicted by genefinder and genscan; supported by cDNA: gi_14532607_gb_AY039928.1_                                     | 266734_at   | 1 |
| unknown protein ; supported by cDNA: gi_16604341_gb_AY058069.1_                                                                             | 266557_at   | 1 |
| hypothetical protein predicted by genscan and genefinder                                                                                    | 266574_at   | 1 |
| unknown protein ; supported by cDNA: gi_16612316_gb_AF439849.1_AF439849                                                                     | 266480_at   | 1 |
| putative carboxyphosphoenolpyruvate mutase                                                                                                  | 266438_at   | 1 |
| putative proline-rich protein                                                                                                               | 266283_at   | 1 |
| putative RNA-binding protein ; supported by cDNA: gi_16226862_gb_AF428354.1_AF428354                                                        | 266240_at   | 1 |
| unknown protein ; supported by cDNA: gi_13358176_gb_AF324984.2_AF324984                                                                     | 266207_at   | 1 |
| putative C2H2-type zinc finger protein                                                                                                      | 266110_at   | 1 |
| putative alpha-carboxyltransferase ; supported by cDNA: gi_6851090_gb_AF056969.1_AF056969                                                   | 266099_at   | 1 |
| unknown protein                                                                                                                             | 266005_at   | 1 |
| unknown protein ; supported by full-length cDNA: Ceres:9001.                                                                                | 265961_at   | 1 |
| unknown protein                                                                                                                             | 265974_at   | 1 |
| recA, putative similar to GB:CAA39098 GI:48781 recA from [Legionella pneumophila]                                                           | 265941_s_at | 1 |
| putative WD-40 repeat protein, MS14 almost identical to GB:2599091; contains a Trp-Asp (WD-40) repeat signature; supported by cDNA: gi_     | 265946_s_at | 1 |
| unknown protein ; supported by full-length cDNA: Ceres:104853.                                                                              | 265867_at   | 1 |
| unknown protein                                                                                                                             | 265793_at   | 1 |
| hypothetical protein predicted by genscan                                                                                                   | 265697_at   | 1 |
| putative C2H2-type zinc finger protein likely a nucleic acid binding protein; supported by cDNA: gi_4585204_gb_AF095588.1_AF095588          | 265662_at   | 1 |
| putative nitrilase ; supported by full-length cDNA: Ceres:20875.                                                                            | 265642_at   | 1 |
| 50S ribosomal protein L4 ; supported by full-length cDNA: Ceres:156843.                                                                     | 265594_at   | 1 |
| putative D-amino acid dehydrogenase                                                                                                         | 265318_at   | 1 |
| hypothetical protein predicted by genscan; supported by full-length cDNA: Ceres:13277.                                                      | 265285_at   | 1 |
| hypothetical protein predicted by genscan                                                                                                   | 265141_at   | 1 |
| hypothetical protein predicted by genscan                                                                                                   | 265092_at   | 1 |
| hypothetical protein predicted by genemark.hmm                                                                                              | 264935_at   | 1 |
| putative glycosylation enzyme ; supported by cDNA: gi_15292806_gb_AY050837.1_                                                               | 264844_at   | 1 |
| hypothetical protein predicted by genscan+                                                                                                  | 264750_at   | 1 |
| putative glutamyl-tRNA reductase 2 precursor similar to GB:P49294 and to A. thaliana HEMA2 (gb U27118)                                      | 264660_at   | 1 |
| putative U2 small nuclear ribonucleoprotein A (U2 SNRNP-A) Identical to A. thaliana U2 SnRNP-specific A protein (gb X69137). ESTs gb AT     | 264678_at   | 1 |
| unknown protein ; supported by cDNA: gi_13430645_gb_AF360235.1_AF360235                                                                     | 264615_at   | 1 |
| hypothetical protein predicted by genemark.hmm                                                                                              | 264539_at   | 1 |
| hypothetical protein predicted by genscan+                                                                                                  | 264491_at   | 1 |
| Expressed protein ; supported by full-length cDNA: Ceres:39286.                                                                             | 264443_at   | 1 |
| spermidine synthase, putative similar to spermidine synthase GI:4138109 from [Lycopersicon esculentum]; supported by cDNA: gi_1403063f      | 264317_at   | 1 |
| hypothetical protein predicted by genemark.hmm; supported by cDNA: gi_15081627_gb_AY048206.1_                                               | 264098_at   | 1 |
| unknown protein                                                                                                                             | 264011_at   | 1 |
| putative ABC transporter related to multi drug resistance proteins and P-glycoproteins                                                      | 263904_at   | 1 |
| hypothetical protein predicted by genscan                                                                                                   | 263899_at   | 1 |
| putative RNA polymerase sigma-70 factor ; supported by cDNA: gi_7209639_dbj_AB029916.1_AB029916                                             | 263846_at   | 1 |
| putative ubiquitin fusion-degradation protein ; supported by full-length cDNA: Ceres:34470.                                                 | 263756_at   | 1 |
| putative NADPH dependent mannose 6-phosphate reductase ; supported by full-length cDNA: Ceres:21730.                                        | 263758_s_at | 1 |
| hypothetical protein predicted by genscan and genefinder; supported by cDNA: gi_14596224_gb_AY042900.1_                                     | 263556_at   | 1 |
| F-box protein ORE9, AtFBL7 identical to F-box containing protein ORE9 GI:15420162 from [Arabidopsis thaliana]                               | 263490_at   | 1 |
| putative importin (nuclear transport factor ) protein                                                                                       | 263448_at   | 1 |
| putative prohibitin ; supported by full-length cDNA: Ceres:6176.                                                                            | 263375_s_at | 1 |
| putative RNA-binding protein ; supported by full-length cDNA: Ceres:4595.                                                                   | 263355_at   | 1 |
| Expressed protein ; supported by full-length cDNA: Ceres:264189.                                                                            | 263209_at   | 1 |
| unknown protein ; supported by full-length cDNA: Ceres:21223.                                                                               | 263110_at   | 1 |
| unknown protein ; supported by cDNA: gi_16930680_gb_AF436824.1_AF436824                                                                     | 263050_at   | 1 |
| similar to glucose inhibited division protein A from prokaryotes                                                                            | 263053_at   | 1 |
| unknown protein                                                                                                                             | 263023_at   | 1 |
| T76725 come from this gene.                                                                                                                 | 263010_at   | 1 |
| unknown protein ; supported by full-length cDNA: Ceres:9435.                                                                                | 262947_at   | 1 |
| hypothetical protein predicted by genemark.hmm                                                                                              | 262941_at   | 1 |
| hypothetical protein contains similarity to 30S ribosomal protein S5 GI:6969105 from [Campylobacter jejuni]; supported by cDNA: gi_1433489  | 262880_at   | 1 |
| unknown protein ; supported by cDNA: gi_15028136_gb_AY046018.1_                                                                             | 262881_at   | 1 |
| cytochrome B561, putative similar to cytochrome GB:AAD11424 GI:4206110 [Mesembryanthemum crystallinum]                                      | 262831_at   | 1 |
| unknown protein EST gb N37870 comes from this gene                                                                                          | 262794_at   | 1 |
| mercaptopyruvate sulfurtransferase (Mst2/Rdh2) identical to mercaptopyruvate sulfurtransferase GI:6009983 and thiosulfate sulfurtransferase | 262712_at   | 1 |
| flavin-containing amine oxidase contains Pfam profile: PF01593 Flavin containing amine oxidase                                              | 262668_at   | 1 |
| hypothetical protein                                                                                                                        | 262621_at   | 1 |
| hypothetical protein predicted by genemark.hmm                                                                                              | 262562_at   | 1 |
| putative ubiquitin-conjugating enzyme First 212 a.a. are 41% identical to Ubiquitin-Conjugating Enzyme E2 [Saccharomyces cerevisiae] (gij48 | 262537_s_at | 1 |

|                                                                                                                                                            |             |   |
|------------------------------------------------------------------------------------------------------------------------------------------------------------|-------------|---|
| putative translation initiation factor IF2 Except for first 311 amino acids, 41% identical to translation initiation factor IF2 [Bacillus subtilis] (gij12 | 262483_at   | 1 |
| putative protein disulfide isomerase precursor Similar to gb Z11499 protein disulfide isomerase from Medicago sativa. ESTs gb AI099693, gb                 | 262504_at   | 1 |
| unknown protein Similar to gb X84260 POS5 gene product from Saccharomyces cerevisiae. EST gb W43879 comes from this gene; supporte                         | 262506_at   | 1 |
| hypothetical protein similar to hypothetical protein GB:AAD49998 GI:5734733 from [Arabidopsis thaliana]                                                    | 262478_at   | 1 |
| unknown protein ;supported by full-length cDNA: Ceres:150507.                                                                                              | 262071_at   | 1 |
| SAR DNA binding protein, putative similar to SAR DNA binding protein GB:BAA31260 GI:3288883 from [Oryza sativa];supported by full-leng                     | 262094_at   | 1 |
| hypothetical protein identical to hypothetical protein GB:AAD55482 (Arabidopsis thaliana)                                                                  | 262052_at   | 1 |
| protein kinase, putative similar to mitogen activated protein kinase kinase GB:AAC32599 GI:3450842 from [Oryza sativa]                                     | 261974_at   | 1 |
| hypothetical protein predicted by genemark.hmm;supported by full-length cDNA: Ceres:206286.                                                                | 261921_at   | 1 |
| hypothetical protein predicted by genemark.hmm;supported by full-length cDNA: Ceres:108306.                                                                | 261823_at   | 1 |
| BTG1 binding factor 1, putative similar to BTG1 binding factor 1 GI:6016012 from [Homo sapiens]                                                            | 261841_at   | 1 |
| unknown protein                                                                                                                                            | 261774_at   | 1 |
| hypothetical protein similar to hypothetical protein GB:AAF22892 GI:6664310 from [Arabidopsis thaliana]; supported by cDNA: gi_15294161_                   | 261720_at   | 1 |
| hypothetical protein similar to hypothetical protein GB:AAF25987 GI:6714291 from [Arabidopsis thaliana]                                                    | 261663_at   | 1 |
| unknown protein similar to putative lipase GB:AAF36744 GI:7109480 from [Arabidopsis thaliana]                                                              | 261667_at   | 1 |
| DNA-binding protein PcMYB1, putative similar to DNA-binding protein PcMYB1 GB:U67133 GI:2224898 from [Petroselinum crispum];support                        | 261637_at   | 1 |
| hypothetical protein similar to guanine nucleotide exchange factor-like protein GB:CAB82690 GI:7329696 from [Arabidopsis thaliana]                         | 261621_at   | 1 |
| protein kinase, putative contains Pfam profile: PF00069 Eukaryotic protein kinase domain                                                                   | 261547_at   | 1 |
| receptor protein kinase, putative contains Pfam profiles: PF00069 Eukaryotic protein kinase domain, PF00560 Leucine Rich Repeat                            | 261552_at   | 1 |
| peroxidase ATP4a identical to GB:CAA67309 GI:1429213 from [Arabidopsis thaliana]; supported by full-length cDNA: Ceres: 39968.                             | 261518_at   | 1 |
| unknown protein ;supported by full-length cDNA: Ceres:920.                                                                                                 | 261377_at   | 1 |
| unknown protein ;supported by full-length cDNA: Ceres:23407.                                                                                               | 261403_at   | 1 |
| putative NPK1-related protein kinase 2 predicted by genemark.hmm                                                                                           | 261312_at   | 1 |
| hypothetical protein predicted by genscan+                                                                                                                 | 261277_at   | 1 |
| calreticulin, putative similar to GB:AAF06346 from [Vitis vinifera]                                                                                        | 261248_at   | 1 |
| NAM protein, putative similar to NAM protein GI:6066594 from [Petunia hybrida]; supported by cDNA: gi_14334571_gb_AY034959.1_                              | 261192_at   | 1 |
| unknown protein                                                                                                                                            | 261112_at   | 1 |
| sec14 cytosolic factor, putative similar to SP:P24859 from [Kluyveromyces lactis]                                                                          | 261116_at   | 1 |
| oligouridylylase binding protein, putative similar to GB:CAB75429 from (Nicotiana plumbaginifolia) (EMBO J. 19, 1638-1649 (2000));supported                | 261040_at   | 1 |
| hypothetical protein predicted by genemark.hmm; supported by cDNA: gi_13430817_gb_AF360321.1_AF360321                                                      | 260927_at   | 1 |
| glycine-rich RNA-binding protein grp1a, putative similar to glycine-rich RNA-binding protein grp1a GB:L31374 GI:496232 from [Sinapis alba]                 | 260923_at   | 1 |
| unknown protein                                                                                                                                            | 260817_at   | 1 |
| putative U1 small nuclear ribonucleoprotein 70 kDa                                                                                                         | 260533_at   | 1 |
| putative salt-inducible protein                                                                                                                            | 260523_at   | 1 |
| unknown protein ; supported by full-length cDNA: Ceres: 2381.                                                                                              | 260442_at   | 1 |
| putative RNA-binding domain contains Pfam profile: PF00806 Pumilio-family RNA binding domains (aka PUM-HD, Pumilio homology domain                         | 260398_at   | 1 |
| putative heme oxygenase similar to heme oxygenase GB:AAD22107 [Arabidopsis thaliana];supported by full-length cDNA: Ceres:101223.                          | 260396_at   | 1 |
| putative serine/threonine kinase similar to serine/threonine kinase GB:AAB68776 [Arabidopsis thaliana]; supported by cDNA: gi_2352083_gb                   | 260339_at   | 1 |
| putative aminopeptidase similar to aminopeptidase N (alpha-aminoacylpeptide hydrolase) GB:P04825 [Escherichia coli]; contains Pfam profile                 | 260295_at   | 1 |
| putative protein kinase Pfam HMM hit: Eukaryotic protein kinase domain; C-term region is similar to C-term region of chicken protein kinase P              | 260191_at   | 1 |
| unknown protein ;supported by full-length cDNA: Ceres:108165.                                                                                              | 260099_at   | 1 |
| unknown protein similar to putative protein GB:CAB38899 [Arabidopsis thaliana]                                                                             | 260055_at   | 1 |
| endoplasmic reticulum alpha-mannosidase, putative similar to GI:5579331 from [Homo sapiens]; supported by cDNA: gi_15450803_gb_AY01                        | 260029_at   | 1 |
| cell division control protein, putative similar to SP:P40986 from [Saccharomyces cerevisiae]                                                               | 259960_at   | 1 |
| unknown protein                                                                                                                                            | 259943_at   | 1 |
| unknown protein similar to LIGATIN GB:Q61211 from (Mus musculus), contains PAS domain Sensory-box                                                          | 259948_at   | 1 |
| putative phenylalanyl-tRNA synthetase beta-subunit; PheHB similar to phenylalanyl-tRNA synthetase beta-subunit (PheHB) GB:5032011 [Hoi                     | 259920_at   | 1 |
| unknown protein                                                                                                                                            | 259812_at   | 1 |
| RNA-binding protein MEI2, putative similar to GI:6650523 from [Arabidopsis thaliana]                                                                       | 259769_at   | 1 |
| hypothetical protein predicted by genscan+, similar to aminomethyltransferase GB:CAA20175 from [Streptomyces coelicolor A3(2)]                             | 259715_at   | 1 |
| putative cleavage and polyadenylation specificity factor similar to cleavage and polyadenylation specificity factor 73 kDa subunit GB:AAF0022              | 259717_at   | 1 |
| hypothetical protein contains similarity to myosin heavy chain cardiac muscle specific isoform 1 GI:7416982 from (Argopecten irradians); sup               | 259659_at   | 1 |
| hypothetical protein                                                                                                                                       | 259532_at   | 1 |
| unknown protein                                                                                                                                            | 259470_at   | 1 |
| unknown protein similar to putative dehydrogenase GI:1922246 from [Arabidopsis thaliana]; supported by cDNA: gi_15408534_dbj_AB03206i                      | 259438_at   | 1 |
| hypothetical protein predicted by genemark.hmm                                                                                                             | 259397_at   | 1 |
| unknown protein similar to hect domain and RLD 2 GB:NP_004658 [Homo sapiens]                                                                               | 259334_at   | 1 |
| putative adenylylsulfate kinase similar to GB:S47640 [Arabidopsis thaliana]                                                                                | 259339_at   | 1 |
| putative SAR DNA-binding protein-1 similar to GB:AAC16330 from [Pisum sativum]; supported by cDNA: gi_11878186_gb_AF302491.1_AF3                           | 259311_at   | 1 |
| putative glycogen synthase similar to glycogen synthase precursor (Granule-Bound Starch Synthase II) GB:Q43093 from [Pisum sativum]; su                    | 259277_at   | 1 |
| unknown protein                                                                                                                                            | 259292_at   | 1 |
| unknown protein similar to zinc finger protein GB:BAA33206 [Oryza sativa]                                                                                  | 259244_at   | 1 |
| unknown protein predicted by genefinder, multiple est matches                                                                                              | 259245_at   | 1 |
| hypothetical protein predicted by genscan                                                                                                                  | 259246_s_at | 1 |
| unknown protein similar to putative phytochelatin synthetase GB:CAA07251 [Arabidopsis thaliana], Pfam HMM hit: TNFR/NGFR cysteine-rich                     | 259122_at   | 1 |
| putative zeta-carotene desaturase precursor nearly identical to zeta-carotene desaturase precursor GB:AAA91161 [Arabidopsis thaliana];sup                  | 259092_at   | 1 |
| hypothetical protein similar to hypothetical protein GB:AAB72157 [Arabidopsis thaliana];supported by full-length cDNA: Ceres:1132.                         | 259012_at   | 1 |
| putative DnaJ protein Pfam HMM hit: DnaJ, prokaryotic heat shock protein                                                                                   | 258909_at   | 1 |
| hypothetical protein similar to hypothetical protein GB:AAC17075 [Arabidopsis thaliana]; supported by cDNA: gi_15810358_gb_AY056218.1_                     | 258804_at   | 1 |
| putative alpha-L-arabinofuranosidase contains similarity to alpha-L-arabinofuranosidase A precursor GB:P42254 [Aspergillus niger]; supporte                | 258774_at   | 1 |
| hypothetical protein similar to hypothetical protein GB:AAF23212 GI:6671952 from (Arabidopsis thaliana)                                                    | 258756_at   | 1 |
| IAA-amino acid hydrolase (ILR1) identical to IAA-amino acid hydrolase (ILR1) GB:U23794 [Arabidopsis thaliana];supported by full-length cDN                 | 258610_at   | 1 |
| Rab escort protein, putative similar to choroideremia-like Rab escort protein GB:2NP_001812 from [Homo sapiens]                                            | 258536_at   | 1 |
| hypothetical protein predicted by genemark.hmm; supported by cDNA: gi_14334461_gb_AY034922.1_                                                              | 258522_at   | 1 |
| 14-3-3 protein GF14nu (grf7) identical to 14-3-3 protein GF14 nu GI:1531631 from [Arabidopsis thaliana];supported by full-length cDNA: Cere                | 258489_at   | 1 |
| cell division protein FtsH-like protein similar to cell division protein FtsH GB:AAD35665 from [Thermotoga maritima];supported by full-length cl           | 258494_at   | 1 |
| alternative oxidase 1a precursor identical to GB:Q39219 from [Arabidopsis thaliana];supported by full-length cDNA: Ceres:116257.                           | 258452_at   | 1 |
| ubiquitin-specific protease 25 (UBP25) similar to GI:11993490; supported by cDNA: gi_11993489_gb_AF302673.1_AF302673                                       | 258372_at   | 1 |
| hypothetical protein predicted by genemark.hmm                                                                                                             | 258255_at   | 1 |
| unknown protein contains Pfam profile: PF00076 RNA recognition motif                                                                                       | 258229_at   | 1 |
| putative pectinesterase similar to pectinesterase precursor GB:Q43043 [Petunia integrifolia]; contains Pfam profile: PF01095 pectinesterase;s              | 258193_at   | 1 |
| hypothetical protein predicted by genemark.hmm; supported by cDNA: gi_15028198_gb_AY045922.1_                                                              | 258206_at   | 1 |
| dehydrogenase, putative similar to dihydropyrimidine dehydrogenase GB:BAA89789 from [Homo sapiens]; supported by cDNA: gi_14334711                         | 258162_at   | 1 |

Expressed protein ; supported by full-length cDNA: Ceres: 26411. 258092\_at 1

unknown protein ;supported by full-length cDNA: Ceres:141813. 258078\_at 1

unknown protein similar to MRP-like ABC transporter GB:AA49791 from [Arabidopsis thaliana] 258033\_at 1

Expressed protein ; supported by full-length cDNA: Ceres: 12996. 258041\_at 1

hypothetical protein predicted by genemark.hmm 258051\_at 1

putative cell differentiation protein similar to cell differentiation protein, Rcd1p GB:CAB16251 from [Schizosaccharomyces pombe];supported 257984\_at 1

hypothetical protein contains Pfam profiles: PF00415 regulator of chromosome condensation (RCC1), PF01363 FYVE zinc finger 257921\_at 1

E2, ubiquitin-conjugating enzyme, putative similar to ubiquitin conjugating enzyme GB:CAA51706 [Saccharomyces cerevisiae] (Nature 365 (1 257893\_at 1

unknown protein contains Pfam profile:PF01435 Peptidase family M48;supported by full-length cDNA: Ceres:156849. 257791\_at 1

hypothetical protein contains Pfam profile:PF00534 Glycosyl transferases group 1 257797\_at 1

nucleolar protein, putative nucleolar protein GB:NP\_006383 from [Homo sapiens], (Mol. Cell. Biol. 17 (12), 7088-7098 (1997)) 257694\_at 1

CTP-synthetase, putative similar to CTP synthetase GB:U49350 GI:1515356 (Mus musculus) 257702\_at 1

unknown protein contains Pfam profile: PF00400 2 WD domains, G-beta repeats 257684\_s\_at 1

Expressed protein ; supported by full-length cDNA: Ceres: 32454. 257659\_at 1

cytochrome P450 monooxygenase (CYP71B4) identical to cytochrome P450 monooxygenase (CYP71B4) GB:D78603 [Arabidopsis thaliana] 257635\_at 1

unknown protein ; supported by cDNA: gi\_15294249\_gb\_AF410316.1\_AF410316 257253\_at 1

hypothetical protein contains Pfam profile: PF01535 domain of unknown function 257188\_at 1

unknown protein 257019\_at 1

protein kinase, putative contains similarity to serine/threonine-protein kinase homolog GB:Q61136 from [Mus musculus], contains Pfam profil 256995\_at 1

subtilisin-like serine protease, putative contains similarity to cucumisin-like serine protease GI:3176874 from [Arabidopsis thaliana] 256997\_at 1

unknown protein 256928\_at 1

hypothetical protein contains similarity to transporter proteins 256697\_at 1

unknown protein 256422\_at 1

hypothetical protein 256387\_at 1

unknown protein 256173\_at 1

hypothetical protein contains similarity to nuclear DNA helicase II GI:577738 from [Bos taurus] 256140\_at 1

ethylene-responsive RNA helicase, putative similar to ethylene-responsive RNA helicase GI:5669638 from [Lycopersicon esculentum] 256152\_at 1

guanine nucleotide regulatory protein, putative similar to guanine nucleotide regulatory protein GI:3461880 from [Mus musculus] 256119\_at 1

MAP kinase, putative similar to MAP3K delta-1 protein kinase GI:2253010 from [Arabidopsis thaliana] 256121\_at 1

calcium dependent protein kinase, putative similar to calcium dependent protein kinase GI:587499 from [Oryza sativa] 255936\_at 1

hypothetical protein predicted by genemark.hmm; supported by cDNA: gi\_13877978\_gb\_AF370252.1\_AF370252 255939\_at 1

putative protein 255639\_at 1

putative acetyltransferase similar to Digitalis lanata lanatoside 15 -O-acetyltransferase, GenBank accession number AJ011567 255607\_at 1

putative SecA-type chloroplast protein transport factor non-consensus GA donor splice site at exon 4 255540\_at 1

coded for by A. thaliana cDNA T46835 similar to several small proteins (~100 aa) that are induced by heat, auxin, ethylene and wounding su 255479\_at 1

putative chloroplast outer envelope 86-like protein similar to P. sativum outer envelope 86 protein OEP86, GenBank accession number Z315: 255482\_at 1

hypothetical protein similar to A. thaliana hypothetical protein F15K9.11, GenBank accession number AC005278 255452\_at 1

hypothetical protein ;supported by full-length cDNA: Ceres:6957. 255456\_at 1

hypothetical protein 255348\_at 1

hypothetical protein 255062\_at 1

Arabidopsis thaliana flavin-type blue-light photoreceptor (SW:Q43125) (Pfam: PF00875, Score=765.2, E=2.6e-226, N=1) ; supported by cDN 255068\_at 1

AX110P -like protein AX110P -Daucus carota,PID:g285739;supported by full-length cDNA: Ceres:19582. 255047\_at 1

putative protein beta-transducin repeats containing protein - Homo sapiens,PID:e1284220 254913\_at 1

Expressed protein ; supported by full-length cDNA: Ceres: 24475. 254846\_at 1

hypothetical protein 254779\_at 1

DnaJ-like protein DnaJ-like protein, Phaseolus vulgaris, U77935; supported by cDNA: gi\_6691126\_gb\_AF214107.1\_AF214107 254688\_at 1

N-acetylmethionine deacetylase-like protein, fragment N-acetylmethionine deacetylase (AOdD) - Dictyostelium discoideum, PID:G763048 254690\_at 1

putative protein W15DMY32F, W25DMY32F 254657\_s\_at 1

hypothetical protein ; supported by full-length cDNA: Ceres: 14794. 254626\_at 1

hypothetical protein ;supported by full-length cDNA: Ceres:40232. 254503\_at 1

putative protein transcription initiation factor IID beta chain, fruit fly, Pir2:B49453; supported by cDNA: gi\_15293300\_gb\_AY051084.1\_ 254463\_at 1

putative protein CRP1, Zea mays, PID:g3289002 254483\_at 1

putative protein predicted protein, Caenorhabditis elegans, PIR2:S44608; supported by cDNA: gi\_13241745\_gb\_AF327068.1\_AF327068 254449\_at 1

phosphatase like protein phosphoprotein phosphatase (EC 3.1.3.16) PPT - rat 254211\_at 1

hypothetical protein 254178\_at 1

putative protein ; supported by cDNA: gi\_15810434\_gb\_AY056256.1\_ 254169\_at 1

CER2 ;supported by full-length cDNA: Ceres:33382. 254122\_at 1

proton pump interactor non-consensus GA donor splice site at exon 5 253868\_at 1

pelota (PEL1) 253882\_at 1

putative protein WREBP-1, Nicotiana tabacum, EMBL:AB017693 253784\_at 1

26S proteasome subunit 4-like protein Drosophila melanogaster 26S proteasome subunit 4 ATPase, PID:g1066065; supported by cDNA: gi\_ 253755\_at 1

gamma-glutamyltransferase-like protein gamma-glutamyltransferase - Arabidopsis thaliana,PIR2:S58286 253708\_at 1

putative protein 253577\_at 1

ubiquitin-specific protease 24 (UBP24), putative similar to GI:11993488; ubiquitin carboxyl-terminal hydrolase, Mus musculus, PID:D101289; 253552\_at 1

kinase binding protein - like Skb1 protein homolog, Homo sapiens, PIR2:T03842 253558\_at 1

predicted protein DAN26, Homo sapiens, PID:E285308 253565\_at 1

putative protein microtubule-associated protein 1B (MAP1B), Homo sapiens, L06237 253497\_at 1

putative protein RNA-binding protein LAH1, Saccharomyces cerevisiae,PIR2:B48600; supported by cDNA: gi\_15810396\_gb\_AY056237.1\_ 253396\_at 1

gamma-VPE (vacuolar processing enzyme) ; supported by cDNA: gi\_13877794\_gb\_AF370160.1\_AF370160 253358\_at 1

putative protein Caenorhabditis elegans cosmid, gene T16G1.11,PID:e1349366; supported by cDNA: gi\_14335023\_gb\_AY037191.1\_ 253336\_at 1

putative protein aminotransferase (AspC family), Aquifex aeolicus, PIR2:D70479; supported by cDNA: gi\_15912290\_gb\_AY056423.1\_ 253308\_at 1

putative protein protein kinase APK1, Arabidopsis thaliana, PIR2:S28615; supported by cDNA: gi\_16612248\_gb\_AF439824.1\_AF439824 253184\_at 1

putative protein probable membrane protein YBL019w, yeast, PIR2:S45753 253126\_at 1

heat shock protein 70 like protein dnaK-type molecular chaperone PHSP1 -Pisum sativum,PID:g20835 253013\_at 1

putative protein 253022\_at 1

putative protein ubiquitin fusion degradation protein - Schizosaccharomyces pombe, PID:e1132723 252947\_at 1

isovaleryl-CoA-dehydrogenase precursor (IVD) ;supported by full-length cDNA: Ceres:33674. 252570\_at 1

glucosyltransferase-like protein UDP-glucose glucosyltransferase - Arabidopsis thaliana, EMBL:AB016819;supported by full-length cDNA: Ce 252482\_at 1

FtsH protease, putative contains similarity to FtsH protease GI:13183728 from [Medicago sativa] 252449\_at 1

putative protein PrMC3 - Pinus radiata,PID:g4154352 252315\_at 1

putative protein N7 protein - Medicago truncatula, EMBL:CAA76808;supported by full-length cDNA: Ceres:99337. 252336\_at 1

putative progesterone-binding protein homolog Atpm2 ; supported by cDNA: gi\_4960153\_gb\_AF153283.1\_AF153283 252338\_at 1

putative protein 252141\_at 1

|                                                                                                                                            |             |   |
|--------------------------------------------------------------------------------------------------------------------------------------------|-------------|---|
| putative protein predicted protein, Arabidopsis thaliana                                                                                   | 252113_at   | 1 |
| putative protein predicted protein, Oryza sativa, EMBL:AP000367;supported by full-length cDNA: Ceres:1514.                                 | 252093_at   | 1 |
| putative protein 150-kD protein cluA - Dictyostelium discoideum,PID:g2281117                                                               | 252031_at   | 1 |
| transporter-like protein oligopeptide transporter (LeOPT1) - Lycopersicon esculentum, EMBL:AF016713                                        | 251916_at   | 1 |
| protein kinase -like protein protein kinase APK1, Arabidopsis thaliana, PIR:S28615;supported by full-length cDNA: Ceres:150889.            | 251922_at   | 1 |
| hypothetical protein ;supported by full-length cDNA: Ceres:101230.                                                                         | 251925_at   | 1 |
| Expressed protein ; supported by full-length cDNA: Ceres: 120919.                                                                          | 251845_at   | 1 |
| Ca-dependent solute carrier - like protein peroxisomal Ca-dependent solute carrier, Oryctolagus cuniculus, EMBL:AF004161;supported by fu   | 251757_at   | 1 |
| putative protein predicted protein, Arabidopsis thaliana; supported by cDNA: gi_14596046_gb_AY042811.1_                                    | 251741_at   | 1 |
| PROBABLE EUKARYOTIC TRANSLATION INITIATION FACTOR 3 SUBUNIT 8 ; supported by cDNA: gi_2789659_gb_AF040102.1_AF040                          | 251738_at   | 1 |
| putative protein several hypothetical proteins - different plant species; supported by cDNA: gi_16604698_gb_AY059794.1_                    | 251713_at   | 1 |
| translation initiation factor 3 -like protein mammary tumor-associated protein INT6 - Homo sapiens, EMBL:U94174; supported by cDNA: gi_1   | 251628_at   | 1 |
| putative protein predicted protein, Arabidopsis thaliana;supported by full-length cDNA: Ceres:114412.                                      | 251554_at   | 1 |
| putative protein putative proteins - Arabidopsis thaliana; supported by cDNA: gi_16604381_gb_AY058089.1_                                   | 251467_at   | 1 |
| protein synthesis initiation factor - like eukaryotic protein synthesis initiation factor, Homo sapiens, EMBL:AF104913                     | 251431_at   | 1 |
| dihydrodipicolinate synthase precursor ;supported by full-length cDNA: Ceres:37907.                                                        | 251392_at   | 1 |
| tubulin gamma-1 chain                                                                                                                      | 251331_s_at | 1 |
| putative protein DNAJ PROTEIN - Synechococcus PCC7942, EMBL:D29968; supported by cDNA: gi_16648711_gb_AY058132.1_                          | 251263_at   | 1 |
| mRNA capping enzyme - like protein mRNA capping enzyme (HCE), Homo sapiens, EMBL:AF025654                                                  | 251136_at   | 1 |
| putative protein unknown protein A12g37660 - Arabidopsis thaliana, EMBL:AC004684; supported by cDNA: gi_15294289_gb_AF410336.1_A           | 251038_at   | 1 |
| putative protein In2, Zea mays, EMBL:X58573;supported by full-length cDNA: Ceres:13224.                                                    | 250967_at   | 1 |
| putative protein                                                                                                                           | 250928_at   | 1 |
| putative protein predicted proteins, Arabidopsis thaliana; supported by cDNA: gi_15215621_gb_AY050339.1_                                   | 250883_at   | 1 |
| I-box binding factor - like protein I-box binding factor (LeMYBI gene), Lycopersicon esculentum, EMBL:LES243339;supported by full-length c | 250858_at   | 1 |
| putative protein predicted proteins, Arabidopsis thaliana;supported by full-length cDNA: Ceres:34592.                                      | 250861_at   | 1 |
| ATPH1-like protein ;supported by full-length cDNA: Ceres:109246.                                                                           | 250748_at   | 1 |
| eukaryotic translation initiation factor 3 subunit-like protein                                                                            | 250758_at   | 1 |
| transcription factor HBP-1b homolog (sp)P43273) ; supported by cDNA: gi_217826_dbj_D10042.1_ATHAHBP1B                                      | 250671_at   | 1 |
| putative protein SF16 protein, pollen specific - Helianthus annuus, PIR:T13992                                                             | 250613_at   | 1 |
| splicing factor-like protein ; supported by cDNA: gi_15451045_gb_AY054603.1_                                                               | 250457_at   | 1 |
| bromodomain protein - like bromodomain protein (BRDT), Homo sapiens, EMBL:AF019085                                                         | 250424_at   | 1 |
| beta-adaptin-like protein A ; supported by cDNA: gi_7385050_gb_AF216385.1_AF216385                                                         | 250352_at   | 1 |
| putative protein putative secreted protein SCF41.30c, Streptomyces coelicolor, EMBL:SCF41_30                                               | 250268_s_at | 1 |
| putative protein GCN4-complementing protein, Arabidopsis thaliana, EMBL:AJ130878                                                           | 250285_at   | 1 |
| unknown protein                                                                                                                            | 250238_at   | 1 |
| putative protein                                                                                                                           | 250179_at   | 1 |
| protein kinase MSK-3 - like protein kinase MSK-3, A.medicago, PIR:S37642                                                                   | 250141_at   | 1 |
| unknown protein ; supported by cDNA: gi_14423559_gb_AF387017.1_AF387017                                                                    | 250131_at   | 1 |
| putative protein                                                                                                                           | 250092_at   | 1 |
| UDP-glucose pyrophosphorylase ; supported by cDNA: gi_13430663_gb_AF360244.1_AF360244                                                      | 250074_at   | 1 |
| putative protein non-consensus GC donor splice site at exon 1, unknown (C40) protein, Homo sapiens, EMBL:AF103798                          | 250042_at   | 1 |
| triacylglycerol lipase-like protein triacylglycerol lipase (EC 3.1.1.1.3) precursor 1 - Rhizomucor miehei, PIR:A34959                      | 249999_at   | 1 |
| putative protein similar to unknown protein (dbj)BAA91724.1)                                                                               | 249844_at   | 1 |
| putative protein contains similarity to remorin;supported by full-length cDNA: Ceres:28686.                                                | 249797_at   | 1 |
| putative protein crp1, Zea mays, PIR:T01685                                                                                                | 249464_at   | 1 |
| unknown protein ; supported by cDNA: gi_15081800_gb_AY048293.1_                                                                            | 249308_at   | 1 |
| putative protein similar to unknown protein (emb)CAB66408.1);supported by full-length cDNA: Ceres:106836.                                  | 249231_at   | 1 |
| U2 snRNP auxiliary factor, small subunit ; supported by cDNA: gi_15723292_gb_AF409140.1_AF409140                                           | 249164_at   | 1 |
| putative protein contains similarity to RNA-binding protein; supported by cDNA: gi_15215747_gb_AY050403.1_                                 | 248905_at   | 1 |
| casein kinase II beta chain ; supported by cDNA: gi_468263_gb_L22563.1_ATHCKIB                                                             | 248826_at   | 1 |
| eukaryotic release factor 1 homolog (gb)AAA91169.1) ; supported by cDNA: gi_15215862_gb_AY050462.1_                                        | 248749_at   | 1 |
| putative protein strong similarity to unknown protein (emb)CAB71043.1); supported by cDNA: gi_15810326_gb_AY056202.1_                      | 248721_at   | 1 |
| putative protein similar to unknown protein (gb)AAF31026.1)                                                                                | 248648_at   | 1 |
| unknown protein ;supported by full-length cDNA: Ceres:147765.                                                                              | 248592_at   | 1 |
| putative protein contains similarity to unknown protein (dbj)BAA90946.1)                                                                   | 248601_at   | 1 |
| putative protein strong similarity to unknown protein (gb)AAD25781.1)                                                                      | 248497_at   | 1 |
| putative protein similar to unknown protein (pir)T31651);supported by full-length cDNA: Ceres:32353.                                       | 248492_at   | 1 |
| putative protein contains similarity to iron-containing superoxide dismutase;supported by full-length cDNA: Ceres:126592.                  | 248493_at   | 1 |
| arginine/serine-rich splicing factor RSP41 homolog ; supported by cDNA: gi_13877816_gb_AF370171.1_AF370171                                 | 248369_at   | 1 |
| RNA-binding protein-like                                                                                                                   | 248294_at   | 1 |
| ATP-dependent Clp protease ATP-binding subunit ClpX1 identical to CLP protease regulatory subunit CLPX GI:2674203 from [Arabidopsis th     | 248255_at   | 1 |
| putative protein contains similarity to unknown protein (gb)AAC64884.1)                                                                    | 248124_at   | 1 |
| chaperone GrpE-like protein ;supported by full-length cDNA: Ceres:20790.                                                                   | 248101_at   | 1 |
| putative protein contains similarity to cytochrome oxidase assembly factor                                                                 | 248049_at   | 1 |
| putative protein contains similarity to phosphatidylinositol/phosphatidylcholine transfer protein                                          | 247995_at   | 1 |
| putative protein similar to unknown protein (gb)AAD55473.1);supported by full-length cDNA: Ceres:7233.                                     | 247931_at   | 1 |
| putative protein similar to unknown protein (ref)NP_004732.1);supported by full-length cDNA: Ceres:11265.                                  | 247942_at   | 1 |
| protein carboxyl methylase-like                                                                                                            | 247926_at   | 1 |
| putative protein similar to unknown protein (emb)CAB79781.1);supported by full-length cDNA: Ceres:31005.                                   | 247835_at   | 1 |
| ABC transporter-like protein ; supported by cDNA: gi_9964120_gb_AF287699.1_AF287699                                                        | 247806_at   | 1 |
| NADP-dependent malate dehydrogenase ;supported by full-length cDNA: Ceres:25200.                                                           | 247813_at   | 1 |
| light harvesting pigment - like protein LEDI-3 protein, Lithospermum erythrorhizon, EMBL:D45900                                            | 247783_at   | 1 |
| cyclophilin ROC7 ; supported by full-length cDNA: Ceres:25325.                                                                             | 247791_at   | 1 |
| RNA helicase - like protein RNA helicase, Homo sapiens, EMBL:Z70200                                                                        | 247564_at   | 1 |
| putative protein predicted protein, Arabidopsis thaliana; supported by cDNA: gi_14517559_gb_AY039615.1_                                    | 247574_at   | 1 |
| putative protein many predicted proteins from Arabidopsis thaliana;supported by full-length cDNA: Ceres:38421.                             | 247550_at   | 1 |
| putative protein rhoGAP, Homo sapiens, EMBL:Z23024; supported by full-length cDNA: Ceres: 152557.                                          | 247545_at   | 1 |
| putative protein various predicted proteins, Arabidopsis thaliana;supported by full-length cDNA: Ceres:14414.                              | 247461_at   | 1 |
| MYB96 transcription factor-like protein ; supported by cDNA: gi_5823334_gb_AF176001.1_AF176001                                             | 247455_at   | 1 |
| putative protein similar to unknown protein (pir)S76033)                                                                                   | 247390_at   | 1 |
| putative protein contains similarity to FtsH                                                                                               | 247235_at   | 1 |
| putative protein similar to unknown protein (dbj) BAA75199.1)                                                                              | 247187_at   | 1 |
| oligopeptidase A ; supported by cDNA: gi_15028226_gb_AY045936.1_                                                                           | 247152_at   | 1 |

|                                                                                                                                                                                            |             |     |
|--------------------------------------------------------------------------------------------------------------------------------------------------------------------------------------------|-------------|-----|
| putative protein similar to unknown protein (sp P55606); supported by cDNA: gi_14190422_gb_AF378889.1_AF378889                                                                             | 247077_at   | 1   |
| eukaryotic translation initiation factor - like protein eukaryotic translation initiation factor 3, Nicotiana tabacum, EMBL:Y11996; supported by cDNA: gi_14190422_gb_AF378889.1_AF378889  | 246865_s_at | 1   |
| voltage-dependent anion-selective channel protein hsr2 ;supported by full-length cDNA: Ceres:1417.                                                                                         | 246546_at   | 1   |
| Exportin1 (XPO1) protein ; supported by cDNA: gi_15810122_gb_AY056126.1_                                                                                                                   | 246424_at   | 1   |
| hypothetical protein ; supported by full-length cDNA: Ceres: 8960.                                                                                                                         | 246291_at   | 1   |
| putative protein sequence in GenBank Accession Number AC002330                                                                                                                             | 246298_at   | 1   |
| Expressed protein ; supported by full-length cDNA: Ceres: 37542.                                                                                                                           | 246193_at   | 1   |
| putative protein                                                                                                                                                                           | 246111_at   | 1   |
| putative protein predicted proteins, Homo sapiens                                                                                                                                          | 246066_at   | 1   |
| putative protein FH protein interacting protein FIP1, Arabidopsis thaliana, EMBL:AF174428;supported by full-length cDNA: Ceres:19508.                                                      | 246034_at   | 1   |
| putative protein HERC2 - Homo sapiens, EMBL:AF071172                                                                                                                                       | 245851_at   | 1   |
| hypothetical protein contains similarity to maleless protein (mle) GI:157905 from [Drosophila melanogaster]                                                                                | 245863_s_at | 1   |
| hypothetical protein                                                                                                                                                                       | 245868_at   | 1   |
| receptor serine/threonine kinase PR5K, putative similar to receptor serine/threonine kinase PR5K GI:1235680 from [Arabidopsis thaliana]                                                    | 245750_s_at | 1   |
| Expressed protein ; supported by cDNA: gi_13877886_gb_AF370206.1_AF370206                                                                                                                  | 245261_at   | 1   |
| putative dihydrodipicolinate synthase ;supported by full-length cDNA: Ceres:26817.                                                                                                         | 245145_at   | 1   |
| putative beta-1,3-glucanase ;supported by full-length cDNA: Ceres:95083.                                                                                                                   | 245039_at   | 1   |
| hypothetical protein                                                                                                                                                                       | 257319_at   | 1   |
| hypothetical protein                                                                                                                                                                       | 257336_at   | 1   |
| hypothetical protein similar to polyketide hydroxylases from several bacterial species                                                                                                     | 257410_at   | 1   |
| unknown protein                                                                                                                                                                            | 257519_at   | 1   |
| unknown protein                                                                                                                                                                            | 256505_at   | 1   |
| hypothetical protein predicted by genscan                                                                                                                                                  | 264047_at   | 0.9 |
| RNA-directed RNA polymerase, putative similar to RNA-directed RNA polymerase GB:CAA09697 GI:4138282 [Nicotiana tabacum]                                                                    | 262888_at   | 0.9 |
| unknown protein                                                                                                                                                                            | 260620_at   | 0.9 |
| putative long-chain acyl-CoA synthetase similar to malonyl CoA synthetase GB:AAF28840 from [Bradyrhizobium japonicum];supported by full-length cDNA: gi_13877886_gb_AF370206.1_AF370206    | 258312_at   | 0.9 |
| hypothetical protein predicted by genemark.hmm; supported by full-length cDNA: Ceres: 33269.                                                                                               | 257601_at   | 0.9 |
| putative protein vsf-1 protein, Lycopersicon esculentum, PIR2:S52203; supported by cDNA: gi_15100048_gb_AF401297.1_AF401297                                                                | 252969_at   | 0.9 |
| phosphatidylinositol-4-phosphate 5-kinase-like protein phosphatidylinositol-4-phosphate 5-kinase AtPIP5K1 - Arabidopsis thaliana, EMBL:AB010000                                            | 251711_at   | 0.9 |
| Arabidopsis thaliana /REF=U37281.1 /DEF=actin-2 mRNA, complete cds /LEN=1637 (_5,_M,_3 represent transcript regions 5 prime, MiddleX-Actin) /                                              | 267640_at   | 0.9 |
| photomorphogenesis repressor (COP1) identical to GB:L24437; supported by cDNA: gi_402684_gb_L24437.1_ATHCOP1A                                                                              | 267640_at   | 0.9 |
| unknown protein similar to hypothetical protein PIR S76698 S76698; supported by cDNA: gi_15809963_gb_AY054250.1_                                                                           | 267562_at   | 0.9 |
| unknown protein ; supported by cDNA: gi_13430537_gb_AF360181.1_AF360181                                                                                                                    | 267513_at   | 0.9 |
| putative tyrosyl-tRNA synthetase                                                                                                                                                           | 267446_s_at | 0.9 |
| putative U5 small nuclear ribonucleoprotein, an RNA helicase                                                                                                                               | 267454_at   | 0.9 |
| putative related to microbial divalent cation tolerance proteins ; supported by cDNA: gi_12963360_gb_AF327524.1_AF327524                                                                   | 267405_at   | 0.9 |
| putative translation initiation factor eIF-2B epsilon subunit                                                                                                                              | 267415_at   | 0.9 |
| diacylglycerol O-acyltransferase ; supported by cDNA: gi_15450799_gb_AY054480.1_                                                                                                           | 267280_at   | 0.9 |
| putative WRKY-type DNA binding protein ; supported by cDNA: gi_15027912_gb_AY045813.1_                                                                                                     | 267246_at   | 0.9 |
| putative serine carboxypeptidase I ;supported by full-length cDNA: Ceres:33165.                                                                                                            | 267256_s_at | 0.9 |
| Expressed protein ; supported by full-length cDNA: Ceres: 24003.                                                                                                                           | 267211_at   | 0.9 |
| unknown protein ; supported by cDNA: gi_14194142_gb_AF367277.1_AF367277                                                                                                                    | 267214_at   | 0.9 |
| putative spliceosome associated protein ; supported by cDNA: gi_15450714_gb_AY052725.1_                                                                                                    | 267062_at   | 0.9 |
| unknown protein                                                                                                                                                                            | 267052_at   | 0.9 |
| unknown protein                                                                                                                                                                            | 267015_at   | 0.9 |
| putative dolichyl-phosphate beta-glucosyltransferase ; supported by cDNA: gi_15810210_gb_AY056120.1_                                                                                       | 266986_at   | 0.9 |
| putative katanin ;supported by full-length cDNA: Ceres:119620.                                                                                                                             | 266905_at   | 0.9 |
| unknown protein ;supported by full-length cDNA: Ceres:9000.                                                                                                                                | 266924_at   | 0.9 |
| putative poly(A) polymerase ; supported by cDNA: gi_14532699_gb_AY039974.1_                                                                                                                | 266659_at   | 0.9 |
| unknown protein                                                                                                                                                                            | 266620_at   | 0.9 |
| unknown protein                                                                                                                                                                            | 266621_at   | 0.9 |
| eukaryotic translation initiation factor 3 delta subunit ; supported by cDNA: gi_1036802_gb_U36765.1_ATU36765                                                                              | 266554_s_at | 0.9 |
| putative GTP-binding protein                                                                                                                                                               | 266471_at   | 0.9 |
| putative ligand-gated ion channel subunit ; supported by cDNA: gi_5759099_gb_AF170494.1_AF170494                                                                                           | 266337_at   | 0.9 |
| chloroplast membrane protein (ALBINO3) identical to GB:U89272;supported by full-length cDNA: Ceres:31457.                                                                                  | 266224_at   | 0.9 |
| unknown protein                                                                                                                                                                            | 266192_at   | 0.9 |
| cytochrome p450, putative similar to cytochrome p450 GI:438242 from [Solanum melongena]; supported by cDNA: gi_14334809_gb_AY0351                                                          | 266155_at   | 0.9 |
| putative vacuolar protein sorting-associated protein ; supported by cDNA: gi_15081710_gb_AY048248.1_                                                                                       | 266096_at   | 0.9 |
| putative NADP-dependent glyceraldehyde-3-phosphate dehydrogenase ; supported by cDNA: gi_14335051_gb_AY037205.1_                                                                           | 265998_at   | 0.9 |
| unknown protein ;supported by full-length cDNA: Ceres:98881.                                                                                                                               | 265959_at   | 0.9 |
| unknown protein ;supported by full-length cDNA: Ceres:12261.                                                                                                                               | 265911_at   | 0.9 |
| hypothetical protein predicted by genscan                                                                                                                                                  | 265879_at   | 0.9 |
| unknown protein                                                                                                                                                                            | 265779_at   | 0.9 |
| unknown protein ; supported by cDNA: gi_15450376_gb_AY052289.1_                                                                                                                            | 265657_at   | 0.9 |
| putative cAMP-dependent protein kinase                                                                                                                                                     | 265581_at   | 0.9 |
| putative microtubule-associated protein ;supported by full-length cDNA: Ceres:3416.                                                                                                        | 265510_at   | 0.9 |
| unknown protein similarity to ubiquitin family of proteins; supported by cDNA: gi_16930424_gb_AF419566.1_AF419566                                                                          | 265461_at   | 0.9 |
| hypothetical protein predicted by genscan; supported by full-length cDNA: Ceres: 32660.                                                                                                    | 265402_at   | 0.9 |
| putative AAA-type ATPase similar to 26S proteasome regulatory subunit 8; supported by cDNA: gi_15450827_gb_AY054494.1_                                                                     | 265340_at   | 0.9 |
| putative MYB family transcription factor                                                                                                                                                   | 265301_s_at | 0.9 |
| beta-fructosidase nearly identical to beta-fructosidase GB:CAA67560 GI:1429209 (Arabidopsis thaliana); supported by cDNA: gi_14517549_gb_AY037205.1_                                       | 265118_at   | 0.9 |
| carboxyphosphoenolpyruvate mutase, putative similar to carboxyphosphoenolpyruvate mutase GI:47149 from [Streptomyces hygroscopicus]; supported by cDNA: gi_13926184_gb_AF370567.1_AF370567 | 264954_at   | 0.9 |
| auxin-induced protein, putative similar to auxin-induced atb2 GI:6562980 from [Arabidopsis thaliana]; supported by cDNA: gi_6562979_gb_AY037205.1_                                         | 264958_at   | 0.9 |
| hypothetical protein similar to hypothetical protein GB:O14360                                                                                                                             | 264928_at   | 0.9 |
| unknown protein similar to ESTs gb T22270 and gb T76886                                                                                                                                    | 264818_at   | 0.9 |
| putative protein kinase similar to MAP3K delta-1 protein kinase (Y14199); supported by cDNA: gi_11127924_gb_AF305913.1_AF305913                                                            | 264797_at   | 0.9 |
| putative leucyl-tRNA synthetase Strong similarity to S. pombe leucyl-tRNA synthetase (gb Z73100)                                                                                           | 264780_at   | 0.9 |
| cysteine protease XBPC3 identical to papain-like cysteine peptidase XBPC3 GI:14600257 from [Arabidopsis thaliana]                                                                          | 264705_at   | 0.9 |
| allyl alcohol dehydrogenase, putative similar to allyl alcohol dehydrogenase GI:9758497 from [Arabidopsis thaliana]; supported by cDNA: gi_14600257_gb_AY037205.1_                         | 264687_at   | 0.9 |
| putative sensory transduction histidine kinase similar to GB:AAD21777; similar to ESTs gb AA712891 and gb AA042438; supported by cDNA: gi_14600257_gb_AY037205.1_                          | 264637_at   | 0.9 |
| unknown protein similar to EST gb AA598098;supported by full-length cDNA: Ceres:23916.                                                                                                     | 264448_at   | 0.9 |
| putative mitogen-activated protein kinase, MAP Kinase 1 similar to ESTs gb T41567 and gb R30629; supported by cDNA: gi_464136_dbj_D1                                                       | 264467_at   | 0.9 |
|                                                                                                                                                                                            | 264405_at   | 0.9 |

|                                                                                                                                                      |             |     |
|------------------------------------------------------------------------------------------------------------------------------------------------------|-------------|-----|
| hypothetical protein contains similarity to ubiquitin protein ligase GI:2827198 from [Mus musculus]                                                  | 264335_s_at | 0.9 |
| hypothetical protein similar to hypothetical protein GI:5541664 from [Arabidopsis thaliana]                                                          | 264308_at   | 0.9 |
| unknown protein                                                                                                                                      | 264254_at   | 0.9 |
| putative calcium-binding protein, calreticulin similar to GB:AAA80652;supported by full-length cDNA: Ceres:27210.                                    | 264260_at   | 0.9 |
| hypothetical protein predicted by genemark.hmm; supported by cDNA: gi_13430619_gb_AF360222.1_AF360222                                                | 264192_at   | 0.9 |
| unknown protein Similar to hypothetical protein C34B7.2 gb 1729503 from C. elegans cosmid gb Z83220                                                  | 264197_at   | 0.9 |
| unknown protein ESTs gb Z34075, gb Z34835 and gb AA404888 come from this gene                                                                        | 264198_at   | 0.9 |
| putative tRNA adenylyltransferase Similar to tRNA adenylyltransferase gb U15930 from Lupinus albus. EST gb AA721797 comes from this ge               | 264212_at   | 0.9 |
| unknown protein                                                                                                                                      | 264154_at   | 0.9 |
| unknown protein ; supported by cDNA: gi_15450672_gb_AY052704.1_                                                                                      | 264123_at   | 0.9 |
| enolase (2-phospho-D-glycerate hydrolase) ; supported by cDNA: gi_15809969_gb_AY054253.1_                                                            | 263924_at   | 0.9 |
| hypothetical protein predicted by genscan; supported by cDNA: gi_16648990_gb_AY059865.1_                                                             | 263883_at   | 0.9 |
| unknown protein                                                                                                                                      | 263708_at   | 0.9 |
| unknown protein                                                                                                                                      | 263654_at   | 0.9 |
| glycine-rich RNA binding protein 7 Alternative splicing exists based on EST evidence, form 1 splice site is AG , form 2 splice site is AT            | 263548_at   | 0.9 |
| 14-3-3 protein GF14mu (grf9) identical to GF14 mu GI:3551052, SP:Q96299 from [Arabidopsis thaliana];supported by full-length cDNA: Cere              | 263494_at   | 0.9 |
| putative bZIP transcription factor contains a bZIP transcription factor basic domain signature (PDOC00036); supported by cDNA: gi_1545083;           | 263414_at   | 0.9 |
| unknown protein ; supported by cDNA: gi_15810336_gb_AY056207.1_                                                                                      | 263326_at   | 0.9 |
| putative methylmalonate semi-aldehyde dehydrogenase                                                                                                  | 263275_at   | 0.9 |
| putative pre-mRNA splicing factor similar to splicing factor hPRP17 (gi 3283220); similar to ESTs emb F15435 and dbj AUO62661                        | 263261_at   | 0.9 |
| hypothetical protein predicted by genscan+                                                                                                           | 263220_at   | 0.9 |
| putative lipamide dehydrogenase component of the pyruvate dehydrogenase complex E3, contains PF 00010 helix-loop-helix DNA-binding i                 | 263117_at   | 0.9 |
| flavanone 3-hydroxylase, putative similar to flavanone 3-hydroxylase GI:727410 from [Persea americana]; supported by cDNA: gi_13507544,              | 263135_at   | 0.9 |
| hypothetical protein predicted by genscan and genefinder;supported by full-length cDNA: Ceres:95679.                                                 | 263097_at   | 0.9 |
| putative alanine aminotransferase similar to alanine aminotransferase GB:BAA77260 GI:4730884 from [Oryza sativa]; supported by ct                    | 262988_at   | 0.9 |
| hypothetical protein contains similarity to DNA-binding protein (PcMYB1) GI:2224896 from [Petroselinum crispum]                                      | 263007_at   | 0.9 |
| Dhp1-like protein similar to Dhp1 protein GB:BAA04601 GI:496393 from [Schizosaccharomyces pombe]; supported by cDNA: gi_11875627_c                   | 262923_at   | 0.9 |
| hypothetical protein contains similarity to protein kinase (PK6) GI:170046 from [Glycine max]                                                        | 262934_s_at | 0.9 |
| hypothetical protein predicted by genemark.hmm                                                                                                       | 262874_at   | 0.9 |
| plastid RNA polymerase sigma-subunit identical to plastid RNA polymerase sigma-subunit GI:2398851 from [Arabidopsis thaliana]; supported             | 262879_at   | 0.9 |
| putative SPL1-related protein similar to GB:CAB56770, part of the SBP-box gene family that codes for transcription factors                           | 262798_at   | 0.9 |
| anter-specific proline-rich -like protein (APG-like) similar to anter-specific proline-rich protein (APG) SP:P40602 [Arabidopsis thaliana (Mouse-    | 262682_at   | 0.9 |
| integral membrane protein, putative contains Pfam profile: PF00892 Integral membrane protein DUF6                                                    | 262623_at   | 0.9 |
| unknown protein ESTs gb N96028, gb F14286, gb T20680, gb F14443, gb AA657300 and gb N65244 come from this gene; supported by cDI                     | 262505_at   | 0.9 |
| threonine synthase, putative similar to threonine synthase GI:4850369 from [Arabidopsis thaliana]                                                    | 262380_at   | 0.9 |
| unknown protein similar to hypothetical protein GB:AAF07360 from [Arabidopsis thaliana]; supported by cDNA: gi_15810007_gb_AY054272.1                | 262346_at   | 0.9 |
| unknown protein ;supported by full-length cDNA: Ceres:8932.                                                                                          | 262313_at   | 0.9 |
| unknown protein ; supported by cDNA: gi_13605689_gb_AF361826.1_AF361826                                                                              | 262272_at   | 0.9 |
| root hairless 1 (RHL1) similar to root hairless 1 GI:3219355 from [Arabidopsis thaliana]; supported by cDNA: gi_3219354_gb_AF062371.1_AF             | 262249_at   | 0.9 |
| GTP-binding protein, putative similar to GTP-binding protein GB:AAF31009 GI:6899606 from [Ureaplasma urealyticum]                                    | 262086_at   | 0.9 |
| unknown protein                                                                                                                                      | 262003_at   | 0.9 |
| unknown protein                                                                                                                                      | 261853_at   | 0.9 |
| hypothetical protein predicted by genemark.hmm; supported by cDNA: gi_14517415_gb_AY039543.1_                                                        | 261861_at   | 0.9 |
| DNA-binding protein, putative similar to helicase-like transcription factor GB:CAA86572 GI:1658307 from [Homo sapiens]; supported by cDN,            | 261862_at   | 0.9 |
| hypothetical protein contains similarity to 17-beta-hydroxysteroid dehydrogenase type IV GI:2315980 from [Gallus gallus]                             | 261771_at   | 0.9 |
| small nuclear ribonucleoprotein, putative similar to small nuclear ribonucleoprotein GI:600749 from [Homo sapiens]; supported by full-length c       | 261725_at   | 0.9 |
| hypothetical protein predicted by genemark.hmm                                                                                                       | 261655_at   | 0.9 |
| unknown protein ; supported by cDNA: gi_15294231_gb_AF410307.1_AF410307                                                                              | 261582_at   | 0.9 |
| protein kinase identical to protein kinase GI:2852447 from [Arabidopsis thaliana]; supported by cDNA: gi_2852446_dbj_D88206.1_D88206                 | 261526_at   | 0.9 |
| homeobox transcription factor Hox7, putative similar to homeobox transcription factor Hox7 GI:19486 from [Lycopersicon peruvianum]                   | 261494_at   | 0.9 |
| hypothetical protein predicted by genemark.hmm                                                                                                       | 261500_at   | 0.9 |
| hypothetical protein predicted by genscan+                                                                                                           | 261463_at   | 0.9 |
| unknown protein similar to Glu-tRNA Gln amidotransferase subunit B GB:AAB83965; supported by cDNA: gi_11078539_gb_AF239836.1_AF2                     | 261307_at   | 0.9 |
| unknown protein                                                                                                                                      | 261259_at   | 0.9 |
| hypothetical protein predicted by genemark.hmm                                                                                                       | 261238_at   | 0.9 |
| heat shock factor protein hsf8, putative predicted by genemark.hmm; supported by cDNA: gi_15028376_gb_AY045991.1_                                    | 261206_at   | 0.9 |
| uridine diphosphate glucose epimerase identical to GB:CAA90941 from [Arabidopsis thaliana] (Arch. Biochem. Biophys. 327 (1), 27-34 (1996             | 261211_at   | 0.9 |
| hypothetical protein predicted by genemark.hmm                                                                                                       | 261132_at   | 0.9 |
| unknown protein                                                                                                                                      | 261071_at   | 0.9 |
| molybdopterin biosynthesis CNX3 protein, putative similar to molybdopterin biosynthesis CNX3 protein GB:Q39056 from [Arabidopsis thalian             | 261044_at   | 0.9 |
| ATP-dependent Clp protease proteolytic subunit (ClpP5) identical to nClpP1 GB:BAA82065 GI:5360579 from [Arabidopsis thaliana];supportec              | 260912_at   | 0.9 |
| decoy identical to GB:AAB51588 GI:1931612 from [Arabidopsis thaliana]; supported by cDNA: gi_1842110_gb_U87586.1_ATU87586                            | 260781_at   | 0.9 |
| hypothetical protein predicted by genscan+                                                                                                           | 260785_at   | 0.9 |
| serine/threonine phosphatase PP7, putative similar to GB:CAA03886 from [Arabidopsis thaliana] (Biochem. Mol. Biol. Int. 44 (4), 703-715 (19          | 260717_at   | 0.9 |
| putative pre-mRNA splicing factor RNA helicase                                                                                                       | 260525_at   | 0.9 |
| ferredoxin precursor isolog ;supported by full-length cDNA: Ceres:20637.                                                                             | 260481_at   | 0.9 |
| Eukaryotic initiation factor 5A , putative similar to eukaryotic initiation factor 5A (2) (Nicotiana plumbaginifolia) GI:19702;supported by full-ler | 260350_at   | 0.9 |
| unknown protein ; supported by full-length cDNA: Ceres: 96657.                                                                                       | 260356_at   | 0.9 |
| putative acetylmethionine transaminase similar to ACETYLMETHIONINE AMINOTRANSFERASE PRECURSOR (ACOAT) GB:O04866 from (Aln                            | 260286_at   | 0.9 |
| hypothetical protein predicted by genscan+                                                                                                           | 259959_at   | 0.9 |
| arm repeat-containing protein, putative similar to GI:2558938 from [Brassica napus] (Proc. Natl. Acad. Sci. U.S.A. 95 (1), 382-387 (1998))           | 259826_at   | 0.9 |
| nodule inception protein, putative similar to nodule inception protein GI:6448579 from (Lotus japonicus)                                             | 259540_at   | 0.9 |
| dioxygenase, putative similar to dioxygenase GI:1666096 from [Marah macrocarpus]                                                                     | 259445_at   | 0.9 |
| unknown protein ; supported by full-length cDNA: Ceres: 20582.                                                                                       | 259403_at   | 0.9 |
| unknown protein                                                                                                                                      | 259302_at   | 0.9 |
| putative nucleotide repair protein similar to nucleotide repair protein GB:CAA05781 from [Lilium longiflorum];supported by full-length cDNA: C       | 259304_at   | 0.9 |
| unknown protein ;supported by full-length cDNA: Ceres:142966.                                                                                        | 259305_at   | 0.9 |
| putative DNA binding protein similarity to RAV2 DNA binding protein GB:BAA34251 [Arabidopsis thaliana]                                               | 259293_at   | 0.9 |
| unknown protein ; supported by cDNA: gi_15028084_gb_AY045899.1_                                                                                      | 259230_at   | 0.9 |
| unknown protein ;supported by full-length cDNA: Ceres:102038.                                                                                        | 259184_at   | 0.9 |
| putative sodium proton exchanger similar to sodium proton exchanger Nhx1 GB:AAD16946 [Arabidopsis thaliana]                                          | 259081_at   | 0.9 |
| DegP protease contains similarity to degP GI:2623992 from [Bradyrhizobium japonicum]                                                                 | 259048_at   | 0.9 |
| unknown protein N-terminus similar to unknown protein GB:AAD25613 [Arabidopsis thaliana]; supported by full-length cDNA: Ceres: 38529.               | 258921_at   | 0.9 |



|                                                                                                                                             |           |     |
|---------------------------------------------------------------------------------------------------------------------------------------------|-----------|-----|
| putative RHO GDP-dissociation inhibitor 1 similar to RHO GDP-dissociation inhibitor 1 GB:P19803 [Bos taurus];supported by full-length cDNA  | 258637_at | 0.9 |
| putative transitional endoplasmic reticulum ATPase identical to cell division cycle protein 48 (CDC48) homolog GB:P54609 (EMBO J. 14 (22)   | 258649_at | 0.9 |
| putative mudrA protein similar to mudrA protein GB:S59141 [Zea mays]                                                                        | 258550_at | 0.9 |
| hypothetical protein similar to receptor protein kinases: GB:CAB43834, GB:S71277 [Arabidopsis thaliana]                                     | 258557_at | 0.9 |
| hypothetical protein similar to hypothetical protein GB:CAB57979 from [Lycopersicon esculentum]                                             | 258406_at | 0.9 |
| unknown protein contains GMC oxidoreductase domain; supported by cDNA: gi_13605691_gb_AF361827.1_AF361827                                   | 258299_at | 0.9 |
| unknown protein                                                                                                                             | 258202_at | 0.9 |
| putative GTP pyrophosphokinase similar to GTP PYROPHOSPHOKINASE GB:O87331 from [Corynebacterium glutamicum]; supported by cD                | 258207_at | 0.9 |
| hypothetical protein predicted by genemark.hmm;supported by full-length cDNA: Ceres:20484.                                                  | 258161_at | 0.9 |
| hypothetical protein predicted by genemark.hmm                                                                                              | 258126_at | 0.9 |
| unknown protein contains Pfam profile: PF01738 diene lactone hydrolase family; supported by cDNA: gi_13899072_gb_AF370531.1_AF3705          | 258108_at | 0.9 |
| unknown protein                                                                                                                             | 258015_at | 0.9 |
| putative protein kinase, ATN1 almost identical (1 amino acid) to GB:S61766 from [Arabidopsis thaliana]; supported by cDNA: gi_16604327_g    | 257972_at | 0.9 |
| gda-1, putative similar to gda-1 GB:CAA74993 from [Pisum sativum];supported by full-length cDNA: Ceres:3049.                                | 257790_at | 0.9 |
| chorismate mutase identical to chorismate mutase GB:Z26519 [Arabidopsis thaliana];supported by full-length cDNA: Ceres:39613.               | 257746_at | 0.9 |
| hypothetical protein predicted by genemark.hmm                                                                                              | 257721_at | 0.9 |
| unknown protein contains Pfam profile: PF00400 WD domain, G-beta repeat; supported by cDNA: gi_15081810_gb_AY048298.1_                      | 257661_at | 0.9 |
| unknown protein                                                                                                                             | 257594_at | 0.9 |
| unknown protein                                                                                                                             | 257611_at | 0.9 |
| hypothetical protein predicted by genscan+                                                                                                  | 257208_at | 0.9 |
| exonuclease, putative contains Pfam profile: PF00929 exonuclease;supported by full-length cDNA: Ceres:39883.                                | 257211_at | 0.9 |
| RING zinc finger protein contains Pfam profile: PF00097 zinc finger, C3HC4 type (RING finger)                                               | 257081_at | 0.9 |
| unknown protein similar to unknown protein GB:AAD43153 from [Arabidopsis thaliana]                                                          | 256944_at | 0.9 |
| unknown protein similar to alpha galactosidase GB:AAA73963 [Glycine max]                                                                    | 256866_at | 0.9 |
| unknown protein ; supported by cDNA: gi_13899104_gb_AF370547.1_AF370547                                                                     | 256683_at | 0.9 |
| hypothetical protein predicted by genscan+                                                                                                  | 256605_at | 0.9 |
| unknown protein supported by full-length cDNA: Ceres:42677.                                                                                 | 256543_at | 0.9 |
| unknown protein                                                                                                                             | 256534_at | 0.9 |
| NADPH oxidoreductase, putative similar to GI:1708420 from [Arabidopsis thaliana] (J. Biol. Chem. 270 (44), 26224-26231 (1995));supported    | 256454_at | 0.9 |
| unknown protein ;supported by full-length cDNA: Ceres:10857.                                                                                | 256301_at | 0.9 |
| NADP-specific glutamate dehydrogenase, putative similar to NADP-specific glutamate dehydrogenase (NADP-GDH) SP:P28724 [Giardia              | 256174_at | 0.9 |
| ubiquitin-specific protease 6 (UBP6), putative similar to GI:11993465;supported by full-length cDNA: Ceres:116145.                          | 256179_at | 0.9 |
| glycine hydroxymethyltransferase, putative similar to glycine hydroxymethyltransferase GI:438246 from [Solanum tuberosum]                   | 255946_at | 0.9 |
| unknown protein                                                                                                                             | 255963_at | 0.9 |
| hypothetical protein similar to RING3-like bromodomain protein GI:3033386 from [Arabidopsis thaliana]; supported by cDNA: gi_15810438_gt    | 255906_at | 0.9 |
| putative CONSTANS-like B-box zinc finger protein                                                                                            | 255839_at | 0.9 |
| Expressed protein ; supported by full-length cDNA: Ceres: 39479.                                                                            | 255671_at | 0.9 |
| putative potassium/H+ antiporter                                                                                                            | 255686_at | 0.9 |
| Expressed protein ; supported by full-length cDNA: Ceres: 36229.                                                                            | 255602_at | 0.9 |
| hypothetical protein                                                                                                                        | 255615_at | 0.9 |
| hypothetical protein                                                                                                                        | 255593_at | 0.9 |
| putative zinc finger protein identical to T10M13.22 ; supported by cDNA: gi_14334911_gb_AY035129.1_                                         | 255508_at | 0.9 |
| putative symbiosis-related protein ;supported by full-length cDNA: Ceres:119712.                                                            | 255283_at | 0.9 |
| F-box protein family, AtFBW2 contains similarity to N7 protein GI:3273101 from [Medicago truncatula];supported by full-length cDNA: Ceres:1 | 255066_at | 0.9 |
| putative protein                                                                                                                            | 255077_at | 0.9 |
| putative protein predicted protein W02G9.1 Caenorhabditis elegans cosmid W02G9, PID:g3165571; supported by cDNA: gi_15450340_gb_A           | 254863_at | 0.9 |
| hypothetical protein ; supported by cDNA: gi_16648694_gb_AY058123.1_                                                                        | 254814_at | 0.9 |
| putative protein predicted protein, Saccharomyces cerevisiae;supported by full-length cDNA: Ceres:33190.                                    | 254830_at | 0.9 |
| putative protein G9A protein, Mus musculus, AF109906; supported by cDNA: gi_13517758_gb_AF344452.1_AF344452                                 | 254745_at | 0.9 |
| putative protein IFA-binding protein, Arabidopsis thaliana, AF004556                                                                        | 254724_at | 0.9 |
| methionyl-tRNA synthetase - like protein methionyl-tRNA synthetase, Oryza sativa, AF040700                                                  | 254734_at | 0.9 |
| putative protein kinase ; supported by cDNA: gi_13249122_gb_AF295667.1_AF295667                                                             | 254636_at | 0.9 |
| hypothetical protein                                                                                                                        | 254455_at | 0.9 |
| putative protein                                                                                                                            | 254417_at | 0.9 |
| Expressed protein ; supported by full-length cDNA: Ceres: 16643.                                                                            | 254388_at | 0.9 |
| CDP-diacylglycerol synthetase-like protein CDP-diacylglycerol synthetase, Arabidopsis thaliana, PATCHX:E218681;supported by full-length c   | 254360_at | 0.9 |
| putative Ap2 domain protein DNA-binding protein Pti6 - Lycopersicon esculentum,PID:g2213785; supported by cDNA: gi_15982736_gb_AY0          | 254235_at | 0.9 |
| putative protein hypothetical protein, Synechocystis sp., PIR:S76577;supported by full-length cDNA: Ceres:30708.                            | 254187_at | 0.9 |
| Expressed protein ; supported by full-length cDNA: Ceres: 28506.                                                                            | 254190_at | 0.9 |
| Rab geranylgeranyl transferase like protein (fragment) Rab geranylgeranyl transferase (EC 2.5.1.-) alpha chain, human, PIR2:JC5538          | 254156_at | 0.9 |
| HSP90-like protein HSP90 homolog - Catharanthus roseus, PIR2:S39558; supported by cDNA: gi_14532541_gb_AY039895.1_                          | 254166_at | 0.9 |
| superoxide dismutase (EC 1.15.1.1) (Fe)(fragment) ;supported by full-length cDNA: Ceres:32935.                                              | 254098_at | 0.9 |
| putative protein various predicted proteins, Arabidopsis thaliana;supported by full-length cDNA: Ceres:20902.                               | 254081_at | 0.9 |
| sucrase-like protein sucrose cleavage protein - potato, Pir2:S51376;supported by full-length cDNA: Ceres:111209.                            | 253980_at | 0.9 |
| putative protein                                                                                                                            | 253805_at | 0.9 |
| arginine methyltransferase (pam1) ; supported by full-length cDNA: Ceres: 38601.                                                            | 253695_at | 0.9 |
| putative protein myosin heavy chain, neuronal, Rattus norvegicus, Pir1:S21801; supported by cDNA: gi_14334773_gb_AY035060.1_                | 253523_at | 0.9 |
| putative zinc finger protein hypothetical protein YLR387c, Saccharomyces cerevisiae, PIR2:S51474; supported by cDNA: gi_13878012_gb_A       | 253526_at | 0.9 |
| putative protein ribosomal protein YmL14 precursor, mitochondrial - Saccharomyces cerevisiae,PIR2:S50921;supported by full-length cDNA:     | 253538_at | 0.9 |
| P-Protein - like protein P-Protein precursor, Solanum tuberosum, gb:Z99770; supported by cDNA: gi_14596024_gb_AY042800.1_                   | 253387_at | 0.9 |
| aminopeptidase- like protein aminopeptidase, Mus musculus, U35646                                                                           | 253360_at | 0.9 |
| putative protein ThiJ protein, Escherichia coli, PIR:H64771                                                                                 | 253320_at | 0.9 |
| putative protein RING-finger protein, Lotus japonicus, PIR2:S49446                                                                          | 253265_at | 0.9 |
| hypothetical protein                                                                                                                        | 253288_at | 0.9 |
| bZIP transcription factor ATB2                                                                                                              | 253245_at | 0.9 |
| putative protein                                                                                                                            | 253208_at | 0.9 |
| protein kinase - like protein protein kinase SRPK1, Mus musculus, PID:d1026227                                                              | 253137_at | 0.9 |
| putative protein transcription factor IIIB chain BRF1, Saccharomycescerevisiae, PIR2:A44072                                                 | 253144_at | 0.9 |
| putative protein ribonuclease III, Bacillus subtilis, PIR2:B69693                                                                           | 253095_at | 0.9 |
| cytochrome P450-like protein                                                                                                                | 253097_at | 0.9 |
| glycine hydroxymethyltransferase like protein glycine hydroxymethyltransferase -Solanum tuberosum,PID:g438247;supported by full-length c    | 253009_at | 0.9 |
| putative protein T19C21.18 Arabidopsis thaliana chromosome II BAC T19C21 genomic sequence, PID:g3395439                                     | 252986_at | 0.9 |
| ES43 like protein ES43 protein - barley, PIR2:S44281;supported by full-length cDNA: Ceres:8278.                                             | 252925_at | 0.9 |

|                                                                                                                                                                                                             |             |     |
|-------------------------------------------------------------------------------------------------------------------------------------------------------------------------------------------------------------|-------------|-----|
| putative protein ;supported by full-length cDNA: Ceres:125922.                                                                                                                                              | 252945_at   | 0.9 |
| putative protein                                                                                                                                                                                            | 252909_at   | 0.9 |
| putative protein ;supported by full-length cDNA: Ceres:5968.                                                                                                                                                | 252880_at   | 0.9 |
| GTP-binding - like protein GTP-binding protein DRG, <i>Xenopus laevis</i> , SWISS-PROT:P43690; supported by cDNA: gi_14334721_gb_AY035C                                                                     | 252883_at   | 0.9 |
| myo-inositol-1-phosphate synthase ;supported by full-length cDNA: Ceres:1978.                                                                                                                               | 252863_at   | 0.9 |
| putative protein predicted protein, <i>Drosophila melanogaster</i> , EMBL:AE003789                                                                                                                          | 252738_at   | 0.9 |
| hypothetical protein ; supported by full-length cDNA: Ceres: 281.                                                                                                                                           | 252723_at   | 0.9 |
| hypothetical protein SPOP protein, <i>Homo sapiens</i> , EMBL:HSJ000644                                                                                                                                     | 252701_at   | 0.9 |
| putative protein predicted protein, <i>C.elegans</i> , PIR:T24538                                                                                                                                           | 252680_at   | 0.9 |
| putative protein KIAA0073, <i>Homo sapiens</i> , EMBL:HSORF006                                                                                                                                              | 252644_at   | 0.9 |
| serine threonine-protein kinase-like protein Ca2+ calmodulin-dependent protein kinase - <i>Rattus norvegicus</i> , PIR:A57156; supported by cDNA                                                            | 252616_at   | 0.9 |
| putative protein tRNA nucleotidyltransferase, <i>Methanobacterium thermoautotrophicum</i> , PIR:A69191                                                                                                      | 252508_at   | 0.9 |
| betaine aldehyde dehydrogenase-like protein betaine aldehyde dehydrogenase - <i>Amaranthus hypochondriacus</i> ,PID:g2388710; supported by Expressed protein ; supported by full-length cDNA: Ceres: 26537. | 252354_at   | 0.9 |
| peroxidase ;supported by full-length cDNA: Ceres:39678.                                                                                                                                                     | 252291_s_at | 0.9 |
| putative protein hypothetical protein L1648.04 - <i>Leishmania major</i> , EMBL:LMFL1648                                                                                                                    | 252139_at   | 0.9 |
| epoxide hydrolase-like protein epoxide hydrolase homolog - <i>Glycine max</i> , PIR:T07145; supported by cDNA: gi_13937212_gb_AF372961.1_ /                                                                 | 252095_at   | 0.9 |
| putative protein hin1 protein - <i>Nicotiana tabacum</i> .PID:e259431;supported by full-length cDNA: Ceres:92178.                                                                                           | 252058_at   | 0.9 |
| splicing factor - like protein splicing factor, arginine/serine-rich 7, <i>Homo sapiens</i> , PIR:A57198                                                                                                    | 251943_at   | 0.9 |
| putative protein KIAA0544 protein, <i>Homo sapiens</i> , EMBL:AB011116;supported by full-length cDNA: Ceres:110247.                                                                                         | 251959_at   | 0.9 |
| sigma factor SigC ; supported by cDNA: gi_2353174_gb_AF015544.1_AF015544                                                                                                                                    | 251929_at   | 0.9 |
| pasticcino 1 ; supported by cDNA: gi_15810452_gb_AY056265.1_                                                                                                                                                | 251932_at   | 0.9 |
| putative protein proteophosphoglycan, <i>Leishmania major</i> , PIR:T46707supported by full-length cDNA: Ceres:6954.                                                                                        | 251859_at   | 0.9 |
| putative protein unnamed sequence, <i>Homo sapiens</i> , EMBL:AK001088; supported by cDNA: gi_15215685_gb_AY050371.1_                                                                                       | 251828_at   | 0.9 |
| putative protein predicted proteins, <i>Arabidopsis thaliana</i>                                                                                                                                            | 251749_at   | 0.9 |
| putative protein TATA-binding protein-binding protein, ABT1 - <i>Mus musculus</i> , EMBL:AB021860                                                                                                           | 251690_at   | 0.9 |
| hypothetical protein                                                                                                                                                                                        | 251650_at   | 0.9 |
| dnaJ-like protein DNAJ protein - <i>Schizosaccharomyces pombe</i> , PIR:T39697:supported by full-length cDNA: Ceres:120719.                                                                                 | 251622_at   | 0.9 |
| putative protein ;supported by full-length cDNA: Ceres:29384., Ceres:101256.                                                                                                                                | 251558_at   | 0.9 |
| ATP-dependent RNA helicase-like protein ATP-dependent RNA helicase - <i>Xenopus laevis</i> , PIR:S13654;supported by full-length cDNA: Cere:                                                                | 251529_at   | 0.9 |
| putative protein RanBP7/impartin 7 - <i>Homo sapiens</i> , EMBL:AF098799                                                                                                                                    | 251495_at   | 0.9 |
| putative protein polyamine oxidase (EC 1.5.3.11) precursor - <i>Zea mays</i> plasmid pCR2.1;supported by full-length cDNA: Ceres:16421.                                                                     | 251505_at   | 0.9 |
| actin - like protein actin 3, <i>Drosophila melanogaster</i> , PIR:A03000:supported by full-length cDNA: Ceres:38096.                                                                                       | 251340_at   | 0.9 |
| putative protein ISOPENICILLIN N EPIMERASE - <i>Streptomyces clavuligerus</i> , EMBL:M32324;supported by full-length cDNA: Ceres:27922.                                                                     | 251260_at   | 0.9 |
| putative protein hypothetical protein BAA87851.1 - <i>Oryza sativa</i> , EMBL:AP000816                                                                                                                      | 251267_at   | 0.9 |
| cyclophilin -like protein CDC28/cdc2-like kinase associating arginine-serine cyclophilin, <i>Homo sapiens</i> , PIR:JC5314                                                                                  | 251177_at   | 0.9 |
| putative protein putative hydrolase At2g32150 - <i>Arabidopsis thaliana</i> , EMBL:AC006223:supported by full-length cDNA: Ceres:36724.                                                                     | 251028_at   | 0.9 |
| ubiquitin-specific protease 12 (UBP12) almost identical to ubiquitin-specific protease 12 GI:11993471 [ <i>Arabidopsis thaliana</i> ], one amino acid                                                       | 250693_at   | 0.9 |
| Mei2-like protein Mei2-like protein - <i>Arabidopsis thaliana</i> , EMBL:D86122                                                                                                                             | 250617_at   | 0.9 |
| myosin heavy chain-like protein ; supported by cDNA: gi_1732514_gb_U62744.1_ATU62744                                                                                                                        | 250548_at   | 0.9 |
| microbody NAD-dependent malate dehydrogenase ; supported by cDNA: gi_14335145_gb_AY037252.1_                                                                                                                | 250498_at   | 0.9 |
| putative protein predicted proteins, <i>Schizosaccharomyces pombe</i>                                                                                                                                       | 250281_at   | 0.9 |
| auxin responsive - like protein Nt-gh3 deduced protein, <i>Nicotiana tabacum</i> , EMBL:AF123503                                                                                                            | 250293_s_at | 0.9 |
| putative protein similar to unknown protein (emb CAB86638.1)                                                                                                                                                | 250202_at   | 0.9 |
| putative protein similar to unknown protein (ref NP_057085.1);supported by full-length cDNA: Ceres:38057.                                                                                                   | 250222_at   | 0.9 |
| putative protein various predicted proteins, <i>Arabidopsis thaliana</i>                                                                                                                                    | 250144_at   | 0.9 |
| APG5 (autophagy 5)-like protein                                                                                                                                                                             | 250088_at   | 0.9 |
| chromo domain protein polycomb-like protein, <i>Daucus carota</i> , PIR:T14294; supported by cDNA: gi_15625406_gb_AF387639.1_AF387639                                                                       | 250060_at   | 0.9 |
| MAP kinase -like protein ATMPK9, <i>Arabidopsis thaliana</i> , EMBL:AB038694                                                                                                                                | 249964_at   | 0.9 |
| putative protein similar to unknown protein (ref NP_015265.1); supported by cDNA: gi_12007446_gb_AF322255.1_AF322255                                                                                        | 249864_at   | 0.9 |
| putative protein similar to unknown protein (pir C72413)                                                                                                                                                    | 249849_at   | 0.9 |
| serine palmitoyltransferase ; supported by cDNA: gi_15292790_gb_AY050829.1_                                                                                                                                 | 249799_at   | 0.9 |
| nucleolar protein-like                                                                                                                                                                                      | 249672_at   | 0.9 |
| putative protein unnamed ORF, <i>Homo sapiens</i> , EMBL:AK001192                                                                                                                                           | 249611_at   | 0.9 |
| putative protein SIAH1 protein, <i>Brassica napus</i> , EMBL:BNA245479                                                                                                                                      | 249595_at   | 0.9 |
| RING finger -like protein RING-H2 zinc finger protein ATL4, <i>Arabidopsis thaliana</i> , EMBL:AF132014                                                                                                     | 249398_at   | 0.9 |
| urophorphyrin III methylase (gb AAB92676.1) ; supported by cDNA: gi_1146164_gb_L47479.1_ATHUPM1R                                                                                                            | 249325_at   | 0.9 |
| unknown protein                                                                                                                                                                                             | 249313_at   | 0.9 |
| MAP kinase ; supported by cDNA: gi_15983508_gb_AF424629.1_AF424629                                                                                                                                          | 249239_at   | 0.9 |
| FtsH protease, putative similar to FtsH protease GI:13183728 from [ <i>Medicago sativa</i> ]                                                                                                                | 249244_at   | 0.9 |
| brain and reproductive organ-expressed protein-like                                                                                                                                                         | 249192_at   | 0.9 |
| 1-aminocyclopropane-1-carboxylate oxidase ; supported by cDNA: gi_15983808_gb_AY056810.1_                                                                                                                   | 249128_at   | 0.9 |
| nuclear cap-binding protein; CBP20 (gb AAD29697.1) non-consensus AT donor splice site at exon 4, AC acceptor splice site at exon 5; supp                                                                    | 249036_at   | 0.9 |
| putative protein strong similarity to unknown protein (gb AAC61825.1); supported by cDNA: gi_15081732_gb_AY048259.1_                                                                                        | 248976_at   | 0.9 |
| unknown protein                                                                                                                                                                                             | 248956_at   | 0.9 |
| cullin ;supported by full-length cDNA: Ceres:101723.                                                                                                                                                        | 248882_at   | 0.9 |
| receptor-like protein kinase ; supported by cDNA: gi_13605826_gb_AF367312.1_AF367312                                                                                                                        | 248698_at   | 0.9 |
| heat shock protein 70 (gb AAF27639.1) ; supported by cDNA: gi_6746591_gb_AF217459.1_AF217459                                                                                                                | 248582_at   | 0.9 |
| histone acetyltransferase ;supported by full-length cDNA: Ceres:123936.                                                                                                                                     | 248508_at   | 0.9 |
| nucleotide-binding protein ; supported by cDNA: gi_13430793_gb_AF360309.1_AF360309                                                                                                                          | 248462_at   | 0.9 |
| unknown protein ;supported by full-length cDNA: Ceres:36309.                                                                                                                                                | 248378_at   | 0.9 |
| DNA-directed RNA polymerase II subunit-like protein ;supported by full-length cDNA: Ceres:8268.                                                                                                             | 248386_at   | 0.9 |
| beta-carotene hydroxylase                                                                                                                                                                                   | 248311_at   | 0.9 |
| PP2A regulatory subunit ;supported by full-length cDNA: Ceres:19116.                                                                                                                                        | 248300_at   | 0.9 |
| DnaJ protein-like                                                                                                                                                                                           | 248301_at   | 0.9 |
| 26S proteasome regulatory particle chain RPT6-like protein ;supported by full-length cDNA: Ceres:38213.                                                                                                     | 248220_at   | 0.9 |
| unknown protein ;supported by full-length cDNA: Ceres:22860.                                                                                                                                                | 248235_at   | 0.9 |
| GDSL-motif lipase/hydrolase-like protein                                                                                                                                                                    | 248118_at   | 0.9 |
| DNA topoisomerase I                                                                                                                                                                                         | 248109_at   | 0.9 |
| putative protein similar to unknown protein (ref NP_032765.1)                                                                                                                                               | 248081_at   | 0.9 |
| unknown protein ; supported by cDNA: gi_13899122_gb_AF370556.1_AF370556                                                                                                                                     | 248031_at   | 0.9 |
| putative protein similar to unknown protein (gb AAF54217.1)                                                                                                                                                 | 247993_at   | 0.9 |
| Ca2+-transporting ATPase-like protein (emb CAB79748.1)                                                                                                                                                      | 247937_at   | 0.9 |

|                                                                                                                                                      |             |     |
|------------------------------------------------------------------------------------------------------------------------------------------------------|-------------|-----|
| branched-chain amino acid aminotransferase-like protein                                                                                              | 247886_at   | 0.9 |
| 26S proteasome AAA-ATPase subunit RPT3 (gb)AAF22523.1)                                                                                               | 247810_at   | 0.9 |
| putative protein MNUDC protein, Homo sapiens, EMBL:AF100760                                                                                          | 247777_at   | 0.9 |
| thymidylate kinase - like protein thymidylate kinase, Arabidopsis thaliana, EMBL:AF081570;supported by full-length cDNA: Ceres:155539.               | 247735_at   | 0.9 |
| putative protein transcriptional repressor NOT4-N, Homo sapiens, EMBL:AF180475                                                                       | 247669_at   | 0.9 |
| putative protein contains similarity to DNA-binding protein;supported by full-length cDNA: Ceres:112281.                                             | 247430_at   | 0.9 |
| putative protein predicted proteins, Arabidopsis thaliana                                                                                            | 247395_at   | 0.9 |
| 1-deoxy-D-xylulose 5-phosphate reductoisomerase (DXR) ;supported by full-length cDNA: Ceres:117626.                                                  | 247401_at   | 0.9 |
| topoisomerase-like protein ;supported by full-length cDNA: Ceres:19433.                                                                              | 247374_at   | 0.9 |
| putative protein similar to unknown protein (sp)P54122)                                                                                              | 247385_at   | 0.9 |
| putative protein contains similarity to RNA-binding protein                                                                                          | 247276_at   | 0.9 |
| cdc2-like protein kinase ; supported by cDNA: gi_13430443_gb_AF360134.1_AF360134                                                                     | 247220_at   | 0.9 |
| WD repeat protein-like ;supported by full-length cDNA: Ceres:11277.                                                                                  | 247106_at   | 0.9 |
| unknown protein ; supported by cDNA: gi_14488062_gb_AF389279.1_AF389279                                                                              | 247046_at   | 0.9 |
| putative protein Leaf protein, Pharbitis nil, EMBL:D85101                                                                                            | 246901_at   | 0.9 |
| putative protein ;supported by full-length cDNA: Ceres:108509.                                                                                       | 246840_at   | 0.9 |
| glycine hydroxymethyltransferase - like protein glycine hydroxymethyltransferase, Solanum tuberosum, EMBL:Z25863; supported by cDNA: (               | 246800_at   | 0.9 |
| putative protein many predicted proteins, Arabidopsis thaliana                                                                                       | 246808_at   | 0.9 |
| putative protein hypothetical proteins - different species                                                                                           | 246768_at   | 0.9 |
| putative protein hypothetical protein F22F7.12 - Arabidopsis thaliana, EMBL:AC009606                                                                 | 246732_at   | 0.9 |
| putative protein hypothetical protein F14P3.15 - Arabidopsis thaliana, EMBL:AC009755                                                                 | 246564_at   | 0.9 |
| N2,N2-dimethylguanine tRNA methyltransferase-like protein several N2,N2-dimethylguanine tRNA methyltransferases                                      | 246521_at   | 0.9 |
| serine/threonine-specific protein kinase-like protein serine/threonine-specific protein kinase NPK15 - Nicotiana tabacum;supported by full-length    | 246529_at   | 0.9 |
| valine--tRNA ligase-like protein several bacterial valine--tRNA ligases                                                                              | 246509_at   | 0.9 |
| Inositol 1,3,4-Trisphosphate 5/6 kinase ;supported by full-length cDNA: Ceres:30653.                                                                 | 246451_at   | 0.9 |
| putative protein predicted protein, Drosophila melanogaster, EMBL:AE003450                                                                           | 246469_at   | 0.9 |
| putative protein cisplatin resistance-associated overexpressed protein - Homo sapiens, EMBL:AB034205; supported by cDNA: gi_15450598                 | 246436_at   | 0.9 |
| S-locus protein, putative similar to S-locus protein 5 Gl:6069485 from [Brassica rapa]                                                               | 246322_at   | 0.9 |
| high mobility group protein 2-like ; supported by cDNA: gi_15912190_gb_AY056373.1_                                                                   | 246311_at   | 0.9 |
| G-protein, putative contains Pfam profile: PF00503: G-protein alpha subunit                                                                          | 246312_at   | 0.9 |
| unknown protein                                                                                                                                      | 246261_at   | 0.9 |
| cytochrome P450, putative contains Pfam profile: PF00067: Cytochrome P450; supported by cDNA: gi_15912336_gb_AY056446.1_                             | 246268_at   | 0.9 |
| T-complex protein 1, beta subunit T-COMPLEX PROTEIN 1, BETA SUBUNIT, Homo sapiens, EMBL:AF026293;supported by full-length cDN                        | 246191_at   | 0.9 |
| 26S proteasome AAA-ATPase subunit RPT6a - like protein 26S proteasome AAA-ATPase subunit RPT6a, Arabidopsis thaliana, EMBL:AF12                      | 246147_s_at | 0.9 |
| putative protein predicted proteins, H. sapiens, D. melanogaster and others                                                                          | 246094_at   | 0.9 |
| putative protein thiamin pyrophosphokinase, Schizosaccharomyces pombe, PIR:S52350                                                                    | 246038_s_at | 0.9 |
| putative protein serine-arginine-rich splicing regulatory protein SRRP86, Rattus norvegicus, EMBL:AF234765                                           | 246039_at   | 0.9 |
| putative protein predicted proteins, Arabidopsis thaliana and others                                                                                 | 246052_at   | 0.9 |
| putative protein farnesyl cysteine carboxyl methyltransferase, Rattus norvegicus, EMBL:AF075595                                                      | 246053_at   | 0.9 |
| putative protein predicted proteins, Arabidopsis thaliana and Synecocystis sp.                                                                       | 246057_at   | 0.9 |
| putative protein predicted proteins, Arabidopsis thaliana                                                                                            | 246058_at   | 0.9 |
| rev interacting protein mis3 - like rev interacting protein mis3, Schizosaccharomyces pombe, PIR:T39981;supported by full-length cDNA: Cer           | 246060_at   | 0.9 |
| putative protein predicted proteins, Arabidopsis thaliana; supported by cDNA: gi_13877640_gb_AF370521.1_AF370521                                     | 246010_at   | 0.9 |
| cysteine proteinase RD21A identical to thiol protease RD21A SP:P43297 from [Arabidopsis thaliana]                                                    | 245803_at   | 0.9 |
| unknown protein contains similarity to calmodulin Gl:166304 from [Achylya klebsiana]; supported by cDNA: gi_13358218_gb_AF325029.2_AF:               | 245732_at   | 0.9 |
| calcium lipid binding protein - like GC donor splice site at exon 3; supported by cDNA: gi_16604592_gb_AY059741.1_                                   | 245702_at   | 0.9 |
| Expressed protein ; supported by cDNA: gi_535587_gb_L36113.1_ATHATJ                                                                                  | 245686_at   | 0.9 |
| mitochondrial protein (AtJ1), putative similar to mitochondrial protein (AtJ1) Gl:564030 from [Arabidopsis thaliana]; supported by cDNA: gi_56       | 245670_at   | 0.9 |
| Expressed protein ;supported by cDNA: Ceres:30129; supported by cDNA: gi:15028002                                                                    | 245602_at   | 0.9 |
| hypothetical protein                                                                                                                                 | 245501_at   | 0.9 |
| galactokinase like protein                                                                                                                           | 245478_at   | 0.9 |
| enoyl-CoA hydratase                                                                                                                                  | 245446_at   | 0.9 |
| hypothetical protein                                                                                                                                 | 245431_at   | 0.9 |
| trehalose-6-phosphate synthase like protein ;supported by full-length cDNA: Ceres:95947.                                                             | 245348_at   | 0.9 |
| hypothetical protein ;supported by full-length cDNA: Ceres:38042.                                                                                    | 245330_at   | 0.9 |
| scarecrow-like 13 (SCL13) ; supported by cDNA: gi_16930432_gb_AF419570.1_AF419570                                                                    | 245247_at   | 0.9 |
| viral resistance protein, putative, 5 partial similar to viral resistance protein Gl:7110565 from [Arabidopsis thaliana]                             | 245218_s_at | 0.9 |
| putative protein similarity to cDNA clones from human and mouse                                                                                      | 245178_at   | 0.9 |
| mitochondrial chaperonin (HSP60)                                                                                                                     | 245164_at   | 0.9 |
| putative receptor-like protein kinase                                                                                                                | 245130_at   | 0.9 |
| 4-alpha-glucanotransferase                                                                                                                           | 245094_at   | 0.9 |
| transcription factor IIB (TFIIB) identical to GB:P48512; contains a transcription factor TFIIB repeat signature (PDOC00624);supported by full-l      | 245114_at   | 0.9 |
| hypothetical protein predicted by genscan; similar to SPIP34568 YNNV5_CAEEL;supported by full-length cDNA: Ceres:8256.                               | 245062_at   | 0.9 |
| cytochrome c biogenesis orf382 Protein sequence is in conflict with the conceptual translation                                                       | 244912_at   | 0.9 |
| hypothetical protein                                                                                                                                 | 257322_at   | 0.9 |
| unknown protein                                                                                                                                      | 249100_at   | 0.9 |
| putative ATP-dependent RNA helicase similar to gb L13612 DEAD-box protein (dbp45A) from Drosophila melanogaster and is a member of P                 | 262706_at   | 0.8 |
| putative NAK-like ser/thr protein kinase similar to A. thaliana NAK ser/thr protein kinase, GenBank accession number P43293                          | 255559_at   | 0.8 |
| putative protein similar to unknown protein (pir) T05803)                                                                                            | 249319_s_at | 0.8 |
| putative protein contains similarity to phosphatidylinositol/phosphatidylcholine transfer protein                                                    | 248808_at   | 0.8 |
| unknown protein                                                                                                                                      | 247273_at   | 0.8 |
| putative protein hypothetical proteins - Arabidopsis thaliana                                                                                        | 246493_at   | 0.8 |
| putative protein                                                                                                                                     | 246088_at   | 0.8 |
| Arabidopsis thaliana /REF=U37281 /DEF=actin-2 mRNA, complete cds /LEN=1637 (-5, -M, -3 represent transcript regions 5 prime, Middle, a<-2-At-Actin-M | 267557_at   | 0.8 |
| unknown protein ; supported by cDNA: gi_11907565_gb_AF123315.1_AF123315                                                                              | 267368_at   | 0.8 |
| citrate synthase similar to GB:X17528, 10 possible frameshifts in that submission.;supported by full-length cDNA: Ceres:16528.                       | 267347_at   | 0.8 |
| hypothetical protein predicted by genefinder and genscan                                                                                             | 267319_at   | 0.8 |
| ABC transporter (AtMRP2) identical to GB:AF014960; transports glutathione conjugates; supported by cDNA: gi_2909780_gb_AF020288.1_                   | 267301_at   | 0.8 |
| ubiquitin activating enzyme 1 (UBA1) identical to GB:U80808                                                                                          | 267257_at   | 0.8 |
| putative casein kinase II catalytic (alpha) subunit ;supported by full-length cDNA: Ceres:38084.                                                     | 267269_at   | 0.8 |
| unknown protein                                                                                                                                      | 267152_at   | 0.8 |
| hypothetical protein predicted by graal; supported by full-length cDNA: Ceres: 35095.                                                                | 267163_at   | 0.8 |
| unknown protein                                                                                                                                      |             |     |

|                                                                                                                                              |             |     |
|----------------------------------------------------------------------------------------------------------------------------------------------|-------------|-----|
| unknown protein ; supported by full-length cDNA: Ceres: 16625.                                                                               | 267060_at   | 0.8 |
| unknown protein                                                                                                                              | 267071_at   | 0.8 |
| hypothetical protein predicted by genscan                                                                                                    | 267031_at   | 0.8 |
| unknown protein                                                                                                                              | 267017_at   | 0.8 |
| F-box protein LKP2/ADO2, AtFBX2c identical to Adagio 2 GI:13487070 from [Arabidopsis thaliana]                                               | 266935_at   | 0.8 |
| unknown protein ;supported by full-length cDNA: Ceres:35872.                                                                                 | 266806_at   | 0.8 |
| unknown protein                                                                                                                              | 266818_at   | 0.8 |
| putative cytochrome P450                                                                                                                     | 266778_at   | 0.8 |
| predicted by genscan                                                                                                                         | 266796_at   | 0.8 |
| copa-like retroelement pol polyprotein ; supported by cDNA: gi_15028176_gb_AY045911.1_                                                       | 266698_at   | 0.8 |
| putative N-acetyl-gamma-glutamyl-phosphate reductase ; supported by cDNA: gi_16604367_gb_AY058082.1_                                         | 266704_at   | 0.8 |
| unknown protein ;supported by full-length cDNA: Ceres:13821.                                                                                 | 266635_at   | 0.8 |
| putative transportin                                                                                                                         | 266523_at   | 0.8 |
| putative phospholipid cytidylyltransferase                                                                                                   | 266399_at   | 0.8 |
| unknown protein ; supported by full-length cDNA: Ceres: 948.                                                                                 | 266228_at   | 0.8 |
| putative RING zinc finger ankyrin protein ; supported by cDNA: gi_13926221_gb_AF370581.1_AF370581                                            | 266229_at   | 0.8 |
| putative glutathione S-transferase ; supported by cDNA: gi_15450462_gb_AY052332.1_                                                           | 266181_at   | 0.8 |
| putative protein phosphatase 2C ; supported by cDNA: gi_14517519_gb_AY039595.1_                                                              | 265886_at   | 0.8 |
| CDC27/NUC2-like protein TPR-repeat protein                                                                                                   | 265585_at   | 0.8 |
| hypothetical protein predicted by genscan; supported by cDNA: gi_15292678_gb_AY050773.1_                                                     | 265512_at   | 0.8 |
| unknown protein ; supported by full-length cDNA: Ceres: 122665.                                                                              | 265457_at   | 0.8 |
| unknown protein predicted by genscan; supported by cDNA: gi_16323050_gb_AY057629.1_                                                          | 265291_at   | 0.8 |
| putative spermidine synthase                                                                                                                 | 265172_at   | 0.8 |
| unknown protein ; supported by cDNA: gi_15912334_gb_AY056445.1_                                                                              | 265150_at   | 0.8 |
| hypothetical protein similar to RING-H2 finger protein RHC1a GB:AAC69854 GI:3790583 from [Arabidopsis thaliana]; supported by cDNA: gi_      | 265077_at   | 0.8 |
| unknown protein                                                                                                                              | 265098_at   | 0.8 |
| unknown protein ; supported by cDNA: gi_1669598_dbj_D88746.1_D88746                                                                          | 265059_at   | 0.8 |
| RNA binding protein, putative similar to RNA binding protein(RZ-1) GI:1435061 from [Nicotiana sylvestris];supported by full-length cDNA: Cer | 264921_at   | 0.8 |
| putative presenilin similar to presenilin GB:AAD23630;supported by full-length cDNA: Ceres:43026.                                            | 264807_at   | 0.8 |
| unknown protein location of EST embjF15151                                                                                                   | 264722_at   | 0.8 |
| hypothetical protein contains similarity to arginine/serine-rich protein GI:6601502 from [Arabidopsis thaliana]                              | 264715_at   | 0.8 |
| unknown protein EST gb R64758 comes from this gene; supported by cDNA: gi_15450400_gb_AY052301.1_                                            | 264676_at   | 0.8 |
| uracil phosphoribosyltransferase, putative similar to uracil phosphoribosyltransferase 1 GB:AAD28199 GI:4704662 from [Arabidopsis thaliana]  | 264561_at   | 0.8 |
| unknown protein similar to hypothetical protein HYP1 gb Z97338 from A. thaliana                                                              | 264389_at   | 0.8 |
| putative topoisomerase strong similarity to GB:CAA72903 from [Arabidopsis thaliana]; supported by cDNA: gi_14334597_gb_AY034972.1_           | 264206_at   | 0.8 |
| unknown protein ; supported by cDNA: gi_15810005_gb_AY054271.1_                                                                              | 264166_at   | 0.8 |
| hypothetical protein predicted by genemark.hmm; supported by cDNA: Ceres: 11408 (cDNA not full-length)                                       | 264141_at   | 0.8 |
| putative beta-galactosidase                                                                                                                  | 264078_at   | 0.8 |
| hypothetical protein predicted by genefinder                                                                                                 | 263938_at   | 0.8 |
| hypothetical protein ;supported by full-length cDNA: Ceres:123727.                                                                           | 263946_at   | 0.8 |
| putative auxin-responsive protein ; supported by cDNA: gi_15292854_gb_AY050861.1_                                                            | 263786_at   | 0.8 |
| putative plasma membrane proton ATPase                                                                                                       | 263791_at   | 0.8 |
| putative aspartate kinase-homoserine dehydrogenase almost identical to gb X71364 gene for aspartate kinase homoserine dehydrogenase fr       | 263696_at   | 0.8 |
| putative casein kinase I similar to GB:CAA55395                                                                                              | 263657_at   | 0.8 |
| putative RNA-binding protein ; supported by full-length cDNA: Ceres:803.                                                                     | 263356_at   | 0.8 |
| unknown protein ; supported by cDNA: gi_15027886_gb_AY045800.1_                                                                              | 263331_at   | 0.8 |
| Ca2+-dependent lipid-binding protein, putative similar to Ca2+-dependent lipid-binding protein (CLB1) GI:2789434 from [Lycopersicon escul    | 263205_at   | 0.8 |
| MAP kinase (ATMPK7) identical to GB:Q39027; MAP-mitogen activated protein kinase; supported by cDNA: gi_457405_dbj_D21843.1_ATH/             | 263065_at   | 0.8 |
| unknown protein ;supported by full-length cDNA: Ceres:13758.                                                                                 | 262955_at   | 0.8 |
| ATP-dependent Clp protease proteolytic subunit (ClpP6) identical to ATP-dependent Clp protease proteolytic subunit GI:2827888 from [Arabid   | 262823_at   | 0.8 |
| putative clathrin-coat assembly protein similar to gb L26291 clathrin-associated protein unc-101 from Caenorhabditis elegans and is a membe  | 262787_at   | 0.8 |
| hypothetical protein                                                                                                                         | 262741_at   | 0.8 |
| unknown protein ESTs gb T04357 and gb AA595092 come from this gene;supported by full-length cDNA: Ceres:114103.                              | 262710_at   | 0.8 |
| unknown protein                                                                                                                              | 262673_at   | 0.8 |
| unknown protein similar to elongation factor G SP:P34811 [Glycine max (Soybean)]; supported by cDNA: gi_14532623_gb_AY039936.1_              | 262645_at   | 0.8 |
| initiation factor 5A-4 identical to initiation factor 5A-4 GB:AAD39281 GI:5080771 from (Arabidopsis thaliana); supported by cDNA: gi_1240778 | 262615_at   | 0.8 |
| hypothetical protein Strong similarity to gb X95263 Periodic tryptophan protein 2 gene (PWP2) from Homo sapiens and contains 6 WD40, G-I     | 262584_at   | 0.8 |
| unknown protein Similar to gb AJ005073 Alix (ALG-2-interacting protein X) from Mus musculus. ESTs gb R90133, gb Z17944 and gb AA6054         | 262588_at   | 0.8 |
| NAM(no apical meristem) protein, putative similar to NAM protein GI:6066595 from (Petunia hybrida); supported by cDNA: gi_13605664_gb_       | 262514_at   | 0.8 |
| unknown protein Contains PF 00646 F-box domain. ESTs gb Z37267, gb R90412, gb Z37268 and gb T88189 come from this gene;supportec             | 262500_at   | 0.8 |
| unknown protein                                                                                                                              | 262430_s_at | 0.8 |
| putative U2 snRNP auxiliary factor Strong similarity to gb Y18349 U2 snRNP auxiliary factor, small subunit from Oryza sativa. ESTs gb AA58   | 262295_at   | 0.8 |
| Niemann-Pick C disease protein-like protein similar to Niemann-Pick C disease protein GB:AAB63982 GI:2276463 from [Homo sapiens]             | 262264_at   | 0.8 |
| deaminase, putative similar to cytidine/deoxycytidylate deaminase family protein GB:AAF73539 GI:8163170 from [Chlamydia muridarum]           | 262274_at   | 0.8 |
| unknown protein ; supported by cDNA: gi_15294195_gb_AF410289.1_AF410289                                                                      | 262175_at   | 0.8 |
| hypothetical protein contains similarity to far-red impaired response protein GI:5764395 from [Arabidopsis thaliana]                         | 262150_at   | 0.8 |
| hypothetical protein predicted by genscan+; supported by cDNA: gi_6520211_dbj_AB028226.1_AB028226                                            | 262078_at   | 0.8 |
| hypothetical protein predicted by genemark.hmm;supported by full-length cDNA: Ceres:3454.                                                    | 262095_at   | 0.8 |
| unknown protein                                                                                                                              | 262014_at   | 0.8 |
| proteasome regulatory subunit, putative similar to 26S proteasome regulatory complex subunit p30 GB:AAF08395 GI:6434966 from [Drosop         | 261955_at   | 0.8 |
| unknown protein                                                                                                                              | 261885_at   | 0.8 |
| CCR4-associated factor, putative\0CCR4-associated factor, putative similar to CCR4-ASSOCIATED FACTOR 1 GB:Q68089 from [Mus musc              | 261887_at   | 0.8 |
| unknown protein contains similarity to autocrine motility factor receptor GI:5931955 from [Homo sapiens]                                     | 261904_at   | 0.8 |
| unknown protein identical to unknown protein GB:AAC32929 GI:3395758 from [Arabidopsis thaliana];supported by full-length cDNA: Ceres:12      | 261745_at   | 0.8 |
| unknown protein ;supported by full-length cDNA: Ceres:33310.                                                                                 | 261677_at   | 0.8 |
| hypothetical protein contains similarity to ribulose-1,5 bisphosphate carboxylase GB:L34291 GI:508550 from [Pisum sativum]                   | 261654_at   | 0.8 |
| unknown protein ; supported by cDNA: gi_12083293_gb_AF332443.1_AF332443                                                                      | 261626_at   | 0.8 |
| RIBOSOMAL PROTEIN, putative similar to 30S RIBOSOMAL PROTEIN S1 GB:P46228 from [Synechococcus sp.]; supported by cDNA: gi_1                  | 261522_at   | 0.8 |
| Expressed protein ; supported by cDNA: gi_13877958_gb_AF370242.1_AF370242                                                                    | 261388_at   | 0.8 |
| hypothetical protein contains similarity to peroxisome membrane protein PEX2 GI:2623264 from [Mus musculus]; supported by full-length cDN    | 261348_at   | 0.8 |
| proton pump interactor, putative similar to GB:CAB43882 from [Arabidopsis thaliana]                                                          | 261365_at   | 0.8 |
| unknown protein                                                                                                                              | 261366_at   | 0.8 |
| unknown protein ;supported by full-length cDNA: Ceres:727.                                                                                   | 261336_at   | 0.8 |

|                                                                                                                                                   |             |     |
|---------------------------------------------------------------------------------------------------------------------------------------------------|-------------|-----|
| unknown protein ; supported by cDNA: gi_14596146_gb_AY042861.1_                                                                                   | 261337_at   | 0.8 |
| dihydroxyacetone kinase, putative similar to GB:U09771 from [Citrobacter freundii]                                                                | 261294_at   | 0.8 |
| hypothetical protein predicted by genemark.hmm                                                                                                    | 261301_at   | 0.8 |
| unknown protein ; supported by cDNA: gi_13605832_gb_AF367315.1_AF367315                                                                           | 261231_at   | 0.8 |
| flower pigmentation protein ATAN11 identical to GB:AAC18912 from [Arabidopsis thaliana] (Genes Dev. 11 (11), 1422-1434 (1997));supporte           | 261202_at   | 0.8 |
| TATA binding protein-associated factor, putative similar to GB:CAA74021 from [Arabidopsis thaliana]; supported by cDNA: gi_15293056_gb_           | 261126_at   | 0.8 |
| disease resistance protein, putative similar to GB:AAC15780 from [Lycopersicon pimpinellifolium] (Cell 84 (3), 451-459 (1996))                    | 261070_at   | 0.8 |
| developmentally regulated GTP-binding protein identical to GB:AAB67830 from [Arabidopsis thaliana] (Plant Mol. Biol. 39 (1), 75-82 (1999));       | 261036_at   | 0.8 |
| glyoxalase II isozyme, putative similar to glyoxalase II isozyme GB:AAC49865 GI:2570338 from [Arabidopsis thaliana];supported by full-length      | 260954_at   | 0.8 |
| scarecrow-like 1 identical to scarecrow-like 1 GB:AAF21043 GI:6644390 from [Arabidopsis thaliana];supported by full-length cDNA: Ceres:101        | 260878_at   | 0.8 |
| 19S proteosome subunit 9, putative similar to 19S proteosome subunit 9 GB:AAC34120 GI:3450889 from [Arabidopsis thaliana];supported by            | 260842_at   | 0.8 |
| unknown protein ; supported by cDNA: gi_16604612_gb_AY059751.1_                                                                                   | 260747_at   | 0.8 |
| myb-related DNA-binding protein, putative similar to GB:U67132 from [Petroselinum crispum] (Plant J. 11 (5), 1079-1093 (1997))                    | 260732_at   | 0.8 |
| unknown protein ; supported by cDNA: gi_15810124_gb_AY056127.1_                                                                                   | 260675_at   | 0.8 |
| hypothetical protein predicted by genemark.hmm                                                                                                    | 260681_at   | 0.8 |
| unknown protein ; supported by cDNA: gi_13605638_gb_AF361800.1_AF361800                                                                           | 260587_at   | 0.8 |
| RNA-binding protein, putative similar to GB:AAF29078 from [Homo sapiens];supported by full-length cDNA: Ceres:10976.                              | 260487_at   | 0.8 |
| hypothetical protein ; supported by cDNA: gi_15292844_gb_AY050856.1_                                                                              | 260489_at   | 0.8 |
| phosphatidylinositol-4-phosphate 5-kinase isolog                                                                                                  | 260466_at   | 0.8 |
| putative alpha-amylase similar to alpha-amylase GB:AAA91884 [Solanum tuberosum]; supported by cDNA: gi_15215737_gb_AY050398.1_                    | 260412_at   | 0.8 |
| unknown protein                                                                                                                                   | 260373_at   | 0.8 |
| unknown protein similar to hypothetical proteins GB:AAD39276 [Arabidopsis thaliana], GB:CAB53491 [Oryza sativa];supported by full-length          | 260227_at   | 0.8 |
| putative lipoxigenase similar to 13-lipoxygenase GB:CAA65269 [Solanum tuberosum]                                                                  | 260190_at   | 0.8 |
| putative G protein-coupled receptor similar to G protein-coupled receptor 69A GB:NP_006046 from [Homo sapiens]                                    | 260145_at   | 0.8 |
| unknown protein ;supported by full-length cDNA: Ceres:269548.                                                                                     | 260137_at   | 0.8 |
| hypothetical protein predicted by genefinder;supported by full-length cDNA: Ceres:38940.                                                          | 260096_at   | 0.8 |
| DNA-directed RNA polymerase subunit, putative similar to GI:6723961 from [Schizosaccharomyces pombe]                                              | 260049_at   | 0.8 |
| putative nuclear matrix constituent protein 1 (NMCP1) similar to nuclear matrix constituent protein 1 (NMCP1) GB:BAA20407 [Daucus carota]         | 260031_at   | 0.8 |
| putative DNA-binding protein contains Pfam profile: PF01388 ARID DNA binding domain                                                               | 259967_at   | 0.8 |
| hypothetical protein ; supported by full-length cDNA: Ceres:147838.                                                                               | 259976_at   | 0.8 |
| putative RNA-binding protein contains Pfam profile: PF00076 RNA recognition motif. (a.k.a. RRM, RBD, or RNP cDNA); supported by cDN/              | 259984_at   | 0.8 |
| putative P-type transporting ATPase similar to ATPase II GB:AAD34706 [Homo sapiens]                                                               | 259910_at   | 0.8 |
| putative translation initiation factor IF-2 similar to translation initiation factor IF-2 GB:P39730 [Saccharomyces cerevisiae]                    | 259872_at   | 0.8 |
| putative phorbol ester / diacylglycerol binding protein Pfam HMM hit: Phorbol esters / diacylglycerol binding domain                              | 259673_at   | 0.8 |
| protein kinase, putative similar to protein kinase GI:2852447 from (Arabidopsis thaliana)                                                         | 259541_at   | 0.8 |
| Expressed protein ; supported by full-length cDNA: Ceres: 20443.                                                                                  | 259542_at   | 0.8 |
| unknown protein ; supported by cDNA: gi_14423507_gb_AF386991.1_AF386991                                                                           | 259500_at   | 0.8 |
| protein serine/threonine kinase, putative similar to protein serine/threonine kinase GI:7248457 from [Lophopyrum elongatum]; supported by c       | 259437_at   | 0.8 |
| GTP-binding protein(RAB11D), putative similar to RAB11D GI:1370148 from [Lotus japonicus]; supported by cDNA: gi_12083263_gb_AF332                | 259395_at   | 0.8 |
| protein phosphatase 2A regulatory subunit, putative similar to protein phosphatase 2A regulatory subunit GI:683502 from [Arabidopsis thalial      | 259407_at   | 0.8 |
| unknown protein ;supported by full-length cDNA: Ceres:7124.                                                                                       | 259306_at   | 0.8 |
| Expressed protein ; supported by cDNA: gi_15081629_gb_AY048207.1_                                                                                 | 259310_s_at | 0.8 |
| 26S proteasome AAA-ATPase subunit RPT5a identical to GB:AAF22525 from [Arabidopsis thaliana]; supported by cDNA: gi_5669046_gb_Af                 | 259114_at   | 0.8 |
| unknown protein similar to unknown protein GB:BAA24863 [Homo sapiens], unknown protein GB:BAA20831 [Homo sapiens], unknown prote                  | 259118_at   | 0.8 |
| unknown protein similar to hypothetical protein GB:BAA29429 [Pyrococcus horikoshii];supported by full-length cDNA: Ceres:100279.                  | 259053_at   | 0.8 |
| hypothetical protein similar to Ku70-binding protein GB:AAD31085 [Homo sapiens]; supported by cDNA: gi_13877934_gb_AF370230.1_AF37                | 259056_at   | 0.8 |
| hypothetical protein                                                                                                                              | 259059_at   | 0.8 |
| putative GTP-binding protein similar to GTP-binding protein GB:BAA02108 [Pisum sativum], HMM hit: Ras family (contains ATP/GTP binding            | 259061_at   | 0.8 |
| unknown protein predicted by genscan; est match;supported by full-length cDNA: Ceres:3820.                                                        | 259038_at   | 0.8 |
| unknown protein similar to unknown proteins GB:AAD24625 [Arabidopsis thaliana], GB:AAC73026 [Arabidopsis thaliana]                                | 258933_at   | 0.8 |
| hypothetical protein similar to symbiosis related proteins: GB:AAB53650 [Laccaria bicolor], GB:P87068 [Laccaria bicolor];supported by full-ler    | 258880_at   | 0.8 |
| putative helicase similar to C-terminal half of transcription-repair coupling factor (TRCF) GB:Q55750 [Synechocystis PCC6803]; contains Pfar      | 258861_at   | 0.8 |
| putative 26S proteasome regulatory subunit                                                                                                        | 258871_at   | 0.8 |
| unknown protein ;supported by full-length cDNA: Ceres:320.                                                                                        | 258771_at   | 0.8 |
| putative ubiquitin carboxyl-terminal hydrolase similar to ubiquitin carboxyl-terminal hydrolase GB:AAF01440 [Schizosaccharomyces pombe]           | 258780_at   | 0.8 |
| unknown protein ; supported by full-length cDNA: Ceres: 28024.                                                                                    | 258747_at   | 0.8 |
| unknown protein similar to a region of DNAJ domain-containing protein MCJ GB:AAD38506; supported by full-length cDNA: Ceres: 5219.                | 258716_at   | 0.8 |
| unknown protein ; supported by cDNA: gi_15983478_gb_AF424614.1_AF424614                                                                           | 258647_at   | 0.8 |
| putative tyrosyl-tRNA synthetase similar to TYROSYL-TRNA SYNTHETASE GB:P04077 from [Bacillus caldotenax]                                          | 258475_at   | 0.8 |
| putative DNA binding protein identical to putative DNA binding protein GB:AAF27433 from [Arabidopsis thaliana]; supported by cDNA: gi_150         | 258324_at   | 0.8 |
| putative phospholipase D similar to phospholipase D1 GB:AAC78487 [Brassica oleracea], GB:Q38882 [Arabidopsis thaliana]; supported by c            | 258226_at   | 0.8 |
| hypothetical protein contains Pfam profile: PF01535 domain of unknown function (4 copies)                                                         | 258149_at   | 0.8 |
| hypothetical protein predicted by genemark                                                                                                        | 257963_at   | 0.8 |
| hypothetical protein predicted by genefinder;supported by full-length cDNA: Ceres:116381.                                                         | 257855_at   | 0.8 |
| light regulated protein, putative similar to light regulated protein precursor GB:Q03200 [Oryza sativa] (Plant Mol. Biol. 22 (1), 165-170 (1993)) | 257832_at   | 0.8 |
| unknown protein                                                                                                                                   | 257783_at   | 0.8 |
| RNA helicase, putative contains Pfam profiles: PF00636 RNase3 domain, PF00035 Double-stranded RNA binding motif; supported by cDNA                | 257678_at   | 0.8 |
| unknown protein contains Pfam profile:PF00806 Pumilio-family RNA binding domains; supported by cDNA: gi_15010673_gb_AY045638.1_                   | 257652_at   | 0.8 |
| unknown protein                                                                                                                                   | 257612_at   | 0.8 |
| glucose-6-phosphate 1-dehydrogenase, putative similar to glucose-6-phosphate 1-dehydrogenase GB:CAB52674 from [Arabidopsis thaliana               | 257144_at   | 0.8 |
| prohibitin, putative similar to prohibitin GB:AAC49691 from [Arabidopsis thaliana] (Plant Mol. Biol. (1997) 33 (4), 753-756);supported by full-le | 257149_at   | 0.8 |
| ATPase, putative similar to spastin protein GB:CAB60141 from [Homo sapiens] (Hum. Mol. Genet. (2000) 9, 637-644)                                  | 257046_at   | 0.8 |
| unknown protein                                                                                                                                   | 256940_at   | 0.8 |
| hypothetical protein predicted by genemark.hmm;supported by full-length cDNA: Ceres:103959.                                                       | 256851_at   | 0.8 |
| multispanning membrane protein, putative similar to transmembrane 9 superfamily member 2 GB:NP_004791 from [Homo sapiens] (Gene 21                | 256776_at   | 0.8 |
| hypothetical protein similar to putative pre-rRNA processing protein GB:AAF23213 GI:6671953 from [Arabidopsis thaliana]                           | 256661_at   | 0.8 |
| unknown protein similar to putative RING zinc finger protein GB:AAF15909 GI:6539239 from [Arabidopsis thaliana]                                   | 256611_at   | 0.8 |
| myosin identical to myosin GB:CAB61875 GI:6491702 [Arabidopsis thaliana]                                                                          | 256623_at   | 0.8 |
| hypothetical protein                                                                                                                              | 256579_at   | 0.8 |
| unknown protein                                                                                                                                   | 256530_at   | 0.8 |
| 55 kDa B regulatory subunit of phosphatase 2A nearly identical to 55 kDa B regulatory subunit of phosphatase 2A [Arabidopsis thaliana] GI:7       | 256187_at   | 0.8 |
| Ser Thr protein kinase, putative similar to Ser Thr protein kinase GI:2598067 from (Zea mays)                                                     | 256110_at   | 0.8 |
| hypothetical protein predicted by genscan+; supported by cDNA: gi_15810574_gb_AY056326.1_                                                         | 256069_at   | 0.8 |

|                                                                                                                                                   |             |     |
|---------------------------------------------------------------------------------------------------------------------------------------------------|-------------|-----|
| AT-hook DNA-binding protein (AHP1) almost identical to GB:CAA10857; supported by cDNA: gi_14326503_gb_AF385705.1_AF385705                         | 255792_at   | 0.8 |
| unknown protein ;supported by full-length cDNA: Ceres:121070.                                                                                     | 255766_at   | 0.8 |
| Expressed protein ; supported by full-length cDNA: Ceres: 36326.                                                                                  | 255670_at   | 0.8 |
| probable plasma membrane intrinsic protein 1c ; supported by cDNA: gi_2373400_dbj_D85192.1_D85192                                                 | 255674_at   | 0.8 |
| putative protein                                                                                                                                  | 255651_at   | 0.8 |
| predicted protein of unknown function                                                                                                             | 255544_at   | 0.8 |
| putative NifU-like metallocluster assembly factor similar to apricot NifU homolog partial CDS, GenBank accession number U95179; supportec         | 255556_at   | 0.8 |
| hypothetical protein similar to A. thaliana hypothetical protein from chromosome III, GenBank accession number 3068704                            | 255492_at   | 0.8 |
| putative WD-repeat protein similar to L. erythrorhizon LEC14B, GenBank accession number Q40153                                                    | 255468_at   | 0.8 |
| putative LRR receptor-like protein kinase similar to Z. mays leucine-rich repeat transmembrane protein kinase LRRTPK 1, GenBank accessi           | 255428_at   | 0.8 |
| hypothetical protein                                                                                                                              | 255171_at   | 0.8 |
| putative protein oxysterol-binding protein - Oryctolagus cuniculus (domestic rabbit),PIR2:A34404                                                  | 255151_at   | 0.8 |
| inositol 1,3,4-trisphosphate 5/6-kinase-like protein inositol 1,3,4-trisphosphate 5/6-kinase (EC 2.7.-.-) - Arabidopsis thaliana, PIR2:JC5401; si | 255132_at   | 0.8 |
| hypothetical protein ;supported by full-length cDNA: Ceres:41730.                                                                                 | 254721_at   | 0.8 |
| hypothetical protein                                                                                                                              | 254727_at   | 0.8 |
| putative protein WERBP-1 - Nicotiana tabacum, EMBL:AB017693;supported by full-length cDNA: Ceres:38327.                                           | 254682_at   | 0.8 |
| putative protein                                                                                                                                  | 254594_at   | 0.8 |
| putative protein heat shock protein dnaJ homolog, yeast, PIR2:A33618                                                                              | 254458_at   | 0.8 |
| putative protein ; supported by cDNA: gi_15028268_gb_AY046049.1_                                                                                  | 254376_at   | 0.8 |
| symbiosis-related like protein symbiosis-related protein, Laccaria bicolor,PATX:G2072023;supported by full-length cDNA: Ceres:14759.              | 254346_at   | 0.8 |
| hypothetical protein ;supported by full-length cDNA: Ceres:29391.                                                                                 | 254299_at   | 0.8 |
| putative protein chS-Rex-b - Gallus gallus (chicken),gb:L10333;supported by full-length cDNA: Ceres:39185.                                        | 254227_at   | 0.8 |
| tyrosine transaminase like protein tyrosine transaminase (EC 2.6.1.5) - rat, EMBL:X02741; supported by cDNA: gi_15076852_gb_AF268090              | 254232_at   | 0.8 |
| putative protein similarity Human mRNA for KIAA0156 gen - Homo sapiens, PID:d1010577                                                              | 254147_at   | 0.8 |
| protein kinase (AFC2) ; supported by cDNA: gi_601788_gb_U16177.1_ATU16177                                                                         | 254131_at   | 0.8 |
| putative protein apoptosis gene MA3, Suberites domuncula, Y15421; supported by cDNA: gi_17063162_gb_AY062102.1_                                   | 254089_at   | 0.8 |
| putative protein cell death suppressor protein IIs1, Zea mays, T04133; supported by cDNA: gi_15810258_gb_AY056168.1_                              | 254021_at   | 0.8 |
| P-glycoprotein-2 (pgp2)                                                                                                                           | 254034_at   | 0.8 |
| Expressed protein ; supported by full-length cDNA: Ceres: 9546.                                                                                   | 254041_at   | 0.8 |
| putative protein ;supported by full-length cDNA: Ceres:15410.                                                                                     | 253992_at   | 0.8 |
| putative aspartate-tRNA ligase aspartate-tRNA ligase (EC 6.1.1.12) -Methanobacterium thermoautotrophicum, GB:AE000809                             | 253935_at   | 0.8 |
| aspartate-tRNA ligase - like protein aspartyl tRNA synthetase, Drosophila melanogaster, EMBL:AF113612                                             | 253561_at   | 0.8 |
| L-ascorbate peroxidase - like protein various L-ascorbate peroxidases                                                                             | 253477_at   | 0.8 |
| F-box protein family, ATFBL15 contains similarity to F-box protein FBL2 GI:6063090 from [Homo sapiens]                                            | 253369_at   | 0.8 |
| putative protein YHR077c (NMD2,IFS1) protein -Saccharomyces cerevisiae,PID:g555939; supported by cDNA: gi_14334747_gb_AY035047.                   | 253335_at   | 0.8 |
| putative protein                                                                                                                                  | 253349_at   | 0.8 |
| putative protein TEB4 protein, Homo sapiens, PID:G2331104                                                                                         | 253267_at   | 0.8 |
| putative protein hypothetical protein slr2121, Synechocystis sp., PIR2:S75497;supported by full-length cDNA: Ceres:8686.                          | 253273_at   | 0.8 |
| homeodomain - like protein several homeodomain transcription factors; supported by cDNA: gi_15081750_gb_AY048268.1_                               | 253131_at   | 0.8 |
| putative protein predicted protein A_TM017A05.4 Arabidopsis thalianaBAC TM017A05, PID:g2435512                                                    | 253109_at   | 0.8 |
| putative protein F35D11.3, Caenorhabditis elegans, PATX:G868225                                                                                   | 253081_at   | 0.8 |
| putative protein gene T10 protein - mouse, PIR2:S37488; supported by cDNA: gi_15451201_gb_AY054681.1_                                             | 252981_at   | 0.8 |
| putative protein Niemann-Pick C disease protein - Homo sapiens, PID:g2276463                                                                      | 252985_at   | 0.8 |
| putative protein ; supported by cDNA: gi_13878068_gb_AF370297.1_AF370297                                                                          | 252974_at   | 0.8 |
| 2-dehydro-3-deoxyphosphoheptonate aldolase ; supported by cDNA: gi_166687_gb_M74819.1_ATHDHS1                                                     | 252831_at   | 0.8 |
| amine oxidase -like protein amine oxidase, Canavalia lineata, EMBL:AF172681                                                                       | 252698_at   | 0.8 |
| putative histone deacetylase similar to maize nucleolar histone deacetylase (U82815); supported by cDNA: gi_11066134_gb_AF195545.1_Af             | 252625_at   | 0.8 |
| tDTP-glucose 4-6-dehydratases-like protein tDTP-glucose 4-6-dehydratases homolog - Arabidopsis thaliana,PIR:S58282;supported by full-l            | 252527_at   | 0.8 |
| GTPase activating -like protein GTPase activating protein gyp7, Yarrowia lipolytica, EMBL:YLGYP7                                                  | 252310_at   | 0.8 |
| putative protein putative protein - Drosophila melanogaster, EMBL:AF132172                                                                        | 252239_at   | 0.8 |
| protein kinase SPK-2 ;supported by full-length cDNA: Ceres:3988.                                                                                  | 252166_at   | 0.8 |
| putative protein                                                                                                                                  | 252185_at   | 0.8 |
| putative protein senescence-associated protein 12 - Hemerocallis hybrid cultivar, EMBL:AF082032; supported by cDNA: gi_15215687_gb_A'             | 252099_at   | 0.8 |
| putative protein NADH dehydrogenase subunit 1, Lymantria dispar albescens, EMBL:AF075286;supported by full-length cDNA: Ceres:36750               | 252091_at   | 0.8 |
| mucin-like protein hemomucin, Drosophila melanogaster, EMBL:DM42014;supported by full-length cDNA: Ceres:38547.                                   | 252092_at   | 0.8 |
| putative protein putative protein T18N14_30 on this BAC                                                                                           | 252069_s_at | 0.8 |
| putative serine/threonine protein kinase Pto kinase interactor 1 -Lycopersicon esculentum,PID:g3668069; supported by cDNA: gi_16648894_           | 252042_at   | 0.8 |
| putative protein various predicted proteins, Arabidopsis thaliana                                                                                 | 252018_at   | 0.8 |
| TATA box binding protein (TBP) associated factor (TAF) -like protein TAF-172, Homo sapiens, EMBL:AF038362                                         | 251876_at   | 0.8 |
| putative protein                                                                                                                                  | 251892_at   | 0.8 |
| putative protein                                                                                                                                  | 251893_at   | 0.8 |
| Expressed protein ; supported by cDNA: gi_15451129_gb_AY054645.1_                                                                                 | 251848_at   | 0.8 |
| phosphatase - like protein DUAL SPECIFICITY PROTEIN PHOSPHATASE 5, Rattus norvegicus, SWISSPROT:DUS5_RAT; supported by c                          | 251786_at   | 0.8 |
| transcriptional coactivator - like protein hMBF1alpha, Homo sapiens, EMBL:AB002282;supported by full-length cDNA: Ceres:112835.                   | 251551_at   | 0.8 |
| putative protein phytochrome-associated protein 3 - Arabidopsis thaliana, EMBL:AF088280                                                           | 251497_at   | 0.8 |
| receptor-like protein kinase receptor-like protein kinase (RKS2) - Arabidopsis thaliana, EMBL:AF084036                                            | 251500_at   | 0.8 |
| putative protein chloroplast Cpn21 protein - Arabidopsis thaliana, EMBL:ATH010818;supported by full-length cDNA: Ceres:35721.                     | 251425_at   | 0.8 |
| CaLB protein                                                                                                                                      | 251351_s_at | 0.8 |
| putative protein several hypothetical proteins - Arabidopsis thaliana; supported by cDNA: gi_16648920_gb_AY059830.1_                              | 251314_at   | 0.8 |
| putative protein PrMC3, Pinus radiata, EMBL:AF110333                                                                                              | 251200_at   | 0.8 |
| hypothetical protein ; supported by full-length cDNA: Ceres: 4524.                                                                                | 251151_at   | 0.8 |
| putative protein SqdX protein, Synechococcus PCC7942, EMBL:SP45308; supported by cDNA: gi_15028316_gb_AY045961.1_                                 | 251143_at   | 0.8 |
| DP-2 transcription factor - like transcription factor DP-2, Homo sapiens, PIR:A57381                                                              | 251052_at   | 0.8 |
| putative protein thyroid receptor interacting protein 12, Homo sapiens, EMBL:D28476                                                               | 250988_at   | 0.8 |
| unknown protein ;supported by full-length cDNA: Ceres:150381.                                                                                     | 250792_at   | 0.8 |
| putative protein heparanase precursor, Homo sapiens, EMBL:AF155510                                                                                | 250604_at   | 0.8 |
| WD-repeat protein-like ; supported by cDNA: gi_15450909_gb_AY054535.1_                                                                            | 250539_at   | 0.8 |
| putative protein predicted proteins, Arabidopsis thaliana                                                                                         | 250486_at   | 0.8 |
| embryogenic callus protein - like embryogenic callus protein 181, Daucus carota, PIR:T14282;supported by full-length cDNA: Ceres:266771.          | 250494_at   | 0.8 |
| (3R)-hydroxymyristoyl-[acyl carrier protein] dehydratase -like protein beta-hydroxyacyl-ACP dehydratase precursor, Toxoplasma gondii, EMB         | 250470_at   | 0.8 |
| putative protein predicted proteins, Homo sapiens, Drosophila melanogaster, Caenorhabditis elegans                                                | 250377_at   | 0.8 |
| pre-mRNA splicing factor ATP-dependent RNA helicase -like protein PRE-MRNA SPLICING FACTOR ATP-DEPENDENT RNA HELICASE F                           | 250273_at   | 0.8 |
| acetolactate synthase-like protein                                                                                                                | 250111_at   | 0.8 |

|                                                                                                                                            |             |     |
|--------------------------------------------------------------------------------------------------------------------------------------------|-------------|-----|
| 2-hydroxyphytanoyl-CoA lyase-like protein                                                                                                  | 250094_at   | 0.8 |
| unknown protein ; supported by cDNA: gi_14334891_gb_AY035119.1_                                                                            | 250073_at   | 0.8 |
| Cu/Zn superoxide dismutase-like protein                                                                                                    | 250016_at   | 0.8 |
| putative protein contains similarity to transcription regulator; supported by cDNA: gi_13877644_gb_AF370523.1_AF370523                     | 250035_at   | 0.8 |
| putative protein nuclear FMRP interacting protein 1 NUFIP1, Homo sapiens, EMBL:AF159548                                                    | 250009_at   | 0.8 |
| hypothetical protein                                                                                                                       | 249990_at   | 0.8 |
| putative protein predicted proteins, Arabidopsis thaliana                                                                                  | 249974_at   | 0.8 |
| putative protein predicted proteins, Arabidopsis thaliana; supported by cDNA: gi_15983814_gb_AY056813.1_                                   | 249961_at   | 0.8 |
| histone deacetylase-like protein non-consensus AT donor splice site at exon 3, AC acceptor splice site at exon 4                           | 249901_at   | 0.8 |
| Expressed protein ; supported by cDNA: gi_15529239_gb_AY052244.1_                                                                          | 249839_at   | 0.8 |
| putative protein similar to unknown protein (gb AAD12714.1)                                                                                | 249845_at   | 0.8 |
| cation-transporting ATPase                                                                                                                 | 249846_at   | 0.8 |
| putative protein contains similarity to general transcription factor IIIC, polypeptide 5                                                   | 249735_at   | 0.8 |
| putative protein contains similarity to ribosomal protein 30S subunit; supported by cDNA: gi_13877770_gb_AF370148.1_AF370148               | 249742_at   | 0.8 |
| putative protein DNA-binding protein CCA1, Arabidopsis thaliana, PIR:T02684                                                                | 249606_at   | 0.8 |
| calmodulin 1 (CAM1) ; supported by cDNA: gi_15081766_gb_AY048276.1_                                                                        | 249582_at   | 0.8 |
| cysteine-tRNA ligase -like protein cysteine-tRNA ligase, Arabidopsis thaliana, PIR:T47747                                                  | 249537_at   | 0.8 |
| putative protein KIAA0409 protein, Homo sapiens, EMBL:AB007869                                                                             | 249360_at   | 0.8 |
| homeotic protein BEL1 homolog ; supported by cDNA: gi_15146192_gb_AY049237.1_                                                              | 249309_at   | 0.8 |
| putative protein similar to unknown protein (dbj BAA84809.1);supported by full-length cDNA: Ceres:27758.                                   | 249229_at   | 0.8 |
| maize crp1 protein-like                                                                                                                    | 249247_at   | 0.8 |
| COP8 (constitutive photomorphogenic) homolog ;supported by full-length cDNA: Ceres:31282.                                                  | 249175_at   | 0.8 |
| putative protein contains similarity to chloroplast nucleoid DNA-binding protein                                                           | 249130_at   | 0.8 |
| protein transport protein SEC23 ; supported by cDNA: gi_15810472_gb_AY056275.1_                                                            | 249106_at   | 0.8 |
| putative protein contains similarity to unknown protein (gb AAD17413.1);supported by full-length cDNA: Ceres:27195.                        | 249064_at   | 0.8 |
| berberine bridge enzyme-like protein                                                                                                       | 249047_at   | 0.8 |
| regulatory protein NPR1-like; transcription factor inhibitor I kappa B-like                                                                | 248981_at   | 0.8 |
| putative protein similar to unknown protein (pir T27174); supported by full-length cDNA: Ceres: 15222.                                     | 248884_at   | 0.8 |
| putative protein contains similarity to kinase                                                                                             | 248850_at   | 0.8 |
| putative protein contains similarity to salt-inducible protein                                                                             | 248854_at   | 0.8 |
| photoreceptor-interacting protein-like                                                                                                     | 248772_at   | 0.8 |
| putative protein contains similarity to transcription or splicing factor; supported by cDNA: gi_13877738_gb_AF370132.1_AF370132            | 248452_at   | 0.8 |
| unknown protein                                                                                                                            | 248453_at   | 0.8 |
| receptor protein kinase-like                                                                                                               | 248454_at   | 0.8 |
| aldo/keto reductase-like protein                                                                                                           | 248242_at   | 0.8 |
| putative protein similar to unknown protein (pir  C71422);supported by full-length cDNA: Ceres:819.                                        | 247988_at   | 0.8 |
| apospory-associated protein C                                                                                                              | 247929_at   | 0.8 |
| SNF1 related protein kinase-like protein ; supported by cDNA: gi_14334389_gb_AY034100.1_                                                   | 247867_at   | 0.8 |
| putative protein predicted proteins, Drosophila melanogaster and Arabidopsis thaliana                                                      | 247841_at   | 0.8 |
| beta-1,3 glucanase - like protein beta-1,3 glucanase, Populus alba x Populus tremula, EMBL:AF230109                                        | 247845_at   | 0.8 |
| putative protein various predicted proteins from different species;supported by full-length cDNA: Ceres:36809.                             | 247787_at   | 0.8 |
| putative protein                                                                                                                           | 247630_at   | 0.8 |
| putative protein predicted proteins, Arabidopsis thaliana;supported by full-length cDNA: Ceres:34861.                                      | 247496_at   | 0.8 |
| Mei2-like protein Mei2-like protein, Arabidopsis thaliana, EMBL:D86122; supported by cDNA: gi_2443328_dbj_D86122.1_D86122                  | 247506_at   | 0.8 |
| cdc2-like protein kinase-like protein supported by full-length cDNA: Ceres: 22817.                                                         | 247334_at   | 0.8 |
| beta-ureidopropionase                                                                                                                      | 247275_at   | 0.8 |
| putative protein similar to unknown protein (ref NP_014115.1);supported by full-length cDNA: Ceres:14033.                                  | 247249_at   | 0.8 |
| putative protein contains similarity to unknown protein (gb AAF44992.1); supported by cDNA: gi_15028246_gb_AY046038.1_                     | 247256_at   | 0.8 |
| putative protein contains similarity to unknown protein (gb AAF47170.1);supported by full-length cDNA: Ceres:13188.                        | 247209_at   | 0.8 |
| Expressed protein ; supported by cDNA: gi_15983431_gb_AF424590.1_AF424590                                                                  | 247178_at   | 0.8 |
| 3-hydroxyisobutyryl-coenzyme A hydrolase ; supported by cDNA: gi_8572759_gb_AF276301.1_AF276301                                            | 247117_at   | 0.8 |
| SAR DNA-binding protein - like SAR DNA-binding protein-1, garden pea, PIR:T06377                                                           | 246809_s_at | 0.8 |
| replication factor C - like replication factor C 38K chain, Homo sapiens, PIR:T09573                                                       | 246738_at   | 0.8 |
| putative protein YTM1 - Homo sapiens, EMBL:AF242546                                                                                        | 246559_at   | 0.8 |
| ubiquitin-fusion degradation protein-like ubiquitin-fusion degradation protein - Homo sapiens, EMBL:AF043117; supported by cDNA: gi_1521   | 246541_at   | 0.8 |
| putative protein                                                                                                                           | 246245_at   | 0.8 |
| RNA-binding like protein non-consensus TA donor splice site at exon 6; supported by cDNA: gi_15081786_gb_AY048286.1_                       | 246207_at   | 0.8 |
| step II splicing factor - like protein ; supported by cDNA: gi_15912280_gb_AY056418.1_                                                     | 246221_at   | 0.8 |
| ABI3-interacting protein 2 ;supported by full-length cDNA: Ceres:30983.                                                                    | 246189_at   | 0.8 |
| putative protein predicted protein, Oryza sativa; supported by cDNA: gi_15081722_gb_AY048254.1_                                            | 246160_at   | 0.8 |
| subtilisin-like protein subtilisin/kexin isozyme SKI-1 precursor - Rattus norvegicus, EMBL:AF094821                                        | 245960_at   | 0.8 |
| unknown protein similar to unknown protein GB:AAC36170 GI:3608137 from [Arabidopsis thaliana]; supported by cDNA: gi_11044956_emb_         | 245796_at   | 0.8 |
| S-ribonuclease binding protein SBP1 , putative similar to S-ribonuclease binding protein SBP1 GI:6760451 from [Petunia hybrida]; supported | 245781_at   | 0.8 |
| aldehyde dehydrogenase, putative similar to aldehyde dehydrogenase GI:2351120 from [Synechococcus PCC7942];supported by full-length        | 245742_at   | 0.8 |
| unknown protein                                                                                                                            | 245687_at   | 0.8 |
| unknown protein similar to putative Tub family protein GI:3738302 from [Arabidopsis thaliana]                                              | 245633_at   | 0.8 |
| hypothetical protein                                                                                                                       | 245618_at   | 0.8 |
| RNA polymerase II fifth largest subunit like protein                                                                                       | 245569_at   | 0.8 |
| hypothetical protein                                                                                                                       | 245502_at   | 0.8 |
| hypothetical protein                                                                                                                       | 245430_at   | 0.8 |
| auxin-responsive protein IAA1 ;supported by full-length cDNA: Ceres:33860.                                                                 | 245397_at   | 0.8 |
| indole-3-acetate beta-glucosyltransferase like protein ;supported by full-length cDNA: Ceres:35383.                                        | 245352_at   | 0.8 |
| Expressed protein ; supported by cDNA: gi_14334421_gb_AY034902.1_                                                                          | 245280_at   | 0.8 |
| phytoene dehydrogenase precursor (phytoene desaturase) ; supported by cDNA: gi_14532765_gb_AY040007.1_                                     | 245284_at   | 0.8 |
| hypothetical protein ; supported by cDNA: gi_15450995_gb_AY054578.1_                                                                       | 245295_at   | 0.8 |
| syntaxin ; supported by cDNA: gi_2149379_gb_U85036.1_ATU85036                                                                              | 245278_at   | 0.8 |
| F12A21.17 similar to signal recognition particle 72kD gi 5902124                                                                           | 245187_s_at | 0.8 |
| F12A21.19 unknown protein; similar to ESTs gb AI996033.1, and dbj AV563431.1                                                               | 245188_at   | 0.8 |
| unknown protein                                                                                                                            | 245131_s_at | 0.8 |
| putative TGACG-sequence-specific bZIP DNA-binding protein                                                                                  | 245092_at   | 0.8 |
| ubiquitin-specific protease 5 (UBP5), putative similar to GI:6648604; supported by cDNA: gi_6648603_gb_AF048705.1_AF048705                 | 245100_at   | 0.8 |
| putative cytochrome P450                                                                                                                   | 245075_at   | 0.8 |
| putative cyclin ;supported by full-length cDNA: Ceres:22595.                                                                               | 245043_at   | 0.8 |

|                                                                                                                                                        |             |     |
|--------------------------------------------------------------------------------------------------------------------------------------------------------|-------------|-----|
| ribosomal protein L22                                                                                                                                  | 244985_at   | 0.8 |
| hypothetical protein Contains similarity to hypothetical protein gb U95973 from A. thaliana                                                            | 257422_at   | 0.8 |
| hypothetical protein predicted by genscan+                                                                                                             | 258375_at   | 0.8 |
| unknown protein similar to far-red impaired response protein GB:AAD51282 [Arabidopsis thaliana]; supported by cDNA: gi_13430715_gb_AF                  | 256404_at   | 0.8 |
| putative protein polygalacturonase(EC 3.2.1.15) precursor - Erwinia carotovora.PID:g42330                                                              | 253326_at   | 0.8 |
| putative protein other predicted Arabidopsis thaliana proteins                                                                                         | 253037_at   | 0.8 |
| amine oxidase, putative similar to amine oxidase GB:AAD49420 GI:5733089 [Canavalia lineata]                                                            | 262667_at   | 0.7 |
| proteasome, 30 kda subunit (ec 3.4.99.46) (multicatalytic endopeptidase complex 30 kda subunit). >gp 166830 gb aaa16326.1  m98495 prot                 | 260503_at   | 0.7 |
| hypothetical protein predicted by genscan+                                                                                                             | 259884_at   | 0.7 |
| eukaryotic translation initiation factor 4E, putative similar to SP:O23252 from [Arabidopsis thaliana]                                                 | 259776_s_at | 0.7 |
| hypothetical protein predicted by genscan                                                                                                              | 259295_at   | 0.7 |
| hypothetical protein ; supported by cDNA: gi_14194138_gb_AF367275.1_AF367275                                                                           | 258553_at   | 0.7 |
| hypothetical protein predicted by genemark.hmm                                                                                                         | 258506_at   | 0.7 |
| unknown protein                                                                                                                                        | 255865_at   | 0.7 |
| putative protein several hypothetical proteins - Arabidopsis thaliana; supported by cDNA: gi_16604614_gb_AY059752.1_                                   | 251313_at   | 0.7 |
| unknown protein                                                                                                                                        | 249679_at   | 0.7 |
| putative protein                                                                                                                                       | 245718_at   | 0.7 |
| Arabidopsis thaliana /REF=U37281 /DEF=actin-2 mRNA, complete cds /LEN=1637 (-5, -M, -3 represent transcript regions 5 prime, Middle, aX-r2-At-Actin-3_ | 267539_at   | 0.7 |
| putative RING zinc finger protein ; supported by cDNA: gi_16648813_gb_AY058184.1_                                                                      | 267430_at   | 0.7 |
| unknown protein                                                                                                                                        | 267377_at   | 0.7 |
| beta-ketoacyl-CoA synthase (FIDDLEHEAD) identical to GB:AJ010713; contains a chalcone and stilbene synthase active site (PF00195); su                  | 267114_at   | 0.7 |
| Expressed protein ; supported by full-length cDNA: Ceres:40603.                                                                                        | 267072_at   | 0.7 |
| unknown protein                                                                                                                                        | 266889_at   | 0.7 |
| hypothetical protein predicted by genscan; supported by cDNA: gi_15146245_gb_AY049264.1_                                                               | 266798_at   | 0.7 |
| putative embryo-abundant protein contains a bZIP transcription factor basic domain signature (PDOC00036)                                               | 266758_at   | 0.7 |
| unknown protein                                                                                                                                        | 266608_at   | 0.7 |
| hypothetical protein predicted by genefinder and genscan; supported by cDNA: gi_15724241_gb_AF412061.1_AF412061                                        | 266515_at   | 0.7 |
| putative tubby protein                                                                                                                                 | 266238_at   | 0.7 |
| phosphoprotein phosphatase, type 1 catalytic subunit identical to GB:X64328; supported by cDNA: gi_166571_gb_M93408.1_ATH1PPHA                         | 266259_at   | 0.7 |
| unknown protein ;supported by full-length cDNA: Ceres:33700.                                                                                           | 266193_at   | 0.7 |
| unknown protein                                                                                                                                        | 266076_at   | 0.7 |
| ATP-dependent RNA helicase identical to GB:CAA09207, contains a DEAD/DEAH box family ATP-dependent helicas signature                                   | 266065_at   | 0.7 |
| phytochrome B Identical to GB:X17342                                                                                                                   | 266073_at   | 0.7 |
| putative signal recognition particle receptor beta subunit ;supported by full-length cDNA: Ceres:14084.                                                | 266022_at   | 0.7 |
| subtilisin-like serine protease, putative contains similarity to cucumis-like serine protease GI:3176874 from [Arabidopsis thaliana]                   | 265965_at   | 0.7 |
| putative glutamate/ornithine acetyltransferase ;supported by full-length cDNA: Ceres:121873.                                                           | 265942_at   | 0.7 |
| putative casein kinase I ;supported by full-length cDNA: Ceres:2312.                                                                                   | 265866_at   | 0.7 |
| unknown protein ;supported by full-length cDNA: Ceres:19157.                                                                                           | 265871_at   | 0.7 |
| unknown protein ;supported by full-length cDNA: Ceres:121540.                                                                                          | 265850_at   | 0.7 |
| putative DnaJ protein                                                                                                                                  | 265761_at   | 0.7 |
| putative stress protein                                                                                                                                | 265691_at   | 0.7 |
| unknown protein predicted by genscan                                                                                                                   | 265661_at   | 0.7 |
| putative protein kinase contains a protein kinase domain profile (PDOC00100); supported by cDNA: gi_15028152_gb_AY046026.1_                            | 265630_at   | 0.7 |
| unknown protein similar to ovarian tumor protein; supported by cDNA: gi_16604333_gb_AY058065.1_                                                        | 265595_at   | 0.7 |
| 26S proteasome subunit 4 ;supported by full-length cDNA: Ceres:36815.                                                                                  | 265521_at   | 0.7 |
| hypothetical protein predicted by genscan                                                                                                              | 265475_at   | 0.7 |
| ferredoxin--nitrite reductase ; supported by cDNA: gi_15010613_gb_AY045608.1_                                                                          | 265330_at   | 0.7 |
| unknown protein                                                                                                                                        | 265258_at   | 0.7 |
| hypothetical protein predicted by genefinder; supported by full-length cDNA: Ceres: 91902.                                                             | 265274_at   | 0.7 |
| putative RNA methyltransferase                                                                                                                         | 265244_at   | 0.7 |
| putative amine oxidase                                                                                                                                 | 265190_at   | 0.7 |
| unknown protein ; supported by cDNA: gi_15146299_gb_AY049291.1_                                                                                        | 265122_at   | 0.7 |
| similar to flavin-binding monooxygenase-like protein (Z71258); similar to ESTs gb R30018 and gb H36886 similar to flavin-containing monoox             | 265074_at   | 0.7 |
| hypothetical protein ; supported by cDNA: gi_14334789_gb_AY035068.1_                                                                                   | 265060_at   | 0.7 |
| HD-Zip protein, putative similar to HD-Zip protein GI:2145356 from [Arabidopsis thaliana]; supported by cDNA: gi_16974580_gb_AY060556.1_               | 264875_at   | 0.7 |
| putative glucanase                                                                                                                                     | 264789_at   | 0.7 |
| putative glycine-rich, zinc-finger DNA-binding protein genomic copy of EST T76328 cold-shock signature from position 22 to 41 [YGFITPDDI               | 264696_at   | 0.7 |
| unknown protein                                                                                                                                        | 264689_at   | 0.7 |
| hypothetical protein predicted by genscan                                                                                                              | 264607_at   | 0.7 |
| putative K+ channel, beta subunit similar to GB:AAA87294;supported by full-length cDNA: Ceres:23300.                                                   | 264608_at   | 0.7 |
| putative acetyl-CoA acyltransferase Strong similarity to Cucumis acetyl-CoA acyltransferase (gb D70895);supported by full-length cDNA: Cere            | 264622_at   | 0.7 |
| putative vacuolar sorting protein 35                                                                                                                   | 264471_at   | 0.7 |
| hypothetical protein predicted by genemark.hmm                                                                                                         | 264336_at   | 0.7 |
| hypothetical protein contains similarity to F-box protein Fbx7 GI:6164624 from [Homo sapiens]                                                          | 264322_at   | 0.7 |
| unknown protein Contains similarity to tetratricopeptide repeat protein gb U46571 from home sapiens. EST gb Z47802 and gb Z48402 come f                | 264299_s_at | 0.7 |
| hypothetical protein predicted by genemark.hmm                                                                                                         | 264257_at   | 0.7 |
| unknown protein                                                                                                                                        | 264204_at   | 0.7 |
| putative sucrose transport protein, SUC2 strong similarity to GB:S38196 sucrose transport protein SUC2 from [Arabidopsis thaliana];supporte            | 264210_at   | 0.7 |
| putative myb-related transcription factor Similar to myb-related transcription factor (THM27) gb X95296 from Solanum lycopersicum. ESTs gt             | 264165_at   | 0.7 |
| hypothetical protein contains similarity to toluene tolerance protein Ttg2A GI:4336798 from [Pseudomonas putida]; supported by cDNA: gi_13             | 264128_at   | 0.7 |
| unknown protein                                                                                                                                        | 264099_at   | 0.7 |
| replicase, putative similar to replicase GI:166841 from [Arabidopsis thaliana]; supported by cDNA: gi_15292902_gb_AY050885.1_                          | 264101_at   | 0.7 |
| unknown protein similar to putative CREB-binding protein GI:7025854 from [Arabidopsis thaliana]; supported by cDNA: gi_12597460_gb_AF3                 | 264084_at   | 0.7 |
| putative kinesin light chain                                                                                                                           | 264031_at   | 0.7 |
| unknown protein                                                                                                                                        | 263936_at   | 0.7 |
| putative ATP-dependent RNA helicase A                                                                                                                  | 263866_at   | 0.7 |
| putative farnesylated protein ;supported by full-length cDNA: Ceres:19570.                                                                             | 263808_at   | 0.7 |
| hypothetical protein predicted by genscan; supported by full-length cDNA: Ceres: 38737.                                                                | 263809_at   | 0.7 |
| putative GDSL-motif lipase/hydrolase similar to APG proteins; pFAM domain PF00657;supported by full-length cDNA: Ceres:39762.                          | 263802_at   | 0.7 |
| unknown protein ;supported by full-length cDNA: Ceres:35274.                                                                                           | 263749_at   | 0.7 |
| putative phosphatidylinositol/phosphatidylcholine transfer protein                                                                                     | 263762_at   | 0.7 |
| putative kinesin heavy chain ; supported by cDNA: gi_14532683_gb_AY039966.1_                                                                           | 263666_at   | 0.7 |
| putative pre-mRNA splicing factor PRP19 similar to GB:AAB80652; supported by cDNA: gi_14532631_gb_AY039940.1_                                          |             |     |



putative 1-aminocyclopropane-1-carboxylate oxidase Similar to Arabidopsis 2A6 (gb)X83096). EST gb|T76913 comes from this gene; support 263668\_at 0.7

unknown protein predicted by genefinder 263643\_at 0.7

putative receptor-like protein kinase 263590\_at 0.7

hypothetical protein similar to hypothetical protein GB:AAC27412 263404\_s\_at 0.7

putative protein kinase contains a protein kinase domain profile (PDOC00100);supported by full-length cDNA: Ceres:13257. 263419\_at 0.7

En/Spm-like transposon protein related to En/Spm transposon family of maize 263352\_at 0.7

unknown protein similar to ribonuclease inhibitors; supported by cDNA: gi\_15810394\_gb\_AY056236.1\_ 263212\_at 0.7

hypothetical protein putative acetyl-CoA carboxylase (partial) dbj|BAA07012; similar to ESTs gb|AW144916.1, gb|AI993440.1, gb|T14234, gb 263192\_at 0.7

hypothetical protein predicted by genemark.hmm; supported by cDNA: gi\_16604353\_gb\_AY058075.1\_ 263162\_at 0.7

putative peroxisome assembly factor-2 Belongs to PF|00004 ATPases associated with various cellular activities 263170\_at 0.7

cytochrome P450, putative similar to cytochrome P450 Gl:4176420 from [Arabidopsis thaliana] 263120\_at 0.7

putative mitotic control protein dis3 ; supported by cDNA: gi\_15982744\_gb\_AY057479.1\_ 263077\_at 0.7

exonuclease, putative similar to 5-3' exonuclease Gl:1894792 from [Mus musculus]; supported by cDNA: gi\_11875625\_gb\_AF286718.1\_AF 262961\_at 0.7

hypothetical protein predicted by genemark.hmm 262859\_at 0.7

gamma-tocopherol methyltransferase almost identical to gamma-tocopherol methyltransferase Gl:4106538 from [Arabidopsis thaliana];suppor 262875\_at 0.7

nucleoporin, putative similar to nuclear pore complex protein (NUP155) SP:O75694 [Homo sapiens (Human)] 262890\_at 0.7

unknown protein Location of ESTs OAO242 5 end, gb|Z30466 and OAO242 3 end, gb|Z30467 262853\_at 0.7

unknown protein Location of ESTs 152C14T7 , gb|T88012, 173P7T7 , gb|H36502 and 107E18T7 , gb|T22775;supported by full-length cDNA 262803\_at 0.7

putative cytochrome P450 monooxygenase identical to gb|D78605 cytochrome P450 monooxygenase from Arabidopsis thaliana and is a me 262826\_at 0.7

putative ribulose-1,5 biphosphate carboxylase/oxygenase large subunit N-methyltransferase highly similar to ribulose-1,5 biphosphate cart 262648\_at 0.7

putative pattern formation protein EMB30 highly similar to GB:Q42510; supported by cDNA: gi\_1209630\_gb\_U36432.1\_ATU36432 262614\_at 0.7

4-hydroxyphenylpyruvate dioxygenase (HPD) identical to 4-hydroxyphenylpyruvate dioxygenase (HPD) SP:P93836 [Arabidopsis thaliana (Mo 262635\_at 0.7

oxidoreductase, putative contains Pfam profile: PF00671 Iron/Ascorbate oxidoreductase family; supported by cDNA: gi\_13878118\_gb\_AF37( 262638\_at 0.7

ubiquitin-specific protease 15 (UBP15) almost identical to ubiquitin-specific protease 15 Gl:11993475 [Arabidopsis thaliana], 7 amino acid dif 262523\_at 0.7

unknown protein Contains similarity to gb|AJ000644 SPOP (speckle-type POZ protein) from Homo sapiens and contains a PF|00651 BTB/PC 262495\_at 0.7

serine/threonine kinase, putative similar to serine/threonine kinase GB:Y12530 Gl:2181187 from [Arabidopsis thaliana]; supported by cDNA: gi\_ 262458\_at 0.7

hypothetical protein predicted by genemark.hmm;supported by full-length cDNA: Ceres:230. 262397\_at 0.7

alpha-xylosidase precursor identical to alpha-xylosidase precursor GB:AAD05539 Gl:4163997 from [Arabidopsis thaliana]; supported by cDN 262230\_at 0.7

leaf development protein Argonaute identical to GB:AAC18440 from (Arabidopsis thaliana); supported by cDNA: gi\_2149639\_gb\_U91995.1\_/\_ 262246\_at 0.7

GTPase, putative similar to GTPase Gl:1524359 from [Synechocystis PCC6803] 262189\_at 0.7

phosphoribosylanthranilate transferase, putative similar to phosphoribosylanthranilate transferase Gl:1396053 from [Pisum sativum] 261935\_at 0.7

chloroplast drought-induced stress protein, putative similar to chloroplast drought-induced stress protein Gl:2582821 from [Solanum tuberosu 261751\_at 0.7

hypothetical protein predicted by genemark.hmm 261628\_at 0.7

putative lipase similar to hypothetical protein GB:AAF24946 Gl:6693020 from [Arabidopsis thaliana];supported by full-length cDNA: Ceres:111 261646\_at 0.7

unknown protein ;supported by full-length cDNA: Ceres:8976. 261566\_at 0.7

unknown protein 261540\_at 0.7

unknown protein contains DNA-J domain; supported by cDNA: gi\_15028270\_gb\_AY046050.1\_ 261458\_at 0.7

unknown protein ;supported by full-length cDNA: Ceres:120232. 261413\_at 0.7

homeodomain transcription factor, putative similar to homeodomain transcription factor (AGL30) Gl:3461830 from [Arabidopsis thaliana] 261423\_at 0.7

hypothetical protein predicted by genemark.hmm 261383\_at 0.7

unknown protein ; supported by cDNA: gi\_15912328\_gb\_AY056442.1\_ 261354\_at 0.7

aminoacylase, putative similar to aminoacylase I Gl:1844 from [Sus scrofa] 261326\_s\_at 0.7

hypothetical protein contains similarity to nascent polypeptide associated complex alpha chain Gl:6752882 from [Pinus taeda];supported by fu 261189\_at 0.7

hypothetical protein predicted by genemark.hmm 261173\_at 0.7

unknown protein ; supported by full-length cDNA: Ceres: 13391. 261038\_at 0.7

hypothetical protein contains similarity to transcription factor TFIID GB:U57693 Gl:1373376 from (Homo sapiens); supported by cDNA: gi\_15 261041\_at 0.7

hypothetical protein similar to unknown protein GB:AAF32477 Gl:6957733 from [Arabidopsis thaliana] 261043\_at 0.7

flavonol 3-o-glucosyltransferase, putative similar to flavonol 3-o-glucosyltransferase GB:Q40287 from [Manihot esculenta] 261048\_at 0.7

hypothetical protein similar to Pto kinase interactor 1 GB:AAC61805 Gl:3668069 from [Lycopersicon esculentum] 260924\_at 0.7

hypothetical protein predicted by genscan+ 260663\_at 0.7

translation elongation factor EF-1 alpha identical to GB:AAB07881 from [Arabidopsis thaliana] (Mol. Gen. Genet. 219 (1-2), 106-112 (1989)) 260677\_at 0.7

putative SF16 protein (Helianthus annuus) 260610\_at 0.7

putative AP2 domain transcription factor pFAM domain (PF00847); supported by full-length cDNA: Ceres: 41462. 260498\_at 0.7

unknown protein 260375\_at 0.7

putative N-terminal acetyltransferase similar to N-TERMINAL ACETYLTRANSFERASE GB:P12945 from (Saccharomyces cerevisiae) 260282\_at 0.7

unknown protein contains zinc finger, C3HC4 type (RING finger) domain 260168\_at 0.7

ethylene-response protein, ETR1 identical to GB:P49333 from [Arabidopsis thaliana] (Science 262 (5133), 539-544 (1993)) 260133\_at 0.7

hypothetical protein C-term similar to C-term of apoptosis inhibitor GB:AAC70265 [Lymantria dispar nucleopolyhedrovirus]; supported by cDN 260042\_at 0.7

putative heat shock transcription factor contains Pfam profile: PF00447 HSF-type DNA-binding domain; N-terminal portion similar to heat sho 259992\_at 0.7

putative chlorophyll A-B binding protein similar to chlorophyll A-B binding protein GB:P12470 [Nicotiana glauca]; contains Pfam profile 259970\_at 0.7

zinc finger protein, putative similar to Gl:3170601 from [Zea mays] (Cell 93 (4), 593-603 (1998));supported by full-length cDNA: Ceres:40167. 259932\_at 0.7

putative exportin, tRNA (nuclear export receptor for tRNAs) similar to exportin, tRNA (nuclear export receptor for tRNAs) GB:6005954 [Homo 259919\_at 0.7

unknown protein ;supported by full-length cDNA: Ceres:9231. 259765\_at 0.7

putative aminotransferase similar to kynurenine aminotransferase GB:S48737 [Rattus norvegicus], similar to aspartate aminotransferase GB: 259710\_at 0.7

putative 20S proteasome beta subunit PBC2 identical to residues 14-204 of 20S proteasome beta subunit PBC2 GB:AAC32069 [Arabidopsis 259712\_at 0.7

unknown protein ;supported by full-length cDNA: Ceres:37735. 259475\_at 0.7

hypothetical protein contains similarity to hepatocellular carcinoma-associated antigen 59 Gl:7158847 from [Homo sapiens]; supported by cDI 259415\_at 0.7

hypothetical protein gene model predicted by genscan and genefinder; supported by cDNA: gi\_13430665\_gb\_AF360245.1\_AF360245 259330\_at 0.7

putative 3' exonuclease contains Pfam profile: PF01138 3' exonuclease family; supported by cDNA: gi\_13358209\_gb\_AF325018.2\_A 259227\_at 0.7

putative glycerol-3-phosphate dehydrogenase similar to glycerol-3-phosphate dehydrogenase GB:BAA08926 [Mus musculus] 259146\_at 0.7

unknown protein 259121\_at 0.7

unknown protein Pfam HMM hit: Regulator of chromosome condensation (RCC1) 259125\_at 0.7

putative protein kinase contains Pfam profile: Eukaryotic protein kinase domain 259074\_at 0.7

hypothetical protein similar to hypothetical protein GB:P40055 [Saccharomyces cerevisiae], Pfam HMM hit: WD domain, G-beta repeats 258965\_at 0.7

putative DNA gyrase subunit A similar to DNA gyrase A subunit GB:BAA10380 [Synechocystis sp] 258966\_at 0.7

unknown protein C-terminal portion similar to mannosyltransferase GB:BAA28328 [Escherichia coli];supported by full-length cDNA: Ceres:17 258917\_at 0.7

Expressed protein ; supported by full-length cDNA: Ceres: 9573. 258848\_at 0.7

unknown protein 258833\_at 0.7

putative RNA-binding protein similar putative nucleic acid binding protein GB:CAB39665 [Arabidopsis thaliana]; Pfam HMM hit: KH domain far 258790\_at 0.7

unknown protein ;supported by full-length cDNA: Ceres:269248. 258609\_at 0.7

putative DEAD/DEAH box helicase contains Pfam profile: PF00270 DEAD/DEAH box helicase; supported by cDNA: gi\_15081734\_gb\_AY048 258554\_at 0.7

putative stearyl-acyl carrier protein desaturase similar to stearyl-acyl carrier protein desaturase GB:CAA07349 from [Linum usitatissimum];s 258485\_at 0.7

putative RAD23 similar to RAD23 protein GB:CAB51544 from [Lycopersicon esculentum]; supported by cDNA: gi\_14517453\_gb\_AY039562.1 258499\_at 0.7

|                                                                                                                                                |             |     |
|------------------------------------------------------------------------------------------------------------------------------------------------|-------------|-----|
| Expressed protein ; supported by cDNA: gi_15081712_gb_AY048249.1_                                                                              | 258458_at   | 0.7 |
| unknown protein ;supported by full-length cDNA: Ceres:38468.                                                                                   | 258435_at   | 0.7 |
| hypothetical protein predicted by genscan+                                                                                                     | 258355_at   | 0.7 |
| unknown protein                                                                                                                                | 258316_at   | 0.7 |
| unknown protein ; supported by cDNA: gi_15293102_gb_AY050985.1_                                                                                | 258256_at   | 0.7 |
| unknown protein similar to serine/threonine kinase receptor associated protein GB:NP_035629 [Mus musculus], unr-interacting protein GB:N       | 258272_at   | 0.7 |
| unknown protein ; supported by cDNA: gi_13358213_gb_AF325024.2_AF325024                                                                        | 258223_at   | 0.7 |
| phosphoprotein phosphatase, putative similar to phosphoprotein phosphatase GB:AAB18613 from [Mus musculus]                                     | 258215_at   | 0.7 |
| Expressed protein ; supported by full-length cDNA: Ceres: 41430.                                                                               | 258153_at   | 0.7 |
| Expressed protein ; supported by cDNA: gi_15810370_gb_AY056224.1_                                                                              | 258124_at   | 0.7 |
| hypothetical protein predicted by genemark.hmm;supported by full-length cDNA: Ceres:25758.                                                     | 258104_at   | 0.7 |
| putative cytochrome P450 similar to GB:Q05047 from [Catharanthus roseus]; supported by cDNA: gi_15529168_gb_AY052208.1_                        | 258063_at   | 0.7 |
| putative tyrosine phosphatase similar to GB:AAF08382 from [Drosophila melanogaster]                                                            | 258007_at   | 0.7 |
| abscisic acid responsive elements-binding factor almost identical (one amino acid) to GB:AAF27182 from [Arabidopsis thaliana]; supported by    | 258026_at   | 0.7 |
| unknown protein similar to ER6 protein GB:AAD46412 [Lycopersicon esculentum]; contains Pfam profile: PF00582 universal stress protein fai      | 257892_at   | 0.7 |
| hypothetical protein contains Pfam profile: PF01535 domain of unknown function                                                                 | 257838_at   | 0.7 |
| RING zinc finger protein, putative contains Pfam profile: PF00097 zinc finger, C3HC4 type (RING finger)                                        | 257826_at   | 0.7 |
| transcriptional regulator protein, putative similar to ATAN11 GB:AAC18912 [Arabidopsis thaliana] (Genes Dev. 11 (11), 1422-1434 (1997)); c     | 257833_at   | 0.7 |
| PRT1 identical to GB:CAA11891 from [Arabidopsis thaliana] (Proc. Natl. Acad. Sci. U.S.A. (1998) 95(14), 7904-7908);supported by full-length    | 257598_at   | 0.7 |
| hypothetical protein                                                                                                                           | 257209_at   | 0.7 |
| hypothetical protein predicted by genscan+                                                                                                     | 257044_at   | 0.7 |
| hypothetical protein predicted by genemark.hmm                                                                                                 | 257000_at   | 0.7 |
| glycolate oxidase, putative similar to GB:999542 from [Spinacia oleracea] (J. Biol. Chem. 264 (6), 3624-3628 (1989)), contains Pfam profile: I | 257004_s_at | 0.7 |
| unknown protein                                                                                                                                | 256932_at   | 0.7 |
| hypothetical protein ; supported by cDNA: gi_15293218_gb_AY051043.1_                                                                           | 256881_at   | 0.7 |
| auxin-independent growth promoter, putative similar to GB:A44226 from [Nicotiana tabacum] (Science 258 (5086), 1350-1353 (1992))               | 256706_at   | 0.7 |
| ATP-dependent Clp protease proteolytic subunit (ClpP3) identical to ATP-dependent Clp protease (nClpP3) GI:5360591 (Arabidopsis thaliana)      | 256411_at   | 0.7 |
| unknown protein ; supported by full-length cDNA: Ceres: 38207.                                                                                 | 256353_at   | 0.7 |
| protein kinase, putative contains Pfam profile: PF00069 Eukaryotic protein kinase domain                                                       | 256291_at   | 0.7 |
| unknown protein                                                                                                                                | 256284_at   | 0.7 |
| ankyrin-like protein contains Pfam profile: PF00023 Ank repeat; supported by full-length cDNA: Ceres: 153785.                                  | 256233_at   | 0.7 |
| electron transport flavoprotein, putative similar to electron transport flavoprotein [Homo sapiens] GI:182251                                  | 256209_at   | 0.7 |
| hypothetical protein                                                                                                                           | 256210_at   | 0.7 |
| unknown protein                                                                                                                                | 256220_at   | 0.7 |
| unknown protein ; supported by cDNA: gi_16209716_gb_AY057619.1_                                                                                | 256161_at   | 0.7 |
| hypothetical protein predicted by genemark.hmm                                                                                                 | 256078_at   | 0.7 |
| unknown protein ; supported by cDNA: gi_15146333_gb_AY049308.1_                                                                                | 256034_at   | 0.7 |
| unknown protein ;supported by full-length cDNA: Ceres:38751.                                                                                   | 256017_at   | 0.7 |
| glycyl tRNA synthetase, putative similar to glycyl tRNA synthetase GI:577711 from [Homo sapiens];supported by full-length cDNA: Ceres:296      | 256000_at   | 0.7 |
| transcription factor identical to transcription factor GI:304113 from [Arabidopsis thaliana];supported by full-length cDNA: Ceres:33016.       | 255953_at   | 0.7 |
| unknown protein similar to putative prolyl 4-hydroxylase, alpha subunit GI:6598804 from [Arabidopsis thaliana];supported by full-length cDNA   | 255883_at   | 0.7 |
| hypothetical protein contains Pfam profile: PF01416 tRNA pseudouridine synthase; supported by cDNA: gi_14334543_gb_AY035176.1_                 | 255887_at   | 0.7 |
| hypothetical protein contains similarity to PF01535 PPR repeat; supported by cDNA: gi_15450346_gb_AY052274.1_                                  | 255888_at   | 0.7 |
| putative pseudouridine synthase                                                                                                                | 255864_at   | 0.7 |
| hypothetical protein predicted by genscan                                                                                                      | 255870_at   | 0.7 |
| putative proline-rich protein ;supported by full-length cDNA: Ceres:33482.                                                                     | 255704_at   | 0.7 |
| predicted protein of unknown function ; supported by cDNA: gi_15809916_gb_AY054226.1_                                                          | 255710_at   | 0.7 |
| putative RNA helicase similar to ATP-dependent RNA helicases                                                                                   | 255688_at   | 0.7 |
| predicted protein of unknown function ; supported by cDNA: gi_16648930_gb_AY059835.1_                                                          | 255638_at   | 0.7 |
| predicted protein of unknown function ; supported by cDNA: gi_15810532_gb_AY056305.1_                                                          | 255325_at   | 0.7 |
| U3 snoRNP-associated -like protein U3 snoRNP-associated 55-kDa protein, Homo sapiens, gb:NP_004695                                             | 255222_at   | 0.7 |
| putative protein hypothetical protein srr1391 - Synechocystis sp. (strain PCC 6803),PIR2:S75571; supported by cDNA: gi_14190426_gb_AF:         | 255131_at   | 0.7 |
| putative protein (fragment) glutamine-rich tetratricopeptide repeat (TPR) containing protein (SGT) - Rattus norvegicus,PID:e1285298            | 255133_at   | 0.7 |
| putative protein RNA helicase -Mus musculus,PIR2:I84741                                                                                        | 255053_at   | 0.7 |
| isoleucine-tRNA ligase - like protein isoleucine--tRNA ligase, Homo sapiens, PIR2:I59314                                                       | 255020_at   | 0.7 |
| putative protein conserved hypothetical protein yqeH -Bacillus subtilis,PIR2:D69951; supported by cDNA: gi_15293098_gb_AY050983.1_             | 254991_at   | 0.7 |
| predicted protein of unknown function                                                                                                          | 254936_at   | 0.7 |
| putative protein ; supported by full-length cDNA: Ceres: 93362.                                                                                | 254957_at   | 0.7 |
| putative protein single strand DNA-binding protein - Vibrio cholerae, PIR2:T01928                                                              | 254963_at   | 0.7 |
| putative protein Fly Fas-associated factor (FFAF), Drosophila melanogaster, AB013610; supported by cDNA: gi_14596000_gb_AY042788.1_            | 254891_at   | 0.7 |
| putative protein several hypothetical proteins - Arabidopsis thaliana                                                                          | 254800_at   | 0.7 |
| putative protein hypothetical protein sll1769 - Synechocystis sp,PID:d1018406;supported by full-length cDNA: Ceres:18082.                      | 254760_at   | 0.7 |
| hypothetical protein ; supported by full-length cDNA: Ceres: 38412.                                                                            | 254691_at   | 0.7 |
| putative protein ; supported by cDNA: gi_14190356_gb_AF378856.1_AF378856                                                                       | 254580_at   | 0.7 |
| potassium transporter-like protein putative potassium transporter AtKT2p & AtKT1p, Arabidopsis thaliana, Patchx:G2384669 & Patchx:G2384        | 254520_at   | 0.7 |
| putative protein retinoblastoma binding protein 2, Homo sapiens, PIR:178879                                                                    | 254464_at   | 0.7 |
| anthocyanidin synthase - like protein putative leucoanthocyanidin dioxygenase, Arabidopsis thaliana, PID:g1575699                              | 254283_s_at | 0.7 |
| putative protein                                                                                                                               | 254140_at   | 0.7 |
| argininosuccinate synthase -like protein argininosuccinate synthase, Aquifex aeolicus, PIR2:B70398                                             | 254134_at   | 0.7 |
| hypothetical protein ;supported by full-length cDNA: Ceres:149683.                                                                             | 254100_at   | 0.7 |
| putative protein several hypothetical proteins - Arabidopsis thaliana                                                                          | 254061_at   | 0.7 |
| putative protein                                                                                                                               | 253942_at   | 0.7 |
| protein phosphatase homolog (PPH1)                                                                                                             | 253834_at   | 0.7 |
| protein kinase ADK1-like protein protein kinase ADK1-Arabidopsis thaliana;supported by full-length cDNA: Ceres:113439.                         | 253770_at   | 0.7 |
| putative protein predicted protein, Arabidopsis thaliana                                                                                       | 253783_at   | 0.7 |
| protein kinase - like protein ADK1 protein kinase, Arabidopsis thaliana, PIR2:A55661                                                           | 253764_s_at | 0.7 |
| Expressed protein ;supported by cDNA: gi_15983772_gb_AY056792.1_                                                                               | 253758_at   | 0.7 |
| putative protein putative NADH oxidoreductase complex I subunit - Caenorhabditis elegans,PID:g5019819                                          | 253712_at   | 0.7 |
| putative protein, fragment prolidase - Suberites domuncula,PID:e1289868                                                                        | 253719_at   | 0.7 |
| nucleotide pyrophosphatase - like protein nucleotide pyrophosphatase homolog, Oryza sativa, gb:T03293; supported by cDNA: gi_13877570          | 253698_at   | 0.7 |
| mRNA cleavage factor subunit - like protein mRNA cleavage factor I 25 kDa subunit, Homo sapiens, AJ001810;supported by full-length cDN         | 253672_at   | 0.7 |
| putative protein heat shock protein 101 - Triticum aestivum,PID:g4558484                                                                       | 253614_at   | 0.7 |
| putative protein 2-acylglycerophosphoethanolamine acyltransferase - Aquifex aeolicus,PIR2:E70476                                               | 253624_at   | 0.7 |

|                                                                                                                                              |             |     |
|----------------------------------------------------------------------------------------------------------------------------------------------|-------------|-----|
| putative protein predicted protein, Arabidopsis thaliana;supported by full-length cDNA: Ceres:154912.                                        | 253636_at   | 0.7 |
| putative protein SP8 binding protein, Cucumis sativus, PIR2:JC6203                                                                           | 253603_at   | 0.7 |
| hypothetical protein                                                                                                                         | 253572_at   | 0.7 |
| putative protein LipB gene, Prochlorothrix hollandica, PID:G1399931; supported by cDNA: gi_15887051_dbj_AB072390.1_AB072390                  | 253553_at   | 0.7 |
| Expressed protein ; supported by full-length cDNA: Ceres: 40692.                                                                             | 253485_at   | 0.7 |
| enoyl-CoA hydratase - like protein enoyl-CoA hydratase, Prunus armeniaca, U93271                                                             | 253492_at   | 0.7 |
| putative protein gene C42D8.3, Caenorhabditis elegans, PID:G1293846                                                                          | 253469_at   | 0.7 |
| putative protein tom-1B protein, Gallus gallus                                                                                               | 253418_at   | 0.7 |
| hypothetical protein ; supported by cDNA: gi_15028324_gb_AY045965.1_                                                                         | 253391_at   | 0.7 |
| putative aldehyde dehydrogenase aldehyde dehydrogenase (NAD+), Rattus norvegicus, PIR2:A41028; supported by cDNA: gi_15451105_gt             | 253237_at   | 0.7 |
| putative squalene synthase non-consensus GC donor splice site at exon 3, squalene synthase 2 (SQS2), Arabidopsis thaliana; supported by      | 253206_at   | 0.7 |
| invertase - like protein mRNA, Lilium longiflorum, gb:D21823; supported by cDNA: gi_15215775_gb_AY050417.1_                                  | 253224_at   | 0.7 |
| putative protein various predicted proteins                                                                                                  | 253071_at   | 0.7 |
| glycosyltransferase like protein alpha-1,3-mannosyl-glycoprotein beta-1,2-N-acetylglucosaminyltransferase (EC 2.4.1.101) I - rat,PIR2:JC207  | 253035_at   | 0.7 |
| hypothetical protein                                                                                                                         | 252960_at   | 0.7 |
| beta-D-glucan exohydrolase - like protein beta-D-glucan exohydrolase, Nicotiana tabacum, TREMBL:AB017502_1                                   | 252445_at   | 0.7 |
| putative protein various predicted proteins, Arabidopsis thaliana                                                                            | 252355_at   | 0.7 |
| putative protein GTP-binding protein beta chain homolog, Nicotiana tabacum, PIR:T16970;supported by full-length cDNA: Ceres:33776.           | 252252_at   | 0.7 |
| putative protein various predicted proteins, Arabidopsis thaliana                                                                            | 252245_at   | 0.7 |
| putative protein transcribed gene of unknown function, Arabidopsis thaliana, EMBL:ATH132745                                                  | 252226_at   | 0.7 |
| F-box protein family, ATFL16 contains similarity to SKP1 interacting partner 2 Gi:10716949 from [Arabidopsis thaliana]                       | 252242_at   | 0.7 |
| putative protein UDP-glucose:(glucosyl) LPS alpha1,3-glucosyltransferase WaaO, E.coli, EMBL:AF019746                                         | 252179_at   | 0.7 |
| putative protein saposin precursor - Homo sapiens, PIR:SAHUP;supported by full-length cDNA: Ceres:93651.                                     | 252075_at   | 0.7 |
| plastid division protein FtsZ-like FtsZ protein, Gentiana lutea, EMBL:AF205859; supported by cDNA: gi_14488049_gb_AF384167.1_AF3841          | 252001_at   | 0.7 |
| serine protein kinase - like serine protein kinase SRPK1, Homo sapiens, PIR:S45337; supported by cDNA: gi_15010661_gb_AY045632.1_            | 252026_at   | 0.7 |
| putative protein zinc finger protein GCS1 - Saccharomyces cerevisiae, PIR:S47006                                                             | 251905_at   | 0.7 |
| putative protein hin1 protein, Nicotiana tabacum, PIR:T03265;supported by full-length cDNA: Ceres:1678.                                      | 251879_at   | 0.7 |
| SKP1 interacting partner 5 (SKIP5)                                                                                                           | 251867_at   | 0.7 |
| Expressed protein ; supported by full-length cDNA: Ceres: 102807.                                                                            | 251813_at   | 0.7 |
| P-glycoprotein - like P-glycoprotein (pmdr1), Solanum tuberosum, EMBL:U52079                                                                 | 251781_at   | 0.7 |
| putative protein neuronal glutamine transporter - Rattus norvegicus, EMBL:AF075704                                                           | 251722_at   | 0.7 |
| N2,N2-dimethylguanosine tRNA methyltransferases-like protein several N2,N2-dimethylguanosine tRNA methyltransferases                         | 251730_at   | 0.7 |
| putative protein leucine-rich receptor-like protein kinase - Malus domestica, EMBL:AF053127                                                  | 251714_at   | 0.7 |
| putative protein several hypothetical proteins - Arabidopsis thaliana                                                                        | 251525_at   | 0.7 |
| putative protein mitochondrial RNA splicing protein MRS2 - Saccharomyces cerevisiae, PIR:S62064; supported by cDNA: gi_16209701_gb_          | 251508_at   | 0.7 |
| putative protein weak homology with predicted proteins, Arabidopsis thaliana                                                                 | 251391_at   | 0.7 |
| putative protein carbonyl reductase (NADPH) - Rattus norvegicus, PIR:JC5285; supported by cDNA: gi_15028054_gb_AY045884.1_                   | 251309_at   | 0.7 |
| putative protein PGP237-11, Petunia x hybrida, EMBL:AF049930                                                                                 | 251198_at   | 0.7 |
| heat shock protein 40-like heat shock protein 40 - Mus musculus, EMBL:AB028272;supported by full-length cDNA: Ceres:114622.                  | 251089_at   | 0.7 |
| putative protein RING-H2 finger protein RHA3a - Arabidopsis thaliana, EMBL:AF078824                                                          | 251066_at   | 0.7 |
| importin alpha - like protein importin alpha, Oryza sativa, EMBL:AB006788                                                                    | 250977_at   | 0.7 |
| ma binding protein - like ma binding protein, Schizosaccharomyces pombe, PIR:T41166;supported by full-length cDNA: Ceres:3774.               | 250845_at   | 0.7 |
| disease resistance - like protein rpp8, Arabidopsis thaliana, EMBL:AF089711; supported by cDNA: gi_15292720_gb_AY050794.1_                   | 250829_at   | 0.7 |
| E2, ubiquitin-conjugating enzyme, putative contains similarity to ubiquitin conjugating enzyme;supported by full-length cDNA: Ceres:41386.   | 250814_at   | 0.7 |
| putative protein similar to unknown protein (pir T00468)                                                                                     | 250713_at   | 0.7 |
| putative protein similar to unknown protein (ref NP_055701.1);supported by full-length cDNA: Ceres:15229.                                    | 250703_at   | 0.7 |
| putative protein strong similarity to unknown protein (gb AAF23201.1); supported by cDNA: gi_15293220_gb_AY051044.1_                         | 250692_at   | 0.7 |
| putative protein p100 co-activator - Mus musculus, EMBL:AB021491                                                                             | 250626_at   | 0.7 |
| myc-like protein myc-like regulatory R gene product - Phyllostachys acuta, EMBL:U11448                                                       | 250569_at   | 0.7 |
| putative protein contains similarity to unknown protein (gb AAF72944.1)                                                                      | 250525_at   | 0.7 |
| ribosomal protein - like chloroplast ribosomal protein L17, Nicotiana tabacum, PIR:T01744;supported by full-length cDNA: Ceres:22697.        | 250495_at   | 0.7 |
| ACTIN 2/7 (sp P53492) ; supported by cDNA: gi_1049306_gb_U37281.1_ATU37281                                                                   | 250458_s_at | 0.7 |
| putative protein predicted protein, Arabidopsis thaliana                                                                                     | 250274_at   | 0.7 |
| putative protein mRNA, Moritella marina, EMBL:AB025342                                                                                       | 250275_at   | 0.7 |
| putative protein ribulose-1,5-bisphosphate carboxylase/oxygenase small subunit N-methyltransferase I, Spinacia oleracea chloroplast, pir:T01 | 250170_at   | 0.7 |
| early nodule-specific protein - like early nodule-specific protein, Medicago truncatula, EMBL:AF064775                                       | 250180_at   | 0.7 |
| cinnamoyl CoA reductase - like protein cinnamoyl CoA reductase, Populus tremuloides, EMBL:AF217958;supported by full-length cDNA: Cer        | 250149_at   | 0.7 |
| putative protein similar to unknown protein (pir T01798)                                                                                     | 250113_at   | 0.7 |
| unknown protein                                                                                                                              | 250084_at   | 0.7 |
| galactose-1-phosphate uridyl transferase-like protein ;supported by full-length cDNA: Ceres:34699.                                           | 250029_at   | 0.7 |
| putative protein predicted proteins, Arabidopsis thaliana                                                                                    | 250005_at   | 0.7 |
| FAR1 - like protein far-red impaired response protein (FAR1), Arabidopsis thaliana, EMBL:AF159587                                            | 249953_at   | 0.7 |
| putative protein similar to unknown protein (gb AAD55417.1)                                                                                  | 249723_at   | 0.7 |
| 40S ribosomal protein S3 ; supported by full-length cDNA: Ceres: 10394.                                                                      | 249700_at   | 0.7 |
| contains similarity to DnaJ protein                                                                                                          | 249616_s_at | 0.7 |
| 5-oxoprolinase -like protein 5-oxoprolinase (ATP-hydrolyzing) (EC 3.5.2.9) - rat, PIR:T42756                                                 | 249585_at   | 0.7 |
| v-SNARE AtVTI1a                                                                                                                              | 249453_at   | 0.7 |
| unknown protein                                                                                                                              | 249294_at   | 0.7 |
| putative protein strong similarity to unknown protein (pir T13026)                                                                           | 249303_at   | 0.7 |
| unknown protein ;supported by full-length cDNA: Ceres:1558.                                                                                  | 249204_at   | 0.7 |
| unknown protein                                                                                                                              | 249210_at   | 0.7 |
| squamosa promoter binding protein-like 2 (emb CAB56576.1)                                                                                    | 249144_at   | 0.7 |
| cyclin-dependent protein kinase-like protein ; supported by cDNA: gi_15983484_gb_AF424617.1_AF424617                                         | 249050_at   | 0.7 |
| disease resistance protein-like                                                                                                              | 248845_at   | 0.7 |
| xylulose kinase ; supported by cDNA: gi_15292818_gb_AY050843.1_                                                                              | 248591_at   | 0.7 |
| methionine S-methyltransferase (gb AAD49574.1) ; supported by cDNA: gi_5733428_gb_AF137380.1_AF137380                                        | 248576_at   | 0.7 |
| putative protein contains similarity to pyridoxamine 5-phosphate oxidase;supported by full-length cDNA: Ceres:6244.                          | 248560_at   | 0.7 |
| putative protein contains similarity to unknown protein (pir T05571)                                                                         | 248533_at   | 0.7 |
| putative protein strong similarity to unknown protein (gb AAC72128.1); supported by cDNA: gi_15810202_gb_AY056116.1_                         | 248553_at   | 0.7 |
| HCF106 (gb AAD32652.1) ; supported by cDNA: gi_4894913_gb_AF139188.1_AF139188                                                                | 248338_at   | 0.7 |
| putative protein similar to unknown protein (gb AAD38661.1); supported by cDNA: gi_13430647_gb_AF360236.1_AF360236                           | 248305_at   | 0.7 |
| unknown protein                                                                                                                              | 248293_at   | 0.7 |
| putative protein contains similarity to zinc finger protein                                                                                  | 248265_at   | 0.7 |

|                                                                                                                                                        |                    |     |
|--------------------------------------------------------------------------------------------------------------------------------------------------------|--------------------|-----|
| putative protein similar to unknown protein (gb AAB63610.1)                                                                                            | 248213_at          | 0.7 |
| putative protein similar to unknown protein (gb AAF16663.1)                                                                                            | 248142_at          | 0.7 |
| putative protein similar to unknown protein (pir T04913)                                                                                               | 248093_at          | 0.7 |
| pyruvate kinase ;supported by full-length cDNA: Ceres:31580.                                                                                           | 247989_at          | 0.7 |
| putative protein similar to unknown protein (gb AAD38255.1)                                                                                            | 247889_at          | 0.7 |
| elongin - like protein elongin C, Drosophila melanogaster, PIR:JC5794; supported by cDNA: gi_15028384_gb_AY045995.1_                                   | 247721_at          | 0.7 |
| 1-aminocyclopropane-1-carboxylate oxidase - like protein 1-aminocyclopropane-1-carboxylate oxidase kidney bean, PIR:T10818; supported                  | 247679_at          | 0.7 |
| replication protein A1 - like probable replication protein A1, Oryza sativa, EMBL:AF009179;supported by full-length cDNA: Ceres:40850.                 | 247608_at          | 0.7 |
| ribulose-5-phosphate-3-epimerase ; supported by cDNA: gi_15027996_gb_AY045855.1_                                                                       | 247523_at          | 0.7 |
| putative protein strong similarity to unknown protein (gb AAD55296.1)                                                                                  | 247429_at          | 0.7 |
| dehydrogenase ; supported by cDNA: gi_15383743_gb_AY039787.1_                                                                                          | 247436_at          | 0.7 |
| histone deacetylase ;supported by full-length cDNA: Ceres:5511.                                                                                        | 247371_at          | 0.7 |
| putative protein contains similarity to NAC-domain protein;supported by full-length cDNA: Ceres:6637.                                                  | 247351_at          | 0.7 |
| unknown protein                                                                                                                                        | 247300_at          | 0.7 |
| putative protein contains similarity to splicing factor                                                                                                | 247325_at          | 0.7 |
| beta-xylosidase                                                                                                                                        | 247266_at          | 0.7 |
| 50S ribosomal protein L17 ;supported by full-length cDNA: Ceres:2806.                                                                                  | 247247_at          | 0.7 |
| putative protein strong similarity to unknown protein (emb CAB89401.1); supported by cDNA: gi_14030730_gb_AF375456.1_AF375456                          | 247193_at          | 0.7 |
| NifS-like aminotransferase ; supported by cDNA: gi_15292880_gb_AY050874.1_                                                                             | 247164_at          | 0.7 |
| unknown protein                                                                                                                                        | 247112_at          | 0.7 |
| ATP-dependent RNA helicase-like ; supported by cDNA: gi_16649120_gb_AY059930.1_                                                                        | 247119_at          | 0.7 |
| protein phosphatase 2C-like protein                                                                                                                    | 247126_at          | 0.7 |
| GTP-binding protein-like                                                                                                                               | 247098_at          | 0.7 |
| putative protein contains similarity to ATP binding protein associated with cell differentiation;supported by full-length cDNA: Ceres:2489.            | 247075_at          | 0.7 |
| putative protein similar to unknown protein (pir T38383); supported by cDNA: gi_15810344_gb_AY056211.1_                                                | 247045_at          | 0.7 |
| cytochrome P450-like protein CYTOCHROME P450 71B1 - Thlaspi arvense, EMBL:L24438                                                                       | 246947_at          | 0.7 |
| endopeptidase - like protein O-sialoglycoprotein endopeptidase, Methanococcus jannaschii, pir:A64441;supported by full-length cDNA: Ceres:             | 246879_at          | 0.7 |
| putative protein various predicted proteins, Arabidopsis thaliana, Caenorhabditis elegans and Drosophila melanogaster; supported by cDNA:              | 246843_at          | 0.7 |
| putative protein predicted proteins, Arabidopsis thaliana                                                                                              | 246820_at          | 0.7 |
| putative protein predicted proteins, Arabidopsis thaliana;supported by full-length cDNA: Ceres:40501.                                                  | 246611_at          | 0.7 |
| cold and ABA inducible protein kin1 ;supported by full-length cDNA: Ceres:2270.                                                                        | 246481_s_at        | 0.7 |
| cellulose synthase catalytic subunit (IRX3) ; supported by cDNA: gi_4886755_gb_AF088917.1_AF088917                                                     | 246425_at          | 0.7 |
| glutaredoxin, putative similar to glutaredoxin Gl:1732424 from [Ricinus communis]                                                                      | 246384_at          | 0.7 |
| putative transmembrane protein G5p yeast Sac1 protein, PIR:A33622                                                                                      | 246300_at          | 0.7 |
| acyl-CoA dehydrogenase Mus musculus glutaryl-CoA dehydrogenase precursor encoded by GenBank Accession Number U18992;supported                          | 246304_at          | 0.7 |
| hydroxynitrile lyase like protein                                                                                                                      | 246272_at          | 0.7 |
| BEL.1-like homeobox 2 protein (BLH2) ; supported by cDNA: gi_15215856_gb_AY050459.1_                                                                   | 246209_at          | 0.7 |
| putative protein DIM1 protein, Homo sapiens, EMBL:AF023611; supported by full-length cDNA: Ceres: 12591.                                               | 246006_at          | 0.7 |
| putative protein ; supported by cDNA: gi_4103242_gb_AF022368.1_AF022368                                                                                | 245971_at          | 0.7 |
| HOMEBOX PROTEIN KNOTTED-1 LIKE 4 (KNAT4)                                                                                                               | 245901_at          | 0.7 |
| alkaline/neutral invertase, putative similar to alkaline/neutral invertase Gl:9758657 from [Arabidopsis thaliana]                                      | 245681_at          | 0.7 |
| putative protein                                                                                                                                       | 245422_at          | 0.7 |
| hypothetical protein                                                                                                                                   | 245374_at          | 0.7 |
| putative methionine aminopeptidase ;supported by full-length cDNA: Ceres:37621.                                                                        | 245144_at          | 0.7 |
| RNA polymerase beta subunit-1                                                                                                                          | 244998_at          | 0.7 |
| ribosomal protein S3                                                                                                                                   | 244984_at          | 0.7 |
| hypothetical protein                                                                                                                                   | 244958_at          | 0.7 |
| hypothetical protein                                                                                                                                   | 244959_s_at        | 0.7 |
| hypothetical protein                                                                                                                                   | 244927_at          | 0.7 |
| hypothetical protein                                                                                                                                   | 257325_at          | 0.7 |
| hypothetical protein predicted by genemark.hmm                                                                                                         | 257487_at          | 0.7 |
| unknown protein contains Pfam profile:PF00400 WD domain, G-beta repeat                                                                                 | 257553_at          | 0.7 |
| hypothetical protein similar to putative protein GB:CAB52443 [Arabidopsis thaliana]                                                                    | 259285_at          | 0.7 |
| hypothetical protein contains similarity to glucosidase I Gl:2344809 from [Homo sapiens]                                                               | 264228_at          | 0.6 |
| hypothetical protein predicted by genscan                                                                                                              | 263521_at          | 0.6 |
| putative RING zinc finger protein contains Pfam profile: PF00097 Zinc finger, C3HC4 type (RING finger);supported by full-length cDNA: Cere             | 262167_at          | 0.6 |
| protein serine/threonine phosphatase alpha, putative similar to protein serine/threonine phosphatase alpha GB:AAC69437 Gl:3811109 from [               | 261743_s_at        | 0.6 |
| unknown protein                                                                                                                                        | 261060_at          | 0.6 |
| transcription factor, putative similar to SP:O88060 from [Streptomyces coelicolor]                                                                     | 259929_at          | 0.6 |
| hypothetical protein                                                                                                                                   | 257189_at          | 0.6 |
| putative protein predicted gene T10G3.5, Caenorhabditis elegans, PATCHX:E308128; supported by cDNA: gi_16604600_gb_AY059745.1_                         | 253468_at          | 0.6 |
| putative protein various predicted proteins, Arabidopsis thaliana;supported by full-length cDNA: Ceres:13930.                                          | 251005_at          | 0.6 |
| putative protein similar to unknown protein (dbj BAA91806.1); supported by cDNA: gi_13877730_gb_AF370128.1_AF370128                                    | 249092_at          | 0.6 |
| putative protein strong similarity to unknown protein (dbj BAA93030.1)                                                                                 | 247142_at          | 0.6 |
| putative protein predicted proteins, Drosophila melanogaster, Caenorhabditis elegans and Arabidopsis thaliana                                          | 246750_at          | 0.6 |
| J04423 E coli bioD gene dethiobiotin synthetase (-5 and -3 represent transcript regions 5 prime and 3 prime respectively)                              | \\FFX-BioDn-5_     | 0.6 |
| X03453 Bacteriophage P1 cre recombinase protein (-5 and -3 represent transcript regions 5 prime and 3 prime respectively)                              | \\FFX-CreX-5_      | 0.6 |
| Escherichia coli /REF=J04423 /DEF=E coli bioC protein corresponding to nucleotides 4257-4573 of J04423 /LEN=777 (-5 and -3 represent tr                | \\X-r2-Ec-bioC-f   | 0.6 |
| Escherichia coli /REF=J04423 /DEF=E coli bioD gene dethiobiotin synthetase corresponding to nucleotides 5024-5244 of J04423 /LEN=676 (-X-r2-Ec-bioD-f  | \\X-r2-Ec-bioD-f   | 0.6 |
| Arabidopsis thaliana /REF=U37281 /DEF=actin-2 mRNA, complete cds /LEN=1637 (-5, -M, -3 represent transcript regions 5 prime, Middle, aX-r2-At-Actin-5, | \\X-r2-At-Actin-5, | 0.6 |
| Arabidopsis thaliana /REF=U37281 /DEF=actin-2 mRNA, complete cds /LEN=1637 (_5, _M, _3 represent transcript regions 5 prime, Middle, X-Athal-Actin_3   | \\X-Athal-Actin_3  | 0.6 |
| unknown protein similar to GP 522127 gnl PID e349073 Z35639 and GP 2224677 gnl PID d1021664 AB002366                                                   | 267609_at          | 0.6 |
| putative nitrate transporter                                                                                                                           | 267612_at          | 0.6 |
| putative protein kinase contains a protein kinase domain profile (PDOC00100)                                                                           | 267564_at          | 0.6 |
| Expressed protein ; supported by cDNA: gi_15010573_gb_AY045588.1_                                                                                      | 267371_at          | 0.6 |
| GDP dissociation inhibitor identical to GB:D83531;supported by full-length cDNA: Ceres:29536.                                                          | 267236_at          | 0.6 |
| putative GTP-binding protein (extra large) ; supported by cDNA: gi_15451169_gb_AY054665.1_                                                             | 267136_at          | 0.6 |
| unknown protein                                                                                                                                        | 266971_at          | 0.6 |
| hypothetical protein predicted by genefinder                                                                                                           | 266938_at          | 0.6 |
| putative pyruvate dehydrogenase E1 beta subunit ;supported by full-length cDNA: Ceres:38439.                                                           | 266904_at          | 0.6 |
| SKP1/ASK1-related, putative similar to glycoprotein FP21 SP:P52285 from [Dictyostelium discoideum]                                                     | 266922_s_at        | 0.6 |
| putative glucosyltransferase                                                                                                                           | 266869_at          | 0.6 |
| unknown protein identical to GB:AAC31827                                                                                                               | 266816_at          | 0.6 |

|                                                                                                                                                                     |             |     |
|---------------------------------------------------------------------------------------------------------------------------------------------------------------------|-------------|-----|
| Expressed protein ; supported by full-length cDNA: Ceres: 9670.                                                                                                     | 266641_at   | 0.6 |
| hypothetical protein predicted by genefinder; supported by cDNA: gi_14532491_gb_AY039870.1_                                                                         | 266536_at   | 0.6 |
| putative ligand-gated ion channel subunit ; supported by cDNA: gi_6644387_gb_AF210701.1_AF210701                                                                    | 266338_at   | 0.6 |
| putative tropinone reductase                                                                                                                                        | 266280_at   | 0.6 |
| putative tropinone reductase ;supported by full-length cDNA: Ceres:1637.                                                                                            | 266291_at   | 0.6 |
| glutathione S-transferase identical to GB:X89216;supported by full-length cDNA: Ceres:6528.                                                                         | 266299_at   | 0.6 |
| putative phloem-specific lectin                                                                                                                                     | 266235_at   | 0.6 |
| putative ABC transporter                                                                                                                                            | 266158_at   | 0.6 |
| hypothetical protein predicted by genscan                                                                                                                           | 266114_at   | 0.6 |
| protease inhibitor II ; supported by cDNA: gi_15293090_gb_AY050979.1_                                                                                               | 266118_at   | 0.6 |
| putative mitochondrial carrier protein                                                                                                                              | 266109_at   | 0.6 |
| putative protein kinase contains a protein kinase domain profile (PDOC00100); supported by cDNA: gi_14335115_gb_AY037237.1_                                         | 265772_at   | 0.6 |
| putative ABC1 protein identical to EGAD 110384 118464supported by full-length cDNA: Ceres:141861.                                                                   | 265721_at   | 0.6 |
| putative CCR4-associated factor ; supported by cDNA: gi_15293024_gb_AY050946.1_                                                                                     | 265676_at   | 0.6 |
| putative beta-1,3-glucanase ;supported by full-length cDNA: Ceres:1126.                                                                                             | 265648_at   | 0.6 |
| hypothetical protein predicted by genefinder; supported by full-length cDNA: Ceres: 32664.                                                                          | 265628_at   | 0.6 |
| unknown protein                                                                                                                                                     | 265583_at   | 0.6 |
| hypothetical protein ; supported by cDNA: gi_13442982_gb_AY026065.1_                                                                                                | 265483_at   | 0.6 |
| unknown protein predicted by genscan                                                                                                                                | 265495_at   | 0.6 |
| unknown protein ;supported by full-length cDNA: Ceres:250015.                                                                                                       | 265458_at   | 0.6 |
| putative Na <sup>+</sup> /H <sup>+</sup> antiporter                                                                                                                 | 265252_at   | 0.6 |
| putative transcription factor                                                                                                                                       | 265218_at   | 0.6 |
| hypothetical protein predicted by genscan;supported by full-length cDNA: Ceres:37455.                                                                               | 265192_at   | 0.6 |
| putative zinc finger protein similar to zinc finger protein, 207 GB:4508017 from [Homo sapiens], similar to ESTs gb N38677 and gb H77073;si                         | 265129_at   | 0.6 |
| unknown protein similar to ESTs gb R30049 and gb T46176;supported by full-length cDNA: Ceres:102343.                                                                | 265101_at   | 0.6 |
| T-complex chaperonin protein , epsilon subunit identical to GB:O04450, similar to ESTs gb R29812, emb Z38124, gb AA297087, gb R29812,                               | 265010_at   | 0.6 |
| unknown protein supported by cDNA: Ceres: 103034, cDNA may not be full-length in this case.; supported by cDNA: gi_15982865_gb_AY05                                 | 264990_at   | 0.6 |
| F-box protein family, AtFBX3 contains similarity to stamnia pistilloidea GI:4101570, the pea ortholog of Fim and UFO from [Pisum sativum];su                        | 264955_at   | 0.6 |
| receptor-like kinase, putative similar to somatic embryogenesis receptor-like kinase GI:2224910 from [Daucus carota]; supported by cDNA: g                          | 264930_at   | 0.6 |
| unknown protein ;supported by full-length cDNA: Ceres:99231.                                                                                                        | 264848_at   | 0.6 |
| unknown protein similar to beta-galactoside alpha-2,3-sialyltransferase (pir JJC5251)                                                                               | 264793_at   | 0.6 |
| unknown protein similar to ESTs gb T20593 and emb Z35049                                                                                                            | 264796_at   | 0.6 |
| unknown protein                                                                                                                                                     | 264698_at   | 0.6 |
| putative elongation factor similar to GB:AAC67357                                                                                                                   | 264664_at   | 0.6 |
| auxin-resistance protein AXR1 E1 ubiquitin-like activating enzyme; identical to GB:P42744; supported by cDNA: gi_15215701_gb_AY050379                               | 264585_at   | 0.6 |
| unknown protein Location of EST gb Z34586 and gb Z34166; supported by cDNA: gi_15529271_gb_AY052260.1_                                                              | 264509_at   | 0.6 |
| hypothetical protein predicted by genemark.hmm                                                                                                                      | 264475_s_at | 0.6 |
| unknown protein similar to daunorubicin C-13 (U77891); similar to oxidoreductase in MRPL44-MTF1 intergenic protein (sp Q05016 YM71_YE                               | 264468_at   | 0.6 |
| fumarylacetoacetate hydrolase-like protein similar to fumarylacetoacetate hydrolase, gb L41670 from Emericella nidulans                                             | 264396_at   | 0.6 |
| coatomer alpha subunit, putative similar to coatomer alpha subunit GI:4567286 from [Arabidopsis thaliana]                                                           | 264309_at   | 0.6 |
| vacuolar-type H <sup>+</sup> -translocating inorganic pyrophosphatase identical to vacuolar-type H <sup>+</sup> -translocating inorganic pyrophosphatase GI:6901678 | 264249_at   | 0.6 |
| unknown protein                                                                                                                                                     | 264218_at   | 0.6 |
| hypothetical protein predicted by genemark.hmm                                                                                                                      | 264236_at   | 0.6 |
| CRK1 protein, putative similar to CRK1 protein GI:7671528 from [Beta vulgaris]; supported by cDNA: gi_13877618_gb_AF370510.1_AF3705                                 | 264193_at   | 0.6 |
| hypothetical protein contains Pfam profile: PF01535 PPR repeat                                                                                                      | 264177_at   | 0.6 |
| Mago Nashi-like protein similar to Mago Nashi, Genbank Accession Number U03559;supported by full-length cDNA: Ceres:35733.                                          | 264152_at   | 0.6 |
| unknown protein                                                                                                                                                     | 264063_at   | 0.6 |
| MADS-box protein (AGL3) ; supported by cDNA: gi_1737494_gb_U81369.1_ATU81369                                                                                        | 264041_at   | 0.6 |
| putative shikimate kinase precursor                                                                                                                                 | 263897_at   | 0.6 |
| SKP1 interacting partner 6 (SKIP6), putative similar to SKP1 interacting partner 6 GI:10716957 from [Arabidopsis thaliana]                                          | 263898_at   | 0.6 |
| Expressed protein ; supported by cDNA: gi_15027870_gb_AY045792.1_                                                                                                   | 263763_at   | 0.6 |
| unknown protein ESTs gb T20589, gb T04648, gb AA597906, gb T04111, gb R84180, gb R65428, gb T44439, gb T76570, gb R90004, gb T4                                     | 263709_at   | 0.6 |
| hypothetical protein Similar to Babesia aldo-keto reductase (gb M93122                                                                                              | 263678_at   | 0.6 |
| unknown protein                                                                                                                                                     | 263613_at   | 0.6 |
| putative homeodomain transcription factor ; supported by cDNA: gi_15983780_gb_AY056796.1_                                                                           | 263557_at   | 0.6 |
| putative Rieske iron-sulfur protein ;supported by full-length cDNA: Ceres:29774.                                                                                    | 263533_at   | 0.6 |
| phosphoenolpyruvate carboxylase                                                                                                                                     | 263491_at   | 0.6 |
| putative glucosyltransferase ; supported by cDNA: gi_15810476_gb_AY056277.1_                                                                                        | 263477_at   | 0.6 |
| cyclophilin-like protein ;supported by full-length cDNA: Ceres:124189.                                                                                              | 263288_at   | 0.6 |
| putative GTP-binding protein Similar to WO8E3.3 gi 3880615 putative GTP-binding protein from C. elegans cosmid gb Z92773. EST gb AA59                               | 263224_at   | 0.6 |
| unknown protein                                                                                                                                                     | 263171_at   | 0.6 |
| unknown protein ;supported by full-length cDNA: Ceres:157730.                                                                                                       | 262982_at   | 0.6 |
| hypothetical protein ;supported by full-length cDNA: Ceres:30113.                                                                                                   | 262929_at   | 0.6 |
| pyruvate dehydrogenase e1 alpha subunit, putative similar to pyruvate dehydrogenase e1 alpha subunit GI:473168 from [Solanum tuberosum                              | 262908_at   | 0.6 |
| glutathione S-transferase, putative similar to similar to glutathione S-transferase GB:AAF29773 GI:6856103 from [Gossypium hirsutum]; supp                          | 262916_at   | 0.6 |
| putative protein predicted protein, Caenorhabditis elegans, AL033514                                                                                                | 262869_s_at | 0.6 |
| purple acid phosphatase, putative contains Pfam profile: PF02227 Purple acid phosphatase                                                                            | 262830_at   | 0.6 |
| unknown protein ; supported by cDNA: gi_16612297_gb_AF439842.1_AF439842                                                                                             | 262849_at   | 0.6 |
| lipase, putative contains Pfam profile: PF00657 Lipase/Acylhydrolase with GDSL-like motif                                                                           | 262736_at   | 0.6 |
| hypothetical protein                                                                                                                                                | 262738_at   | 0.6 |
| vacuolar sorting protein 35, putative similar to vacuolar sorting protein 35 GB:AAF02778 GI:6049847 [Homo sapiens]                                                  | 262695_at   | 0.6 |
| PPR-repeat protein contains multiple PPR repeats Pfam Profile: PF01535                                                                                              | 262690_at   | 0.6 |
| unknown protein ;supported by full-length cDNA: Ceres:153154.                                                                                                       | 262641_at   | 0.6 |
| unknown protein ESTs gb H37295 and gb R64895 come from this gene;supported by full-length cDNA: Ceres:13543.                                                        | 262592_at   | 0.6 |
| hypothetical protein similar to hypothetical protein GB:AAF24586 GI:6692121 from [Arabidopsis thaliana]                                                             | 262549_at   | 0.6 |
| hypothetical protein predicted by genscan+; supported by cDNA: gi_14517529_gb_AY039600.1_                                                                           | 262248_at   | 0.6 |
| unknown protein contains similarity to translation initiation factor eIF-2B GI:623032 from [Rattus norvegicus]                                                      | 262253_s_at | 0.6 |
| hypothetical protein predicted by genemark.hmm; supported by cDNA: gi_16209708_gb_AY057616.1_                                                                       | 262223_at   | 0.6 |
| dynammin-like protein similar to dynamin GB:AAA37324 GI:487857 from [Mus musculus]; supported by cDNA: gi_15146178_gb_AY049230.1_                                   | 262077_at   | 0.6 |
| hypothetical protein contains similarity to helicase-like protein NHL GI:6969265 from [Homo sapiens]                                                                | 262066_at   | 0.6 |
| putative DnaJ protein contains Pfam profile: PF00226 DnaJ, prokaryotic heat shock protein; similar to hypothetical protein GB:AAD55462 (Ar                          | 262053_at   | 0.6 |
| 10-formyltetrahydrofolate synthetase identical to 10-formyltetrahydrofolate synthetase (Arabidopsis thaliana) GI:5921663; supported by cDNA                         | 261864_s_at | 0.6 |
| DNA damage repair protein, putative similar to DNA damage repair protein GB:P42698 from [Arabidopsis thaliana]; supported by cDNA: gi_1                             | 261808_at   | 0.6 |

|                                                                                                                                                  |             |     |
|--------------------------------------------------------------------------------------------------------------------------------------------------|-------------|-----|
| prolyl endopeptidase, putative similar to prolyl endopeptidase GI:6561876 from [Mus musculus]                                                    | 261770_at   | 0.6 |
| hypothetical protein predicted by genemark.hmm                                                                                                   | 261632_at   | 0.6 |
| ADP-glucose pyrophosphorylase, putative similar to ADP-glucose pyrophosphorylase GB:X78900 GI:556623 from [Beta vulgaris]                        | 261642_at   | 0.6 |
| hypothetical protein predicted by genemark.hmm;supported by full-length cDNA: Ceres:2686.                                                        | 261610_at   | 0.6 |
| unknown protein                                                                                                                                  | 261469_at   | 0.6 |
| L-ascorbate peroxidase identical to GB:CAA42168 from [Arabidopsis thaliana] (Plant Mol. Biol. 18 (4), 691-701 (1992));supported by full-leng     | 261412_at   | 0.6 |
| unknown protein ; supported by cDNA: gi_15292702_gb_AY050785.1_                                                                                  | 261293_at   | 0.6 |
| unknown protein ;supported by full-length cDNA: Ceres:39874.                                                                                     | 261155_at   | 0.6 |
| transcription factor MYC7E, putative similar to transcription factor MYC7E GB:AAD15818 GI:4321762 from [Zea mays]                                | 261050_at   | 0.6 |
| hypothetical protein predicted by genemark.hmm                                                                                                   | 261053_at   | 0.6 |
| beta-glucosidase, putative similar to beta-glucosidase GB:L41869 GI:804655 from [Hordeum vulgare];supported by full-length cDNA: Ceres:1         | 261016_at   | 0.6 |
| unknown protein contains similarity to peptidyl-prolyl cis/trans isomerase GB:AAC62692 GI:3599386 from [Cenarchaeum symbiosum];supporti          | 261018_at   | 0.6 |
| hypothetical protein contains similarity to vacuolating cytotoxin (vacA) GI:6634155 from [Helicobacter pylori]                                   | 260938_at   | 0.6 |
| hypothetical protein predicted by genemark.hmm                                                                                                   | 260922_at   | 0.6 |
| hypothetical protein predicted by genemark.hmm                                                                                                   | 260899_at   | 0.6 |
| hypothetical protein contains similarity to transcriptional regulator protein GB:X68061 GI:57911 from [Mus musculus];supported by full-length    | 260894_at   | 0.6 |
| ER lumen protein retaining receptor identical to SP:P35402 from [Arabidopsis thaliana]                                                           | 260897_at   | 0.6 |
| histone H1, putative similar to histone H1-1 GB:CAA44312 GI:16314 from [Arabidopsis thaliana];supported by full-length cDNA: Ceres:24648         | 260830_at   | 0.6 |
| unknown protein                                                                                                                                  | 260718_at   | 0.6 |
| hypothetical protein predicted by genscan+                                                                                                       | 260641_at   | 0.6 |
| unknown protein                                                                                                                                  | 260596_at   | 0.6 |
| serine acetyltransferase identical to GB:CAA84371 from [Arabidopsis thaliana] (Eur. J. Biochem. 227 (1-2), 500-509 (1995)); supported by cD      | 260602_at   | 0.6 |
| Expressed protein ; supported by cDNA: gi_13605678_gb_AF361820.1_AF361820                                                                        | 260500_at   | 0.6 |
| hypothetical protein predicted by genefinder;supported by full-length cDNA: Ceres:40765.                                                         | 260479_at   | 0.6 |
| Ser/Thr kinase ;supported by full-length cDNA: Ceres:100245.                                                                                     | 260480_at   | 0.6 |
| hypothetical protein predicted by genefinder; supported by cDNA: gi_15450969_gb_AY054565.1_                                                      | 260413_at   | 0.6 |
| unknown protein ; supported by cDNA: gi_13937138_gb_AF372923.1_AF372923                                                                          | 260358_at   | 0.6 |
| hypothetical protein predicted by genscan+; supported by cDNA: gi_14335049_gb_AY037204.1_                                                        | 260310_at   | 0.6 |
| putative RING zinc finger protein contains Pfam profile: PF00097 zinc finger, C3HC4 type (RING finger)                                           | 260330_at   | 0.6 |
| hypothetical protein similar to putative protein GB:CAA18164 [Arabidopsis thaliana]; supported by cDNA: gi_13878144_gb_AF370335.1_AF3            | 260243_at   | 0.6 |
| unknown protein                                                                                                                                  | 260069_at   | 0.6 |
| unknown protein contains Pfam profile: PF00561 alpha/beta hydrolase fold; supported by cDNA: gi_16930504_gb_AF419606.1_AF419606                  | 260048_at   | 0.6 |
| hydrophilic protein, putative similar to GI:198573 from [Mus musculus] (Gene 107, 345-346 (1992))                                                | 260020_at   | 0.6 |
| hydroxypyruvate reductase (HPR) identical to hydroxypyruvate reductase (HPR) GB:D85339 [Arabidopsis thaliana] (Plant Cell Physiol 1997 A         | 260014_at   | 0.6 |
| hypothetical protein predicted by genscan+                                                                                                       | 259938_at   | 0.6 |
| putative ribophorin I (dolichyl-diphosphooligosaccharide-protein glycosyltransferase) similar to ribophorin I (dolichyl-diphosphooligosaccharide | 259883_at   | 0.6 |
| leucine-rich receptor-like protein kinase, putative similar to GI:3641252 from [Malus x domestica] (Plant Mol. Biol. 40 (6), 945-957 (1999))     | 259848_at   | 0.6 |
| Expressed protein ; supported by full-length cDNA: Ceres: 30602.                                                                                 | 259789_at   | 0.6 |
| putative replication factor C similar to replication factor C GB:P40937 [Homo sapiens]                                                           | 259732_at   | 0.6 |
| putative DNA-binding protein similarity to short region of heat shock transcription factors: GB:CAB10177, GB:AAC31792, GB:CAA16745, GB           | 259711_at   | 0.6 |
| unknown protein                                                                                                                                  | 259651_at   | 0.6 |
| hypothetical protein                                                                                                                             | 259633_at   | 0.6 |
| hypothetical protein                                                                                                                             | 259551_at   | 0.6 |
| hypothetical protein                                                                                                                             | 259564_at   | 0.6 |
| unknown protein similar to putative cis-Golgi SNARE protein GI:2583133 from [Arabidopsis thaliana]; supported by cDNA: gi_12083259_gb_A          | 259498_at   | 0.6 |
| unknown protein ; supported by cDNA: gi_15028126_gb_AY046013.1_                                                                                  | 259501_at   | 0.6 |
| unknown protein similar to putative MYB family transcription factor GI:4335752 from [Arabidopsis thaliana]                                       | 259423_at   | 0.6 |
| putative aminopeptidase similar to X-prolyl aminopeptidase GB:NP_006514 from [Homo sapiens]                                                      | 259296_at   | 0.6 |
| putative nodulin similar to nodulin GB:AAA91034 from [Medicago sativa];supported by full-length cDNA: Ceres:16718.                               | 259308_at   | 0.6 |
| putative porin similar to outer mitochondrial membrane porin (voltage-dependent anion-selective channel protein) (VDAC) (POM 34) GB:P420         | 259270_at   | 0.6 |
| putative polypyrimidine tract-binding protein similar to polypyrimidine tract-binding proteins from rat, mouse and human; supported by cDNA:     | 259280_at   | 0.6 |
| unknown protein est hit, predicted by genscan                                                                                                    | 259190_at   | 0.6 |
| unknown protein ;supported by full-length cDNA: Ceres:22512.                                                                                     | 259192_at   | 0.6 |
| putative auxin-independent growth promoter similar to auxin-independent growth promoter GB:A44226 [Nicotiana tabacum];supported by full-         | 259132_at   | 0.6 |
| unknown protein ;supported by full-length cDNA: Ceres:32811.                                                                                     | 259039_at   | 0.6 |
| putative D-ribulose-5-phosphate 3-epimerase similar to D-ribulose-5-phosphate 3-epimerase GB:AAF01048 [Oryza sativa]; contains non-cons          | 258999_at   | 0.6 |
| unknown protein contains Pfam profile: PF00498 Forkhead-associated (FHA) domain (putative nuclear protein)                                       | 258822_s_at | 0.6 |
| unknown protein similar to hypothetical protein KIAA0188 GB: Q14693 from [Homo sapiens]                                                          | 258721_at   | 0.6 |
| E2, ubiquitin-conjugating enzyme 11 (UBC11) identical to gi:12643427, SP:P35134;supported by full-length cDNA: Ceres:21455.                      | 258678_at   | 0.6 |
| hypothetical protein predicted by genscan+;supported by full-length cDNA: Ceres:34682.                                                           | 258640_at   | 0.6 |
| unknown protein contains Pfam profile: PF01965 ThiJ Pfpl family                                                                                  | 258622_at   | 0.6 |
| unknown protein                                                                                                                                  | 258478_at   | 0.6 |
| phospholipase D, putative similar to phospholipase D GB:BAA32278 from [Candida albicans]                                                         | 258430_at   | 0.6 |
| putative glycolate oxidase similar to glycolate oxidase GB:BAA03131 from [Cucurbita sp.]                                                         | 258359_s_at | 0.6 |
| unknown protein ; supported by cDNA: gi_13430465_gb_AF360145.1_AF360145                                                                          | 258259_s_at | 0.6 |
| unknown protein                                                                                                                                  | 258238_at   | 0.6 |
| Snf1-related protein kinase KIN11 (AKIN11) identical to protein kinase AKIN11 GI:1729444 [Arabidopsis thaliana]                                  | 258221_at   | 0.6 |
| unknown protein ; supported by cDNA: gi_13605520_gb_AF361586.1_AF361586                                                                          | 258165_at   | 0.6 |
| chaperonin subunit, putative similar to cytosolic chaperonin, delta-subunit GB:CAA09989 [Glycine max]; contains Pfam profile: PF00118 TCF        | 258152_at   | 0.6 |
| putative UDP-glucose glucosyltransferase similar to GB:Q40284 from [Manihot esculenta]                                                           | 257940_at   | 0.6 |
| hypothetical protein predicted by genscan+                                                                                                       | 257923_at   | 0.6 |
| putative protein peroxidase - Lycopersicon esculentum, PIR:S32768                                                                                | 257890_s_at | 0.6 |
| unknown protein contains Pfam profile: PF01535 domain of unknown function (2 copies)                                                             | 257827_at   | 0.6 |
| unknown protein ;supported by full-length cDNA: Ceres:120050.                                                                                    | 257770_at   | 0.6 |
| unknown protein C-term similar to phosphatidylcholine transfer protein GB:AAF08345 [Homo sapiens]; supported by cDNA: gi_15810256_gb_            | 257772_at   | 0.6 |
| RING zinc finger protein, putative contains Pfam profile: PF00097 zinc finger, C3HC4 type (RING finger); supported by cDNA: gi_14326492_         | 257215_at   | 0.6 |
| Expressed protein ; supported by full-length cDNA: Ceres: 6801.                                                                                  | 257169_at   | 0.6 |
| lipid transfer protein, putative similar to GB:AAB47967 from [Hordeum vulgare], contains Pfam profile: PF00279 Plant lipid transfer protein far  | 257066_at   | 0.6 |
| hypothetical protein predicted by genemark.hmm; supported by cDNA: gi_15146180_gb_AY049231.1_                                                    | 257006_at   | 0.6 |
| hypothetical protein predicted by genemark.hmm                                                                                                   | 256624_at   | 0.6 |
| hypothetical protein ;supported by full-length cDNA: Ceres:38428.                                                                                | 256568_at   | 0.6 |
| unknown protein ;supported by full-length cDNA: Ceres:20812.                                                                                     | 256523_at   | 0.6 |
| hypothetical protein contains similarity to glucose-repressible alcohol dehydrogenase transcriptional effector GI:3859723 from (Candida albica   | 256491_at   | 0.6 |

|                                                                                                                                                    |             |     |
|----------------------------------------------------------------------------------------------------------------------------------------------------|-------------|-----|
| hypothetical protein predicted by genemark.hmm                                                                                                     | 256493_at   | 0.6 |
| hypothetical protein predicted by genemark.hmm; supported by full-length cDNA: Ceres: 126401.                                                      | 256413_at   | 0.6 |
| hypothetical protein predicted by genefinder;supported by full-length cDNA: Ceres:108003.                                                          | 256399_at   | 0.6 |
| arginyl-tRNA synthetase nearly identical to arginyl-tRNA synthetase [Arabidopsis thaliana] GI:2632103; supported by cDNA: gi_14030684_gb           | 256365_at   | 0.6 |
| disease resistance protein, putative similar to disease resistance protein RPP1-WsB [Arabidopsis thaliana] GI:9279731; supported by cDNA:          | 256303_at   | 0.6 |
| sulphate transporter, putative similar to high affinity sulphate transporter GB:X96431 GI:1217966 [Hordeum vulgare]; supported by cDNA: gi_        | 256244_at   | 0.6 |
| hypothetical protein predicted by genemark.hmm;supported by full-length cDNA: Ceres:112350.                                                        | 256142_at   | 0.6 |
| hypothetical protein contains similarity to photoperiod sensitivity quantitative trait locus (Hd1) GI:11094203 from [Oryza sativa];supported by fi | 256060_at   | 0.6 |
| integral membrane protein, putative similar to integral membrane protein 1 (Itm1) GI:508542 from [Mus musculus]                                    | 256029_at   | 0.6 |
| hypothetical protein contains Pfam profile: PF01344 kelch motif                                                                                    | 255947_at   | 0.6 |
| unknown protein contains similarity to protein phosphatase 2C GI:3777604 from [Rattus norvegicus]; supported by cDNA: gi_16226855_gb_A             | 255910_at   | 0.6 |
| Deetiolated1 (DET1) light signal transduction protein                                                                                              | 255799_at   | 0.6 |
| putative calmodulin-binding heat shock protein                                                                                                     | 255677_at   | 0.6 |
| putative protein transport factor ; supported by cDNA: gi_14334823_gb_AY035085.1_                                                                  | 255555_at   | 0.6 |
| putative protein similar to A. thaliana protein F15K9.3, GenBank accession number 3850566                                                          | 255466_at   | 0.6 |
| predicted protein of unknown function                                                                                                              | 255418_at   | 0.6 |
| putative GH3-like protein similar to soybean GH3 auxin-inducible protein, GenBank accession number X60033; supported by cDNA: gi_1664              | 255403_at   | 0.6 |
| putative WD-repeat membrane protein ; supported by cDNA: gi_16604678_gb_AY059784.1_                                                                | 255278_at   | 0.6 |
| D123 -like protein protein D123, Rattus norvegicus, EMBL:AAB60521                                                                                  | 255227_at   | 0.6 |
| putative protein chromatin structural protein homolog Supt5hp - Mus musculus,PID:g2754752                                                          | 255136_s_at | 0.6 |
| putative protein Arabidopsis thaliana chromosome II BAC T30B22 genomic sequence, gene T30B22.22, PID:g2529679                                      | 255028_at   | 0.6 |
| putative DNA-directed RNA polymerase DNA-directed RNA polymerase (EC 2.7.7.6) II largestchain - mouse, PIR2:A28490                                 | 255009_at   | 0.6 |
| putative protein m6A methyltransferase - Homo sapiens, PID:g2460037; supported by cDNA: gi_15028132_gb_AY046016.1_                                 | 255015_at   | 0.6 |
| Expressed protein ; supported by full-length cDNA: Ceres: 11425.                                                                                   | 254953_at   | 0.6 |
| putative translation elongation factor ts elongation factor ts (tsf) RP087 - Rickettsia prowazekii, PIR2:F71717                                    | 254932_at   | 0.6 |
| protein phosphatase type 1 PP1BG ;supported by full-length cDNA: Ceres:20905.                                                                      | 254923_at   | 0.6 |
| putative protein other predicted proteins from various species;supported by full-length cDNA: Ceres:12532.                                         | 254788_at   | 0.6 |
| putative protein HYA22 protein, Homo sapiens, PIR2:JC5707                                                                                          | 254681_at   | 0.6 |
| Expressed protein ; supported by full-length cDNA: Ceres: 29009.                                                                                   | 254628_at   | 0.6 |
| putative protein proline-rich protein APG, Arabidopsis thaliana, PIR2:S21961                                                                       | 254596_at   | 0.6 |
| UV-damaged DNA-binding protein- like damage-specific DNA binding protein 1, Homo sapiens, PIR2:I38908                                              | 254452_at   | 0.6 |
| putative MADS Box / AGL protein MADS-box protein AGL14, Arabidopsis thaliana, gb:U20184; supported by cDNA: gi_11545542_gb_AF312                   | 254286_at   | 0.6 |
| gamma-glutamylcysteine synthetase ; supported by cDNA: gi_15912188_gb_AY056372.1_                                                                  | 254270_at   | 0.6 |
| putative potassium transport protein (TRH1) high-affinity potassium transport protein KUP1, Arabidopsis thaliana, EMBL:AC004165                    | 254214_at   | 0.6 |
| polyprenyltransferase like protein para-hydroxybenzoate polyprenyltransferase (EC 2.5.1.-) precursor - yeast (Saccharomyces cerevisiae), E         | 254230_at   | 0.6 |
| ubiquitin-specific protease 16 (UBP16), putative similar to ubiquitin-specific protease 16 GI:11993477 [Arabidopsis thaliana]; supported by cC     | 254128_at   | 0.6 |
| putative protein various predicted proteins, Arabidopsis thaliana                                                                                  | 254078_at   | 0.6 |
| hypothetical protein ; supported by cDNA: gi_14517537_gb_AY039604.1_                                                                               | 254050_s_at | 0.6 |
| arginyl-tRNA synthetase                                                                                                                            | 254004_at   | 0.6 |
| putative protein                                                                                                                                   | 253959_at   | 0.6 |
| putative protein Uvi31, Schizosaccharomyces pombe, G1381578;supported by full-length cDNA: Ceres:112720.                                           | 253972_at   | 0.6 |
| phosphoprotein phosphatase (PPX-1)                                                                                                                 | 253928_at   | 0.6 |
| putative protein                                                                                                                                   | 253897_at   | 0.6 |
| putative protein ;supported by full-length cDNA: Ceres:11590.                                                                                      | 253823_at   | 0.6 |
| putative protein SNF7 protein - Saccharomyces cerevisiae,PIR2:S52590;supported by full-length cDNA: Ceres:7471.                                    | 253735_at   | 0.6 |
| hypothetical protein ;supported by full-length cDNA: Ceres:117732.                                                                                 | 253642_at   | 0.6 |
| SERINE CARBOXYPEPTIDASE II - like protein serine-type carboxypeptidase, Hordeum vulgare, PIR2:S44191; supported by cDNA: gi_152f                   | 253600_at   | 0.6 |
| hypothetical protein ; supported by cDNA: gi_13605745_gb_AF361854.1_AF361854                                                                       | 253452_at   | 0.6 |
| synaptobrevin-like protein synaptobrevin-like protein, Mus musculus;supported by full-length cDNA: Ceres:41543.                                    | 253462_at   | 0.6 |
| putative protein ATAC98, Arabidopsis thaliana; supported by cDNA: gi_15292682_gb_AY050775.1_                                                       | 253466_at   | 0.6 |
| putative protein ;supported by full-length cDNA: Ceres:29964.                                                                                      | 253422_at   | 0.6 |
| putative protein CDC28/cdc2-like kinase associating arginine-serine cyclophilin, Homo sapiens, PIR2:JC5314                                         | 253429_at   | 0.6 |
| Tic22 -like protein strong homology to Tic22 -Pisum sativum, PID:g3769671                                                                          | 253381_at   | 0.6 |
| hypothetical protein                                                                                                                               | 253314_at   | 0.6 |
| Expressed protein ; supported by full-length cDNA: Ceres: 14385.                                                                                   | 253324_at   | 0.6 |
| putative protein Human (H326) mRNA, Homo sapiens, gb:U06631                                                                                        | 253176_at   | 0.6 |
| cinnamyl-alcohol dehydrogenase ELI3-1 ; supported by cDNA: gi_13430625_gb_AF360225.1_AF360225                                                      | 252983_at   | 0.6 |
| SEC14 - like protein phosphatidylinositol-phosphatidylcholine transfer protein SEC14, Yarrowia lipolytica, PIR2:S43745; supported by cDNA:         | 252884_at   | 0.6 |
| putative transposase hypothetical protein a, maize transposable element Ac - Zea mays, PIR:T02916                                                  | 252847_at   | 0.6 |
| protein-tyrosine-phosphatase-like protein protein-tyrosine-phosphatase - Schizosaccharomyces pombe, PIR:A55446                                     | 252647_at   | 0.6 |
| hypothetical protein ;supported by full-length cDNA: Ceres:124275.                                                                                 | 252321_at   | 0.6 |
| vacuolar sorting protein 35 homolog vacuolar sorting protein 35 - Homo sapiens, EMBL:AF191298                                                      | 252150_at   | 0.6 |
| putative protein hypothetical protein - Synechocystis sp., EMBL:D90903;supported by full-length cDNA: Ceres:266414.                                | 252122_at   | 0.6 |
| Cytochrom P450 -like protein CYTOCHROME P450 97B2, Glycine max., gb:O48921                                                                         | 251969_at   | 0.6 |
| putative protein crp1 protein, Zea mays, PIR:T01685; supported by cDNA: gi_15982930_gb_AY057573.1_                                                 | 251936_at   | 0.6 |
| putative protein Hsp70 binding protein HspBP1 - Homo sapiens, EMBL:AF093420;supported by full-length cDNA: Ceres:37834.                            | 251919_at   | 0.6 |
| FKBP12 interacting protein (FIP37) ; supported by cDNA: gi_3859943_gb_AF084570.1_AF084570                                                          | 251887_at   | 0.6 |
| phosphatidylglycerophosphate synthase - like protein phosphatidylglycerophosphate synthase, Pseudomonas fluorescens, EMBL:L29642 co                | 251819_at   | 0.6 |
| E2, ubiquitin-conjugating enzyme 14 (UBC14) UbcAT3; identical to gi:2129757, S46656; supported by full-length cDNA: Ceres:25382.                   | 251802_at   | 0.6 |
| beta-1,3-glucanase - like protein probable beta-1,3-glucanase, Triticum aestivum, PIR:T06268; supported by full-length cDNA: Ceres: 8980.          | 251804_at   | 0.6 |
| putative protein exostose-related protein 2, Homo sapiens, PIR:JC5935                                                                              | 251764_at   | 0.6 |
| putative protein unknown protein At2g40800 - Arabidopsis thaliana, EMBL:AC007660                                                                   | 251685_at   | 0.6 |
| putative protein strictosidine synthase (EC 4.3.3.2) - Rauvolfia mannii (fragment)                                                                 | 251679_at   | 0.6 |
| 1-acylcerol-3-phosphate acyltransferase - like protein 1-acylcerol-3-phosphate acyltransferase, Brassica napus, Z49860;supported by full-len       | 251596_at   | 0.6 |
| serine/threonine-specific protein kinase -like protein serine/threonine-specific protein kinase NAK, Arabidopsis thaliana, PIR:S38326              | 251539_at   | 0.6 |
| putative protein protein-tyrosine kinase, Dictyostelium discoideum, PIR:A35670                                                                     | 251542_at   | 0.6 |
| farnesyltransferase subunit A (FTA) ; supported by cDNA: gi_3142697_gb_AF064542.1_AF064542                                                         | 251464_at   | 0.6 |
| putative protein hypothetical protein At2g45740 - Arabidopsis thaliana, EMBL:AC004665                                                              | 251352_at   | 0.6 |
| DEAD box RNA helicase RH12                                                                                                                         | 251362_at   | 0.6 |
| putative protein several hypothetical proteins - Arabidopsis thaliana; supported by cDNA: gi_14517361_gb_AY039515.1_                               | 251308_at   | 0.6 |
| putative protein Pm5 protein - Homo sapiens, PIR:S21977                                                                                            | 251269_at   | 0.6 |
| beta-glucosidase-like protein several beta-glucosidases                                                                                            | 251230_at   | 0.6 |
| hypothetical protein                                                                                                                               | 251148_at   | 0.6 |

|                                                                                                                                               |             |     |
|-----------------------------------------------------------------------------------------------------------------------------------------------|-------------|-----|
| putative protein CGI-77 protein, Homo sapiens, EMBL:AF151836;supported by full-length cDNA: Ceres:153131.                                     | 251149_at   | 0.6 |
| putative protein symplekin - Homo sapiens, EMBL:HSSYMPLEK                                                                                     | 251115_at   | 0.6 |
| putative protein ;supported by full-length cDNA: Ceres:35934.                                                                                 | 251094_at   | 0.6 |
| putative protein ;supported by full-length cDNA: Ceres:158771.                                                                                | 251008_at   | 0.6 |
| putative protein various predicted proteins, Arabidopsis thaliana                                                                             | 250879_at   | 0.6 |
| putative protein contains similarity to unknown protein (pir D70614); supported by cDNA: gi_14334951_gb_AY035149.1_                           | 250824_at   | 0.6 |
| eukaryotic translation initiation factor 2 alpha subunit-like protein ; supported by cDNA: gi_13358180_gb_AF324988.2_AF324988                 | 250779_at   | 0.6 |
| gamma-tubulin interacting protein-like                                                                                                        | 250686_at   | 0.6 |
| unknown protein ; supported by cDNA: gi_15451037_gb_AY054599.1_                                                                               | 250599_at   | 0.6 |
| RNA helicase (emb CAA09212.1) ; supported by cDNA: gi_14334881_gb_AY035114.1_                                                                 | 250538_at   | 0.6 |
| 15.9 kDa subunit of RNA polymerase II (gb AAB95261.1) ;supported by full-length cDNA: Ceres:21208.                                            | 250510_at   | 0.6 |
| unknown protein ; supported by cDNA: gi_15983383_gb_AF424566.1_AF424566                                                                       | 250459_at   | 0.6 |
| putative protein                                                                                                                              | 250481_at   | 0.6 |
| cytochrome P450 - like protein cytochrome P450, Helianthus tuberosus, EMBL:HTCYP81L                                                           | 250423_s_at | 0.6 |
| putative protein yIIC, Enterococcus faecalis, EMBL:EFU94707                                                                                   | 250394_at   | 0.6 |
| putative protein contains similarity to unknown protein (gb AAF03441.1)                                                                       | 250218_at   | 0.6 |
| putative protein de novo DNA methyltransferase 3, Danio rerio, EMBL:AF135438                                                                  | 250139_at   | 0.6 |
| rRNA methylase - like protein rRNA methylase SpoU, Aquifex aeolicus, PIR:H70443                                                               | 250137_at   | 0.6 |
| putative protein similar to unknown protein (gb AAF02163.1);supported by full-length cDNA: Ceres:115644.                                      | 250127_at   | 0.6 |
| putative protein unnamed ORF, Mus musculus, EMBL:AB041577; supported by cDNA: gi_11494361_gb_AF280057.1_AF280057                              | 249998_at   | 0.6 |
| E1, ubiquitin-like activating enzyme ECR1 identical to gi:2952433; supported by cDNA: gi_15215793_gb_AY050426.1_                              | 249926_at   | 0.6 |
| Ruv DNA-helicase-like protein ;supported by full-length cDNA: Ceres:113109.                                                                   | 249938_at   | 0.6 |
| protease-like protein                                                                                                                         | 249914_at   | 0.6 |
| serine protein kinase-like protein ;supported by full-length cDNA: Ceres:10218.                                                               | 249859_at   | 0.6 |
| protein kinase-like                                                                                                                           | 249678_at   | 0.6 |
| putative protein tyrosine aminotransferase-like; also similar to nicotianamine aminotransferase                                               | 249688_at   | 0.6 |
| putative protein tropomyosin gene 1, isoform 9D, D.melanogaster, EMBL:DMTRO13                                                                 | 249628_at   | 0.6 |
| putative protein similar to unknown protein (sp P54493)                                                                                       | 249510_at   | 0.6 |
| putative protein DNA DAMAGE-RESPONSIVE PROTEIN 48, Saccharomyces cerevisiae, EMBL:SCDDR48A; supported by cDNA: gi_16604:                      | 249416_at   | 0.6 |
| unknown protein ; supported by cDNA: gi_12006359_gb_AF281154.1_AF281154                                                                       | 249326_at   | 0.6 |
| ubiquitin-like protein ; supported by cDNA: gi_13899064_gb_AF370527.1_AF370527                                                                | 249217_at   | 0.6 |
| putative protein similar to unknown protein (gb AAF18661.1);supported by full-length cDNA: Ceres:7878.                                        | 249199_at   | 0.6 |
| 20S proteasome subunit PAF1 (gb AAC32062.1) ; supported by full-length cDNA: Ceres: 12455.                                                    | 249161_at   | 0.6 |
| E2, ubiquitin-conjugating enzyme 18 (UBC18) identical to gi:2801448; supported by cDNA: gi_16648721_gb_AY058137.1_                            | 249183_at   | 0.6 |
| unknown protein ;supported by full-length cDNA: Ceres:114691.                                                                                 | 248881_at   | 0.6 |
| calcium sensor protein, calcineurin-like ; supported by cDNA: gi_15866278_gb_AF411958.1_AF411958                                              | 248827_at   | 0.6 |
| 40S ribosomal protein S19 ; supported by cDNA: gi_15028320_gb_AY045963.1_                                                                     | 248800_at   | 0.6 |
| protein kinase (EC 2.7.1.37) 5 (pir JN0505) ; supported by cDNA: gi_15809918_gb_AY054227.1_                                                   | 248720_at   | 0.6 |
| SCARECROW gene regulator-like ; supported by cDNA: gi_8132288_gb_AF153443.1_AF153443                                                          | 248689_at   | 0.6 |
| putative protein strong similarity to unknown protein (pir T09371)                                                                            | 248631_at   | 0.6 |
| putative protein strong similarity to unknown protein (gb AAD32890.1)                                                                         | 248574_at   | 0.6 |
| putative protein contains similarity to alpha/beta hydrolase; supported by cDNA: gi_13877626_gb_AF370514.1_AF370514                           | 248531_at   | 0.6 |
| Expressed protein ; supported by cDNA: gi_13878180_gb_AF370353.1_AF370353                                                                     | 248532_at   | 0.6 |
| putative protein contains similarity to squamosa promoter binding protein;supported by full-length cDNA: Ceres:113229.                        | 248524_s_at | 0.6 |
| calcium-binding transporter-like protein                                                                                                      | 248485_at   | 0.6 |
| RAR1 (gb AAF18433.1) non-consensus GT acceptor splice site at exon 2; supported by full-length cDNA: Ceres: 99615.                            | 248379_at   | 0.6 |
| pectinesterase ; supported by cDNA: gi_15293286_gb_AY051077.1_                                                                                | 248263_at   | 0.6 |
| membrane related protein-like ;supported by full-length cDNA: Ceres:37644.                                                                    | 248199_at   | 0.6 |
| cyclic nucleotide and calmodulin-regulated ion channel supported by cDNA: gi_15027930_gb_AY045822.1_ ; supported by cDNA: gi_1632317          | 248153_at   | 0.6 |
| translation initiation factor-like protein                                                                                                    | 248146_at   | 0.6 |
| putative protein contains similarity to NRK-related kinase                                                                                    | 248060_at   | 0.6 |
| selenium-binding protein-like                                                                                                                 | 248075_at   | 0.6 |
| beta-amylase ; supported by cDNA: gi_15027954_gb_AY045834.1_                                                                                  | 248029_at   | 0.6 |
| heat shock protein (emb CAA72514.1)                                                                                                           | 248043_s_at | 0.6 |
| beta-1,3-glucanase-like protein                                                                                                               | 247963_at   | 0.6 |
| N-myristoyl transferase ;supported by full-length cDNA: Ceres:36525.                                                                          | 247960_at   | 0.6 |
| Expressed protein                                                                                                                             | 247924_at   | 0.6 |
| similar to unknown protein (pir S75584) ; supported by full-length cDNA: Ceres:3488.                                                          | 247816_at   | 0.6 |
| phytochelatin synthetase - like protein putative phytochelatin synthetase, Arabidopsis thaliana, EMBL:ATH6787;supported by full-length cDN.   | 247552_at   | 0.6 |
| putative protein various predicted proteins from different species; supported by cDNA: gi_15912286_gb_AY056421.1_                             | 247555_at   | 0.6 |
| putative protein predicted proteins, Arabidopsis thaliana; supported by full-length cDNA: Ceres: 38273.                                       | 247443_at   | 0.6 |
| putative protein predicted protein, Arabidopsis thaliana                                                                                      | 247398_at   | 0.6 |
| putative protein contains similarity to kinase                                                                                                | 247368_at   | 0.6 |
| histidinol dehydrogenase ;supported by full-length cDNA: Ceres:40175.                                                                         | 247303_at   | 0.6 |
| UVB-resistance protein UVR8 (gb AAD43920.1) ; supported by cDNA: gi_5478529_gb_AF130441.1_AF130441                                            | 247307_at   | 0.6 |
| putative protein strong similarity to unknown protein (gb AAF01562.1)                                                                         | 247312_at   | 0.6 |
| fructose-bisphosphatase-like protein ;supported by full-length cDNA: Ceres:1888.                                                              | 247278_at   | 0.6 |
| auxin-independent growth promoter-like protein                                                                                                | 247237_at   | 0.6 |
| 4-alpha-glucanotransferase ; supported by cDNA: gi_14335103_gb_AY037231.1_                                                                    | 247216_at   | 0.6 |
| unknown protein                                                                                                                               | 247166_at   | 0.6 |
| unknown protein ; supported by cDNA: gi_14334479_gb_AY034931.1_                                                                               | 247114_at   | 0.6 |
| 3-dehydroquinate synthase-like protein ;supported by full-length cDNA: Ceres:117923.                                                          | 247138_at   | 0.6 |
| selenium-binding protein-like                                                                                                                 | 247100_at   | 0.6 |
| succinate dehydrogenase flavoprotein alpha subunit (emb CAA05025.1) ; supported by cDNA: gi_15010745_gb_AY045674.1_                           | 247060_at   | 0.6 |
| formin-like protein                                                                                                                           | 246995_at   | 0.6 |
| putative protein similar to unknown protein (gb AAD25674.1)                                                                                   | 246958_at   | 0.6 |
| putative protein crp1 protein - Zea mays, PIR:T01685                                                                                          | 246964_at   | 0.6 |
| hexose transporter - like protein hexose transporter HT2, Lycopersicon esculentum, EMBL:LES132224; supported by cDNA: gi_15010579_g           | 246831_at   | 0.6 |
| putative protein isopenicillin N epimerase, Streptomyces clavuligerus, EMBL:M32324                                                            | 246832_at   | 0.6 |
| cyclin H-like protein cych (CAK associated cyclinH homolog) - Populus tremula x Populus tremuloides, EMBL:AF092743                            | 246762_at   | 0.6 |
| putative protein predicted protein, Drosophila melanogaster; supported by cDNA: gi_14334591_gb_AY034969.1_                                    | 246748_at   | 0.6 |
| putative protein kinesin heavy chain-like protein, potato, PIR:T07397                                                                         | 246759_at   | 0.6 |
| signal recognition particle 54 kDa protein 2 (SRP54), putative similar to signal recognition particle 54 kDa protein 2 (SRP54) Gi:556901 from | 246628_at   | 0.6 |



|                                                                                                                                                    |             |     |
|----------------------------------------------------------------------------------------------------------------------------------------------------|-------------|-----|
| bystin, putative similar to bystin GI:1160618 from [Homo sapiens]                                                                                  | 246575_at   | 0.6 |
| putative protein hypothetical protein T2E12.2 - Arabidopsis thaliana, EMBL:AC015986                                                                | 246495_at   | 0.6 |
| syntaxin homologue ;supported by full-length cDNA: Ceres:8257.                                                                                     | 246453_at   | 0.6 |
| unknown protein contains similarity to beta-1,4 mannosyltransferase GI:6970470 from [Homo sapiens]                                                 | 246351_at   | 0.6 |
| putative protein predicted protein BAA88548.1- Oryza sativa, EMBL:AP000969;supported by full-length cDNA: Ceres:18436.                             | 246318_at   | 0.6 |
| unknown protein                                                                                                                                    | 246288_at   | 0.6 |
| tubulin-like protein                                                                                                                               | 246278_at   | 0.6 |
| putative protein predicted protein, Haemophilus influenzae                                                                                         | 246169_at   | 0.6 |
| DNA binding protein ACBF - like DNA binding protein ACBF, Nicotiana tabacum, PIR:T03934                                                            | 246064_at   | 0.6 |
| putative protein predicted proteins, Drosophila melanogaster and Homo sapiens; supported by cDNA: gi_13605552_gb_AF361602.1_AF361                  | 246045_at   | 0.6 |
| putative protein KED, Nicotiana tabacum, EMBL:AB009883                                                                                             | 246059_at   | 0.6 |
| putative protein predicted proteins from various species;supported by full-length cDNA: Ceres:10217.                                               | 246017_at   | 0.6 |
| putative protein predicted proteins, Arabidopsis thaliana and Oryza sativa;supported by full-length cDNA: Ceres:254744.                            | 246019_at   | 0.6 |
| ascorbate oxidase-like protein ascorbate oxidase - Brassica juncea, EMBL:AF206721                                                                  | 246021_at   | 0.6 |
| leucine-rich repeat protein ; supported by cDNA: gi_13358181_gb_AF324989.2_AF324989                                                                | 246029_at   | 0.6 |
| putative protein outer membrane protein (IAP75) - Pisum sativum, L36858; supported by cDNA: gi_13430585_gb_AF360205.1_AF360205                     | 245914_at   | 0.6 |
| hypothetical protein predicted by genemark.hmm                                                                                                     | 245770_at   | 0.6 |
| hypothetical protein contains similarity to glucosidase II beta-subunit GI:5452942 from [Mus musculus]                                             | 245727_at   | 0.6 |
| SNF1 like protein kinase ; supported by cDNA: gi_13249502_gb_AY007221.1_                                                                           | 245563_at   | 0.6 |
| phosphatase like protein                                                                                                                           | 245557_at   | 0.6 |
| hypothetical protein                                                                                                                               | 245517_at   | 0.6 |
| F-box protein family, AtFBL4 contains similarity to grr1 GI:2407790 from [Glycine max];supported by full-length cDNA: Ceres:100411.                | 245344_at   | 0.6 |
| nuclear antigen homolog ;supported by full-length cDNA: Ceres:118826.                                                                              | 245350_at   | 0.6 |
| UFD1 like protein ; supported by full-length cDNA: Ceres: 207652.                                                                                  | 245313_at   | 0.6 |
| Expressed protein ; supported by full-length cDNA: Ceres: 30227.                                                                                   | 245319_at   | 0.6 |
| Expressed protein ; supported by full-length cDNA: Ceres: 307.                                                                                     | 245321_at   | 0.6 |
| calcium-dependent protein kinase-like protein strong similarity to calcium-dependent protein kinase 19, Arabidopsis thaliana, PIR:S71778~Ct        | 245156_at   | 0.6 |
| unknown protein                                                                                                                                    | 245134_s_at | 0.6 |
| putative cytochrome P450 ; supported by cDNA: gi_15810181_gb_AY056105.1_                                                                           | 245101_at   | 0.6 |
| PSII 43 KDa protein                                                                                                                                | 245003_at   | 0.6 |
| orf153b orf153b                                                                                                                                    | 244923_s_at | 0.6 |
| unknown protein                                                                                                                                    | 257459_at   | 0.6 |
| putative protein similarity to NCA2 protein, yeast, PIR:S54389~Contains Homeobox domain signature and profile AA305-328                            | 245206_at   | 0.6 |
| unknown protein ;supported by full-length cDNA: Ceres:6967.                                                                                        | 265284_at   | 0.5 |
| unknown protein contains similarity to guanine nucleotide exchange factor GI:4220427 from [Homo sapiens]; supported by cDNA: gi_158113f            | 264961_at   | 0.5 |
| putative replication factor Similar to gb M87339 replication factor C, 37-kDa subunit from Homo sapiens and is a member of PF 00004 ATPas          | 262501_at   | 0.5 |
| hypothetical protein contains similarity to phosphatidylinositol-glycan protein GI:303615 from [Homo sapiens]                                      | 261835_at   | 0.5 |
| unknown protein ;supported by full-length cDNA: Ceres:21241.                                                                                       | 260868_at   | 0.5 |
| putative splicing factor                                                                                                                           | 260606_at   | 0.5 |
| putative protein kinase contains Pfam profile: PF00069 Eukaryotic protein kinase domain                                                            | 260206_at   | 0.5 |
| hypothetical protein contains Pfam profile: PF00515 TPR Domain (5 copies)                                                                          | 259973_at   | 0.5 |
| putative small nuclear ribonucleoprotein (Sm-D1) similar to small nuclear ribonucleoprotein (Sm-D1) GB:AAD15345 [Arabidopsis thaliana];sup         | 259225_at   | 0.5 |
| unknown protein ; supported by cDNA: gi_15027906_gb_AY045810.1_                                                                                    | 257989_at   | 0.5 |
| hypothetical protein                                                                                                                               | 256172_at   | 0.5 |
| unknown protein contains similarity to apoptosis-related protein TFAR19 GI:2407068 from [Homo sapiens];supported by full-length cDNA: Cei          | 256001_at   | 0.5 |
| putative protein hypothetical protein T29E15.27 - Arabidopsis thaliana,PID:g3738334                                                                | 253586_s_at | 0.5 |
| DNA topoisomerase like- protein Bacillus subtilis DNA Topoisomerase I; PID:G520753                                                                 | 253566_at   | 0.5 |
| ubiquitin-specific protease 3 (UBP3) identical to GI:2347098; supported by cDNA: gi_2347097_gb_U76845.1_ATU76845                                   | 252832_at   | 0.5 |
| cell division cycle protein 23 homolog cell division cycle protein 23 - Homo sapiens,PID:g3283051                                                  | 252349_at   | 0.5 |
| putative protein putative protein At2g25690 - Arabidopsis thaliana, EMBL:AC006053;supported by full-length cDNA: Ceres:40080.                      | 251169_at   | 0.5 |
| putative protein Ube-1a, Mus musculus, EMBL:AB030503                                                                                               | 250880_at   | 0.5 |
| putative protein similar to unknown protein (emb CAB62355.1)                                                                                       | 249329_at   | 0.5 |
| histone acetyltransferase HAT B                                                                                                                    | 247972_at   | 0.5 |
| glycine-rich RNA-binding protein - like glycine-rich RNA-binding protein (GRRBP2), Euphorbia esula, TREMBL:AF031933;supported by full-le           | 246148_at   | 0.5 |
| hypothetical protein contains similarity to virulence regulator GI:9106522 from [Xylella fastidiosa]                                               | 245751_s_at | 0.5 |
| X03453 Bacteriophage P1 cre recombinase protein (-5 and -3 represent transcript regions 5 prime and 3 prime respectively)                          | 245751_s_at | 0.5 |
| Arabidopsis thaliana /REF=U84969 /DEF=ubiquitin (UBQ11) gene, complete cds /LEN=1140 (_5_ _M_ _3 represent transcript regions 5 primeX-AthAl-Ubq_M | 267558_at   | 0.5 |
| unknown protein ; supported by cDNA: gi_13605814_gb_AF367306.1_AF367306                                                                            | 267484_at   | 0.5 |
| E2, ubiquitin-conjugating enzyme 2 (UBC2) identical to gi:2689242, SP:P42745; supported by cDNA: gi_12083309_gb_AF332451.1_AF3324                  | 267082_at   | 0.5 |
| CPDK-related protein kinase CDPK:calcium dependent protein kinase; supported by cDNA: gi_5020365_gb_AF153351.1_AF153351                            | 266955_at   | 0.5 |
| mitochondrial ribosomal protein S14                                                                                                                | 266847_at   | 0.5 |
| hypothetical protein predicted by graii;supported by full-length cDNA: Ceres:142426.                                                               | 266835_at   | 0.5 |
| putative NADH dehydrogenase (ubiquinone oxidoreductase)                                                                                            | 266801_at   | 0.5 |
| putative nucleotide-binding protein ;supported by full-length cDNA: Ceres:33511.                                                                   | 266771_s_at | 0.5 |
| unknown protein                                                                                                                                    | 266748_at   | 0.5 |
| putative squamosa-promoter binding protein                                                                                                         | 266660_at   | 0.5 |
| hypothetical protein predicted by genscan; supported by cDNA: gi_15294291_gb_AF410337.1_AF410337                                                   | 266519_at   | 0.5 |
| unknown protein ; supported by cDNA: gi_16604658_gb_AY059774.1_                                                                                    | 266448_s_at | 0.5 |
| unknown protein ;supported by full-length cDNA: Ceres:12017.                                                                                       | 266421_at   | 0.5 |
| putative nonspecific lipid-transfer protein ; supported by cDNA: gi_15146309_gb_AY049296.1_                                                        | 266424_at   | 0.5 |
| unknown protein                                                                                                                                    | 266321_at   | 0.5 |
| putative cytochrome P450                                                                                                                           | 266080_at   | 0.5 |
| hypothetical protein predicted by genscan                                                                                                          | 265799_at   | 0.5 |
| unknown protein ; supported by cDNA: gi_15450955_gb_AY054558.1_                                                                                    | 265759_at   | 0.5 |
| putative membrane transporter                                                                                                                      | 265718_at   | 0.5 |
| putative WRKY DNA-binding protein ; supported by cDNA: gi_13506736_gb_AF224701.1_AF224701                                                          | 265481_at   | 0.5 |
| unknown protein ; supported by cDNA: gi_15028290_gb_AY045948.1_                                                                                    | 265444_s_at | 0.5 |
| aquaporin (plasma membrane intrinsic protein 2C) water channel protein in plasma membrane;supported by full-length cDNA: Ceres:11998.              | 265107_s_at | 0.5 |
| similar to glucose 1-dehydrogenase (AB000617); similar to EST gb T88100 similar to oxidoreductase-like protein GB:CAB75763 GI:7019662              | 265073_at   | 0.5 |
| unknown protein similar to putative tyrosine phosphatase GB:AAF81798 GI:8926334 from [Oryza sativa];supported by full-length cDNA: Cere:           | 265061_at   | 0.5 |
| hypothetical protein contains similarity to ABC transporter protein GI:6626257 from [Methanobacterium thermoautotrophicum]                         | 264984_at   | 0.5 |
| unknown protein ;supported by full-length cDNA: Ceres:13008.                                                                                       | 264851_at   | 0.5 |
| putative calmodulin-domain protein kinase CPK6 (calmodulin-domain protein kinase isoform 6, accession U31835); supported by cDNA: gi_1             |             |     |

|                                                                                                                                                   |             |     |
|---------------------------------------------------------------------------------------------------------------------------------------------------|-------------|-----|
| putative indole-3-acetate beta-glucosyltransferase similar to GB:AAB64022; supported by cDNA: gi_14423541_gb_AF387008.1_AF387008                  | 264873_at   | 0.5 |
| hypothetical protein predicted by genemark.hmm                                                                                                    | 264731_at   | 0.5 |
| hypothetical protein predicted by genemark.hmm; supported by cDNA: gi_14532671_gb_AY039960.1_                                                     | 264700_at   | 0.5 |
| unknown protein Contains similarity to Bos beta-mannosidase (gb U46067); supported by cDNA: gi_15028222_gb_AY045934.1_                            | 264656_at   | 0.5 |
| hypothetical protein contains similarity to Nicotiana tabacum membrane-associated salt-inducible protein (GB:U08285);supported by full-length     | 264591_at   | 0.5 |
| putative 60S ribosomal protein L17 similar to GB:P51413 from [Arabidopsis thaliana]; similar to ESTs gb L33542 and gb AA660016;supported          | 264438_at   | 0.5 |
| putative heat-shock protein similar to GB:AAD39315;supported by full-length cDNA: Ceres:37036.                                                    | 264464_at   | 0.5 |
| hypothetical protein predicted by genemark.hmm                                                                                                    | 264428_at   | 0.5 |
| putative chromodomain-helicase-DNA-binding protein similarity to Mi-2, Homo sapiens, GB:X86691; supported by cDNA: gi_6318929_gb_AF               | 264384_at   | 0.5 |
| putative translation initiation factor eIF-2, gamma subunit similar to gb U37354 from S. pombe. ESTs gb T41979, gb N37284 and gb N37529           | 264327_at   | 0.5 |
| hypothetical protein similar to hypothetical protein GI:2894569 from [Arabidopsis thaliana]; supported by cDNA: gi_15028186_gb_AY045916.:         | 264289_at   | 0.5 |
| hypothetical protein contains similarity to chloroplast membrane-associated protein IM30 GI:169106 from [Pisum sativum];supported by full-lei     | 264158_at   | 0.5 |
| hypothetical protein predicted by genscan                                                                                                         | 264171_at   | 0.5 |
| unknown protein similar to FUS5 protein of the COP9 complex, GB:AAC25563;supported by full-length cDNA: Ceres:40042.                              | 264150_at   | 0.5 |
| mercaptopyruvate sulfurtransferase (Mst1/Rdh1) identical to mercaptopyruvate sulfurtransferase GI:6009981 and thiosulfate sulfurtransferase       | 264095_at   | 0.5 |
| translin-like protein ; supported by cDNA: gi_14596008_gb_AY042792.1_                                                                             | 263843_at   | 0.5 |
| putative vacuolar proton-ATPase subunit ; supported by cDNA: gi_15450750_gb_AY053417.1_                                                           | 263764_at   | 0.5 |
| putative cap-binding protein ; supported by cDNA: gi_15192737_gb_AF272891.1_AF272891                                                              | 263727_at   | 0.5 |
| putative DNA-directed RNA polymerase II subunit                                                                                                   | 263621_at   | 0.5 |
| putative steroid binding protein ;supported by full-length cDNA: Ceres:10261.                                                                     | 263534_at   | 0.5 |
| molybdopterin synthase (CNX2) ;supported by full-length cDNA: Ceres:33192.                                                                        | 263472_at   | 0.5 |
| putative ATP-dependent RNA helicase                                                                                                               | 263435_at   | 0.5 |
| transcription initiation factor, putative similar to transcription initiation factor if, beta subunit GB:CAA22523 GI:4049502 from [Schizosaccharo | 262950_at   | 0.5 |
| hypothetical protein predicted by genemark.hmm; supported by cDNA: gi_15146253_gb_AY049268.1_                                                     | 262952_at   | 0.5 |
| unknown protein ;supported by full-length cDNA: Ceres:21947.                                                                                      | 262945_at   | 0.5 |
| auxin response factor 1 identical to auxin response factor 1 GI:2245378 from [Arabidopsis thaliana]; supported by cDNA: gi_2245377_gb_U8;         | 262914_at   | 0.5 |
| lipase, putative contains Pfam profile: PF00657 Lipase/Acylhydrolase with GD5L-like motif; supported by cDNA: gi_15027914_gb_AY045814             | 262749_at   | 0.5 |
| unknown protein ESTs gb F15498, gb H37515, gb T41906, gb T22448, gb W43356 and gb T20739 come from this gene;supported by full-ler                | 262709_at   | 0.5 |
| sterol glucosyltransferase, putative similar to sterol glucosyltransferase GI:4731867 from [Dictyostelium discoideum]                             | 262722_at   | 0.5 |
| unknown protein similar to hypothetical protein GB:AAD41412 GI:5263310 from (Arabidopsis thaliana); supported by cDNA: gi_13265575_gb_            | 262502_at   | 0.5 |
| serpin, putative similar to serpin GB:X95277 GI:1197576 from (Hordeum vulgare)                                                                    | 262440_at   | 0.5 |
| Expressed protein ; supported by full-length cDNA: Ceres: 97474.                                                                                  | 262340_at   | 0.5 |
| unknown protein                                                                                                                                   | 262280_at   | 0.5 |
| unknown protein contains similarity to 1-aminocyclopropane-1-carboxylate deaminases                                                               | 262247_at   | 0.5 |
| hypothetical protein predicted by genscan+                                                                                                        | 262207_at   | 0.5 |
| hypothetical protein contains similarity to protien kinase C (PRKC) GI:155789 from [Aplysia californica]                                          | 262209_at   | 0.5 |
| hypothetical protein contains similarity to nodule-specific protein Nj70 GI:3329366 from [Lotus japonicus]                                        | 262216_at   | 0.5 |
| Expressed protein ; supported by full-length cDNA: Ceres: 12159.                                                                                  | 262056_at   | 0.5 |
| hypothetical protein predicted by genemark.hmm                                                                                                    | 261909_at   | 0.5 |
| adenine nucleotide translocase, putative similar to adenine nucleotide translocase GI:6469340 from [Arabidopsis thaliana];supported by full-le    | 261767_s_at | 0.5 |
| hypothetical protein predicted by genemark.hmm                                                                                                    | 261622_at   | 0.5 |
| unknown protein similar to putative esterase GB:AAD17422 GI:4335745 from [Arabidopsis thaliana]                                                   | 261607_at   | 0.5 |
| ribosomal protein L9, putative similar to RIBOSOMAL PROTEIN L9 GB:P49209 from [Arabidopsis thaliana]                                              | 261620_s_at | 0.5 |
| NAC domain protein, putative similar to NAC domain protein NAM GB:AAD17313 GI:4325282 from [Arabidopsis thaliana];supported by full-le            | 261564_at   | 0.5 |
| hypothetical protein                                                                                                                              | 261553_at   | 0.5 |
| unknown protein contains Pfam profile:PF00560 Leucine Rich Repeat (4 copies); Pfam profile:PF00069 Eukaryotic protein kinase domain; Pf           | 261513_at   | 0.5 |
| unknown protein ; supported by cDNA: gi_14532543_gb_AY039896.1_                                                                                   | 261519_at   | 0.5 |
| mitochondrial ribosomal protein, putative similar to GB:CAA83057 from [Saccharomyces cerevisiae]; supported by cDNA: gi_14030694_gb_/_            | 261418_at   | 0.5 |
| hypothetical protein predicted by genemark.hmm                                                                                                    | 261322_at   | 0.5 |
| unknown protein                                                                                                                                   | 261299_at   | 0.5 |
| unknown protein ;supported by full-length cDNA: Ceres:6332.                                                                                       | 261225_at   | 0.5 |
| unknown protein ; supported by cDNA: gi_15450466_gb_AY052334.1_                                                                                   | 261209_at   | 0.5 |
| homeodomain protein, putative similar to homeodomain protein GI:7239157 from (Malus domestica)                                                    | 261139_at   | 0.5 |
| unknown protein                                                                                                                                   | 261075_at   | 0.5 |
| hypothetical protein contains similarity to RNA helicase (HRH1) GB:D50487 GI:1742909 from [Homo sapiens]                                          | 261008_at   | 0.5 |
| transmembrane protein, putative similar to TRANSMEMBRANE PROTEIN TMP21 GB:Q63584 from [Rattus norvegicus]                                         | 260852_at   | 0.5 |
| protein kinase interactor, putative similar to Pto kinase interactor GB:1AAC61805 GI:3668069 from [Lycopersicon esculentum]; supported by         | 260835_at   | 0.5 |
| glutathione transferase, putative similar to glutathione transferase GI:2853219 from [Carica papaya]; supported by full-length cDNA: Ceres: 3     | 260746_at   | 0.5 |
| chaperonin CPN10 identical to SP:P34893 from [Arabidopsis thaliana];supported by full-length cDNA: Ceres:26943.                                   | 260714_at   | 0.5 |
| unknown protein ;supported by full-length cDNA: Ceres:41461.                                                                                      | 260665_at   | 0.5 |
| unknown protein                                                                                                                                   | 260613_at   | 0.5 |
| putative WD-40 repeat protein                                                                                                                     | 260526_at   | 0.5 |
| putative glyoxalase II ; supported by cDNA: gi_2570339_gb_U90928.1_ATU90928                                                                       | 260552_at   | 0.5 |
| unknown protein                                                                                                                                   | 260446_at   | 0.5 |
| hypothetical protein predicted by genscan+                                                                                                        | 260455_at   | 0.5 |
| putative RING zinc finger protein Pfam HMM hit: zinc finger, C3HC4 type (RING finger)                                                             | 260321_at   | 0.5 |
| GMP synthase similar to GMP synthase GB:6323873 [Saccharomyces cerevisiae]                                                                        | 260294_at   | 0.5 |
| putative RNA-binding protein similar to RNA-binding protein GB:S46286 from [Nicotiana glauca]                                                     | 260245_at   | 0.5 |
| hypothetical protein predicted by genscan; supported by cDNA: gi_15292714_gb_AY050791.1_                                                          | 259864_at   | 0.5 |
| putative casein kinase I similar to casein kinase I GB:CAA55395 [Arabidopsis thaliana]; supported by cDNA: gi_16648960_gb_AY059850.1_             | 259865_at   | 0.5 |
| hypothetical protein similar to nodule inception protein GB:CAB61243 [Lotus japonicus]                                                            | 259888_at   | 0.5 |
| cytosolic factor, putative similar to GI:807956 from [Saccharomyces cerevisiae]; supported by cDNA: gi_15081613_gb_AY048199.1_                    | 259804_at   | 0.5 |
| RNA and export factor binding protein, putative similar to GI:7159943 from [Mus musculus] (RNA 6 (4), 638-650 (2000)); supported by cDNA          | 259825_at   | 0.5 |
| lipase/hydrolase, putative contains Pfam profile: PF00657 Lipase/Acylhydrolase with GD5L-like motif;supported by full-length cDNA: Ceres:2        | 259788_at   | 0.5 |
| unknown protein similar to GB:AAB81674 [Arabidopsis thaliana]                                                                                     | 259763_at   | 0.5 |
| replication factor, putative similar to GI:4972952 from [Mus musculus] (Mamm. Genome (2000) In press)                                             | 259690_at   | 0.5 |
| hypothetical protein                                                                                                                              | 259519_at   | 0.5 |
| hypothetical protein similar to unknown protein GI:3335359 from [Arabidopsis thaliana]                                                            | 259430_at   | 0.5 |
| hypothetical protein predicted by genemark.hmm;supported by full-length cDNA: Ceres:6115.                                                         | 259436_at   | 0.5 |
| DNA binding protein GT-1, putative similar to DNA binding protein GT-1 GI:598073 from (Arabidopsis thaliana)                                      | 259412_at   | 0.5 |
| unknown protein largely predicted by genscan; supported by cDNA: gi_11138670_gb_AF257187.1_AF257187                                               | 259215_at   | 0.5 |
| hypothetical protein similar to putative glycosylation enzyme GB:AAD14462 [Arabidopsis thaliana], putative protein GB:CAB43880 [Arabidop          | 259174_at   | 0.5 |
| hypothetical protein predicted by genefinder; supported by cDNA: gi_16604636_gb_AY059763.1_                                                       | 259156_at   | 0.5 |

|                                                                                                                                              |             |     |
|----------------------------------------------------------------------------------------------------------------------------------------------|-------------|-----|
| metallothionein-like protein similar to metallothionein GB:JQ2128 [Glycine max]; supported by cDNA: gi_14335167_gb_AY037263.1_               | 259008_at   | 0.5 |
| unknown protein similar to unknown protein GB:BAA83351 [Oryza sativa]; supported by cDNA: gi_14334835_gb_AY035091.1_                         | 258992_at   | 0.5 |
| putative aspartate kinase similar to aspartate kinase GB:CAA67376 (Arabidopsis thaliana); supported by full-length cDNA: Ceres: 6203.        | 258977_s_at | 0.5 |
| unknown protein contains Pfam profile: PF00514 armadillo/beta-catenin-like repeats (4 copies);supported by full-length cDNA: Ceres:34582.    | 258954_at   | 0.5 |
| hypothetical protein predicted by genefinder;supported by full-length cDNA: Ceres:40090.                                                     | 258856_at   | 0.5 |
| putative integral membrane protein contains Pfam profile: PF00892 Integral membrane protein                                                  | 258831_at   | 0.5 |
| putative 40S ribosomal protein identical to p40 protein homolog GB:AAB67866 [Arabidopsis thaliana]; similar to 40S ribosomal protein SA (P4  | 258799_at   | 0.5 |
| putative T-complex protein 1, theta subunit (TCP-1-Theta) similar to T-complex protein 1, theta subunit (TCP-1-Theta) GB:P42932 [Mus mus     | 258816_at   | 0.5 |
| putative GTP-binding protein (ATFP8) identical to ATFP8 GB:AAD00111 [Arabidopsis thaliana]; supported by cDNA: gi_4097556_gb_U64911          | 258730_at   | 0.5 |
| hypothetical protein predicted by genscan; supported by cDNA: gi_14517382_gb_AY039526.1_                                                     | 258749_at   | 0.5 |
| unknown protein                                                                                                                              | 258628_at   | 0.5 |
| L-allo-threonine aldolase, putative similar to L-ALLO-THREONINE ALDOLASE GB:O07051 from [Aeromonas jandaei];supported by full-lengt          | 258599_at   | 0.5 |
| unknown protein                                                                                                                              | 258542_at   | 0.5 |
| unknown protein ; supported by cDNA: gi_13878146_gb_AF370336.1_AF370336                                                                      | 258518_at   | 0.5 |
| DAG protein, putative similar to DAG PROTEIN GB:Q38732 from [Antirrhinum majus]                                                              | 258526_at   | 0.5 |
| Expressed protein ; supported by cDNA: gi_15293078_gb_AY050973.1_                                                                            | 258417_at   | 0.5 |
| hypothetical protein predicted by genscan+; supported by cDNA: gi_15028188_gb_AY045917.1_                                                    | 258403_at   | 0.5 |
| unknown protein                                                                                                                              | 258345_at   | 0.5 |
| hypothetical protein similar to putative transposase of transposable element Ac GB:CAA25635 [Zea mays]                                       | 258246_s_at | 0.5 |
| hypothetical protein predicted by genemark.hmm                                                                                               | 258211_at   | 0.5 |
| ribonucleoside-diphosphate reductase small chain almost identical to ribonucleoside-diphosphate reductase small chain GB:P50651 from [Ar     | 258106_at   | 0.5 |
| unknown protein ; supported by cDNA: gi_15983782_gb_AY056797.1_                                                                              | 258061_at   | 0.5 |
| hypothetical protein predicted by genemark                                                                                                   | 258034_at   | 0.5 |
| unknown protein ;supported by full-length cDNA: Ceres:39041.                                                                                 | 258039_at   | 0.5 |
| Dof zinc finger protein identical to GB:BAA33197 from [Arabidopsis thaliana]; supported by cDNA: gi_15027980_gb_AY045847.1_                  | 258044_at   | 0.5 |
| hypothetical protein predicted by genscan+;supported by full-length cDNA: Ceres:42922.                                                       | 257937_at   | 0.5 |
| unknown protein                                                                                                                              | 257879_at   | 0.5 |
| uridylyate kinase, putative similar to UMP-kinase GB:CAB38122 from [Lactococcus lactis]; supported by cDNA: gi_15292788_gb_AY050828.1        | 257756_at   | 0.5 |
| hypothetical protein predicted by genemark.hmm                                                                                               | 257724_at   | 0.5 |
| unknown protein ; supported by cDNA: gi_15292984_gb_AY050926.1_                                                                              | 257705_at   | 0.5 |
| RNA-binding protein contains Pfam profile: PF00076 RNA recognition motif. (a.k.a. RRM, RBD, or RNP domain)                                   | 257266_at   | 0.5 |
| unknown protein similar to DAG protein (required for chloroplast differentiation and palisade development) GB:Q38732 [Antirrhinum majus]; si | 257218_at   | 0.5 |
| Tic22, putative similar to Tic22 GB:AAC64606 from [Pisum sativum]                                                                            | 257199_at   | 0.5 |
| unknown protein contains Pfam profile: PF01188 Mandelate racemase/muconate lactonizing enzyme family; supported by cDNA: gi_1387812          | 257067_at   | 0.5 |
| hypothetical protein predicted by genemark.hmm, contains Pfam profile:PF00400 WD domain, G-beta repeat                                       | 256967_at   | 0.5 |
| aminotransferase, putative similar to aminotransferase GB:CAA19897 from [Streptomyces coelicolor A3(2)]; supported by cDNA: gi_1433446       | 256765_at   | 0.5 |
| unknown protein                                                                                                                              | 256754_at   | 0.5 |
| unknown protein                                                                                                                              | 256658_at   | 0.5 |
| At14a-1 protein identical to At14a protein GB:AAD26355 GI:4589123 [Arabidopsis thaliana] [Gene 230 (1), 33-40 (1999)]                        | 256601_s_at | 0.5 |
| hypothetical protein                                                                                                                         | 256483_at   | 0.5 |
| unknown protein                                                                                                                              | 256485_at   | 0.5 |
| putative clathrin heavy chain similar to clathrin heavy chain GB:AAC49294 [Glycine max]                                                      | 256437_s_at | 0.5 |
| Sm-like protein contains Pfam profile: PF01423: Sm protein; supported by full-length cDNA: Ceres: 23170.                                     | 256333_at   | 0.5 |
| arginine N-methyltransferase 3, putative similar to arginine N-methyltransferase 3 GB:AAC40158 [Rattus norvegicus]                           | 256288_at   | 0.5 |
| betaine aldehyde dehydrogenase, putative similar to betaine aldehyde dehydrogenase (BADH) GI:1813537 [Spinacia oleracea]                     | 256246_at   | 0.5 |
| phosphoinositide specific phospholipase (AtPLC2) identical to phosphoinositide specific phospholipase (AtPLC2) GI:857374 [Arabidopsis thal   | 256156_at   | 0.5 |
| hypothetical protein contains Pfam profile: PF01084 ribosomal protein S18                                                                    | 256043_at   | 0.5 |
| unknown protein                                                                                                                              | 256049_at   | 0.5 |
| putative protein kinase contains a protein kinase domain profile (PDOC00100); supported by cDNA: gi_13448034_gb_AF339146.1_AF339146          | 255872_at   | 0.5 |
| putative potassium transporter ; supported by cDNA: gi_2384670_gb_AF012657.1_AF012657                                                        | 255829_at   | 0.5 |
| putative malate oxidoreductase                                                                                                               | 255683_at   | 0.5 |
| putative tetrahydrofolate synthase similar to other dehydrogenase/cyclohydrolase domains                                                     | 255685_s_at | 0.5 |
| putative ABC transporter                                                                                                                     | 255594_at   | 0.5 |
| predicted protein of unknown function similar to bacterial tolB proteins but unclear if T7B11.13 is involved in viral transport              | 255543_at   | 0.5 |
| Expressed protein ; supported by cDNA: gi_5059351_gb_AF154574.1_AF154574                                                                     | 255512_at   | 0.5 |
| F-box protein family, AtFBL20 contains similarity to N7 protein GI:3273101 from [Medicago truncatula];supported by full-length cDNA: Ceres:  | 255231_at   | 0.5 |
| hypothetical protein                                                                                                                         | 255021_at   | 0.5 |
| putative protein phosphatase like protein - Arabidopsis thaliana.PIR2:T05589;supported by full-length cDNA: Ceres:152712.                    | 254918_at   | 0.5 |
| kinase-like protein protein kinase rck, Mus musculus, PIR2:I48733; supported by cDNA: gi_14532759_gb_AY040004.1_                             | 254560_at   | 0.5 |
| resistance protein - like downy mildew resistance protein RPP5, Arabidopsis thaliana, PATX:G2109275                                          | 254585_at   | 0.5 |
| small GTP-binding protein - like GTP-binding protein RHA1, Arabidopsis thaliana, PIR2:S23727; supported by cDNA: gi_15450604_gb_AY05         | 254530_at   | 0.5 |
| putative protein hypothetical protein YPL065w yeast, PIR2:S60925                                                                             | 254422_at   | 0.5 |
| receptor like protein (fragment) ES43 protein, barley, PIR2:S44281                                                                           | 254342_at   | 0.5 |
| putative protein putative protein F6118_70 - Arabidopsis thaliana, PATX:E1283548;supported by full-length cDNA: Ceres:121159.                | 254121_at   | 0.5 |
| transcriptional activator CBF1 CRT CRE binding factor 1 involved in low-temperature-responsive gene expression00; supported by cDNA: gi_     | 254074_at   | 0.5 |
| putative protein ;supported by full-length cDNA: Ceres:14312.                                                                                | 254010_at   | 0.5 |
| putative protein transcription termination factor nusB, Synechocystis sp., PIR2:S76233;supported by full-length cDNA: Ceres:943.             | 254011_at   | 0.5 |
| fimbriin-like protein (ATFIM1) ; supported by cDNA: gi_2905892_gb_U66424.1_ATU66424                                                          | 253956_at   | 0.5 |
| putative protein ENOD20 gene, Medicago truncatula, X99467;supported by full-length cDNA: Ceres:33380.                                        | 253875_at   | 0.5 |
| putative protein MSP1 protein, Saccharomyces cerevisia, PIR2:A49506;supported by full-length cDNA: Ceres:142160.                             | 253861_at   | 0.5 |
| putative protein KIAA0210 gene, Homo sapiens. gb:D86965; supported by cDNA: gi_5032257_gb_AF126057.2_AF126057                                | 253647_at   | 0.5 |
| transcription factor-like protein Arabidopsis thaliana auxin response factor 4 (ARF4) - Arabidopsis thaliana, PID:g4102598; supported by cDN | 253662_at   | 0.5 |
| putative protein predicted proetin, Arabidopsis thaliana                                                                                     | 253555_at   | 0.5 |
| putaive DNA-binding protein DNA-binding protein WRKY3 - Petroselinum crispum, PIR2:S72445;supported by full-length cDNA: Ceres:1195;         | 253535_at   | 0.5 |
| monogalactosyldiacylglycerol synthase - like protein monogalactosyldiacylglycerol synthase, Cucumis sativus, PID:g1805254; supported by c    | 253489_at   | 0.5 |
| aspartate aminotransferase ;supported by full-length cDNA: Ceres:33414., Ceres:103854.                                                       | 253481_at   | 0.5 |
| protein kinase AME3 ; supported by cDNA: gi_642133_dbj_D45355.1_ATHPKAME3C                                                                   | 253395_at   | 0.5 |
| homeobox gene ATH1                                                                                                                           | 253411_at   | 0.5 |
| putative protein AT.I.24, Arabidopsis thaliana, gb:U63815;supported by full-length cDNA: Ceres:4868.                                         | 253382_at   | 0.5 |
| putative protein ABC-type transport protein sl1623 -Synechocystis,PIR2:S74812                                                                | 253328_at   | 0.5 |
| Putative S-phase-specific ribosomal protein                                                                                                  | 253248_at   | 0.5 |
| putative protein ;supported by full-length cDNA: Ceres:21838.                                                                                | 253171_at   | 0.5 |
| putative protein predicted protein, Arabidopsis thaliana;supported by full-length cDNA: Ceres:1368.                                          | 253183_at   | 0.5 |

|                                                                                                                                             |             |     |
|---------------------------------------------------------------------------------------------------------------------------------------------|-------------|-----|
| putative protein CRP1, Zea mays, gb:AF073522;supported by full-length cDNA: Ceres:5482.                                                     | 253116_at   | 0.5 |
| putative protein permease 1 - Mesembryanthemum crystallinum,PID:g3202040                                                                    | 253021_at   | 0.5 |
| hypothetical protein                                                                                                                        | 253025_at   | 0.5 |
| putative protein hypothetical protein HI0722 (pepQ 5 region) -E.coli,PID:g1790283;supported by full-length cDNA: Ceres:18344.               | 253007_at   | 0.5 |
| xyloglucan endo-transglycosylase ; supported by cDNA: gi_15810248_gb_AY056163.1_                                                            | 252607_at   | 0.5 |
| nuclear receptor binding factor-like protein nuclear receptor binding factor-1 NRBF-1 - Rattus norvegicus, EMBL:AB015724;supported by full- | 252542_at   | 0.5 |
| putative protein                                                                                                                            | 252552_at   | 0.5 |
| putative protein Na+-dependent inorganic phosphate cotransporter, Rattus norvegicus, U07609FUNC 99                                          | 252444_at   | 0.5 |
| RNA-binding protein-like protein various RNA-binding proteins;supported by full-length cDNA: Ceres:9763.                                    | 252464_at   | 0.5 |
| flavonol synthase - like protein SRG1 protein, Arabidopsis thaliana, PIR:S44261; supported by full-length cDNA: Ceres: 25787.               | 252213_at   | 0.5 |
| putative protein APRIL protein, Homo sapiens, EMBL:HSAPRIL_1                                                                                | 252174_at   | 0.5 |
| putative protein                                                                                                                            | 251869_at   | 0.5 |
| putative protein various Arabidopsis thaliana predicted proteins                                                                            | 251853_at   | 0.5 |
| serine/threonine-specific protein kinase -like serine/threonine-specific protein kinase NAK, Arabidopsis thaliana, PIR:S38326               | 251789_at   | 0.5 |
| putative protein strictosidine synthase (EC 4.3.3.2) - Rauvolfia mannii (fragment);supported by full-length cDNA: Ceres:98698.              | 251658_at   | 0.5 |
| putative protein DYSKERIN (NUCLEOLAR PROTEIN NAP57) - Rattus norvegicus, EMBL:Z34922; supported by cDNA: gi_8901185_gb_AF2                  | 251667_at   | 0.5 |
| putative protein Bet1 homolog - Rattus norvegicus, EMBL:RN42755; supported by cDNA: gi_14030602_gb_AF368175.1_AF368175                      | 251579_at   | 0.5 |
| putative protein F-box protein Fbl2 - Homo sapiens, EMBL:AF174589;supported by full-length cDNA: Ceres:35534.                               | 251532_at   | 0.5 |
| hypothetical protein                                                                                                                        | 251463_at   | 0.5 |
| putative protein hypothetical protein At2g46420 - Arabidopsis thaliana, EMBL:AC006526                                                       | 251274_at   | 0.5 |
| putative protein various predicted proteins;supported by full-length cDNA: Ceres:105564.                                                    | 251138_at   | 0.5 |
| putative protein putative protein F4P12.100 - Arabidopsis thaliana, EMBL:AL132966; supported by cDNA: gi_15810368_gb_AY056223.1_            | 251055_at   | 0.5 |
| protein kinase ATN1-like protein protein kinase ATN1 (EC 2.7.1.-) - Arabidopsis thaliana, PIR:S61766                                        | 251063_at   | 0.5 |
| Expressed protein ; supported by full-length cDNA: Ceres: 12197.                                                                            | 250921_at   | 0.5 |
| monodehydroascorbate reductase (NADH) - like protein monodehydroascorbate reductase (NADH), cucumber, PIR:JU0182;supported by full          | 250916_at   | 0.5 |
| putative protein similar to unknown protein (emb CAB88266.1);supported by full-length cDNA: Ceres:157058.                                   | 250643_at   | 0.5 |
| DnaJ homologue (gb AAB91418.1) ; supported by cDNA: gi_2689719_gb_AF037168.1_AF037168                                                       | 250672_at   | 0.5 |
| unknown protein                                                                                                                             | 250602_s_at | 0.5 |
| unknown protein ; supported by cDNA: gi_16648868_gb_AY059804.1_                                                                             | 250540_at   | 0.5 |
| putative protein 110K5.11, unknown protein, Sorghum bicolor, EMBL:AF124045; supported by cDNA: gi_13605727_gb_AF361845.1_AF361              | 250409_at   | 0.5 |
| glucosyltransferase -like protein glucosyltransferase IS5a, salicylate-induced, common tobacco, PIR:T03747                                  | 250264_at   | 0.5 |
| peptide transporter - like protein peptide transporter, Hordeum vulgare, EMBL:AF023472                                                      | 250261_at   | 0.5 |
| cobalamin biosynthesis protein                                                                                                              | 250243_at   | 0.5 |
| putative protein various unknown or predicted proteins, Arabidopsis thaliana                                                                | 250178_at   | 0.5 |
| putative protein contains similarity to unknown protein (emb CAB89315.1); supported by cDNA: gi_15451067_gb_AY054614.1_                     | 249863_at   | 0.5 |
| putative protein contains similarity to ABA-repsponsive protein                                                                             | 249823_s_at | 0.5 |
| iron superoxide dismutase 3 (gb AAC24834.1) ;supported by full-length cDNA: Ceres:26637.                                                    | 249826_at   | 0.5 |
| putative protein contains similarity to polyA polymerase                                                                                    | 249821_at   | 0.5 |
| putative protein contains similarity to unknown protein (emb CAB87908.1);supported by full-length cDNA: Ceres:152842.                       | 249793_at   | 0.5 |
| 26S proteasome, non-ATPase regulatory subunit ;supported by full-length cDNA: Ceres:23276.                                                  | 249796_at   | 0.5 |
| putative protein similar to unknown protein (emb CAB62460.1);supported by full-length cDNA: Ceres:5684.                                     | 249751_at   | 0.5 |
| putative protein CG14881, Drosophila melanogaster, EMBL:AE003713;supported by full-length cDNA: Ceres:9887.                                 | 249612_at   | 0.5 |
| receptor protein kinase - like protein receptor serine/threonine kinase PR5K, Arabidopsis thaliana, EMBL:AT48698                            | 249486_at   | 0.5 |
| thioredoxin ; supported by full-length cDNA: Ceres: 7791.                                                                                   | 249385_at   | 0.5 |
| glutathione transferase AtGST 10 (emb CAA10457.1) ; supported by cDNA: gi_15451157_gb_AY054659.1_                                           | 249291_at   | 0.5 |
| putative protein similar to unknown protein (gb AAF19669.1)                                                                                 | 249253_at   | 0.5 |
| alcohol dehydrogenase (EC 1.1.1.1) class III (pir S71244) ;supported by full-length cDNA: Ceres:33315.                                      | 249077_at   | 0.5 |
| putative protein contains similarity to heat shock transcription factor                                                                     | 249000_at   | 0.5 |
| putative protein strong similarity to unknown protein (pir T04533);supported by full-length cDNA: Ceres:18140.                              | 248883_at   | 0.5 |
| unknown protein                                                                                                                             | 248785_at   | 0.5 |
| DNA-binding protein-like                                                                                                                    | 248788_at   | 0.5 |
| putative protein similar to unknown protein (emb CAB78730.1)                                                                                | 248751_at   | 0.5 |
| sodium-dicarboxylate cotransporter-like ;supported by full-length cDNA: Ceres:107593.                                                       | 248756_at   | 0.5 |
| RNA-binding protein-like ;supported by full-length cDNA: Ceres:1876.                                                                        | 248758_at   | 0.5 |
| unknown protein                                                                                                                             | 248737_at   | 0.5 |
| unknown protein                                                                                                                             | 248745_at   | 0.5 |
| putative protein contains similarity to unknown protein (dbj BAA91655.1)                                                                    | 248612_at   | 0.5 |
| adenylate kinase ;supported by full-length cDNA: Ceres:21741.                                                                               | 248506_at   | 0.5 |
| unknown protein                                                                                                                             | 248471_at   | 0.5 |
| putative protein similar to unknown protein (gb AAF03497.1)                                                                                 | 248410_at   | 0.5 |
| unknown protein                                                                                                                             | 248394_at   | 0.5 |
| putative protein similar to unknown protein (pir  S77462); supported by cDNA: gi_15081647_gb_AY048216.1_                                    | 248287_at   | 0.5 |
| putative protein similar to unknown protein (gb AAF34839.1); supported by cDNA: gi_13926341_gb_AF372918.1_AF372918                          | 248230_at   | 0.5 |
| ubiquitin-like protein SMT3-like ; supported by full-length cDNA: Ceres: 13697.                                                             | 248103_at   | 0.5 |
| cell division protein FtsZ chloroplast homolog precursor (sp Q42545) ; supported by cDNA: gi_14334637_gb_AY034992.1_                        | 248105_at   | 0.5 |
| molybdopterin synthase sulphurylase (gb AAD18050.1) ; supported by cDNA: gi_4337039_gb_AF124159.1_AF124159                                  | 248108_at   | 0.5 |
| serine O-acetyltransferase (EC 2.3.1.30) Sat-52 (pir S71207) ;supported by full-length cDNA: Ceres:119783.                                  | 247982_at   | 0.5 |
| lipid transfer protein; glossy1 homolog                                                                                                     | 247884_at   | 0.5 |
| putative protein predicted proteins, Arabidopsis thaliana and Oryza sativa                                                                  | 247741_at   | 0.5 |
| putative protein predicted proteins, C.elegans and D.melanogastersupported by full-length cDNA: Ceres:105188.                               | 247587_at   | 0.5 |
| histone deacetylase - like histone deacetylase HDA2, Mus musculus, PIR:T13964                                                               | 247558_at   | 0.5 |
| glutaredoxin-like protein ; supported by full-length cDNA: Ceres: 96557.                                                                    | 247418_at   | 0.5 |
| putative protein contains similarity to ARI-like RING zinc finger protein                                                                   | 247345_at   | 0.5 |
| phosphatidylinositol 4-kinase (emb CAB37928.1)                                                                                              | 247321_s_at | 0.5 |
| immunophilin (gb AAB57847.1) ;supported by full-length cDNA: Ceres:10243.                                                                   | 247281_at   | 0.5 |
| putative protein contains similarity to unknown protein (emb CAB89361.1);supported by full-length cDNA: Ceres:106187.                       | 247248_at   | 0.5 |
| ABC transporter-like                                                                                                                        | 247232_at   | 0.5 |
| ReMemBR-H2 protein JR700 (gb AAF32325.1) ; supported by cDNA: gi_14334831_gb_AY035089.1_                                                    | 247108_at   | 0.5 |
| putative protein small unique nuclear receptor co-repressor (SUN-CoR) - Mus musculus, EMBL:AF031426; supported by full-length cDNA: C       | 246921_at   | 0.5 |
| seryl-tRNA synthetase ; supported by cDNA: gi_15293240_gb_AY051054.1_                                                                       | 246780_at   | 0.5 |
| putative protein RING finger mgB protein, cytosolic - Dictyostelium discoideum, PIR:S68824                                                  | 246731_at   | 0.5 |
| putative protein hypothetical protein slr1702 - Synechocystis sp., PIR:S75312; supported by cDNA: gi_13877992_gb_AF370259.1_AF37025         | 246736_at   | 0.5 |
| ribosomal protein S1 ;supported by full-length cDNA: Ceres:4565.                                                                            | 246673_at   | 0.5 |

|                                                                                                                                    |             |     |
|------------------------------------------------------------------------------------------------------------------------------------|-------------|-----|
| hypothetical protein predicted by genemark.hmm                                                                                     | 246576_at   | 0.5 |
| formate dehydrogenase (FDH) ;supported by full-length cDNA: Ceres:7530.                                                            | 246595_at   | 0.5 |
| putative protein hypothetical proteins - Arabidopsis thaliana                                                                      | 246497_at   | 0.5 |
| putative protein predicted proteins - Arabidopsis thaliana;supported by full-length cDNA: Ceres:34944.                             | 246452_at   | 0.5 |
| Expressed protein ; supported by full-length cDNA: Ceres: 16205.                                                                   | 246454_at   | 0.5 |
| spindle pole body protein-like spindle pole body protein - Homo sapiens, EMBL:AF042379; supported by cDNA: gi_14532825_gb_AY040037 | 246428_at   | 0.5 |
| root cap 1 (RCP1) ;supported by full-length cDNA: Ceres:10216.                                                                     | 246434_at   | 0.5 |
| putative protein serine kinase SRPK2, Homo sapiens, EMBL:AC005070                                                                  | 246334_at   | 0.5 |
| putative protein                                                                                                                   | 246237_at   | 0.5 |
| SOH1 - like protein SOH1, Saccharomyces cerevisiae, PIR:S47895                                                                     | 246140_at   | 0.5 |
| chloroplast Cpn21 protein ; supported by cDNA: gi_14334611_gb_AY034979.1_                                                          | 246003_at   | 0.5 |
| putative protein predicted proteins, Arabidopsis thaliana; supported by cDNA: gi_15810384_gb_AY056231.1_                           | 245972_at   | 0.5 |
| putative protein predicted proteins - different species                                                                            | 245936_at   | 0.5 |
| putative protein ER66 - Lycopersicon esculentum, EMBL:AF096260                                                                     | 245910_at   | 0.5 |
| salt-inducible protein homolog                                                                                                     | 245597_at   | 0.5 |
| PRL1 protein ;supported by full-length cDNA: Ceres:123113.                                                                         | 245358_at   | 0.5 |
| Expressed protein ; supported by full-length cDNA: Ceres: 42223.                                                                   | 245333_at   | 0.5 |
| hypothetical protein ; supported by full-length cDNA: Ceres: 91870.                                                                | 245303_at   | 0.5 |
| putative dimethyladenosine transferase ; supported by cDNA: gi_14532649_gb_AY039949.1_                                             | 245122_at   | 0.5 |
| cytochrome B6                                                                                                                      | 244976_at   | 0.5 |
| hypothetical protein predicted by genscan                                                                                          | 257374_at   | 0.5 |
| En/Spm-like transposon protein related to En/Spm transposon family of maize                                                        | 267353_at   | 0.5 |
| putative protein various predicted proteins, Arabidopsis thaliana                                                                  | 254997_s_at | 0.5 |
| putative protein other hypothetical proteins - Arabidopsis thaliana                                                                | 254965_at   | 0.5 |

**Table 2: Transcripts elevated in cells during heat shock compared to unstressed plants**

|                                                                                                                                              | <b>Affymetrix<br/>number</b> | <b>log<sub>2</sub> fold<br/>increase</b> |
|----------------------------------------------------------------------------------------------------------------------------------------------|------------------------------|------------------------------------------|
| Arabidopsis mitochondrion-localized small heat shock protein (AtHSP23.6-mito) ; supported by cDNA: gi_1669865_gb_U72958.1_ATU72958           | 254059_at                    | 10.1                                     |
| heat shock protein 18 ; supported by full-length cDNA: Ceres:97197.                                                                          | 247691_at                    | 9.8                                      |
| heat shock protein 17.6A                                                                                                                     | 250351_at                    | 8.8                                      |
| heat shock protein 17.6-II ; supported by full-length cDNA: Ceres:2281.                                                                      | 250296_at                    | 8.7                                      |
| heat shock protein 17 ; supported by cDNA: gi_15294149_gb_AF410266.1_AF410266                                                                | 252515_at                    | 7.4                                      |
| mitochondrial heat shock 22 kd protein-like ; supported by full-length cDNA: Ceres: 268536.                                                  | 248434_at                    | 7.4                                      |
| heat shock protein, putative similar to heat shock protein GI:19617 from [Medicago sativa]; supported by full-length cDNA: Ceres:32795.      | 262911_s_at                  | 7.1                                      |
| putative small heat shock protein ; supported by full-length cDNA: Ceres:25828.                                                              | 266294_at                    | 6.7                                      |
| 17.6 kDa heat shock protein (AA 1-156) identical to GI:4376161 from (Arabidopsis thaliana) (Nucleic Acids Res. 17 (19), 7995 (1989))         | 260978_at                    | 6.7                                      |
| hypothetical protein                                                                                                                         | 244931_at                    | 6.6                                      |
| heat shock protein 101 (HSP101) identical to heat shock protein 101 GI:6715468 GB:AAF26423 from [Arabidopsis thaliana]                       | 260248_at                    | 5.3                                      |
| peptidylprolyl isomerase                                                                                                                     | 248657_at                    | 5.2                                      |
| heat shock protein 22.0 ; supported by cDNA: gi_511795_gb_U11501.1_ATU11501                                                                  | 255811_at                    | 5.1                                      |
| expressed protein supported by cDNA: Ceres:13917.                                                                                            | 254574_at                    | 5.1                                      |
| putative ascorbate peroxidase strong similarity to ascorbate peroxidase GB:CAA56340                                                          | 258695_at                    | 5                                        |
| heat shock protein 21                                                                                                                        | 253884_at                    | 5                                        |
| NADH dehydrogenase subunit 7                                                                                                                 | 244925_at                    | 5                                        |
| maturase                                                                                                                                     | 244926_s_at                  | 4.9                                      |
| elongation factor 1B alpha-subunit (emb CAB64729.1)                                                                                          | 250304_at                    | 4.8                                      |
| putative major latex protein major latex protein type 1 - Arabidopsis thaliana, EMBL:X91960; supported by cDNA: gi_13605713_gb_AF361838.1_AF | 254234_at                    | 4.7                                      |
| NADH dehydrogenase subunit 5 (nad5) (trans-splicing part 2 of 2)                                                                             | 257337_at                    | 4.7                                      |
| hypothetical protein                                                                                                                         | 266045_s_at                  | 4.6                                      |
| cytochrome c oxidase subunit 2                                                                                                               | 244950_at                    | 4.6                                      |
| heat shock protein 70 identical to heat shock protein 70 GB:CAA05547 GI:3962377 [Arabidopsis thaliana]; supported by cDNA: gi_15809831_gb_AY | 256245_at                    | 4.5                                      |
| NADH dehydrogenase subunit 6                                                                                                                 | 244953_s_at                  | 4.5                                      |
| hypothetical protein                                                                                                                         | 265228_s_at                  | 4.4                                      |
| hypothetical protein                                                                                                                         | 263509_s_at                  | 4.4                                      |
| NADH dehydrogenase subunit 9                                                                                                                 | 244943_at                    | 4.3                                      |
| putative protein similar to unknown protein (pir T05035)                                                                                     | 248959_at                    | 4.1                                      |
| heat-shock protein ; supported by cDNA: gi_166769_gb_M62984.1_ATHHSP83                                                                       | 248332_at                    | 4.1                                      |
| ubiquinol--cytochrome-c reductase-like protein ubiquinol--cytochrome-c reductase (EC 1.10.2.2) - Arabidopsis thaliana, PIR:T05357            | 246944_at                    | 4.1                                      |
| NADH dehydrogenase subunit 5 (nad5) (trans-splicing part 1 of 2)                                                                             | 257338_s_at                  | 4.1                                      |
| putative protein predicted proteins - Arabidopsis thaliana                                                                                   | 246178_s_at                  | 4                                        |
| hypothetical protein                                                                                                                         | 244901_at                    | 4                                        |
| hypothetical protein                                                                                                                         | 266014_s_at                  | 3.9                                      |
| hypothetical protein                                                                                                                         | 263502_s_at                  | 3.9                                      |
| putative protein ; supported by full-length cDNA: Ceres:16476.                                                                               | 251012_at                    | 3.9                                      |
| NADH dehydrogenase subunit 4L                                                                                                                | 244902_at                    | 3.9                                      |
| cytochrome c oxidase subunit 1                                                                                                               | 257333_at                    | 3.9                                      |
| protein kinase-like protein                                                                                                                  | 247026_at                    | 3.9                                      |

|                                                                                                                                                     |             |     |
|-----------------------------------------------------------------------------------------------------------------------------------------------------|-------------|-----|
| Expressed protein ; supported by full-length cDNA: Ceres:270232                                                                                     | 254263_at   | 3.7 |
| putative chloroplast protein import component similar to P. sativum Tic20 chloroplast protein import component, GenBank accession number AF095      | 255430_at   | 3.6 |
| putative GTP-binding protein similar to GTP-binding protein GB:AAB53256 [Arabidopsis thaliana]                                                      | 259913_at   | 3.5 |
| cytochrome c biogenesis orf203 Protein sequence is in conflict with the conceptual translation                                                      | 244919_at   | 3.5 |
| hypothetical protein                                                                                                                                | 257323_at   | 3.5 |
| hypothetical protein                                                                                                                                | 266044_s_at | 3.4 |
| putative protein similar to unknown protein (pir  T03813)                                                                                           | 247293_at   | 3.4 |
| hypothetical protein                                                                                                                                | 244906_at   | 3.4 |
| hypothetical protein                                                                                                                                | 257321_at   | 3.4 |
| unknown protein                                                                                                                                     | 263515_at   | 3.3 |
| unknown protein ;supported by full-length cDNA: Ceres:31665.                                                                                        | 265670_s_at | 3.2 |
| ethylene-responsive transcriptional coactivator, putative similar to GB:AAD46402 from [Lycopersicon esculentum] (Plant J. 18 (6), 589-600 (1999));s | 258133_at   | 3.2 |
| receptor like protein kinase receptor like protein kinase LRK1 - Arabidopsis thaliana, EMBL:ATLECGENE                                               | 252574_at   | 3.2 |
| cytochrome P450-like protein cytochrome P450 CYP94A1 - Vicia sativa,PIR2:T08014                                                                     | 252368_at   | 3.2 |
| hypothetical protein                                                                                                                                | 246769_at   | 3.2 |
| predicted protein                                                                                                                                   | 266012_s_at | 3.1 |
| putative protein auxin-induced protein 10A -Glycine max,PID:g255579                                                                                 | 254809_at   | 3.1 |
| hypothetical protein predicted by genscan+                                                                                                          | 256285_at   | 3.1 |
| Expressed protein ; supported by full-length cDNA: Ceres: 38545.                                                                                    | 253737_at   | 3   |
| heat shock transcription factor -like protein heat shock transcription factor HSF1, Arabidopsis thaliana, PIR:S52641                                | 250910_at   | 3   |
| hypothetical protein Similar to Nicotiana tumor-related protein (gb 26453)                                                                          | 264661_at   | 2.9 |
| putative two-component phosphorelay mediator similar to two-component phosphorelay mediators (ATHP1-3) GB:BAA37110, GB:BAA37111, GB:B               | 259329_at   | 2.9 |
| unknown protein                                                                                                                                     | 257239_at   | 2.9 |
| transcriptional activator CBF1 CRT CRE binding factor 1 involved in low-temperature-responsive gene expression00; supported by cDNA: gi_18990       | 254074_at   | 2.9 |
| hypothetical protein                                                                                                                                | 244942_at   | 2.9 |
| putative protein similar to unknown protein (gb AAC73025.1); supported by cDNA: gi_14532515_gb_AY039882.1_                                          | 250825_at   | 2.9 |
| putative protein predicted protein, Arabidopsis thaliana                                                                                            | 254289_at   | 2.8 |
| late embryogenesis abundant protein, putative similar to late embryogenesis abundant protein GI:1350540 from [Picea glauca]                         | 264758_at   | 2.8 |
| hypothetical protein similar to hypothetical protein GB:AAD50003 GI:5734738 from [Arabidopsis thaliana];supported by full-length cDNA: Ceres:3759   | 262452_at   | 2.8 |
| putative short-chain type dehydrogenase/reductase similar to short-chain type dehydrogenase/reductase GB:Q08632 [Picea abies]; supported by cD      | 258815_at   | 2.8 |
| putative jasmonic acid regulatory protein similar to jasmonic acid 2 GB:AAF04915 from [Lycopersicon esculentum];supported by full-length cDNA: Cx   | 258395_at   | 2.8 |
| stress-induced protein sti1 -like protein stress-induced protein sti1 -Glycine max,PID:g872116                                                      | 254839_at   | 2.8 |
| hypothetical protein                                                                                                                                | 244903_at   | 2.8 |
| putative small heat shock protein ;supported by full-length cDNA: Ceres:99763.                                                                      | 267336_at   | 2.7 |
| unknown protein EST gb ATTS0295 comes from this gene;supported by full-length cDNA: Ceres:20380.                                                    | 264580_at   | 2.7 |
| RING-H2 zinc finger protein ATL5, putative similar to RING-H2 zinc finger protein ATL5 GI:4928401 from [Arabidopsis thaliana]                       | 261927_at   | 2.7 |
| putative DNA-binding protein ; supported by cDNA: gi_15028172_gb_AY045909.1_                                                                        | 255568_at   | 2.7 |
| hypothetical protein predicted by genemark.hmm                                                                                                      | 245243_at   | 2.7 |
| ribosomal protein L16                                                                                                                               | 244944_s_at | 2.7 |
| hypothetical protein                                                                                                                                | 244904_at   | 2.7 |
| ATP synthase subunit 9                                                                                                                              | 257339_s_at | 2.7 |
| hypothetical protein predicted by genemark.hmm; supported by cDNA: gi_16648713_gb_AY058133.1_                                                       | 261539_at   | 2.6 |

|                                                                                                                                                       |             |     |
|-------------------------------------------------------------------------------------------------------------------------------------------------------|-------------|-----|
| similar to 14KD proline-rich protein DC2.15 precursor (sp P14009); similar to ESTs emb Z17709 and emb Z47685 similar to hybrid proline-rich protei    | 265111_at   | 2.6 |
| thaumatin-like protein thaumatin-like protein, Arabidopsis thaliana, Pir2:S71175; supported by cDNA: gi_13430505_gb_AF360165.1_AF360165               | 253104_at   | 2.6 |
| low-molecular-weight heat shock protein - like cytosolic class I small heat-shock protein HSP17.5, Castanea sativa, EMBL:CSA9880                      | 249575_at   | 2.6 |
| hypothetical protein                                                                                                                                  | 265227_s_at | 2.5 |
| hypothetical protein                                                                                                                                  | 265229_s_at | 2.5 |
| hypothetical protein                                                                                                                                  | 265230_s_at | 2.5 |
| hypothetical protein                                                                                                                                  | 244921_s_at | 2.5 |
| subtilisin-like serine protease contains similarity to subtilisin-like protease AIR3 GI:4218991 from [Arabidopsis thaliana]                           | 254979_at   | 2.5 |
| hypothetical protein                                                                                                                                  | 265242_at   | 2.4 |
| putative heat shock protein ;supported by full-length cDNA: Ceres:25528.                                                                              | 263374_at   | 2.4 |
| transformer-SR ribonucleoprotein, putative similar to GB:Y09506 from [Nicotiana tabacum] (Plant Mol. Biol. 35 (3), 261-269 (1997)); supported by c[   | 261081_at   | 2.4 |
| hypothetical protein predicted by genemark.hmm;supported by full-length cDNA: Ceres:24933.                                                            | 260744_at   | 2.4 |
| putative protein similar to unknown protein (pir  T07711);supported by full-length cDNA: Ceres:23920.                                                 | 247431_at   | 2.4 |
| putative protein similar to unknown protein (emb CAB89402.1)                                                                                          | 247181_at   | 2.4 |
| unknown protein ; supported by cDNA: gi_15450380_gb_AY052291.1_                                                                                       | 266316_at   | 2.3 |
| putative galactinol synthase ;supported by full-length cDNA: Ceres:124236.                                                                            | 263320_at   | 2.3 |
| unknown protein ;supported by full-length cDNA: Ceres:9435.                                                                                           | 262947_at   | 2.3 |
| putative protein RING-H2 zinc finger protein ATL4 - Arabidopsis thaliana, EMBL:AF132014;supported by full-length cDNA: Ceres:3137.                    | 252751_at   | 2.3 |
| AP2 domain transcription factor-like protein                                                                                                          | 248389_at   | 2.3 |
| NADH dehydrogenase subunit 3 Protein sequence is in conflict with the conceptual translation                                                          | 244920_s_at | 2.3 |
| 70kD heat shock protein ;supported by full-length cDNA: Ceres:98979.                                                                                  | 265675_at   | 2.2 |
| hypothetical protein                                                                                                                                  | 265238_s_at | 2.2 |
| hypothetical protein                                                                                                                                  | 263510_s_at | 2.2 |
| ethylene-responsive element binding factor, putative similar to ethylene-responsive element binding factor GI:8809573 from [Nicotiana sylvestris];su  | 261470_at   | 2.2 |
| heat shock transcription factor HSF1, putative similar to GB:S52641 from [Arabidopsis thaliana] (Plant Mol. Biol. 26, 353-362 (1994)); supported by c | 258139_at   | 2.2 |
| putative protein similar to unknown protein (pir  T05226);supported by full-length cDNA: Ceres:96.                                                    | 249174_at   | 2.2 |
| hypothetical protein                                                                                                                                  | 257318_at   | 2.2 |
| putative RING zinc finger protein                                                                                                                     | 265853_at   | 2.2 |
| hypothetical protein predicted by genscan and genefinder                                                                                              | 266590_at   | 2.1 |
| hypothetical protein                                                                                                                                  | 266039_s_at | 2.1 |
| hypothetical protein                                                                                                                                  | 265233_s_at | 2.1 |
| hypothetical protein                                                                                                                                  | 265235_s_at | 2.1 |
| unknown protein                                                                                                                                       | 263467_at   | 2.1 |
| putative calmodulin similar to calmodulin GB:CAA56517 [Leishmania tarentolae]; Pfam HMM hit: EF hand;supported by full-length cDNA: Ceres:300!        | 259879_at   | 2.1 |
| unknown protein very similar to unknown protein GB:AAC39468 from [Arabidopsis thaliana]; supported by cDNA: gi_14335087_gb_AY037223.1_                | 258402_at   | 2.1 |
| hypothetical protein                                                                                                                                  | 254731_at   | 2.1 |
| putative protein EREBP-3 homolog, Stylosanthes hamata, EMBL:U91982; supported by cDNA: gi_15010555_gb_AY045579.1_                                     | 252214_at   | 2.1 |
| putative protein predicted proteins, Arabidopsis thaliana                                                                                             | 251951_s_at | 2.1 |
| hypothetical protein predicted by genemark.hmm                                                                                                        | 264217_at   | 2   |
| TINY-like transcription factor Contains similarity to transcription factor (TINY) isolog T02O04.22 gb 2062174 from A. thaliana BAC gb AC001645;sup    | 264202_at   | 2   |
| hypothetical protein                                                                                                                                  | 263503_s_at | 2   |
| unknown protein ;supported by full-length cDNA: Ceres:35218.                                                                                          | 256522_at   | 2   |



|                                                                                                                                                   |             |     |
|---------------------------------------------------------------------------------------------------------------------------------------------------|-------------|-----|
| DnaJ protein, putative contains Pfam profile: PF00226: DnaJ domain;supported by full-length cDNA: Ceres:25796.                                    | 256221_at   | 2   |
| hypothetical protein predicted by genscan+                                                                                                        | 255891_at   | 2   |
| glycine-rich cell wall protein-like glycine-rich protein 1.0 precursor, Phaseolus vulgaris, PIR1:S01821; supported by cDNA: gi_14030676_gb_AF3754 | 254667_at   | 2   |
| putative protein hypothetical protein F1N19.27 - Arabidopsis thaliana, EMBL:AC009519                                                              | 251292_at   | 2   |
| conglutin gamma - like protein conglutin gamma precursor, Lupinus angustifolius, PIR:S21426; supported by cDNA: gi_15010797_gb_AY045700.1_        | 249923_at   | 2   |
| putative protein predicted proteins, Homo sapiens and Drosophila melanogaster                                                                     | 247847_at   | 2   |
| protein phosphatase 2C - like ABA induced protein phosphatase 2C, Fagus sylvatica, EMBL:FSY277743; supported by cDNA: gi_15809791_gb_AY           | 247723_at   | 2   |
| pyrroline-5-carboxylate reductase ;supported by full-length cDNA: Ceres:36386.                                                                    | 246594_at   | 2   |
| hypothetical protein                                                                                                                              | 257332_at   | 2   |
| Expressed protein ; supported by full-length cDNA: Ceres: 123915.                                                                                 | 267036_at   | 1.9 |
| unknown protein ; supported by cDNA: gi_15010737_gb_AY045670.1_                                                                                   | 266984_at   | 1.9 |
| hypothetical protein                                                                                                                              | 266042_s_at | 1.9 |
| putative beta-1,3-glucanase ;supported by full-length cDNA: Ceres:1126.                                                                           | 265648_at   | 1.9 |
| putative glycine-rich protein ; supported by cDNA: gi_15215617_gb_AY050337.1_                                                                     | 265511_at   | 1.9 |
| unknown protein ;supported by full-length cDNA: Ceres:34827.                                                                                      | 265387_at   | 1.9 |
| H+-transporting ATPase protein, putative similar to H+-transporting ATPase chain E GB:CAB43050 GI:4850294 from [Arabidopsis thaliana]             | 262354_at   | 1.9 |
| hypothetical protein similar to hypothetical protein GB:AAD45997 GI:5668770 from (Arabidopsis thaliana)                                           | 262322_at   | 1.9 |
| unknown protein ;supported by full-length cDNA: Ceres:6937.                                                                                       | 261485_at   | 1.9 |
| bZIP transcription factor ATB2, putative similar to GB:CAA18838 from [Arabidopsis thaliana]                                                       | 261114_at   | 1.9 |
| unknown protein ;supported by full-length cDNA: Ceres:13102.                                                                                      | 260005_at   | 1.9 |
| chaperonin 60 beta, putative very similar to GB:JT0901 from [Arabidopsis thaliana] (Gene 111 (2), 175-181 (1992))                                 | 256983_at   | 1.9 |
| 82.09 and 30.80) similar to alternative splicing factor ASF                                                                                       | 255472_at   | 1.9 |
| putative protein Arabidopsis thaliana nap gene,PID:e1234813;supported by full-length cDNA: Ceres:38344.                                           | 253872_at   | 1.9 |
| Expressed protein ; supported by full-length cDNA: Ceres: 147351.                                                                                 | 252946_at   | 1.9 |
| hypothetical protein ; supported by cDNA: gi_13877826_gb_AF370176.1_AF370176                                                                      | 251964_at   | 1.9 |
| protein kinase-like protein Pto kinase interactor 1 - Lycopersicon esculentum, EMBL:U28007; supported by cDNA: gi_15451117_gb_AY054639.1_         | 251494_at   | 1.9 |
| putative protein chloroplast Cpn21 protein - Arabidopsis thaliana, EMBL:ATH010818;supported by full-length cDNA: Ceres:35721.                     | 251425_at   | 1.9 |
| putative protein various predicted proteins, Arabidopsis thaliana                                                                                 | 250493_at   | 1.9 |
| potassium-dependent sodium-calcium exchanger - like protein cone sodium-calcium potassium exchanger (NCKX), Homo sapiens, EMBL:AF17798            | 250053_at   | 1.9 |
| arabinogalactan-protein (gb AAC77823.1) ;supported by full-length cDNA: Ceres:25423.                                                              | 247279_at   | 1.9 |
| unknown protein ;supported by full-length cDNA: Ceres:124621.                                                                                     | 247139_at   | 1.9 |
| Expressed protein ; supported by full-length cDNA: Ceres: 59.                                                                                     | 246125_at   | 1.9 |
| SYBL1 like protein                                                                                                                                | 245513_at   | 1.9 |
| cytochrome c biogenesis orf452                                                                                                                    | 244951_s_at | 1.9 |
| hypothetical protein                                                                                                                              | 244918_at   | 1.9 |
| unknown protein ;supported by full-length cDNA: Ceres:35441.                                                                                      | 267483_at   | 1.8 |
| putative senescence-associated protein 12 ;supported by full-length cDNA: Ceres:40806.                                                            | 264787_at   | 1.8 |
| Expressed protein ; supported by full-length cDNA: Ceres: 31252.                                                                                  | 264726_at   | 1.8 |
| unknown protein similar to Lambda-PRL2 Arabidopsis thaliana cDNA clone GB:R30041                                                                  | 264354_s_at | 1.8 |
| putative SF2/ASF splicing modulator, Srp30 similar to GB:CAB42558                                                                                 | 264255_at   | 1.8 |
| hypothetical protein predicted by genefinder                                                                                                      | 260522_x_at | 1.8 |
| unknown protein ;supported by full-length cDNA: Ceres:114376.                                                                                     | 259977_at   | 1.8 |

|                                                                                                                                                     |             |     |
|-----------------------------------------------------------------------------------------------------------------------------------------------------|-------------|-----|
| unknown protein                                                                                                                                     | 257670_at   | 1.8 |
| AP2 domain containing protein RAP2, putative similar to AP2 domain containing protein RAP2.4 GI:2281633 from [Arabidopsis thaliana]; supported      | 255926_at   | 1.8 |
| DRE CRT-binding protein DREB1C involved in low-temperature-responsive gene expression00; supported by cDNA: gi_3738227_dbj_AB007789.1_              | 254075_at   | 1.8 |
| peroxidase ATP17a -like protein peroxidase ATP17a -A.thaliana,PID:e252638;supported by full-length cDNA: Ceres:32346.                               | 253332_at   | 1.8 |
| putative protein cim1 induced allergen, Glycine max, EMBL:U03860;supported by full-length cDNA: Ceres:27534.                                        | 252563_at   | 1.8 |
| putative protein MEL-26, Caenorhabditis elegans, U67737; supported by cDNA: gi_14532781_gb_AY040015.1_                                              | 252367_at   | 1.8 |
| putative protein P58 protein, Bos primigenius taurus, PIR:A56534;supported by full-length cDNA: Ceres:146009.                                       | 250930_at   | 1.8 |
| pectin methylesterase-like                                                                                                                          | 248807_at   | 1.8 |
| unknown protein                                                                                                                                     | 247393_at   | 1.8 |
| unknown protein ; supported by cDNA: gi_13877834_gb_AF370180.1_AF370180                                                                             | 247177_at   | 1.8 |
| seed imbitition protein-like seed imbitition protein Sip1 - Hordeum vulgare, EMBL:M77475                                                            | 246114_at   | 1.8 |
| blue copper binding protein ;supported by full-length cDNA: Ceres:7767.                                                                             | 246099_at   | 1.8 |
| cytochrome c biogenesis orf206                                                                                                                      | 244945_at   | 1.8 |
| hypothetical protein                                                                                                                                | 257324_at   | 1.8 |
| hypothetical protein predicted by genemark.hmm                                                                                                      | 261514_at   | 1.8 |
| similar to gibberellin-regulated proteins                                                                                                           | 266613_at   | 1.7 |
| hypothetical protein                                                                                                                                | 263505_s_at | 1.7 |
| hypothetical protein predicted be genemark.hmm                                                                                                      | 262336_at   | 1.7 |
| protein kinase, putative (fragment) similar to GB:BAA94509 from [Populus nigra]                                                                     | 261436_at   | 1.7 |
| hypothetical protein predicted by genemark.hmm                                                                                                      | 261065_at   | 1.7 |
| unknown protein                                                                                                                                     | 259812_at   | 1.7 |
| HSC70-interacting protein, putative similar to HSC70-INTERACTING PROTEIN GB:P50502 from [Homo sapiens]                                              | 258187_at   | 1.7 |
| 9-cis-epoxycarotenoid dioxygenase, putative similar to 9-cis-epoxycarotenoid dioxygenase GB:AAF26356 [Phaseolus vulgaris]; supported by cDNA:       | 257280_at   | 1.7 |
| zinc finger protein, putative similar to Cys2/His2-type zinc finger protein 2 GB:BAA85107 from [Arabidopsis thaliana]; supported by cDNA: gi_15028; | 257022_at   | 1.7 |
| putative symbiosis-related protein ;supported by full-length cDNA: Ceres:119712.                                                                    | 255283_at   | 1.7 |
| Expressed protein ; supported by full-length cDNA: Ceres: 24475.                                                                                    | 254846_at   | 1.7 |
| hypothetical protein                                                                                                                                | 254414_at   | 1.7 |
| putative protein activating signal cointegrator 1 - Homo sapiens, EMBL:AF168418; supported by full-length cDNA: Ceres:13265.                        | 252424_at   | 1.7 |
| putative protein ;supported by full-length cDNA: Ceres:1198.                                                                                        | 250098_at   | 1.7 |
| integral membrane protein-like                                                                                                                      | 248392_at   | 1.7 |
| profilin-like protein ; supported by full-length cDNA: Ceres: 102364.                                                                               | 247964_at   | 1.7 |
| Expressed protein ; supported by full-length cDNA: Ceres: 11699.                                                                                    | 247657_at   | 1.7 |
| phosphoglycerate kinase, putative similar to phosphoglycerate kinase GI:155584 from [Zymomonas mobilis]                                             | 246393_at   | 1.7 |
| putative protein predicted proteins, Arabidopsis thaliana;supported by full-length cDNA: Ceres:32958.                                               | 245905_at   | 1.7 |
| putative ATP-dependent RNA helicase                                                                                                                 | 267627_at   | 1.7 |
| putative zinc finger protein                                                                                                                        | 255094_at   | 1.7 |
| putative beta-1,3-glucanase                                                                                                                         | 267335_s_at | 1.6 |
| putative beta-alanine-pyruvate aminotransferase ;supported by full-length cDNA: Ceres:147543.                                                       | 267035_at   | 1.6 |
| putative calcium binding protein ;supported by full-length cDNA: Ceres:31535.                                                                       | 266447_at   | 1.6 |
| hypothetical protein                                                                                                                                | 266013_s_at | 1.6 |
| hypothetical protein                                                                                                                                | 265232_s_at | 1.6 |
| unknown protein ;supported by full-length cDNA: Ceres:36437.                                                                                        | 265184_at   | 1.6 |

|                                                                                                                                                    |             |     |
|----------------------------------------------------------------------------------------------------------------------------------------------------|-------------|-----|
| step II splicing factor, putative similar to step II splicing factor SLU7 GB:AAD13774 GI:4249705 (Homo sapiens)                                    | 264633_at   | 1.6 |
| hypothetical protein predicted by genemark.hmm                                                                                                     | 261655_at   | 1.6 |
| disulfide isomerase-related protein, putative similar to GB:AAB50217 from [Homo sapiens]                                                           | 261167_at   | 1.6 |
| putative heat-shock protein similar to heat-shock protein precursor GB:S49340 [Secale cereale]; contains Pfam profile: Heat shock hsp90 proteins   | 259248_at   | 1.6 |
| germin-like protein similar to germin precursor GB:P26759 (Triticum aestivum); contains Pfam profile: PF01072 germin family                        | 258746_at   | 1.6 |
| hypothetical protein ;supported by full-length cDNA: Ceres:41730.                                                                                  | 254721_at   | 1.6 |
| putative protein hypothetical protein YPL065w yeast, PIR2:S60925                                                                                   | 254422_at   | 1.6 |
| Expressed protein ; supported by full-length cDNA: Ceres: 9341.                                                                                    | 253292_at   | 1.6 |
| CDC48 - like protein transitional endoplasmic reticulum ATPase, Arabidopsis thaliana, PIR:S60112                                                   | 251975_at   | 1.6 |
| putative protein similar to unknown protein (gb AAD21732.1)                                                                                        | 249850_at   | 1.6 |
| U2 snRNP auxiliary factor, small subunit ; supported by cDNA: gi_15723292_gb_AF409140.1_AF409140                                                   | 249164_at   | 1.6 |
| unknown protein                                                                                                                                    | 248774_at   | 1.6 |
| putative protein similar to unknown protein (pir  T06016); supported by cDNA: gi_10880504_gb_AF195895.1_AF195895                                   | 247965_at   | 1.6 |
| outer membrane lipoprotein - like outer membrane lipoprotein, Citrobacter freundii, PIR:I40710;supported by full-length cDNA: Ceres:17098.         | 247851_at   | 1.6 |
| Ran binding protein 1 homolog - like Ran binding protein 1 homolog, Arabidopsis thaliana, EMBL:ATU62742                                            | 247771_at   | 1.6 |
| putative protein hypothetical protein T26J14.6 - Arabidopsis thaliana, EMBL:AC011915; supported by cDNA: gi_13358202_gb_AF325010.2_AF325010        | 246506_at   | 1.6 |
| luminal binding protein ; supported by cDNA: gi_1303694_dbj_D84414.1_ATHBIPA                                                                       | 245956_s_at | 1.6 |
| dormancy-associated protein, putative similar to dormancy-associated protein GI:2995990 from [Arabidopsis thaliana]; supported by cDNA: gi_1433    | 245668_at   | 1.6 |
| phytochelatin synthetase-like protein gene_id:K17E7.120;supported by full-length cDNA: Ceres:98007.                                                | 245228_at   | 1.6 |
| hypothetical protein                                                                                                                               | 244959_s_at | 1.6 |
| hypothetical protein contains similarity to cyclin-dependent kinase inhibitor GB:AAC34660 GI:3550262 from [Arabidopsis thaliana]                   | 257483_at   | 1.6 |
| hypothetical protein predicted by genscan; supported by cDNA: gi_15146245_gb_AY049264.1_                                                           | 266889_at   | 1.5 |
| putative fatty acid elongase                                                                                                                       | 265918_at   | 1.5 |
| putative CCAAT-box binding transcription factor                                                                                                    | 265466_at   | 1.5 |
| putative gigantea protein strong similarity to GB:CAB56039 from [Arabidopsis thaliana]; supported by cDNA: gi_6002679_gb_AF105064.1_AF10506        | 264211_at   | 1.5 |
| putative aquaporin (tonoplast intrinsic protein gamma) ;supported by full-length cDNA: Ceres:36633.                                                | 263867_at   | 1.5 |
| putative RNA helicase Contains DEAD-box subfamily ATP-dependent helicases protein motif                                                            | 262851_at   | 1.5 |
| hypothetical protein predicted by genemark.hmm                                                                                                     | 260872_at   | 1.5 |
| hypothetical protein similar to GB:AAB61488 [Arabidopsis thaliana];supported by full-length cDNA: Ceres:34864.                                     | 260411_at   | 1.5 |
| unknown protein                                                                                                                                    | 260276_at   | 1.5 |
| bZIP transcription factor, putative contains Pfam profile: PF00170: bZIP transcription factor; supported by cDNA: gi_15028322_gb_AY045964.1_       | 259626_at   | 1.5 |
| hypothetical protein predicted by genefinder;supported by full-length cDNA: Ceres:40090.                                                           | 258856_at   | 1.5 |
| hypothetical protein predicted by genscan+;supported by full-length cDNA: Ceres:108820.                                                            | 257985_at   | 1.5 |
| major latex protein, putative similar to major latex protein type1 GB:CAA63026 [Arabidopsis thaliana]; supported by full-length cDNA: Ceres: 8841. | 256880_at   | 1.5 |
| calreticulin (crt1) identical to calreticulin (crt1) GI:2052379 [Arabidopsis thaliana]; supported by cDNA: gi_2052378_gb_U66343.1_ATU66343         | 256216_at   | 1.5 |
| predicted protein of unknown function similar to bacterial tolB proteins but unclear if T7B11.13 is involved in viral transport                    | 255543_at   | 1.5 |
| trehalose-6-phosphate phosphatase - like protein trehalose-6-phosphate phosphatase (ATPPA), PID:g2944178                                           | 254321_at   | 1.5 |
| Expressed protein ; supported by full-length cDNA: Ceres: 28506.                                                                                   | 254190_at   | 1.5 |
| putative protein various predicted proteins, Arabidopsis thaliana                                                                                  | 254078_at   | 1.5 |
| putative DNA-binding protein AP2 domain containing protein RAP2.4 - Arabidopsis thaliana, PID:g2281633                                             | 253799_at   | 1.5 |
| putative protein                                                                                                                                   | 253317_at   | 1.5 |
| putative protein ;supported by full-length cDNA: Ceres:8161.                                                                                       | 253322_at   | 1.5 |

|                                                                                                                                                               |             |     |
|---------------------------------------------------------------------------------------------------------------------------------------------------------------|-------------|-----|
| anthranilate phosphoribosyltransferase-like protein anthranilate phosphoribosyltransferase - <i>Pisum sativum</i> , PIR:T06460; supported by cDNA: gi_14      | 251563_at   | 1.5 |
| putative protein hypothetical protein T6H20.90 - <i>Arabidopsis thaliana</i> , EMBL:AL096859; supported by cDNA: gi_16648747_gb_AY058150.1_                   | 251039_at   | 1.5 |
| putative protein similar to unknown protein (gb AAF02153.1)                                                                                                   | 248167_at   | 1.5 |
| 50S ribosomal protein L17 ;supported by full-length cDNA: Ceres:2806.                                                                                         | 247247_at   | 1.5 |
| unknown protein ;supported by full-length cDNA: Ceres:108595.                                                                                                 | 247189_at   | 1.5 |
| Cys2/His2-type zinc finger protein 1 (dbj BAA85108.1)                                                                                                         | 246993_at   | 1.5 |
| putative protein hypothetical protein T2E12.2 - <i>Arabidopsis thaliana</i> , EMBL:AC015986                                                                   | 246495_at   | 1.5 |
| heat shock transcription factor HSF4 ; supported by cDNA: gi_1619920_gb_U68017.1_ATU68017                                                                     | 246214_at   | 1.5 |
| Expressed protein ; supported by full-length cDNA: Ceres: 103171.                                                                                             | 246018_at   | 1.5 |
| predicted protein                                                                                                                                             | 245913_at   | 1.5 |
| putative protein ;supported by full-length cDNA: Ceres:42742.                                                                                                 | 245906_at   | 1.5 |
| calcineurin B-like protein 1 ; supported by cDNA: gi_3309081_gb_AF076251.1_AF076251                                                                           | 245251_at   | 1.5 |
| unknown protein                                                                                                                                               | 267518_at   | 1.4 |
| hypothetical protein predicted by genscan and genefinder, contains a Bem1/NCF1/PI3K domain (prosite:QDOC50195)                                                | 265535_at   | 1.4 |
| putative MYB family transcription factor                                                                                                                      | 265301_s_at | 1.4 |
| unknown protein Contains similarity to Rhodococcus amidase (gb D16207). ESTs gb T20504.gb H36650.gb N97423.gb H36595 come from this gen                       | 264653_at   | 1.4 |
| cyclophilin (CYP2) Same as GB: AF020434;supported by full-length cDNA: Ceres:35643.                                                                           | 264019_at   | 1.4 |
| unknown protein                                                                                                                                               | 263296_at   | 1.4 |
| splicing factor, putative similar to RSZp21 protein GB:CAA05351 GI:2582643 from [ <i>Arabidopsis thaliana</i> ] (Plant Mol. Biol. 39 (4), 761-773 (1999)); si | 263035_at   | 1.4 |
| hypothetical protein predicted by genemark.hmm;supported by full-length cDNA: Ceres:2030.                                                                     | 262159_at   | 1.4 |
| peptide transporter, putative similar to peptide transporter GI:2655098 from [ <i>Hordeum vulgare</i> ]                                                       | 261937_at   | 1.4 |
| auxin-induced protein IAA5, putative similar to auxin-induced protein IAA5 GI:972913 from [ <i>Arabidopsis thaliana</i> ]                                     | 261766_at   | 1.4 |
| unknown protein similar to hypothetical protein GB:AAF25972 GI:6714276 from [ <i>Arabidopsis thaliana</i> ]                                                   | 261702_at   | 1.4 |
| unknown protein ; supported by cDNA: gi_12083293_gb_AF332443.1_AF332443                                                                                       | 261626_at   | 1.4 |
| Expressed protein ; supported by full-length cDNA: Ceres: 5811.                                                                                               | 261535_at   | 1.4 |
| chaperonin CPN10 identical to SP:P34893 from [ <i>Arabidopsis thaliana</i> ];supported by full-length cDNA: Ceres:26943.                                      | 260714_at   | 1.4 |
| ferredoxin precursor isolog ;supported by full-length cDNA: Ceres:20637.                                                                                      | 260481_at   | 1.4 |
| protein phosphatase 2C (PP2C) identical to protein phosphatase 2C (PP2C) GB:P49598 [ <i>Arabidopsis thaliana</i> ]                                            | 259231_at   | 1.4 |
| unknown protein ; supported by full-length cDNA: Ceres: 28024.                                                                                                | 258747_at   | 1.4 |
| neutral invertase, putative similar to neutral invertase GB:CAA76145 from [ <i>Daucus carota</i> ] (Physiol. Plantarum (1999) 107, 159-165)                   | 258507_at   | 1.4 |
| ethylene responsive element binding factor 4 (AtERF4) identical to GB:BAA32421 from [ <i>Arabidopsis thaliana</i> ];supported by full-length cDNA: Ceres:2    | 257053_at   | 1.4 |
| hypothetical protein predicted by genemark.hmm                                                                                                                | 256653_at   | 1.4 |
| unknown protein ;supported by full-length cDNA: Ceres:38478.                                                                                                  | 256663_at   | 1.4 |
| transcriptional activator CBF1-like protein strong similarity to transcriptional activator CBF1, <i>Arabidopsis thaliana</i> 00                               | 254066_at   | 1.4 |
| putative protein ; supported by full-length cDNA: Ceres: 35749.                                                                                               | 253919_at   | 1.4 |
| putative DNA-binding protein DNA-binding protein WRKY3 - <i>Petroselinum crispum</i> , PIR2:S72445;supported by full-length cDNA: Ceres:11953.                | 253535_at   | 1.4 |
| putative protein several hypothetical proteins - <i>Arabidopsis thaliana</i>                                                                                  | 252475_s_at | 1.4 |
| hypothetical protein                                                                                                                                          | 252432_at   | 1.4 |
| wax synthase-like protein wax synthase - <i>Simmondsia chinensis</i> , PID:g5020219                                                                           | 252084_at   | 1.4 |
| putative protein DNAJ PROTEIN - <i>Synechococcus</i> PCC7942, EMBL:D29968; supported by cDNA: gi_16648711_gb_AY058132.1_                                      | 251263_at   | 1.4 |
| DREB2A (dbj BAA33794.1) ; supported by cDNA: gi_3738229_dbj_AB007790.1_AB007790                                                                               | 250781_at   | 1.4 |
| putative protein similar to unknown protein (emb CAB87627.1)                                                                                                  | 250018_at   | 1.4 |

|                                                                                                                                                             |             |     |
|-------------------------------------------------------------------------------------------------------------------------------------------------------------|-------------|-----|
| Expressed protein ; supported by full-length cDNA: Ceres: 18973.                                                                                            | 248904_at   | 1.4 |
| unknown protein ;supported by full-length cDNA: Ceres:31667.                                                                                                | 248710_at   | 1.4 |
| thioredoxin-like 3 ; supported by cDNA: gi_4973259_gb_AF144389.1_AF144389                                                                                   | 247524_at   | 1.4 |
| unknown protein ; supported by full-length cDNA: Ceres: 11054.                                                                                              | 247355_at   | 1.4 |
| putative protein similar to unknown protein (dbj BAA96220.1); supported by full-length cDNA: Ceres: 16835.                                                  | 247295_at   | 1.4 |
| WD repeat protein-like ;supported by full-length cDNA: Ceres:11277.                                                                                         | 247106_at   | 1.4 |
| casein kinase II alpha subunit ; supported by cDNA: gi_391602_dbj_D10246.1_ATHCK2A                                                                          | 247000_at   | 1.4 |
| putative protein FH protein interacting protein FIP1, Arabidopsis thaliana, EMBL:AF174428;supported by full-length cDNA: Ceres:19508.                       | 246034_at   | 1.4 |
| HSP like protein ; supported by cDNA: gi_15293148_gb_AY051008.1_                                                                                            | 245293_at   | 1.4 |
| hypothetical protein                                                                                                                                        | 244927_at   | 1.4 |
| orf153b orf153b                                                                                                                                             | 244923_s_at | 1.4 |
| hypothetical protein                                                                                                                                        | 257325_at   | 1.4 |
| Escherichia coli /REF=J04423 /DEF=E coli bioB gene biotin synthetase corresponding to nucleotides 2772-3004 of J04423 /LEN=1114 (-5, -M, -3 reX-r2-Ec-bioB- |             | 1.3 |
| unknown protein                                                                                                                                             | 267073_at   | 1.3 |
| putative bHLH transcription factor                                                                                                                          | 266456_at   | 1.3 |
| unknown protein                                                                                                                                             | 266188_at   | 1.3 |
| unknown protein ;supported by full-length cDNA: Ceres:123225.                                                                                               | 265626_at   | 1.3 |
| putative microtubule-associated protein ;supported by full-length cDNA: Ceres:3416.                                                                         | 265510_at   | 1.3 |
| hypothetical protein predicted by genscan and genefinder                                                                                                    | 265276_at   | 1.3 |
| Unknown protein ; supported by full-length cDNA: Ceres: 28033.                                                                                              | 264898_at   | 1.3 |
| hypothetical protein predicted by genemark.hmm                                                                                                              | 264739_at   | 1.3 |
| unknown protein similarity to stromal cell-derived factor 2, Mus musculus, PIR2:JC5105; contains EST gb:T22533, AA067386, Z18160;supported by               | 264382_at   | 1.3 |
| unknown protein similar to hypothetical protein HYP1 gb Z97338 from A. thaliana                                                                             | 264389_at   | 1.3 |
| heat-shock protein, putative similar to heat-shock protein GI:472939 from [Helianthus annuus];supported by full-length cDNA: Ceres:97415.                   | 263150_at   | 1.3 |
| hypothetical protein similar to putative protease GI:4415912 from [Arabidopsis thaliana]; supported by cDNA: gi_11993876_gb_AF329505.1_AF3295               | 261757_at   | 1.3 |
| NAC domain protein, putative similar to NAC domain protein NAM GB:AAD17313 GI:4325282 from [Arabidopsis thaliana];supported by full-length cl               | 261564_at   | 1.3 |
| hypothetical protein predicted by genemark.hmm                                                                                                              | 260656_at   | 1.3 |
| F-box protein FKF1/ADO3, AtFBX2a identical to FKF1 GI:6960305 and Adagio 3 GI:13487072 from [Arabidopsis thaliana]                                          | 259990_s_at | 1.3 |
| putative RNA-binding protein contains Pfam profile: PF00076 RNA recognition motif. (a.k.a. RRM, RBD, or RNP domain); supported by cDNA: gi_14               | 259984_at   | 1.3 |
| AP2-containing DNA-binding protein contains Pfam profile: PF00847 AP2 domain                                                                                | 259793_at   | 1.3 |
| putative DNA-binding protein similarity to short region of heat shock transcription factors: GB:CAB10177, GB:AAC31792, GB:CAA16745, GB:CAA16                | 259711_at   | 1.3 |
| hypothetical protein contains bromodomain, predicted by genscan; supported by cDNA: gi_16323116_gb_AY057662.1_                                              | 259164_at   | 1.3 |
| rotamase FKBP (ROF1) identical to rotamase FKBP (ROF1) GB:U49453 [Arabidopsis thaliana] (Mol. Gen. Genet. 252 (5), 510-517 (1996)); support                 | 257822_at   | 1.3 |
| unknown protein similar to At14a protein GB:AAD26355 GI:4589123 [Arabidopsis thaliana]; supported by cDNA: gi_16226582_gb_AF428437.1_AF4                    | 256603_at   | 1.3 |
| hypothetical protein predicted by genemark.hmm; supported by full-length cDNA: Ceres: 126401.                                                               | 256413_at   | 1.3 |
| unknown protein ;supported by full-length cDNA: Ceres:13451.                                                                                                | 256223_at   | 1.3 |
| unknown protein ;supported by full-length cDNA: Ceres:94739.                                                                                                | 256067_at   | 1.3 |
| GBF2, G-box binding factor ;supported by full-length cDNA: Ceres:16533.                                                                                     | 255625_at   | 1.3 |
| Expressed protein ; supported by cDNA: gi_4741922_gb_AF130849.1_AF130849                                                                                    | 255511_at   | 1.3 |
| protein phosphatase type 1 PP1BG ;supported by full-length cDNA: Ceres:20905.                                                                               | 254923_at   | 1.3 |
| putative protein hypothetical protein F7H19.70 - Arabidopsis thaliana, PID:e1310057                                                                         | 254848_at   | 1.3 |
| copper amine oxidase like protein (fragment2) copper amine oxidase - Cicer arietinum,PID:e1335964                                                           | 254833_s_at | 1.3 |

|                                                                                                                                                    |             |     |
|----------------------------------------------------------------------------------------------------------------------------------------------------|-------------|-----|
| putative protein hypothetical protein, chr.4, Arabidopsis thaliana, PATCHX:G2392763                                                                | 254350_at   | 1.3 |
| putative protein ; supported by full-length cDNA: Ceres: 37881.                                                                                    | 253464_at   | 1.3 |
| putative protein ;supported by full-length cDNA: Ceres:29964.                                                                                      | 253422_at   | 1.3 |
| senescence-associated protein sen1 identical to senescence-associated protein GI:1046270 from [Arabidopsis thaliana] ;supported by full-length cDI | 253161_at   | 1.3 |
| putative protein physical impedance induced protein, Zea mays, gb:AF001635                                                                         | 253113_at   | 1.3 |
| putative protein various predicted proteins, Arabidopsis thaliana                                                                                  | 252903_at   | 1.3 |
| putative protein arm repeat containing protein ARC1 -Brassica napus,PID:g2558938                                                                   | 252045_at   | 1.3 |
| putative protein zinc finger transcription factor (PEI1), Arabidopsis thaliana, EMBL:AF050463; supported by cDNA: gi_15810486_gb_AY056282.1_       | 251745_at   | 1.3 |
| putative protein ;supported by full-length cDNA: Ceres:35934.                                                                                      | 251094_at   | 1.3 |
| putative protein putative proteins - Arabidopsis thaliana; supported by cDNA: gi_15292802_gb_AY050835.1_                                           | 251084_at   | 1.3 |
| putative protein predicted proteins, Arabidopsis thaliana;supported by full-length cDNA: Ceres:2344.                                               | 250399_at   | 1.3 |
| PGPD14 protein ;supported by full-length cDNA: Ceres:41666.                                                                                        | 249862_at   | 1.3 |
| unknown protein ;supported by full-length cDNA: Ceres:25275.                                                                                       | 248709_at   | 1.3 |
| xylosidase                                                                                                                                         | 248622_at   | 1.3 |
| unknown protein                                                                                                                                    | 247992_at   | 1.3 |
| calnexin - like protein calnexin homolog, Arabidopsis thaliana, EMBL:AT08315;supported by full-length cDNA: Ceres:2869.                            | 247494_at   | 1.3 |
| nitrate transporter NTL1 - like protein nitrate transporter NTL1, Arabidopsis thaliana, EMBL:AF073361                                              | 247447_at   | 1.3 |
| putative protein contains similarity to pathogenesis-related protein;supported by full-length cDNA: Ceres:2152.                                    | 247074_at   | 1.3 |
| putative protein predicted protein, Arabidopsis thaliana                                                                                           | 246584_at   | 1.3 |
| putative protein ;supported by full-length cDNA: Ceres:13475.                                                                                      | 246225_at   | 1.3 |
| prolin-rich protein, putative similar to prolin-rich protein GI:21045 from [Phaseolus vulgaris]                                                    | 245688_at   | 1.3 |
| putative WRKY-type DNA-binding protein ; supported by cDNA: gi_13506742_gb_AF224704.1_AF224704                                                     | 245051_at   | 1.3 |
| aquaporin MIP - like protein aquaporin 2, Samanea saman, AF067185; supported by full-length cDNA: Ceres: 11929.                                    | 251858_at   | 1.3 |
| hypothetical protein predicted by grail                                                                                                            | 260275_at   | 1.2 |
| Expressed protein ; supported by full-length cDNA: Ceres: 7152.                                                                                    | 266658_at   | 1.2 |
| hypothetical protein predicted by genefinder and genscan; supported by cDNA: gi_15724241_gb_AF412061.1_AF412061                                    | 266608_at   | 1.2 |
| putative tropinone reductase                                                                                                                       | 266280_at   | 1.2 |
| protease inhibitor II ; supported by cDNA: gi_15293090_gb_AY050979.1_                                                                              | 266118_at   | 1.2 |
| hypothetical protein predicted by genefinder; supported by full-length cDNA: Ceres: 32664.                                                         | 265628_at   | 1.2 |
| unknown protein                                                                                                                                    | 265330_at   | 1.2 |
| hypothetical protein                                                                                                                               | 265237_s_at | 1.2 |
| putative prohibitin 2 B-cell receptor associated protein;supported by full-length cDNA: Ceres:6208.                                                | 265037_at   | 1.2 |
| putative 10kd chaperonin strongly similar to GB:P34893;supported by full-length cDNA: Ceres:21053.                                                 | 264895_at   | 1.2 |
| unknown protein                                                                                                                                    | 264617_at   | 1.2 |
| unknown protein ; supported by cDNA: gi_13265448_gb_AF324676.2_AF324676                                                                            | 263881_at   | 1.2 |
| hypothetical protein predicted by genemark.hmm                                                                                                     | 262901_at   | 1.2 |
| unknown protein ;supported by full-length cDNA: Ceres:93312.                                                                                       | 262607_at   | 1.2 |
| unknown protein ;supported by full-length cDNA: Ceres:8932.                                                                                        | 262313_at   | 1.2 |
| putative RING zinc finger protein contains Pfam profile: PF00097 Zinc finger, C3HC4 type (RING finger);supported by full-length cDNA: Ceres:9668;  | 262167_at   | 1.2 |
| Expressed protein ; supported by full-length cDNA: Ceres: 40238.                                                                                   | 261756_at   | 1.2 |
| hypothetical protein predicted by genemark.hmm                                                                                                     | 261524_at   | 1.2 |
| Expressed protein ; supported by cDNA: gi_13926326_gb_AF372912.1_AF372912                                                                          | 261272_at   | 1.2 |

|                                                                                                                                                 |           |     |
|-------------------------------------------------------------------------------------------------------------------------------------------------|-----------|-----|
| hypothetical protein similar to putative MYB family transcription factor GB:AAD17429 GI:4335752 from [Arabidopsis thaliana]                     | 260999_at | 1.2 |
| hypothetical protein contains similarity to guanine nucleotide exchange factor, eIF-2B, delta subunit GI:529428 from [Mus musculus]             | 260756_at | 1.2 |
| Expressed protein ; supported by full-length cDNA: Ceres: 21834.                                                                                | 260768_at | 1.2 |
| putative sulfate transporter contains Pfam profile: PF00916 sulfate transporter family;supported by full-length cDNA: Ceres:120095.             | 260302_at | 1.2 |
| putative protein kinase contains Pfam profile: PF00069 Eukaryotic protein kinase domain                                                         | 260206_at | 1.2 |
| unknown protein ;supported by full-length cDNA: Ceres:270659.                                                                                   | 260025_at | 1.2 |
| unknown protein                                                                                                                                 | 259942_at | 1.2 |
| RING-H2 zinc finger protein ATL3, putative similar to GI:4928397 from [Arabidopsis thaliana] (Plant Mol. Biol. 40 (4), 579-590 (1999))          | 259854_at | 1.2 |
| unknown protein Pfam HMM hit: EF hand                                                                                                           | 259137_at | 1.2 |
| unknown protein ; supported by full-length cDNA: Ceres: 118261.                                                                                 | 258879_at | 1.2 |
| putative beta-1,3-glucanase similar to beta-1,3-glucanase GB:S12402 [Nicotiana sp], GB:CAA03908 [Citrus sinensis], GB:S44364 [Lycopersicon es   | 258805_at | 1.2 |
| unknown protein                                                                                                                                 | 258699_at | 1.2 |
| putative shikimate kinase similar to shikimate kinase precursor GB:CAA45121 [Lycopersicon esculentum]                                           | 258281_at | 1.2 |
| unknown protein ; supported by cDNA: gi_15529233_gb_AY052241.1_                                                                                 | 258225_at | 1.2 |
| unknown protein                                                                                                                                 | 256763_at | 1.2 |
| Sm-like protein contains Pfam profile: PF01423: Sm protein; supported by full-length cDNA: Ceres: 23170.                                        | 256333_at | 1.2 |
| Expressed protein ; supported by full-length cDNA: Ceres: 31945.                                                                                | 256159_at | 1.2 |
| putative protein contains similarity to pseudouridine synthases; supported by cDNA: gi_13430549_gb_AF360187.1_AF360187                          | 255985_at | 1.2 |
| mitochondrial inner membrane translocase component, putative similar to mitochondrial inner membrane translocase component Tim17a GI:437852     | 255941_at | 1.2 |
| Expressed protein ; supported by cDNA: gi_15010591_gb_AY045597.1_                                                                               | 255793_at | 1.2 |
| putative protein hypothetical proteins Arabidopsis thaliana;supported by full-length cDNA: Ceres:12923.                                         | 254787_at | 1.2 |
| putative protein AR411 - Arabidopsis thaliana (thale cress), PID:g1669603; supported by cDNA: gi_13507100_gb_AF272748.1_AF272748                | 254231_at | 1.2 |
| putative DNA-binding protein DNA-binding protein WRKY3 - Petroselinum crispum,PIR2:S72445;supported by full-length cDNA: Ceres:112528.          | 254159_at | 1.2 |
| hypothetical protein ; supported by cDNA: gi_15028324_gb_AY045965.1_                                                                            | 253391_at | 1.2 |
| RING-H2 finger protein RHA3b ;supported by full-length cDNA: Ceres:31493.                                                                       | 253140_at | 1.2 |
| putative protein various predicted proteins, Arabidopsis thaliana                                                                               | 252901_at | 1.2 |
| putative protein ; supported by full-length cDNA: Ceres: 40302.                                                                                 | 252234_at | 1.2 |
| hypothetical protein ;supported by full-length cDNA: Ceres:101230.                                                                              | 251925_at | 1.2 |
| putative protein MtN24, Medicago truncatula, EMBL:MTY15290;supported by full-length cDNA: Ceres:6434.                                           | 251795_at | 1.2 |
| putative protein ; supported by cDNA: gi_14326524_gb_AF385716.1_AF385716                                                                        | 250896_at | 1.2 |
| (3R)-hydroxymyristoyl-[acyl carrier protein] dehydratase -like protein beta-hydroxyacyl-ACP dehydratase precursor, Toxoplasma gondii, EMBL:AF06 | 250470_at | 1.2 |
| separation anxiety protein - like separation anxiety protein, Drosophila melanogaster, EMBL:AF225902                                            | 250390_at | 1.2 |
| putative protein predicted proteins, Schizosaccharomyces pombe                                                                                  | 250281_at | 1.2 |
| chloroplast GrpE protein ; supported by cDNA: gi_13878046_gb_AF370286.1_AF370286                                                                | 250061_at | 1.2 |
| acetyl-CoA synthetase-like protein                                                                                                              | 249869_at | 1.2 |
| thaumatin-like protein thaumatin-like protein - Arabidopsis thaliana, PIR:S71175                                                                | 249439_at | 1.2 |
| RING finger -like protein RING-H2 zinc finger protein ATL4, Arabidopsis thaliana, EMBL:AF132014                                                 | 249398_at | 1.2 |
| putative protein contains similarity to bZIP transcription factor;supported by full-length cDNA: Ceres:43004.                                   | 248606_at | 1.2 |
| unknown protein ;supported by full-length cDNA: Ceres:92267.                                                                                    | 248445_at | 1.2 |
| putative protein similar to unknown protein (gb AAB68039.1);supported by full-length cDNA: Ceres:1076.                                          | 248432_at | 1.2 |
| putative protein embryo-specific protein 3, Arabidopsis thaliana, PIR:T48490                                                                    | 247459_at | 1.2 |
| MYB96 transcription factor-like protein ; supported by cDNA: gi_5823334_gb_AF176001.1_AF176001                                                  | 247455_at | 1.2 |

|                                                                                                                                                        |             |     |
|--------------------------------------------------------------------------------------------------------------------------------------------------------|-------------|-----|
| putative protein contains similarity to unknown protein (gb AAC17084.1); supported by cDNA: gi_14596230_gb_AY042903.1_                                 | 247047_at   | 1.2 |
| glutaredoxin, putative similar to glutaredoxin GI:1732424 from [Ricinus communis]                                                                      | 246384_at   | 1.2 |
| hypothetical protein ;supported by full-length cDNA: Ceres:38657.                                                                                      | 245893_at   | 1.2 |
| hypothetical protein similar to hypothetical protein GB:CAB77775 GI:7269775 from [Arabidopsis thaliana]                                                | 245789_at   | 1.2 |
| putative protein contains EST gb:T4504800                                                                                                              | 245229_at   | 1.2 |
| hypothetical protein                                                                                                                                   | 257336_at   | 1.2 |
| unknown protein                                                                                                                                        | 267406_at   | 1.1 |
| putative anthocyanin 5-aromatic acyltransferase ; supported by cDNA: gi_13937225_gb_AF372968.1_AF372968                                                | 267337_at   | 1.1 |
| unknown protein ;supported by full-length cDNA: Ceres:9284.                                                                                            | 267261_at   | 1.1 |
| unknown protein ; supported by full-length cDNA: Ceres: 28529.                                                                                         | 267178_at   | 1.1 |
| similar to Mlo proteins from H. vulgare ; supported by cDNA: gi_14091593_gb_AF369573.1_AF369573                                                        | 266992_at   | 1.1 |
| putative zinc transporter ;supported by full-length cDNA: Ceres:207558.                                                                                | 266718_at   | 1.1 |
| hypothetical protein predicted by genscan                                                                                                              | 266707_at   | 1.1 |
| unknown protein                                                                                                                                        | 266005_at   | 1.1 |
| unknown protein ;supported by full-length cDNA: Ceres:19338.                                                                                           | 265895_at   | 1.1 |
| putative auxin-regulated protein                                                                                                                       | 265806_at   | 1.1 |
| unknown protein ; supported by cDNA: gi_13877764_gb_AF370145.1_AF370145                                                                                | 264989_at   | 1.1 |
| unknown protein                                                                                                                                        | 264909_at   | 1.1 |
| putative elongation factor similar to GB:AAC67357                                                                                                      | 264664_at   | 1.1 |
| unknown protein similar to EST gb AA650671 and gb T20610                                                                                               | 264488_s_at | 1.1 |
| hypothetical protein predicted by genscan+                                                                                                             | 264491_at   | 1.1 |
| hypothetical protein similar to transcriptional repressor NF-X1 in Homo sapiens (sp Q12986 NFX1_HUMAN); similar to EST gb T21002                       | 264460_at   | 1.1 |
| unknown protein similar to EST gb AA598098;supported by full-length cDNA: Ceres:23916.                                                                 | 264467_at   | 1.1 |
| hypothetical protein contains non-consensus donor splice site AT at exon 4 and acceptor splice site at exon5;Contains similarity to serine/threonine p | 264331_at   | 1.1 |
| symbiosis-related protein, putative similar to symbiosis-related protein GI:2072022 from [Laccaria bicolor];supported by full-length cDNA: Ceres:191   | 264285_at   | 1.1 |
| putative mitochondrial dicarboxylate carrier protein ;supported by full-length cDNA: Ceres:20723.                                                      | 264000_at   | 1.1 |
| glycine-rich RNA binding protein 7 Alternative splicing exists based on EST evidence, form 1 splice site is AG , form 2 splice site is AT              | 263548_at   | 1.1 |
| putative heat shock protein ; supported by cDNA: gi_15450722_gb_AY053403.1_                                                                            | 263483_at   | 1.1 |
| hypothetical protein predicted by genemark.hmm;supported by full-length cDNA: Ceres:94743.                                                             | 263151_at   | 1.1 |
| putative glutamate/aspartate-binding peptide Belongs to the PF 01027 Uncharacterized protein family UPF0005 with 7 transmembrane domains               | 263164_at   | 1.1 |
| DNA-binding protein similar to cellular nucleic acid binding protein GB:CAA45345 GI:50471 from [Mus musculus]; supported by full-length cDNA: Ce       | 262948_at   | 1.1 |
| hypothetical protein predicted by genscan+                                                                                                             | 262719_at   | 1.1 |
| hypothetical protein similar to hypothetical protein GB:AAD50049 GI:5734784 from [Arabidopsis thaliana]                                                | 262459_at   | 1.1 |
| transcription factor, putative similar to Transcription factor GB:CAA74053 GI:2398533 from [Arabidopsis thaliana];supported by full-length cDNA: Ce    | 262098_at   | 1.1 |
| hypothetical protein predicted by genscan+                                                                                                             | 262067_at   | 1.1 |
| methionine/cystathionine gamma lyase, putative similar to methionine gamma-lyase GB:CAA04124.1 GI:2330885 from [Trichomonas vaginalis]; sup            | 261957_at   | 1.1 |
| type 2 peroxiredoxin, putative similar to type 2 peroxiredoxin GI:4928472 from [Brassica rapa subsp. pekinensis];supported by full-length cDNA: Cer    | 261919_at   | 1.1 |
| chloroplast drought-induced stress protein, putative similar to chloroplast drought-induced stress protein GI:2582821 from [Solanum tuberosum];sup     | 261751_at   | 1.1 |
| unknown protein                                                                                                                                        | 261558_at   | 1.1 |
| AP2 domain containing protein, putative similar to AP2 domain containing protein RAP2.5 GI:2281635 from (Arabidopsis thaliana); supported by cDI       | 261315_at   | 1.1 |
| defensin AMP1, putative similar to PIR:S66219 from [Clitoria ternatea]                                                                                 | 261135_at   | 1.1 |
| ribokinase, putative similar to GB:AAD00536 from [Pyrobaculum aerophilum]                                                                              | 261136_at   | 1.1 |



|                                                                                                                                                  |             |     |
|--------------------------------------------------------------------------------------------------------------------------------------------------|-------------|-----|
| hypothetical protein predicted by genscan+, contains Viral RNA helicase domain                                                                   | 260283_at   | 1.1 |
| unknown protein similar to putative protein GB:CAB38899 [Arabidopsis thaliana]                                                                   | 260055_at   | 1.1 |
| unknown protein ; supported by cDNA: gi_15809819_gb_AY054177.1_                                                                                  | 259792_at   | 1.1 |
| CONSTANS family zinc finger protein, putative contains Pfam profile: PF01760: CONSTANS family zinc finger; supported by cDNA: gi_14335053_g      | 259595_at   | 1.1 |
| hypothetical protein                                                                                                                             | 259570_at   | 1.1 |
| unknown protein similar to zinc finger protein GB:BAA33206 [Oryza sativa]                                                                        | 259244_at   | 1.1 |
| RNA helicase, DRH1 identical to RNA helicase DRH1 GB:BAA28347 [Arabidopsis thaliana]; supported by cDNA: gi_15215693_gb_AY050375.1_              | 259194_at   | 1.1 |
| unknown protein similar to CGI-86 protein GB:AAD34081 [Homo sapiens], HMM hit: Alcohol/other dehydrogenases, short chain type                    | 259051_at   | 1.1 |
| unknown protein ; supported by cDNA: gi_15809941_gb_AY054239.1_                                                                                  | 259057_at   | 1.1 |
| NAM-like protein (no apical meristem) similar to NAM GB:CAA63101 [Petunia x hybrida]; supported by full-length cDNA: Ceres: 119460.              | 258813_at   | 1.1 |
| putative auxin-resistance protein, AXR1 similar to GB:P42744 from [Arabidopsis thaliana]                                                         | 258073_at   | 1.1 |
| hypothetical protein predicted by genemark.hmm                                                                                                   | 257724_at   | 1.1 |
| Expressed protein ; supported by full-length cDNA: Ceres: 262289.                                                                                | 257312_at   | 1.1 |
| unknown protein ; supported by cDNA: gi_15081754_gb_AY048270.1_                                                                                  | 257153_at   | 1.1 |
| unknown protein ; supported by cDNA: gi_15146182_gb_AY049232.1_                                                                                  | 257154_at   | 1.1 |
| unknown protein                                                                                                                                  | 256940_at   | 1.1 |
| hypothetical protein predicted by genefinder, similar to GP 1301832 gn PID e239862 Z71287                                                        | 256715_at   | 1.1 |
| plastid protein, putative similar to GI:2246378 from [Arabidopsis thaliana] (Proc. Natl. Acad. Sci. U.S.A. 94 (23), 12722-12727 (1997))          | 256466_at   | 1.1 |
| putative small nuclear ribonucleoprotein U2B ;supported by full-length cDNA: Ceres:34995.                                                        | 255871_at   | 1.1 |
| unknown protein similar to unknown protein GI:6714347 from [Arabidopsis thaliana];supported by full-length cDNA: Ceres:103226.                   | 255733_at   | 1.1 |
| putative hypersensitive response protein similar to N. tabacum hin1, GenBank accession number Y07563;supported by full-length cDNA: Ceres:29     | 255577_at   | 1.1 |
| putative protein                                                                                                                                 | 255134_at   | 1.1 |
| zinc-finger protein Lsd1 ;supported by full-length cDNA: Ceres:38456.                                                                            | 254477_at   | 1.1 |
| protein-methionine-S-oxide reductase ;supported by full-length cDNA: Ceres:36536.                                                                | 254099_at   | 1.1 |
| putative ribosomal protein ribosomal protein L31, Nicotiana glutinosa, U23784;supported by full-length cDNA: Ceres:14013.                        | 254012_at   | 1.1 |
| glycine-rich protein like glycine-rich protein 5 - Arabidopsis thaliana, PIR2:JQ1064; supported by full-length cDNA: Ceres: 33435.               | 253754_at   | 1.1 |
| putative protein (fragment)                                                                                                                      | 253238_at   | 1.1 |
| putative protein                                                                                                                                 | 252539_at   | 1.1 |
| response reactor 2 (ATRR2) ; supported by cDNA: gi_3273197_dbj_AB010916.1_AB010916                                                               | 252374_at   | 1.1 |
| putative protein                                                                                                                                 | 251917_at   | 1.1 |
| putative protein leucine zipper-EF-hand containing transmembrane protein 1 - Mus musculus, EMBL:AF061026                                         | 251432_at   | 1.1 |
| putative protein RING finger protein AO7, Mus musculus, EMBL:AF171060                                                                            | 251403_at   | 1.1 |
| putative protein several protein kinases - different species                                                                                     | 251068_at   | 1.1 |
| I-box binding factor - like protein I-box binding factor (LeMYBI gene), Lycopersicon esculentum, EMBL:LES243339;supported by full-length cDNA: C | 250858_at   | 1.1 |
| putative protein                                                                                                                                 | 250158_at   | 1.1 |
| hypothetical protein                                                                                                                             | 249990_at   | 1.1 |
| CALMODULIN-RELATED PROTEIN 2, TOUCH-INDUCED (TCH2) ;supported by full-length cDNA: Ceres:25475.                                                  | 249583_at   | 1.1 |
| protein kinase - like protein protein kinase ATN1, Arabidopsis thaliana, PIR:S61766                                                              | 249361_at   | 1.1 |
| 2-oxoglutarate/malate translocator ; supported by cDNA: gi_15028072_gb_AY045893.1_                                                               | 247286_at   | 1.1 |
| COP1-interacting protein CIP8 ; supported by cDNA: gi_5929905_gb_AF162150.1_AF162150                                                             | 247219_at   | 1.1 |
| hypothetical protein ;supported by full-length cDNA: Ceres:96001.                                                                                | 246442_at   | 1.1 |
| hypothetical protein contains similarity to cockayne syndrome complementation group A protein GB:U28413 GI:975301 from [Homo sapiens]            | 245764_s_at | 1.1 |

|                                                                                                                                                   |           |     |
|---------------------------------------------------------------------------------------------------------------------------------------------------|-----------|-----|
| hypothetical protein predicted by genemark.hmm                                                                                                    | 245659_at | 1.1 |
| Expressed protein ; supported by cDNA: gi_13877886_gb_AF370206.1_AF370206                                                                         | 245261_at | 1.1 |
| Expressed protein ; supported by cDNA: gi_15810220_gb_AY056149.1_                                                                                 | 264512_at | 1.1 |
| hypothetical protein                                                                                                                              | 257317_at | 1.1 |
| hypothetical protein predicted by genemark.hmm                                                                                                    | 260935_at | 1   |
| hypothetical protein predicted by genscan+;supported by full-length cDNA: Ceres:101876.                                                           | 258878_at | 1   |
| UDP-glucose glucosyltransferase, putative similar to UDP-glucose glucosyltransferase GI:3928543 from [Arabidopsis thaliana]; supported by cDNA:   | 255943_at | 1   |
| unknown protein similar to GP 2262147 AC002330                                                                                                    | 267628_at | 1   |
| Expressed protein ; supported by full-length cDNA: Ceres: 27620.                                                                                  | 267591_at | 1   |
| putative small nuclear ribonucleoprotein Prp4p                                                                                                    | 267102_at | 1   |
| Expressed protein ; supported by full-length cDNA: Ceres: 42237.                                                                                  | 266886_at | 1   |
| unknown protein ;supported by full-length cDNA: Ceres:35872.                                                                                      | 266806_at | 1   |
| putative non-LTR retroelement reverse transcriptase                                                                                               | 266786_at | 1   |
| putative protein kinase contains a protein kinase domain profile (PDOC00100)                                                                      | 266749_at | 1   |
| hypothetical protein predicted by genefinder                                                                                                      | 266545_at | 1   |
| unknown protein                                                                                                                                   | 266189_at | 1   |
| putative microtubule-associated protein ; supported by cDNA: gi_15724331_gb_AF412106.1_AF412106                                                   | 266106_at | 1   |
| putative senescence-associated protein 5 contains a transmembrane 4 family signature; rare (GC) splice donor consensus found instead of (GT) at i | 265935_at | 1   |
| hypothetical protein predicted by genscan                                                                                                         | 265849_at | 1   |
| predicted by genscan and genefinder ;supported by full-length cDNA: Ceres:120459.                                                                 | 265732_at | 1   |
| putative arginine/serine-rich splicing factor                                                                                                     | 265449_at | 1   |
| unknown protein                                                                                                                                   | 265451_at | 1   |
| putative WD-40 repeat protein similar to TUP1(GB:AF079369); supported by cDNA: gi_13605894_gb_AF367346.1_AF367346                                 | 265259_at | 1   |
| carboxyphosphoenolpyruvate mutase, putative similar to carboxyphosphoenolpyruvate mutase GI:47149 from [Streptomyces hygrosopicus];s              | 264954_at | 1   |
| hypothetical protein ;supported by full-length cDNA: Ceres:250028.                                                                                | 264870_at | 1   |
| gamma glutamyl hydrolase, putative similar to gamma glutamyl hydrolase GI:1680711 from [Glycine max];supported by full-length cDNA: Ceres:413     | 264300_at | 1   |
| hypothetical protein ;supported by full-length cDNA: Ceres:123727.                                                                                | 263946_at | 1   |
| unknown protein ;supported by full-length cDNA: Ceres:12251.                                                                                      | 263931_at | 1   |
| putative cis-Golgi SNARE protein ;supported by full-length cDNA: Ceres:2416.                                                                      | 263839_at | 1   |
| putative acetolactate synthase                                                                                                                    | 263460_at | 1   |
| hypothetical protein predicted by genefinder; supported by cDNA: gi_14423545_gb_AF387010.1_AF387010                                               | 263075_at | 1   |
| hypothetical protein ;supported by full-length cDNA: Ceres:30113.                                                                                 | 262929_at | 1   |
| FtsH protease, putative contains similarity to chloroplast FtsH protease GI:5804782 from [Nicotiana tabacum]                                      | 262937_at | 1   |
| membrane related protein CP5, putative similar to membrane related protein CP5 GI:4741929 from [Arabidopsis thaliana]; supported by cDNA: gi_4    | 262884_at | 1   |
| unknown protein similar to pectinesterase GB:X85216 GI:732912 [Phaseolus vulgaris];supported by full-length cDNA: Ceres:33355.                    | 262844_at | 1   |
| unknown protein Location of ESTs 152C14T7 , gb T88012, 173P7T7 , gb H36502 and 107E18T7 , gb T22775;supported by full-length cDNA: Ceres          | 262803_at | 1   |
| unknown protein                                                                                                                                   | 262677_at | 1   |
| Expressed protein ; supported by full-length cDNA: Ceres: 17598.                                                                                  | 262226_at | 1   |
| putative ubiquinol-cytochrome c reductase similar to ubiquinol-cytochrome c reductase GB:P48504 from [Solanum tuberosum]; supported by cDNA:      | 262206_at | 1   |
| mRNA export protein, putative similar to mRNA export protein GB:AAC28126 GI:1903456 from [Homo sapiens];supported by full-length cDNA: Cer        | 261896_at | 1   |
| unknown protein                                                                                                                                   | 261545_at | 1   |
| actin capping protein beta-2, putative similar to actin capping protein beta-2 GB:U07826 GI:565063 from [Gallus gallus]                           | 261512_at | 1   |

|                                                                                                                                                           |           |   |
|-----------------------------------------------------------------------------------------------------------------------------------------------------------|-----------|---|
| unknown protein ; supported by cDNA: gi_15292702_gb_AY050785.1_                                                                                           | 261293_at | 1 |
| unknown protein ; supported by cDNA: gi_15450466_gb_AY052334.1_                                                                                           | 261209_at | 1 |
| flavonol 3-o-glucosyltransferase, putative similar to flavonol 3-o-glucosyltransferase GB:Q40287 from [Manihot esculenta]                                 | 261048_at | 1 |
| unknown protein ; supported by cDNA: gi_15028364_gb_AY045985.1_                                                                                           | 261019_at | 1 |
| F-box protein family contains similarity to F-box protein FBX3 GI:6103643 from [Homo sapiens]                                                             | 260949_at | 1 |
| RNA recognition motif-containing protein SEB-4 similar to RNA recognition motif-containing protein SEB-4 GI:8895698 from [Xenopus laevis];suppor          | 260806_at | 1 |
| putative protein kinase similar to protein kinase APK1A GB:Q06548 [Arabidopsis thaliana]; contains Pfam profile: PF00069 Eukaryotic protein kinase        | 260415_at | 1 |
| hypothetical protein predicted by genscan+; supported by cDNA: gi_14335049_gb_AY037204.1_                                                                 | 260310_at | 1 |
| hypothetical protein similar to putative protein GB:CAA18164 [Arabidopsis thaliana]; supported by cDNA: gi_13878144_gb_AF370335.1_AF370335                | 260243_at | 1 |
| unknown protein                                                                                                                                           | 260155_at | 1 |
| 60S ribosomal protein L18A, putative similar to GI:3128228 from [Arabidopsis thaliana] (Nature 402 (6763), 761-768 (1999));supported by full-length       | 260026_at | 1 |
| hypothetical protein ;supported by full-length cDNA: Ceres:147838.                                                                                        | 259976_at | 1 |
| unknown protein                                                                                                                                           | 259934_at | 1 |
| putative thioredoxin similar to protein disulfide isomerase precursor GB:P29828 [Medicago sativa]; Pfam HMM hit: Thioredoxins                             | 259757_at | 1 |
| hypothetical protein contains similarity to myosin heavy chain cardiac muscle specific isoform 1 GI:7416982 from (Argopecten irradians); supported b      | 259659_at | 1 |
| hypothetical protein predicted by genscan;supported by full-length cDNA: Ceres:18207.                                                                     | 259235_at | 1 |
| unknown protein ;supported by full-length cDNA: Ceres:102038.                                                                                             | 259184_at | 1 |
| putative D-ribulose-5-phosphate 3-epimerase similar to D-ribulose-5-phosphate 3-epimerase GB:AAF01048 [Oryza sativa]; contains non-consensus              | 258999_at | 1 |
| E2, ubiquitin-conjugating enzyme 11 (UBC11) identical to gi:12643427, SP:P35134;supported by full-length cDNA: Ceres:21455.                               | 258678_at | 1 |
| unknown protein ;supported by full-length cDNA: Ceres:35949.                                                                                              | 258608_at | 1 |
| hypothetical protein similar to receptor protein kinases: GB:CAB43834, GB:S71277 [Arabidopsis thaliana]                                                   | 258557_at | 1 |
| unknown protein                                                                                                                                           | 258364_at | 1 |
| unknown protein                                                                                                                                           | 258282_at | 1 |
| ethylene responsive element binding factor, putative similar to GB:BAA32420 from [Arabidopsis thaliana], contains Pfam profile: PF00847 P2 domai          | 257675_at | 1 |
| DNA-binding protein, putative similar to GB:AAF32491 from [Triticum aestivum] (Mol. Cell. Biol. 19 (12), 8113-8122 (1999))                                | 257291_at | 1 |
| prohibitin, putative similar to prohibitin GB:AAC49691 from [Arabidopsis thaliana] (Plant Mol. Biol. (1997) 33 (4), 753-756);supported by full-length cl  | 257149_at | 1 |
| unknown protein contains similarity to plastid protein GB:AAB80660 from [Arabidopsis thaliana], contains Pfam profile: PF00076 RNA recognition m          | 256805_at | 1 |
| unknown protein ; supported by cDNA: gi_14194136_gb_AF367274.1_AF367274                                                                                   | 256343_at | 1 |
| unknown protein ; supported by cDNA: gi_13358195_gb_AF325003.2_AF325003                                                                                   | 256114_at | 1 |
| hypothetical protein contains similarity to photoperiod sensitivity quantitative trait locus (Hd1) GI:11094203 from [Oryza sativa];supported by full-leng | 256060_at | 1 |
| unknown protein ;supported by full-length cDNA: Ceres:38751.                                                                                              | 256017_at | 1 |
| putative SWI/SNF complex subunit SW13                                                                                                                     | 255846_at | 1 |
| predicted OR23 protein of unknown function                                                                                                                | 255469_at | 1 |
| putative protein predicted protein W02G9.1 Caenorhabditis elegans cosmid W02G9, PID:g3165571; supported by cDNA: gi_15450340_gb_AY0522                    | 254863_at | 1 |
| putative protein                                                                                                                                          | 254795_at | 1 |
| hypothetical protein ; supported by full-length cDNA: Ceres: 14794.                                                                                       | 254626_at | 1 |
| Expressed protein ; supported by full-length cDNA: Ceres: 16643.                                                                                          | 254388_at | 1 |
| hypothetical protein ;supported by full-length cDNA: Ceres:6848.                                                                                          | 254356_at | 1 |
| water channel - like protein plasma membrane intrinsic protein 1c, Arabidopsis thaliana, PIR2:S44083;supported by full-length cDNA: Ceres:3982.           | 254239_at | 1 |
| HSP90-like protein HSP90 homolog - Catharanthus roseus, PIR2:S39558; supported by cDNA: gi_14532541_gb_AY039895.1_                                        | 254166_at | 1 |
| receptor kinase-like protein receptor-like protein kinase, RLK3 - Arabidopsis thaliana,PID:e1363211                                                       | 254063_at | 1 |
| Expressed protein ; supported by full-length cDNA: Ceres: 9546.                                                                                           | 254041_at | 1 |

|                                                                                                                                             |             |   |
|---------------------------------------------------------------------------------------------------------------------------------------------|-------------|---|
| hypothetical protein                                                                                                                        | 253796_at   | 1 |
| SOF1 protein-like protein SOF1 (involved in rRNA processing) protein-yeast; supported by cDNA: gi_13937178_gb_AF372943.1_AF372943           | 253777_at   | 1 |
| glycine-rich protein glycine-rich cell wall structural protein - garden petunia,Pir2:A26099                                                 | 253619_at   | 1 |
| ribosomal protein L11 homolog several ribosomal proteins L11;supported by full-length cDNA: Ceres:95636.                                    | 253138_at   | 1 |
| putative protein hypothetical protein HI0722 (pepQ 5 region) -E.coli,PID:g1790283;supported by full-length cDNA: Ceres:18344.               | 253007_at   | 1 |
| Expressed protein ; supported by cDNA: gi_15451093_gb_AY054627.1_                                                                           | 253001_at   | 1 |
| putative protein NADH dehydrogenase subunit 1, Lymantria dispar albescens, EMBL:AF075286;supported by full-length cDNA: Ceres:36750.        | 252091_at   | 1 |
| putative protein various predicted proteins, C. elegans, Homo sapiens and yeast;supported by full-length cDNA: Ceres:36721.                 | 252064_at   | 1 |
| putative protein hin1 protein, Nicotiana tabacum, PIR:T03265;supported by full-length cDNA: Ceres:1678.                                     | 251879_at   | 1 |
| putative protein GTP-binding regulatory protein beta chain, Dictyostelium discoideum, PIR:A47370; supported by cDNA: gi_13430701_gb_AF36026 | 251888_at   | 1 |
| beta-1,3-glucanase - like protein probable beta-1,3-glucanase, Triticum aestivum, PIR:T06268; supported by full-length cDNA: Ceres: 8980.   | 251804_at   | 1 |
| putative protein CND41, chloroplast nucleoid DNA binding protein - Nicotiana tabacum, EMBL:D26015; supported by cDNA: gi_15983375_gb_AF42   | 251507_at   | 1 |
| RING-H2 zinc finger protein ATL4 ; supported by cDNA: gi_4928398_gb_AF132014.1_AF132014                                                     | 251412_at   | 1 |
| putative protein HIRA interacting protein 4 (dnaJ-like) - Homo sapiens, EMBL:AJ001309;supported by full-length cDNA: Ceres:37292.           | 251182_at   | 1 |
| putative protein Myb-related transcriptional activator mybSt1, Solanum tuberosum, EMBL:S74753                                               | 251132_at   | 1 |
| putative protein various predicted proteins, Arabidopsis thaliana                                                                           | 250965_at   | 1 |
| Expressed protein ; supported by full-length cDNA: Ceres: 12197.                                                                            | 250921_at   | 1 |
| putative protein                                                                                                                            | 250572_at   | 1 |
| putative protein HSPC184, Homo sapiens, EMBL:AF151018; supported by cDNA: gi_14335059_gb_AY037209.1_                                        | 250401_at   | 1 |
| GASA4 ; supported by cDNA: gi_950098_gb_U15683.1_ATU15683                                                                                   | 250109_at   | 1 |
| ribosomal protein L33 - like ribosomal protein L33, Rickettsia prowazekii, PIR:E71650                                                       | 249975_s_at | 1 |
| NAM (no apical meristem)-like protein ; supported by cDNA: gi_14326464_gb_AF385685.1_AF385685                                               | 249944_at   | 1 |
| putative protein similar to unknown protein (gb AAF19669.1)                                                                                 | 249253_at   | 1 |
| unknown protein                                                                                                                             | 249134_at   | 1 |
| GDSL-motif lipase/hydrolase-like protein ;supported by full-length cDNA: Ceres:18389.                                                       | 248912_at   | 1 |
| putative protein contains similarity to S-ribonuclease binding protein                                                                      | 248819_at   | 1 |
| putative protein strong similarity to unknown protein (pir T09376)                                                                          | 248630_at   | 1 |
| putative protein strong similarity to unknown protein (gb AAB95234.1)                                                                       | 248502_at   | 1 |
| protein translocation complex Sec61 gamma chain (pir  T05513) ; supported by cDNA: gi_13877812_gb_AF370169.1_AF370169                       | 248512_at   | 1 |
| HCF106 (gb AAD32652.1) ; supported by cDNA: gi_4894913_gb_AF139188.1_AF139188                                                               | 248338_at   | 1 |
| homogentisate 1,2-dioxygenase ;supported by full-length cDNA: Ceres:6599.                                                                   | 248193_at   | 1 |
| putative protein similar to unknown protein (gb AAD50013.1)                                                                                 | 248140_at   | 1 |
| unknown protein ;supported by full-length cDNA: Ceres:21044.                                                                                | 247990_at   | 1 |
| Expressed protein ; supported by full-length cDNA: Ceres: 22388.                                                                            | 247865_at   | 1 |
| beta-1,3 glucanase - like protein beta-1,3 glucanase, Populus alba x Populus tremula, EMBL:AF230109                                         | 247845_at   | 1 |
| pseudo-response regulator 1 ; supported by cDNA: gi_7576353_dbj_AB041530.1_AB041530                                                         | 247525_at   | 1 |
| putative protein contains similarity to NAC-domain protein;supported by full-length cDNA: Ceres:6637.                                       | 247351_at   | 1 |
| putative protein contains similarity to unknown protein (pir T05568)                                                                        | 247182_at   | 1 |
| putative protein contains similarity to unknown protein (sp Q10058);supported by full-length cDNA: Ceres:108335.                            | 246985_at   | 1 |
| hypothetical protein predicted by genemark.hmm                                                                                              | 246630_at   | 1 |
| putative protein predicted protein At2g41010 - Arabidopsis thaliana, EMBL:AC004261;supported by full-length cDNA: Ceres:39584.              | 246289_at   | 1 |
| putative protein ; supported by cDNA: gi_11245493_gb_AF319540.1_AF319540                                                                    | 246212_at   | 1 |

|                                                                                                                                                   |             |     |
|---------------------------------------------------------------------------------------------------------------------------------------------------|-------------|-----|
| putative protein phi-1 - Nicotiana tabacum, EMBL:AB018441;supported by full-length cDNA: Ceres:38576.                                             | 245885_at   | 1   |
| disease resistance protein RPS4, putative similar to disease resistance protein RPS4 GI:9759605 from [Arabidopsis thaliana]                       | 245826_at   | 1   |
| hypothetical protein predicted by genemark.hmm;supported by full-length cDNA: Ceres:124269.                                                       | 245840_at   | 1   |
| RNA-binding glycine-rich protein, putative similar to RNA-binding glycine-rich protein (RGP-1a) GI:436789 from [Nicotiana sylvestris]             | 245778_at   | 1   |
| hypothetical protein predicted by genemark.hmm                                                                                                    | 245662_at   | 1   |
| Expressed protein ; supported by full-length cDNA: Ceres: 6580.                                                                                   | 245336_at   | 1   |
| putative protein disulfide-isomerase                                                                                                              | 245175_at   | 1   |
| photolyase/blue-light receptor (PHR2) ;supported by full-length cDNA: Ceres:34800.                                                                | 245150_at   | 1   |
| hypothetical protein                                                                                                                              | 244928_s_at | 1   |
| NADH dehydrogenase subunit 4                                                                                                                      | 244929_at   | 1   |
| hypothetical protein predicted by genscan                                                                                                         | 257404_at   | 1   |
| putative mitochondrial carrier protein Graves disease mitochondrial solute carrier protein- bovine, PIR2:S26596                                   | 254018_at   | 1   |
| putative protein contains similarity to unknown protein (emb CAB87908.1);supported by full-length cDNA: Ceres:152842.                             | 249793_at   | 1   |
| putative uridylate kinase similar to uridylate kinase GB:CAB13524 [Bacillus subtilis], GB:P74457 [Synechocystis PCC6803]; supported by cDNA: gi_  | 258885_at   | 0.9 |
| putative protein ; supported by cDNA: gi_13991647_gb_AF359388.1_AF359388                                                                          | 254043_at   | 0.9 |
| putative protein proline transport helper PTH1 - Candida albicans, EMBL:Y18210                                                                    | 252426_at   | 0.9 |
| putative protein kinase                                                                                                                           | 267624_at   | 0.9 |
| putative protein kinase contains a protein kinase domain profile (PDOC00100)                                                                      | 267564_at   | 0.9 |
| unknown protein                                                                                                                                   | 267523_at   | 0.9 |
| E2, ubiquitin-conjugating enzyme 2 (UBC2) identical to gi:2689242, SP:P42745; supported by cDNA: gi_12083309_gb_AF332451.1_AF332451               | 267484_at   | 0.9 |
| putative related to microbial divalent cation tolerance proteins ; supported by cDNA: gi_12963360_gb_AF327524.1_AF327524                          | 267405_at   | 0.9 |
| putative WRKY-type DNA binding protein ; supported by cDNA: gi_15027912_gb_AY045813.1_                                                            | 267246_at   | 0.9 |
| unknown protein                                                                                                                                   | 267069_at   | 0.9 |
| unknown protein                                                                                                                                   | 267017_at   | 0.9 |
| unknown protein ; supported by full-length cDNA: Ceres: 41621.                                                                                    | 266587_at   | 0.9 |
| phosphoprotein phosphatase, type 1 catalytic subunit identical to GB:X64328; supported by cDNA: gi_166571_gb_M93408.1_ATH1PPHA                    | 266238_at   | 0.9 |
| unknown protein ; supported by cDNA: gi_15028290_gb_AY045948.1_                                                                                   | 265481_at   | 0.9 |
| pEARL1 4 protein Same as GB: L43081; supported by cDNA: gi_871781_gb_L43081.1_ATHPEARA                                                            | 265440_at   | 0.9 |
| unknown protein Contains similarity to hypothetical mitochondrial import receptor subunit gb Z98597 from S. pombe. ESTs gb T45575 and gb Z2643    | 265041_at   | 0.9 |
| ribosomal protein identical to ribosomal protein GI:806279 from [Arabidopsis thaliana]                                                            | 265032_at   | 0.9 |
| unknown protein ESTs gb H37208,gb H36853 come from this gene                                                                                      | 264665_at   | 0.9 |
| allyl alcohol dehydrogenase, putative similar to allyl alcohol dehydrogenase GI:9758497 from [Arabidopsis thaliana]; supported by cDNA: gi_143351 | 264637_at   | 0.9 |
| unknown protein Similar to Glycine SRC2 (gb AB000130). ESTs gb H76869,gb T21700,gb ATTS5089 come from this gene; supported by cDNA: gi_           | 264655_at   | 0.9 |
| putative zinc transporter Similar to Arabidopsis Fe(II) transport protein (gb U27590)                                                             | 264574_at   | 0.9 |
| putative calcium-binding protein, calreticulin similar to GB:AAA80652;supported by full-length cDNA: Ceres:27210.                                 | 264260_at   | 0.9 |
| putative rubisco subunit binding-protein alpha subunit ;supported by full-length cDNA: Ceres:25773.                                               | 264069_at   | 0.9 |
| hypothetical protein predicted by genefinder                                                                                                      | 263938_at   | 0.9 |
| putative glycine-rich RNA-binding protein                                                                                                         | 263608_at   | 0.9 |
| putative non-LTR retroelement reverse transcriptase                                                                                               | 263559_at   | 0.9 |
| putative protein kinase contains a protein kinase domain profile (PDOC00100)                                                                      | 263461_at   | 0.9 |
| cyclophilin-like protein ;supported by full-length cDNA: Ceres:124189.                                                                            | 263288_at   | 0.9 |
| Expressed protein ; supported by full-length cDNA: Ceres: 264189.                                                                                 | 263209_at   | 0.9 |

|                                                                                                                                                           |           |     |
|-----------------------------------------------------------------------------------------------------------------------------------------------------------|-----------|-----|
| hypothetical protein predicted by genemark.hmm                                                                                                            | 262897_at | 0.9 |
| unknown protein ;supported by full-length cDNA: Ceres:17521.                                                                                              | 262801_at | 0.9 |
| alpha-xylosidase precursor identical to alpha-xylosidase precursor GB:AAD05539 GI:4163997 from [Arabidopsis thaliana]; supported by cDNA: gi_1            | 262230_at | 0.9 |
| AP2 domain containing protein, putative similar to AP2 domain containing protein GI:2281649 from [Arabidopsis thaliana];supported by full-length c        | 262197_at | 0.9 |
| unknown protein ; supported by full-length cDNA: Ceres: 39741.                                                                                            | 262204_at | 0.9 |
| unknown protein ; supported by cDNA: gi_13937194_gb_AF372951.1_AF372951                                                                                   | 262164_at | 0.9 |
| AP2 domain containing protein, putative similar to AP2 domain containing protein GI:2281633 from [Arabidopsis thaliana]; supported by cDNA: gi_1:         | 262135_at | 0.9 |
| hypothetical protein predicted by genemark.hmm;supported by full-length cDNA: Ceres:116121.                                                               | 262111_at | 0.9 |
| hypothetical protein contains similarity to PP2 lectin polypeptide GI:410436 from [Cucurbita maxima]; supported by cDNA: gi_15292968_gb_AY0509            | 262061_at | 0.9 |
| gibberellin 3 beta-hydroxylase, putative similar to gibberellin 3 beta-hydroxylase GI:3982753 from [Arabidopsis thaliana]; supported by cDNA: gi_194      | 261768_at | 0.9 |
| unknown protein identical to unknown protein GB:AAC32929 GI:3395758 from [Arabidopsis thaliana];supported by full-length cDNA: Ceres:123625.              | 261745_at | 0.9 |
| protein kinase identical to protein kinase GI:2852447 from [Arabidopsis thaliana]; supported by cDNA: gi_2852446_dbj_D88206.1_D88206                      | 261526_at | 0.9 |
| ornithine carbamoyltransferase precursor identical to SP:O50039 from [Arabidopsis thaliana]; supported by cDNA: gi_2764517_emb_AJ000476.1_A               | 261122_at | 0.9 |
| transmembrane protein, putative similar to TRANSMEMBRANE PROTEIN TMP21 GB:Q63584 from [Rattus norvegicus]                                                 | 260852_at | 0.9 |
| unknown protein ;supported by full-length cDNA: Ceres:123140.                                                                                             | 260666_at | 0.9 |
| hypothetical protein contains Pfam profile: PF01965 ThiJ/PfpI family;supported by full-length cDNA: Ceres:101735.                                         | 260616_at | 0.9 |
| unknown protein similar to hypothetical protein GB:AAD12705 [Arabidopsis thaliana];supported by full-length cDNA: Ceres:40506.                            | 260179_at | 0.9 |
| unknown protein similar to Pi starvation-induced protein GB:BAA06151 from [Nicotiana tabacum]; supported by full-length cDNA: Ceres: 37751.               | 260176_at | 0.9 |
| Expressed protein ; supported by full-length cDNA: Ceres: 8189.                                                                                           | 260100_at | 0.9 |
| nucellin-like protein similar to nucellin GB:AAB96882 [Hordeum vulgare] (nucellin: similar to aspartic protease and its specific expression in nucellar c | 259733_at | 0.9 |
| unknown protein similar to hypothetical protein GB:P34661 [Caenorhabditis elegans]                                                                        | 259675_at | 0.9 |
| hypothetical protein                                                                                                                                      | 259551_at | 0.9 |
| putative small nuclear ribonucleoprotein (Sm-D1) similar to small nuclear ribonucleoprotein (Sm-D1) GB:AAD15345 [Arabidopsis thaliana];supported          | 259225_at | 0.9 |
| putative cytochrome P450 similar to cytochrome P450 89A2 GB:Q42602 [Arabidopsis thaliana]; supported by cDNA: gi_15983413_gb_AF424581.1_                  | 259058_at | 0.9 |
| unknown protein similar to hypothetical protein GB:AAC17612 [Arabidopsis thaliana];supported by full-length cDNA: Ceres:251012.                           | 259015_at | 0.9 |
| unknown protein predicted by genefinder, multiple est matches;supported by full-length cDNA: Ceres:7073.                                                  | 258939_at | 0.9 |
| unknown protein similar to a region of DNAJ domain-containing protein MCJ GB:AAD38506; supported by full-length cDNA: Ceres: 5219.                        | 258716_at | 0.9 |
| putative protein kinase contains Pfam profile: PF00069 Eukaryotic protein kinase domain (2 copies); supported by cDNA: gi_14581444_gb_AY02675             | 258683_at | 0.9 |
| Expressed protein ; supported by full-length cDNA: Ceres: 1232.                                                                                           | 258493_at | 0.9 |
| hypothetical protein predicted by genscan+                                                                                                                | 258391_at | 0.9 |
| Expressed protein ; supported by cDNA: gi_15810370_gb_AY056224.1_                                                                                         | 258124_at | 0.9 |
| unknown protein ; supported by cDNA: gi_15010765_gb_AY045684.1_                                                                                           | 257894_at | 0.9 |
| MutT-like protein contains Pfam profile: PF00293 Bacterial mutT protein                                                                                   | 257830_at | 0.9 |
| unknown protein ; supported by cDNA: gi_15292984_gb_AY050926.1_                                                                                           | 257705_at | 0.9 |
| unknown protein                                                                                                                                           | 257611_at | 0.9 |
| blue copper protein, putative similar to uclacyanin I GB:AAC32038 from [Arabidopsis thaliana] (Protein Sci (1996) 5(11):2175-83);supported by full-l      | 257151_at | 0.9 |
| hypothetical protein                                                                                                                                      | 256583_at | 0.9 |
| hypothetical protein predicted by genefinder and genscan;supported by full-length cDNA: Ceres:15024.                                                      | 255824_at | 0.9 |
| hypothetical protein                                                                                                                                      | 255723_at | 0.9 |
| Expressed protein ; supported by full-length cDNA: Ceres: 29072.                                                                                          | 255536_at | 0.9 |
| AtKAP alpha similar to AtKAP, GenBank accession number U69533; supported by cDNA: gi_14326480_gb_AF385693.1_AF385693                                      | 255507_at | 0.9 |
| RMA1 RING zinc finger protein identical to RMA1 gi:3164222; supported by cDNA: gi_3164221_dbj_AB008518.1_AB008518                                         | 255381_at | 0.9 |

|                                                                                                                                                |             |     |
|------------------------------------------------------------------------------------------------------------------------------------------------|-------------|-----|
| score=526.5, E=1.9e-154, N=3 ;supported by full-length cDNA: Ceres:3001.                                                                       | 255257_at   | 0.9 |
| hypothetical protein                                                                                                                           | 255021_at   | 0.9 |
| putative protein hypothetical protein F16G20.230 -Arabidopsis thaliana,PIR2:T05391;supported by full-length cDNA: Ceres:17771.                 | 254921_at   | 0.9 |
| hypothetical protein                                                                                                                           | 254727_at   | 0.9 |
| putative protein inositol polyphosphate 5-phosphatase, Homo sapiens,PATCHX:G1019103; supported by cDNA: gi_10444262_gb_AF289634.1_AF           | 254707_at   | 0.9 |
| Expressed protein ; supported by full-length cDNA: Ceres: 42850.                                                                               | 254609_at   | 0.9 |
| DAG-like protein DAG precursor, Antirrhinum majus, MNOS:S71747                                                                                 | 254493_at   | 0.9 |
| fatty acid hydroxylase - like protein fatty acid hydroxylase Fah1p, Arabidopsis thaliana, PID:g2736147; supported by cDNA: gi_14994242_gb_AY04 | 254448_at   | 0.9 |
| hypothetical protein ;supported by full-length cDNA: Ceres:29155.                                                                              | 254161_at   | 0.9 |
| putative protein ;supported by full-length cDNA: Ceres:5367.                                                                                   | 253981_at   | 0.9 |
| putative protein hypothetical chloroplast protein RF19, Guillardia theta, PIR2:S73274;supported by full-length cDNA: Ceres:32397.              | 253857_at   | 0.9 |
| putative protein                                                                                                                               | 253802_at   | 0.9 |
| ADP,ATP carrier-like protein ADP,ATP carrier protein-rice, PIR2:S33630;supported by full-length cDNA: Ceres:42036.                             | 253776_at   | 0.9 |
| putative protein predicted protein, Arabidopsis thaliana;supported by full-length cDNA: Ceres:154912.                                          | 253636_at   | 0.9 |
| putative protein LipB gene, Prochlorothrix hollandica, PID:G1399931; supported by cDNA: gi_15887051_dbj_AB072390.1_AB072390                    | 253553_at   | 0.9 |
| synaptobrevin-like protein synaptobrevin-like protein, Mus musculus;supported by full-length cDNA: Ceres:41543.                                | 253462_at   | 0.9 |
| putative protein protein phosphatase Wip1, Homo sapiens, PID:g2218063;supported by full-length cDNA: Ceres:40123.                              | 253323_at   | 0.9 |
| bZIP transcription factor ATB2                                                                                                                 | 253245_at   | 0.9 |
| putative protein SPOP, Homo sapiens, AJ000644;supported by full-length cDNA: Ceres:122670.                                                     | 253061_at   | 0.9 |
| putative protein ; supported by cDNA: gi_13878068_gb_AF370297.1_AF370297                                                                       | 252974_at   | 0.9 |
| glycine-rich protein (clone AtGRP8) ; supported by cDNA: gi_166838_gb_L00649.1_ATHRBPB                                                         | 252885_at   | 0.9 |
| hypothetical protein ; supported by full-length cDNA: Ceres: 281.                                                                              | 252723_at   | 0.9 |
| RNA-binding protein-like protein various RNA-binding proteins;supported by full-length cDNA: Ceres:9763.                                       | 252464_at   | 0.9 |
| serine palmitoyltransferase-like protein                                                                                                       | 252331_s_at | 0.9 |
| putative protein                                                                                                                               | 252155_at   | 0.9 |
| thioredoxin -like protein cop c2, Coprinus comatus, EMBL:CCO24279;supported by full-length cDNA: Ceres:260075.                                 | 251985_at   | 0.9 |
| putative protein amino acid selective channel protein - Hordeum vulgare, EMBL:AJ011921                                                         | 251208_at   | 0.9 |
| putative protein S1R protein - Homo sapiens, EMBL:AF113127                                                                                     | 251163_at   | 0.9 |
| putative protein various predicted proteins, Arabidopsis thaliana; supported by cDNA: gi_13878024_gb_AF370275.1_AF370275                       | 250937_at   | 0.9 |
| AMP-binding protein                                                                                                                            | 250114_s_at | 0.9 |
| translocon Tic40-like protein ; supported by cDNA: gi_16226312_gb_AF428299.1_AF428299                                                          | 250080_at   | 0.9 |
| Cu/Zn superoxide dismutase-like protein                                                                                                        | 250016_at   | 0.9 |
| putative protein rsc43, Dictyostelium discoideum, EMBL:AF011338;supported by full-length cDNA: Ceres:6084.                                     | 249984_at   | 0.9 |
| putative protein similar to unknown protein (pir C72413)                                                                                       | 249849_at   | 0.9 |
| putative protein predicted proteins, Arabidopsis thaliana;supported by full-length cDNA: Ceres:11539.                                          | 249377_at   | 0.9 |
| unknown protein ;supported by full-length cDNA: Ceres:23293.                                                                                   | 249177_at   | 0.9 |
| ATP synthase delta chain, mitochondrial precursor (sp Q96252) ; supported by cDNA: gi_1655483_dbj_D88376.1_D88376                              | 248825_at   | 0.9 |
| putative protein similar to unknown protein (gb AAF16660.1);supported by full-length cDNA: Ceres:15457.                                        | 248759_at   | 0.9 |
| putative protein similar to unknown protein (pir H71431);supported by full-length cDNA: Ceres:31680.                                           | 248763_at   | 0.9 |
| unknown protein                                                                                                                                | 248771_at   | 0.9 |
| unknown protein ;supported by full-length cDNA: Ceres:27885.                                                                                   | 248491_at   | 0.9 |
| putative protein similar to unknown protein (emb CAB62440.1)                                                                                   | 248016_at   | 0.9 |

|                                                                                                                                                        |             |     |
|--------------------------------------------------------------------------------------------------------------------------------------------------------|-------------|-----|
| putative protein non-consensus CG donor splice site at exon 1, GA donor splice site at exon 3, similar to unknown protein (pir T04268);supported b     | 247933_at   | 0.9 |
| putative protein similar to unknown protein (gb AAF04433.1);supported by full-length cDNA: Ceres:156439.                                               | 247944_at   | 0.9 |
| putative protein contains similarity to unknown protein (pir T08554); supported by full-length cDNA: Ceres: 266884.                                    | 247945_at   | 0.9 |
| nonspecific lipid-transfer protein precursor - like nonspecific lipid-transfer protein precursor, Brassica napus, EMBL:AF101038;supported by full-leng | 247717_at   | 0.9 |
| putative protein COP1-interacting protein CIP8, Arabidopsis thaliana, EMBL:AF162150; supported by cDNA: gi_15450686_gb_AY052711.1_                     | 247708_at   | 0.9 |
| mipC protein - like (aquaporin) mipC protein, common ice plant, PIR:T12440;supported by full-length cDNA: Ceres:33231.                                 | 247586_at   | 0.9 |
| putative protein strong similarity to unknown protein (emb CAB89350.1)                                                                                 | 247240_at   | 0.9 |
| protein phosphatase 2C-like protein                                                                                                                    | 247126_at   | 0.9 |
| putative protein various predicted bacterial rRNA methylases                                                                                           | 246852_at   | 0.9 |
| RAN1 small Ras-like GTP-binding nuclear protein (Ran-1) ;supported by full-length cDNA: Ceres:9480.                                                    | 246153_s_at | 0.9 |
| putative protein BEM46 bem1/bud5 suppressor, Schizosaccharomyces pombe, bem1/bud5 suppressor, EMBL:SP29892;supported by full-length cD                 | 246090_at   | 0.9 |
| Expressed protein ;supported by cDNA: Ceres:30129; supported by cDNA: gi:15028002                                                                      | 245602_at   | 0.9 |
| putative protein                                                                                                                                       | 245418_at   | 0.9 |
| Expressed protein ; supported by full-length cDNA: Ceres: 42223.                                                                                       | 245333_at   | 0.9 |
| scarecrow-like 13 (SCL13) ; supported by cDNA: gi_16930432_gb_AF419570.1_AF419570                                                                      | 245247_at   | 0.9 |
| putative protein similarity to cDNA clones from human and mouse                                                                                        | 245178_at   | 0.9 |
| putative dimethyladenosine transferase ; supported by cDNA: gi_14532649_gb_AY039949.1_                                                                 | 245122_at   | 0.9 |
| unknown protein                                                                                                                                        | 245106_at   | 0.9 |
| putative AP2 domain transcription factor                                                                                                               | 245078_at   | 0.9 |
| hypothetical protein                                                                                                                                   | 245000_at   | 0.9 |
| hypothetical protein                                                                                                                                   | 257322_at   | 0.9 |
| protein phosphatase 2C, putative similar to GB:CAB90633 from [Fagus sylvatica];supported by full-length cDNA: Ceres:118185.                            | 261077_at   | 0.8 |
| hypothetical protein predicted by genscan                                                                                                              | 259917_at   | 0.8 |
| Expressed protein ; supported by full-length cDNA: Ceres: 22461.                                                                                       | 256743_at   | 0.8 |
| unknown protein ; supported by cDNA: gi_14532715_gb_AY039982.1_                                                                                        | 256074_at   | 0.8 |
| putative protein endothelin converting enzyme, Bos primigenius taurus, PIR2:I46078                                                                     | 253256_at   | 0.8 |
| putative protein disulfide isomerase ; supported by cDNA: gi_15810003_gb_AY054270.1_                                                                   | 267605_at   | 0.8 |
| putative WRKY-type DNA binding protein                                                                                                                 | 267028_at   | 0.8 |
| hypothetical protein predicted by genefinder; supported by full-length cDNA: Ceres: 29146.                                                             | 267003_at   | 0.8 |
| Expressed protein ; supported by full-length cDNA: Ceres: 9670.                                                                                        | 266641_at   | 0.8 |
| putative plasma membrane intrinsic protein ;supported by full-length cDNA: Ceres:36296.                                                                | 266533_s_at | 0.8 |
| unknown protein ;supported by full-length cDNA: Ceres:33700.                                                                                           | 266259_at   | 0.8 |
| protease inhibitor II identical to GB:X69139, contains a gamma-thionin family signature (PDOC00725); supported by cDNA: gi_13878184_gb_AF37(           | 266119_at   | 0.8 |
| unknown protein                                                                                                                                        | 265987_at   | 0.8 |
| hypothetical protein predicted by genscan                                                                                                              | 265898_at   | 0.8 |
| RING-H2 finger protein RHA2b identical to GP AF078823; supported by cDNA: gi_3790570_gb_AF078823.1_AF078823                                            | 265740_at   | 0.8 |
| unknown protein                                                                                                                                        | 265637_at   | 0.8 |
| hypothetical protein predicted by genscan; supported by cDNA: gi_15292678_gb_AY050773.1_                                                               | 265512_at   | 0.8 |
| unknown protein ;supported by full-length cDNA: Ceres:250015.                                                                                          | 265458_at   | 0.8 |
| aquaporin (plasma membrane intrinsic protein 2C) water channel protein in plasma membrane;supported by full-length cDNA: Ceres:11998.                  | 265444_s_at | 0.8 |
| hypothetical protein predicted by genefinder;supported by full-length cDNA: Ceres:15103.                                                               | 265442_at   | 0.8 |
| lipoic acid synthase (LIP1) ; supported by cDNA: gi_14334939_gb_AY035143.1_                                                                            | 265392_at   | 0.8 |



|                                                                                                                                                   |             |     |
|---------------------------------------------------------------------------------------------------------------------------------------------------|-------------|-----|
| hypothetical protein                                                                                                                              | 265195_at   | 0.8 |
| putative presenilin similar to presenilin GB:AAD23630;supported by full-length cDNA: Ceres:43026.                                                 | 264807_at   | 0.8 |
| Expressed protein ; supported by full-length cDNA: Ceres: 22723.                                                                                  | 264441_at   | 0.8 |
| Expressed protein ; supported by full-length cDNA: Ceres: 39286.                                                                                  | 264443_at   | 0.8 |
| postsynaptic protein CRIPT, putative similar to postsynaptic protein CRIPT GI:3098551 from [Rattus norvegicus]; supported by full-length cDNA: Ce | 264399_at   | 0.8 |
| HSP100/ClpB, putative similar to HSP100/ClpB GI:9651530 [Phaseolus lunatus]                                                                       | 264402_at   | 0.8 |
| hypothetical protein Similar to hypothetical protein SPAC2F7.14c gi 1052797 from Schizosaccharomyces pombe cosmid gb Z50142                       | 264357_at   | 0.8 |
| unknown protein Strong similarity to gb D14550 extracellular dermal glycoprotein (EDGP) precursor from Daucus carota. ESTs gb H37281, gb T441     | 264365_s_at | 0.8 |
| hypothetical protein similar to hypothetical protein GI:2894569 from [Arabidopsis thaliana]; supported by cDNA: gi_15028186_gb_AY045916.1_        | 264289_at   | 0.8 |
| gamma glutamyl hydrolase, putative similar to gamma glutamyl hydrolase GI:1680711 from [Glycine max]; supported by cDNA: gi_3169655_gb_AF         | 264250_at   | 0.8 |
| beta-glucosidase, putative similar to beta-glucosidase GI:5030906 from [Polygonum tinctorium]                                                     | 264270_at   | 0.8 |
| receptor-like protein glossy1 (gl1), putative similar to receptor-like protein glossy1 (gl1) GI:1209703 from (Arabidopsis thaliana)               | 264147_at   | 0.8 |
| Mago Nashi-like protein similar to Mago Nashi, Genbank Accession Number U03559;supported by full-length cDNA: Ceres:35733.                        | 264152_at   | 0.8 |
| Expressed protein ; supported by cDNA: gi_15450487_gb_AY052345.1_                                                                                 | 263923_at   | 0.8 |
| putative farnesylated protein ;supported by full-length cDNA: Ceres:19570.                                                                        | 263866_at   | 0.8 |
| Expressed protein ; supported by full-length cDNA: Ceres: 29157.                                                                                  | 263840_at   | 0.8 |
| unknown protein ; supported by cDNA: gi_14423471_gb_AF386973.1_AF386973                                                                           | 263785_at   | 0.8 |
| hypothetical protein identical to hypothetical protein GB:AAD21690 GI:4512621 from (Arabidopsis thaliana)                                         | 263702_at   | 0.8 |
| unknown protein                                                                                                                                   | 263613_at   | 0.8 |
| hypothetical protein predicted by genefinder;supported by full-length cDNA: Ceres:32729.                                                          | 263567_at   | 0.8 |
| hypothetical protein predicted by genscan                                                                                                         | 263471_at   | 0.8 |
| unknown protein ;supported by full-length cDNA: Ceres:39169.                                                                                      | 263371_at   | 0.8 |
| hypothetical protein predicted by genscan and genefinder; supported by cDNA: gi_16649128_gb_AY059934.1_                                           | 263265_at   | 0.8 |
| beta-Amyrin Synthase, putative similar to beta-Amyrin Synthase GI:3688600 from [Panax ginseng]                                                    | 263124_at   | 0.8 |
| polyamine oxidase, putative similar to polyamine oxidase SP:O64411 [Zea mays (Maize)]; supported by cDNA: gi_13877614_gb_AF370508.1_AF3           | 262933_at   | 0.8 |
| hypothetical protein predicted by genemark.hmm                                                                                                    | 262918_at   | 0.8 |
| unknown protein ; supported by cDNA: gi_14596044_gb_AY042810.1_                                                                                   | 262845_at   | 0.8 |
| Expressed protein ; supported by full-length cDNA: Ceres: 18244.                                                                                  | 262746_at   | 0.8 |
| unknown protein ; supported by cDNA: gi_15724323_gb_AF412102.1_AF412102                                                                           | 262685_at   | 0.8 |
| heat shock protein, putative contains Pfam profile: PF00011 Hsp20/alpha crystallin family;supported by full-length cDNA: Ceres:21735.             | 262629_at   | 0.8 |
| hypothetical protein Strong similarity to gi 4734005 F3L12.7 hypothetical protein from Arabidopsis thaliana BAC gb AC007178; supported by cDNA: c | 262569_at   | 0.8 |
| Expressed protein ; supported by full-length cDNA: Ceres: 109156.                                                                                 | 262558_at   | 0.8 |
| hypothetical protein predicted by genscan; supported by cDNA: gi_14334811_gb_AY035079.1_                                                          | 262503_at   | 0.8 |
| unknown protein Similar to gb AF151884 CGI-126 protein from Homo sapiens. EST gb Z18048 comes from this gene; supported by full-length cDNA       | 262298_at   | 0.8 |
| scarecrow-like 3 identical to GB:AAD24404 GI:4580515 from [Arabidopsis thaliana] (Plant J. 18 (1), 111-119 (1999)); supported by cDNA: gi_15810   | 261866_at   | 0.8 |
| transcription factor, putative similar to transcription factor GB:CAA74050 GI:2398525 from [Arabidopsis thaliana]                                 | 261803_at   | 0.8 |
| unknown protein                                                                                                                                   | 261295_at   | 0.8 |
| calreticulin, putative similar to GB:AAF06346 from [Vitis vinifera]                                                                               | 261248_at   | 0.8 |
| hypothetical protein predicted by genemark.hmm                                                                                                    | 261086_at   | 0.8 |
| unknown protein ;supported by full-length cDNA: Ceres:37370.                                                                                      | 261033_at   | 0.8 |
| hypothetical protein predicted by genemark.hmm; supported by cDNA: gi_13430817_gb_AF360321.1_AF360321                                             | 260927_at   | 0.8 |
| scarecrow-like 1 identical to scarecrow-like 1 GB:AAF21043 GI:6644390 from [Arabidopsis thaliana];supported by full-length cDNA: Ceres:109490.    | 260878_at   | 0.8 |

|                                                                                                                                                        |             |     |
|--------------------------------------------------------------------------------------------------------------------------------------------------------|-------------|-----|
| hypothetical protein predicted by genemark.hmm;supported by full-length cDNA: Ceres:157.                                                               | 260804_at   | 0.8 |
| serine carboxypeptidase precursor, putative similar to GB:AAD42963 from [Matricaria chamomilla]                                                        | 260739_at   | 0.8 |
| expressed protein ; supported by full-length cDNA: Ceres: 256275.                                                                                      | 260708_at   | 0.8 |
| Expressed protein ; supported by full-length cDNA: Ceres: 105765.                                                                                      | 260409_at   | 0.8 |
| unknown protein ;supported by full-length cDNA: Ceres:96702.                                                                                           | 260357_at   | 0.8 |
| unknown protein similar to hypothetical proteins GB:AAD39276 [Arabidopsis thaliana], GB:CAB53491 [Oryza sativa];supported by full-length cDNA:         | 260227_at   | 0.8 |
| hypothetical protein predicted by genefinder;supported by full-length cDNA: Ceres:38940.                                                               | 260096_at   | 0.8 |
| unknown protein                                                                                                                                        | 259945_at   | 0.8 |
| unknown protein similar to GB:AAB81674 [Arabidopsis thaliana]                                                                                          | 259763_at   | 0.8 |
| unknown protein similar to GB:AAD41433;supported by full-length cDNA: Ceres:146543.                                                                    | 259706_at   | 0.8 |
| unknown protein ; supported by cDNA: gi_15293080_gb_AY050974.1_                                                                                        | 259666_at   | 0.8 |
| hypothetical protein                                                                                                                                   | 259583_at   | 0.8 |
| cathepsin B-like cysteine protease, putative similar to cathepsin B-like cysteine proteinase GI:609175 from [Nicotiana rustica]                        | 259441_at   | 0.8 |
| hypothetical protein predicted by genemark.hmm; supported by cDNA: gi_15810522_gb_AY056300.1_                                                          | 259406_at   | 0.8 |
| unknown protein ;supported by full-length cDNA: Ceres:5232.                                                                                            | 259357_at   | 0.8 |
| unknown protein ;supported by full-length cDNA: Ceres:22512.                                                                                           | 259192_at   | 0.8 |
| putative disease resistance protein similar to putative disease resistance protein GB:AAF01514 from clone F9F8                                         | 258894_at   | 0.8 |
| putative ATPase (ISW2-like) similar to ISW2 (ATPase component of a two subunit chromatin remodeling complex) GB:6324879 [Saccharomyces ce              | 258904_at   | 0.8 |
| DAG protein, putative similar to DAG PROTEIN GB:Q38732 from [Antirrhinum majus]                                                                        | 258526_at   | 0.8 |
| unknown protein ;supported by full-length cDNA: Ceres:15303.                                                                                           | 258394_at   | 0.8 |
| DNA-binding protein contains AP2 domain, identical to AP2 domain containing protein RAP2.2 from GB:AAC49768 from [Arabidopsis thaliana];supp           | 258366_at   | 0.8 |
| putative ethylene-inducible protein similar to ethylene-inducible protein GB:M88254 from [Hevea brasiliensis]; supported by cDNA: gi_4103951_gb_       | 258336_at   | 0.8 |
| hypothetical protein similar to hypothetical protein GB:CAB36714 from [Arabidopsis thaliana], contains Pfam profile: PF01485 IBR domain                | 258230_s_at | 0.8 |
| indoleacetic acid (IAA)-inducible gene (IAA7) identical to (IAA7) gene GB:U18409 [Arabidopsis thaliana] (J. Mol. Biol. 251 (4), 533-549 (1995));supp   | 257769_at   | 0.8 |
| unknown protein                                                                                                                                        | 257619_at   | 0.8 |
| chaperonin, putative similar to CHAPERONIN CPN60-2, MITOCHONDRIAL PRECURSOR GB:Q05046 from [Cucurbita maxima];supported by full-l                      | 257608_at   | 0.8 |
| hypothetical protein contains Pfam profile: PF01535 domain of unknown function                                                                         | 257188_at   | 0.8 |
| Expressed protein ; supported by full-length cDNA: Ceres: 93242.                                                                                       | 257193_at   | 0.8 |
| lipid transfer protein, putative similar to GB:AAB47967 from [Hordeum vulgare], contains Pfam profile: PF00279 Plant lipid transfer protein family; su | 257066_at   | 0.8 |
| mitochondrial chaperonin hsp60 identical to mitochondrial chaperonin hsp60 GB:Z11547 [Arabidopsis thaliana] (Plant Mol. Biol. 18 (5), 873-885 (199     | 256905_at   | 0.8 |
| hypothetical protein contains similarity to RNA polymerase transcriptional regulation mediator GB:AAC26869 from [Homo sapiens]                         | 256812_at   | 0.8 |
| cytochrome P450, putative contains Pfam profile: PF00067 cytochrome P450; supported by cDNA: gi_15292830_gb_AY050849.1_                                | 256589_at   | 0.8 |
| unknown protein                                                                                                                                        | 256530_at   | 0.8 |
| Eukaryotic translation initiation factor 5, putative Eukaryotic translation initiation factor 5 [Zea mays] GI:4160402; supported by cDNA: gi_15810338_ | 256502_at   | 0.8 |
| hypothetical protein predicted by genefinder;supported by full-length cDNA: Ceres:12509.                                                               | 256442_at   | 0.8 |
| 26S proteasome regulatory subunit S12, putative nearly identical to 26S proteasome regulatory subunit S12 (MOV34 ) SP:O24412 [Arabidopsis thal         | 256249_at   | 0.8 |
| hypothetical protein contains similarity to receptor protein kinase-like protein GI:10177178 from [Arabidopsis thaliana]                               | 256030_at   | 0.8 |
| unknown protein ; supported by cDNA: gi_16648676_gb_AY058114.1_                                                                                        | 255960_at   | 0.8 |
| hypothetical protein predicted by genemark.hmm; supported by cDNA: gi_13877978_gb_AF370252.1_AF370252                                                  | 255939_at   | 0.8 |
| predicted protein of unknown function ; supported by cDNA: gi_15809916_gb_AY054226.1_                                                                  | 255710_at   | 0.8 |
| Shaggy related protein kinase tetha ; supported by cDNA: gi_17063157_gb_AY062099.1_                                                                    | 255635_at   | 0.8 |
| putative protein                                                                                                                                       | 255651_at   | 0.8 |

|                                                                                                                                                            |             |     |
|------------------------------------------------------------------------------------------------------------------------------------------------------------|-------------|-----|
| coded for by <i>A. thaliana</i> cDNA R64991 ;supported by full-length cDNA: Ceres:19543.                                                                   | 255477_at   | 0.8 |
| auxin-binding protein 1 precursor ;supported by full-length cDNA: Ceres:34126.                                                                             | 255412_at   | 0.8 |
| putative M-type thioredoxin similar to <i>A. thaliana</i> protein F21B7.7, GenBank accession number AC002560;supported by full-length cDNA: Ceres:109      | 255379_at   | 0.8 |
| putative protein <i>Arabidopsis thaliana</i> chromosome II BAC T30B22 genomic sequence, gene T30B22.22, PID:g2529679                                       | 255028_at   | 0.8 |
| putative protein 24 kDa seed maturation protein - Glycine max,PID:g4102690;supported by full-length cDNA: Ceres:23536.                                     | 254920_at   | 0.8 |
| putative protein                                                                                                                                           | 254794_at   | 0.8 |
| putative protein hypothetical protein sll1769 - <i>Synechocystis</i> sp,PID:d1018406;supported by full-length cDNA: Ceres:18082.                           | 254760_at   | 0.8 |
| potassium transporter-like protein putative potassium transporter AtKT2p & AtKT1p, <i>Arabidopsis thaliana</i> , Patchx:G2384669 & Patchx:G2384671         | 254520_at   | 0.8 |
| hypothetical protein ; supported by cDNA: gi_15028392_gb_AY045999.1_                                                                                       | 254481_at   | 0.8 |
| ethylene-regulated transcript 2 (ERT2)                                                                                                                     | 254434_at   | 0.8 |
| hypothetical protein ;supported by full-length cDNA: Ceres:36892.                                                                                          | 254424_at   | 0.8 |
| hsp 70-like protein heat shock 70 protein - <i>Spinacia oleracea</i> ,PID:g2654208                                                                         | 254148_at   | 0.8 |
| putative mitochondrial uncoupling protein mitochondrial uncoupling protein, <i>Arabidopsis thaliana</i> (thale cress), PATX:E1316826;supported by full-le  | 254120_at   | 0.8 |
| superoxide dismutase (EC 1.15.1.1) (Fe)(fragment) ;supported by full-length cDNA: Ceres:32935.                                                             | 254098_at   | 0.8 |
| nucleosome assembly protein I-like protein ; supported by cDNA: gi_15450807_gb_AY054484.1_                                                                 | 253996_at   | 0.8 |
| translation initiation factor ; supported by full-length cDNA: Ceres: 5206.                                                                                | 253900_at   | 0.8 |
| hypothetical protein                                                                                                                                       | 253888_at   | 0.8 |
| glycine-rich protein glycine-rich cell wall structural protein - <i>Petunia x hybrida</i> ,Pir2:A26099;supported by full-length cDNA: Ceres:115209.        | 253629_at   | 0.8 |
| hypothetical protein ; supported by cDNA: gi_14335143_gb_AY037251.1_                                                                                       | 253596_s_at | 0.8 |
| predicted protein ; supported by cDNA: gi_15292824_gb_AY050846.1_                                                                                          | 253524_at   | 0.8 |
| Expressed protein ; supported by full-length cDNA: Ceres: 40692.                                                                                           | 253485_at   | 0.8 |
| Expressed protein ; supported by cDNA: gi_16648998_gb_AY059869.1_                                                                                          | 253342_at   | 0.8 |
| hypothetical protein ;supported by full-length cDNA: Ceres:115167.                                                                                         | 253232_at   | 0.8 |
| putative protein predicted protein, <i>Arabidopsis thaliana</i> ;supported by full-length cDNA: Ceres:1368.                                                | 253183_at   | 0.8 |
| putative protein                                                                                                                                           | 253004_at   | 0.8 |
| putative thaumatin-like protein thaumatin-like protein(TL1) - <i>Arabidopsis thaliana</i> , PID:g4105697                                                   | 252949_at   | 0.8 |
| disease resistance response like protein disease resistance response protein 206-d - <i>Pisum sativum</i> , PID:g508844                                    | 252951_at   | 0.8 |
| putative protein AP2 domain containing protein RAP2.4, <i>Arabidopsis thaliana</i>                                                                         | 252859_at   | 0.8 |
| disease resistance protein RPP13-like protein disease resistance protein RPP8 - <i>Arabidopsis thaliana</i> , EMBL:AF089710; supported by cDNA: gi_14      | 252485_at   | 0.8 |
| putative protein ; supported by cDNA: gi_14517539_gb_AY039605.1_                                                                                           | 252134_at   | 0.8 |
| mucin-like protein hemomucin, <i>Drosophila melanogaster</i> , EMBL:DM42014;supported by full-length cDNA: Ceres:38547.                                    | 252092_at   | 0.8 |
| putative protein several hypothetical proteins - <i>Arabidopsis thaliana</i> ;supported by full-length cDNA: Ceres:112338.                                 | 251530_at   | 0.8 |
| DNA-binding WRKY - like protein AR411 protein, <i>Arabidopsis thaliana</i> , EMBL:ATD748; supported by full-length cDNA: Ceres: 100465.                    | 251553_at   | 0.8 |
| Expressed protein ; supported by full-length cDNA: Ceres: 17055.                                                                                           | 251446_at   | 0.8 |
| palmitoyl-protein thioesterase precursor - like palmitoyl-protein thioesterase precursor, <i>Mus musculus</i> , EMBL:AF071025; supported by full-length cD | 251408_at   | 0.8 |
| hypothetical protein                                                                                                                                       | 251414_at   | 0.8 |
| putative protein weak homology with predicted proteins, <i>Arabidopsis thaliana</i>                                                                        | 251391_at   | 0.8 |
| putative protein transcription factor Pti6 - <i>Lycopersicon esculentum</i> , PIR:T07728;supported by full-length cDNA: Ceres:100688.                      | 251282_at   | 0.8 |
| putative protein PrMC3, <i>Pinus radiata</i> , EMBL:AF110333                                                                                               | 251200_at   | 0.8 |
| putative protein predicted protein, <i>Caenorhabditis elegans</i> ;supported by full-length cDNA: Ceres:20404.                                             | 251117_at   | 0.8 |
| light-inducible protein ATLS1                                                                                                                              | 251098_at   | 0.8 |
| ferritin 1 precursor ;supported by full-length cDNA: Ceres:1100.                                                                                           | 251109_at   | 0.8 |

|                                                                                                                                                        |           |     |
|--------------------------------------------------------------------------------------------------------------------------------------------------------|-----------|-----|
| putative protein hypothetical protein T18N14.110 - Arabidopsis thaliana, PIR:T46069; supported by cDNA: gi_15912284_gb_AY056420.1_                     | 251074_at | 0.8 |
| hypothetical protein                                                                                                                                   | 251026_at | 0.8 |
| histone deacetylase -like protein histone deacetylase, HD2-p39, nucleolar, Zea mays, PIR:T04141                                                        | 250912_at | 0.8 |
| AtPH1-like protein ;supported by full-length cDNA: Ceres:109246.                                                                                       | 250748_at | 0.8 |
| thioredoxin-like ; supported by cDNA: gi_4973263_gb_AF144391.1_AF144391                                                                                | 250649_at | 0.8 |
| putative amidase                                                                                                                                       | 250627_at | 0.8 |
| diacylglycerol kinase (ATDGK1) ; supported by cDNA: gi_1374771_dbj_D63787.1_ATHATDGK1                                                                  | 250556_at | 0.8 |
| putative protein                                                                                                                                       | 250562_at | 0.8 |
| ribosomal protein - like chloroplast ribosomal protein L17, Nicotiana tabacum, PIR:T01744;supported by full-length cDNA: Ceres:22697.                  | 250495_at | 0.8 |
| heat shock protein 70 (Hsc70-5) ; supported by cDNA: gi_6746589_gb_AF217458.1_AF217458                                                                 | 250502_at | 0.8 |
| lysophospholipase - like protein lysophospholipase homolog LPL1, Oryza sativa, EMBL:AF039531;supported by full-length cDNA: Ceres:15284.               | 250335_at | 0.8 |
| putative protein similar to unknown protein (emb CAB69839.1)                                                                                           | 250257_at | 0.8 |
| squalene monooxygenase 1,2 (squalene epoxidase 1,2) (se 1,2) (sp O65402)                                                                               | 249775_at | 0.8 |
| putative protein contains similarity to 40S ribosomal protein S10; supported by cDNA: gi_14335121_gb_AY037240.1_                                       | 249310_at | 0.8 |
| putative protein contains similarity to unknown protein (dbj BAA76827.1); supported by cDNA: gi_14532601_gb_AY039925.1_                                | 249181_at | 0.8 |
| unknown protein ; supported by cDNA: gi_13926304_gb_AF372903.1_AF372903                                                                                | 248975_at | 0.8 |
| Expressed protein ; supported by full-length cDNA: Ceres: 28462.                                                                                       | 248762_at | 0.8 |
| gibberellin 20-oxidase-like protein                                                                                                                    | 248443_at | 0.8 |
| ubiquitin-like protein SMT3-like ; supported by full-length cDNA: Ceres: 13697.                                                                        | 248103_at | 0.8 |
| unknown protein                                                                                                                                        | 248050_at | 0.8 |
| putative protein similar to unknown protein (pir C71422);supported by full-length cDNA: Ceres:819.                                                     | 247988_at | 0.8 |
| putative protein ;supported by full-length cDNA: Ceres:3086.                                                                                           | 247748_at | 0.8 |
| nonspecific lipid-transfer protein precursor - like nonspecific lipid-transfer protein precursor, Brassica napus, EMBL:AF101038;supported by full-leng | 247718_at | 0.8 |
| Expressed protein ; supported by full-length cDNA: Ceres: 30313.                                                                                       | 247434_at | 0.8 |
| putative protein predicted proteins, Arabidopsis thaliana; supported by full-length cDNA: Ceres: 38273.                                                | 247443_at | 0.8 |
| putative protein predicted proteins, Oryza sativa, Arabidopsis thaliana and yeast                                                                      | 247396_at | 0.8 |
| protein kinase ; supported by cDNA: gi_16974578_gb_AY060555.1_                                                                                         | 247384_at | 0.8 |
| putative protein similar to unknown protein (pir T01257)                                                                                               | 247386_at | 0.8 |
| Expressed protein ; supported by full-length cDNA: Ceres: 35683.                                                                                       | 247305_at | 0.8 |
| putative protein similar to unknown protein (emb CAB89373.1); supported by cDNA: gi_14334413_gb_AY034898.1_                                            | 247285_at | 0.8 |
| putative protein contains similarity to ribonucleoprotein F                                                                                            | 247121_at | 0.8 |
| putative protein predicted proteins, Arabidopsis thaliana and Drosophila melanogaster                                                                  | 246897_at | 0.8 |
| nucleic acid binding protein - like nucleic acid binding protein, Oryza sativa, PIR:T02745;supported by full-length cDNA: Ceres:32443.                 | 246856_at | 0.8 |
| hexose transporter - like protein hexose transporter HT2, Lycopersicon esculentum, EMBL:LES132224; supported by cDNA: gi_15010579_gb_AY0-              | 246831_at | 0.8 |
| mevalonate kinase supported by full-length cDNA: Ceres:1045.                                                                                           | 246778_at | 0.8 |
| putative protein                                                                                                                                       | 246644_at | 0.8 |
| hypothetical protein                                                                                                                                   | 246479_at | 0.8 |
| cytochrome P450 like protein ; supported by cDNA: gi_4176419_dbj_AB008097.1_AB008097                                                                   | 246216_at | 0.8 |
| putative protein centrosomal Nek2-associated protein 1, Homo sapiens, EMBL:AF049105; supported by cDNA: gi_13877754_gb_AF370140.1_AF3                  | 246171_at | 0.8 |
| AKIN beta1 ; supported by full-length cDNA: Ceres: 41668.                                                                                              | 246028_at | 0.8 |
| chloroplast Cpn21 protein ; supported by cDNA: gi_14334611_gb_AY034979.1_                                                                              | 246003_at | 0.8 |
| water stress-induced protein, putative similar to water stress-induced protein GI:454879 from [Oryza sativa]; supported by cDNA: gi_15215761_gb_       | 245627_at | 0.8 |

|                                                                                                                                           |             |     |
|-------------------------------------------------------------------------------------------------------------------------------------------|-------------|-----|
| hypothetical protein ;supported by full-length cDNA: Ceres:2505.                                                                          | 245388_at   | 0.8 |
| putative protein ; supported by cDNA: gi_13926241_gb_AF372879.1_AF372879                                                                  | 245309_at   | 0.8 |
| hypothetical protein ; supported by cDNA: gi_15451033_gb_AY054597.1_                                                                      | 245297_at   | 0.8 |
| putative protein similarity to proteins of unknown function from human and mouse                                                          | 245180_at   | 0.8 |
| putative flavonol reductase                                                                                                               | 245141_at   | 0.8 |
| hypothetical protein                                                                                                                      | 244922_s_at | 0.8 |
| putative protein various predicted proteins, Arabidopsis thaliana                                                                         | 254179_at   | 0.8 |
| putative protein                                                                                                                          | 250481_at   | 0.8 |
| Expressed protein ; supported by full-length cDNA: Ceres: 124835.                                                                         | 245369_at   | 0.8 |
| similar to axi 1 protein from Nicotiana tabacum                                                                                           | 267393_at   | 0.7 |
| unknown protein                                                                                                                           | 258687_at   | 0.7 |
| putative protein nucleoid DNA-binding protein cnd41, chloroplast, common tobacco, PIR:T01996; supported by cDNA: gi_15809849_gb_AY054192. | 249626_at   | 0.7 |
| putative protein strong similarity to unknown protein (pir  T04808)                                                                       | 248091_at   | 0.7 |
| Expressed protein ; supported by full-length cDNA: Ceres: 30472.                                                                          | 267555_at   | 0.7 |
| putative auxin-regulated protein ;supported by full-length cDNA: Ceres:1711.                                                              | 267461_at   | 0.7 |
| unknown protein ; supported by full-length cDNA: Ceres: 37787.                                                                            | 267278_at   | 0.7 |
| putative spliceosome associated protein ; supported by cDNA: gi_15450714_gb_AY052725.1_                                                   | 267062_at   | 0.7 |
| putative protein phosphatase 2C                                                                                                           | 266834_s_at | 0.7 |
| Expressed protein ; supported by full-length cDNA: Ceres: 124634.                                                                         | 266808_at   | 0.7 |
| unknown protein                                                                                                                           | 266620_at   | 0.7 |
| Expressed protein ; supported by cDNA: gi_15215834_gb_AY050447.1_                                                                         | 266583_at   | 0.7 |
| putative small nuclear ribonucleoprotein E ; supported by full-length cDNA: Ceres: 4850.                                                  | 266579_at   | 0.7 |
| putative auxin-regulated protein                                                                                                          | 266322_at   | 0.7 |
| hypothetical protein predicted by genscan and genefinder; supported by cDNA: gi_13605570_gb_AF361611.1_AF361611                           | 266182_at   | 0.7 |
| unknown protein                                                                                                                           | 265900_at   | 0.7 |
| unknown protein ;supported by full-length cDNA: Ceres:19157.                                                                              | 265866_at   | 0.7 |
| predicted protein                                                                                                                         | 265802_at   | 0.7 |
| putative elongation factor beta-1 ;supported by full-length cDNA: Ceres:35337.                                                            | 265816_s_at | 0.7 |
| putative ferredoxin ; supported by full-length cDNA: Ceres: 26333.                                                                        | 265649_at   | 0.7 |
| unknown protein                                                                                                                           | 265620_at   | 0.7 |
| unknown protein                                                                                                                           | 265417_at   | 0.7 |
| putative sugar transporter                                                                                                                | 265424_at   | 0.7 |
| putative ADP-ribosylation factor ;supported by full-length cDNA: Ceres:5695.                                                              | 265337_at   | 0.7 |
| putative D-amino acid dehydrogenase                                                                                                       | 265318_at   | 0.7 |
| unknown protein ;supported by full-length cDNA: Ceres:6967.                                                                               | 265284_at   | 0.7 |
| unknown protein ; supported by cDNA: gi_15912334_gb_AY056445.1_                                                                           | 265150_at   | 0.7 |
| hypothetical protein predicted by genemark.hmm                                                                                            | 264693_at   | 0.7 |
| hypothetical protein predicted by genemark.hmm;supported by full-length cDNA: Ceres:2118.                                                 | 264636_at   | 0.7 |
| unknown protein Location of EST gb Z34586 and gb Z34166; supported by cDNA: gi_15529271_gb_AY052260.1_                                    | 264509_at   | 0.7 |
| hypothetical protein predicted by grail                                                                                                   | 264379_at   | 0.7 |
| potassium transporter, putative similar to potassium transporter GI:2654088 from [Arabidopsis thaliana]                                   | 264338_at   | 0.7 |
| Expressed protein ; supported by full-length cDNA: Ceres: 13607.                                                                          | 264304_at   | 0.7 |

|                                                                                                                                                            |             |     |
|------------------------------------------------------------------------------------------------------------------------------------------------------------|-------------|-----|
| unknown protein                                                                                                                                            | 264254_at   | 0.7 |
| actin depolymerizing factor 6 ;supported by full-length cDNA: Ceres:255294.                                                                                | 264089_at   | 0.7 |
| putative fructose biphosphate aldolase ;supported by full-length cDNA: Ceres:13024.                                                                        | 263921_at   | 0.7 |
| SKP1 interacting partner 6 (SKIP6), putative similar to SKP1 interacting partner 6 GI:10716957 from [Arabidopsis thaliana]                                 | 263898_at   | 0.7 |
| Expressed protein ; supported by full-length cDNA: Ceres: 15689.                                                                                           | 263712_at   | 0.7 |
| putative steroid binding protein ;supported by full-length cDNA: Ceres:10261.                                                                              | 263534_at   | 0.7 |
| hypothetical protein predicted by genscan                                                                                                                  | 263465_at   | 0.7 |
| unknown protein                                                                                                                                            | 263023_at   | 0.7 |
| RNA polymerase II subunit, putative similar to RNA polymerase II subunit hRPB17 GI:854177 from [Homo sapiens];supported by full-length cDNA: C             | 262957_s_at | 0.7 |
| hypothetical protein predicted by genemark.hmm; supported by cDNA: gi_15146253_gb_AY049268.1_                                                              | 262952_at   | 0.7 |
| linker histone protein, putative contains Pfam profile:PF00538 linker histone H1 and H5 family;supported by full-length cDNA: Ceres:10525.                 | 262840_at   | 0.7 |
| putative inosine-5-monophosphate dehydrogenase strong similarity to gb L34684 inosine monophosphate dehydrogenase (IMPDH) from Arabidopsi                  | 262754_at   | 0.7 |
| unknown protein similar to gb AJ224359 surfeit locus protein 5 (surf5b) from Homo sapiens;supported by full-length cDNA: Ceres:143886.                     | 262714_s_at | 0.7 |
| unknown protein ESTs gb H37295 and gb R64895 come from this gene;supported by full-length cDNA: Ceres:13543.                                               | 262592_at   | 0.7 |
| hypothetical protein similar to GB:P49967 signal recognition particle 54 kDa subunit (Srp54-1) from [Arabidopsis thaliana].;supported by full-length c     | 262601_at   | 0.7 |
| hypothetical protein predicted by genscan+; supported by cDNA: gi_15293248_gb_AY051058.1_                                                                  | 262571_at   | 0.7 |
| unknown protein ESTs gb R30529, gb Z48463, gb Z48467, gb AA597369 and gb AA394772 come from this gene; supported by cDNA: gi_1620967                       | 262574_at   | 0.7 |
| unknown protein EST gb T21171 comes from this gene                                                                                                         | 262489_at   | 0.7 |
| unknown protein Contains similarity to gb AJ000644 SPOP (speckle-type POZ protein) from Homo sapiens and contains a PF 00651 BTB/POZ dom                   | 262495_at   | 0.7 |
| ribosomal protein S9, putative similar to ribosomal protein S9 GI:5456946 from [Arabidopsis thaliana]; supported by full-length cDNA: Ceres: 25038         | 262172_at   | 0.7 |
| unknown protein ; supported by cDNA: gi_15294195_gb_AF410289.1_AF410289                                                                                    | 262175_at   | 0.7 |
| hypothetical protein predicted by genemark.hmm; supported by cDNA: gi_13605648_gb_AF361805.1_AF361805                                                      | 262065_at   | 0.7 |
| unknown protein ;supported by full-length cDNA: Ceres:35811.                                                                                               | 262049_at   | 0.7 |
| unknown protein ;supported by full-length cDNA: Ceres:101924.                                                                                              | 261948_at   | 0.7 |
| adenine nucleotide translocase, putative similar to adenine nucleotide translocase GI:6469340 from [Arabidopsis thaliana];supported by full-length c       | 261767_s_at | 0.7 |
| small nuclear ribonucleoprotein, putative similar to small nuclear ribonucleoprotein GI:600749 from [Homo sapiens]; supported by full-length cDNA: (       | 261725_at   | 0.7 |
| protein kinase, putative identical to bHLH protein GB:CAA67885 GI:1465368 from [Arabidopsis thaliana]; supported by cDNA: gi_14335047_gb_AY(               | 261713_at   | 0.7 |
| unknown protein similar to putative esterase GB:AAD17422 GI:4335745 from [Arabidopsis thaliana]                                                            | 261607_at   | 0.7 |
| serine/threonine kinase, putative similar to serine/threonine kinase GB:CAA73067.1 GI:2632252 from [Sorghum bicolor]; supported by cDNA: gi_14             | 261581_at   | 0.7 |
| endoplasmic reticulum-type calcium-transporting ATPase 4 identical to GB:AAD29957 from [Arabidopsis thaliana] (Plant Physiol. 120 (1999) In press          | 261433_s_at | 0.7 |
| unknown protein ;supported by full-length cDNA: Ceres:727.                                                                                                 | 261336_at   | 0.7 |
| developmentally regulated GTP-binding protein identical to GB:AAB67830 from (Arabidopsis thaliana) (Plant Mol. Biol. 39 (1), 75-82 (1999)); suppor         | 261036_at   | 0.7 |
| hypothetical protein predicted by genemark.hmm; supported by cDNA: gi_14334897_gb_AY035122.1_                                                              | 260968_at   | 0.7 |
| hypothetical protein predicted by genemark.hmm                                                                                                             | 260946_at   | 0.7 |
| hypothetical protein predicted by genemark.hmm                                                                                                             | 260760_at   | 0.7 |
| hypothetical protein predicted by genefinder                                                                                                               | 260605_at   | 0.7 |
| putative chloroplast protein CP12 ; supported by full-length cDNA: Ceres: 95662.                                                                           | 260529_at   | 0.7 |
| unknown protein ;supported by full-length cDNA: Ceres:27109.                                                                                               | 260444_at   | 0.7 |
| putative glucosyltransferase similar to glucosyltransferase GB:AAB36653 from [Nicotiana tabacum]                                                           | 260379_at   | 0.7 |
| Eukaryotic initiation factor 5A , putative similar to eukaryotic initiation factor 5A (2) (Nicotiana plumbaginifolia) GI:19702;supported by full-length cD | 260350_at   | 0.7 |
| E2, ubiquitin-conjugating enzyme, putative similar to putative protein GB:CAB43411 [Arabidopsis thaliana];supported by full-length cDNA: Ceres:58          | 260180_at   | 0.7 |
| hypothetical protein similar to vanilloid receptor-like protein GB:AAD26363 from [Homo sapiens]supported by full-length cDNA: Ceres:21959.                 | 260129_at   | 0.7 |

|                                                                                                                                                       |             |     |
|-------------------------------------------------------------------------------------------------------------------------------------------------------|-------------|-----|
| putative trypsin inhibitor similar to trypsin inhibitor propeptide GB:AAB68964 [Brassica oleracea]; contains Pfam profile: PF00197 Trypsin and protea | 260101_at   | 0.7 |
| putative DNA-binding protein contains Pfam profile: PF01388 ARID DNA binding domain                                                                   | 259967_at   | 0.7 |
| putative RING zinc finger protein contains Pfam profile: PF00097 Zinc finger, C3HC4 type (RING finger); supported by full-length cDNA: Ceres: 2741    | 259982_at   | 0.7 |
| 3-hydroxy-3-methylglutaryl CoA reductase (AA 1-592) identical to hydroxy methylglutaryl CoA reductase (AA 1-592) GB:X15032 (Plant Mol. Biol. 13       | 259983_at   | 0.7 |
| zinc finger protein, putative similar to GI:3170601 from [Zea mays] (Cell 93 (4), 593-603 (1998));supported by full-length cDNA: Ceres:40167.         | 259932_at   | 0.7 |
| unknown protein                                                                                                                                       | 259943_at   | 0.7 |
| predicted protein ; supported by cDNA: gi_13358245_gb_AF325060.2_AF325060                                                                             | 259889_at   | 0.7 |
| beta-1,3-glucanase precursor, putative similar to GI:4097948 from [Oryza sativa] (Gene 223 (1-2), 311-320 (1998))                                     | 259823_at   | 0.7 |
| unknown protein ;supported by full-length cDNA: Ceres:141685.                                                                                         | 259591_at   | 0.7 |
| hypothetical protein ; supported by cDNA: gi_1518449_gb_U43340.1_ATU43340                                                                             | 259517_at   | 0.7 |
| hypothetical protein preedicted by genemark.hmm                                                                                                       | 259490_at   | 0.7 |
| dioxygenase, putative similar to dioxygenase GI:1666096 from [Marah macrocarpus]                                                                      | 259445_at   | 0.7 |
| methionine aminopeptidase I (MAP1), putative similar to methionine aminopeptidase I (MAP1) GI:975722 from [Saccharomyces cerevisiae]; support         | 259363_at   | 0.7 |
| putative nodulin similar to nodulin GB:AAA91034 from [Medicago sativa];supported by full-length cDNA: Ceres:16718.                                    | 259308_at   | 0.7 |
| putative RING-H2 zinc finger protein ATL6 similar to GB:AAD33584 from [Arabidopsis thaliana]; supported by cDNA: gi_4928402_gb_AF132016.1_            | 259312_at   | 0.7 |
| O-acetylserine (thiol) lyase identical to O-acetylserine (thiol) lyase GB:BAA21628 [Arabidopsis thaliana]; supported by cDNA: gi_2281779_dbj_AB00     | 259172_at   | 0.7 |
| unknown protein similar to hin1 GB:CAA68848 [Nicotiana tabacum]; supported by cDNA: gi_9502173_gb_AF264698.1_AF264698                                 | 259071_at   | 0.7 |
| putative ubiquinol-cytochrome C reductase complex ubiquinone-binding protein (QP-C) similar to ubiquinol-cytochrome C reductase complex ubiquin       | 258772_at   | 0.7 |
| low temperature and salt responsive protein LTI6A identical to low temperature and salt responsive protein LTI6A GB:AAC97512 from [Arabidopsis t      | 258735_at   | 0.7 |
| putative histone H2B similar to histone H2B-3 GB:CAA12231 from [Lycopersicon esculentum]                                                              | 258707_at   | 0.7 |
| unknown protein ; supported by cDNA: gi_15983478_gb_AF424614.1_AF424614                                                                               | 258647_at   | 0.7 |
| unknown protein                                                                                                                                       | 258654_at   | 0.7 |
| disease resistance gene (RPM1) identical to disease resistance gene (RPM1) GB:X87851 [Arabidopsis thaliana]                                           | 258544_at   | 0.7 |
| unknown protein ;supported by full-length cDNA: Ceres:8978.                                                                                           | 258562_at   | 0.7 |
| putative RAD23 similar to RAD23 protein GB:CAB51544 from [Lycopersicon esculentum]; supported by cDNA: gi_14517453_gb_AY039562.1_                     | 258499_at   | 0.7 |
| alternative oxidase 1a precursor identical to GB:Q39219 from [Arabidopsis thaliana];supported by full-length cDNA: Ceres:116257.                      | 258452_at   | 0.7 |
| unknown protein similar to pop3 peptide GB:AAC26526 from [Populus balsamifera subsp. trichocarpa X Populus deltoides];supported by full-length c      | 258412_at   | 0.7 |
| unknown protein ;supported by full-length cDNA: Ceres:112601.                                                                                         | 258432_at   | 0.7 |
| hypothetical protein                                                                                                                                  | 258262_at   | 0.7 |
| hypothetical protein similar to putative transposase of transposable element Ac GB:CAA25635 [Zea mays]                                                | 258246_s_at | 0.7 |
| putative GTP pyrophosphokinase similar to GTP PYROPHOSPHOKINASE GB:O87331 from [Corynebacterium glutamicum]; supported by cDNA: gi_                   | 258207_at   | 0.7 |
| unknown protein ;supported by full-length cDNA: Ceres:15577.                                                                                          | 258188_at   | 0.7 |
| Expressed protein ; supported by full-length cDNA: Ceres: 26411.                                                                                      | 258092_at   | 0.7 |
| putative peroxiredoxin similar to peroxiredoxin Q GB:BAA90524 from [Sedum lineare]; supported by cDNA: gi_15081742_gb_AY048264.1_                     | 258087_at   | 0.7 |
| putative myc-like DNA-binding protein similar to GB:AAB72192 from [Arabidopsis thaliana]                                                              | 257990_at   | 0.7 |
| cell elongation protein, Dwarf1 identical to GB:S71189 from [Arabidopsis thaliana]; supported by cDNA: gi_516042_gb_U12400.1_ATU12400                 | 257938_at   | 0.7 |
| hypothetical protein predicted by genemark                                                                                                            | 257948_at   | 0.7 |
| Expressed protein ; supported by cDNA: gi_16604419_gb_AY058108.1_                                                                                     | 257914_at   | 0.7 |
| 1,4-alpha-glucan branching enzyme, putative similar to GB:NP_000149 from [Homo sapiens], contains Pfam profile: PF00128 Alpha amylase                 | 257667_at   | 0.7 |
| cytochrome P450, putative similar to cytochrome P450 GB:O65784 [Arabidopsis thaliana]; supported by full-length cDNA: Ceres: 262802.                  | 257634_s_at | 0.7 |
| unknown protein                                                                                                                                       | 257596_at   | 0.7 |
| RING zinc finger protein contains Pfam profile: PF00097 zinc finger, C3HC4 type (RING finger)                                                         | 257081_at   | 0.7 |

|                                                                                                                                                   |             |     |
|---------------------------------------------------------------------------------------------------------------------------------------------------|-------------|-----|
| purple acid phosphatase, putative similar to purple acid phosphatase GB:CAA06921 [Ipomoea batatas]                                                | 257087_at   | 0.7 |
| putative 3-hydroxybutyryl-CoA dehydrogenase similar to 3-HYDROXYBUTYRYL-COA DEHYDROGENASE GB:Q45223 from [Bradyrhizobium japonicum]               | 257052_at   | 0.7 |
| dem-like protein similar to dem GB:CAA73973 from [Lycopersicon esculentum] (Plant Cell (1998) 10, 1-12)                                           | 257029_at   | 0.7 |
| unknown protein                                                                                                                                   | 256375_at   | 0.7 |
| GTPase, putative contains Pfam profile: PF01926 GTPase of unknown function                                                                        | 256274_at   | 0.7 |
| unknown protein ; supported by full-length cDNA: Ceres: 38389.                                                                                    | 256238_at   | 0.7 |
| unknown protein similar to hypothetical protein GI:1469227 from [Brassica oleracea];supported by full-length cDNA: Ceres:94809.                   | 256191_at   | 0.7 |
| unknown protein                                                                                                                                   | 256046_at   | 0.7 |
| plastid protein identical to GB:Z86094; supported by full-length cDNA: Ceres: 8717.                                                               | 255791_at   | 0.7 |
| Expressed protein ; supported by full-length cDNA: Ceres: 36326.                                                                                  | 255670_at   | 0.7 |
| predicted protein of unknown function similar to P. falciparum O1 protein, GenBank accession number AF030694                                      | 255495_at   | 0.7 |
| putative pre-mRNA splicing factor similar to yeast pre-mRNA splicing factors; supported by cDNA: gi_16604550_gb_AY059720.1_                       | 255382_at   | 0.7 |
| putative DNA-directed RNA polymerase subunit similar to A. fulgidus DNA-directed RNA polymerase subunit M, GenBank accession number AE001         | 255176_s_at | 0.7 |
| hypothetical protein                                                                                                                              | 255155_at   | 0.7 |
| AX110P -like protein AX110P -Daucus carota,PID:g285739;supported by full-length cDNA: Ceres:19582.                                                | 255047_at   | 0.7 |
| putative protein ; supported by full-length cDNA: Ceres: 142381.                                                                                  | 254999_at   | 0.7 |
| Ribosomal protein L7Ae -like various L7Ae ribosomal proteins; supported by full-length cDNA: Ceres: 33381.                                        | 254831_at   | 0.7 |
| putative protein                                                                                                                                  | 254778_at   | 0.7 |
| DnaJ-like protein DnaJ-like protein, Phaseolus vulgaris, U77935; supported by cDNA: gi_6691126_gb_AF214107.1_AF214107                             | 254688_at   | 0.7 |
| putative protein predicted protein, Arabidopsis thaliana                                                                                          | 254402_at   | 0.7 |
| putative protein SF16 protein, Helianthus annuus, PID:g560150                                                                                     | 254293_at   | 0.7 |
| putative protein hypothetical protein T8K22.16, Arabidopsis thalianachromosome II BAC T8K22, PATX:G3184285; supported by cDNA: gi_1661229         | 254132_at   | 0.7 |
| putative protein                                                                                                                                  | 253959_at   | 0.7 |
| mRNA cleavage factor subunit - like protein mRNA cleavage factor I 25 kDa subunit, Homo sapiens, AJ001810;supported by full-length cDNA: Cere     | 253672_at   | 0.7 |
| hypothetical protein ;supported by full-length cDNA: Ceres:249769.                                                                                | 253643_at   | 0.7 |
| snRNP Sm protein F - like Sm protein F, Homo sapiens, PIR:S55053; supported by full-length cDNA: Ceres: 37087.                                    | 253668_at   | 0.7 |
| putative protein ;supported by full-length cDNA: Ceres:32848.                                                                                     | 253640_at   | 0.7 |
| predicted protein cation transport protein ChaC, Escherichia coli, PIR2:G64868;supported by full-length cDNA: Ceres:39740.                        | 253522_at   | 0.7 |
| putative protein predicted protein, Arabidopsis thaliana, PATCHX:G2252634                                                                         | 253475_at   | 0.7 |
| 2-dehydro-3-deoxyphosphoheptonate aldolase ;supported by full-length cDNA: Ceres:37432.                                                           | 253333_at   | 0.7 |
| DNA-directed RNA polymerase (EC 2.7.7.6) II largest chain                                                                                         | 253133_at   | 0.7 |
| peroxidase - like protein peroxidase, Arabidopsis thaliana, gb:X98314                                                                             | 253099_s_at | 0.7 |
| putative protein predicted protein, Arabidopsis thaliana;supported by full-length cDNA: Ceres:33704.                                              | 253043_at   | 0.7 |
| cytochrome P450 - like protein cytochrome P450, Glycyrrhiza echinata, AB001379;supported by full-length cDNA: Ceres:253698.                       | 253046_at   | 0.7 |
| hypothetical protein                                                                                                                              | 253020_at   | 0.7 |
| cysteine proteinase RD19A identical to thiol protease SP:P43296, GI:435618 from [Arabidopsis thaliana];supported by full-length cDNA: Ceres:3713  | 252927_at   | 0.7 |
| protein kinase-like protein protein kinase - Solanum berthaultii, EMBL:X97980                                                                     | 252646_at   | 0.7 |
| nuclear receptor binding factor-like protein nuclear receptor binding factor-1 NRBF-1 - Rattus norvegicus, EMBL:AB015724;supported by full-length | 252542_at   | 0.7 |
| scarecrow-like protein scarecrow-like 11 - Arabidopsis thaliana, EMBL:AF036307;supported by full-length cDNA: Ceres:35201.                        | 252483_at   | 0.7 |
| putative protein several hypothetical proteins                                                                                                    | 252496_at   | 0.7 |
| putative protein PIT1 - Arabidopsis thaliana, GB: AF130849                                                                                        | 252422_at   | 0.7 |
| putative protein hypothetical protein - Arabidopsis thaliana, EMBL:CAB38293;supported by full-length cDNA: Ceres:17840.                           | 252220_at   | 0.7 |



|                                                                                                                                                           |             |     |
|-----------------------------------------------------------------------------------------------------------------------------------------------------------|-------------|-----|
| putative protein                                                                                                                                          | 252186_at   | 0.7 |
| putative protein predicted protein, <i>Oryza sativa</i> , EMBL:AP000367;supported by full-length cDNA: Ceres:1514.                                        | 252093_at   | 0.7 |
| expressed protein supported by cDNA: gi:15450891                                                                                                          | 252048_at   | 0.7 |
| ribosomal protein L17 -like protein ribosomal protein L17, chloroplast, <i>Nicotiana tabacum</i> , PIR:T01744;supported by full-length cDNA: Ceres:25166. | 251883_at   | 0.7 |
| putative protein lateral root primordia (LRP1) - <i>Arabidopsis thaliana</i> , EMBL:AT24702; supported by cDNA: gi_15450614_gb_AY052675.1_                | 251900_at   | 0.7 |
| putative protein hypothetical protein SPBC19C2.12 - <i>Schizosaccharomyces pombe</i> , PIR:T39803;supported by full-length cDNA: Ceres:92264.             | 251483_at   | 0.7 |
| putative protein hypothetical protein At2g45900 - <i>Arabidopsis thaliana</i> , EMBL:AC004665                                                             | 251368_at   | 0.7 |
| putative protein hypothetical protein At2g46330 - <i>Arabidopsis thaliana</i> , EMBL:AC006526;supported by full-length cDNA: Ceres:11394.                 | 251281_at   | 0.7 |
| putative protein putative proteins - different species; supported by cDNA: gi_14517419_gb_AY039545.1_                                                     | 251187_at   | 0.7 |
| putative protein                                                                                                                                          | 251194_at   | 0.7 |
| putative protein hypothetical proteins - <i>Arabidopsis thaliana</i>                                                                                      | 251078_at   | 0.7 |
| ribonuclease II-like protein ribonuclease II family protein, <i>Deinococcus radiodurans</i> , PIR:C75571                                                  | 251040_at   | 0.7 |
| putative protein ; supported by cDNA: gi_14190430_gb_AF378893.1_AF378893                                                                                  | 250970_at   | 0.7 |
| polyubiquitin (UBQ3) identical to GI:928809; supported by full-length cDNA: Ceres: 20908.                                                                 | 250935_at   | 0.7 |
| putative protein ; supported by full-length cDNA: Ceres: 270908.                                                                                          | 250923_at   | 0.7 |
| putative protein ; supported by cDNA: gi_2160689_gb_U73526.1_ATU73526                                                                                     | 250900_at   | 0.7 |
| helicase-like transcription factor-like protein                                                                                                           | 250807_at   | 0.7 |
| putative protein similar to unknown protein (pir T02514);supported by full-length cDNA: Ceres:117347.                                                     | 250777_at   | 0.7 |
| putative protein contains similarity to RNA-binding protein;supported by full-length cDNA: Ceres:36764.                                                   | 250721_at   | 0.7 |
| diadenosine 5,5-P1,P4-tetraphosphate hydrolase-like protein ; supported by cDNA: gi_13937174_gb_AF372941.1_AF372941                                       | 250705_at   | 0.7 |
| calnexin homolog                                                                                                                                          | 250625_at   | 0.7 |
| putative protein 110K5.11, unknown protein, <i>Sorghum bicolor</i> , EMBL:AF124045; supported by cDNA: gi_13605727_gb_AF361845.1_AF361845                 | 250409_at   | 0.7 |
| putative protein predicted protein, <i>Arabidopsis thaliana</i>                                                                                           | 250145_at   | 0.7 |
| putative protein predicted proteins, <i>Arabidopsis thaliana</i>                                                                                          | 250155_at   | 0.7 |
| APG5 (autophagy 5)-like protein                                                                                                                           | 250088_at   | 0.7 |
| auxin-induced protein-like                                                                                                                                | 250012_x_at | 0.7 |
| putative protein ;supported by full-length cDNA: Ceres:154134.                                                                                            | 249954_at   | 0.7 |
| kinase associated protein phosphatase ; supported by cDNA: gi_15027992_gb_AY045853.1_                                                                     | 249924_at   | 0.7 |
| unknown protein                                                                                                                                           | 249872_at   | 0.7 |
| MtN3-like protein ; supported by cDNA: gi_3747110_gb_AF095641.1_AF095641                                                                                  | 249800_at   | 0.7 |
| prohibitin (gb AAC49691.1) ;supported by full-length cDNA: Ceres:37298.                                                                                   | 249344_at   | 0.7 |
| uroporphyrin III methylase (gb AAB92676.1) ; supported by cDNA: gi_1146164_gb_L47479.1_ATHUPM1R                                                           | 249325_at   | 0.7 |
| putative protein similar to unknown protein (gb AAF24581.1)                                                                                               | 249258_at   | 0.7 |
| GAMM1 protein-like ; supported by cDNA: gi_15146291_gb_AY049287.1_                                                                                        | 249238_at   | 0.7 |
| putative protein strong similarity to unknown protein (gb AAF24960.1)                                                                                     | 249133_at   | 0.7 |
| unknown protein ;supported by full-length cDNA: Ceres:36901.                                                                                              | 248966_at   | 0.7 |
| putative protein similar to unknown protein (pir T05524);supported by full-length cDNA: Ceres:767.                                                        | 248952_at   | 0.7 |
| putative protein similar to unknown protein (sp P74035); supported by cDNA: gi_15292692_gb_AY050780.1_                                                    | 248906_at   | 0.7 |
| putative protein contains similarity to unknown protein (pir T39016);supported by full-length cDNA: Ceres:15623.                                          | 248757_at   | 0.7 |
| unknown protein ;supported by full-length cDNA: Ceres:116332.                                                                                             | 248646_at   | 0.7 |
| putative protein contains similarity to pyridoxamine 5-phosphate oxidase;supported by full-length cDNA: Ceres:6244.                                       | 248560_at   | 0.7 |
| putative protein contains similarity to L-isoaspartyl protein carboxyl methyltransferase                                                                  | 248544_at   | 0.7 |

|                                                                                                                                                      |             |     |
|------------------------------------------------------------------------------------------------------------------------------------------------------|-------------|-----|
| putative protein contains similarity to squamosa promoter binding protein;supported by full-length cDNA: Ceres:113229.                               | 248524_s_at | 0.7 |
| putative protein similar to unknown protein (pir  S77462); supported by cDNA: gi_15081647_gb_AY048216.1_                                             | 248287_at   | 0.7 |
| GTPase activator protein of Rab-like small GTPases-like protein ; supported by cDNA: gi_14517421_gb_AY039546.1_                                      | 248222_at   | 0.7 |
| putative protein contains similarity to phycocyanin/early nodulin-like protein                                                                       | 248236_at   | 0.7 |
| putative protein various predicted proteins from different species;supported by full-length cDNA: Ceres:36809.                                       | 247787_at   | 0.7 |
| cyclophilin ROC7 ;supported by full-length cDNA: Ceres:25325.                                                                                        | 247791_at   | 0.7 |
| putative protein predicted protein, Arabidopsis thaliana; supported by cDNA: gi_14517559_gb_AY039615.1_                                              | 247574_at   | 0.7 |
| putative protein                                                                                                                                     | 247547_at   | 0.7 |
| putative protein contains similarity to kinase                                                                                                       | 247368_at   | 0.7 |
| nucleotide diphosphate kinase Ia (emb CAB58230.1) ; supported by cDNA: gi_3063660_gb_AF058391.1_AF058391                                             | 247376_at   | 0.7 |
| DNA topoisomerase III                                                                                                                                | 247301_at   | 0.7 |
| immunophilin (gb AAB57847.1) ;supported by full-length cDNA: Ceres:10243.                                                                            | 247281_at   | 0.7 |
| putative protein similar to unknown protein (dbj BAA75199.1)                                                                                         | 247187_at   | 0.7 |
| lysosomal Pro-X carboxypeptidase                                                                                                                     | 247156_at   | 0.7 |
| putative protein similar to unknown protein (pir T05276); supported by cDNA: gi_15292834_gb_AY050851.1_                                              | 247049_at   | 0.7 |
| putative protein hypothetical protein - Ricinus communis, EMBL:Z81012;supported by full-length cDNA: Ceres:1351.                                     | 246919_at   | 0.7 |
| Expressed protein ; supported by full-length cDNA: Ceres: 30174.                                                                                     | 246842_at   | 0.7 |
| putative protein ;supported by full-length cDNA: Ceres:232091.                                                                                       | 246645_at   | 0.7 |
| 14-3-3 protein GF14upsilon (grf5) identical to 14-3-3 protein GF14 upsilon GI:2232148 from [Arabidopsis thaliana] ; supported by cDNA: gi_1433453    | 246489_at   | 0.7 |
| aminopeptidase-like protein ; supported by cDNA: gi_13430673_gb_AF360249.1_AF360249                                                                  | 246219_at   | 0.7 |
| putative protein hypothetical protein F2A19.120 - Arabidopsis thaliana, PIR:T47944                                                                   | 246173_s_at | 0.7 |
| putative protein ;supported by full-length cDNA: Ceres:39563.                                                                                        | 245981_at   | 0.7 |
| putative protein predicted proteins - Arabidopsis thaliana;supported by full-length cDNA: Ceres:2537.                                                | 245984_at   | 0.7 |
| putative protein protein phosphatase-1 regulatory subunit 7 alpha2 - Homo sapiens, EMBL:AF067136;supported by full-length cDNA: Ceres:110392         | 245938_at   | 0.7 |
| GTL1 - like protein GTL1, Arabidopsis thaliana, EMBL:ATAJ3215; supported by cDNA: gi_14423451_gb_AF386963.1_AF386963                                 | 245861_at   | 0.7 |
| hypothetical protein                                                                                                                                 | 245868_at   | 0.7 |
| S-ribonuclease binding protein SBP1, putative similar to S-ribonuclease binding protein SBP1 GI:6760451 from [Petunia hybrida]; supported by cDN     | 245781_at   | 0.7 |
| hypothetical protein predicted by genscan+; supported by cDNA: gi_16323183_gb_AY057696.1_                                                            | 245776_at   | 0.7 |
| Expressed protein ; supported by cDNA: gi_11762135_gb_AF324994.1_AF324994                                                                            | 245684_at   | 0.7 |
| carnitine racemase like protein ;supported by full-length cDNA: Ceres:28978.                                                                         | 245359_at   | 0.7 |
| hypothetical protein ;supported by full-length cDNA: Ceres:42815.                                                                                    | 245361_at   | 0.7 |
| ethylene responsive element binding factor-like protein (AtERF6) ; supported by cDNA: gi_3298497_dbj_AB013301.1_AB013301                             | 245250_at   | 0.7 |
| unknown protein ;supported by full-length cDNA: Ceres:23203.                                                                                         | 245143_at   | 0.7 |
| PSII L protein                                                                                                                                       | 245022_at   | 0.7 |
| hypothetical protein                                                                                                                                 | 244958_at   | 0.7 |
| unknown protein                                                                                                                                      | 257477_at   | 0.7 |
| unknown protein                                                                                                                                      | 257519_at   | 0.7 |
| Yippee-like protein similar to Yippee putative zinc binding protein GB:AAD47882 [Homo sapiens]                                                       | 257522_at   | 0.7 |
| putative microfibril-associated protein                                                                                                              | 255093_s_at | 0.7 |
| unknown protein similar to unknown protein GB:AAD24850;supported by full-length cDNA: Ceres:3900.                                                    | 263179_at   | 0.6 |
| hypothetical protein similar to putative beta-1,3-glucanase GB:AAD26909 GI:4662638 from [Arabidopsis thaliana]                                       | 261004_at   | 0.6 |
| putative cell division control protein cdc2 similar to protein kinase (EC 2.7.1.37) cdc2 GB:A36074 [Mus musculus] (protein kinase cdc2);supported by | 259978_at   | 0.6 |

|                                                                                                                                                              |             |     |
|--------------------------------------------------------------------------------------------------------------------------------------------------------------|-------------|-----|
| hypothetical protein predicted by genemark;supported by full-length cDNA: Ceres:123678.                                                                      | 257969_at   | 0.6 |
| hypothetical protein                                                                                                                                         | 254502_at   | 0.6 |
| transporter -like protein N system amino acids transporter NAT-1, Mus musculus, EMBL:AF159856                                                                | 249535_at   | 0.6 |
| putative protein large number of predicted zinc finger proteins, Arabidopsis thaliana, Homo sapiens and others                                               | 247675_at   | 0.6 |
| Escherichia coli /REF=J04423 /DEF=E coli bioC protein corresponding to nucleotides 4257-4573 of J04423 /LEN=777 (-5 and -3 represent transcriptX-r2-Ec-bioC- |             | 0.6 |
| Arabidopsis thaliana /REF=U84969 /DEF=ubiquitin (UBQ11) gene, complete cds /LEN=1140 (_5, _M, _3 represent transcript regions 5 prime, Middk-Athal-Ubq_5     |             | 0.6 |
| putative leucine-rich repeat disease resistance protein                                                                                                      | 267596_s_at | 0.6 |
| hypothetical protein predicted by genefinder and genscan;supported by full-length cDNA: Ceres:23742.                                                         | 267553_s_at | 0.6 |
| unknown protein ;supported by full-length cDNA: Ceres:35578.                                                                                                 | 267504_at   | 0.6 |
| unknown protein ; supported by full-length cDNA: Ceres: 9990.                                                                                                | 267510_at   | 0.6 |
| unknown protein                                                                                                                                              | 267524_at   | 0.6 |
| 30S ribosomal protein S5 ; supported by full-length cDNA: Ceres: 38063.                                                                                      | 267435_at   | 0.6 |
| unknown protein ; supported by cDNA: gi_13899086_gb_AF370538.1_AF370538                                                                                      | 267379_at   | 0.6 |
| unknown protein ;supported by full-length cDNA: Ceres:9398.                                                                                                  | 267364_at   | 0.6 |
| unknown protein                                                                                                                                              | 267323_at   | 0.6 |
| Expressed protein ; supported by full-length cDNA: Ceres: 114879.                                                                                            | 267309_at   | 0.6 |
| diacylglycerol O-acyltransferase ; supported by cDNA: gi_15450799_gb_AY054480.1_                                                                             | 267280_at   | 0.6 |
| hypothetical protein predicted by genefinder                                                                                                                 | 267199_at   | 0.6 |
| ERD15 protein identical to GB D30719; supported by full-length cDNA: Ceres: 31388.                                                                           | 267104_at   | 0.6 |
| unknown protein                                                                                                                                              | 267116_at   | 0.6 |
| unknown protein                                                                                                                                              | 267072_at   | 0.6 |
| unknown protein                                                                                                                                              | 267018_at   | 0.6 |
| putative pyruvate dehydrogenase E1 beta subunit ;supported by full-length cDNA: Ceres:38439.                                                                 | 266904_at   | 0.6 |
| hypothetical protein predicted by genscan                                                                                                                    | 266916_at   | 0.6 |
| remorin identical to GB:M25268, a non-specific DNA binding protein; may be involved in intercellular communication; supported by cDNA: gi_15028:             | 266897_at   | 0.6 |
| 40S ribosomal protein S15A                                                                                                                                   | 266684_at   | 0.6 |
| putative CCCH-type zinc finger protein ;supported by full-length cDNA: Ceres:101255.                                                                         | 266695_at   | 0.6 |
| unknown protein ;supported by full-length cDNA: Ceres:26655.                                                                                                 | 266657_at   | 0.6 |
| putative thiamin biosynthesis protein                                                                                                                        | 266673_at   | 0.6 |
| putative zinc-finger protein (B-box zinc finger domain)                                                                                                      | 266514_at   | 0.6 |
| putative protein kinase contains a protein kinase domain profile (PDOC00100)                                                                                 | 266428_at   | 0.6 |
| unknown protein                                                                                                                                              | 266285_at   | 0.6 |
| putative aquaporin (water channel protein) ; supported by cDNA: gi_15010777_gb_AY045690.1_                                                                   | 266172_at   | 0.6 |
| putative trehalose-6-phosphate synthase                                                                                                                      | 266072_at   | 0.6 |
| hypothetical protein predicted by genefinder; supported by cDNA: gi_13877832_gb_AF370179.1_AF370179                                                          | 266001_at   | 0.6 |
| unknown protein ; supported by cDNA: gi_14334541_gb_AY035175.1_                                                                                              | 265739_at   | 0.6 |
| putative alanine acetyl transferase ;supported by full-length cDNA: Ceres:21201.                                                                             | 265668_at   | 0.6 |
| putative S1 self-incompatibility protein                                                                                                                     | 265517_at   | 0.6 |
| hypothetical protein contains Pfam profile: PF01363 FYVE zinc finger; supported by full-length cDNA: Ceres: 15739.                                           | 265035_at   | 0.6 |
| unknown protein Location of EST gb AA395277 gb T44807;supported by full-length cDNA: Ceres:36286.                                                            | 264894_at   | 0.6 |
| putative RING zinc finger protein ; supported by cDNA: gi_3790572_gb_AF078824.1_AF078824                                                                     | 264854_at   | 0.6 |
| unknown protein location of EST gb T45083 and gb R65542; supported by cDNA: gi_15215601_gb_AY050329.1_                                                       | 264728_at   | 0.6 |

|                                                                                                                                                     |             |     |
|-----------------------------------------------------------------------------------------------------------------------------------------------------|-------------|-----|
| uracil phosphoribosyltransferase, putative similar to uracil phosphoribosyltransferase 1 GB:AAD28199 GI:4704662 from [Arabidopsis thaliana]         | 264561_at   | 0.6 |
| CTP synthase-like protein similar to ctp synthase (sp P17812 PYRG_HUMAN); similar to ESTs gb AA660762, gb AA220982, dbj AU008137, gb AI01           | 264529_at   | 0.6 |
| unknown protein similar to ESTs gb T42386, gb H36247, gb N38423, gb T21830, and gb AA585725; supported by cDNA: gi_14423427_gb_AF3869               | 264445_at   | 0.6 |
| putative nuclear transport factor similar to nuclear transport factor 2 (NTF2) from [Oryza sativa], GB:BAA81910; similar to ESTs gb T21347, gb N963 | 264446_at   | 0.6 |
| unknown protein similar to salt-inducible protein (gi 375717); similar to ESTs gb R30192 and gb AA651017                                            | 264452_at   | 0.6 |
| putative mitogen-activated protein kinase, MAP Kinase 1 similar to ESTs gb T41567 and gb R30629; supported by cDNA: gi_464136_dbj_D14713.1          | 264405_at   | 0.6 |
| hypothetical protein predicted by genscan                                                                                                           | 264171_at   | 0.6 |
| hypothetical protein contains similarity to lipid transfer protein GI:498038 from (Senecio odorus)                                                  | 264146_at   | 0.6 |
| putative GTP cyclohydrolase                                                                                                                         | 264045_at   | 0.6 |
| putative protein phosphatase                                                                                                                        | 263862_at   | 0.6 |
| unknown protein                                                                                                                                     | 263829_at   | 0.6 |
| putative ferritin                                                                                                                                   | 263831_at   | 0.6 |
| cysteine proteinase similar to cysteine proteinase RD19A (thiol protease) GI:435618, SP:P43296 from [Arabidopsis thaliana];supported by full-length | 263757_at   | 0.6 |
| hypothetical protein predicted by genefinder; supported by cDNA: gi_13265516_gb_AF324697.2_AF324697                                                 | 263759_at   | 0.6 |
| unknown protein ; supported by full-length cDNA: Ceres: 34035.                                                                                      | 263631_at   | 0.6 |
| hypothetical protein predicted by genscan and genefinder;supported by full-length cDNA: Ceres:7520.                                                 | 263637_at   | 0.6 |
| CONSTANS-like B-box zinc finger protein ;supported by full-length cDNA: Ceres:17434.                                                                | 263537_at   | 0.6 |
| unknown protein                                                                                                                                     | 263438_at   | 0.6 |
| hypothetical protein                                                                                                                                | 263442_at   | 0.6 |
| unknown protein ; supported by full-length cDNA: Ceres: 552.                                                                                        | 263420_at   | 0.6 |
| unknown protein Similar to gb U51990 pre-mRNA-splicing factor hPrp18 from Homo sapiens. ESTs gb T46391 and gb AA721815 come from this gene          | 263116_s_at | 0.6 |
| putative bZIP transcription factor contains a bZIP transcription factor basic domain signature (PDOC00036); supported by cDNA: gi_14335073_gb_A     | 263064_at   | 0.6 |
| trehalose 6-phosphate synthase, putative similar to trehalose 6-phosphate synthase GB:CAA09463 GI:3647365 from [Yarrowia lipolytica]                | 263019_at   | 0.6 |
| hypothetical protein predicted by genemark.hmm                                                                                                      | 262992_at   | 0.6 |
| hypothetical protein predicted by genemark.hmm; supported by cDNA: gi_13605620_gb_AF361636.1_AF361636                                               | 262965_at   | 0.6 |
| unknown protein ESTs gb H37032, gb R6425, gb Z34651, gb N37268, gb AA713172 and gb Z34241 come from this gene;supported by full-length c            | 262600_at   | 0.6 |
| unknown protein ESTs gb N96028, gb F14286, gb T20680, gb F14443, gb AA657300 and gb N65244 come from this gene; supported by cDNA: gi_              | 262505_at   | 0.6 |
| unknown protein ;supported by full-length cDNA: Ceres:33047.                                                                                        | 262399_at   | 0.6 |
| Expressed protein ; supported by full-length cDNA: Ceres: 10252.                                                                                    | 262338_at   | 0.6 |
| E2, ubiquitin-conjugating enzyme, putative similar to ubiquitin-conjugating enzyme GB:P35135 from [Lycopersicon esculentum]; supported by cDNA      | 262341_at   | 0.6 |
| putative cyclin similar to cyclin GB:4502627 from [Homo sapiens];supported by full-length cDNA: Ceres:33877.                                        | 262296_at   | 0.6 |
| unknown protein ;supported by full-length cDNA: Ceres:3024.                                                                                         | 262171_at   | 0.6 |
| hypothetical protein predicted by genemark.hmm                                                                                                      | 262182_at   | 0.6 |
| hypothetical protein predicted by genemark.hmm;supported by full-length cDNA: Ceres:463.                                                            | 262160_at   | 0.6 |
| unknown protein contains similarity to peroxin-2 GI:6103008 from [Pichia pastoris];supported by full-length cDNA: Ceres:96370.                      | 262114_at   | 0.6 |
| splicing factor Prp8, putative similar to splicing factor Prp8 GI:3661610 from [Homo sapiens]                                                       | 262068_at   | 0.6 |
| unknown protein                                                                                                                                     | 262014_at   | 0.6 |
| ribosomal protein L7, putative similar to ribosomal protein L7 GB:AAA03081 GI:307388 from [Homo sapiens]                                            | 261911_at   | 0.6 |
| ethylene responsive element binding factor 3 (AtERF3) identical to GB:O80339 GI:7531109 from [Arabidopsis thaliana]; supported by cDNA: gi_343      | 261874_at   | 0.6 |
| unknown protein ; supported by cDNA: gi_12083327_gb_AF332460.1_AF332460                                                                             | 261793_at   | 0.6 |
| unknown protein ; supported by full-length cDNA: Ceres: 20257.                                                                                      | 261723_at   | 0.6 |
| hypothetical protein predicted by genemark.hmm                                                                                                      | 261597_at   | 0.6 |

|                                                                                                                                                        |             |     |
|--------------------------------------------------------------------------------------------------------------------------------------------------------|-------------|-----|
| hypothetical protein predicted by genemark.hmm                                                                                                         | 261500_at   | 0.6 |
| unknown protein contains similarity to DNA dependent reverse transcriptase GI:2920563 from [Spraguea lophii]                                           | 261426_at   | 0.6 |
| unknown protein contains similarity to set protein GI:338038 from [Homo sapiens];supported by full-length cDNA: Ceres:27467.                           | 261406_at   | 0.6 |
| unknown protein similar to 50S ribosomal protein L32; supported by full-length cDNA: Ceres: 10780.                                                     | 261268_at   | 0.6 |
| v-SNARE protein AtVT11b, putative similar to GB:AAF24062 from [Arabidopsis thaliana]; supported by cDNA: gi_6690275_gb_AF114751.1_AF1147               | 261276_at   | 0.6 |
| unknown protein ;supported by full-length cDNA: Ceres:3807.                                                                                            | 261154_at   | 0.6 |
| tropinone reductase-I, putative similar to GB:L20473 from [Datura stramonium] (Proc. Natl. Acad. Sci. U.S.A. 90, 9591-9595 (1993)); supported by c     | 261084_at   | 0.6 |
| unknown protein contains similarity to transaldolase GB:P30148 from [Escherichia coli];supported by full-length cDNA: Ceres:7590.                      | 260967_at   | 0.6 |
| histone H1, putative similar to histone H1-1 GB:CAA44312 GI:16314 from [Arabidopsis thaliana];supported by full-length cDNA: Ceres:24648.              | 260830_at   | 0.6 |
| unknown protein ;supported by full-length cDNA: Ceres:114093.                                                                                          | 260793_at   | 0.6 |
| unknown protein similar to hypothetical protein GI:7770340 from (Arabidopsis thaliana);supported by full-length cDNA: Ceres:114920.                    | 260766_at   | 0.6 |
| hypothetical protein predicted by genemark.hmm                                                                                                         | 260715_at   | 0.6 |
| hypothetical protein predicted by genemark.hmm;supported by full-length cDNA: Ceres:40884.                                                             | 260682_at   | 0.6 |
| unknown protein ;supported by full-length cDNA: Ceres:1402.                                                                                            | 260671_at   | 0.6 |
| unknown protein similar to putative cytoskeletal protein GI:1732517 from [Arabidopsis thaliana]; supported by cDNA: gi_1732516_gb_U62745.1_AT1         | 260638_at   | 0.6 |
| putative small nuclear ribonucleoprotein polypeptide F                                                                                                 | 260564_at   | 0.6 |
| hypothetical protein predicted by genefinder                                                                                                           | 260418_s_at | 0.6 |
| unknown protein                                                                                                                                        | 260375_at   | 0.6 |
| putative flavonol sulfotransferase similar to flavonol 4 -sulfotransferase GB:P52837 from [Flaveria chloraefolia];supported by full-length cDNA: Ceres | 260387_at   | 0.6 |
| unknown protein contains two Kelch motifs; supported by full-length cDNA: Ceres: 32885.                                                                | 260287_at   | 0.6 |
| gibberellin regulatory protein, putative similar to GB:CAA75492 from [Arabidopsis thaliana]; supported by cDNA: gi_15777856_gb_AY048749.1_             | 260141_at   | 0.6 |
| putative DnaJ protein similar to dnaJ-like protein GB:CAA72705 [Arabidopsis thaliana]; Pfam HMM hit:DnaJ, prokaryotic heat shock protein               | 259876_at   | 0.6 |
| auxin-induced protein, putative similar to SP:P33083 from [Glycine max];supported by full-length cDNA: Ceres:147801.                                   | 259787_at   | 0.6 |
| unknown protein                                                                                                                                        | 259497_at   | 0.6 |
| unknown protein supported by full-length cDNA: Ceres:29750.                                                                                            | 259378_at   | 0.6 |
| hypothetical protein C-term portion similar to unknown protein GB:AAC09350 [Homo sapiens]                                                              | 259336_at   | 0.6 |
| hypothetical protein predicted using genefinder;supported by full-length cDNA: Ceres:20442.                                                            | 259340_at   | 0.6 |
| unknown protein similar to hypothetical protein GB:AAC23643 [Arabidopsis thaliana]                                                                     | 259232_at   | 0.6 |
| unknown protein ; supported by full-length cDNA: Ceres: 29837.                                                                                         | 259236_at   | 0.6 |
| Expressed protein ; supported by full-length cDNA: Ceres: 20097.                                                                                       | 259214_at   | 0.6 |
| hypothetical protein predicted by genscan                                                                                                              | 259060_at   | 0.6 |
| unknown protein                                                                                                                                        | 259068_at   | 0.6 |
| unknown protein                                                                                                                                        | 258892_at   | 0.6 |
| hypothetical protein similar to symbiosis related proteins: GB:AAB53650 [Laccaria bicolor], GB:P87068 [Laccaria bicolor];supported by full-length cD   | 258880_at   | 0.6 |
| hypothetical protein predicted by genefinder;supported by full-length cDNA: Ceres:8992.                                                                | 258792_at   | 0.6 |
| hydroxyacylglutathione hydrolase cytoplasmic (glyoxalase II) (GLX II) identical to hydroxyacylglutathione hydrolase cytoplasmic (glyoxalase II) (GLX   | 258775_at   | 0.6 |
| unknown protein ;supported by full-length cDNA: Ceres:269248.                                                                                          | 258609_at   | 0.6 |
| putative tRNA pseudouridine synthase similar to tRNA pseudouridine synthase A GB:P07649 [Escherichia coli]                                             | 258538_at   | 0.6 |
| unknown protein ; supported by cDNA: gi_13878146_gb_AF370336.1_AF370336                                                                                | 258518_at   | 0.6 |
| importin alpha identical to GB:AAC27644 from [Arabidopsis thaliana] (Plant Cell (1996) 8(8), 1337-1352);supported by full-length cDNA: Ceres:9351      | 258531_at   | 0.6 |
| hypothetical protein predicted by genemark.hmm; supported by cDNA: gi_15450370_gb_AY052286.1_                                                          | 258501_at   | 0.6 |
| sterol-C5-desaturase identical to GB:AAD12944 from [Arabidopsis thaliana];supported by full-length cDNA: Ceres:7564.                                   | 258484_at   | 0.6 |

|                                                                                                                                                                    |             |     |
|--------------------------------------------------------------------------------------------------------------------------------------------------------------------|-------------|-----|
| expressed protein supported by cDNA: gi:14194102                                                                                                                   | 258444_at   | 0.6 |
| hypothetical protein similar to hypothetical protein GB:CAB57979 from [ <i>Lycopersicon esculentum</i> ]                                                           | 258406_at   | 0.6 |
| Expressed protein ; supported by full-length cDNA: Ceres: 29124.                                                                                                   | 258297_at   | 0.6 |
| protein kinase, putative similar to GB:BAA24694 from [ <i>Arabidopsis thaliana</i> ] (Plant Cell Physiol. 38 (3), 248-258 (1997));supported by full-length cDN     | 258132_at   | 0.6 |
| Expressed protein ; supported by full-length cDNA: Ceres: 7103.                                                                                                    | 258105_at   | 0.6 |
| hypothetical protein predicted by genemark;supported by full-length cDNA: Ceres:19279.                                                                             | 258091_at   | 0.6 |
| light regulated protein, putative similar to light regulated protein precursor GB:Q03200 [ <i>Oryza sativa</i> ] (Plant Mol. Biol. 22 (1), 165-170 (1993)), ccr pr | 257832_at   | 0.6 |
| hypothetical protein predicted by genemark.hmm                                                                                                                     | 257780_at   | 0.6 |
| hypothetical protein predicted by genemark.hmm                                                                                                                     | 257728_at   | 0.6 |
| unknown protein contains Pfam profiles: PF01388 ARID DNA binding domain, PF00505 HMG (high mobility group) box;supported by full-length cDN                        | 257655_at   | 0.6 |
| Expressed protein ; supported by full-length cDNA: Ceres: 642.                                                                                                     | 257609_at   | 0.6 |
| unknown protein similar to symbiosis-related proteins;supported by full-length cDNA: Ceres:2186.                                                                   | 257293_at   | 0.6 |
| unknown protein similar to DAG protein (required for chloroplast differentiation and palisade development) GB:Q38732 [ <i>Antirrhinum majus</i> ]; supporte        | 257218_at   | 0.6 |
| unknown protein ; supported by cDNA: gi_14190488_gb_AF380644.1_AF380644                                                                                            | 256799_at   | 0.6 |
| unknown protein contains Pfam profile: PF01165 ribosomal protein S21; supported by cDNA: gi_14532553_gb_AY039901.1_                                                | 256753_at   | 0.6 |
| DREB2B transcription factor identical to dehydration response element binding transcription factor DREB2B GB:BAA33795 [ <i>Arabidopsis thaliana</i> ]; su          | 256430_at   | 0.6 |
| hypothetical protein                                                                                                                                               | 256387_at   | 0.6 |
| unknown protein similar to N-term half of NAC domain protein NAM [ <i>Arabidopsis thaliana</i> ] GI:4325282;supported by full-length cDNA: Ceres:21634.            | 256300_at   | 0.6 |
| unknown protein ; supported by cDNA: gi_14334837_gb_AY035092.1_                                                                                                    | 256310_at   | 0.6 |
| unknown protein ; supported by cDNA: gi_15982827_gb_AY057521.1_                                                                                                    | 256270_at   | 0.6 |
| unknown protein ; supported by full-length cDNA: Ceres: 11684.                                                                                                     | 256231_at   | 0.6 |
| Expressed protein ; supported by full-length cDNA: Ceres: 25069.                                                                                                   | 256063_at   | 0.6 |
| unknown protein similar to putative prolyl 4-hydroxylase, alpha subunit GI:6598804 from [ <i>Arabidopsis thaliana</i> ];supported by full-length cDNA: Ceres       | 255883_at   | 0.6 |
| putative protein kinase contains a protein kinase domain profile (PDOC00100); supported by cDNA: gi_13448034_gb_AF339146.1_AF339146                                | 255872_at   | 0.6 |
| putative protein kinase contains a protein kinase domain profile (PDOC00100)                                                                                       | 255844_at   | 0.6 |
| putative protein vesicle-associated membrane protein 7B, <i>Arabidopsis thaliana</i> , AF025333                                                                    | 255803_at   | 0.6 |
| hypothetical protein predicted by genemark.hmm                                                                                                                     | 255759_at   | 0.6 |
| putative protein predicted protein, <i>Arabidopsis thaliana</i> and various predicted ATP dependent RNA helicases                                                  | 255600_s_at | 0.6 |
| putative protein various predicted proteins; supported by cDNA: gi_15809939_gb_AY054238.1_                                                                         | 255221_at   | 0.6 |
| putative protein hypothetical protein ssr1391 - <i>Synechocystis</i> sp. (strain PCC 6803),PIR2:S75571; supported by cDNA: gi_14190426_gb_AF378891                 | 255131_at   | 0.6 |
| MEKK1/MAP kinase kinase ; supported by cDNA: gi_1255447_dbj_D50468.1_ATHATMEKK1                                                                                    | 255095_at   | 0.6 |
| Expressed protein ; supported by full-length cDNA: Ceres: 11425.                                                                                                   | 254953_at   | 0.6 |
| RING-H2 finger protein RHA1b ;supported by full-length cDNA: Ceres:37097.                                                                                          | 254919_at   | 0.6 |
| putative protein zinc finger protein ZNF216 - <i>Mus musculus</i> , PID:g3643807;supported by full-length cDNA: Ceres:45.                                          | 254861_at   | 0.6 |
| ribosomal protein L13a like protein ribosomal protein L13a - <i>Lupinus luteus</i> ,PID:e1237871; supported by cDNA: gi_15529277_gb_AY052263.1_                    | 254763_at   | 0.6 |
| putative protein ; supported by cDNA: gi_16323185_gb_AY057697.1_                                                                                                   | 254764_at   | 0.6 |
| putative protein phospho-N-acetylmuramoyl-pentapeptide-transferase, <i>Haemophilus influenzae</i> ,Pir2:A64185                                                     | 254662_at   | 0.6 |
| putative NADPH quinone oxidoreductase Pig3 <i>Homo sapiens</i> , PID:G2754812;supported by full-length cDNA: Ceres:4621.                                           | 254393_at   | 0.6 |
| heat shock protein - like heat shock protein 17, <i>Triticum aestivum</i> , PIR1:HHWT17;supported by full-length cDNA: Ceres:23223.                                | 254384_at   | 0.6 |
| Ribosomal protein L7Ae - like NHP2/RS6 FAMILY PROTEIN, <i>Homo sapiens</i> , PID:g4826860                                                                          | 254355_at   | 0.6 |
| nifU-like protein nifU protein homolog YPL135w, <i>Saccharomyces cerevisiae</i> , PIR2:S69049;supported by full-length cDNA: Ceres:8156.                           | 254357_at   | 0.6 |
| Expressed protein ; supported by full-length cDNA: Ceres: 38360.                                                                                                   | 254279_at   | 0.6 |

|                                                                                                                                                       |           |     |
|-------------------------------------------------------------------------------------------------------------------------------------------------------|-----------|-----|
| hypothetical protein                                                                                                                                  | 254258_at | 0.6 |
| putative protein hypothetical protein, <i>Synechocystis</i> sp., PIR:S76577;supported by full-length cDNA: Ceres:30708.                               | 254187_at | 0.6 |
| Expressed protein ; supported by full-length cDNA: Ceres: 37704.                                                                                      | 254208_at | 0.6 |
| putative protein other <i>Arabidopsis</i> putative proteins                                                                                           | 254051_at | 0.6 |
| grpE like protein ;supported by full-length cDNA: Ceres:35284.                                                                                        | 253949_at | 0.6 |
| GH3 like protein GH3 protein, <i>Glycine max.</i> , PIR2:S17433                                                                                       | 253908_at | 0.6 |
| putative protein stem-specific protein - <i>Nicotiana tabacum</i> ,PID:g20037;supported by full-length cDNA: Ceres:35207.                             | 253874_at | 0.6 |
| putative protein ;supported by full-length cDNA: Ceres:11590.                                                                                         | 253823_at | 0.6 |
| Expressed protein ; supported by full-length cDNA: Ceres: 31814.                                                                                      | 253825_at | 0.6 |
| putative protein ;supported by full-length cDNA: Ceres:10077.                                                                                         | 253814_at | 0.6 |
| putative protein putative NADH oxidoreductase complex I subunit - <i>Caenorhabditis elegans</i> ,PID:g5019819                                         | 253712_at | 0.6 |
| ribosomal protein S15a homolog ribosomal protein S15a - <i>Brassica napus</i> ,PIR2:S20945; supported by full-length cDNA: Ceres: 18105.              | 253726_at | 0.6 |
| hypothetical protein ;supported by full-length cDNA: Ceres:117732.                                                                                    | 253642_at | 0.6 |
| hypothetical protein ;supported by full-length cDNA: Ceres:31287.                                                                                     | 253546_at | 0.6 |
| Expressed protein ; supported by cDNA: gi_13926316_gb_AF372908.1_AF372908                                                                             | 253482_at | 0.6 |
| putative protein                                                                                                                                      | 253455_at | 0.6 |
| nucellin -like protein nucellin - <i>Hordeum vulgare</i> ,PIR:G2290202;supported by full-length cDNA: Ceres:24738.                                    | 253331_at | 0.6 |
| putative protein auxin-induced protein, <i>Helianthus annuus</i> , gb:AF030301; supported by cDNA: gi_15215697_gb_AY050377.1_                         | 253307_at | 0.6 |
| predicted protein                                                                                                                                     | 253281_at | 0.6 |
| putative protein hydroxyproline-rich glycoprotein precursor, <i>Nicotiana tabacum</i> , PIR2:S06733; supported by cDNA: gi_15724315_gb_AF412098.1_    | 253284_at | 0.6 |
| amine oxidase -like protein amine oxidase, <i>Canavalia lineata</i> , EMBL:AF172681                                                                   | 252698_at | 0.6 |
| dnaJ protein homolog atj3 ;supported by full-length cDNA: Ceres:40976.                                                                                | 252670_at | 0.6 |
| putative protein tRNA intron endonuclease - <i>Arabidopsis thaliana</i> , EMBL:AB036339; supported by cDNA: gi_6635255_dbj_AB036339.1_AB036339        | 252593_at | 0.6 |
| putative protein CDP-alcohol phosphatidyltransferase - <i>Schizosaccharomyces pombe</i> , EMBL:CAB16578                                               | 252540_at | 0.6 |
| ABC-type transport protein-like protein AbcA, <i>Dictyostelium discoideum</i> , DDU66526                                                              | 252379_at | 0.6 |
| Expressed protein ; supported by cDNA: gi_14326548_gb_AF385728.1_AF385728                                                                             | 252390_at | 0.6 |
| Expressed protein ; supported by full-length cDNA: Ceres: 26537.                                                                                      | 252366_at | 0.6 |
| RNA-directed RNA polymerase RNA-directed RNA polymerase                                                                                               | 252261_at | 0.6 |
| mucin -like protein hemomucin, <i>Drosophila melanogaster</i> , EMBL:DM42014;supported by full-length cDNA: Ceres:34197.                              | 252117_at | 0.6 |
| putative protein hypothetical protein F10M6.70 - <i>Arabidopsis thaliana</i> ,PIR3:T05399; supported by cDNA: gi_15293266_gb_AY051067.1_              | 252040_at | 0.6 |
| putative protein predicted proteins, <i>Arabidopsis thaliana</i> ;supported by full-length cDNA: Ceres:108517.                                        | 251957_at | 0.6 |
| putative protein patatin, <i>Solanum tuberosum</i> , PIR2:A29810                                                                                      | 251839_at | 0.6 |
| E2, ubiquitin-conjugating enzyme 14 (UBC14) UbcAT3; identical to gi:2129757, S46656; supported by full-length cDNA: Ceres:25382.                      | 251802_at | 0.6 |
| transcription factor L2 ;supported by full-length cDNA: Ceres:105441.                                                                                 | 251758_at | 0.6 |
| putative protein several hypothetical proteins - <i>Arabidopsis thaliana</i>                                                                          | 251525_at | 0.6 |
| putative protein hypothetical proteins - <i>Arabidopsis thaliana</i> ; supported by cDNA: gi_14334587_gb_AY034967.1_                                  | 251356_at | 0.6 |
| Sar1-like GTP binding protein small GTP-binding protein Bsar1a - <i>Brassica campestris</i> , EMBL:U55035                                             | 251217_at | 0.6 |
| alpha galactosyltransferase-like protein alpha galactosyltransferase - <i>Trigonella foenum-graecum</i> , EMBL:TFO245478; supported by cDNA: gi_1598: | 251192_at | 0.6 |
| putative protein salt-inducible protein, membrane-associated, common tobacco, PIR:T02047; supported by cDNA: gi_15810430_gb_AY056254.1_               | 250856_at | 0.6 |
| putative protein strong similarity to unknown protein (gb AAF19572.1); supported by cDNA: gi_16649096_gb_AY059918.1_                                  | 250819_at | 0.6 |
| putative protein strong similarity to unknown protein (pir T12704)                                                                                    | 250745_at | 0.6 |
| cytochrome P450 90A1 (sp Q42569) ; supported by full-length cDNA: Ceres: 36334.                                                                       | 250752_at | 0.6 |

|                                                                                                                                                 |             |     |
|-------------------------------------------------------------------------------------------------------------------------------------------------|-------------|-----|
| putative protein similar to unknown protein (pir T00468)                                                                                        | 250713_at   | 0.6 |
| harpin-induced protein-like ; supported by cDNA: gi_9502175_gb_AF264699.1_AF264699                                                              | 250676_at   | 0.6 |
| RNA binding protein - like rna binding protein, Schizosaccharomyces pombe, PIR:T39586                                                           | 250436_at   | 0.6 |
| putative protein various predicted proteins, Drosophila melanogaster, Caenorhabditis elegans, Homo sapiens; supported by full-length cDNA: Cere | 250384_at   | 0.6 |
| Expressed protein ; supported by full-length cDNA: Ceres: 13951.                                                                                | 250225_at   | 0.6 |
| putative protein similar to unknown protein (gb AAF02163.1);supported by full-length cDNA: Ceres:115644.                                        | 250127_at   | 0.6 |
| unknown protein                                                                                                                                 | 250017_at   | 0.6 |
| eukaryotic cap-binding protein (gb AAC17220.1) ; supported by cDNA: gi_3108208_gb_AF028809.1_AF028809                                           | 250033_at   | 0.6 |
| 6-phosphogluconolactonase-like protein ;supported by full-length cDNA: Ceres:21890.                                                             | 249733_at   | 0.6 |
| thaumatin-like protein                                                                                                                          | 249748_at   | 0.6 |
| unknown protein                                                                                                                                 | 249726_at   | 0.6 |
| Expressed protein ; supported by cDNA: gi_14190358_gb_AF378857.1_AF378857                                                                       | 249650_at   | 0.6 |
| 40S ribosomal protein S9-like 40S ribosomal protein S9 - Chlamydomonas sp.,EMBL:AU066528;supported by full-length cDNA: Ceres:41408.            | 249427_at   | 0.6 |
| putative protein predicted protein, Arabidopsis thaliana;supported by full-length cDNA: Ceres:26524.                                            | 249379_at   | 0.6 |
| putative protein contains similarity to metallothionein-I gene transcription activator                                                          | 249335_at   | 0.6 |
| putative protein similar to unknown protein (gb AAF16660.1);supported by full-length cDNA: Ceres:4267.                                          | 249234_at   | 0.6 |
| ubiquitin-like protein ; supported by cDNA: gi_13899064_gb_AF370527.1_AF370527                                                                  | 249217_at   | 0.6 |
| Rab-type small GTP-binding protein-like ; supported by full-length cDNA: Ceres: 102017.                                                         | 248914_at   | 0.6 |
| putative protein similar to unknown protein (gb AAC61815.1);supported by full-length cDNA: Ceres:254442.                                        | 248868_at   | 0.6 |
| putative protein contains similarity to maturase-related protein                                                                                | 248815_at   | 0.6 |
| Bax inhibitor-1 like ;supported by full-length cDNA: Ceres:36400.                                                                               | 248833_at   | 0.6 |
| putative protein similar to unknown protein (gb AAF30317.1);supported by full-length cDNA: Ceres:101665.                                        | 248586_at   | 0.6 |
| ATP-dependent Clp protease ATP-binding subunit (ClpC1) almost identical to ClpC GI:2921158 from [Arabidopsis thaliana]                          | 248480_at   | 0.6 |
| putative protein contains similarity to iron-containing superoxide dismutase;supported by full-length cDNA: Ceres:126592.                       | 248493_at   | 0.6 |
| putative protein similar to unknown protein (gb AAD29711.1)                                                                                     | 248437_at   | 0.6 |
| putative protein contains similarity to transcription or splicing factor; supported by cDNA: gi_13877738_gb_AF370132.1_AF370132                 | 248452_at   | 0.6 |
| unknown protein                                                                                                                                 | 248415_at   | 0.6 |
| putative protein similar to unknown protein (pir T34137)                                                                                        | 248266_at   | 0.6 |
| cytochrome b5 (dbj BAA74839.1) ;supported by full-length cDNA: Ceres:31303.                                                                     | 248217_at   | 0.6 |
| putative protein contains similarity to RNA-binding protein; supported by full-length cDNA: Ceres: 14044.                                       | 248173_at   | 0.6 |
| 50S ribosomal protein L24, chloroplast precursor ;supported by full-length cDNA: Ceres:27973.                                                   | 248174_at   | 0.6 |
| 30S ribosomal protein S16 ; supported by full-length cDNA: Ceres: 20539.                                                                        | 247935_at   | 0.6 |
| unknown protein                                                                                                                                 | 247950_at   | 0.6 |
| putative protein ; supported by full-length cDNA: Ceres: 36602.                                                                                 | 247801_at   | 0.6 |
| elongin - like protein elongin C, Drosophila melanogaster, PIR:JC5794; supported by cDNA: gi_15028384_gb_AY045995.1_                            | 247721_at   | 0.6 |
| thymidylate kinase - like protein thymidylate kinase, Arabidopsis thaliana, EMBL:AF081570;supported by full-length cDNA: Ceres:155539.          | 247735_at   | 0.6 |
| putative protein supported by cDNA: Ceres: 146274.                                                                                              | 247491_at   | 0.6 |
| putative protein predicted proteins, Arabidopsis thaliana; supported by cDNA: gi_13877822_gb_AF370174.1_AF370174                                | 247407_at   | 0.6 |
| expressed protein similar to unknown protein (gb AAF03448.1); supported by full-length cDNA: Ceres: 97900.                                      | 247258_at   | 0.6 |
| unknown protein ;supported by full-length cDNA: Ceres:25419.                                                                                    | 247149_at   | 0.6 |
| putative protein strong similarity to unknown protein (pir T04718); supported by cDNA: gi_15529177_gb_AY052213.1_                               | 247013_at   | 0.6 |
| transcription factor-like protein light-induced protein CPRF-2 - Petroselinum crispum, PIR:S16321                                               | 246962_s_at | 0.6 |



|                                                                                                                                                                                    |              |     |
|------------------------------------------------------------------------------------------------------------------------------------------------------------------------------------|--------------|-----|
| putative protein seven transmembrane domain orphan receptor, <i>Mus musculus</i> , EMBL:AF051098;supported by full-length cDNA: Ceres:96808.                                       | 246793_at    | 0.6 |
| putative protein                                                                                                                                                                   | 246737_at    | 0.6 |
| CRS2-like protein CRS2 - <i>Zea mays</i> , EMBL:AF225708                                                                                                                           | 246492_at    | 0.6 |
| arginine/serine-rich protein, putative similar to arginine/serine-rich protein GI:6601502 from [ <i>Arabidopsis thaliana</i> ]; supported by cDNA: gi_15027956                     | 246324_at    | 0.6 |
| SOH1 - like protein SOH1, <i>Saccharomyces cerevisiae</i> , PIR:S47895                                                                                                             | 246140_at    | 0.6 |
| putative protein predicted protein, <i>Arabidopsis thaliana</i> ;supported by full-length cDNA: Ceres:32193.                                                                       | 246154_at    | 0.6 |
| putative protein DIM1 protein, <i>Homo sapiens</i> , EMBL:AF023611; supported by full-length cDNA: Ceres: 12591.                                                                   | 246006_at    | 0.6 |
| Expressed protein ; supported by full-length cDNA: Ceres: 31366.                                                                                                                   | 246007_at    | 0.6 |
| elongation factor 1B alpha-subunit ;supported by full-length cDNA: Ceres:26936.                                                                                                    | 245949_at    | 0.6 |
| hypothetical protein                                                                                                                                                               | 245501_at    | 0.6 |
| dynein light chain like protein                                                                                                                                                    | 245525_at    | 0.6 |
| allergen like protein                                                                                                                                                              | 245463_at    | 0.6 |
| Expressed protein ; supported by full-length cDNA: Ceres: 5455.                                                                                                                    | 245334_at    | 0.6 |
| DEF (CLA1) protein ; supported by cDNA: gi_14334451_gb_AY034917.1_                                                                                                                 | 245281_at    | 0.6 |
| gunknown protein contains non-consensus TG donor splice site at exon 1                                                                                                             | 245227_s_at  | 0.6 |
| unknown protein                                                                                                                                                                    | 245134_s_at  | 0.6 |
| PSII component                                                                                                                                                                     | 245021_at    | 0.6 |
| PSII cytochrome b559                                                                                                                                                               | 244964_at    | 0.6 |
| cytochrome c biogenesis orf382 Protein sequence is in conflict with the conceptual translation                                                                                     | 244912_at    | 0.6 |
| hypothetical protein                                                                                                                                                               | 257334_at    | 0.6 |
| unknown protein                                                                                                                                                                    | 257495_at    | 0.6 |
| putative protein hypothetical protein, <i>Synechocystis sp.</i> , PIR2:S76637                                                                                                      | 254715_at    | 0.6 |
| putative protein predicted protein, <i>Arabidopsis thaliana</i>                                                                                                                    | 246586_at    | 0.6 |
| hypothetical protein predicted by genscan;supported by full-length cDNA: Ceres:4845.                                                                                               | 265333_at    | 0.5 |
| HD-Zip protein identical to HD-Zip protein GB:CAA71854 GI:2145358 from [ <i>Arabidopsis thaliana</i> ]                                                                             | 261800_at    | 0.5 |
| hypothetical protein predicted by genemark.hmm; supported by cDNA: gi_15451209_gb_AY054685.1_                                                                                      | 260987_at    | 0.5 |
| unknown protein similar to brahma associated protein GB:AAC28455 ( <i>Drosophila melanogaster</i> ), SWI SNF-related matrix-associated actin-depende                               | 258974_at    | 0.5 |
| hypothetical protein predicted by genscan+                                                                                                                                         | 257073_at    | 0.5 |
| putative protein hypothetical protein F9F8.14 - <i>Arabidopsis thaliana</i> , EMBL:AC009991                                                                                        | 251348_at    | 0.5 |
| J04423 <i>E coli</i> bioD gene dethiobiotin synthetase (-5 and -3 represent transcript regions 5 prime and 3 prime respectively)                                                   | FFX-BioDn-5_ | 0.5 |
| <i>Escherichia coli</i> /REF=J04423 /DEF= <i>E coli</i> bioD gene dethiobiotin synthetase corresponding to nucleotides 5024-5244 of J04423 /LEN=676 (-5 and X-r2- <i>Ec</i> -bioD- |              | 0.5 |
| <i>Arabidopsis thaliana</i> /REF=U84969 /DEF=ubiquitin (UBQ11) gene, complete cds /LEN=1140 (_5, _M, _3 represent transcript regions 5 prime, MiddK-Athal-Ubq_3                    |              | 0.5 |
| putative phosphoribosyl pyrophosphate synthetase                                                                                                                                   | 267365_at    | 0.5 |
| putative isoamylase                                                                                                                                                                | 267356_at    | 0.5 |
| putative RING zinc finger protein ;supported by full-length cDNA: Ceres:17402.                                                                                                     | 267297_at    | 0.5 |
| Expressed protein ; supported by full-length cDNA: Ceres: 14468.                                                                                                                   | 267259_at    | 0.5 |
| unknown protein ; supported by cDNA: gi_14335015_gb_AY037187.1_                                                                                                                    | 266982_at    | 0.5 |
| hypothetical protein predicted by genscan                                                                                                                                          | 266901_at    | 0.5 |
| F-box protein family, AtFBX5 contains similarity to F-box protein FBL2 GI:6010699 from [ <i>Rattus norvegicus</i> ]                                                                | 266815_at    | 0.5 |
| putative RNA-binding protein                                                                                                                                                       | 266715_at    | 0.5 |
| putative CCCH-type zinc finger protein identical to GB:U81238;supported by full-length cDNA: Ceres:39893.                                                                          | 266656_at    | 0.5 |
| unknown protein ; supported by cDNA: gi_16226795_gb_AF428334.1_AF428334                                                                                                            | 266468_at    | 0.5 |

|                                                                                                                                                     |             |     |
|-----------------------------------------------------------------------------------------------------------------------------------------------------|-------------|-----|
| putative nonspecific lipid-transfer protein ; supported by cDNA: gi_15146309_gb_AY049296.1_                                                         | 266421_at   | 0.5 |
| unknown protein                                                                                                                                     | 266366_at   | 0.5 |
| putative RGA1, gibberellin response modulation protein identical to GB:Y11336, member of SCARECROW family; supported by cDNA: gi_15529229_          | 266331_at   | 0.5 |
| putative beta-ketoacyl-CoA synthase                                                                                                                 | 266319_s_at | 0.5 |
| hypothetical protein predicted by genscan                                                                                                           | 266247_at   | 0.5 |
| Expressed protein ; supported by full-length cDNA: Ceres: 112146.                                                                                   | 266264_at   | 0.5 |
| unknown protein ; supported by cDNA: gi_13358176_gb_AF324984.2_AF324984                                                                             | 266207_at   | 0.5 |
| unknown protein                                                                                                                                     | 266192_at   | 0.5 |
| unknown protein                                                                                                                                     | 266193_at   | 0.5 |
| putative alcohol dehydrogenase                                                                                                                      | 266087_at   | 0.5 |
| putative small nuclear ribonucleoprotein E ;supported by full-length cDNA: Ceres:24619.                                                             | 266074_at   | 0.5 |
| putative preprotein translocase SECY protein identical to GB:U37247; targeted to the thylakoid membrane; the protein has a chloroplast targeting si | 266018_at   | 0.5 |
| putative spliceosome associated protein ;supported by full-length cDNA: Ceres:38968.                                                                | 265930_at   | 0.5 |
| ubiquitin-like (UBQ7), putative similar to GI:304119                                                                                                | 265825_at   | 0.5 |
| Expressed protein ; supported by full-length cDNA: Ceres: 157460.                                                                                   | 265770_at   | 0.5 |
| 12-oxophytodienoate-10,11-reductase ; supported by cDNA: gi_15294261_gb_AF410322.1_AF410322                                                         | 265530_at   | 0.5 |
| putative photosystem I reaction center subunit IV ;supported by full-length cDNA: Ceres:27629.                                                      | 265287_at   | 0.5 |
| hypothetical protein predicted by genefinder; supported by full-length cDNA: Ceres: 91902.                                                          | 265258_at   | 0.5 |
| unknown protein ; supported by full-length cDNA: Ceres: 14111.                                                                                      | 265281_at   | 0.5 |
| unknown protein                                                                                                                                     | 265142_at   | 0.5 |
| unknown protein ; supported by full-length cDNA: Ceres: 12055.                                                                                      | 265149_at   | 0.5 |
| putative zinc finger protein similar to zinc finger protein, 207 GB:4508017 from [Homo sapiens], similar to ESTs gb N38677 and gb H77073;supporte   | 265129_at   | 0.5 |
| NBS/LRR disease resistance protein, putative similar to NBS/LRR disease resistance protein GB:AAC26125 GI:3309619 from [Arabidopsis thaliana        | 265109_s_at | 0.5 |
| unknown protein similar to small zinc finger-like protein GI:5107149 from [Oryza sativa]; supported by full-length cDNA: Ceres: 21075.              | 265006_at   | 0.5 |
| unknown protein similar to hypothetical protein GB:AAD11584;supported by full-length cDNA: Ceres:123030.                                            | 264836_at   | 0.5 |
| unknown protein location of EST gb H36530, gb AA395402, and gb T43793                                                                               | 264772_at   | 0.5 |
| unknown protein similar to putative glycosyl transferase GI:7268597 from [Arabidopsis thaliana]; supported by cDNA: gi_13878002_gb_AF370264.1_      | 264704_at   | 0.5 |
| putative chloroplast 50S ribosomal protein, L6 Similar to Mycobacterium RlpF (gb Z84395). ESTs gb T75785,gb R30580,gb T04698 come from this         | 264575_at   | 0.5 |
| unknown protein similar to multiple exostoses type II protein EXT2.I (U72263); similar to ESTs dbj D39982, gb L37635, and dbj C28418                | 264493_at   | 0.5 |
| putative glutathione S-transferase TSI-1 similar to glutathione S-transferase (sp Q03666 GTX4_TOBAC); similar to EST gb H36275; supported by c[     | 264435_at   | 0.5 |
| hypothetical protein contains similarity to F-box protein Fbx7 GI:6164624 from [Homo sapiens]                                                       | 264336_at   | 0.5 |
| unknown protein ESTs gb T04610, gb N38459, gb T45174, gb R30481 and gb N64971 come from this gene;supported by full-length cDNA: Ceres:9            | 264264_at   | 0.5 |
| unknown protein contains similarity to tryparedoxin GI:3851498 from [Crithidia fasciculata];supported by full-length cDNA: Ceres:34936.             | 264219_at   | 0.5 |
| putative cyclin-dependent kinase regulatory subunit ;supported by full-length cDNA: Ceres:5750.                                                     | 264070_at   | 0.5 |
| putative cyclin D                                                                                                                                   | 264043_at   | 0.5 |
| unknown protein                                                                                                                                     | 264054_at   | 0.5 |
| putative triosephosphate isomerase ;supported by full-length cDNA: Ceres:39351.                                                                     | 264018_at   | 0.5 |
| Expressed protein ; supported by full-length cDNA: Ceres: 20090.                                                                                    | 264023_at   | 0.5 |
| putative WD-40 repeat protein                                                                                                                       | 263824_at   | 0.5 |
| putative putative 60S ribosomal protein L17 identical to GB:AAB80655; supported by full-length cDNA: Ceres: 4513.                                   | 263665_at   | 0.5 |
| unknown protein                                                                                                                                     | 263638_at   | 0.5 |
| putative fatty acid elongase ;supported by full-length cDNA: Ceres:115769.                                                                          | 263443_at   | 0.5 |

|                                                                                                                                                                                         |             |     |
|-----------------------------------------------------------------------------------------------------------------------------------------------------------------------------------------|-------------|-----|
| putative glyoxalase II                                                                                                                                                                  | 263243_at   | 0.5 |
| Expressed protein ; supported by full-length cDNA: Ceres: 27081.                                                                                                                        | 263182_at   | 0.5 |
| jasmonate inducible protein, putative similar to jasmonate inducible protein GI:9279638 from [Arabidopsis thaliana]                                                                     | 263174_at   | 0.5 |
| putative peroxisome assembly factor-2 Belongs to PF 00004 ATPases associated with various cellular activities                                                                           | 263170_at   | 0.5 |
| unknown protein EST gb F14156 comes from this gene;supported by full-length cDNA: Ceres:16491.                                                                                          | 262821_at   | 0.5 |
| ATP-dependent Clp protease proteolytic subunit (ClpP6) identical to ATP-dependent Clp protease proteolytic subunit GI:2827888 from [Arabidopsis thaliana]                               | 262823_at   | 0.5 |
| hypothetical protein ;supported by full-length cDNA: Ceres:2663.                                                                                                                        | 262678_at   | 0.5 |
| unknown protein                                                                                                                                                                         | 262618_at   | 0.5 |
| hypothetical protein Similar to gi 4377403 Polypeptide Deformylase from Chlamydia pneumoniae genome gb AE001687; supported by cDNA: gi_113                                              | 262573_at   | 0.5 |
| unknown protein EST gb AA586241 comes from this gene                                                                                                                                    | 262488_at   | 0.5 |
| unknown protein ; supported by full-length cDNA: Ceres:37444.                                                                                                                           | 262496_at   | 0.5 |
| threonine synthase, putative similar to threonine synthase GI:4850369 from [Arabidopsis thaliana]                                                                                       | 262380_at   | 0.5 |
| Expressed protein ; supported by full-length cDNA: Ceres: 97474.                                                                                                                        | 262340_at   | 0.5 |
| Niemann-Pick C disease protein-like protein similar to Niemann-Pick C disease protein GB:AAB63982 GI:2276463 from [Homo sapiens]                                                        | 262264_at   | 0.5 |
| unknown protein contains similarity to 1-aminocyclopropane-1-carboxylate deaminases                                                                                                     | 262247_at   | 0.5 |
| DNA binding protein, putative similar to GB:BAA23142 GI:2580438 from [Oryza sativa]; supported by cDNA: gi_15912302_gb_AY056429.1_                                                      | 262028_at   | 0.5 |
| hypothetical protein predicted by genscan+;supported by full-length cDNA: Ceres:1981.                                                                                                   | 261938_at   | 0.5 |
| J8-like protein similar to DnaJ homologue J8 GB:AAC72399 GI:3851670 from [Arabidopsis thaliana];supported by full-length cDNA: Ceres:4150.                                              | 261901_at   | 0.5 |
| unknown protein ; supported by full-length cDNA: Ceres: 42087.                                                                                                                          | 261902_at   | 0.5 |
| unknown protein contains similarity to autocrine motility factor receptor GI:5931955 from [Homo sapiens]                                                                                | 261904_at   | 0.5 |
| pirin-like protein similar to pirin GB:AAF22236 GI:6651245 from [Lycopersicon esculentum]                                                                                               | 261876_at   | 0.5 |
| thioredoxin h, putative similar to thioredoxin h GI:4928460 from [Hevea brasiliensis];supported by full-length cDNA: Ceres:2054.                                                        | 261821_at   | 0.5 |
| unknown protein ;supported by full-length cDNA: Ceres:113571.                                                                                                                           | 261822_at   | 0.5 |
| unknown protein                                                                                                                                                                         | 261843_at   | 0.5 |
| hypothetical protein contains similarity to preprotein translocase GB:AAF28359 GI:6760455 from [Mus musculus]                                                                           | 261664_s_at | 0.5 |
| unknown protein ;supported by full-length cDNA: Ceres:33310.                                                                                                                            | 261677_at   | 0.5 |
| hypothetical protein contains similarity to cockayne syndrome complementation group A protein GB:U28413 GI:975301 from (Homo sapiens)                                                   | 261644_s_at | 0.5 |
| putative lipase similar to hypothetical protein GB:AAF24946 GI:6693020 from [Arabidopsis thaliana];supported by full-length cDNA: Ceres:118034.                                         | 261646_at   | 0.5 |
| ribosomal protein L9, putative similar to RIBOSOMAL PROTEIN L9 GB:P49209 from [Arabidopsis thaliana]                                                                                    | 261620_s_at | 0.5 |
| unknown protein                                                                                                                                                                         | 261572_at   | 0.5 |
| peroxidase ATP4a identical to GB:CAA67309 GI:1429213 from [Arabidopsis thaliana]; supported by full-length cDNA: Ceres: 39968.                                                          | 261518_at   | 0.5 |
| hypothetical protein predicted by genemark.hmm;supported by full-length cDNA: Ceres:9495.                                                                                               | 261487_at   | 0.5 |
| unknown protein                                                                                                                                                                         | 261422_at   | 0.5 |
| unknown protein similar to YGL010w-like protein GI:2982301 from [Picea mariana]; supported by cDNA: gi_15809883_gb_AY054209.1_                                                          | 261379_at   | 0.5 |
| dihydroxyacetone kinase, putative similar to GB:U09771 from [Citrobacter freundii]                                                                                                      | 261294_at   | 0.5 |
| hypothetical protein predicted by genemark.hmm                                                                                                                                          | 261301_at   | 0.5 |
| unknown protein ; supported by cDNA: gi_15450636_gb_AY052686.1_                                                                                                                         | 261193_at   | 0.5 |
| uridine diphosphate glucose epimerase identical to GB:CAA90941 from [Arabidopsis thaliana] (Arch. Biochem. Biophys. 327 (1), 27-34 (1996)); supported by full-length cDNA: Ceres:33426. | 261211_at   | 0.5 |
| unknown protein ;supported by full-length cDNA: Ceres:33426.                                                                                                                            | 261076_at   | 0.5 |
| unknown protein identical to SP:O50061 from [Arabidopsis thaliana];supported by full-length cDNA: Ceres:12704.                                                                          | 261078_at   | 0.5 |
| hypothetical protein predicted by genemark.hmm; supported by full-length cDNA: Ceres: 19263.                                                                                            | 260983_at   | 0.5 |
| peroxisomal targeting signal type 2 receptor almost identical to peroxisomal targeting signal type 2 receptor GB:AAD27848 GI:4689316 from [Arabidopsis thaliana]                        | 260844_at   | 0.5 |

|                                                                                                                                                       |           |     |
|-------------------------------------------------------------------------------------------------------------------------------------------------------|-----------|-----|
| unknown protein ; supported by cDNA: gi_16604612_gb_AY059751.1_                                                                                       | 260747_at | 0.5 |
| Expressed protein ; supported by full-length cDNA: Ceres: 6907.                                                                                       | 260650_at | 0.5 |
| putative MYB family transcription factor similar to GB:AAD33584 from [Arabidopsis thaliana] (Plant Mol. Biol. 40 (4), 579-590 (1999)); supported by c | 260652_at | 0.5 |
| glyoxalase I, putative similar to GB:Y13239 from [Brassica juncea] (Plant J. 17 (4), 385-395 (1999))                                                  | 260619_at | 0.5 |
| unknown protein contains similarity to tub homolog GI:2072160 from [Homo sapiens]; supported by cDNA: gi_13877766_gb_AF370146.1_AF370146              | 260588_at | 0.5 |
| 60S ribosomal protein L38                                                                                                                             | 260538_at | 0.5 |
| unknown protein ; supported by full-length cDNA: Ceres: 2381.                                                                                         | 260442_at | 0.5 |
| hypothetical protein predicted by genscan+, similar to adenosine kinase (EC 2.7.1.20) GB:S52758 from [Leishmania donovani];supported by full-len      | 260388_at | 0.5 |
| receptor protein kinase, putative similar to receptor protein kinase GI:1389566 from (Arabidopsis thaliana); supported by cDNA: gi_4204848_gb_U5      | 260345_at | 0.5 |
| unknown protein similar to putative protein GB:CAA20468 [Arabidopsis thaliana]                                                                        | 260314_at | 0.5 |
| putative ribosomal protein similar to ribosomal protein L33B GB:NP_014877 from [Saccharomyces cerevisiae]; supported by full-length cDNA: Ceres       | 260258_at | 0.5 |
| GAST1-like protein similar to GAST1 protein precursor GB:P27057 [Lycopersicon esculentum] (induced by gibberellins, inhibited by ABA Plant J 19       | 260221_at | 0.5 |
| leucine-rich repeat transmembrane protein kinase 1, putative similar to GI:3360289 from [Zea mays] (Plant Mol. Biol. 37 (5), 749-761 (1998))          | 259958_at | 0.5 |
| GRAB1-like protein similar to GRAB1 protein GB:CAA09371, a novel member of the NAC domain family;supported by full-length cDNA: Ceres:3647            | 259705_at | 0.5 |
| replication factor, putative similar to GI:4972952 from [Mus musculus] (Mamm. Genome (2000) In press)                                                 | 259690_at | 0.5 |
| hypothetical protein ; supported by cDNA: gi_15081631_gb_AY048208.1_                                                                                  | 259516_at | 0.5 |
| unknown protein ;supported by full-length cDNA: Ceres:17287.                                                                                          | 259267_at | 0.5 |
| putative cell division related protein similar to GIsA (required for asymmetric cell division) GB:AAD26632 [Volvox carteri f. nagariensis]            | 259284_at | 0.5 |
| hypothetical protein predicted by genefinder                                                                                                          | 259249_at | 0.5 |
| hypothetical protein predicted by genscan;supported by full-length cDNA: Ceres:9503.                                                                  | 259253_at | 0.5 |
| unknown protein similar to putative protein GB:CAB40986 [Arabidopsis thaliana];supported by full-length cDNA: Ceres:5170.                             | 259093_at | 0.5 |
| unknown protein ; supported by cDNA: gi_14334501_gb_AY034942.1_                                                                                       | 259103_at | 0.5 |
| putative RING zinc finger protein contains Pfam profile: PF00097 Zinc finger, C3HC4 type (RING finger)                                                | 258758_at | 0.5 |
| unknown protein ;supported by full-length cDNA: Ceres:38495.                                                                                          | 258606_at | 0.5 |
| unknown protein                                                                                                                                       | 258542_at | 0.5 |
| unknown protein ;supported by full-length cDNA: Ceres:9391.                                                                                           | 258511_at | 0.5 |
| unknown protein ;supported by full-length cDNA: Ceres:13305.                                                                                          | 258455_at | 0.5 |
| hypothetical protein predicted by genemark.hmm                                                                                                        | 258211_at | 0.5 |
| Expressed protein ; supported by full-length cDNA: Ceres: 15880.                                                                                      | 258135_at | 0.5 |
| hypothetical protein predicted genemark;supported by full-length cDNA: Ceres:255040.                                                                  | 258021_at | 0.5 |
| unknown protein ;supported by full-length cDNA: Ceres:92314.                                                                                          | 257925_at | 0.5 |
| hypothetical protein predicted by genemark.hmm;supported by full-length cDNA: Ceres:104278.                                                           | 257751_at | 0.5 |
| hypothetical protein contains Pfam profile: PF01535 domain of unknown function (3 copies)                                                             | 257765_at | 0.5 |
| unknown protein contains Pfam profile: PF00515 tetratricopeptide repeat domain (TPR domain);supported by full-length cDNA: Ceres:23733.               | 257730_at | 0.5 |
| hypothetical protein predicted by genemark.hmm                                                                                                        | 257741_at | 0.5 |
| hypothetical protein predicted by genemark.hmm; supported by cDNA: gi_16323108_gb_AY057658.1_                                                         | 257707_at | 0.5 |
| putative HLH DNA-binding protein contains Pfam profile: PF00010 helix-loop-helix DNA-binding domain;supported by full-length cDNA: Ceres:24788        | 257642_at | 0.5 |
| oligouridylylate binding protein, putative similar to GB:CAB75429 from [Nicotiana plumbaginifolia], contains Pfam profiles: PF00076 RNA recognition r | 257002_at | 0.5 |
| unknown protein                                                                                                                                       | 256927_at | 0.5 |
| hypothetical protein similar to DNA-directed RNA polymerase II 19 KD polypeptide (subunit 5) GB:P46279 [Glycine max];supported by full-length cD      | 256837_at | 0.5 |
| unknown protein ; supported by full-length cDNA: Ceres: 33058.                                                                                        | 256680_at | 0.5 |
| hypothetical protein ;supported by full-length cDNA: Ceres:38428.                                                                                     | 256568_at | 0.5 |

|                                                                                                                                                 |             |     |
|-------------------------------------------------------------------------------------------------------------------------------------------------|-------------|-----|
| hypothetical protein                                                                                                                            | 256518_at   | 0.5 |
| hypothetical protein predicted by genemark.hmm                                                                                                  | 256493_at   | 0.5 |
| hypothetical protein predicted by genemark.hmm;supported by full-length cDNA: Ceres:10873.                                                      | 256452_at   | 0.5 |
| hypothetical protein predicted by genscan+; supported by cDNA: gi_14334761_gb_AY035054.1_                                                       | 256426_at   | 0.5 |
| unknown protein ; supported by full-length cDNA: Ceres: 38207.                                                                                  | 256353_at   | 0.5 |
| unknown protein ; supported by cDNA: gi_15450991_gb_AY054576.1_                                                                                 | 256267_at   | 0.5 |
| unknown protein                                                                                                                                 | 256041_at   | 0.5 |
| unknown protein ; supported by cDNA: gi_15146333_gb_AY049308.1_                                                                                 | 256034_at   | 0.5 |
| hypothetical protein predicted by genscan+; supported by full-length cDNA: Ceres: 12511.                                                        | 256016_at   | 0.5 |
| putative PTR2 family peptide transporter                                                                                                        | 255877_at   | 0.5 |
| 40S ribosomal protein S26                                                                                                                       | 255819_s_at | 0.5 |
| putative PRP19-like spliceosomal protein WD-40 repeat protein                                                                                   | 255830_at   | 0.5 |
| p68 RNA helicase, putative similar to p68 RNA helicase (Schizosaccharomyces pombe) GI:173419                                                    | 255749_at   | 0.5 |
| scarecrow-like 6 (SCL6)                                                                                                                         | 255698_at   | 0.5 |
| Expressed protein ; supported by full-length cDNA: Ceres: 11036.                                                                                | 255659_at   | 0.5 |
| putative acetyltransferase similar to Digitalis lanata lanatoside 15 -O-acetyltransferase, GenBank accession number AJ011567                    | 255607_at   | 0.5 |
| putative ribosomal protein L19 similar to L19 from several species; supported by cDNA: gi_14423511_gb_AF386993.1_AF386993                       | 255520_at   | 0.5 |
| putative fibrillin ; supported by full-length cDNA: Ceres: 1461.                                                                                | 255364_s_at | 0.5 |
| coded for by A. thaliana cDNA T41604                                                                                                            | 255288_at   | 0.5 |
| ferredoxin--NADP+ reductase - like protein ferredoxin--NADP+ reductase, Pisum sativum, PIR:T06773;supported by full-length cDNA: Ceres:33486.   | 255230_at   | 0.5 |
| hypothetical protein                                                                                                                            | 255185_at   | 0.5 |
| putative protein predicted proteins, Arabidopsis thaliana;supported by full-length cDNA: Ceres:17600.                                           | 254372_at   | 0.5 |
| putative protein NADH oxidoreductase complex I subunit- like protein, Caenorhabditis elegans, AF143152                                          | 254378_at   | 0.5 |
| symbiosis-related like protein symbiosis-related protein, Laccaria bicolor,PATX:G2072023;supported by full-length cDNA: Ceres:14759.            | 254346_at   | 0.5 |
| putative ribosomal protein S10 40S ribosomal protein S10 - Lumbricus rubellus, PID:e1329701; supported by cDNA: gi_14334535_gb_AY035172.1_      | 254049_at   | 0.5 |
| putative protein RING zinc finger protein, Gallus gallus                                                                                        | 253958_at   | 0.5 |
| ubiquitin-like protein ubiquitin-like protein - Arabidopsis thaliana (thale cress), PID:e259962; supported by full-length cDNA: Ceres: 29414.   | 253952_at   | 0.5 |
| putative RING zinc finger protein Arabidopsis thaliana RMA1 mRNA, PID:d1029538                                                                  | 253865_at   | 0.5 |
| putative protein heat shock protein 101 - Triticum aestivum,PID:g4558484                                                                        | 253614_at   | 0.5 |
| small nuclear ribonucleoprotein homolog small nuclear ribonucleoprotein E - Homo sapiens,PIR2:A32127;supported by full-length cDNA: Ceres:382   | 253607_at   | 0.5 |
| putative protein                                                                                                                                | 253574_at   | 0.5 |
| kinase binding protein - like Skb1 protein homolog, Homo sapiens, PIR2:T03842                                                                   | 253558_at   | 0.5 |
| putative poly(A) polymerase polynucleotide adenylyltransferase (EC 2.7.7.19) class I - bovine, PIR2:S17875                                      | 253399_at   | 0.5 |
| putative protein predicted protein, Caenorhabditis elegans, gb:Z70780;supported by full-length cDNA: Ceres:8739.                                | 253385_at   | 0.5 |
| putative protein hypothetical protein slr2121, Synechocystis sp., PIR2:S75497;supported by full-length cDNA: Ceres:8686.                        | 253273_at   | 0.5 |
| putative protein ;supported by full-length cDNA: Ceres:8286.                                                                                    | 253072_at   | 0.5 |
| Expressed protein ; supported by full-length cDNA: Ceres: 39781.                                                                                | 252979_at   | 0.5 |
| cinnamyl-alcohol dehydrogenase ELI3-1 ; supported by cDNA: gi_13430625_gb_AF360225.1_AF360225                                                   | 252983_at   | 0.5 |
| putative protein other predicted proteins Arabidopsis thaliana;supported by full-length cDNA: Ceres:123929.; supported by cDNA: gi_15810308_gb_ | 252975_s_at | 0.5 |
| Phospholipase like protein Arabidopsis thaliana pEARLI 4 mRNA, PID:g871782                                                                      | 252976_s_at | 0.5 |
| putative protein                                                                                                                                | 252918_at   | 0.5 |
| hypothetical protein                                                                                                                            | 252612_at   | 0.5 |

|                                                                                                                                                              |           |     |
|--------------------------------------------------------------------------------------------------------------------------------------------------------------|-----------|-----|
| B12D-like protein B12D protein - Hordeum vulgare,PIR2:S60284                                                                                                 | 252348_at | 0.5 |
| hypothetical protein                                                                                                                                         | 252362_at | 0.5 |
| MTN3-like protein MtN3 gene product - Medicago truncatula,PID:e1169583; supported by cDNA: gi_13605687_gb_AF361825.1_AF361825                                | 252327_at | 0.5 |
| putative protein predicted protein, Arabidopsis thaliana                                                                                                     | 252250_at | 0.5 |
| cyclin D3-like protein Nicotiana tabacum NtcycD3-1 - Nicotiana tabacum, EMBL:AB015222;supported by full-length cDNA: Ceres:36056.                            | 252189_at | 0.5 |
| putative protein predicted protein, Arabidopsis thaliana                                                                                                     | 252204_at | 0.5 |
| zinc finger protein zinc finger protein ID1, Zea mays, EMBL:AF058757                                                                                         | 252175_at | 0.5 |
| U1 snRNP 70K protein ; supported by cDNA: gi_14532499_gb_AY039874.1_                                                                                         | 252182_at | 0.5 |
| putative disease resistance protein                                                                                                                          | 252126_at | 0.5 |
| putative protein ;supported by full-length cDNA: Ceres:118329.                                                                                               | 252036_at | 0.5 |
| hypothetical protein predicted protein, Arabidopsis thaliana                                                                                                 | 252000_at | 0.5 |
| splicing factor - like protein splicing factor, arginine/serine-rich 7, Homo sapiens, PIR:A57198                                                             | 251943_at | 0.5 |
| plasma membrane intrinsic protein 2a ;supported by full-length cDNA: Ceres:38965.                                                                            | 251962_at | 0.5 |
| RING finger - like protein DNA-binding Mel-18 protein, Homo sapiens, PIR:JN0717supported by full-length cDNA: Ceres:20931.                                   | 251897_at | 0.5 |
| pectate lyase - like protein pectate lyase, Musa acuminata, X92943                                                                                           | 251864_at | 0.5 |
| protein kinase C inhibitor-like protein protein kinase C inhibitor - Zea mays, PIR:S45368; supported by full-length cDNA: Ceres: 28847.                      | 251707_at | 0.5 |
| hypothetical protein                                                                                                                                         | 251650_at | 0.5 |
| hypothetical protein                                                                                                                                         | 251632_at | 0.5 |
| imbibition protein homolog probable imbibition protein - Brassica oleracea, PIR:S45033; supported by cDNA: gi_15292676_gb_AY050772.1_                        | 251642_at | 0.5 |
| putative protein ;supported by full-length cDNA: Ceres:29384., Ceres:101256.                                                                                 | 251558_at | 0.5 |
| putative DNA-binding protein DNA-binding protein (dbp) - Arabidopsis thaliana, EMBL:ATDNABP;supported by full-length cDNA: Ceres:40796.                      | 251306_at | 0.5 |
| putative protein paladin - Mus musculus, EMBL:MMPAL                                                                                                          | 251296_at | 0.5 |
| putative protein hypothetical protein - Synechocystis sp. (strain PCC 6803), PIR:S75899; supported by cDNA: gi_16648774_gb_AY058164.1_                       | 251243_at | 0.5 |
| putative protein glycosyl transferase IgtC - Neisseria gonorrhoeae, EMBL:AF208062                                                                            | 251225_at | 0.5 |
| small nuclear ribonucleoprotein-like protein small nuclear ribonucleoprotein chain D2 - Homo sapiens, PIR:I38861;supported by full-length cDNA: Ceres:39035. | 251184_at | 0.5 |
| putative protein ; supported by full-length cDNA: Ceres: 39035.                                                                                              | 250925_at | 0.5 |
| F1F0-ATPase inhibitor - like protein F1F0-ATPase inhibitor protein, OsIF1-1, Oryza sativa, EMBL:AB029059; supported by full-length cDNA: Ceres:              | 250863_at | 0.5 |
| harpin-induced protein-like                                                                                                                                  | 250724_at | 0.5 |
| putative protein similar to unknown protein (gb AAF32477.1);supported by full-length cDNA: Ceres:117588.                                                     | 250737_at | 0.5 |
| putative protein similar to unknown protein (ref NP_055701.1);supported by full-length cDNA: Ceres:15229.                                                    | 250703_at | 0.5 |
| putative protein similar to unknown protein (pir T27191);supported by full-length cDNA: Ceres:249722.                                                        | 250532_at | 0.5 |
| unknown protein ; supported by full-length cDNA: Ceres: 37422.                                                                                               | 250454_at | 0.5 |
| 14-3-3 protein GF14lambda (grf6/AFT1) identical to 14-3-3 GF14lambda GI:1345595 from [Arabidopsis thaliana]; supported by cDNA: gi_14335137_                 | 250439_at | 0.5 |
| membrane translocase - like protein inner mitochondrial membrane translocase Tim17b, Homo sapiens, EMBL:AF034790;supported by full-length c                  | 250333_at | 0.5 |
| NADH dehydrogenase (ubiquinone) ;supported by full-length cDNA: Ceres:13161.                                                                                 | 250334_at | 0.5 |
| ABA-responsive protein - like ABA-responsive protein, Hordeum vulgare, EMBL:AF026538                                                                         | 250279_at | 0.5 |
| putative protein contains similarity to N-acetyltransferase; supported by full-length cDNA: Ceres: 30545.                                                    | 250226_at | 0.5 |
| putative protein various predicted proteins, Arabidopsis thaliana                                                                                            | 250183_at | 0.5 |
| putative protein similar to unknown protein (gb AAF26981.1)                                                                                                  | 250119_at | 0.5 |
| putative protein; similar to unknown protein (gb AAF26969.1)                                                                                                 | 250076_at | 0.5 |
| putative protein COLD-INDUCIBLE RNA-BINDING PROTEIN, Homo sapiens, SWISSPROT:CIRP_HUMAN                                                                      | 249966_at | 0.5 |
| E1, ubiquitin-like activating enzyme ECR1 identical to gi:2952433; supported by cDNA: gi_15215793_gb_AY050426.1_                                             | 249926_at | 0.5 |

|                                                                                                                              |             |     |
|------------------------------------------------------------------------------------------------------------------------------|-------------|-----|
| photosystem II stability/assembly factor HCF136 (sp O82660) ; supported by cDNA: gi_15010779_gb_AY045691.1_                  | 249875_at   | 0.5 |
| squalene monooxygenase                                                                                                       | 249774_at   | 0.5 |
| putative protein contains similarity to ribosomal protein 30S subunit; supported by cDNA: gi_13877770_gb_AF370148.1_AF370148 | 249742_at   | 0.5 |
| peroxidase ATP26a                                                                                                            | 249392_at   | 0.5 |
| putative protein similar to unknown protein (emb CAB62355.1);supported by full-length cDNA: Ceres:94968.                     | 249330_at   | 0.5 |
| unknown protein                                                                                                              | 249313_at   | 0.5 |
| putative protein contains similarity to glutathione-S-transferase/glutaredoxin;supported by full-length cDNA: Ceres:4645.    | 249233_at   | 0.5 |
| putative protein similar to unknown protein (sp P37707);supported by full-length cDNA: Ceres:6903.                           | 249237_at   | 0.5 |
| beta-ketoacyl-CoA synthase ; supported by cDNA: gi_14334713_gb_AY035030.1_                                                   | 249123_at   | 0.5 |
| Expressed protein ; supported by full-length cDNA: Ceres: 121432.                                                            | 249026_at   | 0.5 |
| regulatory protein NPR1-like; transcription factor inhibitor I kappa B-like                                                  | 248981_at   | 0.5 |
| ras-related GTP-binding protein RHA1 (sp P31582) ;supported by full-length cDNA: Ceres:37862.                                | 248983_at   | 0.5 |
| DNA-directed RNA polymerase subunit                                                                                          | 248984_at   | 0.5 |
| calcium sensor protein, calcineurin-like ; supported by cDNA: gi_15866278_gb_AF411958.1_AF411958                             | 248827_at   | 0.5 |
| 60S acidic ribosomal protein P1-like protein ;supported by full-length cDNA: Ceres:14401.                                    | 248768_at   | 0.5 |
| NADH dehydrogenase 10.5K chain-like protein ; supported by full-length cDNA: Ceres: 39633.                                   | 248746_at   | 0.5 |
| Expressed protein ; supported by full-length cDNA: Ceres: 12974.                                                             | 248665_at   | 0.5 |
| putative protein contains similarity to unknown protein (dbj BAA90946.1)                                                     | 248601_at   | 0.5 |
| putative protein contains similarity to unknown protein (pir T05510)                                                         | 248499_at   | 0.5 |
| putative protein similar to unknown protein (pir T04431);supported by full-length cDNA: Ceres:26264.                         | 248329_at   | 0.5 |
| putative protein similar to unknown protein (pir T02893)                                                                     | 248302_at   | 0.5 |
| FtsH protease, putative similar to ATP-dependent metalloprotease FtsH1 GI:3600100 from [Mus musculus]                        | 248303_at   | 0.5 |
| unknown protein ; supported by full-length cDNA: Ceres: 106913.                                                              | 248219_at   | 0.5 |
| pyruvate decarboxylase (gb AAB16855.1)                                                                                       | 248138_at   | 0.5 |
| putative protein similar to unknown protein (pir T05472);supported by full-length cDNA: Ceres:30073.                         | 248148_at   | 0.5 |
| Expressed protein ; supported by full-length cDNA: Ceres: 39314.                                                             | 247899_at   | 0.5 |
| CONSTANS-like B-box zinc finger protein-like ;supported by full-length cDNA: Ceres:6639.                                     | 247921_at   | 0.5 |
| Expressed protein                                                                                                            | 247924_at   | 0.5 |
| beta 1-3 glucanase - like protein beta 1-3 glucanase, Vitis vinifera, EMBL:VVI277900                                         | 247826_at   | 0.5 |
| putative protein various predicted proteins, Arabidopsis thaliana                                                            | 247563_at   | 0.5 |
| RNA helicase ; supported by cDNA: gi_14517481_gb_AY039576.1_                                                                 | 247465_at   | 0.5 |
| putative protein contains similarity to nonspecific lipid-transfer protein;supported by full-length cDNA: Ceres:98459.       | 247268_at   | 0.5 |
| nuclear protein-like                                                                                                         | 247271_at   | 0.5 |
| putative protein strong similarity to unknown protein (emb CAB89363.1)                                                       | 247265_at   | 0.5 |
| putative protein contains similarity to auxin-independent growth promoter                                                    | 247186_at   | 0.5 |
| putative protein contains similarity to NADH dehydrogenase chain CI-18;supported by full-length cDNA: Ceres:28455.           | 247011_at   | 0.5 |
| putative protein hypothetical proteins - different species                                                                   | 246768_at   | 0.5 |
| ribosomal protein S21 - like ribosomal protein S21, Zea mays, PIR:T03945;supported by full-length cDNA: Ceres:93174.         | 246747_at   | 0.5 |
| bcnt-like protein ; supported by full-length cDNA: Ceres: 9811.                                                              | 246674_at   | 0.5 |
| cold and ABA inducible protein kin1 ;supported by full-length cDNA: Ceres:2270.                                              | 246481_s_at | 0.5 |
| hypothetical protein ; supported by full-length cDNA: Ceres: 8960.                                                           | 246291_at   | 0.5 |
| sugar transporter like protein                                                                                               | 246238_at   | 0.5 |

|                                                                                                                                  |             |     |
|----------------------------------------------------------------------------------------------------------------------------------|-------------|-----|
| hypothetical protein ;supported by full-length cDNA: Ceres:108940.                                                               | 246196_at   | 0.5 |
| putative protein predicted proteins from various species; supported by full-length cDNA: Ceres: 17786.                           | 246156_at   | 0.5 |
| ribosomal protein L7Ae-like NHP2/RS6 FAMILY PROTEIN YEL026W HOMOLOG - Homo sapiens, EMBL:D50420;supported by full-length cDNA: C | 246070_at   | 0.5 |
| hypothetical protein ; supported by full-length cDNA: Ceres: 38847.                                                              | 246074_at   | 0.5 |
| putative protein farnesyl cysteine carboxyl methyltransferase, Rattus norvegicus, EMBL:AF075595                                  | 246053_at   | 0.5 |
| polyubiquitin (UBQ4) identical to GI:17677                                                                                       | 245989_s_at | 0.5 |
| putative protein predicted protein, Arabidopsis thaliana;supported by full-length cDNA: Ceres:29453.                             | 245999_at   | 0.5 |
| germin-like protein ; supported by cDNA: gi_14517363_gb_AY039516.1_                                                              | 246004_at   | 0.5 |
| hypothetical protein predicted by genemark.hmm;supported by full-length cDNA: Ceres:7343.                                        | 245761_at   | 0.5 |
| hypothetical protein predicted by genemark.hmm;supported by full-length cDNA: Ceres:20991.                                       | 245666_at   | 0.5 |
| RNA polymerase II fifth largest subunit like protein                                                                             | 245569_at   | 0.5 |
| hypothetical protein ;supported by full-length cDNA: Ceres:38042.                                                                | 245330_at   | 0.5 |
| unknown protein ; supported by cDNA: gi_16930450_gb_AF419579.1_AF419579                                                          | 245119_at   | 0.5 |
| PSII cytochrome b559                                                                                                             | 244963_at   | 0.5 |
| ribosomal protein L33                                                                                                            | 244968_at   | 0.5 |
| cytochrome B6                                                                                                                    | 244976_at   | 0.5 |



**Table 3: Transcripts elevated in cells during drought stress compared to unstressed plants**

|                                                                                                                                                           | Affymetrix number | log <sub>2</sub> fold increase |
|-----------------------------------------------------------------------------------------------------------------------------------------------------------|-------------------|--------------------------------|
| late embryogenesis abundant protein LEA like ; supported by cDNA: gi_15293004_gb_AY050936.1_                                                              | 250648_at         | 8.6                            |
| senescence-associated protein (SAG29) ; supported by full-length cDNA: Ceres:38843.                                                                       | 245982_at         | 7.8                            |
| unknown protein similar to pollen coat protein GB:CAA63531 from [Brassica oleracea]; supported by cDNA: gi_14335127_gb_AY037243.1_                        | 258498_at         | 7.5                            |
| late embryogenesis-abundant protein, putative similar to late embryogenesis-abundant protein GI:17828 from [Brassica napus]; supported by full-length     | 262128_at         | 5.9                            |
| putative sucrose synthetase similar to several plant sugar synthetases similar to P. sativum second sugar synthetase, GenBank accession number /          | 255521_at         | 5.9                            |
| nonspecific lipid-transfer protein precursor - like nonspecific lipid-transfer protein precursor, Brassica napus, EMBL:AF101038; supported by full-length | 247718_at         | 5.9                            |
| Myb-related transcription factor, putative similar to GB:AAF66727 from [Petunia x hybrida] (Plant Cell 11 (8), 1433-1444 (1999)); supported by cDNA       | 260140_at         | 5.8                            |
| hypothetical protein similar to Anthocyanin 5-aromatic acyltransferase GB:BAA74428                                                                        | 265091_s_at       | 5.6                            |
| nonspecific lipid-transfer protein precursor - like nonspecific lipid-transfer protein precursor, Brassica napus, EMBL:AF101038; supported by full-length | 247717_at         | 5.6                            |
| homeodomain transcription factor (ATHB-7) identical to SP:P46897; supported by cDNA: gi_15027938_gb_AY045826.1_                                           | 266327_at         | 5.3                            |
| putative metal-binding protein highly similar to GB:AAD09511; supported by cDNA: gi_15450582_gb_AY052659.1_                                               | 264729_at         | 5.3                            |
| putative protein predicted protein                                                                                                                        | 254823_at         | 5.3                            |
| 1,4-alpha-glucan branching enzyme protein soform SBE2.2 precursor                                                                                         | 250906_at         | 5.3                            |
| putative protein helix-loop-helix protein DEL -Antirrhinum majus.PIR2:A42220                                                                              | 255056_at         | 5.2                            |
| dihydroflavonol 4-reductase                                                                                                                               | 249215_at         | 5.2                            |
| dehydrin RAB18-like protein (sp P30185) ; supported by cDNA: gi_16226664_gb_AF428458.1_AF428458                                                           | 247095_at         | 5.2                            |
| unknown protein similar to At14a protein GB:AAD26355 GI:4589123 [Arabidopsis thaliana]; supported by cDNA: gi_16226582_gb_AF428437.1_AF4                  | 256603_at         | 5                              |
| putative protein putative protein - Arabidopsis thaliana, EMBL:AL078465.1; supported by full-length cDNA: Ceres:121300.                                   | 252319_at         | 5                              |
| putative protein similar to unknown protein (emb)CAB62340.1; supported by full-length cDNA: Ceres:103870.                                                 | 248505_at         | 5                              |
| hypothetical protein contains Pfam profile: PF01535 domain of unknown function (contains 3 copies)                                                        | 260062_at         | 5                              |
| unknown protein ; supported by cDNA: gi_15028356_gb_AY045981.1_                                                                                           | 266462_at         | 4.9                            |
| hypothetical protein predicted by genscan; supported by cDNA: gi_15451109_gb_AY054635.1_                                                                  | 266098_at         | 4.9                            |
| putative AVR9 elicitor response protein similar to GB:AA069935; supported by cDNA: gi_14488077_gb_AF389287.1_AF389287                                     | 264583_at         | 4.9                            |
| putative phytochrome-associated protein 3 similar to GB:AA099771; supported by cDNA: gi_3929585_gb_AF100166.1_AF100166                                    | 264510_at         | 4.9                            |
| En/Spm-like transposon protein, putative similar to En/Spm-like transposon protein GI:2739374 from [Arabidopsis thaliana]                                 | 262448_at         | 4.9                            |
| hypothetical protein predicted by genefinder                                                                                                              | 260540_at         | 4.9                            |
| putative protein predicted protein, Arabidopsis thaliana                                                                                                  | 253344_at         | 4.9                            |
| flavanone 3-hydroxylase (FH3) ; supported by full-length cDNA: Ceres:36653.                                                                               | 252123_at         | 4.9                            |
| hypothetical protein                                                                                                                                      | 251637_at         | 4.9                            |
| mannan endo-1,4-beta-mannosidase                                                                                                                          | 247097_at         | 4.9                            |
| putative NPK1-related MAP kinase similar to GB:BAA21855 from [Arabidopsis thaliana]                                                                       | 265216_at         | 4.8                            |
| putative ADP-glucose pyrophosphorylase large subunit                                                                                                      | 263544_at         | 4.8                            |
| putative protein strictosidine synthase (EC 4.3.3.2) - Rauvolfia mannii (fragment); supported by cDNA: gi_13877836_gb_AF370181.1_AF370181                 | 251668_at         | 4.8                            |
| Arm repeat containing protein - like arm repeat containing protein homolog, Arabidopsis thaliana, EMBL:AL133314                                           | 251407_at         | 4.8                            |
| MAP kinase kinase 3 (ATMKK3) 10.01.01.11; supported by cDNA: gi_3219268_dbj_AB015314.1_AB015314                                                           | 249351_at         | 4.8                            |
| unknown protein ; supported by cDNA: gi_14532707_gb_AY039978.1_                                                                                           | 267080_at         | 4.7                            |
| putative indole-3-acetate beta-glucosyltransferase similar to indole-3-acetate beta-glucosyltransferase GB:AAD32293                                       | 263230_at         | 4.7                            |
| glucosyltransferase like protein                                                                                                                          | 245624_at         | 4.7                            |
| putative Ras-like GTP-binding protein contains Pfam profile: PF00071 Ras family                                                                           | 258652_at         | 4.6                            |
| heat shock protein 70 identical to heat shock protein 70 GB:CAA05547 GI:3962377 [Arabidopsis thaliana]; supported by cDNA: gi_15809831_gb_AY              | 256245_at         | 4.6                            |
| gibberellin-regulated protein GAS3 precursor ; supported by cDNA: gi_15450402_gb_AY052302.1_                                                              | 255048_at         | 4.6                            |
| anthocyanidin synthase - like protein putative leucoanthocyanidin dioxygenase, Arabidopsis thaliana, PID:g1575699                                         | 254283_s_at       | 4.6                            |
| low-temperature-induced protein 78 (sp)Q06738) ; supported by cDNA: gi_348691_gb_L22567.1_ATHCOR78A                                                       | 248337_at         | 4.6                            |
| hypothetical protein similar to hypothetical protein GI:4539438 from [Arabidopsis thaliana]                                                               | 261233_at         | 4.6                            |
| SRG1-like protein Strong homology to SRG1 protein, a new member of the Fe(II)/ascorbate oxidase superfamily, Similar to SRG1 protein [Arabidop:           | 262482_at         | 4.5                            |
| putative protein contains similarity to chalcone-flavonone isomerase (chalcone isomerase)supported by full-length cDNA: Ceres:40439.                      | 250794_at         | 4.5                            |
| unknown protein similar to hypothetical protein GB:AAF24564 GI:6692099 from [Arabidopsis thaliana]; supported by cDNA: gi_15810166_gb_AY056               | 262347_at         | 4.4                            |
| putative protein hypothetical protein At2g37870 - Arabidopsis thaliana, EMBL:AC007661; supported by full-length cDNA: Ceres:5920.                         | 251928_at         | 4.4                            |
| flavonol 3-O-glucosyltransferase-like                                                                                                                     | 248185_at         | 4.4                            |
| DNA gyrase subunit B - like protein                                                                                                                       | 245719_at         | 4.4                            |
| hypothetical protein predicted by genemark.hmm                                                                                                            | 256999_at         | 4.3                            |
| Anthocyanin 5-aromatic acyltransferase, putative similar to Anthocyanin 5-aromatic acyltransferase GB:BAA74428 from [Gentiana triflora]                   | 256924_at         | 4.3                            |
| delta-1-pyrroline-5-carboxylate synthetase                                                                                                                | 251775_s_at       | 4.3                            |
| DNA excision repair cross-complementing protein; similar to human Xeroderma pigmentosum group B DNA repair protein (gb)AAC4987.1) ; suppo                 | 249307_s_at       | 4.3                            |
| bHLH transcription factor                                                                                                                                 | 248867_at         | 4.3                            |
| unknown protein ; supported by cDNA: gi_15451043_gb_AY054602.1_                                                                                           | 248223_at         | 4.3                            |
| unknown protein                                                                                                                                           | 262940_at         | 4.2                            |
| hypothetical protein predicted by genscan                                                                                                                 | 263871_at         | 4.2                            |
| lipoamide dehydrogenase, putative                                                                                                                         | 262650_at         | 4.2                            |
| putative transcriptional regulator similar to homeotic gene regulator (brahma protein); contains Pfam profile PF00176 SNF2 and others N-terminal do       | 258559_at         | 4.2                            |
| unknown protein identical to LEA-like protein GB:CAA10352 from [Arabidopsis thaliana]                                                                     | 258347_at         | 4.2                            |
| putative protein similar to unknown protein (gb)AAC73025.1); supported by cDNA: gi_14532515_gb_AY039882.1_                                                | 250825_at         | 4.2                            |
| low-temperature-induced 65 kD protein (sp)Q04980)                                                                                                         | 248352_at         | 4.2                            |
| RuBisCO subunit binding-protein beta subunit precursor; chaperonin, 60 kDa                                                                                | 248021_at         | 4.2                            |
| receptor-like protein kinase                                                                                                                              | 247197_at         | 4.2                            |
| putative protein CDPK substrate protein 1, Mesembryanthemum crystallinum, EMBL:AF219972; supported by full-length cDNA: Ceres:13378.                      | 246724_at         | 4.2                            |
| hypothetical protein predicted by genscan; supported by cDNA: gi_15010703_gb_AY045653.1_                                                                  | 267341_at         | 4.1                            |
| putative glucosyltransferase                                                                                                                              | 265499_at         | 4.1                            |
| protein phosphatase 2C, putative similar to GB:CAB90633 from [Fagus sylvatica]; supported by full-length cDNA: Ceres:118185.                              | 261077_at         | 4.1                            |
| B regulatory subunit of protein phosphatase 2A, putative similar to B regulatory subunit of protein phosphatase 2A GI:2160694 from (Arabidopsis th        | 259359_at         | 4.1                            |
| hypothetical protein                                                                                                                                      | 253145_at         | 4.1                            |
| putative protein various predicted proteins, Arabidopsis thaliana                                                                                         | 250955_at         | 4.1                            |
| putative protein intracellular protein Mg11, mouse, PIR:I49127; supported by cDNA: gi_14488068_gb_AF389282.1_AF389282                                     | 249403_at         | 4.1                            |
| hypothetical protein predicted by genefinder                                                                                                              | 257436_s_at       | 4.1                            |
| oxidase, putative similar to oxidase GB:AAA32870 GI:166876 from (Arabidopsis thaliana); supported by full-length cDNA: Ceres:152458.                      | 260706_at         | 4                              |
| phytochrome E                                                                                                                                             | 254680_at         | 4                              |
| glucose-1-phosphate adenyltransferase (APL3) ; supported by cDNA: gi_16648984_gb_AY059862.1_                                                              | 252888_at         | 4                              |
| glutathione S-transferase-like protein ; supported by cDNA: gi_11096011_gb_AF288189.1_AF288189                                                            | 250083_at         | 4                              |
| protein phosphatase 2C - like ABA induced protein phosphatase 2C, Fagus sylvatica, EMBL:FSY277743; supported by cDNA: gi_15809791_gb_AY                   | 247723_at         | 4                              |
| unknown protein ; supported by cDNA: gi_13265448_gb_AF324676.2_AF324676                                                                                   | 263881_at         | 3.9                            |
| unknown protein ; supported by cDNA: gi_15983443_gb_AF424596.1_AF424596                                                                                   | 258624_at         | 3.9                            |
| unknown protein ; supported by cDNA: gi_13358195_gb_AF325003.2_AF325003                                                                                   | 256114_at         | 3.9                            |
| dehydrin Xero2 ; supported by cDNA: gi_15809983_gb_AY054260.1_                                                                                            | 252102_at         | 3.9                            |
| Expressed protein ; supported by cDNA: gi_14517386_gb_AY039528.1_                                                                                         | 245283_at         | 3.9                            |

|                                                                                                                                                        |             |     |
|--------------------------------------------------------------------------------------------------------------------------------------------------------|-------------|-----|
| nodulin-like protein                                                                                                                                   | 267044_at   | 3.8 |
| unknown protein ;supported by full-length cDNA: Ceres:100283.                                                                                          | 265907_at   | 3.8 |
| putative RNA helicase A 3 end of this gene is located at the beginning of F10A8, GB:AAD14515                                                           | 265731_at   | 3.8 |
| glucose-6-phosphate/phosphate-translocator precursor, putative similar to glucose-6-phosphate/phosphate-translocator precursor GI:2997591 from         | 264400_at   | 3.8 |
| methionine/cystathionine gamma lyase, putative similar to methionine gamma-lyase GB:CAA04124.1 GI:2330885 from [Trichomonas vaginalis]; sup            | 261957_at   | 3.8 |
| branched-chain alpha keto-acid dehydrogenase, putative similar to branched-chain alpha keto-acid dehydrogenase GB:AAC69851 GI:3822223 from:260900_s_at | 260900_s_at | 3.8 |
| putative RNA-binding protein contains Pfam profile: PF00076 RNA recognition motif. (a.k.a. RRM, RBD, or RNP domain); similar to ras-GTPase-acti        | 257817_at   | 3.8 |
| unknown protein contains Pfam profile: PF00430 ATP synthase B/B CF(0); supported by cDNA: gi_15810372_gb_AY056225.1_                                   | 257732_at   | 3.8 |
| putative protein predicted protein, Arabidopsis thaliana                                                                                               | 254289_at   | 3.8 |
| putative major latex protein major latex protein type 1 - Arabidopsis thaliana, EMBL:X91960; supported by cDNA: gi_13605713_gb_AF361838.1_AF           | 254234_at   | 3.8 |
| putative protein cellulose synthase catalytic subunit (Ath-A), Arabidopsis thaliana; gb:AF027173                                                       | 254186_at   | 3.8 |
| putative protein predicted proteins, Arabidopsis thaliana and Oryza sativa                                                                             | 249952_at   | 3.8 |
| phospholipase D ; supported by cDNA: gi_15284210_gb_U84568.2_ATU84568                                                                                  | 267536_at   | 3.7 |
| putative glutathione S-transferase ; supported by cDNA: gi_11096003_gb_AF288185.1_AF288185                                                             | 266270_at   | 3.7 |
| flavin-containing monooxygenase, putative similar to flavin-containing monooxygenase GB:AAA21178 GI:349534 from [Oryctolagus cuniculus]; sup           | 265119_at   | 3.7 |
| mutM homologue-1 identical to mutM homologue-1 GI:3550982 from [Arabidopsis thaliana]; supported by cDNA: gi_3820619_gb_AF099970.1_AF09                | 262129_at   | 3.7 |
| unknown protein                                                                                                                                        | 259322_at   | 3.7 |
| putative N2,N2-dimethylguanosine tRNA methyltransferase similar to N2,N2-dimethylguanosine tRNA methyltransferase GB:CAA20101 GI:6901242               | 259075_at   | 3.7 |
| signal recognition particle receptor beta subunit-like protein                                                                                         | 250768_at   | 3.7 |
| F5A9.19 unknown protein; similar to ESTs dbj AV529799.1, dbjAV524005.1                                                                                 | 245645_at   | 3.7 |
| drought-induced protein like                                                                                                                           | 245523_at   | 3.7 |
| hypothetical protein predicted by genscan+                                                                                                             | 267397_at   | 3.6 |
| hypothetical protein similar to membrane associated salt inducible protein isolog; similar to F21B7.18 and F21B7.21                                    | 264816_at   | 3.6 |
| putative 3-methylcrotonyl-CoA carboxylase ESTs gb H35836, gb AA651295 and gb AA721862 come from this gene; supported by cDNA: gi_53370f                | 263118_at   | 3.6 |
| cinnamoyl CoA reductase, putative similar to cinnamoyl CoA reductase GB:AAF43141 GI:7239228 from [Populus tremuloides]; supported by full-len          | 261899_at   | 3.6 |
| hypothetical protein predicted by genemark.hmm                                                                                                         | 259463_at   | 3.6 |
| unknown protein ; supported by cDNA: gi_13605890_gb_AF367344.1_AF367344                                                                                | 250784_at   | 3.6 |
| heat shock transcription factor                                                                                                                        | 248936_at   | 3.6 |
| receptor-like protein kinase precursor - like receptor-like protein kinase precursor, Madagascar periwinkle, PIR:T10060                                | 247686_at   | 3.6 |
| pectinacetyltransferase precursor, putative similar to pectinacetyltransferase precursor GI:1431629 from [Vigna radiata]                               | 246403_at   | 3.6 |
| putative TPR repeat nuclear phosphoprotein TPR repeat protein                                                                                          | 265522_at   | 3.5 |
| hypothetical protein similar to Human XE169 protein (gi 3033385); similar to EST gb T88128                                                             | 264528_at   | 3.5 |
| unknown protein ;supported by full-length cDNA: Ceres:25894.                                                                                           | 264094_at   | 3.5 |
| aldehyde dehydrogenase homolog, putative similar to aldehyde dehydrogenase homolog GI:913941 from [Brassica napus]; supported by cDNA: gi_             | 263157_at   | 3.5 |
| Myb-related transcription factor mixta, putative similar to Myb-related transcription factor mixta GI:485866 from [Antirrhinum majus]                  | 261431_at   | 3.5 |
| hypothetical protein                                                                                                                                   | 259568_at   | 3.5 |
| unknown protein similar to hypothetical 77.0 KD protein in HES1-SEC63 intergenic region GB:Q08647 [Saccharomyces cerevisiae]                           | 259082_at   | 3.5 |
| unknown protein ; supported by cDNA: gi_16930484_gb_AF419596.1_AF419596                                                                                | 256323_at   | 3.5 |
| TMV resistance protein N-like TMV resistance protein N, Nicotiana glutinosa, PIR2:A54810                                                               | 254586_at   | 3.5 |
| hypothetical protein ; supported by cDNA: gi_14334435_gb_AY034909.1_                                                                                   | 251262_at   | 3.5 |
| flavonoid 3-hydroxylase - like protein flavonoid 3 -hydroxylase Ht1, Petunia x hybrida, EMBL:AF155332; supported by cDNA: gi_10334803_gb_AF2           | 250558_at   | 3.5 |
| hypothetical protein contains similarity to DNA polymerase III, epsilon subunit GI:8163241 from [Chlamydia muridarum]                                  | 245743_at   | 3.5 |
| anthocyanin2, putative similar to anthocyanin2 (An2) GI:7673088 from [Petunia integrifolia]; supported by cDNA: gi_3941507_gb_AF062908.1_AF06          | 245628_at   | 3.5 |
| hypothetical protein predicted by genscan                                                                                                              | 264065_at   | 3.4 |
| putative SecA-type chloroplast protein transport factor Similar to gb X82404 chloroplast SecA protein from Pisum sativum                               | 262491_at   | 3.4 |
| sec14 cytosolic factor, putative similar to SP:P24859 from [Kluyveromyces lactis]; supported by cDNA: gi_15810424_gb_AY056251.1_                       | 261151_at   | 3.4 |
| hypothetical protein predicted by genemark.hmm                                                                                                         | 260823_at   | 3.4 |
| unknown protein ;supported by full-length cDNA: Ceres:96702.                                                                                           | 260357_at   | 3.4 |
| hypothetical protein                                                                                                                                   | 257759_at   | 3.4 |
| serine/threonine-specific kinase lecRK1 precursor,lectin receptor-like                                                                                 | 251479_at   | 3.4 |
| putative protein strong similarity to unknown protein (gb AAC98056.1)                                                                                  | 250237_at   | 3.4 |
| chalcone synthase (naringenin-chalcone synthase) (testa 4 protein) (sp P13114) ; supported by full-length cDNA: Ceres:38370.                           | 250207_at   | 3.4 |
| serine/threonine protein kinase-like protein several serine/threonine protein kinases - different species; supported by cDNA: gi_15215663_gb_AY050     | 246922_at   | 3.4 |
| protein kinase, putative similar to SERINE/THREONINE-PROTEIN KINASE CTR1 GB:Q05609 from [Arabidopsis thaliana]                                         | 258509_at   | 3.3 |
| Expressed protein ; supported by cDNA: gi_14532529_gb_AY039889.1_                                                                                      | 266550_s_at | 3.3 |
| putative aldehyde dehydrogenase ; supported by cDNA: gi_14334931_gb_AY035139.1_                                                                        | 265188_at   | 3.3 |
| unknown protein ; supported by cDNA: gi_16604686_gb_AY059788.1_                                                                                        | 260361_at   | 3.3 |
| putative 3-phosphoinositide-dependent protein kinase-1 similar to 3-phosphoinositide-dependent protein kinase-1 GB:AAD37165 [Arabidopsis thaliana]     | 258964_at   | 3.3 |
| At14a-1 protein identical to At14a protein GB:AAD26355 GI:4589123 [Arabidopsis thaliana] [Gene 230 (1), 33-40 (1999)]                                  | 256601_s_at | 3.3 |
| hypothetical protein predicted by genemark.hmm                                                                                                         | 255929_at   | 3.3 |
| hypothetical protein                                                                                                                                   | 255687_at   | 3.3 |
| RNA helicase - like protein Cdc28p, Schizosaccharomyces pombe, PID:G1439562                                                                            | 254675_at   | 3.3 |
| NAM / CUC2 -like protein nap gene, Arabidopsis thaliana, PID:g2780192; supported by cDNA: gi_15912330_gb_AY056443.1_                                   | 253132_at   | 3.3 |
| putative protein strong similarity to unknown protein (gb AAF31728.1); supported by cDNA: gi_15292740_gb_AY050804.1_                                   | 249917_at   | 3.3 |
| unknown protein ; supported by cDNA: gi_14030678_gb_AF375430.1_AF375430                                                                                | 248969_at   | 3.3 |
| serine/threonine kinase, putative similar to serine/threonine kinase GI:2632252 from [Sorghum bicolor]; supported by cDNA: gi_14486385_gb_AY03         | 245775_at   | 3.3 |
| water stress-induced protein, putative similar to water stress-induced protein GI:454879 from [Oryza sativa]; supported by cDNA: gi_15215761_gb_       | 245627_at   | 3.3 |
| putative protein various hypothetical proteins from Arabidopsis thaliana                                                                               | 254917_at   | 3.3 |
| beta-VPE nearly identical to beta-VPE GB:BAA09615 GI:1805364 [Arabidopsis thaliana]; supported by cDNA: gi_14194096_gb_AF367254.1_AF367                | 262644_at   | 3.2 |
| putative endochitinase                                                                                                                                 | 260561_at   | 3.2 |
| putative calcium-binding EF-hand protein ; supported by cDNA: gi_10862967_dbj_AB039924.1_AB039924                                                      | 255795_at   | 3.2 |
| homeobox-leucine zipper protein ATHB-12 ;supported by full-length cDNA: Ceres:32615.                                                                   | 251272_at   | 3.2 |
| putative protein similar to unknown protein (gb AAF23188.1)                                                                                            | 250728_at   | 3.2 |
| ABC transporter -like protein TAP-like ABC transporter, Rattus norvegicus, EMBL:AB027520                                                               | 249487_at   | 3.2 |
| heat shock transcription factor-like protein                                                                                                           | 249117_at   | 3.2 |
| putative serine carboxypeptidase 1 ;supported by full-length cDNA: Ceres:33165.                                                                        | 267256_s_at | 3.1 |
| unknown protein ; supported by cDNA: gi_15810470_gb_AY056274.1_                                                                                        | 265484_at   | 3.1 |
| phenylalanine ammonia lyase (PAL1) ; supported by cDNA: gi_15028192_gb_AY045919.1_                                                                     | 263845_at   | 3.1 |
| hypothetical protein similar to hypothetical proteins: GB:AAD21751, GB:AAC33230 [Arabidopsis thaliana]                                                 | 260262_at   | 3.1 |
| seven in absentia-like protein similar to SINA1p GB:CAB40577 from [Vitis vinifera]; supported by cDNA: gi_16323493_gb_AY059135.1_                      | 256789_at   | 3.1 |
| putative protein predicted proteins, Arabidopsis thaliana                                                                                              | 252782_at   | 3.1 |
| putative protein various predicted proteins, Arabidopsis thaliana;supported by full-length cDNA: Ceres:6263.                                           | 251206_at   | 3.1 |
| alcohol dehydrogenase identical to alcohol dehydrogenase GI:469467 from (Arabidopsis thaliana); supported by full-length cDNA: Ceres: 4033.            | 264953_at   | 3   |
| hypothetical protein predicted by genscan                                                                                                              | 264831_at   | 3   |
| hypothetical protein predicted by genemark.hmm                                                                                                         | 264217_at   | 3   |
| putative acyl-CoA synthetase ; supported by cDNA: gi_15450592_gb_AY052664.1_                                                                           | 263811_at   | 3   |
| putative aminotransferase similar to beta-alanine-pyruvate aminotransferase GB:BAA19549 [Rattus norvegicus]. alanine-glyoxylate aminotransferas        | 258983_at   | 3   |

|                                                                                                                                                       |             |     |
|-------------------------------------------------------------------------------------------------------------------------------------------------------|-------------|-----|
| RNA-binding protein, putative contains Pfam profile: PF00806 Pumilio-family RNA binding domains (aka PUM-HD, Pumilio homology domain) (8 co           | 257122_at   | 3   |
| hypothetical protein predicted by genscan+                                                                                                            | 256379_at   | 3   |
| unknown protein contains Pfam profile: PF00917 MATH domain; supported by cDNA: gi_12083245_gb_AF332419.1_AF332419                                     | 256021_at   | 3   |
| major intrinsic protein (MIP) - like nodulin-26, Glycine max., PIR2:JQ2285; supported by full-length cDNA: Ceres: 36655.                              | 254971_at   | 3   |
| CTP synthase like protein CTP synthase, Methanococcus jannaschii,PIR2:E64446                                                                          | 254490_at   | 3   |
| phenylalanine ammonia-lyase ;supported by full-length cDNA: Ceres:110886.                                                                             | 251984_at   | 3   |
| putative protein hypothetical proteins - different species                                                                                            | 249656_at   | 3   |
| hypothetical protein predicted by genemark.hmm                                                                                                        | 264562_at   | 2.9 |
| lysine-ketoglutarate reductase/saccharopine ; supported by cDNA: gi_2052507                                                                           | 253373_at   | 2.9 |
| putative protein contains similarity to nucleolar protein                                                                                             | 247130_at   | 2.9 |
| PSII T protein                                                                                                                                        | 244973_at   | 2.9 |
| putative serine/threonine protein kinase ;supported by full-length cDNA: Ceres:18783.                                                                 | 267599_at   | 2.8 |
| putative putative sister-chromatide cohesion protein member of stromalin protein family;supported by full-length cDNA: Ceres:11935.                   | 266484_at   | 2.8 |
| hypothetical protein predicted by genscan                                                                                                             | 266028_at   | 2.8 |
| histone H1 ;supported by full-length cDNA: Ceres:112970.                                                                                              | 265817_at   | 2.8 |
| putative O-GlcNAc transferase similar to Rattus O-GlcNAc transferase (gb U76557)                                                                      | 264568_at   | 2.8 |
| hypothetical protein predicted by genemark.hmm; supported by cDNA: gi_11908125_gb_AF326910.1_AF326910                                                 | 264102_at   | 2.8 |
| 3-hydroxyisobutyryl-coenzyme A hydrolase, putative similar to 3-hydroxyisobutyryl-coenzyme A hydrolase GB:AAC52114 GI:3320120 [Homo sapien            | 262619_at   | 2.8 |
| unknown protein ; supported by cDNA: gi_16648825_gb_AY058190.1_                                                                                       | 262232_at   | 2.8 |
| polygalacturonase -like protein polygalacturonase, muskmelon, PIR:T08213; supported by cDNA: gi_15215708_gb_AY050383.1_                               | 252781_at   | 2.8 |
| protein kinase - like protein Pto kinase interactor 1 (Pti1), Lycopersicon esculentum, EMBL:SL28007.supported by full-length cDNA: Ceres:105458.      | 249588_at   | 2.8 |
| putative protein contains similarity to phytoacyl-early nodulin-like protein                                                                          | 248236_at   | 2.8 |
| unknown protein contains similarity to phytochrome interacting factor 3 GI:3929586 from [Arabidopsis thaliana]; supported by cDNA: gi_14334499_gb     | 245748_at   | 2.8 |
| hypothetical protein                                                                                                                                  | 258672_at   | 2.8 |
| putative protein crp1 protein - Zea mays, PIR:T01685                                                                                                  | 249436_at   | 2.8 |
| unknown protein EST gb ATTS0295 comes from this gene.supported by full-length cDNA: Ceres:20380.                                                      | 264580_at   | 2.7 |
| hypothetical protein similar to unknown protein GI:4585976 from [Arabidopsis thaliana];supported by full-length cDNA: Ceres:94828.                    | 262942_at   | 2.7 |
| unknown protein                                                                                                                                       | 260420_at   | 2.7 |
| putative protein kinase C-terminal region similar to MAP3K delta-1 protein kinase GB:CAA74591 [Arabidopsis thaliana]; contains Pfam profile: PF00C    | 259957_at   | 2.7 |
| unknown protein ; supported by cDNA: gi_16974549_gb_AY060562.1_                                                                                       | 259756_at   | 2.7 |
| unknown protein ; supported by cDNA: gi_13937210_gb_AF372960.1_AF372960                                                                               | 258400_at   | 2.7 |
| cytochrome P450, putative contains Pfam profile: PF00067 cytochrome P450                                                                              | 257628_at   | 2.7 |
| putative protein ;supported by full-length cDNA: Ceres:114734.                                                                                        | 256676_at   | 2.7 |
| putative protein hypothetical protein, Arabidopsis, PID:E353139; supported by cDNA: gi_13430803_gb_AF360314.1_AF360314                                | 253089_at   | 2.7 |
| phytochrome C (sp P14714)                                                                                                                             | 249666_at   | 2.7 |
| putative protein predicted proteins, Arabidopsis thaliana; supported by cDNA: gi_15810554_gb_AY056316.1_                                              | 249614_at   | 2.7 |
| kinesin -like protein Krm protein, L.japonicus, EMBL:LJGLN1                                                                                           | 249629_at   | 2.7 |
| plasma membrane ATPase 3 (proton pump) (sp P20431) ; supported by cDNA: gi_15982712_gb_AY056780.1_                                                    | 247902_at   | 2.7 |
| putative protein MtN19, Medicago truncatula, EMBL:MTY15367                                                                                            | 247488_at   | 2.7 |
| putative protein similarity to predicted proteins, Arabidopsis thaliana                                                                               | 245179_at   | 2.7 |
| unknown protein                                                                                                                                       | 245076_at   | 2.7 |
| putative glucosyltransferase ;supported by full-length cDNA: Ceres:153418.                                                                            | 266532_at   | 2.6 |
| unknown protein ; supported by cDNA: gi_13877764_gb_AF370145.1_AF370145                                                                               | 264989_at   | 2.6 |
| unknown protein                                                                                                                                       | 263513_at   | 2.6 |
| hypothetical protein contains similarity to ABC transporter GI:6626257 from [Methanobacterium thermoautotrophicum]                                    | 261969_at   | 2.6 |
| unknown protein similar to SPL1-related proteins: GB:CAB56771, GB:CAB56770, GB:CAB56773 [Arabidopsis thaliana]                                        | 259971_at   | 2.6 |
| protein phosphatase 2C (ATP2C-HA) identical to protein phosphatase 2C (ATP2C-HA) GB:AJ003119 [Arabidopsis thaliana] (Plant Mol. Biol. 38 (5), 8       | 259922_at   | 2.6 |
| early light-induced protein identical to early light-induced protein GB:AAB88391 from [Arabidopsis thaliana];supported by full-length cDNA: Ceres:144 | 258321_at   | 2.6 |
| HSC70-interacting protein, putative similar to HSC70-INTERACTING PROTEIN GB:P50502 from [Homo sapiens]                                                | 258187_at   | 2.6 |
| putative cinnamoyl-CoA reductase highly similar to F4P9.37;supported by full-length cDNA: Ceres:11254.                                                | 255787_at   | 2.6 |
| putative protein membrane-associated salt-inducible protein, Nicotiana tabacum; supported by cDNA: gi_15810160_gb_AY056145.1_                         | 254581_at   | 2.6 |
| fatty acid elongase - like protein KCS1 fatty acid elongase 3-ketoacyl-CoA synthase 1, Arabidopsis thaliana, EMBL:AF053345                            | 250891_at   | 2.6 |
| 3-keto-acyl-CoA thiolase 2 (gb AAC17877.1) ; supported by cDNA: gi_3192892_gb_AF062590.1_AF062590                                                     | 248625_at   | 2.6 |
| putative protein KIAA0066, Homo sapiens, EMBL:HSORFKG10                                                                                               | 247828_at   | 2.6 |
| peptidylprolyl isomerase (cyclophilin)-like ; supported by cDNA: gi_17063169_gb_AY062106.1_                                                           | 246980_at   | 2.6 |
| hypothetical protein predicted by genemark.hmm; supported by full-length cDNA: Ceres: 144447.                                                         | 246582_at   | 2.6 |
| UDP glucose:flavonoid 3-o-glucosyltransferase -like protein UDP glucose:flavonoid 3-o-glucosyltransferase, Vitis vinifera, EMBL:AF000372              | 246468_at   | 2.6 |
| RGa-like protein putative member of the VHIID domain transcription factor family RGAL - Arabidopsis thaliana, EMBL:AJ224957                           | 246432_at   | 2.6 |
| sucrose-phosphate synthase-like protein sucrose-phosphate synthase (EC 2.4.1.14) isoform 1 - Citrus unshiu, EMBL:AB005023; supported by cDN           | 246076_at   | 2.6 |
| 4-alpha-glucanotransferase                                                                                                                            | 245094_at   | 2.6 |
| hypothetical protein                                                                                                                                  | 245477_at   | 2.5 |
| putative cinnamoyl CoA reductase ;supported by full-length cDNA: Ceres:14133.                                                                         | 266578_at   | 2.5 |
| unknown protein                                                                                                                                       | 266503_at   | 2.5 |
| putative pectinesterase ; supported by full-length cDNA: Ceres: 25729.                                                                                | 266488_at   | 2.5 |
| unknown protein ; supported by cDNA: gi_14334955_gb_AY035151.1_                                                                                       | 265629_at   | 2.5 |
| hypothetical protein similar to receptor-like protein kinase GI:7529754 from [Arabidopsis thaliana]                                                   | 264479_at   | 2.5 |
| unknown protein                                                                                                                                       | 263296_at   | 2.5 |
| FtsH protease, putative similar to zinc dependent protease GI:7650138 from [Arabidopsis thaliana]                                                     | 262626_at   | 2.5 |
| hypothetical protein predicted by genemark.hmm;supported by full-length cDNA: Ceres:19976.                                                            | 262369_at   | 2.5 |
| unknown protein                                                                                                                                       | 258425_at   | 2.5 |
| glucose-6-phosphate 1-dehydrogenase, putative similar to glucose-6-phosphate 1-dehydrogenase GB:CAB52674 from [Arabidopsis thaliana] (Plan            | 257144_at   | 2.5 |
| hypothetical protein                                                                                                                                  | 255449_at   | 2.5 |
| putative protein                                                                                                                                      | 253343_at   | 2.5 |
| putative sugar transporter protein sugar transporter, Arabidopsis thaliana, db_xref=PID:g1495273                                                      | 253188_at   | 2.5 |
| Spot 3 protein and vacuolar sorting receptor homolog/AIELP1 ; supported by cDNA: gi_15081792_gb_AY048289.1_                                           | 252027_at   | 2.5 |
| imbibition protein homolog probable imbibition protein - Brassica oleracea, PIR:S45033; supported by cDNA: gi_15292676_gb_AY050772.1_                 | 251642_at   | 2.5 |
| putative protein                                                                                                                                      | 251490_at   | 2.5 |
| putative protein kinesin light chain - Plectonema boryanum, EMBL:U78597;supported by full-length cDNA: Ceres:118233.                                  | 251030_at   | 2.5 |
| transcription factor-like protein ;supported by full-length cDNA: Ceres:114015.                                                                       | 250688_at   | 2.5 |
| putative protein similar to unknown protein (sp P37707);supported by full-length cDNA: Ceres:6903.                                                    | 249237_at   | 2.5 |
| unknown protein                                                                                                                                       | 248158_at   | 2.5 |
| ribosomal protein L36                                                                                                                                 | 244980_at   | 2.5 |
| protein kinase - like protein wall-associated kinase 4, Arabidopsis thaliana, AJ009695;supported by full-length cDNA: Ceres:13355.                    | 251600_at   | 2.5 |
| unknown protein highly similar to T21L14.19; similar to GP 2191153 AF007269 and GP 2252859 AF013294                                                   | 267644_s_at | 2.4 |
| ferredoxin-dependent glutamate synthase (GLU2)                                                                                                        | 266365_at   | 2.4 |
| unknown protein ; supported by cDNA: gi_14517457_gb_AY039564.1_                                                                                       | 264987_at   | 2.4 |
| stress related protein, putative similar to stress related protein GI:5802955 from [Vitis riparia];supported by full-length cDNA: Ceres:14043.        | 264968_at   | 2.4 |

|                                                                                                                                                                                                                                                                                                                  |             |     |
|------------------------------------------------------------------------------------------------------------------------------------------------------------------------------------------------------------------------------------------------------------------------------------------------------------------|-------------|-----|
| aspartic protease, putative similar to aspartic protease GI:1326164 from [Brassica napus]                                                                                                                                                                                                                        | 264741_at   | 2.4 |
| potassium transporter, putative similar to potassium transporter GI:2654088 from [Arabidopsis thaliana]                                                                                                                                                                                                          | 264338_at   | 2.4 |
| unknown protein                                                                                                                                                                                                                                                                                                  | 264156_at   | 2.4 |
| aldehyde oxidase identical to GP:3172044:gnl:PID:d1029570:AB010080; supported by cDNA: gi_5672671_dbj_AB016622.1_AB016622                                                                                                                                                                                        | 263570_at   | 2.4 |
| bZIP transcription factor (POSF21) identical to GB:Q04088; supported by cDNA: gi_15982853_gb_AY057534.1_                                                                                                                                                                                                         | 263253_at   | 2.4 |
| putative zinc-binding protein similar to zinc-binding protein (gj3249068)                                                                                                                                                                                                                                        | 263259_at   | 2.4 |
| CCAAT-binding factor B subunit, putative similar to CCAAT-binding factor B subunit GI:1173617 [Brassica napus]; supported by cDNA: gi_1442343;                                                                                                                                                                   | 263158_at   | 2.4 |
| hypothetical protein predicted by genemark.hmm                                                                                                                                                                                                                                                                   | 263127_at   | 2.4 |
| unknown protein strong similarity to gb Y09533 involved in starch metabolism from Solanum tuberosum and contains a PF 01326 Pyruvate phosphatase                                                                                                                                                                 | 262784_at   | 2.4 |
| jacalin, putative similar to jacalin GI:289164 from [Artocarpus heterophyllus]                                                                                                                                                                                                                                   | 262357_at   | 2.4 |
| unknown protein ; supported by cDNA: gi_13937194_gb_AF372951.1_AF372951                                                                                                                                                                                                                                          | 262164_at   | 2.4 |
| unknown protein contains similarity to eukaryotic initiation factor 4B GI:6739515 from [Triticum aestivum]; supported by cDNA: gi_14335083_gb_AY052723.1_                                                                                                                                                        | 261827_at   | 2.4 |
| unknown protein ; supported by cDNA: gi_15450710_gb_AY052723.1_                                                                                                                                                                                                                                                  | 260794_at   | 2.4 |
| unknown protein predicted by genefinder; similar to GP 2194125                                                                                                                                                                                                                                                   | 260565_at   | 2.4 |
| hypothetical protein ; supported by cDNA: gi_15081631_gb_AY048208.1_                                                                                                                                                                                                                                             | 259516_at   | 2.4 |
| unknown protein ; supported by full-length cDNA: Ceres: 20582.                                                                                                                                                                                                                                                   | 259403_at   | 2.4 |
| putative serine/threonine protein kinase similar to serine/threonine-specific kinase GB:S68589 [Arabidopsis thaliana]; Pfam HMM hits: putative serine/threonine phosphatase-2C similar to protein phosphatase-2C GB:AAC36699 from [Mesembryanthemum crystallinum]; supported by cDNA: gi_15146307_gb_AY049295.1_ | 258982_at   | 2.4 |
| unknown protein similar to hypothetical protein GB:CAB43880; supported by cDNA: gi_15146307_gb_AY049295.1_                                                                                                                                                                                                       | 258901_at   | 2.4 |
| subtilisin proteinase - like subtilisin-like proteinase ag12, Alnus glutinosa, PIR2:S52769; supported by cDNA: gi_16649028_gb_AY059884.1_                                                                                                                                                                        | 257056_at   | 2.4 |
| putative protein cellulose synthase catalytic subunit, Arabidopsis thaliana, gb:AF027173; supported by full-length cDNA: Ceres:112955.                                                                                                                                                                           | 254377_at   | 2.4 |
| putative protein hypothetical proteins                                                                                                                                                                                                                                                                           | 254189_at   | 2.4 |
| putative protein predicted proteins, Arabidopsis thaliana; supported by full-length cDNA: Ceres:106702.                                                                                                                                                                                                          | 252525_at   | 2.4 |
| putative protein predicted protein, Arabidopsis thaliana                                                                                                                                                                                                                                                         | 251896_at   | 2.4 |
| putative protein putative protein At2g46380 - Arabidopsis thaliana, EMBL:AC006526                                                                                                                                                                                                                                | 251753_at   | 2.4 |
| putative protein ; supported by full-length cDNA: Ceres:7731.                                                                                                                                                                                                                                                    | 251332_at   | 2.4 |
| putative protein contains similarity to remorin; supported by full-length cDNA: Ceres:28686.                                                                                                                                                                                                                     | 251010_at   | 2.4 |
| putative protein similar to unknown protein (pir T26506); supported by cDNA: gi_16649056_gb_AY059898.1_                                                                                                                                                                                                          | 249797_at   | 2.4 |
| unknown protein                                                                                                                                                                                                                                                                                                  | 249165_at   | 2.4 |
| ABC transporter protein 1-like ; supported by cDNA: gi_15912314_gb_AY056435.1_                                                                                                                                                                                                                                   | 247340_at   | 2.4 |
| putative protein                                                                                                                                                                                                                                                                                                 | 247222_at   | 2.4 |
| HSP100/CipB, putative similar to HSP100/CipB GI:9651530 [Phaseolus lunatus]                                                                                                                                                                                                                                      | 246946_at   | 2.4 |
| alpha-galactosidase - like protein alpha-galactosidase, coffee, PIR:T50781; supported by full-length cDNA: Ceres:156141.                                                                                                                                                                                         | 246554_at   | 2.4 |
| Dr4(protease inhibitor) identical to Dr4 GI:469114 from [Arabidopsis thaliana]; supported by cDNA: gi_13877842_gb_AF370184.1_AF370184                                                                                                                                                                            | 246036_at   | 2.4 |
| ATPase I subunit                                                                                                                                                                                                                                                                                                 | 245736_at   | 2.4 |
| ribosomal protein S8                                                                                                                                                                                                                                                                                             | 245025_at   | 2.4 |
| unknown protein                                                                                                                                                                                                                                                                                                  | 244981_at   | 2.4 |
| hypothetical protein predicted by genscan                                                                                                                                                                                                                                                                        | 244807_at   | 2.3 |
| putative glucosyl transferase an EST matching the 5' end of this gene (GB:AA065508) was originally described as polyadenylated (GB:AA006321) a                                                                                                                                                                   | 265200_s_at | 2.3 |
| lactoylglutathione lyase-like protein Similar to protein gb Z74962 from Brassica oleracea which is similar to bacterial YRN1 and HEAHIO proteins. E                                                                                                                                                              | 264372_at   | 2.3 |
| hypothetical protein contains similarity to lipid transfer protein GI:498038 from (Senecio odorus)                                                                                                                                                                                                               | 264146_at   | 2.3 |
| glucosyltransferase, putative similar to beta-(1-3)-glucosyl transferase GB:AAC62210 GI:3687658 from [Bradyrhizobium japonicum]                                                                                                                                                                                  | 263031_at   | 2.3 |
| unknown protein                                                                                                                                                                                                                                                                                                  | 262860_at   | 2.3 |
| ferrodoxin NADP oxidoreductase, putative similar to ferrodoxin NADP oxidoreductase GB:X99419 GI:1480346 from [Pisum sativum]; supported by full-length cDNA: Ceres:22                                                                                                                                            | 261806_at   | 2.3 |
| Ca2+-dependent membrane-binding protein annexin identical to GB:AAD34236 from [Arabidopsis thaliana]; supported by full-length cDNA: Ceres:22                                                                                                                                                                    | 261285_at   | 2.3 |
| unknown protein                                                                                                                                                                                                                                                                                                  | 260585_at   | 2.3 |
| unknown protein                                                                                                                                                                                                                                                                                                  | 259718_at   | 2.3 |
| hypothetical protein                                                                                                                                                                                                                                                                                             | 259570_at   | 2.3 |
| unknown protein                                                                                                                                                                                                                                                                                                  | 258264_at   | 2.3 |
| leucine-rich repeat disease resistance protein, putative, 5' partial similar to NL0C GB:AAD13302 from [Lycopersicon esculentum] (Mol. Plant Microbiol.)                                                                                                                                                          | 257592_at   | 2.3 |
| isoamylase-like protein probable isoamylase (EC 3.2.1.68) su1 - Zea mays, PIR2:T01321                                                                                                                                                                                                                            | 255070_at   | 2.3 |
| UDP rhamnose--anthocyanidin-3-glucoside rhamnosyltransferase - like protein UDP rhamnose--anthocyanidin-3-glucoside rhamnosyltransferase, P                                                                                                                                                                      | 253879_s_at | 2.3 |
| predicted protein                                                                                                                                                                                                                                                                                                | 253254_at   | 2.3 |
| starch phosphorylase H (cytosolic form) - like protein starch phosphorylase H, cytosolic isoform, Vicia faba, PIR:T12091; supported by cDNA: gi_15912314_gb_AY056435.1_                                                                                                                                          | 252468_at   | 2.3 |
| putative protein                                                                                                                                                                                                                                                                                                 | 250956_at   | 2.3 |
| diacylglycerol kinase (ATDGK1) ; supported by cDNA: gi_1374771_dbj_D63787.1_ATHATDGK1                                                                                                                                                                                                                            | 250556_at   | 2.3 |
| glucose-6-phosphate dehydrogenase                                                                                                                                                                                                                                                                                | 249372_at   | 2.3 |
| ATP-dependent Clp protease ATP-binding subunit (ClpD), ERD1 protein precursor identical to ERD1 protein GI:497629, SP:P42762 from [Arabidopsis thaliana]; supported by cDNA: gi_15912314_gb_AY056435.1_                                                                                                          | 248487_at   | 2.3 |
| auxin response factor - like protein auxin response factor 9, Arabidopsis thaliana, PIR:T08917                                                                                                                                                                                                                   | 247508_at   | 2.3 |
| putative protein myosin heavy chain, chicken, PIR:S24348; supported by full-length cDNA: Ceres:147806.                                                                                                                                                                                                           | 246796_at   | 2.3 |
| ATPase-like protein                                                                                                                                                                                                                                                                                              | 246282_at   | 2.3 |
| hypothetical protein                                                                                                                                                                                                                                                                                             | 246232_at   | 2.3 |
| PSII 47kDa protein                                                                                                                                                                                                                                                                                               | 244972_at   | 2.3 |
| ribosomal protein L14                                                                                                                                                                                                                                                                                            | 244982_at   | 2.3 |
| AMP-binding protein, putative similar to AMP-binding protein GB:CAA96521 from [Brassica napus] (Plant Mol. Biol. (1997) 33 (5), 911-922)                                                                                                                                                                         | 257196_at   | 2.2 |
| unknown protein                                                                                                                                                                                                                                                                                                  | 266874_at   | 2.2 |
| G-box binding bZIP transcription factor identical to PIR:S20885; supported by cDNA: gi_600862_gb_U17891.1_ATU17891                                                                                                                                                                                               | 266555_at   | 2.2 |
| hypothetical protein predicted by genscan                                                                                                                                                                                                                                                                        | 265902_at   | 2.2 |
| hypothetical protein predicted by genscan; supported by cDNA: gi_15028050_gb_AY045882.1_                                                                                                                                                                                                                         | 265596_at   | 2.2 |
| myrosinase-binding protein homolog, putative almost identical to myrosinase-binding protein homolog GI:2997767 from [Arabidopsis thaliana]; supported by full-length cDNA: Ceres:13385.                                                                                                                          | 265058_s_at | 2.2 |
| unknown protein ; supported by full-length cDNA: Ceres:13385.                                                                                                                                                                                                                                                    | 264985_at   | 2.2 |
| step II splicing factor, putative similar to step II splicing factor SLU7 GB:AAD13774 GI:4249705 (Homo sapiens)                                                                                                                                                                                                  | 264633_at   | 2.2 |
| hypothetical protein predicted by genscan and genefinder; supported by cDNA: gi_15450730_gb_AY053407.1_                                                                                                                                                                                                          | 263384_at   | 2.2 |
| dTDP-glucose 4,6-dehydratase, putative similar to dTDP-glucose 4,6-dehydratase GI:5921157 from [Streptomyces avermitilis]; supported by cDNA: gi_15912314_gb_AY056435.1_                                                                                                                                         | 263134_at   | 2.2 |
| hypothetical protein contains similarity to spliceosome associated protein SAP 145 GI:1173904 from [Homo sapiens]                                                                                                                                                                                                | 261872_s_at | 2.2 |
| hypothetical protein predicted by genemark.hmm                                                                                                                                                                                                                                                                   | 261113_at   | 2.2 |
| hypothetical protein predicted by genemark.hmm                                                                                                                                                                                                                                                                   | 261065_at   | 2.2 |
| putative O-linked GlcNAc transferase similar to O-linked GlcNAc transferase GB:AAB63465 [Caenorhabditis elegans]                                                                                                                                                                                                 | 258575_at   | 2.2 |
| ethylene-responsive transcriptional coactivator, putative similar to GB:AAD46402 from [Lycopersicon esculentum] (Plant J. 18 (6), 589-600 (1999)); supported by cDNA: gi_15912314_gb_AY056435.1_                                                                                                                 | 258133_at   | 2.2 |
| putative sucrose cleavage protein similar to GB:S51376 from [Solanum tuberosum]; supported by full-length cDNA: Ceres:40179.                                                                                                                                                                                     | 257970_at   | 2.2 |
| dynamitin-like protein similar to phragmoplastin GB:CAB56619 from [Nicotiana tabacum]                                                                                                                                                                                                                            | 257045_at   | 2.2 |
| hypothetical protein                                                                                                                                                                                                                                                                                             | 256384_at   | 2.2 |
| 26S proteasome regulatory subunit S12, putative nearly identical to 26S proteasome regulatory subunit S12 (MOV34 ) SP:O24412 [Arabidopsis thaliana]; supported by full-length cDNA: Ceres:40179.                                                                                                                 | 256249_at   | 2.2 |
| putative protein                                                                                                                                                                                                                                                                                                 | 254807_at   | 2.2 |
| putative protein Mei2-like protein, Arabidopsis thaliana, gb:D86122                                                                                                                                                                                                                                              | 254679_at   | 2.2 |
| putative protein hypothetical protein, Synechocystis sp., PIR2:S76701                                                                                                                                                                                                                                            | 254642_at   | 2.2 |
| putative protein Arabidopsis thaliana nap gene, PID:e1234813; supported by full-length cDNA: Ceres:38344.                                                                                                                                                                                                        | 253872_at   | 2.2 |

|                                                                                                                                                                    |             |     |
|--------------------------------------------------------------------------------------------------------------------------------------------------------------------|-------------|-----|
| protein phosphatase 2C - like protein protein phosphatase 2C, Schizosaccharomyces pombe, PIR2:S54297; supported by cDNA: gi_16209697_gb_                           | 253453_at   | 2.2 |
| abscisic acid responsive elements-binding factor(ABF3) identical to abscisic acid responsive elements-binding factor (ABF3) GI:6739280 from [Arabidopsis thaliana] | 253263_at   | 2.2 |
| ABC transporter-like protein glutathione-conjugate transporter AtMRP4 - Arabidopsis thaliana, EMBL:AJ002584                                                        | 251227_at   | 2.2 |
| heat shock protein 70 (Hsc70-5) ; supported by cDNA: gi_6746589_gb_AF217458.1_AF217458                                                                             | 250502_at   | 2.2 |
| putative protein similar to unknown protein (gb)AAD21732.1)                                                                                                        | 249850_at   | 2.2 |
| sigma-like factor (emb CAA77213.1)                                                                                                                                 | 249769_at   | 2.2 |
| putative protein nucleoid DNA-binding protein cnd41, chloroplast, common tobacco, PIR:T01996; supported by cDNA: gi_15809849_gb_AY054192.                          | 249626_at   | 2.2 |
| putative protein similar to unknown protein (pir)T05035)                                                                                                           | 248959_at   | 2.2 |
| prematurely terminated mRNA decay factor-like protein                                                                                                              | 248816_at   | 2.2 |
| spermidine synthase ;supported by full-length cDNA: Ceres:33021.                                                                                                   | 248248_at   | 2.2 |
| putative protein contains similarity to protein kinase                                                                                                             | 247918_at   | 2.2 |
| ABC transporter homolog PnATH - like PnATHABC transporter homolog, Populus nigra, EMBL:AB041505                                                                    | 247593_at   | 2.2 |
| receptor-like protein kinase ; supported by cDNA: gi_16974576_gb_AY060554.1_                                                                                       | 247357_at   | 2.2 |
| sucrose-UDP glucosyltransferase                                                                                                                                    | 245998_at   | 2.2 |
| hypothetical protein predicted by genemark.hmm                                                                                                                     | 245724_at   | 2.2 |
| gibberellin 2- oxidase identical to gibberellin 2- oxidase GI:4678366 from [Arabidopsis thaliana];supported by full-length cDNA: Ceres:156482.                     | 260773_at   | 2.2 |
| putative protein auxin-induced protein 10A -Glycine max,PID:g255579                                                                                                | 254809_at   | 2.2 |
| unknown protein                                                                                                                                                    | 257476_at   | 2.1 |
| putative DNA2-NAM7 helicase family protein                                                                                                                         | 267489_s_at | 2.1 |
| putative thiamin biosynthesis protein                                                                                                                              | 266673_at   | 2.1 |
| unknown protein predicted by genscan; supported by cDNA: gi_16930416_gb_AF419562.1_AF419562                                                                        | 265664_at   | 2.1 |
| hypothetical protein contains Pfam profile: PF01363 FYVE zinc finger; supported by full-length cDNA: Ceres: 15739.                                                 | 265035_at   | 2.1 |
| receptor-like protein glossy1 (gl1), putative similar to receptor-like protein glossy1 (gl1) GI:1209703 from (Arabidopsis thaliana)                                | 264147_at   | 2.1 |
| starch branching enzyme II                                                                                                                                         | 263912_at   | 2.1 |
| unknown protein                                                                                                                                                    | 263870_at   | 2.1 |
| putative aspartate kinase-homoserine dehydrogenase almost identical to gb)X71364 gene for aspartate kinase homoserine dehydrogenase from Ara                       | 263696_at   | 2.1 |
| transcription factor ZAP1 identical to GP:1064883:X92976                                                                                                           | 263626_at   | 2.1 |
| putative tetracycline transporter protein                                                                                                                          | 263574_at   | 2.1 |
| purple acid phosphatase precursor identical to SP:Q38924                                                                                                           | 263083_at   | 2.1 |
| unknown protein ;supported by full-length cDNA: Ceres:35675.                                                                                                       | 262050_at   | 2.1 |
| DYW7 protein identical to DWY7 protein of unknown function GB:CAA06829 from [Arabidopsis thaliana] (Plant Mol. Biol. 42 (4), 603-613 (2000))                       | 261133_at   | 2.1 |
| unknown protein                                                                                                                                                    | 260995_at   | 2.1 |
| scarecrow-like 1 identical to scarecrow-like 1 GB:AAF21043 GI:6644390 from [Arabidopsis thaliana];supported by full-length cDNA: Ceres:109490.                     | 260878_at   | 2.1 |
| Expressed protein ; supported by full-length cDNA: Ceres: 13270.                                                                                                   | 260670_at   | 2.1 |
| putative P-type transporting ATPase similar to ATPase II GB:AAD34706 [Homo sapiens]                                                                                | 259910_at   | 2.1 |
| hypothetical protein similar to hypothetical protein GB:AAB72157 [Arabidopsis thaliana];supported by full-length cDNA: Ceres:1132.                                 | 259012_at   | 2.1 |
| putative cytochrome P450 similar to cytochrome P450 71B2 GB:O65788 [Arabidopsis thaliana]                                                                          | 258277_at   | 2.1 |
| putative MAP kinase similar to GB:AAD52659 from [Oryza sativa]                                                                                                     | 258119_at   | 2.1 |
| HAPp48.5 protein identical to HAPp48.5 GB:Y09562 [Arabidopsis thaliana]                                                                                            | 256902_s_at | 2.1 |
| hypothetical protein                                                                                                                                               | 255621_at   | 2.1 |
| putative fibrillin ; supported by full-length cDNA: Ceres: 1461.                                                                                                   | 255364_s_at | 2.1 |
| putative beta-glucosidase beta-glucosidase BGQ60 precursor - barley, PIR2:A57512; supported by cDNA: gi_15982821_gb_AY057518.1_                                    | 253841_at   | 2.1 |
| putative protein                                                                                                                                                   | 253407_at   | 2.1 |
| putative protein F35D11.3, Caenorhabditis elegans, PATX:G868225                                                                                                    | 253081_at   | 2.1 |
| putative protein KIAA0274 protein, Homo sapiens, SWISSPROT:Y274_HUMAN                                                                                              | 252737_at   | 2.1 |
| putative protein various predicted proteins                                                                                                                        | 252246_at   | 2.1 |
| putative protein putative DNA binding protein - Arabidopsis thaliana, TREMBL:ATAC2339_3; supported by cDNA: gi_16649060_gb_AY059900.1_                             | 251644_at   | 2.1 |
| putative protein several hypothetical proteins - different bacteria                                                                                                | 251137_at   | 2.1 |
| polyubiquitin (UBQ3) identical to GI:928809; supported by full-length cDNA: Ceres: 20908.                                                                          | 250935_at   | 2.1 |
| DREB2A (dbj)BAA33794.1) ; supported by cDNA: gi_3738229_dbj_AB007790.1_AB007790                                                                                    | 250781_at   | 2.1 |
| tetrahydrofolylpolyglutamate synthase-like protein                                                                                                                 | 250757_at   | 2.1 |
| ubiquitin-specific protease 12 (UBP12) almost identical to ubiquitin-specific protease 12 GI:11993471 [Arabidopsis thaliana], one amino acid differen              | 250693_at   | 2.1 |
| putative protein                                                                                                                                                   | 250158_at   | 2.1 |
| ubiquitin C-terminal hydrolase-like protein ;supported by full-length cDNA: Ceres:8635.                                                                            | 250126_at   | 2.1 |
| NAM (no apical meristem)-like protein ; supported by cDNA: gi_14326464_gb_AF385685.1_AF385685                                                                      | 249944_at   | 2.1 |
| putative protein contains similarity to G-box binding factor;supported by full-length cDNA: Ceres:25211.                                                           | 249074_at   | 2.1 |
| ATP-dependent Clp protease ATP-binding subunit (ClpC1) almost identical to ClpC GI:2921158 from [Arabidopsis thaliana]                                             | 248480_at   | 2.1 |
| unknown protein ;supported by full-length cDNA: Ceres:534.                                                                                                         | 248218_at   | 2.1 |
| protein phosphatase 2C ABI2 (PP2C) (sp)O04719)                                                                                                                     | 247957_at   | 2.1 |
| Fdr1 Cen - like protein Fdr1, Oryza sativa, EMBL:AF159883                                                                                                          | 247511_at   | 2.1 |
| putative protein strong similarity to unknown protein (emb)CAB62118.1)                                                                                             | 247032_at   | 2.1 |
| AP2 domain containing protein AP2 domain containing protein RAP2.4 - Arabidopsis thaliana, EMBL:AF003097                                                           | 246939_at   | 2.1 |
| glycine hydroxymethyltransferase - like protein glycine hydroxymethyltransferase, Solanum tuberosum, EMBL:Z25863; supported by cDNA: gi_1433                       | 246800_at   | 2.1 |
| putative protein auxin-independent growth promoter - Nicotiana tabacum, PIR:A44226                                                                                 | 246516_at   | 2.1 |
| AtIPP -like protein AtIPP protein, Brassica napus, EMBL:BNA245479; supported by cDNA: gi_15293070_gb_AY050969.1_                                                   | 246340_s_at | 2.1 |
| putative protein                                                                                                                                                   | 246285_at   | 2.1 |
| hypothetical protein similar to putative ubiquitin GI:4415931 from [Arabidopsis thaliana]; supported by cDNA: gi_14334681_gb_AY035014.1_                           | 245821_at   | 2.1 |
| trehalose-6-phosphate synthase like protein ;supported by full-length cDNA: Ceres:95947.                                                                           | 245348_at   | 2.1 |
| putative protein ATP/GTP nucleotide-binding protein, Leishmania infantum, EMBL:LIIIMNBA; supported by cDNA: gi_14423543_gb_AF387009.1_AF                           | 247521_at   | 2.1 |
| putative ubiquitin fusion-degradation protein                                                                                                                      | 266776_at   | 2   |
| hypothetical protein                                                                                                                                               | 251522_at   | 2   |
| putative salt-inducible protein                                                                                                                                    | 257395_at   | 2   |
| unknown protein                                                                                                                                                    | 267498_at   | 2   |
| putative UDP-galactose-4-epimerase                                                                                                                                 | 267429_at   | 2   |
| putative receptor-like protein kinase, ERECTA identical to GB:U47029 and GB:D83257; contains a protein kinase domain profile (PDOC00100); con                      | 267376_at   | 2   |
| ABC transporter (AtMRP2) identical to GB:AF014960; transports glutathione conjugates; supported by cDNA: gi_2909780_gb_AF020288.1_AF0202                           | 267319_at   | 2   |
| hypothetical protein predicted by genefinder; supported by cDNA: gi_16323181_gb_AY057695.1_                                                                        | 267248_at   | 2   |
| hypothetical protein predicted by genscan                                                                                                                          | 266405_at   | 2   |
| putative mitochondrial translation elongation factor G                                                                                                             | 266127_s_at | 2   |
| putative SEC1 family transport protein similar to SLY1 proteins and vesicle transport proteins; supported by cDNA: gi_15215769_gb_AY050414.1_                      | 265822_at   | 2   |
| similar to flavin-binding monooxygenase-like protein (Z71258); similar to ESTs gb)R30018 and gb)H36886 similar to flavin-containing monooxygenas                   | 265122_at   | 2   |
| hypothetical protein predicted by genemark.hmm                                                                                                                     | 264748_at   | 2   |
| putative isoamylase Similar to gi)1652733 glycogen operon protein GlgX from Synechocystis sp. genome gb)D90908. ESTs gb)H36690, gb)AA71241                         | 264360_at   | 2   |
| putative protein phosphatase 2C ;supported by full-length cDNA: Ceres:22316.                                                                                       | 263711_at   | 2   |
| unknown protein                                                                                                                                                    | 263545_at   | 2   |
| putative myo-inositol 1-phosphate synthase ; supported by cDNA: gi_15450746_gb_AY053415.1_                                                                         | 263433_at   | 2   |
| unknown protein ESTs gb)H37032, gb)R6425, gb)Z34651, gb)N37268, gb)AA713172 and gb)Z34241 come from this gene;supported by full-length cl                          | 262600_at   | 2   |

26S proteasome ATPase subunit, putative similar to 26S proteasome ATPase subunit GI:1395190 from [Spinacia oleracea];supported by full-length 262227\_s\_at 2

homeobox transcription factor Hox7, putative similar to homeobox transcription factor Hox7 GI:19486 from [Lycopersicon peruvianum] 261494\_at 2

hypothetical protein predicted by genemark.hmm 261176\_at 2

hypothetical protein predicted by genemark.hmm 261177\_at 2

putative endochitinase 260560\_at 2

putative two-component phosphorelay mediator similar to two-component phosphorelay mediators (ATHP1-3) GB:BAA37110, GB:BAA37111, GB:B. 259329\_at 2

putative disease resistance protein similar to putative disease resistance protein GB:AAF01514 from clone F9F8 258893\_at 2

putative disease resistance protein similar to putative disease resistance protein GB:AAF01514 from clone F9F8 258894\_at 2

putative phospholipase D similar to phospholipase D1 GB:AACT8487 [Brassica oleracea], GB:Q38882 [Arabidopsis thaliana]; supported by cDNA: g 258226\_at 2

hypothetical protein 258245\_at 2

heat shock transcription factor HSF1, putative similar to GB:S52641 from [Arabidopsis thaliana] (Plant Mol. Biol. 26, 353-362 (1994)); supported by c 258139\_at 2

unknown protein contains Pfam profiles: PF00036 EF hand (2 copies); supported by cDNA: gi\_14334439\_gb\_AY034911.1\_ 257677\_at 2

UDP-glucose glucosyltransferase, putative similar to UDP-glucose glucosyltransferase GI:3928543 from [Arabidopsis thaliana]; supported by cDNA: 255943\_at 2

putative NAM-like protein 255585\_at 2

hypothetical protein similar to C. elegans protein B0414.8, GenBank accession number 2088768 255560\_at 2

5-adenylylsulfate reductase ;supported by full-length cDNA: Ceres:40330. 255284\_at 2

putative ABC transporter similar to Guillardia theta ABC transporter, GenBank accession number AF041468; supported by cDNA: gi\_15529142\_gb\_ 255305\_at 2

putative microfibril-associated protein 255093\_s\_at 2

putative protein anthocyanin rhamnosyltransferase -Petunia x hybrida, PID:g454253 255032\_at 2

putative major latex protein major latex protein type 1 - Arabidopsis thaliana, EMBL:X91960;supported by full-length cDNA: Ceres:108949. 254225\_at 2

ABC transporter - like protein ABC transporter-7, Mus musculus, gb:U43892; supported by cDNA: gi\_9964118\_gb\_AF287698.1\_AF287698 253785\_s\_at 2

glycine-rich protein glycine-rich cell wall structural protein - garden petunia, Pir2:A26099 253619\_at 2

putative protein phospholipase D, Arabidopsis thaliana, gb:U84568; supported by cDNA: gi\_11761141\_dbj\_AB031047.1\_AB031047 253120\_at 2

beta-galactosidase like protein ; supported by cDNA: gi\_15810492\_gb\_AY056285.1\_ 253090\_at 2

phosphoenolpyruvate carboxylase (ATP) -like protein ; supported by cDNA: gi\_13937136\_gb\_AF372922.1\_AF372922 253041\_at 2

Expressed protein ; supported by full-length cDNA: Ceres: 151603. 252365\_at 2

putative protein 250946\_at 2

serine/threonine-protein kinase 250527\_at 2

putative protein predicted proteins, Arabidopsis thaliana and Drosophila melanogaster 250516\_at 2

putative protein unnamed ORF cDNA FLJ10872, Homo sapiens, EMBL:AK001734; supported by cDNA: gi\_14532679\_gb\_AY039964.1\_ 250402\_at 2

putative protein similar to unknown protein (gb)AAF00631.1);supported by full-length cDNA: Ceres:10299. 250028\_at 2

prolycarboxypeptidase-like protein ;supported by full-length cDNA: Ceres:122449. 249860\_at 2

tryptophan synthase beta chain 249515\_at 2

glathione transferase-like ;supported by full-length cDNA: Ceres:37349. 249316\_s\_at 2

unknown protein ;supported by full-length cDNA: Ceres:253359. 248228\_at 2

HEAT SHOCK PROTEIN 81-2 (HSP81-2) (sp)P55737 248045\_at 2

ARF1-binding protein ; supported by cDNA: gi\_2245393\_gb\_U89771.1\_ATU89771 247468\_at 2

putative protein similar to unknown protein (emb)CAB77570.1) 247323\_at 2

putative protein predicted proteins, Arabidopsis thaliana and Drosophila melanogaster 246897\_at 2

putative protein predicted protein, Drosophila melanogaster 246139\_at 2

calcium-dependent protein kinase ; supported by cDNA: gi\_836941\_gb\_U20624.1\_ATU20624 246044\_at 2

unknown protein 245787\_at 2

proline-rich protein, putative similar to proline-rich protein GI:3242079 from [Capsicum annuum]; supported by cDNA: gi\_14334847\_gb\_AY035097.1 245749\_at 2

pyruvate,orthophosphate dikinase 245528\_at 2

putative beta-amylase ;supported by full-length cDNA: Ceres:36882. 245346\_at 2

transcriptional adaptor like protein ; supported by cDNA: gi\_15215639\_gb\_AY050348.1\_ 245288\_at 2

putative protein similarity to UVB-resistance protein UVR8, Arabidopsis thaliana, PIR:T50662-Contains Regulator of chromosome condensation (RC 245210\_at 2

ribosomal protein L22 244985\_at 2

NADH dehydrogenase 49KDa protein 244937\_at 2

putative RING zinc finger protein 267581\_at 1.9

E2, ubiquitin-conjugating enzyme, putative 267456\_at 1.9

putative alcohol dehydrogenase 267168\_at 1.9

Expressed protein ; supported by full-length cDNA: Ceres: 34622. 266537\_at 1.9

putative tropinone reductase 266278\_at 1.9

putative peptide/amino acid transporter 266108\_at 1.9

NADC homolog identical to GP|1216074|gn|PID|e225599|F20096;supported by full-length cDNA: Ceres:2877. 265738\_at 1.9

unknown protein ; supported by full-length cDNA: Ceres: 122665. 265457\_at 1.9

unknown protein predicted by genefinder 265344\_at 1.9

similar to flavin-containing monooxygenase (sp)P36366; similar to ESTs gb|R30018, gb|H36886, gb|N37822, and gb|T88100 similar to flavin-contai 265121\_at 1.9

putative senescence-associated protein 12 ; supported by full-length cDNA: Ceres:40806. 264787\_at 1.9

hypothetical protein contains similarity to glycogenin GI:165512 from [Oryctolagus cuniculus] 264476\_at 1.9

putative ABC transporter related to multi drug resistance proteins and P-glycoproteins 263865\_at 1.9

putative kinesin heavy chain 263751\_at 1.9

unknown protein ;supported by full-length cDNA: Ceres:31655. 263517\_at 1.9

cold-regulated protein cor15a precursor ; supported by cDNA: gi\_14532457\_gb\_AY039853.1\_ 263497\_at 1.9

ent-kaurene synthase, putative similar to ent-kaurene synthase GI:3056725 from [Arabidopsis thaliana]; supported by cDNA: gi\_3056724\_gb\_AF03 262891\_at 1.9

unknown protein Location of est 278F3T7 (gb)AA650690) 262521\_at 1.9

amp-binding protein, putative similar to amp-binding protein GI:1903033 from [Brassica napus]; supported by cDNA: gi\_15215765\_gb\_AY050412.1\_ 261922\_at 1.9

abscisic acid responsive elements-binding factor identical to abscisic acid responsive elements-binding factor GB:AAF27179 GI:6739274 from [Arabi 261613\_at 1.9

hypothetical protein predicted by genemark.hmm; supported by cDNA: gi\_15451209\_gb\_AY054685.1\_ 260987\_at 1.9

MYB-related protein identical to GB:CAA90748 GI:1263093 from [Arabidopsis thaliana] 260784\_at 1.9

phosphoenolpyruvate carboxylase 1, putative similar to phosphoenolpyruvate carboxylase 1 GI:2266947 from [Gossypium hirsutum]; supported by c 260590\_at 1.9

hypothetical protein similar to CCAAT-box-binding transcription factor GB:NP\_005751 [Homo sapiens], GB:P53569 [Mus musculus] 260425\_at 1.9

unknown protein 260162\_at 1.9

putative ATPase contains Pfam profile: PF00004 ATPases associated with various cellular activities (AAA) 260089\_at 1.9

feebly-like protein similar to feebly protein GB:S70648 [Lycopersicon esculentum] (tomato knockout developed into small fragile plants) 260060\_at 1.9

hypothetical protein predicted by genscan+ 259899\_at 1.9

unknown protein ; supported by cDNA: gi\_16930412\_gb\_AF419560.1\_AF419560 259418\_at 1.9

unknown protein similar to hypothetical proteins GB:P73627, GB:Q55884, GB:P73121 [Synechocystis sp.]; supported by full-length cDNA: Ceres: 9 259226\_at 1.9

putative histidyl tRNA synthetase similar to histidyl tRNA synthetase GB:NP\_032240 [Mus musculus] 258801\_at 1.9

putative leucine-rich repeat transmembrane protein kinase similar to leucine-rich repeat transmembrane protein kinase 1 GB:AAC27894 from [Zea m 258357\_at 1.9

putative casein kinase I similar to casein kinase I GB:CAA55396 from [Arabidopsis thaliana]; supported by cDNA: gi\_15809823\_gb\_AY054179.1\_ 258300\_at 1.9

protein kinase, putative similar to serine/threonine protein kinase GB:NP\_032667 from [Mus musculus] 258186\_s\_at 1.9

UDP-glucose:indole-3-acetate beta-D-glucosyltransferase, putative similar to UDP-glucose:indole-3-acetate beta-D-glucosyltransferase GB:AAB584 258167\_at 1.9

putative cytochrome P450 similar to GB:Q05047 from [Catharanthus roseus]; supported by cDNA: gi\_15292786\_gb\_AY050827.1\_ 258094\_at 1.9

putative 4-coumarate:CoA ligase 2 almost identical (1 amino acid difference) to GB:AAD47192 from [Arabidopsis thaliana]; supported by cDNA: gi\_5 258047\_at 1.9

unknown protein 257612\_at 1.9

|                                                                                                                                                                                        |             |     |
|----------------------------------------------------------------------------------------------------------------------------------------------------------------------------------------|-------------|-----|
| unknown protein contains Pfam profile:PF00439 bromodomain:Bromodomain                                                                                                                  | 257146_at   | 1.9 |
| CDPK-related kinase identical to GB:2AAD38059 from [Arabidopsis thaliana]                                                                                                              | 257024_at   | 1.9 |
| hypothetical protein contains similarity to flavanone-3-hydroxylase GB:Q05965 from [Matthiola incana], contains Pfam profile: PF00671 Iron/Ascorbic acid oxidase                       | 256892_at   | 1.9 |
| hypothetical protein predicted by genscan+                                                                                                                                             | 256823_at   | 1.9 |
| unknown protein                                                                                                                                                                        | 256577_at   | 1.9 |
| hypothetical protein predicted by genscan+                                                                                                                                             | 256089_at   | 1.9 |
| unknown protein ;supported by full-length cDNA: Ceres:36434.                                                                                                                           | 256061_at   | 1.9 |
| putative potassium/H <sup>+</sup> antiporter                                                                                                                                           | 255686_at   | 1.9 |
| putative ribosomal protein L19 similar to L19 from several species; supported by cDNA: gi_14423511_gb_AF386993.1_AF386993                                                              | 255520_at   | 1.9 |
| UV-damaged DNA binding factor - like protein XPE UV-damaged DNA binding factor, Mus musculus, BAA84699                                                                                 | 255226_at   | 1.9 |
| copper amine oxidase like protein (fragment2) copper amine oxidase - Cicer arietinum,PID:e1335964                                                                                      | 254833_s_at | 1.9 |
| 3-hydroxyisobutyryl-coenzyme A hydrolase - like protein 3-hydroxyisobutyryl-coenzyme A hydrolase, Homo sapiens, U66669;supported by full-length cDNA: gi_15293092_gb_AY050980.1        | 254776_at   | 1.9 |
| putative disease resistance protein Hcr9-9A, Lycopersicon pimpinellifolium, gb:AJ002236                                                                                                | 254741_s_at | 1.9 |
| cytochrome P450 cytochrome P450, Arabidopsis thaliana; supported by cDNA: gi_15293092_gb_AY050980.1                                                                                    | 254562_at   | 1.9 |
| putative protein zinc finger protein, Arabidopsis thaliana, PID:g2340088; supported by cDNA: gi_15982926_gb_AY057571.1                                                                 | 254210_at   | 1.9 |
| putative protein ; supported by cDNA: gi_11177136_dbj_AB050977.1_AB050977                                                                                                              | 253610_at   | 1.9 |
| putative protein F56F10.1, Caenorhabditis elegans, PATX:G1688051                                                                                                                       | 253079_s_at | 1.9 |
| formamidase - like protein formamidase, Methylophilus methylotrophus, PIR2:S74213; supported by cDNA: gi_14334653_gb_AY035000.1                                                        | 253048_at   | 1.9 |
| putative protein predicted protein, Arabidopsis thaliana                                                                                                                               | 252016_at   | 1.9 |
| putative protein predicted protein, Arabidopsis thaliana                                                                                                                               | 251937_at   | 1.9 |
| protein kinase -like protein protein kinase APK1, Arabidopsis thaliana, PIR:S28615;supported by full-length cDNA: Ceres:150889.                                                        | 251922_at   | 1.9 |
| putative protein leucine zipper-EF-hand containing transmembrane protein 1 - Mus musculus, EMBL:AF061026                                                                               | 251432_at   | 1.9 |
| putative protein different MAP kinases                                                                                                                                                 | 251165_at   | 1.9 |
| ferritin 1 precursor ;supported by full-length cDNA: Ceres:1100.                                                                                                                       | 251109_at   | 1.9 |
| putative protein ABI3-interacting protein, Arabidopsis thaliana, EMBL:ATH251086; supported by cDNA: gi_14532637_gb_AY039943.1                                                          | 250971_at   | 1.9 |
| sorting nexin-like protein                                                                                                                                                             | 250714_at   | 1.9 |
| putative protein similar to unknown protein (gb)AAF19552.1)                                                                                                                            | 250303_at   | 1.9 |
| transporter-like protein ;supported by full-length cDNA: Ceres:27439.                                                                                                                  | 250252_at   | 1.9 |
| kinase - like protein RING3 protein, Homo sapiens, EMBL:X96670; supported by cDNA: gi_16604680_gb_AY059785.1                                                                           | 250191_at   | 1.9 |
| putative protein predicted protein, Arabidopsis thaliana                                                                                                                               | 250050_at   | 1.9 |
| putative protein similar to unknown protein (gb)AAC80581.1)                                                                                                                            | 249908_at   | 1.9 |
| acetyl-CoA synthetase-like protein                                                                                                                                                     | 249869_at   | 1.9 |
| putative protein contains similarity to integral membrane protein                                                                                                                      | 249759_at   | 1.9 |
| putative protein                                                                                                                                                                       | 249622_at   | 1.9 |
| disease resistance protein-like non-consensus TT donor splice site at exon 1                                                                                                           | 249320_at   | 1.9 |
| N-carbamyl-L-amino acid amidohydrolase-like protein                                                                                                                                    | 249103_at   | 1.9 |
| putative protein strong similarity to unknown protein (pir)[E71441]; supported by cDNA: gi_16974604_gb_AY060580.1                                                                      | 248766_at   | 1.9 |
| putative protein contains similarity to unknown protein (gb)AAF49898.1); supported by cDNA: gi_15724227_gb_AF412054.1_AF412054                                                         | 248549_at   | 1.9 |
| putative protein contains similarity to nuclear movement protein nudC;supported by full-length cDNA: Ceres:38105.                                                                      | 248258_at   | 1.9 |
| O-methyltransferase ;supported by full-length cDNA: Ceres:33790.                                                                                                                       | 248200_at   | 1.9 |
| fimbrin                                                                                                                                                                                | 248082_at   | 1.9 |
| pyrophosphate-dependent phosphofructo-1-kinase-like protein ; supported by cDNA: gi_14532861_gb_AY040055.1                                                                             | 247983_at   | 1.9 |
| cysteine proteinase AALP identical to AALP protein GI:7230640 from [Arabidopsis thaliana]; similar to barley aleurain;supported by full-length cDNA: gi_15293092_gb_AY050980.1         | 247627_at   | 1.9 |
| succinate dehydrogenase flavoprotein alpha subunit (emb)CAA05025.1) ; supported by cDNA: gi_15010745_gb_AY045674.1                                                                     | 247060_at   | 1.9 |
| natural resistance-associated macrophage protein ; supported by cDNA: gi_6468013_gb_AF202540.1_AF202540                                                                                | 247001_at   | 1.9 |
| putative protein pyruvate water dikinase, Archaeoglobus fulgidus, PIR:F69338                                                                                                           | 246829_at   | 1.9 |
| putative protein 68 kDa protein - Cicer arietinum, EMBL:AJ276420                                                                                                                       | 246555_at   | 1.9 |
| putative protein                                                                                                                                                                       | 246343_at   | 1.9 |
| centromere protein homolog                                                                                                                                                             | 245575_at   | 1.9 |
| unknown protein                                                                                                                                                                        | 245028_at   | 1.9 |
| RNA polymerase beta subunit-1                                                                                                                                                          | 244998_at   | 1.9 |
| PSI P700 apoprotein A1                                                                                                                                                                 | 245007_at   | 1.9 |
| ferredoxin-NADP <sup>+</sup> reductase - like protein ferredoxin--NADP <sup>+</sup> reductase, Mus musculus, PIR2:S60028                                                               | 253479_at   | 1.8 |
| unknown protein ; supported by cDNA: gi_15293114_gb_AY050991.1                                                                                                                         | 267602_at   | 1.8 |
| hypothetical protein predicted by genscan; similar to GP[2623296]AC002409                                                                                                              | 267608_at   | 1.8 |
| unknown protein                                                                                                                                                                        | 267518_at   | 1.8 |
| putative alcohol dehydrogenase ; supported by cDNA: gi_16604706_gb_AY059798.1                                                                                                          | 267181_at   | 1.8 |
| putative PCI domain protein proteasome, COP9-complex and eIF3-domain protein; members of multi-protein complexes;supported by full-length cDNA: gi_15293092_gb_AY050980.1              | 266310_at   | 1.8 |
| cytochrome p450, putative similar to cytochrome p450 GI:438242 from [Solanum melongena]; supported by cDNA: gi_14334809_gb_AY035078.1                                                  | 266155_at   | 1.8 |
| contains similarity to S. cerevisiae ADR1 gene (PID:g924931) ; supported by cDNA: gi_13605528_gb_AF361590.1_AF361590                                                                   | 265908_at   | 1.8 |
| Expressed protein ; supported by full-length cDNA: Ceres: 465.                                                                                                                         | 265913_at   | 1.8 |
| unknown protein                                                                                                                                                                        | 265707_at   | 1.8 |
| unknown protein ;supported by full-length cDNA: Ceres:41585.                                                                                                                           | 265717_at   | 1.8 |
| hypothetical protein predicted by genscan and genefinder, contains a Bem1/NCF1/PI3K domain (prosite:QDOC50195)                                                                         | 265535_at   | 1.8 |
| NBS/LRR disease resistance protein, putative similar to NBS/LRR disease resistance protein GB:AAC26125 GI:3309619 from [Arabidopsis thaliana]                                          | 265109_s_at | 1.8 |
| myrosinase binding protein, putative similar to myrosinase binding protein GI:1711295 from [Brassica napus]                                                                            | 265053_at   | 1.8 |
| putative calmodulin-domain protein kinase CPK6 (calmodulin-domain protein kinase isoform 6, accession U31835); supported by cDNA: gi_1220096_gb_AY051037.1                             | 264851_at   | 1.8 |
| hypothetical protein predicted by genemark.hmm;supported by full-length cDNA: Ceres:25383.                                                                                             | 264186_at   | 1.8 |
| unknown protein                                                                                                                                                                        | 263972_at   | 1.8 |
| hypothetical protein predicted by genefinder                                                                                                                                           | 263780_at   | 1.8 |
| unknown protein similar to cell differentiation protein GB:AAC36682 from (Homo sapiens)                                                                                                | 263685_at   | 1.8 |
| putative protein RIO1 protein, Saccharomyces cerevisiae, PIR:S61006;supported by full-length cDNA: Ceres:42141.                                                                        | 263532_s_at | 1.8 |
| cytoplasmic aconitase hydratase                                                                                                                                                        | 263348_at   | 1.8 |
| putative galactinol synthase ;supported by full-length cDNA: Ceres:124236.                                                                                                             | 263320_at   | 1.8 |
| UDP-galactose 4-epimerase-like protein similar to proteins from many bacterial species including [Bacillus subtilis] and [Methanobacterium thermoautotrophicum]                        | 263221_at   | 1.8 |
| putative protein kinase Strong similarity to gb[X71057 protein kinase from Nicotiana tabacum and contains PF[00069 eukaryotic protein kinase domain]                                   | 263222_at   | 1.8 |
| domak16-like protein-related similar to MAK16 PROTEIN GB:P10962 GI:127112 from [ Saccharomyces cerevisiae] (Proc. Natl. Acad. Sci. U.S.A. 85 (1988) 1000-1004)                         | 263039_at   | 1.8 |
| unknown protein EST gb[H77143 comes from this gene; supported by cDNA: gi_15293206_gb_AY051037.1                                                                                       | 262570_at   | 1.8 |
| hypothetical protein similar to hypothetical protein GB:AAF24581 GI:6692116 from [Arabidopsis thaliana]; supported by cDNA: gi_15724299_gb_AF24581                                     | 262345_at   | 1.8 |
| ATP-dependent Clp protease proteolytic subunit (ClpR1) identical to nClpP5 GB:BAA82069 GI:5360595 from [Arabidopsis thaliana];supported by full-length cDNA: gi_15293092_gb_AY050980.1 | 261634_at   | 1.8 |
| putative GTP-binding protein similar to NGP-1 GB:Q13823 from (Homo sapiens)                                                                                                            | 261314_at   | 1.8 |
| transcription factor TINY, putative similar to transcription factor TINY GB:CAA64359 GI:1246403 from [Arabidopsis thaliana];supported by full-length cDNA: gi_15293092_gb_AY050980.1   | 261059_at   | 1.8 |
| hypothetical protein similar to Pto kinase interactor 1 GB:AAC61805 GI:3668069 from [Lycopersicon esculentum]                                                                          | 260924_at   | 1.8 |
| putative heme oxygenase similar to heme oxygenase GB:AAD22107 [Arabidopsis thaliana];supported by full-length cDNA: Ceres:101223.                                                      | 260396_at   | 1.8 |
| putative heat shock protein similar to GB:CAB03279 from [Caenorhabditis elegans]                                                                                                       | 260251_at   | 1.8 |
| putative protein kinase Pfam HMM hit: Eukaryotic protein kinase domain                                                                                                                 | 260036_at   | 1.8 |
| unknown protein ;supported by full-length cDNA: Ceres:13102.                                                                                                                           | 260005_at   | 1.8 |

|                                                                                                                                                        |             |     |
|--------------------------------------------------------------------------------------------------------------------------------------------------------|-------------|-----|
| unknown protein contains non-consensus GG donor splice site at exon2; modeled to est match.;supported by full-length cDNA: Ceres:124169.               | 260007_at   | 1.8 |
| hypothetical protein similar to GB:CAB55886 [Homo sapiens], GB:BAA09774 [Homo sapiens], GB:CAA87778 [Caenorhabditis elegans]                           | 259759_at   | 1.8 |
| unknown protein                                                                                                                                        | 259644_at   | 1.8 |
| protein kinase, putative similar to GI:7573596 from [Populus nigra]                                                                                    | 259670_at   | 1.8 |
| myosin-like protein contains Pfam profile: PF00658 Poly-adenylate binding protein, unique domain.; supported by cDNA: gi_15081708_gb_AY04824           | 259609_at   | 1.8 |
| putative lectin contains Pfam profile: PF01419 jacalin-like lectin domain; similar to jasmonate inducible protein GB:Y11483 (Brassica napus), myrosin  | 259381_s_at | 1.8 |
| unknown protein ;supported by full-length cDNA: Ceres:18355.                                                                                           | 259342_at   | 1.8 |
| unknown protein similar to unknown protein GB:AAC32238 (Arabidopsis thaliana)                                                                          | 259169_at   | 1.8 |
| reversibly glycosylated polypeptide-1 identical to reversibly glycosylated polypeptide-1 (implicated in cell wall biosynthesis) GB:AAC50000 [Arabidop: | 259077_s_at | 1.8 |
| hypothetical protein predicted by genscan                                                                                                              | 258696_at   | 1.8 |
| hypothetical protein predicted by genemark.hmm                                                                                                         | 258525_at   | 1.8 |
| putative protein disulfide isomerase similar to protein disulfide isomerase GB:AAD55566 from [Volvox carteri f. nagariensis]                           | 258329_at   | 1.8 |
| hypothetical protein contains Pfam profile: PF01055 Glycosyl hydrolases family 31; supported by cDNA: gi_16648902_gb_AY059821.1_                       | 258109_at   | 1.8 |
| unknown protein contains an RNase_PH domain;supported by full-length cDNA: Ceres:104182.                                                               | 257857_s_at | 1.8 |
| rotamase FKBP (ROF1) identical to rotamase FKBP (ROF1) GB:U49453 [Arabidopsis thaliana] (Mol. Gen. Genet. 252 (5), 510-517 (1996)); support            | 257822_at   | 1.8 |
| DNA-binding protein, putative similar to GB:AAF32491 from [Triticum aestivum] (Mol. Cell. Biol. 19 (12), 8113-8122 (1999))                             | 257291_at   | 1.8 |
| monooxygenase, putative contains Pfam profile: PF01360 Monooxygenase                                                                                   | 257240_at   | 1.8 |
| purple acid phosphatase, putative similar to purple acid phosphatase GB:CAA06921 [Ipomoea batatas]                                                     | 257087_at   | 1.8 |
| hypothetical protein predicted by genscan+                                                                                                             | 257073_at   | 1.8 |
| hypothetical protein predicted by genscan+                                                                                                             | 257044_at   | 1.8 |
| beta-amylase, putative similar to beta-amylase GB:CAB58423 [Arabidopsis thaliana]; supported by cDNA: gi_14194172_gb_AF367293.1_AF36729:               | 256861_at   | 1.8 |
| hypothetical protein predicted by genemark.hmm; supported by cDNA: gi_16930516_gb_AF419612.1_AF419612                                                  | 256858_at   | 1.8 |
| Myb-family transcription factor, putative contains Pfam profile: PF00249: Myb-like DNA-binding domain                                                  | 256198_at   | 1.8 |
| lipid transfer protein, putative similar to lipid transfer protein GI:9279661 from [Arabidopsis thaliana]; supported by cDNA: gi_15028044_gb_AY0458:   | 256145_at   | 1.8 |
| transcription factor identical to transcription factor GI:304113 from [Arabidopsis thaliana];supported by full-length cDNA: Ceres:33016.               | 255953_at   | 1.8 |
| hypothetical protein predicted by genemark.hmm;supported by full-length cDNA: Ceres:37923.                                                             | 255900_at   | 1.8 |
| putative protein                                                                                                                                       | 255527_at   | 1.8 |
| putative WD-repeat protein similar to L. erythrorhizon LEC14B, GenBank accession number Q40153                                                         | 255468_at   | 1.8 |
| predicted protein of unknown function                                                                                                                  | 255418_at   | 1.8 |
| putative methyltransferase                                                                                                                             | 254994_at   | 1.8 |
| CLV1 receptor kinase like protein CLAVATA1 receptor kinase, Arabidopsis th., PATX:G2160756                                                             | 254515_at   | 1.8 |
| putative protein tripeptidyl-peptidase II, Homo sapiens, Pir:S54376                                                                                    | 254433_at   | 1.8 |
| receptor-like serine/threonine protein kinase ARK3                                                                                                     | 254416_at   | 1.8 |
| PRH26 protein ;supported by full-length cDNA: Ceres:36866.                                                                                             | 254343_at   | 1.8 |
| Expressed protein ; supported by full-length cDNA: Ceres: 20948.                                                                                       | 254278_at   | 1.8 |
| pumilio-like protein abdominal segment formation protein pumilio - fruitfly, PIR2:A46221; supported by cDNA: gi_13430771_gb_AF360298.1_AF360           | 254045_at   | 1.8 |
| protein kinase - like protein ADK1 protein kinase, Arabidopsis thaliana, PIR2:A55661                                                                   | 253764_s_at | 1.8 |
| AIM1 protein ; supported by cDNA: gi_16648890_gb_AY059815.1_                                                                                           | 253759_at   | 1.8 |
| signal recognition particle receptor-like protein signal recognition particle receptor - Homo sapiens,PIR2:A29440                                      | 253625_at   | 1.8 |
| putative protein probable transcription regulator protein - Sorghum bicolor,PIR2:T03446;supported by full-length cDNA: Ceres:34151.                    | 252323_at   | 1.8 |
| dehydrin-like protein dehydrin Xero2 - Arabidopsis thaliana, EMBL:U19536                                                                               | 252137_at   | 1.8 |
| putative protein various predicted proteins, Arabidopsis thaliana;supported by full-length cDNA: Ceres:4829.                                           | 252023_at   | 1.8 |
| pasticino 1 ; supported by cDNA: gi_15810452_gb_AY056265.1_                                                                                            | 251932_at   | 1.8 |
| RING finger - like protein DNA-binding Mel-18 protein, Homo sapiens, PIR:JN0717supported by full-length cDNA: Ceres:20931.                             | 251897_at   | 1.8 |
| ABC transporter-like protein putative multi resistance protein mrp - Arabidopsis thaliana, EMBL:ATMRPPROT                                              | 251503_at   | 1.8 |
| putative protein                                                                                                                                       | 250960_at   | 1.8 |
| low density lipoprotein B-like protein                                                                                                                 | 250112_at   | 1.8 |
| unknown protein ; supported by cDNA: gi_15912298_gb_AY056427.1_                                                                                        | 249886_at   | 1.8 |
| ankyrin repeat protein EMB506 ; supported by cDNA: gi_5911311_gb_AF026167.1_AF026167                                                                   | 249404_at   | 1.8 |
| disease resistance protein-like                                                                                                                        | 248848_at   | 1.8 |
| putative protein contains similarity to unknown protein (gb)AAF56975.1)                                                                                | 248458_at   | 1.8 |
| heat shock protein (emb)CAA72514.1)                                                                                                                    | 248043_s_at | 1.8 |
| unknown protein ;supported by full-length cDNA: Ceres:21044.                                                                                           | 247990_at   | 1.8 |
| beta-galactosidase (emb CAB64746.1)                                                                                                                    | 247348_at   | 1.8 |
| putative protein similar to unknown protein (sp)P55606); supported by cDNA: gi_14190422_gb_AF378889.1_AF378889                                         | 247077_at   | 1.8 |
| putative protein protein At2g40060 - Arabidopsis thaliana, EMBL:AF002109;supported by full-length cDNA: Ceres:93427.                                   | 246305_at   | 1.8 |
| putative protein                                                                                                                                       | 246247_at   | 1.8 |
| aminopeptidase-like protein ; supported by cDNA: gi_13430673_gb_AF360249.1_AF360249                                                                    | 246219_at   | 1.8 |
| TINY-like protein ; supported by cDNA: gi_16323158_gb_AY057683.1_                                                                                      | 246222_at   | 1.8 |
| polyubiquitin (UBQ4) identical to GI:17677                                                                                                             | 245989_s_at | 1.8 |
| hypothetical protein                                                                                                                                   | 245482_at   | 1.8 |
| disease resistance RPP5 like protein                                                                                                                   | 245451_at   | 1.8 |
| putative protein                                                                                                                                       | 245427_at   | 1.8 |
| ATPase alpha subunit                                                                                                                                   | 245024_at   | 1.8 |
| ribosomal protein S11                                                                                                                                  | 244979_at   | 1.8 |
| putative cytochrome P450                                                                                                                               | 267567_at   | 1.7 |
| cinnamate-4-hydroxylase molecular marker C4H (GB:U71080); supported by cDNA: gi_1773288_gb_U71081.1_ATU71081                                           | 267470_at   | 1.7 |
| putative beta-1,3-glucanase                                                                                                                            | 267335_s_at | 1.7 |
| similar to late embryogenesis abundant proteins ; supported by full-length cDNA: Ceres: 2450.                                                          | 267212_at   | 1.7 |
| putative cytochrome P450                                                                                                                               | 266995_at   | 1.7 |
| unknown protein                                                                                                                                        | 266757_at   | 1.7 |
| putative arginine N-methyltransferase                                                                                                                  | 266687_at   | 1.7 |
| hexokinase (ATHXK2) ; supported by cDNA: gi_1899024_gb_U28215.1_ATU28215                                                                               | 266702_at   | 1.7 |
| putative glutathione S-transferase ; supported by cDNA: gi_14423533_gb_AF387004.1_AF387004                                                             | 266267_at   | 1.7 |
| 20S proteasome subunit (PAA2) identical to GB:AF043519; supported by cDNA: gi_15450622_gb_AY052679.1_                                                  | 266036_s_at | 1.7 |
| unknown protein ;supported by full-length cDNA: Ceres:39669.                                                                                           | 265388_s_at | 1.7 |
| putative MYB family transcription factor ; supported by cDNA: gi_1020156_gb_U26937.1_ATU26937                                                          | 265359_at   | 1.7 |
| putative RNA-binding protein ; supported by cDNA: gi_6650522_gb_AF101056.1_AF101056                                                                    | 265266_at   | 1.7 |
| unknown protein                                                                                                                                        | 265273_at   | 1.7 |
| hypothetical protein contains similarity to zinc finger protein rts2 GB:U16133 GI:563244 from [Saccharomyces cerevisiae]; supported by cDNA: gi_13     | 265079_at   | 1.7 |
| putative protein kinase, ADK1 dual specificity kinase 1; Location of ESTs 184A2XP 3 , gb AA651408 and est 184A2T7, gb H37603, 99%+ identity w          | 265045_s_at | 1.7 |
| putative phosphoglucomutase similar to GB:AAD13031 and GB:AAC50049, location of ESTs gb W43354, gb N37499 and gb N96251; supported by                  | 264903_at   | 1.7 |
| unknown protein location of EST gb T46445                                                                                                              | 264776_at   | 1.7 |
| hypothetical protein contains similarity to nuclear protein GI:1236985 from [Homo sapiens]; supported by cDNA: gi_14423425_gb_AF386950.1_AF3:          | 264486_at   | 1.7 |
| putative beta-galactosidase                                                                                                                            | 264078_at   | 1.7 |
| putative kinesin heavy chain ; supported by cDNA: gi_14532683_gb_AY039966.1_                                                                           | 263762_at   | 1.7 |
| hypothetical protein predicted by genscan;supported by full-length cDNA: Ceres:25127.                                                                  | 263589_at   | 1.7 |



|                                                                                                                                                    |             |     |
|----------------------------------------------------------------------------------------------------------------------------------------------------|-------------|-----|
| ankyrin-like protein                                                                                                                               | 263459_at   | 1.7 |
| putative acetolactate synthase                                                                                                                     | 263460_at   | 1.7 |
| putative RING zinc finger protein                                                                                                                  | 263424_at   | 1.7 |
| unknown protein ;supported by full-length cDNA: Ceres:21223.                                                                                       | 263110_at   | 1.7 |
| NADP-isocitrate dehydrogenase, putative similar to NADP-isocitrate dehydrogenase GI:5764653 from [Citrus limon]; supported by cDNA: gi_127442      | 262962_at   | 1.7 |
| hypothetical protein similar to hin1 GB:Y07563 GI:1619320 Nicotiana tabacum;supported by full-length cDNA: Ceres:21639.                            | 262930_at   | 1.7 |
| putative heat-shock protein strong similarity to gb Z70314 heat-shock protein from Arabidopsis thaliana and is a member of the PF 00012 Hsp70 pro  | 262814_at   | 1.7 |
| amine oxidase, putative similar to amine oxidase GB:AAD49420 GI:5733089 [Canavalia lineata]                                                        | 262667_at   | 1.7 |
| putative prenyl transferase (prephytoene pyrophosphatase dehydrogenase) Except for first 55 amino acids, 52% identical to Prenyl transferase [Cya  | 262526_at   | 1.7 |
| transcription factor, putative similar to transcription factor GI:304113 from [Arabidopsis thaliana]; supported by cDNA: gi_16209662_gb_AY057596.1 | 262137_at   | 1.7 |
| receptor-like kinase, putative similar to receptor-like kinase GI:1783311 from [Brassica oleracea]                                                 | 261819_at   | 1.7 |
| hypothetical protein similar to unknown protein GI:6539269 from [Arabidopsis thaliana]                                                             | 261421_at   | 1.7 |
| starch synthase, putative similar to starch synthase GI:21613 from [Solanum tuberosum];supported by full-length cDNA: Ceres:7714.                  | 261191_at   | 1.7 |
| transcription factor scarecrow-like 14, putative similar to GB:AAD24412 from [Arabidopsis thaliana] (Plant J. 18 (1), 111-119 (1999))              | 261062_at   | 1.7 |
| hypothetical protein predicted by genemark.hmm;supported by full-length cDNA: Ceres:19486.                                                         | 260875_at   | 1.7 |
| Ring3-like bromodomain protein similar to Ring3 GB:BAA25416 GI:3041763 from [Mus musculus], contains Pfam profile:PF00439 Bromodomain              | 260787_at   | 1.7 |
| protein phosphatase 2C, putative similar to protein phosphatase 2C GI:3242077 from (Arabidopsis thaliana)                                          | 260712_at   | 1.7 |
| hypothetical protein predicted by genemark.hmm                                                                                                     | 260647_at   | 1.7 |
| glyoxalase I, putative similar to GB:Y13239 from [Brassica juncea] (Plant J. 17 (4), 385-395 (1999))                                               | 260619_at   | 1.7 |
| storage protein, putative similar to GB:CAA53781 from [Dioscorea cayenensis] (Plant Mol. Biol. 28 (3), 369-380 (1995)); supported by cDNA: gi_158  | 260626_at   | 1.7 |
| hypothetical protein contains Pfam profile: PF01965 ThiJ/PfpI family;supported by full-length cDNA: Ceres:101735.                                  | 260616_at   | 1.7 |
| unknown protein contains a region similar to uridine kinase GB:AAF09747 from [Deinococcus radiodurans]                                             | 260372_at   | 1.7 |
| putative lipase similar to monoglyceride lipase GB:NP_035974 from [Mus musculus];supported by full-length cDNA: Ceres:36954.                       | 260153_at   | 1.7 |
| ATP-dependent RNA helicase, putative similar to ATP-dependent RNA helicase [Schizosaccharomyces pombe] GI:218533; supported by cDNA: gi_           | 259597_at   | 1.7 |
| hypothetical protein ; supported by cDNA: gi_12659317_gb_AF331066.1_AF331066                                                                       | 259512_at   | 1.7 |
| putative ATPase (ISW2-like) similar to ISW2 (ATPase component of a two subunit chromatin remodeling complex) GB:6324879 [Saccharomyces ce          | 258904_at   | 1.7 |
| putative 2,3-bisphosphoglycerate-independent phosphoglycerate mutase similar to 2,3-bisphosphoglycerate-independent phosphoglycerate mutase        | 258679_at   | 1.7 |
| putative WD-repeat protein contains Pfam profile: PF00400 WD domain, G-beta repeat (7 copies)                                                      | 258268_at   | 1.7 |
| unknown protein similar to MRP-like ABC transporter GB:AAC49791 from [Arabidopsis thaliana]                                                        | 258033_at   | 1.7 |
| hypothetical protein predicted by genemark; supported by cDNA: gi_15450957_gb_AY054559.1_                                                          | 258027_at   | 1.7 |
| dihydroliipoamide dehydrogenase, putative similar to dihydroliipoamide dehydrogenase GB:CAA88451 [Synechocystis PCC6803] (Microbiology 143 i       | 257895_at   | 1.7 |
| monodehydroascorbate reductase similar to cytosolic monodehydroascorbate reductase GB:BAA77214 [Oryza sativa]; supported by cDNA: gi_1453.         | 257227_at   | 1.7 |
| hypothetical protein                                                                                                                               | 257181_at   | 1.7 |
| ubiquitin-specific protease 14 (UBP14), putative similar to ubiquitin-specific protease 14 GI:11993473 [Arabidopsis thaliana]                      | 257085_at   | 1.7 |
| metalloprotease, putative similar to metalloprotease 1 GB:AAC67244 from [Homo sapiens]                                                             | 257033_at   | 1.7 |
| hypothetical protein predicted by genemark.hmm                                                                                                     | 256596_at   | 1.7 |
| cytosolic IMP-GMP specific 5 -nucleotidase, putative similar to GI:2668557 from [Bos taurus]                                                       | 256504_at   | 1.7 |
| NADPH oxidoreductase, putative similar to GI:1708420 from [Arabidopsis thaliana] (J. Biol. Chem. 270 (44), 26224-26231 (1995));supported by full-  | 256454_at   | 1.7 |
| DNA polymerase A family protein, putative contains Pfam profile: PF00476: DNA polymerase family A                                                  | 256204_at   | 1.7 |
| amino acid permease I identical to amino acid permease I GI:22641 from [Arabidopsis thaliana]; supported by cDNA: gi_404018_gb_L16240.1_ATH,       | 256022_at   | 1.7 |
| hypothetical protein                                                                                                                               | 255723_at   | 1.7 |
| putative chalcone synthase similar to plant chalcone and stilbene synthases;supported by full-length cDNA: Ceres:21877.                            | 255703_at   | 1.7 |
| polycomb group - like protein similar to A. thaliana homeotic protein curlyleaf, GenBank accession number Y10580; supported by cDNA: gi_418550f    | 255510_at   | 1.7 |
| coded for by A. thaliana cDNA T75804 similar to ATPases associated with various cellular activities (Pfam: AAA.hmm, score: 230.91)                 | 255474_at   | 1.7 |
| predicted protein of unknown function similar to P. falciparum O1 protein, GenBank accession number AF030694                                       | 255495_at   | 1.7 |
| putative protein similar to plant nucleic acid-binding proteins;supported by full-length cDNA: Ceres:6568.                                         | 255496_at   | 1.7 |
| putative protein several hypothetical proteins - Arabidopsis thaliana                                                                              | 254872_at   | 1.7 |
| vacuolar sorting receptor-like protein BP-80 vacuolar sorting receptor, Pisum sativum, PATCHX:G1737222                                             | 254500_at   | 1.7 |
| putative serine/threonine kinase MAP3K delta-1 protein kinase, Arabidopsis thaliana,PID:g2253010; supported by cDNA: gi_15810436_gb_AY0562:        | 254269_at   | 1.7 |
| FtsH protease, putative contains similarity to zinc dependent protease GI:7650138 from [Arabidopsis thaliana]                                      | 254181_at   | 1.7 |
| serine/threonine kinase-like protein serine/threonine kinase - Sorghum bicolor,PID:e1184911; supported by cDNA: gi_14532685_gb_AY039967.1_         | 254167_at   | 1.7 |
| putative protein pmt2 methyltransferase - Schizosaccharomyces pombe,PID:e1362538                                                                   | 254079_at   | 1.7 |
| proton pump interactor non-consensus GA donor splice site at exon 5                                                                                | 253868_at   | 1.7 |
| putative protein tetratricopeptide repeat protein - Homo sapiens,PID:g1688074;supported by full-length cDNA: Ceres:12573.                          | 253633_at   | 1.7 |
| cinnamyl alcohol dehydrogenase - like protein cinnamyl alcohol dehydrogenase, Populus deltoides, PATCHX:G288753; supported by cDNA: gi_143         | 253277_at   | 1.7 |
| putative protein ; supported by cDNA: gi_13605658_gb_AF361810.1_AF361810                                                                           | 252856_at   | 1.7 |
| glucosyltransferase-like protein UDP-glucose glucosyltransferase - Arabidopsis thaliana, EMBL:AB016819;supported by full-length cDNA: Ceres:12i    | 252482_at   | 1.7 |
| disease resistance protein RPP13-like protein disease resistance protein RPP8 - Arabidopsis thaliana, EMBL:AF089710; supported by cDNA: gi_14      | 252485_at   | 1.7 |
| putative protein various predicted proteins, Arabidopsis thaliana                                                                                  | 252392_s_at | 1.7 |
| MAP kinase ; supported by cDNA: gi_14194094_gb_AF367253.1_AF367253                                                                                 | 252079_at   | 1.7 |
| alpha-galactosidase-like protein alpha galactosidase - Phaseolus vulgaris, PIR:T10860                                                              | 251729_at   | 1.7 |
| putative protein strictosidine synthase (EC 4.3.3.2) - Rauvolfia mannii (fragment);supported by full-length cDNA: Ceres:98698.                     | 251658_at   | 1.7 |
| CaLB protein                                                                                                                                       | 251351_s_at | 1.7 |
| putative protein several hypothetical proteins - Arabidopsis thaliana                                                                              | 251211_s_at | 1.7 |
| neoxanthin cleavage enzyme nc1                                                                                                                     | 251146_at   | 1.7 |
| putative protein similar to unknown protein (sp P36540)                                                                                            | 250726_at   | 1.7 |
| pyruvate kinase                                                                                                                                    | 250526_at   | 1.7 |
| putative protein                                                                                                                                   | 250380_at   | 1.7 |
| protein kinase MSK-3 - like protein kinase MSK-3, A.medicago, PIR:S37642                                                                           | 250141_at   | 1.7 |
| putative protein contains similarity to unknown protein (emb CAB89315.1); supported by cDNA: gi_15451067_gb_AY054614.1_                            | 249863_at   | 1.7 |
| putative protein DNA DAMAGE-RESPONSIVE PROTEIN 48, Saccharomyces cerevisiae, EMBL:SCDDR48A; supported by cDNA: gi_16604363_gb                      | 249416_at   | 1.7 |
| putative protein GTP-binding proteins - different species                                                                                          | 249434_at   | 1.7 |
| putative protein strong similarity to unknown protein (pir T05325); supported by cDNA: gi_13605502_gb_AF361577.1_AF361577                          | 249011_at   | 1.7 |
| putative protein contains similarity to cyclin                                                                                                     | 248988_at   | 1.7 |
| putative protein similar to unknown protein (sp P74035); supported by cDNA: gi_15292692_gb_AY050780.1_                                             | 248906_at   | 1.7 |
| DnaJ protein-like ;supported by full-length cDNA: Ceres:14006.                                                                                     | 248739_at   | 1.7 |
| mitotic checkpoint protein-like                                                                                                                    | 248579_at   | 1.7 |
| putative protein similar to unknown protein (pir  T09559); supported by cDNA: gi_15810212_gb_AY056121.1_                                           | 248310_at   | 1.7 |
| PP2A regulatory subunit ;supported by full-length cDNA: Ceres:19116.                                                                               | 248300_at   | 1.7 |
| putative protein similar to unknown protein (pir  T05643)                                                                                          | 248065_at   | 1.7 |
| putative protein                                                                                                                                   | 247629_at   | 1.7 |
| RNA helicase ; supported by cDNA: gi_14517481_gb_AY039576.1_                                                                                       | 247465_at   | 1.7 |
| protein kinase ; supported by cDNA: gi_16974578_gb_AY060555.1_                                                                                     | 247384_at   | 1.7 |
| G protein-coupled receptor-like protein ; supported by cDNA: gi_15451139_gb_AY054650.1_                                                            | 247175_at   | 1.7 |
| putative protein Leaf protein, Pharbitis nil, EMBL:D85101                                                                                          | 246901_at   | 1.7 |
| epsilon-adaptin, putative similar to epsilon-adaptin GI:5689377 from [Homo sapiens]                                                                | 246634_at   | 1.7 |
| PPR-repeat protein, putative contains multiple PPR domains: PF01535: PPR repeat                                                                    | 246313_at   | 1.7 |

|                                                                                                                                                         |             |     |
|---------------------------------------------------------------------------------------------------------------------------------------------------------|-------------|-----|
| putative protein predicted proteins, Arabidopsis thaliana and others                                                                                    | 246180_at   | 1.7 |
| luminal binding protein ; supported by cDNA: gi_1303694_dbj_D84414.1_ATHBIPA                                                                            | 245956_s_at | 1.7 |
| sucrose-phosphate synthase -like protein sucrose-phosphate synthase isoform 1, Citrus unshiu, PIR:S72648                                                | 245904_at   | 1.7 |
| allergen like protein                                                                                                                                   | 245463_at   | 1.7 |
| putative protein disulfide-isomerase                                                                                                                    | 245175_at   | 1.7 |
| unknown protein                                                                                                                                         | 245054_at   | 1.7 |
| cytochrome b6-f complex, subunit V                                                                                                                      | 244966_at   | 1.7 |
| putative protein strong similarity to unknown protein (gb AAF16763.1)                                                                                   | 249086_at   | 1.6 |
| putative protein various predicted proteins, Arabidopsis thaliana                                                                                       | 246899_at   | 1.6 |
| photomorphogenesis repressor (COP1) identical to GB:L24437; supported by cDNA: gi_402684_gb_L24437.1_ATHCOP1A                                           | 267640_at   | 1.6 |
| unknown protein ; supported by full-length cDNA: Ceres:36855.                                                                                           | 267503_at   | 1.6 |
| putative U5 small nuclear ribonucleoprotein, an RNA helicase                                                                                            | 267454_at   | 1.6 |
| putative potassium transporter                                                                                                                          | 267423_at   | 1.6 |
| Expressed protein ; supported by cDNA: gi_14334701_gb_AY035024.1_                                                                                       | 266802_at   | 1.6 |
| putative squamosa-promoter binding protein                                                                                                              | 266748_at   | 1.6 |
| unknown protein                                                                                                                                         | 266628_at   | 1.6 |
| putative phospholipid cytidyltransferase                                                                                                                | 266359_at   | 1.6 |
| putative pumilio/Mpt5 family RNA-binding protein                                                                                                        | 266288_s_at | 1.6 |
| unknown protein ;supported by full-length cDNA: Ceres:39558.                                                                                            | 266170_at   | 1.6 |
| putative calmodulin-binding protein ; supported by cDNA: gi_15983494_gb_AF424622.1_AF424622                                                             | 266019_at   | 1.6 |
| putative prolylcarboxypeptidase                                                                                                                         | 265990_at   | 1.6 |
| unknown protein ;supported by full-length cDNA: Ceres:98881.                                                                                            | 265959_at   | 1.6 |
| similar to flavin-binding monooxygenase (Z71258); similar to ESTs gb R30018, gb T23015, and gb T88100 contains similarity to flavin-containing mc       | 265108_s_at | 1.6 |
| unknown protein                                                                                                                                         | 264563_s_at | 1.6 |
| hypothetical protein predicted by genemark.hmm                                                                                                          | 264472_at   | 1.6 |
| hypothetical protein Contains similarity to transcription initiation factor IIE, alpha subunit gb X63468 from Homo sapiens; supported by cDNA: gi_158   | 264368_at   | 1.6 |
| putative homeodomain transcription factor ; supported by cDNA: gi_13877516_gb_AF353094.1_AF353094                                                       | 263956_at   | 1.6 |
| enolase (2-phospho-D-glycerate hydroxylase) ; supported by cDNA: gi_15809969_gb_AY054253.1_                                                             | 263924_at   | 1.6 |
| phosphoenolpyruvate carboxylase                                                                                                                         | 263491_at   | 1.6 |
| RSH3 (RelA/SpoT homolog) identical to RSH3 (RelA/SpoT homolog) GI:7141308 from [Arabidopsis thaliana]; supported by cDNA: gi_7141307_gb_/               | 263159_at   | 1.6 |
| dynammin, putative similar to dynamin-1 SP:P21575 [Rattus norvegicus (Rat)];supported by full-length cDNA: Ceres:12880.                                 | 262837_at   | 1.6 |
| hypothetical protein predicted by genscan                                                                                                               | 262766_at   | 1.6 |
| putative cytochrome P450 monooxygenase strong similarity to gb X97864 cytochrome P450 from Arabidopsis thaliana and is a member of the PF 0             | 262780_at   | 1.6 |
| putative cytochrome P450 similar to gb AF069494 cytochrome P450 from Sinapis alba and is a member of the PF 00067 Cytochrome P450 family. E 262717_s_at | 262717_s_at | 1.6 |
| putative pattern formation protein EMB30 highly similar to GB:Q42510; supported by cDNA: gi_1209630_gb_U36432.1_ATU36432                                | 262614_at   | 1.6 |
| CCAAT-binding factor B subunit homolog, putative similar to CCAAT-binding factor B subunit homolog GI:1173615 from (Brassica napus); supporte           | 262378_at   | 1.6 |
| hypothetical protein similar to putative disease resistance protein GB:CAB40943 GI:4586107 from [Arabidopsis thaliana]                                  | 262326_at   | 1.6 |
| unknown protein identical to unknown protein GB:AAD55492 (Arabidopsis thaliana)                                                                         | 262289_at   | 1.6 |
| hypothetical protein predicted by genemark.hmm                                                                                                          | 262238_at   | 1.6 |
| unknown protein ; supported by cDNA: gi_15215759_gb_AY050409.1_                                                                                         | 261863_at   | 1.6 |
| phosphoethanolamine N-methyltransferase, putative similar to GB:AAF61950 from [Spinacia oleracea]; supported by cDNA: gi_16226648_gb_AF42               | 261309_at   | 1.6 |
| hypothetical protein predicted by genemark.hmm;supported by full-length cDNA: Ceres:98874.                                                              | 261124_at   | 1.6 |
| unknown protein                                                                                                                                         | 261112_at   | 1.6 |
| homeodomain protein BELL1, putative similar to GB:AAB05099 from [Arabidopsis thaliana] (Cell 83 (5), 735-742 (1995));supported by full-length cD        | 261120_at   | 1.6 |
| hypothetical protein predicted by genemark.hmm                                                                                                          | 260922_at   | 1.6 |
| unknown protein ;supported by full-length cDNA: Ceres:21241.                                                                                            | 260868_at   | 1.6 |
| putative urease similar to urease GB:225714 [Canavalia ensiformis]                                                                                      | 260189_at   | 1.6 |
| NAM-like protein similar to NAM (no apical meristem) GB:CAA63101 from [Petunia x hybrida]                                                               | 260203_at   | 1.6 |
| putative trehalose-6-phosphate synthase similar to trehalose-6-phosphate synthase GB:CAA69879 [Arabidopsis thaliana]; supported by cDNA: gi_1f          | 260010_at   | 1.6 |
| unknown protein ;supported by full-length cDNA: Ceres:19761.                                                                                            | 259895_at   | 1.6 |
| Expressed protein ; supported by full-length cDNA: Ceres: 30602.                                                                                        | 259789_at   | 1.6 |
| GRAB1-like protein similar to GRAB1 protein GB:CAA09371, a novel member of the NAC domain family;supported by full-length cDNA: Ceres:3647              | 259705_at   | 1.6 |
| unknown protein ; supported by cDNA: gi_15028084_gb_AY045899.1_                                                                                         | 259230_at   | 1.6 |
| unknown protein similar to possible apospory-associated protein C GB:Q40784 [Pennisetum ciliare];supported by full-length cDNA: Ceres:41354.            | 259186_at   | 1.6 |
| digalactosylacylglycerol synthase identical to digalactosylacylglycerol synthase GB:AAD42378 [Arabidopsis thaliana]; supported by cDNA: gi_53f          | 259070_at   | 1.6 |
| putative MAP3K epsilon protein kinase similar to MAP3K epsilon protein kinase GB:CAA12272 [Arabidopsis thaliana], GB:CAB54520 [Brassica napu            | 258632_s_at | 1.6 |
| unknown protein                                                                                                                                         | 258362_at   | 1.6 |
| kinesin-like protein similar to kinesin heavy chain member 2 GB:NP_032468 from [Mus musculus]; supported by cDNA: gi_15450500_gb_AY052352               | 258286_at   | 1.6 |
| hypothetical protein predicted by genefinder;supported by full-length cDNA: Ceres:116381.                                                               | 257855_at   | 1.6 |
| unknown protein                                                                                                                                         | 257084_at   | 1.6 |
| Expressed protein ; supported by cDNA: gi_15215805_gb_AY050432.1_                                                                                       | 257007_at   | 1.6 |
| UDP-glucose dehydrogenase, putative UDP-glucose 6-dehydrogenase (UDPGDH) GB:Q96558 from [Glycine max];supported by full-length cDNA: C                  | 256745_at   | 1.6 |
| Eukaryotic translation initiation factor 5, putative Eukaryotic translation initiation factor 5 [Zea mays] GI:4160402; supported by cDNA: gi_15810338_  | 256502_at   | 1.6 |
| unknown protein                                                                                                                                         | 256451_s_at | 1.6 |
| unknown protein ;supported by full-length cDNA: Ceres:33407.                                                                                            | 256440_at   | 1.6 |
| guanine nucleotide regulatory protein, putative similar to guanine nucleotide regulatory protein GI:3461880 from [Mus musculus]                         | 256119_at   | 1.6 |
| putative myb-related DNA-binding protein                                                                                                                | 255614_at   | 1.6 |
| hypothetical protein                                                                                                                                    | 255588_at   | 1.6 |
| putative protein LEA protein , Cicer arietinum, AJ224518                                                                                                | 254716_at   | 1.6 |
| putative protein (fragment) ATP(GTP)-binding protein, Homo sapiens, AJ010842;supported by full-length cDNA: Ceres:6952.                                 | 254375_at   | 1.6 |
| potassium channel protein AKT3 ; supported by cDNA: gi_1100897_gb_U40154.1_ATU40154                                                                     | 254305_at   | 1.6 |
| nucleosome assembly protein I-like protein ; supported by cDNA: gi_15450807_gb_AY054484.1_                                                              | 253996_at   | 1.6 |
| pyrophosphate-dependent phosphofructo-1-kinase pyrophosphate-dependent phosphofructo-1-kinase, Prunus armeniaca, U93272; supported by cD                | 253987_at   | 1.6 |
| 26S proteasome subunit 4-like protein Drosophila melanogaster 26S proteasome subunit 4 ATPase, PID:g1066065; supported by cDNA: gi_143346               | 253755_at   | 1.6 |
| putative protein hypothetical protein T29E15.27 - Arabidopsis thaliana,PID:g3738334                                                                     | 253586_s_at | 1.6 |
| putative protein ; supported by cDNA: gi_14334555_gb_AY035182.1_                                                                                        | 253424_at   | 1.6 |
| Expressed protein ; supported by cDNA: gi_13358221_gb_AF325032.2_AF325032                                                                               | 253293_at   | 1.6 |
| putative aldehyde dehydrogenase aldehyde dehydrogenase (NAD+), Rattus norvegicus, PIR2:A41028; supported by cDNA: gi_15451105_gb_AY05                   | 253237_at   | 1.6 |
| MYB-like protein myb-related protein Y49, Arabidopsis thaliana, PIR:S58292                                                                              | 253219_at   | 1.6 |
| dnaJ-like protein CAJ1 protein, Saccharomyces cerevisiae, PIR2:S48085                                                                                   | 252935_at   | 1.6 |
| putative protein Human (H326) translated mRNA - Homo sapiens, EMBL:HS06631                                                                              | 252587_at   | 1.6 |
| putative protein predicted proteins, Arabidopsis thaliana; supported by cDNA: gi_14532663_gb_AY039956.1_                                                | 252467_at   | 1.6 |
| putative protein putative hydrolyse - Arabidopsis thaliana, PID:g4191785                                                                                | 252423_at   | 1.6 |
| putative protein activating signal cointegrator 1 - Homo sapiens, EMBL:AF168418; supported by full-length cDNA: Ceres:13265.                            | 252424_at   | 1.6 |
| putative protein KIAA0226 gene product - Homo sapiens,PID:d1013904; supported by cDNA: gi_14532611_gb_AY039930.1_                                       | 252353_at   | 1.6 |
| peroxidase ; supported by full-length cDNA: Ceres:39678.                                                                                                | 252291_s_at | 1.6 |
| vacuolar sorting protein 35 homolog vacuolar sorting protein 35 - Homo sapiens, EMBL:AF191298                                                           | 252150_at   | 1.6 |

|                                                                                                                                                           |             |     |
|-----------------------------------------------------------------------------------------------------------------------------------------------------------|-------------|-----|
| beta-ketoacyl-ACP reductase - like protein beta-ketoacyl-ACP reductase, <i>Cuphea lanceolata</i> , EMBL:X64566                                            | 251780_s_at | 1.6 |
| PROBABLE EUKARYOTIC TRANSLATION INITIATION FACTOR 3 SUBUNIT 8 ; supported by cDNA: gi_2789659_gb_AF040102.1_AF040102                                      | 251738_at   | 1.6 |
| putative protein DOC4, <i>Mus musculus</i> , AF059485                                                                                                     | 251594_at   | 1.6 |
| putative protein putative protein BcDNA.GH03694 - <i>Drosophila melanogaster</i> , EMBL:AF181626                                                          | 251316_s_at | 1.6 |
| tubulin gamma-1 chain                                                                                                                                     | 251331_s_at | 1.6 |
| putative protein predicted protein, <i>Arabidopsis thaliana</i>                                                                                           | 251145_at   | 1.6 |
| ankyrin - like protein ankyrin G119, <i>Homo sapiens</i> , EMBL:HSU43965                                                                                  | 250998_at   | 1.6 |
| glucuronosyl transferase-like protein                                                                                                                     | 250750_at   | 1.6 |
| elongation factor 1B alpha-subunit (emb)CAB64729.1)                                                                                                       | 250304_at   | 1.6 |
| ABA-responsive protein - like ABA-responsive protein, <i>Hordeum vulgare</i> , EMBL:AF026538                                                              | 250279_at   | 1.6 |
| chaperonin 60 alpha chain - like protein chaperonin 60 alpha chain precursor, garden pea, PIR:T06518                                                      | 249977_at   | 1.6 |
| squamosa promoter binding protein-like 7 ; supported by cDNA: gi_13605911_gb_AF367355.1_AF367355                                                          | 249960_at   | 1.6 |
| putative protein predicted protein, <i>Drosophila melanogaster</i>                                                                                        | 249528_at   | 1.6 |
| putative protein contains similarity to CONSTANS homologs                                                                                                 | 248744_at   | 1.6 |
| putative protein similar to unknown protein (gb)AAD20092.1)                                                                                               | 248668_at   | 1.6 |
| putative protein similar to unknown protein (ref)NP_014050.1)                                                                                             | 248308_at   | 1.6 |
| putative protein similar to unknown protein (pir  T02891);supported by full-length cDNA: Ceres:112574.                                                    | 248271_at   | 1.6 |
| E2, ubiquitin-conjugating enzyme, putative ;supported by full-length cDNA: Ceres:10022.                                                                   | 247999_at   | 1.6 |
| phosphatidylserine decarboxylase                                                                                                                          | 247940_at   | 1.6 |
| GTP binding protein-like                                                                                                                                  | 247891_at   | 1.6 |
| ubiquitin-specific protease 23 (UBP23), putative similar to GI:11993486; supported by cDNA: gi_11993485_gb_AF302671.1_AF302671                            | 247838_at   | 1.6 |
| 1-aminocyclopropane-1-carboxylate oxidase - like protein 1-aminocyclopropane-1-carboxylate oxidase kidney bean, PIR:T10818; supported by cDN              | 247679_at   | 1.6 |
| putative protein gcpE protein, <i>Chlamydia muridarum</i> , PIR:C81715                                                                                    | 247637_at   | 1.6 |
| putative protein Atu, <i>Drosophila melanogaster</i> , EMBL:DMU75467                                                                                      | 247565_at   | 1.6 |
| peroxisomal Ca-dependent solute carrier - like protein peroxisomal Ca-dependent solute carrier, <i>Oryctolagus cuniculus</i> , EMBL:AF004161; supporte    | 247498_at   | 1.6 |
| putative protein predicted protein, <i>Arabidopsis thaliana</i> ; supported by cDNA: gi_13899116_gb_AF370553.1_AF370553                                   | 247507_at   | 1.6 |
| putative protein similar to unknown protein (pir  T01257)                                                                                                 | 247386_at   | 1.6 |
| ABC transporter-like                                                                                                                                      | 247232_at   | 1.6 |
| annexin ;supported by full-length cDNA: Ceres:1728.                                                                                                       | 247210_at   | 1.6 |
| NifS-like aminotransferase ; supported by cDNA: gi_15292880_gb_AY050874.1_                                                                                | 247164_at   | 1.6 |
| zeaxanthin epoxidase precursor ; supported by cDNA: gi_10444087_gb_AF281655.1_AF281655                                                                    | 247025_at   | 1.6 |
| putative protein UBIQUINONE BIOSYNTHESIS PROTEIN AARF - <i>Providencia stuartii</i> , EMBL:AF002165(N-terminus) and to Esterase STE1 - <i>Metar</i>       | 246976_s_at | 1.6 |
| protein phosphatase - like protein phosphatase-2C, <i>Mesembryanthemum crystallinum</i> , EMBL:AF075581;supported by full-length cDNA: Ceres:2334         | 246756_at   | 1.6 |
| hypothetical protein ; supported by cDNA: gi_13605878_gb_AF367338.1_AF367338                                                                              | 246633_at   | 1.6 |
| quinone oxidoreductase -like protein probable quinone oxidoreductase (EC 1.6.5.5) P1, <i>Arabidopsis thaliana</i> , PIR:S57611                            | 246464_at   | 1.6 |
| unknown protein                                                                                                                                           | 246286_at   | 1.6 |
| Expressed protein ; supported by full-length cDNA: Ceres: 59.                                                                                             | 246125_at   | 1.6 |
| 24 kDa vacuolar protein - like 24 kDa vacuolar protein VP24, <i>Ipomoea batatas</i> , EMBL:AB025531                                                       | 245991_at   | 1.6 |
| putative protein HCNP, <i>Homo sapiens</i> , EMBL:AF226051                                                                                                | 245917_at   | 1.6 |
| hypothetical protein contains similarity to arginine metabolism regulation protein i GI:695715 from [ <i>Saccharomyces cerevisiae</i> ]                   | 245872_at   | 1.6 |
| hypothetical protein ; supported by cDNA: gi_15451217_gb_AY054689.1_                                                                                      | 245298_at   | 1.6 |
| putative protein similarity to proteins of unknown function from human and mouse                                                                          | 245180_at   | 1.6 |
| calcium-dependent protein kinase-like protein strong similarity to calcium-dependent protein kinase 19, <i>Arabidopsis thaliana</i> , PIR:S71778~Contains | 245156_at   | 1.6 |
| NADH dehydrogenase subunit 9                                                                                                                              | 244943_at   | 1.6 |
| hypothetical protein predicted by genscan                                                                                                                 | 257444_at   | 1.6 |
| putative beta-glucosidase                                                                                                                                 | 267645_at   | 1.5 |
| putative translation initiation factor eIF-2B epsilon subunit                                                                                             | 267415_at   | 1.5 |
| putative vacuolar sorting receptor identical to GB:U79960; contains a calcium-binding EGF-like domain signature                                           | 267106_s_at | 1.5 |
| hypothetical protein predicted by genscan                                                                                                                 | 266962_at   | 1.5 |
| putative NADH dehydrogenase (ubiquinone oxidoreductase)                                                                                                   | 266835_at   | 1.5 |
| putative amino acid acetyltransferase                                                                                                                     | 266826_at   | 1.5 |
| putative cytochrome P450                                                                                                                                  | 266778_at   | 1.5 |
| MYB-related transcription factor (CCA1)                                                                                                                   | 266719_at   | 1.5 |
| unknown protein                                                                                                                                           | 266362_at   | 1.5 |
| putative tropinone reductase ;supported by full-length cDNA: Ceres:14555.                                                                                 | 266292_at   | 1.5 |
| putative membrane channel protein ;supported by full-length cDNA: Ceres:10159.                                                                            | 266225_at   | 1.5 |
| putative retroelement pol polyprotein                                                                                                                     | 266187_at   | 1.5 |
| putative vacuolar protein sorting-associated protein ; supported by cDNA: gi_15081710_gb_AY048248.1_                                                      | 266096_at   | 1.5 |
| putative alpha-carboxyltransferase ; supported by cDNA: gi_6851090_gb_AF056969.1_AF056969                                                                 | 266099_at   | 1.5 |
| unknown protein                                                                                                                                           | 265974_at   | 1.5 |
| unknown protein                                                                                                                                           | 265900_at   | 1.5 |
| unknown protein                                                                                                                                           | 265706_at   | 1.5 |
| putative WRKY DNA-binding protein ; supported by cDNA: gi_13506736_gb_AF224701.1_AF224701                                                                 | 265718_at   | 1.5 |
| putative chloroplast outer membrane protein                                                                                                               | 265412_at   | 1.5 |
| putative RNA methyltransferase                                                                                                                            | 265274_at   | 1.5 |
| UDP-N-acetylglucosamine pyrophosphorylase-like protein similar to sperm associated antigen 2, GB:4507759 from [ <i>Homo sapiens</i> ], similar to ESTs    | 265103_at   | 1.5 |
| G-box binding factor, GBF4 Identical to <i>Arabidopsis thaliana</i> G-box-binding factor 4, gb U01823;supported by full-length cDNA: Ceres:36980.         | 265040_at   | 1.5 |
| putative 26S protease regulatory subunit 6A Similar to probable Mg-dependent ATPase (pir S56671). ESTs gb T46782.gb AA04798 come from this                | 264657_at   | 1.5 |
| putative glutathione S-transferase TSI-1 similar to glutathione S-transferase TSI-1 (gi 2190992); similar to ESTs gb R29860, emb Z29757, and emb          | 264436_at   | 1.5 |
| unknown protein ESTs gb H36966, gb R65511, gb T42324 and gb T20569 come from this gene                                                                    | 264362_at   | 1.5 |
| unknown protein Contains similarity to gb Z69902 from <i>C. elegans</i>                                                                                   | 264321_at   | 1.5 |
| hypothetical protein similar to hypothetical protein GI:7378617 from [ <i>Arabidopsis thaliana</i> ]                                                      | 264310_at   | 1.5 |
| unknown protein contains similarity to tryparedoxin GI:3851498 from [ <i>Crithidia fasciculata</i> ];supported by full-length cDNA: Ceres:34936.          | 264219_at   | 1.5 |
| hypothetical protein predicted by genscan and genefinder;supported by full-length cDNA: Ceres:17483.                                                      | 264111_at   | 1.5 |
| putative citrate synthase ;supported by full-length cDNA: Ceres:17416.                                                                                    | 263986_at   | 1.5 |
| putative GDSL-motif lipase/hydrolase similar to APG proteins; pFAM domain PF00657;supported by full-length cDNA: Ceres:39762.                             | 263809_at   | 1.5 |
| putative photomorphogenesis repressor protein                                                                                                             | 263779_at   | 1.5 |
| DNA-directed RNA polymerase II, third largest subunit                                                                                                     | 263564_s_at | 1.5 |
| putative heat shock protein ; supported by cDNA: gi_15450722_gb_AY053403.1_                                                                               | 263483_at   | 1.5 |
| putative protein kinase contains a protein kinase domain profile (PDOC00100); supported by cDNA: gi_13605880_gb_AF367339.1_AF367339                       | 263274_at   | 1.5 |
| dynammin-like protein                                                                                                                                     | 263278_at   | 1.5 |
| FtsH protease, putative contains similarity to chloroplast FtsH protease GI:5804782 from [ <i>Nicotiana tabacum</i> ]                                     | 262937_at   | 1.5 |
| unknown protein ; supported by cDNA: gi_15028136_gb_AY046018.1_                                                                                           | 262881_at   | 1.5 |
| mercaptopyruvate sulfurtransferase (Mst2/Rdh2) identical to mercaptopyruvate sulfurtransferase GI:600983 and thiosulfate sulfurtransferase GI:581         | 262712_at   | 1.5 |
| hypothetical protein                                                                                                                                      | 262621_at   | 1.5 |
| putative protein disulfide isomerase precursor Similar to gb Z11499 protein disulfide isomerase from <i>Medicago sativa</i> . ESTs gb AI099693, gb R6522  | 262504_at   | 1.5 |
| unknown protein ; supported by full-length cDNA: Ceres: 39741.                                                                                            | 262204_at   | 1.5 |

|                                                                                                                                                       |             |     |
|-------------------------------------------------------------------------------------------------------------------------------------------------------|-------------|-----|
| ABC transporter protein, putative similar to ABC transporter protein GB:AAF31030 GI:6899653 from [Leishmania major]                                   | 262005_at   | 1.5 |
| vacuolar assembly protein vps41, putative similar to vacuolar assembly protein vps41 GI:1835787 from [Lycopersicon esculentum]                        | 261783_at   | 1.5 |
| hypothetical protein contains similarity to spastin protein orthologue GB:CAB60143 GI:6273572 from [Mus musculus]                                     | 261689_at   | 1.5 |
| ARP protein, putative similar to ARP protein GB:CAA89858 GI:886434 from [Arabidopsis thaliana]                                                        | 261601_at   | 1.5 |
| peroxidase ATP4a identical to GB:CAA67309 GI:1429213 from [Arabidopsis thaliana]; supported by full-length cDNA: Ceres: 39968.                        | 261518_at   | 1.5 |
| isochorismate synthase, putative similar to isochorismate synthase GI:3348077 from [Arabidopsis thaliana]                                             | 261428_at   | 1.5 |
| hypothetical protein predicted by genscan+; supported by full-length cDNA: Ceres: 107992.                                                             | 260981_at   | 1.5 |
| unknown protein                                                                                                                                       | 260862_at   | 1.5 |
| valyl-tRNA synthetase, putative similar to valyl tRNA synthetase GB:AAB49704 GI:1890130 from [Arabidopsis thaliana]; supported by cDNA: gi_189        | 260780_at   | 1.5 |
| hypothetical protein predicted by genscan+                                                                                                            | 260785_at   | 1.5 |
| RING finger protein, putative similar to GB:BAA78677 from [Homo sapiens]                                                                              | 260690_at   | 1.5 |
| hypothetical protein predicted by genemark.hmm;supported by full-length cDNA: Ceres:28026.                                                            | 260622_at   | 1.5 |
| putative pre-mRNA splicing factor RNA helicase                                                                                                        | 260525_at   | 1.5 |
| unknown protein                                                                                                                                       | 260374_at   | 1.5 |
| putative serine/threonine kinase similar to serine/threonine kinase GB:AAB68776 [Arabidopsis thaliana]; supported by cDNA: gi_2352083_gb_U9661        | 260339_at   | 1.5 |
| putative alanine aminotransferase similar to alanine aminotransferase GB:AAB01685 (Chlamydomonas reinhardtii); supported by full-length cDNA: C       | 260309_at   | 1.5 |
| unknown protein similar to unknown protein GB:AAD21437 from [Arabidopsis thaliana];supported by full-length cDNA: Ceres:31039.                        | 260259_at   | 1.5 |
| hypothetical protein similar to hypothetical protein GB:CAB37532 from [Arabidopsis thaliana], predicted by genscan+;supported by full-length cDNA:    | 260127_at   | 1.5 |
| putative nuclear matrix constituent protein 1 (NMCP1) similar to nuclear matrix constituent protein 1 (NMCP1) GB:BAA20407 [Daucus carota] (involv     | 260031_at   | 1.5 |
| RNA-binding protein MEI2, putative similar to GI:6650523 from [Arabidopsis thaliana]                                                                  | 259769_at   | 1.5 |
| sphingosine-1-phosphatase lyase, putative similar to sphingosine-1-phosphatase lyase [Homo sapiens] GI:4160532; supported by cDNA: gi_13430507_       | 259598_at   | 1.5 |
| hypothetical protein                                                                                                                                  | 259535_at   | 1.5 |
| myb-related protein, putative similar to myb-related protein GI:2505876 from [Arabidopsis thaliana]                                                   | 259432_at   | 1.5 |
| hypothetical protein contains similarity to hepatocellular carcinoma-associated antigen 59 GI:7158847 from [Homo sapiens]; supported by cDNA: gi_     | 259415_at   | 1.5 |
| putative lectin contains Pfam profile: PF01419 jacalin-like lectin domain; similar to jasmonate inducible protein GB:Y11483 (Brassica napus), myrosin | 259383_at   | 1.5 |
| unknown protein similar to hypothetical protein GB:AAC23643 [Arabidopsis thaliana]                                                                    | 259232_at   | 1.5 |
| hypothetical protein predicted by genscan                                                                                                             | 259246_s_at | 1.5 |
| unknown protein ;supported by full-length cDNA: Ceres:249634.                                                                                         | 259188_at   | 1.5 |
| unknown protein                                                                                                                                       | 259052_at   | 1.5 |
| unknown protein ; supported by cDNA: gi_15809941_gb_AY054239.1_                                                                                       | 259057_at   | 1.5 |
| unknown protein ; supported by cDNA: gi_15292900_gb_AY050884.1_                                                                                       | 258838_at   | 1.5 |
| ankyrin-like protein similar to ankyrin proteins: GB:CAA48803 [Mus musculus], GB:CAA40279 [Homo sapiens], GB:AAB47551 [Rattus norvegicus]; I          | 258794_at   | 1.5 |
| hypothetical protein similar to hypothetical protein GB:AAC17075 [Arabidopsis thaliana]; supported by cDNA: gi_15810358_gb_AY056218.1_                | 258804_at   | 1.5 |
| L-allo-threonine aldolase, putative similar to L-ALLO-THREONINE ALDOLASE GB:O07051 from [Aeromonas jandaei];supported by full-length cDN/             | 258599_at   | 1.5 |
| acetyl-coA dehydrogenase, putative similar to acetyl-coenzyme A dehydrogenase GB:NP_031408 from [Mus musculus]                                        | 258524_at   | 1.5 |
| hypothetical protein predicted by genscan+; supported by cDNA: gi_15810242_gb_AY056160.1_                                                             | 258374_at   | 1.5 |
| putative B regulatory subunit of protein phosphatase 2A similar to GB:AAB58902 from [Arabidopsis thaliana]; supported by cDNA: gi_14194122_gb_        | 258084_at   | 1.5 |
| putative 4-coumarate:CoA ligase 2 similar to GB:AAD47192 from [Arabidopsis thaliana]                                                                  | 258037_at   | 1.5 |
| unknown protein                                                                                                                                       | 258015_at   | 1.5 |
| protein phosphatase-2c, putative similar to protein phosphatase-2c GB:AAC35951 [Mesembryanthemum crystallinum]; contains Pfam profile: PF004          | 257887_at   | 1.5 |
| unknown protein                                                                                                                                       | 257719_at   | 1.5 |
| unknown protein                                                                                                                                       | 257249_at   | 1.5 |
| glutathione reductase, cytosolic identical to GB:P48641 from [Arabidopsis thaliana] (); supported by cDNA: gi_14532809_gb_AY040029.1_                 | 257252_at   | 1.5 |
| mitochondrial chaperonin hsp60 identical to mitochondrial chaperonin hsp60 GB:Z11547 [Arabidopsis thaliana] (Plant Mol. Biol. 18 (5), 873-885 (199    | 256905_at   | 1.5 |
| far-red impaired response protein, putative similar to GB:far-red impaired response protein GB:AAD51282 from [Arabidopsis thaliana] (Genes Dev. (     | 256820_at   | 1.5 |
| alpha-glucan phosphorylase, putative similar to alpha-glucan phosphorylase, L isozyme 1 precursor GB:P04045 from [Solanum tuberosum] (J. Biocl        | 256746_at   | 1.5 |
| putative protein DNA-binding protein PD2 - Pisum sativum,PID:e275185                                                                                  | 256675_at   | 1.5 |
| recombination signal sequence recognition protein, putative similar to recombination signal sequence recognition protein (SSRP1) SP:Q08943 [Mus       | 256590_at   | 1.5 |
| putative clathrin heavy chain similar to clathrin heavy chain GB:AAC49294 [Glycine max]                                                               | 256437_s_at | 1.5 |
| unknown protein ;supported by full-length cDNA: Ceres:3056.                                                                                           | 256441_at   | 1.5 |
| pinhead-like protein similar to pinhead [Arabidopsis thaliana] GI:5107374                                                                             | 256293_at   | 1.5 |
| glutathione S-conjugate transporting ATPase (AtMRP1) identical to glutathione S-conjugate transporting ATPase (AtMRP1) [Arabidopsis thaliana] GI      | 256305_at   | 1.5 |
| GTP-binding protein, putative similar to GTP-binding protein NGB [Homo sapiens] GI:4191616                                                            | 256207_at   | 1.5 |
| phosphoinositide specific phospholipase (AtPLC2) identical to phosphoinositide specific phospholipase (AtPLC2) GI:857374 [Arabidopsis thaliana]; s    | 256156_at   | 1.5 |
| unknown protein                                                                                                                                       | 256013_at   | 1.5 |
| hypothetical protein ;supported by full-length cDNA: Ceres:37204.                                                                                     | 255980_at   | 1.5 |
| hypothetical protein contains Pfam profile: PF00650 CRAL/TRIO domain                                                                                  | 255923_at   | 1.5 |
| hypothetical protein contains Pfam profile: PF00612 IQ calmodulin-binding motif                                                                       | 255783_at   | 1.5 |
| flavonol 4 -sulfotransferase, putative similar to flavonol 4 -sulfotransferase GI:168168 from [Flaveria chloraefolia]                                 | 255773_at   | 1.5 |
| 82.09 and 30.80) similar to alternative splicing factor ASF                                                                                           | 255472_at   | 1.5 |
| putative cullin-like 1 protein similar to O. sativa cullin-like proteins; supported by cDNA: gi_15028160_gb_AY046030.1_                               | 255441_at   | 1.5 |
| coded for by A. thaliana cDNA W43435 ; supported by cDNA: gi_14532463_gb_AY039856.1_                                                                  | 255259_at   | 1.5 |
| putative transcriptional regulator                                                                                                                    | 254992_at   | 1.5 |
| UDP-galactose 4-epimerase - like protein UDP-galactose 4-epimerase, Cyamopsis tetragonoloba, AJ005082;supported by full-length cDNA: Ceres:'          | 254952_at   | 1.5 |
| putative protein other hypothetical proteins - Arabidopsis thaliana                                                                                   | 254965_at   | 1.5 |
| putative translation elongation factor ts elongation factor ts (tsf) RP087 - Rickettsia prowazekii, PIR2:F71717                                       | 254932_at   | 1.5 |
| putative protein beta-transducin repeats containing protein - Homo sapiens,PID:e1284220                                                               | 254913_at   | 1.5 |
| putative SWH1 protein SWH1 protein - yeast, PIR2:S47536                                                                                               | 254817_at   | 1.5 |
| putative protein ;supported by full-length cDNA: Ceres:100165.                                                                                        | 254577_at   | 1.5 |
| putative protein cyclin C homolog 1, Schizosaccharomyces pombe, PATCHX:G2055413                                                                       | 254526_at   | 1.5 |
| trehalose-6-phosphate phosphatase - like protein trehalose-6-phosphate phosphatase (AtTPPA), PID:g2944178                                             | 254321_at   | 1.5 |
| transcriptional activator CBF1-like protein strong similarity to transcriptional activator CBF1, Arabidopsis thaliana00                               | 254066_at   | 1.5 |
| putative protein                                                                                                                                      | 253805_at   | 1.5 |
| cinnamoyl-CoA reductase - like protein cinnamoyl-CoA reductase, Saccharum officinarum, gb:AJ231134; supported by full-length cDNA: Ceres: 150         | 253638_at   | 1.5 |
| putative protein hypothetical protein - Synechocystis sp. (strain PCC 6803),PIR2:S76076                                                               | 253585_at   | 1.5 |
| putative protein bcop gene product - Drosophila melanogaster,PID:g472343                                                                              | 253528_s_at | 1.5 |
| putative protein kinase protein kinase, Spinacia oleracea, PIR2:S42867                                                                                | 253359_at   | 1.5 |
| aminopeptidase - like protein aminopeptidase, Mus musculus, U35646                                                                                    | 253360_at   | 1.5 |
| calmodulin-domain protein kinase CDPK isoform 5 (CPK5) ; supported by cDNA: gi_1399272_gb_U31834.1_ATU31834                                           | 253167_at   | 1.5 |
| protein kinase - like protein protein kinase SRPK1, Mus musculus, PID:d1026227                                                                        | 253137_at   | 1.5 |
| putative protein glutamic acid-rich protein precursor, Plasmodium falciparum (GARP), PIR2:A54514                                                      | 253111_at   | 1.5 |
| putative protein various predicted proteins, Arabidopsis thaliana                                                                                     | 253092_at   | 1.5 |
| DNA-binding protein - like DNA-binding protein R kappa B, Homo sapiens, PIR:S52863                                                                    | 252546_at   | 1.5 |
| putative protein several hypothetical proteins                                                                                                        | 252496_at   | 1.5 |
| putative peptide transporter peptide transporter (ptr1), Hordeum vulgare, AF023472; supported by cDNA: gi_13877878_gb_AF370202.1_AF370202             | 252377_at   | 1.5 |
| serine palmitoyltransferase-like protein                                                                                                              | 252331_s_at | 1.5 |
| putative protein various predicted proteins, Arabidopsis thaliana                                                                                     | 252290_at   | 1.5 |

|                                                                                                                                                                                                         |             |     |
|---------------------------------------------------------------------------------------------------------------------------------------------------------------------------------------------------------|-------------|-----|
| receptor-protein kinase-like protein receptor-like protein kinase, <i>Catharanthus roseus</i> , PIR:T10060; supported by cDNA: gi_14334759_gb_AY03505                                                   | 252066_at   | 1.5 |
| putative protein arm repeat containing protein, <i>Brassica napus</i> , AF024625                                                                                                                        | 251862_at   | 1.5 |
| chalcone isomerase ; supported by full-length cDNA: Ceres:2122.                                                                                                                                         | 251827_at   | 1.5 |
| putative protein CARBON CATABOLITE REPRESSOR PROTEIN 4 - <i>Saccharomyces cerevisiae</i> , SWISSPROT:CCR4_YEAST                                                                                         | 251582_at   | 1.5 |
| putative protein ETHIONINE AMINOPEPTIDASE 2 (EC 3.4.11.18) - <i>Mus musculus</i> , EMBL:AB003144; supported by full-length cDNA: Ceres:115696.                                                          | 251444_at   | 1.5 |
| putative protein predicted protein, <i>Synechocystis sp.</i> , PIR:S74969; supported by full-length cDNA: Ceres:110188.                                                                                 | 250865_at   | 1.5 |
| putative protein predicted protein, <i>Arabidopsis thaliana</i>                                                                                                                                         | 250877_at   | 1.5 |
| cysteine proteinase inhibitor-like protein ; supported by full-length cDNA: Ceres:27304.                                                                                                                | 250811_at   | 1.5 |
| ankyrin-like protein                                                                                                                                                                                    | 250761_at   | 1.5 |
| serine/threonine protein kinase -like protein probable serine/threonine protein kinase SNFL3, sorghum, PIR:T14822; supported by cDNA: gi_928063                                                         | 250408_at   | 1.5 |
| putative protein similar to unknown protein (emb CAB51351.1)                                                                                                                                            | 250309_at   | 1.5 |
| putative protein similar to unknown protein (emb CAB69839.1)                                                                                                                                            | 250257_at   | 1.5 |
| putative protein similar to unknown protein (pir  S77419); supported by cDNA: gi_15912216_gb_AY056386.1_                                                                                                | 250259_at   | 1.5 |
| Ser/Thr specific protein kinase - like protein various protein kinase, <i>Arabidopsis thaliana</i> ; supported by full-length cDNA: Ceres:15535.                                                        | 249985_at   | 1.5 |
| zinc finger protein-like ; supported by full-length cDNA: Ceres: 16392.                                                                                                                                 | 249888_s_at | 1.5 |
| unknown protein ; supported by cDNA: gi_9695278_dbj_AB046717.1_AB046717                                                                                                                                 | 249840_at   | 1.5 |
| NADH dehydrogenase (ubiquinone) (EC 1.6.5.3) 76K chain precursor - like protein NADH dehydrogenase (ubiquinone) (EC 1.6.5.3) 76K chain precursor                                                        | 249627_at   | 1.5 |
| cytosolic malate dehydrogenase ; supported by full-length cDNA: Ceres:40174.                                                                                                                            | 249147_at   | 1.5 |
| 1-aminocyclopropane-1-carboxylate oxidase ; supported by cDNA: gi_14596164_gb_AY042870.1_                                                                                                               | 249125_at   | 1.5 |
| ATP dependent copper transporter ; supported by cDNA: gi_14194134_gb_AF367273.1_AF367273                                                                                                                | 249027_at   | 1.5 |
| putative protein similar to unknown protein (pir  T05524); supported by full-length cDNA: Ceres:767.                                                                                                    | 248952_at   | 1.5 |
| ADPG pyrophosphorylase small subunit (gb AAC39441.1); supported by cDNA: gi_15146247_gb_AY049265.1_                                                                                                     | 248687_at   | 1.5 |
| peptidylprolyl isomerase                                                                                                                                                                                | 248657_at   | 1.5 |
| methionine S-methyltransferase (gb AAD49574.1) ; supported by cDNA: gi_5733428_gb_AF137380.1_AF137380                                                                                                   | 248576_at   | 1.5 |
| putative protein strong similarity to unknown protein (pir  T05518)                                                                                                                                     | 248495_at   | 1.5 |
| putative protein similar to unknown protein (pir  S42136)                                                                                                                                               | 248357_at   | 1.5 |
| non phototropic hypocotyl 1-like ; supported by cDNA: gi_5391441_gb_AF053941.2_AF053941                                                                                                                 | 247853_at   | 1.5 |
| dehydrodichilchyl diphosphate - like protein dehydrodichilchyl diphosphate, <i>Arabidopsis thaliana</i> , EMBL:ATH277136                                                                                | 247780_at   | 1.5 |
| autophagocytosis protein - like autophagocytosis protein AUT1, <i>Saccharomyces cerevisiae</i> , PIR:S45130; supported by full-length cDNA: Ceres:8184                                                  | 247542_at   | 1.5 |
| dehydrogenase ; supported by cDNA: gi_15383743_gb_AY039787.1_                                                                                                                                           | 247436_at   | 1.5 |
| pyruvate kinase                                                                                                                                                                                         | 247338_at   | 1.5 |
| putative protein contains similarity to FtsH                                                                                                                                                            | 247235_at   | 1.5 |
| proteasome regulatory subunit-like ; supported by cDNA: gi_17063180_gb_AY062113.1_                                                                                                                      | 247257_at   | 1.5 |
| putative protein strong similarity to unknown protein (pir  T04718); supported by cDNA: gi_15529177_gb_AY052213.1_                                                                                      | 247013_at   | 1.5 |
| dehydration-induced protein RD22 ; supported by cDNA: gi_16974545_gb_AY060560.1_                                                                                                                        | 246908_at   | 1.5 |
| chaperonin gamma chain - like protein chaperonin containing TCP-1 complex gamma chain, African clawed frog, PIR:S54210; supported by cDNA: gi_16974545_gb_AY060560.1_                                   | 246830_at   | 1.5 |
| putative protein GTP-binding proteins at the N-terminus                                                                                                                                                 | 246775_at   | 1.5 |
| putative protein predicted protein, <i>Arabidopsis thaliana</i> ; supported by cDNA: gi_16930704_gb_AF436836.1_AF436836                                                                                 | 246660_at   | 1.5 |
| putative protein gamma-tubulin interacting protein - <i>Xenopus laevis</i> , EMBL:AF052663                                                                                                              | 246329_at   | 1.5 |
| putative protein hnRNP A/B related protein - <i>Felis catus</i> , EMBL:AF153444; supported by cDNA: gi_14194148_gb_AF367280.1_AF367280                                                                  | 246292_at   | 1.5 |
| putative protein thiamin pyrophosphokinase, <i>Schizosaccharomyces pombe</i> , PIR:S52350                                                                                                               | 246038_s_at | 1.5 |
| putative protein DNA-binding protein - <i>Triticum aestivum</i> , EMBL:AF091837; supported by full-length cDNA: Ceres:249741.                                                                           | 245888_at   | 1.5 |
| ferredoxin-dependent glutamate synthase ; supported by cDNA: gi_3869250_gb_U39287.1_ATU39287                                                                                                            | 245701_at   | 1.5 |
| AMP-binding protein                                                                                                                                                                                     | 245621_at   | 1.5 |
| acyl-CoA oxidase like protein ; supported by cDNA: gi_3044213_gb_AF057044.1_AF057044                                                                                                                    | 245249_at   | 1.5 |
| viral resistance protein, putative, 5 partial similar to viral resistance protein GI:7110565 from [ <i>Arabidopsis thaliana</i> ]                                                                       | 245218_s_at | 1.5 |
| mitochondrial chaperonin (HSP60)                                                                                                                                                                        | 245164_at   | 1.5 |
| ribosomal protein S3                                                                                                                                                                                    | 244984_at   | 1.5 |
| ATPase, putative similar to chromaffin granule ATPase II GB: AAD03352 GI:4115341 from [ <i>Bos taurus</i> ]                                                                                             | 262275_at   | 1.5 |
| putative DNA binding protein ; supported by cDNA: gi_11908071_gb_AF326883.1_AF326883                                                                                                                    | 267538_at   | 1.4 |
| putative protein kinase contains a protein kinase domain profile (PDOC00100); supported by cDNA: gi_2852448_dbj_D88207.1_D88207                                                                         | 267486_at   | 1.4 |
| unknown protein                                                                                                                                                                                         | 267312_at   | 1.4 |
| hypothetical protein predicted by genscan                                                                                                                                                               | 267130_at   | 1.4 |
| putative AMP deaminase ; supported by cDNA: gi_15810524_gb_AY056301.1_                                                                                                                                  | 267095_at   | 1.4 |
| putative RNA-binding protein ; supported by cDNA: gi_16612301_gb_AF439844.1_AF439844                                                                                                                    | 267050_at   | 1.4 |
| putative ABC transporter                                                                                                                                                                                | 266990_at   | 1.4 |
| unknown protein                                                                                                                                                                                         | 266855_at   | 1.4 |
| putative casein kinase I                                                                                                                                                                                | 266651_at   | 1.4 |
| TINY-like AP2 domain transcription factor ; supported by cDNA: gi_13878156_gb_AF370341.1_AF370341                                                                                                       | 266661_at   | 1.4 |
| unknown protein ; supported by cDNA: gi_14030738_gb_AF375460.1_AF375460                                                                                                                                 | 266617_at   | 1.4 |
| unknown protein                                                                                                                                                                                         | 266185_at   | 1.4 |
| unknown protein                                                                                                                                                                                         | 266090_at   | 1.4 |
| putative WD-40 repeat protein, MSI4 almost identical to GB:2599091; contains a Trp-Asp (WD-40) repeat signature; supported by cDNA: gi_2599091_gb_265946_s_at                                           | 265946_s_at | 1.4 |
| hypothetical protein predicted by genscan; supported by full-length cDNA: Ceres:21954.                                                                                                                  | 265912_at   | 1.4 |
| unknown protein ; supported by full-length cDNA: Ceres:121540.                                                                                                                                          | 265871_at   | 1.4 |
| putative nitrilase ; supported by full-length cDNA: Ceres:20875.                                                                                                                                        | 265642_at   | 1.4 |
| Expressed protein ; supported by full-length cDNA: Ceres: 16367.                                                                                                                                        | 265627_at   | 1.4 |
| hypothetical protein predicted by genefinder                                                                                                                                                            | 265310_at   | 1.4 |
| unknown protein similar to putative tyrosine phosphatase GB:AAF81798 GI:8926334 from [ <i>Oryza sativa</i> ]; supported by full-length cDNA: Ceres:8301.                                                | 265073_at   | 1.4 |
| putative plastid RNA polymerase sigma-subunit similar to GB:BAA22427 and EST gb N65838; supported by cDNA: gi_2353172_gb_AF015543.1_AF015543                                                            | 264781_at   | 1.4 |
| unknown protein location of EST gb H36530, gb AA395402, and gb T43793                                                                                                                                   | 264772_at   | 1.4 |
| 5 -adenylylphosphosulfate reductase, putative similar to 5 -adenylylphosphosulfate reductase GI:1336168 from [ <i>Arabidopsis thaliana</i> ]; supported by full-length cDNA: gi_15293160_gb_AY051014.1_ | 264745_at   | 1.4 |
| hypothetical protein similar to hypothetical protein GI:4455225 from [ <i>Arabidopsis thaliana</i> ]; supported by cDNA: gi_15293160_gb_AY051014.1_                                                     | 264701_at   | 1.4 |
| unknown protein                                                                                                                                                                                         | 264597_at   | 1.4 |
| putative cinnamyl alcohol dehydrogenase similar to cinnamyl alcohol dehydrogenase, gi 1143445; supported by cDNA: gi_15983385_gb_AF424567                                                               | 264514_at   | 1.4 |
| unknown protein similar to ESTs gb N96021 and gb N96863                                                                                                                                                 | 264458_at   | 1.4 |
| hypothetical protein contains similarity to glycosyltransferase GI:871530 from [ <i>Saccharomyces cerevisiae</i> ]                                                                                      | 264291_at   | 1.4 |
| beta-glucosidase, putative similar to beta-glucosidase GI:9758949 from [ <i>Arabidopsis thaliana</i> ]                                                                                                  | 264271_at   | 1.4 |
| unknown protein contains similarity to splicing factor required for vegetative and meiotic growth GI:2959374 from [ <i>Schizosaccharomyces pombe</i> ]; supported by full-length cDNA: gi_264221_s_at   | 264221_s_at | 1.4 |
| receptor kinase, putative similar to receptor kinase 1 GI:9294449 from [ <i>Arabidopsis thaliana</i> ]                                                                                                  | 264223_s_at | 1.4 |
| putative gigantea protein strong similarity to GB:CAB56039 from [ <i>Arabidopsis thaliana</i> ]; supported by cDNA: gi_6002679_gb_AF105064.1_AF105064                                                   | 264211_at   | 1.4 |
| unknown protein similar to putative CREB-binding protein GI:7025854 from [ <i>Arabidopsis thaliana</i> ]; supported by cDNA: gi_12597460_gb_AF323954.                                                   | 264101_at   | 1.4 |
| RNA helicase, putative similar to RNA helicase GI:3776015 from [ <i>Arabidopsis thaliana</i> ]; supported by cDNA: gi_15983391_gb_AF424570.1_AF424570                                                   | 263679_at   | 1.4 |
| unknown protein Location of ESTs 108M14T7, gb T41823 and 108M14XP 3 , gb AA395002; supported by cDNA: gi_14335101_gb_AY037230.1_                                                                        | 263692_at   | 1.4 |
| receptor kinase, putative similar to receptor kinase 1 [ <i>Brassica rapa</i> ] GB:BAA23676                                                                                                             | 262926_s_at | 1.4 |
| glyceraldehyde-3-phosphate dehydrogenase, putative similar to glyceraldehyde-3-phosphate dehydrogenase GI:1100222 from [ <i>Pinus sylvestris</i> ]                                                      | 262939_s_at | 1.4 |
| unknown protein contains similarity to helicase GI:914852 from [ <i>Homo sapiens</i> ]                                                                                                                  | 262906_at   | 1.4 |

plastid RNA polymerase sigma-subunit identical to plastid RNA polymerase sigma-subunit GI:2398851 from [Arabidopsis thaliana]; supported by cDN 262879\_at 1.4  
putative SPL1-related protein similar to GB:CAB56770, part of the SBP-box gene family that codes for transcription factors 262798\_at 1.4  
unknown protein ESTs gb|T04357 and gb|AA595092 come from this gene; supported by full-length cDNA: Ceres:114103. 262710\_at 1.4  
unknown protein 262677\_at 1.4  
late embryogenesis abundant protein (EMB8), putative similar to late embryogenesis abundant protein (EMB8) GI:1350544 from [Picea glauca] 262561\_at 1.4  
putative glutathione transferase One of three repeated glutathione transferases. 65% identical to glutathione transferase [Arabidopsis thaliana] (gi)40 262516\_at 1.4  
cytochrome b245 beta chain homolog RbohAp108, putative similar to cytochrome b245 beta chain homolog RbohAp108 GB:T03826 GI:7484893 from 262344\_at 1.4  
unknown protein similar to hypothetical protein GB:AAF07360 from [Arabidopsis thaliana]; supported by cDNA: gi\_15810007\_gb\_AY054272.1\_ 262346\_at 1.4  
glycosyl transferase, putative similar to Pfam profile: PF00534 Glycosyl transferases group 1 262155\_at 1.4  
GTP-binding protein, putative similar to GTP-binding protein GB:AAF31009 GI:6899606 from [Ureaplasma urealyticum] 262086\_at 1.4  
transcription factor, putative similar to Transcription factor GB:CAA74053 GI:2398533 from [Arabidopsis thaliana]; supported by full-length cDNA: Ce 262098\_at 1.4  
putative DnaJ protein contains Pfam profile: PF00226 DnaJ, prokaryotic heat shock protein; similar to hypothetical protein GB:AAD55462 (Arabidops 262053\_at 1.4  
ribosomal protein L7, putative similar to ribosomal protein L7 GB:AAA03081 GI:307388 from [Homo sapiens] 261911\_at 1.4  
Expressed protein ; supported by full-length cDNA: Ceres: 39481. 261858\_at 1.4  
transcription factor, putative similar to transcription factor GB:CAA74050 GI:2398525 from [Arabidopsis thaliana] 261803\_at 1.4  
hypothetical protein predicted by genemark.hmm 261762\_at 1.4  
ADP-glucose pyrophosphorylase, putative similar to ADP-glucose pyrophosphorylase GB:X78900 GI:556623 from [Beta vulgaris] 261642\_at 1.4  
CAF protein identical to RNA helicase/RNAsell CAF protein GB:AAF03534 GI:6102610 from [Arabidopsis thaliana]; supported by cDNA: gi\_115596- 261584\_at 1.4  
unknown protein ; supported by cDNA: gi\_16604588\_gb\_AY059739.1\_ 261538\_at 1.4  
endoplasmic reticulum-type calcium-transporting ATPase 4 identical to GB:AAD29957 from [Arabidopsis thaliana] (Plant Physiol. 120 (1999) In press 261433\_s\_at 1.4  
fatty acid elongase 3-ketoacyl-CoA synthase, putative similar to GB:AAC99312 from [Arabidopsis thaliana] (Plant J. (1999) In press); supported by c 261420\_at 1.4  
hypothetical protein contains similarity to Na<sup>+</sup>/H<sup>+</sup> antiporter GI:1655701 from [Xenopus laevis] 261398\_at 1.4  
unknown protein ; supported by cDNA: gi\_14596146\_gb\_AY042861.1\_ 261337\_at 1.4  
unknown protein ; supported by full-length cDNA: Ceres:6672. 261153\_at 1.4  
Expressed protein ; supported by full-length cDNA: Ceres: 41453. 260984\_at 1.4  
dTDP-D-glucose 4,6-dehydratase, putative similar to GI:4128133 from (Homo sapiens); supported by cDNA: gi\_15081768\_gb\_AY048277.1\_ 260985\_at 1.4  
unknown protein ; supported by cDNA: gi\_15028086\_gb\_AY045900.1\_ 260832\_at 1.4  
unknown protein 260598\_at 1.4  
unknown protein 260580\_at 1.4  
putative aminopeptidase similar to aminopeptidase N (alpha-aminoacylpeptide hydrolase) GB:P04825 [Escherichia coli]; contains Pfam profile: PF00 260295\_at 1.4  
putative phosphoribosylformylglycinamide synthase similar to GB:K1AA0361 from [Homo sapiens] 260250\_at 1.4  
putative RNA-binding protein contains Pfam profile: PF00076 RNA recognition motif. (aka RRM, RBD, or RNP domain); similar to putative protein GI 260160\_at 1.4  
unknown protein similar to C-terminal half of myosin heavy chain: GB:BAA22067 [Cyprinus carpio], GB:P13538 [Gallus gallus], GB:P12847 [Rattus 260000\_at 1.4  
hypothetical protein contains Pfam profile: PF00515 TPR Domain (5 copies) 259973\_at 1.4  
putative catechol O-methyltransferase similar to catechol O-methyltransferase GB:CAA55358 [Vanilla planifolia]; supported by full-length cDNA: Cere 259878\_at 1.4  
hypothetical protein contains Pfam profile: PF00439 Bromodomain 259885\_at 1.4  
unknown protein supported by cDNA: Ceres:35985; supported by cDNA: gi\_13877918\_gb\_AF370222.1\_AF370222 259739\_at 1.4  
putative serine/threonine-protein kinase similar to SERINE/THREONINE-PROTEIN KINASE ASK1 GB:P43291 from [Arabidopsis thaliana]; supportec 259724\_at 1.4  
myb-related transcription factor (cpm10), putative similar to myb-related transcription factor (cpm10) GB:U33915 GI:1002795 from [Craterostigma pl 259618\_at 1.4  
hypothetical protein ; supported by cDNA: gi\_14532585\_gb\_AY039917.1\_ 259561\_at 1.4  
hypothetical protein ; supported by cDNA: gi\_13937176\_gb\_AF372942.1\_AF372942 259545\_at 1.4  
putative glycogen synthase similar to glycogen synthase precursor (Granule-Bound Starch Synthase II) GB:Q43093 from [Pisum sativum]; supported 259277\_at 1.4  
putative heat-shock protein similar to heat-shock protein precursor GB:S49340 [Secale cereale]; contains Pfam profile: Heat shock hsp90 proteins 259248\_at 1.4  
hypothetical protein contains bromodomain, predicted by genscan; supported by cDNA: gi\_16323116\_gb\_AY057662.1\_ 259164\_at 1.4  
alpha subunit of F-actin capping protein supported by full-length cDNA: Ceres:33531. 259111\_at 1.4  
putative serine carboxypeptidase precursor identical to serine carboxypeptidase precursor GB:P32826 [Arabidopsis thaliana] up to residue 514 258970\_at 1.4  
putative UDP-glucose pyrophosphorylase similar to UDP-glucose pyrophosphorylase GB:AAB71613 from [Solanum tuberosum]; supported by cDNA 258849\_at 1.4  
putative ubiquitin carboxyl-terminal hydrolase similar to ubiquitin carboxyl-terminal hydrolase GB:AAF01440 [Schizosaccharomyces pombe] 258780\_at 1.4  
putative transitional endoplasmic reticulum ATPase identical to cell division cycle protein 48 (CDC48) homolog GB:P54609 (EMBO J. 14 (22), 5626- 258649\_at 1.4  
hypothetical protein predicted by genscan; supported by cDNA: gi\_15982780\_gb\_AY057497.1\_ 258660\_at 1.4  
UDP-glucose:sterol glucosyltransferase UDP-glucose:sterol glucosyltransferase GB:Z83833 [Arabidopsis thaliana]; supported by cDNA: gi\_15982777 258556\_at 1.4  
hypothetical protein 258533\_at 1.4  
alternative oxidase 1a precursor identical to GB:Q39219 from [Arabidopsis thaliana]; supported by full-length cDNA: Ceres:116257. 258452\_at 1.4  
unknown protein ; supported by full-length cDNA: Ceres:13305. 258455\_at 1.4  
putative coatomer complex subunit similar to subunit of coatomer complex GB:X70476 from [Homo sapiens] 258331\_at 1.4  
myosin heavy chain-like protein similar to myosin heavy chain GB:L03534 from [Entamoeba histolytica] 258333\_at 1.4  
hypothetical protein predicted by genemark.hmm; supported by cDNA: gi\_15028198\_gb\_AY045922.1\_ 258206\_at 1.4  
hypothetical protein predicted by genemark.hmm 258126\_at 1.4  
putative cytochrome P450 similar to GB:Q05047 from [Catharanthus roseus] 258114\_at 1.4  
FtsH protease, putative contains similarity to cell division protein FtsH GI:1652085 from [Synechocystis sp. PCC 6803] 258048\_at 1.4  
calmodulin-binding protein, putative contains Pfam profile: PF00612 IQ calmodulin-binding motif (3 copies) 257883\_at 1.4  
hypothetical protein predicted by genemark.hmm 257864\_at 1.4  
RING zinc finger protein, putative contains Pfam profile: PF00097 zinc finger, C3HC4 type (RING finger) 257826\_at 1.4  
hypothetical protein predicted by genscan+ 257708\_at 1.4  
root hair defective 3 (RHD3) identical to GB:AAB58375 from [Arabidopsis thaliana] (Genes Dev (1997) 11(6), 799-811) 257606\_at 1.4  
unknown protein ; supported by cDNA: gi\_13811668\_gb\_AF356816.1\_AF356816 256681\_at 1.4  
unknown protein contains similarity to phospholipase a-2-activating protein SP:P27612 from [Mus musculus]; supported by cDNA: gi\_15294239\_gb\_ 256657\_at 1.4  
myosin identical to myosin GB:CAB61875 GI:6491702 [Arabidopsis thaliana] 256623\_at 1.4  
hypothetical protein 256210\_at 1.4  
4-coumarate:CoA ligase 1 identical to 4-coumarate:CoA ligase 1 [Arabidopsis thaliana] GI:5702184; supported by cDNA: gi\_609339\_gb\_U18675.1\_ 256186\_at 1.4  
hypothetical protein contains similarity to nuclear DNA helicase II GI:577738 from [Bos taurus] 256140\_at 1.4  
hypothetical protein similar to putative glutamine dependent NAD<sup>+</sup> synthetase GB:O74940 GI:8928216 from [Schizosaccharomyces pombe] 256148\_at 1.4  
p68 RNA helicase, putative similar to p68 RNA helicase (Schizosaccharomyces pombe) GI:173419 255749\_at 1.4  
putative protein 255664\_at 1.4  
Expressed protein ; supported by full-length cDNA: Ceres: 39479. 255671\_at 1.4  
hypothetical protein 255604\_at 1.4  
predicted protein of unknown function 255544\_at 1.4  
coded for by A. thaliana cDNA T04215 similar to epoxide hydrolases 255525\_at 1.4  
tryptophan synthase alpha 1-like protein similar to A. thaliana tryptophan synthase alpha chain (EC 4.2.1.20), GenBank accession number U18993 255487\_at 1.4  
hypothetical protein 255429\_at 1.4  
hypothetical protein 255348\_at 1.4  
putative protein glutamic acid-rich protein precursor - Plasmodium falciparum, PIR2:A54514 255128\_at 1.4  
putative zinc finger protein 255094\_at 1.4  
putative protein hypothetical protein sli1775 - Synechocystis sp., PIR2:S77106 255008\_at 1.4  
lipase-like protein monoglyceride lipase - Mus musculus, PID:e1184892; supported by full-length cDNA: Ceres:6822. 255010\_at 1.4  
putative translation initiation factor IF-2 translation initiation factor IF-2 - Haemophilus influenzae, PIR2:E64114 254904\_at 1.4  
putative protein hypothetical protein, Synechocystis sp., PIR2:S76637 254715\_at 1.4

|                                                                                                                                                     |             |     |
|-----------------------------------------------------------------------------------------------------------------------------------------------------|-------------|-----|
| putative protein IFA-binding protein, Arabidopsis thaliana, AF004556                                                                                | 254724_at   | 1.4 |
| putative protein KIAA0682 protein, Homo sapiens, AB014582                                                                                           | 254527_at   | 1.4 |
| acyl-CoA synthetase - like protein acyl-CoA synthetase, Brassica napus, X94624; supported by cDNA: gi_15146195_gb_AY049239.1_                       | 254192_at   | 1.4 |
| putative protein several hypothetical proteins - Arabidopsis thaliana                                                                               | 254061_at   | 1.4 |
| putative phosphatidylserine decarboxylase phosphatidylserine decarboxylase (EC 4.1.1.65) 2 - yeast, Pir2:S64484                                     | 254035_at   | 1.4 |
| protein phosphatase ABI1 ; supported by cDNA: gi_14334799_gb_AY035073.1_                                                                            | 253994_at   | 1.4 |
| sucrose-like protein sucrose cleavage protein - potato, Pir2:S51376;supported by full-length cDNA: Ceres:111209.                                    | 253980_at   | 1.4 |
| Avr9 elicitor response like protein Avr9 elicitor response protein - Nicotiana tabacum, PID:e1363999;supported by full-length cDNA: Ceres:149102.   | 253948_at   | 1.4 |
| NADPH-ferrihemoprotein reductase (ATR2)                                                                                                             | 253664_at   | 1.4 |
| putative protein putative ATPase - Haematobia irritans,PID:g525318;supported by full-length cDNA: Ceres:4.                                          | 253630_at   | 1.4 |
| putative zinc finger protein hypothetical protein YLR387c, Saccharomyces cerevisiae, PIR2:S51474; supported by cDNA: gi_13878012_gb_AF3702          | 253526_at   | 1.4 |
| putative protein predicted protein T10M13.8, Arabidopsis thaliana                                                                                   | 253446_at   | 1.4 |
| putative protein protein phosphatase Wip1, Homo sapiens, PID:g2218063;supported by full-length cDNA: Ceres:40123.                                   | 253323_at   | 1.4 |
| protein kinase - like protein protein kinase, 41K, Arabidopsis thaliana,PIR2:S71172; supported by cDNA: gi_15451087_gb_AY054624.1_                  | 253264_at   | 1.4 |
| putative protein ;supported by full-length cDNA: Ceres:32357.                                                                                       | 253229_at   | 1.4 |
| formamidase - like protein formamidase, Methylophilus methylotrophus,PIR2:S74213;supported by full-length cDNA: Ceres:23732.                        | 253042_at   | 1.4 |
| glycine hydroxymethyltransferase like protein glycine hydroxymethyltransferase -Solanum tuberosum,PID:g438247;supported by full-length cDNA: C      | 253009_at   | 1.4 |
| putative protein hypothetical protein At2g28360 - Arabidopsis thaliana, EMBL:AAD20690                                                               | 252613_at   | 1.4 |
| isovaleryl-CoA-dehydrogenase precursor (IVD) ;supported by full-length cDNA: Ceres:33674.                                                           | 252570_at   | 1.4 |
| protein kinase - like protein Raf protein kinase homolog CTR1 - Arabidopsis thaliana,PIR2:A45178                                                    | 252469_at   | 1.4 |
| ABC-type transport protein-like protein AbcA, Dictyostelium discoideum, DDU66526                                                                    | 252379_at   | 1.4 |
| BCS1 protein-like protein Homo sapiens h-bcs1 (BCS1) mRNA, nuclear gene encoding mitochondrial protein which is involved in the expression of f     | 252131_at   | 1.4 |
| CDC48 - like protein transitional endoplasmic reticulum ATPase, Arabidopsis thaliana, PIR:S60112                                                    | 251975_at   | 1.4 |
| TATA box binding protein (TBP) associated factor (TAF) -like protein TAF-172, Homo sapiens, EMBL:AF038362                                           | 251876_at   | 1.4 |
| FKBP12 interacting protein (FIP37) ; supported by cDNA: gi_3859943_gb_AF084570.1_AF084570                                                           | 251887_at   | 1.4 |
| putative protein GTP-binding regulatory protein beta chain, Dictyostelium discoideum, PIR:A47370; supported by cDNA: gi_13430701_gb_AF36026         | 251888_at   | 1.4 |
| putative protein MSP58 - nucleolar protein, Mus musculus, EMBL:AF015309; supported by cDNA: gi_17063177_gb_AY062111.1_                              | 251866_at   | 1.4 |
| putative protein                                                                                                                                    | 251646_at   | 1.4 |
| putative zinc-finger protein zinc-finger protein - Schizosaccharomyces pombe, PIR:T41264                                                            | 251253_at   | 1.4 |
| putative protein PGP237-11, Petunia x hybrida, EMBL:AF049930                                                                                        | 251198_at   | 1.4 |
| putative protein SqdX protein, Synechococcus PCC7942, EMBL:SP45308; supported by cDNA: gi_15028316_gb_AY045961.1_                                   | 251143_at   | 1.4 |
| putative protein putative proteins - Arabidopsis thaliana; supported by cDNA: gi_15292802_gb_AY050835.1_                                            | 251084_at   | 1.4 |
| putative protein histone H2A, garden pea, PIR:JQ1183; supported by full-length cDNA: Ceres: 1553.                                                   | 251011_at   | 1.4 |
| putative protein P58 protein, Bos primigenius taurus, PIR:A56534;supported by full-length cDNA: Ceres:146009.                                       | 250930_at   | 1.4 |
| putative protein ; supported by cDNA: gi_14423557_gb_AF387016.1_AF387016                                                                            | 250897_at   | 1.4 |
| cell division related protein-like                                                                                                                  | 250711_at   | 1.4 |
| ubiquitin activating enzyme 2 (UBA2) identical to gi:1703477                                                                                        | 250729_at   | 1.4 |
| transcription factor-like protein ; supported by cDNA: gi_14334943_gb_AY035145.1_                                                                   | 250598_at   | 1.4 |
| putative protein heparanase precursor, Homo sapiens, EMBL:AF155510                                                                                  | 250604_at   | 1.4 |
| nucleoid DNA-binding protein cnd41 - like protein nucleoid DNA-binding protein cnd41, chloroplast, common tobacco, PIR:T01996                       | 250446_at   | 1.4 |
| putative protein contains similarity to unknown protein (pir T05576)                                                                                | 250305_at   | 1.4 |
| unknown protein                                                                                                                                     | 250238_at   | 1.4 |
| isocitrate dehydrogenase - like protein isocitrate dehydrogenase, Nicotiana tabacum, pir:T04356                                                     | 250197_at   | 1.4 |
| 2-hydroxyphytanoyl-CoA lyase-like protein                                                                                                           | 250094_at   | 1.4 |
| putative protein contains similarity to transcription regulator; supported by cDNA: gi_13877644_gb_AF370523.1_AF370523                              | 250035_at   | 1.4 |
| 2-isopropylmalate synthase-like; homocitrate synthase-like ; supported by cDNA: gi_12330688_gb_AF327648.1_AF327648                                  | 249866_at   | 1.4 |
| putative protein contains similarity to DsPTP1 protein                                                                                              | 249792_at   | 1.4 |
| putative protein tyrosine aminotransferase-like; also similar to nicotianamine aminotransferase                                                     | 249688_at   | 1.4 |
| expressed protein predicted protein, Synechocystis sp., PIR:S77152; supported by full-length cDNA: Ceres: 5331.                                     | 249454_at   | 1.4 |
| putative protein similar to unknown protein (pir T30561)                                                                                            | 249240_at   | 1.4 |
| 5-3 exoribonuclease 2 ; supported by cDNA: gi_11875629_gb_AF286720.1_AF286720                                                                       | 249200_at   | 1.4 |
| GTP-binding protein-like; root hair defective 3 protein-like                                                                                        | 248985_at   | 1.4 |
| disease resistance protein-like                                                                                                                     | 248995_at   | 1.4 |
| ornithine aminotransferase                                                                                                                          | 248879_at   | 1.4 |
| putative protein contains similarity to peptide:N-glycanase                                                                                         | 248615_at   | 1.4 |
| putative protein similar to unknown protein (sp O15736)                                                                                             | 248543_at   | 1.4 |
| DEAD-box protein abstract                                                                                                                           | 248442_at   | 1.4 |
| cleavage and polyadenylation specificity factor subunit                                                                                             | 248418_at   | 1.4 |
| SKP1 interacting partner 1 (SKIP1) identical to SKP1 interacting partner 1 GI:10716947 from [Arabidopsis thaliana];supported by full-length cDNA: C | 247863_at   | 1.4 |
| subtilisin-like serine protease contains similarity to prepro-cucumisin GI:807698 from [Cucumis melo]                                               | 247760_at   | 1.4 |
| serine/threonine-specific protein kinase - like putative protein serine /threonine kinase, Sorghum bicolor, EMBL:SBRLK1                             | 247684_at   | 1.4 |
| carbonyl reductase - like protein inducible carbonyl reductase, Rattus norvegicus, EMBL:RND0691                                                     | 247489_at   | 1.4 |
| putative protein similar to unknown protein (pir T01734)                                                                                            | 247410_at   | 1.4 |
| glucosidase II alpha subunit                                                                                                                        | 247298_at   | 1.4 |
| putative protein contains similarity to auxin-independent growth promoter                                                                           | 247186_at   | 1.4 |
| 2-oxoglutarate dehydrogenase, E1 component                                                                                                          | 247155_at   | 1.4 |
| lysosomal Pro-X carboxypeptidase                                                                                                                    | 247156_at   | 1.4 |
| putative protein contains similarity to MYB-like DNA-binding protein; supported by cDNA: gi_14532517_gb_AY039883.1_                                 | 247012_at   | 1.4 |
| calcium-dependent protein kinase ; supported by cDNA: gi_289189_gb_L14771.1_ATHCALLIPR                                                              | 246955_at   | 1.4 |
| transcription factor-like protein light-induced protein CPRF-2 - Petroselinum crispum, PIR:S16321                                                   | 246962_s_at | 1.4 |
| putative protein CG6949 - Drosophila melanogaster, EMBL:AE003739                                                                                    | 246767_at   | 1.4 |
| protein kinase -like protein Ste-20 related kinase SPAK, Homo sapiens, EMBL:AF099989                                                                | 246583_at   | 1.4 |
| putative protein KIAA1468 - Homo sapiens, EMBL:AB040901                                                                                             | 246496_at   | 1.4 |
| putative protein KIAA1012 protein - Homo sapiens, EMBL:AB023229                                                                                     | 246501_at   | 1.4 |
| quinone oxidoreductase - like protein probable quinone oxidoreductase (EC 1.6.5.5) P1, Arabidopsis thaliana, PIR:S57612;supported by full-length c  | 246417_at   | 1.4 |
| putative protein hypothetical protein F2A19.120 - Arabidopsis thaliana, PIR:T47944                                                                  | 246173_s_at | 1.4 |
| putative protein                                                                                                                                    | 246111_at   | 1.4 |
| RAN GTPase activating protein 2 ; supported by cDNA: gi_6708467_gb_AF214560.1_AF214560                                                              | 246061_at   | 1.4 |
| putative protein                                                                                                                                    | 245881_at   | 1.4 |
| chorismate synthase, putative similar to chorismate synthase GI:452796 from [Synechocystis sp.]; supported by cDNA: gi_15982823_gb_AY057519         | 245832_at   | 1.4 |
| hypothetical protein contains similarity to virulence regulator GI:9106522 from [Xylella fastidiosa]                                                | 245751_s_at | 1.4 |
| unknown protein                                                                                                                                     | 245678_at   | 1.4 |
| unknown protein similar to receptor-like protein kinase GI:7529754 from [Arabidopsis thaliana];supported by full-length cDNA: Ceres:36000.          | 245657_at   | 1.4 |
| putative protein                                                                                                                                    | 245588_at   | 1.4 |
| disease resistance RPP5 like protein                                                                                                                | 245448_at   | 1.4 |
| F12A21.2 hypothetical protein; supported by cDNA: gi_14326581_gb_AF385745.1_AF385745                                                                | 245200_at   | 1.4 |
| regulator of chromosome condensation (cell cycle regulatory protein) like                                                                           | 248693_at   | 1.3 |

|                                                                                                                                                                 |             |     |
|-----------------------------------------------------------------------------------------------------------------------------------------------------------------|-------------|-----|
| unknown protein                                                                                                                                                 | 247350_at   | 1.3 |
| hypothetical protein predicted by genscan; similar to SPIQ09298 YQO9_CAEEL                                                                                      | 267632_at   | 1.3 |
| putative protein disulfide isomerase ; supported by cDNA: gi_15810003_gb_AY054270.1_                                                                            | 267605_at   | 1.3 |
| 26S proteasome regulatory subunit                                                                                                                               | 267543_at   | 1.3 |
| hypothetical protein predicted by genscan                                                                                                                       | 267508_at   | 1.3 |
| putative CCAAT-binding transcription factor subunit                                                                                                             | 267315_at   | 1.3 |
| unknown protein                                                                                                                                                 | 267269_at   | 1.3 |
| putative methylenetetrahydrofolate reductase ; supported by cDNA: gi_15215809_gb_AY050434.1_                                                                    | 267187_s_at | 1.3 |
| putative acetone-cyanohydrin lyase                                                                                                                              | 267127_at   | 1.3 |
| putative phosphatidylinositol-4-phosphate 5-kinase ; supported by cDNA: gi_13925628_gb_AF260903.1_AF260903                                                      | 267081_at   | 1.3 |
| unknown protein ; supported by cDNA: gi_15292712_gb_AY050790.1_                                                                                                 | 266898_at   | 1.3 |
| putative signal recognition particle receptor (alpha subunit) ; supported by cDNA: gi_15293184_gb_AY051026.1_                                                   | 266867_at   | 1.3 |
| unknown protein                                                                                                                                                 | 266763_at   | 1.3 |
| Expressed protein ; supported by full-length cDNA: Ceres: 17422.                                                                                                | 266767_at   | 1.3 |
| putative CCCH-type zinc finger protein ;supported by full-length cDNA: Ceres:101255.                                                                            | 266695_at   | 1.3 |
| unknown protein                                                                                                                                                 | 266652_at   | 1.3 |
| putative splicing factor ;supported by full-length cDNA: Ceres:16224.                                                                                           | 266534_at   | 1.3 |
| putative phospholipid cytidyltransferase                                                                                                                        | 266399_at   | 1.3 |
| unknown protein                                                                                                                                                 | 266389_s_at | 1.3 |
| unknown protein ; supported by cDNA: gi_16604650_gb_AY059770.1_                                                                                                 | 266121_at   | 1.3 |
| unknown protein ;supported by full-length cDNA: Ceres:40538.                                                                                                    | 266093_at   | 1.3 |
| putative protein kinase contains a protein kinase domain profile (PDOC00100); supported by cDNA: gi_15810412_gb_AY056245.1_                                     | 266037_at   | 1.3 |
| putative NADP-dependent glyceraldehyde-3-phosphate dehydrogenase ; supported by cDNA: gi_14335051_gb_AY037205.1_                                                | 265998_at   | 1.3 |
| hypothetical protein predicted by genscan and genefinder                                                                                                        | 265957_at   | 1.3 |
| unknown protein                                                                                                                                                 | 265779_at   | 1.3 |
| putative glucan synthase                                                                                                                                        | 265729_at   | 1.3 |
| putative dioxygenase ; supported by cDNA: gi_15292706_gb_AY050787.1_                                                                                            | 265615_at   | 1.3 |
| putative inorganic pyrophosphatase ;supported by full-length cDNA: Ceres:8068.                                                                                  | 265339_at   | 1.3 |
| succinyl-CoA ligase beta subunit ;supported by full-length cDNA: Ceres:36904.                                                                                   | 265257_at   | 1.3 |
| integral membrane protein, putative similar to integral membrane protein GI:1209755 from [Beta vulgaris]                                                        | 264992_at   | 1.3 |
| unknown protein ; supported by cDNA: gi_13926184_gb_AF370567.1_AF370567                                                                                         | 264958_at   | 1.3 |
| phosphatidylinositol 3-kinase, putative similar to phosphatidylinositol 3-kinase GI:736338 from [Glycine max]; supported by cDNA: gi_555699_gb_U-               | 264927_at   | 1.3 |
| NBS/LRR disease resistance protein, putative similar to NBS/LRR disease resistance protein GI:3309619 from [Arabidopsis thaliana]; supported by                 | 264885_s_at | 1.3 |
| putative DNA-binding protein, Myb Identical to A. thaliana Myb-like protein (gb D58424); supported by cDNA: gi_1747309_dbj_D58424.1_D58424                      | 264709_at   | 1.3 |
| tat-binding protein, putative Highly Similar to branched-chain amino acid aminotransferase: Location of EST gb T44177 and gb AA395381; supporte                 | 264524_at   | 1.3 |
| CTP synthase-like protein similar to ctp synthase (sp) P17812 PYRG_HUMAN; similar to ESTs gb AA660762, gb AA220982, dbj AU008137, gb AIO-                       | 264529_at   | 1.3 |
| unknown protein similar to EST gb N96077; supported by cDNA: gi_15810035_gb_AY054286.1_                                                                         | 264407_at   | 1.3 |
| putative aspartic proteinase similar to GB:AAC49730;supported by full-length cDNA: Ceres:8972.                                                                  | 264344_at   | 1.3 |
| unknown protein Contains similarity to tetratricopeptide repeat protein gb U46571 from home sapiens. EST gb Z47802 and gb Z48402 come from thi                  | 264322_at   | 1.3 |
| hypothetical protein similar to hypothetical protein GI:2894571 from [Arabidopsis thaliana];supported by full-length cDNA: Ceres:30230.                         | 264287_at   | 1.3 |
| unknown protein Similar to hypothetical protein C34B7.2 gb 1729503 from C. elegans cosmid gb Z83220                                                             | 264197_at   | 1.3 |
| unknown protein ; supported by full-length cDNA: Ceres:151404.                                                                                                  | 264086_at   | 1.3 |
| putative ubiquitin fusion-degradation protein ;supported by full-length cDNA: Ceres:34470.                                                                      | 263756_at   | 1.3 |
| hypothetical protein predicted by genscan; supported by cDNA: gi_16604630_gb_AY059760.1_                                                                        | 263766_at   | 1.3 |
| putative receptor-like protein kinase                                                                                                                           | 263590_at   | 1.3 |
| unknown protein ; supported by cDNA: gi_15810174_gb_AY056101.1_                                                                                                 | 263333_at   | 1.3 |
| putative nonsense-mediated mRNA decay protein ; supported by cDNA: gi_15810402_gb_AY056240.1_                                                                   | 263334_at   | 1.3 |
| putative GTP-binding protein Similar to WO8E3.3 gj 3880615 putative GTP-binding protein from C. elegans cosmid gb Z92773. EST gb AA597331 cr                    | 263224_at   | 1.3 |
| Ca2+-dependent lipid-binding protein, putative similar to Ca2+-dependent lipid-binding protein (CLB1) GI:2789434 from (Lycopersicon esculentum)                 | 263205_at   | 1.3 |
| unknown protein Similar to gb U51990 pre-mRNA-splicing factor hPrp18 from Homo sapiens. ESTs gb T46391 and gb AA721815 come from this ger                       | 263116_s_at | 1.3 |
| hypothetical protein predicted by genscan and genefinder                                                                                                        | 263085_at   | 1.3 |
| glutathione S-transferase, putative similar to similar to glutathione S-transferase GB:AAF29773 GI:6856103 from (Gossypium hirsutum); supported b               | 262916_at   | 1.3 |
| putative membrane-associated salt-inducible protein strong similarity to gj 3367521 F8K4.8 from Arabidopsis thaliana BAC gb AC004392;supported l                | 262822_at   | 1.3 |
| anthranilate N-hydroxycinnamoyl/benzoyltransferase, putative similar to anthranilate N-hydroxycinnamoyl/benzoyltransferase GB:Z84384 GI:22390E                  | 262744_at   | 1.3 |
| lipase, putative contains Pfam profile: PF00657 Lipase/Acylhydrolase with GDSL-like motif; supported by cDNA: gi_13937188_gb_AF372948.1_AF3                     | 262748_at   | 1.3 |
| putative translation initiation factor IF2 Except for first 311 amino acids. 41% identical to translation initiation factor IF2 [Bacillus subtilis] (gi 124209) | 262483_at   | 1.3 |
| hypothetical protein similar to hypothetical protein GB:AAD50003 GI:5734738 from [Arabidopsis thaliana];supported by full-length cDNA: Ceres:3759               | 262452_at   | 1.3 |
| hypothetical protein identical to hypothetical protein GB:AAD50051 GI:5734786 from [Arabidopsis thaliana]; supported by cDNA: gi_15081691_gb_A                  | 262419_at   | 1.3 |
| serpin, putative similar to serpin GB:X95277 GI:1197576 from (Hordeum vulgare)                                                                                  | 262440_at   | 1.3 |
| hypothetical protein contains similarity to phosphatidylinositol 4-kinase 230 GI:2326227 from [Homo sapiens]                                                    | 262387_s_at | 1.3 |
| betaine aldehyde dehydrogenase, putative similar to betaine aldehyde dehydrogenase GI:2388709 from [Amaranthus hypochondriacus];supported t                     | 262173_at   | 1.3 |
| beta-glucosidase, putative similar to beta-glucosidase GI:5030906 from [Polygonum tinctorium]; supported by cDNA: gi_15146265_gb_AY049274.1_                    | 262118_at   | 1.3 |
| putative heat-shock protein contains Pfam profile: PF00012 Heat shock hsp70 proteins; similar to heat-shock proteins GB:CAA94389, GB:AAD5546                    | 262054_s_at | 1.3 |
| calcium-dependent protein kinase identical to GB:BAA04830 GI:604881 from [Arabidopsis thaliana]; supported by cDNA: gi_15293094_gb_AY0509;                      | 262026_at   | 1.3 |
| glutamate decarboxylase (gad), putative similar to glutamate decarboxylase (gad) GI:294111 from [Petunia hybrida]; supported by cDNA: gi_11849E                 | 261970_at   | 1.3 |
| hypothetical protein predicted by genemark.hmm                                                                                                                  | 261909_at   | 1.3 |
| 4-coumarate:CoA ligase 3 identical to 4-coumarate:CoA ligase 3 GI:5702190 from [Arabidopsis thaliana]; supported by cDNA: gi_5702191_gb_AF10                    | 261907_at   | 1.3 |
| scarecrow-like protein similar to SCARECROW GB:AAB06318 GI:1497987 from [Arabidopsis thaliana]; supported by cDNA: gi_14334475_gb_AY03                          | 261860_at   | 1.3 |
| ABC transporter, putative similar to ABC transporter GI:9279716 from [Arabidopsis thaliana]                                                                     | 261763_at   | 1.3 |
| wall-associated kinase 4, putative similar to wall-associated kinase 4 GI:3355308 from [Arabidopsis thaliana]                                                   | 261402_at   | 1.3 |
| CMP-KDO synthetase, putative similar to GB:CAB89846 from [Zea mays]                                                                                             | 261373_at   | 1.3 |
| unknown protein similar to Glu-tRNA Gln amidotransferase subunit B GB:AAB83965; supported by cDNA: gi_11078539_gb_AF239836.1_AF239836                           | 261307_at   | 1.3 |
| unknown protein ; supported by cDNA: gi_15450835_gb_AY054498.1_                                                                                                 | 261127_at   | 1.3 |
| hypothetical protein contains Pfam profile: PF00534 glycosyl transferases group 1                                                                               | 261138_at   | 1.3 |
| sec14 cytosolic factor, putative similar to SP:P24859 from [Kluyveromyces lactis]                                                                               | 261116_at   | 1.3 |
| unknown protein ; supported by cDNA: gi_16974626_gb_AY060591.1_                                                                                                 | 260989_at   | 1.3 |
| unknown protein similar to unknown protein GB:AAF18609 GI:6598419 from [Arabidopsis thaliana]                                                                   | 260884_at   | 1.3 |
| unknown protein similar to putative cytoskeletal protein GI:1732517 from [Arabidopsis thaliana]; supported by cDNA: gi_1732516_gb_U62745.1_ATL                  | 260638_at   | 1.3 |
| putative zinc protease member of insulinase protein family                                                                                                      | 260554_at   | 1.3 |
| DHHC-type zinc finger protein, putative contains Pfam profile: PF01529: DHHC zinc finger domain                                                                 | 260347_at   | 1.3 |
| putative protein kinase similar to C-terminal region of s-receptor kinases GB:BAA21132, GB:BAA06285 [Brassica rapa]; Pfam HMM hit: Eukaryotic p                 | 260303_at   | 1.3 |
| unknown protein identical to most of OBP32pep protein (fragment) GB:S71212 [Arabidopsis thaliana];supported by full-length cDNA: Ceres:23753.                   | 260304_at   | 1.3 |
| unknown protein                                                                                                                                                 | 260155_at   | 1.3 |
| hypothetical protein predicted by genscan                                                                                                                       | 260087_at   | 1.3 |
| putative chlorophyll A-B binding protein similar to chlorophyll A-B binding protein GB:P12470 [Nicotiana plumbaginifolia]; contains Pfam profile: PF00          | 259970_at   | 1.3 |
| cytosolic factor, putative similar to GI:807956 from [Saccharomyces cerevisiae]; supported by cDNA: gi_15081613_gb_AY048199.1_                                  | 259804_at   | 1.3 |
| unknown protein                                                                                                                                                 | 259767_s_at | 1.3 |



|                                                                                                                                                                         |             |     |
|-------------------------------------------------------------------------------------------------------------------------------------------------------------------------|-------------|-----|
| unknown protein                                                                                                                                                         | 259771_at   | 1.3 |
| putative thioredoxin similar to protein disulfide isomerase precursor GB:P29828 [Medicago sativa]; Pfam HMM hit: Thioredoxins                                           | 259757_at   | 1.3 |
| hypothetical protein contains similarity to invertase inhibitor GB:CAA73333 GI:2765240 from [Nicotiana tabacum]; supported by full-length cDNA: Cere                    | 259616_at   | 1.3 |
| hypothetical protein                                                                                                                                                    | 259633_at   | 1.3 |
| unknown protein                                                                                                                                                         | 259489_at   | 1.3 |
| unknown protein                                                                                                                                                         | 259470_at   | 1.3 |
| (1-4)-beta-mannan endohydrolase precursor, putative similar to (1-4)-beta-mannan endohydrolase precursor GI:9836826 from [Lycopersicon esculentum]                      | 259442_at   | 1.3 |
| protein phosphatase 2A 65 kDa regulatory subunit identical to protein phosphatase 2A 65 kDa regulatory subunit GB:X82002 [Arabidopsis thaliana]                         | 259408_at   | 1.3 |
| unknown protein                                                                                                                                                         | 259292_at   | 1.3 |
| hypothetical protein predicted by genscan                                                                                                                               | 259219_at   | 1.3 |
| beta-glucosidase identical to beta-glucosidase GB:AAC31962 [Arabidopsis thaliana]; supported by cDNA: gi_3420934_gb_AF082157.1_AF082157                                 | 259173_at   | 1.3 |
| transcription initiation factor IIB (TFIIB) identical to ATTFIIB2 GB:CAA84309 [Arabidopsis thaliana]; supported by full-length cDNA: Ceres:38950.                       | 259155_at   | 1.3 |
| putative auxin-independent growth promoter similar to auxin-independent growth promoter GB:A44226 [Nicotiana tabacum]; supported by full-length cDNA: Cere              | 259132_at   | 1.3 |
| putative ribosomal-protein S6 kinase (ATPK19) identical to putative ribosomal-protein S6 kinase (ATPK19) GB:D42061 [Arabidopsis thaliana] (FEBS Lett 357:111-114, 1994) | 258682_at   | 1.3 |
| unknown protein                                                                                                                                                         | 258635_at   | 1.3 |
| unknown protein                                                                                                                                                         | 258316_at   | 1.3 |
| unknown protein ; supported by full-length cDNA: Ceres:141813.                                                                                                          | 258078_at   | 1.3 |
| unknown protein similar to CGI-18 protein GB:AAD27727 [Homo sapiens]                                                                                                    | 258053_at   | 1.3 |
| unknown protein                                                                                                                                                         | 258017_at   | 1.3 |
| ethylene-insensitive 3 (EIN3) identical to GB:AAC49749 from [Arabidopsis thaliana]                                                                                      | 257981_at   | 1.3 |
| mitogen activated protein kinase kinase, putative similar to mitogen activated protein kinase kinase GB:AAC32599 from [Oryza sativa]                                    | 257801_at   | 1.3 |
| CTP-synthetase, putative similar to CTP synthetase GB:U49350 GI:1515356 (Mus musculus)                                                                                  | 257702_at   | 1.3 |
| Expressed protein ; supported by full-length cDNA: Ceres: 22745.                                                                                                        | 257271_at   | 1.3 |
| hemolysin-like protein similar to hemolysin C GB:Q54318 [Brachyspira hyodysenteriae]                                                                                    | 257178_at   | 1.3 |
| unknown protein                                                                                                                                                         | 257092_at   | 1.3 |
| ATPase, putative similar to spastin protein GB:CAB60141 from [Homo sapiens] (Hum. Mol. Genet. (2000) 9, 637-644)                                                        | 257046_at   | 1.3 |
| CLC-b chloride channel protein identical to CLC-b chloride channel protein GB:CAA96058 from [Arabidopsis thaliana] (J. Biol. Chem. 271 (52), 3363-3367, 1996)           | 256751_at   | 1.3 |
| auxin-independent growth promoter, putative similar to GB:A44226 from [Nicotiana tabacum] (Science 258 (5086), 1350-1353 (1992))                                        | 256706_at   | 1.3 |
| unknown protein                                                                                                                                                         | 256542_at   | 1.3 |
| protein kinase, putative contains Pfam profile: PF00069: Eukaryotic protein kinase domain                                                                               | 256366_at   | 1.3 |
| unknown protein ; supported by cDNA: gi_14194136_gb_AF367274.1_AF367274                                                                                                 | 256343_at   | 1.3 |
| unknown protein ; supported by full-length cDNA: Ceres:10857.                                                                                                           | 256301_at   | 1.3 |
| calreticulin (crt1) identical to calreticulin (crt1) GI:2052379 [Arabidopsis thaliana]; supported by cDNA: gi_2052378_gb_U66343.1_ATU66343                              | 256216_at   | 1.3 |
| ubiquitin-specific protease 6 (UBP6), putative similar to GI:11993465; supported by full-length cDNA: Ceres:116145.                                                     | 256179_at   | 1.3 |
| fructose-2,6-bisphosphatase, putative similar to fructose-2,6-bisphosphatase GI:8572069 from [Arabidopsis thaliana]; supported by cDNA: gi_13096                        | 256036_at   | 1.3 |
| carbamoylphosphate synthetase, putative similar to carbamoylphosphate synthetase GI:6552726 from [Medicago sativa]; supported by cDNA: gi_14                            | 256002_at   | 1.3 |
| hypothetical protein predicted by genscan+                                                                                                                              | 255891_at   | 1.3 |
| hypothetical protein predicted by genscan and genefinder; similar to EGADJ50981YBR228W                                                                                  | 255866_at   | 1.3 |
| putative steroid dehydrogenase ; supported by cDNA: gi_16226672_gb_AF428460.1_AF428460                                                                                  | 255797_at   | 1.3 |
| predicted protein of unknown function                                                                                                                                   | 255681_at   | 1.3 |
| hypothetical protein                                                                                                                                                    | 255573_at   | 1.3 |
| putative sugar transporter                                                                                                                                              | 255294_at   | 1.3 |
| putative homeotic protein ; supported by cDNA: gi_15983371_gb_AF424560.1_AF424560                                                                                       | 255277_at   | 1.3 |
| predicted protein of unknown function                                                                                                                                   | 255181_at   | 1.3 |
| putative protein proteins of this bac                                                                                                                                   | 255087_at   | 1.3 |
| COP1 like protein photomorphogenesis repressor COP1 - Arabidopsis thaliana, PIR2:T01112                                                                                 | 254966_at   | 1.3 |
| KI domain interacting kinase 1 -like protein KI domain interacting kinase 1 - Zea mays, PID:g2735017                                                                    | 254870_at   | 1.3 |
| hypothetical protein supported by full-length cDNA: Ceres:151415.                                                                                                       | 254844_at   | 1.3 |
| putative protein phospho-N-acetylmuramoyl-pentapeptide-transferase, Haemophilus influenzae, Pir2:A64185                                                                 | 254662_at   | 1.3 |
| initiation factor-2Bepsilon-like protein initiation factor-2Be, Rattus norvegicus, PATCHX:G924597                                                                       | 254664_at   | 1.3 |
| putative protein IEF SSP 9502, Homo sapiens, PATCHX:G177765                                                                                                             | 254593_s_at | 1.3 |
| putative protein gene F4P9.34 chromosome II BAC F4P9, Arabidopsis thaliana                                                                                              | 254508_at   | 1.3 |
| berberine bridge enzyme - like protein ; supported by cDNA: gi_14194126_gb_AF367269.1_AF367269                                                                          | 254447_at   | 1.3 |
| putative protein predicted protein, Arabidopsis thaliana, PATCHX:G2494119; supported by full-length cDNA: Ceres:106883.                                                 | 254427_at   | 1.3 |
| gamma-glutamylcysteine synthetase ; supported by cDNA: gi_15912188_gb_AY056372.1_AY056372                                                                               | 254270_at   | 1.3 |
| putative protein receptor protein kinase, Ipomoea trifida                                                                                                               | 254247_at   | 1.3 |
| argininosuccinate synthase -like protein argininosuccinate synthase, Aquifex aeolicus, PIR2:B70398                                                                      | 254134_at   | 1.3 |
| putative protein proliferating-cell nucleolar antigen P120 -Homo sapiens, PIR2:A48168                                                                                   | 253975_at   | 1.3 |
| putative aconitase Pumpkin mRNA for aconitase, Cucurbita sp., PID:g868003; supported by cDNA: gi_15215803_gb_AY050431.1_AY050431                                        | 253954_at   | 1.3 |
| putative protein                                                                                                                                                        | 253897_at   | 1.3 |
| pelota (PEL1)                                                                                                                                                           | 253882_at   | 1.3 |
| SOF1 protein-like protein SOF1 (involved in rRNA processing) protein-yeast; supported by cDNA: gi_13937178_gb_AF372943.1_AF372943                                       | 253777_at   | 1.3 |
| putative protein predicted proteins, Arabidopsis thaliana; supported by full-length cDNA: Ceres:19314.                                                                  | 253789_at   | 1.3 |
| putative protein ; supported by full-length cDNA: Ceres:12759.                                                                                                          | 253752_at   | 1.3 |
| X-Pro dipeptidase - like protein (fragment) X-Pro dipeptidase, Homo sapiens, PIR2:A32454                                                                                | 253704_at   | 1.3 |
| putative protein kinase serine/threonine protein kinase, Arabidopsis thaliana, PID:D1006875; supported by cDNA: gi_14334745_gb_AY035046.1_AY035046                      | 253550_at   | 1.3 |
| putative protein deubiquitinating enzyme (DUB-1), Mus musculus, PIR2:JC6133                                                                                             | 253542_at   | 1.3 |
| predicted protein predicted protein on BAC T06B20; Arabidopsis thaliana chromosome II; PATCHX:G1946371                                                                  | 253501_at   | 1.3 |
| putative protein peptidyl-prolyl cis-trans isomerase, Schizosaccharomyces pombe, gb:SPBC16H5                                                                            | 253415_at   | 1.3 |
| P-Protein - like protein P-Protein precursor, Solanum tuberosum, gb:Z99770; supported by cDNA: gi_14596024_gb_AY042800.1_AY042800                                       | 253387_at   | 1.3 |
| putative protein ; supported by cDNA: gi_13605598_gb_AF361625.1_AF361625                                                                                                | 253388_at   | 1.3 |
| gamma-VPE (vacuolar processing enzyme) ; supported by cDNA: gi_13877794_gb_AF370160.1_AF370160                                                                          | 253358_at   | 1.3 |
| putative protein hemolysin, 38K, Synechocystis sp., Pir2:S75595                                                                                                         | 253351_at   | 1.3 |
| putative protein B subunit of propionyl-CoA carboxylase, Mycobacterium tuberculosis, PATCHX:E290075; supported by cDNA: gi_14423377_gb_AF370160.1_AF370160              | 253279_at   | 1.3 |
| Nonclathrin coat protein gamma - like protein coat protein gamma-cop, Bos primigenius                                                                                   | 253231_at   | 1.3 |
| putative squalene synthase non-consensus GC donor splice site at exon 3, squalene synthase 2 (SQS2), Arabidopsis thaliana; supported by cDNA: Cere                      | 253206_at   | 1.3 |
| putative protein predicted proteins, Arabidopsis thaliana                                                                                                               | 253107_at   | 1.3 |
| putative protein KIAA0776 protein, Homo sapiens, EMBL:AB018319; supported by cDNA: gi_14334491_gb_AY034937.1_AY034937                                                   | 252513_at   | 1.3 |
| FtsH protease, putative contains similarity to FtsH protease GI:13183728 from [Medicago sativa]                                                                         | 252449_at   | 1.3 |
| putative protein                                                                                                                                                        | 252431_at   | 1.3 |
| ubiquitin-specific protease 26 (UBP26) similar to GI:11993492; RNA binding protein - Homo sapiens, EMBL:AB016089 (N-terminus), several ubiquitin                        | 252275_at   | 1.3 |
| hypothetical protein ; supported by cDNA: gi_13507562_gb_AF360347.1_AF360347                                                                                            | 252276_at   | 1.3 |
| putative protein putative protein - Drosophila melanogaster, EMBL:AF132172                                                                                              | 252239_at   | 1.3 |
| putative disease resistance protein                                                                                                                                     | 252126_at   | 1.3 |
| putative protein ; supported by cDNA: gi_14517539_gb_AY039605.1_AY039605                                                                                                | 252134_at   | 1.3 |
| putative protein senescence-associated protein 12 - Hemerocallis hybrid cultivar, EMBL:AF082032; supported by cDNA: gi_15215687_gb_AY05037                              | 252099_at   | 1.3 |
| RNA helicase -like protein RNA helicase, Mus musculus, PIR:149731; supported by cDNA: gi_15982880_gb_AY057548.1_AY057548                                                | 251989_at   | 1.3 |

|                                                                                                                                                             |             |     |
|-------------------------------------------------------------------------------------------------------------------------------------------------------------|-------------|-----|
| putative protein unknown protein At2g40800 - Arabidopsis thaliana, EMBL:AC007660                                                                            | 251685_at   | 1.3 |
| squamosa promoter binding protein-like 12                                                                                                                   | 251450_at   | 1.3 |
| guanine nucleotide exchange factor - like protein guanine nucleotide exchange factor, Homo sapiens, EMBL:AF111162                                           | 251390_at   | 1.3 |
| putative protein putative protein F26O13.260 - Arabidopsis thaliana, EMBL:AL133452                                                                          | 251333_at   | 1.3 |
| ARGININE/SERINE-RICH SPLICING FACTOR RSP31 ; supported by cDNA: gi_16612267_gb_AF439831.1_AF439831                                                          | 251242_at   | 1.3 |
| putative protein hypothetical protein At2g28380 - Arabidopsis thaliana, EMBL:AC006283                                                                       | 251233_at   | 1.3 |
| translation releasing factor RF-1 -like protein translation releasing factor RF-1, Synechocystis sp., PIR:S76914                                            | 251193_at   | 1.3 |
| hypothetical protein RNA polymerase II CTD phosphatase (CTDP1), Homo sapiens, EMBL:AF154115                                                                 | 251134_at   | 1.3 |
| putative protein predicted protein, Arabidopsis thaliana; supported by cDNA: gi_13430449_gb_AF360137.1_AF360137                                             | 251015_at   | 1.3 |
| putative protein ; supported by cDNA: gi_14190430_gb_AF378893.1_AF378893                                                                                    | 250970_at   | 1.3 |
| putative protein ; supported by cDNA: gi_1019903_gb_U37587.1_ATU37587                                                                                       | 250899_at   | 1.3 |
| putative protein contains similarity to unknown protein (pir J070614); supported by cDNA: gi_14334951_gb_AY035149.1_                                        | 250824_at   | 1.3 |
| putative protein similar to unknown protein (pir T01270)                                                                                                    | 250742_at   | 1.3 |
| DnaJ-like protein ; supported by cDNA: gi_15810414_gb_AY056246.1_                                                                                           | 250755_at   | 1.3 |
| putative protein contains similarity to zinc finger protein;supported by full-length cDNA: Ceres:3542.                                                      | 250736_s_at | 1.3 |
| putative protein SF16 protein, pollen specific - Helianthus annuus, PIR:T13992                                                                              | 250613_at   | 1.3 |
| calnexin homolog                                                                                                                                            | 250625_at   | 1.3 |
| putative protein p100 co-activator - Mus musculus, EMBL:AB021491                                                                                            | 250626_at   | 1.3 |
| transcription factor OBF4                                                                                                                                   | 250463_at   | 1.3 |
| putative protein predicted protein, Arabidopsis thaliana                                                                                                    | 250274_at   | 1.3 |
| sigma-like factor (gb)AAC97954.1) ; supported by cDNA: gi_3983259_gb_AF101075.1_AF101075                                                                    | 250255_at   | 1.3 |
| putative protein CGI-67, Homo sapiens, EMBL:AF151825                                                                                                        | 250175_at   | 1.3 |
| putative protein p53 inducible protein PIR121, Homo sapiens, EMBL:AF160973                                                                                  | 250041_at   | 1.3 |
| MAP kinase -like protein ATPMK9, Arabidopsis thaliana, EMBL:AB038694                                                                                        | 249964_at   | 1.3 |
| alkaline/neutral invertase ; supported by cDNA: gi_15912342_gb_AY056449.1_                                                                                  | 249898_at   | 1.3 |
| putative protein mDj10, Mus musculus, EMBL:AB028860; supported by cDNA: gi_15450366_gb_AY052284.1_                                                          | 249613_at   | 1.3 |
| unknown protein ;supported by full-length cDNA: Ceres:101366.                                                                                               | 249456_at   | 1.3 |
| nuclear pore protein -like nuclear pore protein gp210 precursor, rat, PIR:S04921                                                                            | 249354_at   | 1.3 |
| disease resistance protein-like                                                                                                                             | 249264_s_at | 1.3 |
| maize crp1 protein-like                                                                                                                                     | 249247_at   | 1.3 |
| unknown protein                                                                                                                                             | 249134_at   | 1.3 |
| electron transfer flavoprotein beta-subunit-like ;supported by full-length cDNA: Ceres:120707.                                                              | 249158_at   | 1.3 |
| cullin ;supported by full-length cDNA: Ceres:101723.                                                                                                        | 248882_at   | 1.3 |
| putative protein contains similarity to (pir T14814)                                                                                                        | 248901_at   | 1.3 |
| eukaryotic release factor 1 homolog (gb)AAA91169.1) ; supported by cDNA: gi_15215862_gb_AY050462.1_                                                         | 248749_at   | 1.3 |
| putative protein contains similarity to unknown protein (pir T01052)                                                                                        | 248616_at   | 1.3 |
| putative protein contains similarity to unknown protein (emb CAB87278.1)                                                                                    | 248393_at   | 1.3 |
| putative protein similar to unknown protein (gb)AAD38661.1); supported by cDNA: gi_13430647_gb_AF360236.1_AF360236                                          | 248305_at   | 1.3 |
| pyruvate kinase ;supported by full-length cDNA: Ceres:109919.                                                                                               | 248283_at   | 1.3 |
| FtsH protease, putative similar to ATP-dependent metalloprotease FtsH1 GI:3600100 from [Mus musculus]                                                       | 248303_at   | 1.3 |
| putative protein similar to unknown protein (gb)AAF54217.1)                                                                                                 | 247993_at   | 1.3 |
| unknown protein                                                                                                                                             | 248005_at   | 1.3 |
| pyruvate kinase ;supported by full-length cDNA: Ceres:31580.                                                                                                | 247989_at   | 1.3 |
| serine/threonine protein kinase ; supported by cDNA: gi_13249118_gb_AF295665.1_AF295665                                                                     | 247820_at   | 1.3 |
| aspartyl aminopeptidase - like protein aspartyl aminopeptidase, Homo sapiens, EMBL:AF005050;supported by full-length cDNA: Ceres:126533.                    | 247624_at   | 1.3 |
| cleavage stimulation factor 50K chain cleavage stimulation factor 50K chain Homo sapiens, PIR:A45142;supported by full-length cDNA: Ceres:1172              | 247609_at   | 1.3 |
| pyrophosphate-dependent phosphofructo-1-kinase - like protein pyrophosphate-dependent phosphofructo-1-kinase, Prunus armeniaca, EMBL:U932                   | 247534_at   | 1.3 |
| quinone oxidoreductase - like protein quinone oxidoreductase homolog, Vigna unguiculata, PIR:T11672;supported by full-length cDNA: Ceres:3719;              | 247513_at   | 1.3 |
| putative protein contains similarity to protein kinase                                                                                                      | 247309_at   | 1.3 |
| phosphatidylinositol 4-kinase (emb CAB37928.1)                                                                                                              | 247321_s_at | 1.3 |
| putative protein similar to unknown protein (dbj BAA96220.1); supported by full-length cDNA: Ceres: 16835.                                                  | 247295_at   | 1.3 |
| nuclear protein-like                                                                                                                                        | 247271_at   | 1.3 |
| beta-ureidopropionase                                                                                                                                       | 247275_at   | 1.3 |
| poly(A)-binding protein II-like ; supported by cDNA: gi_14423493_gb_AF386984.1_AF386984                                                                     | 247173_at   | 1.3 |
| acyl-CoA oxidase (gb)AAC13497.1) ; supported by cDNA: gi_3044211_gb_AF057043.1_AF057043                                                                     | 247176_at   | 1.3 |
| putative protein contains similarity to RING3 protein                                                                                                       | 247147_at   | 1.3 |
| unknown protein ; supported by cDNA: gi_14334479_gb_AY034931.1_                                                                                             | 247114_at   | 1.3 |
| unknown protein                                                                                                                                             | 247063_at   | 1.3 |
| floral homeotic protein apetala2-like ;supported by full-length cDNA: Ceres:4623.                                                                           | 247041_at   | 1.3 |
| nodulin - like protein nodulin, Glycine max, EMBL:AF065435                                                                                                  | 246927_s_at | 1.3 |
| eukaryotic translation initiation factor - like protein eukaryotic translation initiation factor 3, Nicotiana tabacum, EMBL:Y11996; supported by cDNA: g    | 246865_s_at | 1.3 |
| SAR DNA-binding protein - like SAR DNA-binding protein-1, garden pea, PIR:T06377                                                                            | 246809_s_at | 1.3 |
| putative protein kinesin heavy chain-like protein, potato, PIR:T07397                                                                                       | 246759_at   | 1.3 |
| signal recognition particle 54 kDa protein 2 (SRP54), putative similar to signal recognition particle 54 kDa protein 2 (SRP54) GI:556901 from [Lycopersicon | 246628_at   | 1.3 |
| putative protein HR21spA protein involved in DNA double-strand break repair - Mus musculus, EMBL:X98293                                                     | 246500_at   | 1.3 |
| TOM (target of myb1) -like protein TOM1, Mus musculus, EMBL:MUS6972;supported by full-length cDNA: Ceres:1330.                                              | 246421_at   | 1.3 |
| phosphoglucosyltransferase-like protein phosphoglucosyltransferase, chloroplast - Spinacia oleracea, EMBL:X75898; supported by cDNA: gi_16974561_gb_AY0     | 246412_at   | 1.3 |
| putative protein hexamer-binding protein HEXBP - Leishmania major, PIR:A47156                                                                               | 246328_at   | 1.3 |
| splicing factor-like protein                                                                                                                                | 246257_at   | 1.3 |
| ids4-like protein ids-4 protein - Hordeum vulgare, PIR:T05905;supported by full-length cDNA: Ceres:32843.                                                   | 246071_at   | 1.3 |
| putative protein predicted proteins from various species;supported by full-length cDNA: Ceres:10217.                                                        | 246017_at   | 1.3 |
| putative protein predicted proteins - different species                                                                                                     | 245936_at   | 1.3 |
| putative protein protein phosphatase-1 regulatory subunit 7 alpha2 - Homo sapiens, EMBL:AF067136;supported by full-length cDNA: Ceres:110392                | 245938_at   | 1.3 |
| putative protein CD2 cytoplasmic domain binding protein - Homo sapiens, EMBL:AF104222;supported by full-length cDNA: Ceres:13887.                           | 245887_at   | 1.3 |
| unknown protein similar to unknown protein GB:AAC36170 GI:3608137 from [Arabidopsis thaliana]; supported by cDNA: gi_11044956_emb_AJ2515                    | 245796_at   | 1.3 |
| hyoscyamine 6-dioxygenase hydroxylase, putative similar to hyoscyamine 6-dioxygenase hydroxylase GB:P24397 from [Hyoscyamus niger];supported                | 245756_at   | 1.3 |
| lysophospholipase homolog, putative similar to lysophospholipase homolog GI:2801536 from [Oryza sativa]; supported by cDNA: gi_15028212_gb_                 | 245734_at   | 1.3 |
| unknown protein                                                                                                                                             | 245744_at   | 1.3 |
| calcium lipid binding protein - like GC donor splice site at exon 3; supported by cDNA: gi_16604592_gb_AY059741.1_                                          | 245702_at   | 1.3 |
| UFD1 like protein ; supported by full-length cDNA: Ceres: 207652.                                                                                           | 245313_at   | 1.3 |
| HSP like protein ; supported by cDNA: gi_15293148_gb_AY051008.1_                                                                                            | 245293_at   | 1.3 |
| putative protein similarity to ALR - Homo sapiens-contains EST gb:Aa39558600                                                                                | 245237_at   | 1.3 |
| unknown protein ; supported by cDNA: gi_14334431_gb_AY034907.1_                                                                                             | 245116_at   | 1.3 |
| putative beta-1,3-glucanase ;supported by full-length cDNA: Ceres:95083.                                                                                    | 245039_at   | 1.3 |
| hypothetical protein predicted by genscan+                                                                                                                  | 261463_at   | 1.3 |
| transfactor, putative similar to transfactor GI:4519671 from [Nicotiana tabacum]; supported by cDNA: gi_15010721_gb_AY045662.1_                             | 262921_at   | 1.2 |
| putative protein similar to unknown protein (gb)AAB63610.1)                                                                                                 | 248213_at   | 1.2 |

|                                                                                                                                                        |             |     |
|--------------------------------------------------------------------------------------------------------------------------------------------------------|-------------|-----|
| unknown protein ; supported by cDNA: gi_13877620_gb_AF370511.1_AF370511                                                                                | 267577_at   | 1.2 |
| unknown protein ; supported by cDNA: gi_13430537_gb_AF360181.1_AF360181                                                                                | 267513_at   | 1.2 |
| putative glucosyltransferase                                                                                                                           | 267300_at   | 1.2 |
| ubiquitin activating enzyme 1 (UBA1) identical to GB:U80808                                                                                            | 267301_at   | 1.2 |
| FtsH protease (VAR2) identical to zinc dependent protease VAR2 GI:7650138 from [Arabidopsis thaliana]                                                  | 267196_at   | 1.2 |
| unknown protein                                                                                                                                        | 267132_at   | 1.2 |
| putative ABC transporter related to multi drug resistance proteins and P-glycoproteins                                                                 | 266964_at   | 1.2 |
| plasma membrane proton ATPase (PMA) identical to GB:M24107; supported by cDNA: gi_166745_gb_M24107.1_ATHHATPA                                          | 266939_at   | 1.2 |
| remorin identical to GB:M25268, a non-specific DNA binding protein; may be involved in intercellular communication; supported by cDNA: gi_15028:       | 266897_at   | 1.2 |
| unknown protein ;supported by full-length cDNA: Ceres:40283.                                                                                           | 266413_at   | 1.2 |
| putative beta-amylase                                                                                                                                  | 266357_at   | 1.2 |
| putative ligand-gated ion channel subunit ; supported by cDNA: gi_5759099_gb_AF170494.1_AF170494                                                       | 266337_at   | 1.2 |
| putative pumilio/Mpt5 family RNA-binding protein                                                                                                       | 266284_at   | 1.2 |
| putative glutathione S-transferase ; supported by cDNA: gi_15450462_gb_AY052332.1_                                                                     | 266181_at   | 1.2 |
| putative helicase ; supported by cDNA: gi_16648974_gb_AY059857.1_                                                                                      | 266122_at   | 1.2 |
| putative MYB family transcription factor                                                                                                               | 265700_at   | 1.2 |
| hypothetical protein predicted by genscan                                                                                                              | 265728_at   | 1.2 |
| 50S ribosomal protein L4 ;supported by full-length cDNA: Ceres:156843.                                                                                 | 265594_at   | 1.2 |
| putative cyclic nucleotide and calmodulin-regulated ion channel protein                                                                                | 265544_at   | 1.2 |
| putative WD-40 repeat protein similar to TUP1(GB:AF079369); supported by cDNA: gi_13605894_gb_AF367346.1_AF367346                                      | 265259_at   | 1.2 |
| putative PHD-type zinc finger protein                                                                                                                  | 265225_at   | 1.2 |
| unknown protein ; supported by cDNA: gi_1669598_dbj_D88746.1_D88746                                                                                    | 265059_at   | 1.2 |
| T-complex chaperonin protein , epsilon subunit identical to GB:O04450, similar to ESTs gb R29812, emb Z38124, gb AA297087, gb R29812, gb T14           | 265010_at   | 1.2 |
| U2 snRNP auxiliary factor, large subunit, putative similar to GI:3850823 from (Nicotiana plumbaginifolia) (J. Biol. Chem. 273 (51), 34603-34610 (199   | 264922_s_at | 1.2 |
| RNA polymerase subunit identical to RNA polymerase subunit GI:514324 from [Arabidopsis thaliana]; supported by cDNA: gi_14423463_gb_AF3869             | 264924_at   | 1.2 |
| unknown protein                                                                                                                                        | 264878_at   | 1.2 |
| putative protochlorophyllide reductase similar to protochlorophyllide reductase precursor; similar to ESTs gb R30630, gb T46162, emb Z26728, gb A      | 264839_at   | 1.2 |
| unknown protein                                                                                                                                        | 264698_at   | 1.2 |
| shaggy-like protein kinase, kappa identical to A. thaliana AtK-1 (gb X79279)                                                                           | 264686_at   | 1.2 |
| unknown protein similar to putative inositol polyphosphate 5 -phosphatase GI:3212848 from [Arabidopsis thaliana]                                       | 264683_at   | 1.2 |
| hypothetical protein contains similarity to caltractin GI:3688162 from [Arabidopsis thaliana]                                                          | 264628_at   | 1.2 |
| putative protein kinase contains a protein kinase domain profile (PDOC00100)                                                                           | 264621_at   | 1.2 |
| unknown protein Similar to Caenorhabditis unknown protein T03F1.1 (gb U88169                                                                           | 264570_at   | 1.2 |
| putative phytochrome A similar to GB:AAA21351; supported by cDNA: gi_14517371_gb_AY039520.1_                                                           | 264508_at   | 1.2 |
| multi-drug resistance protein Strong similarity to MRP-like ABC transporter gb U92650 from A. thaliana and canalicular multi-drug resistance protein ; | 264330_at   | 1.2 |
| coatomer alpha subunit, putative similar to coatomer alpha subunit GI:4567286 from [Arabidopsis thaliana]                                              | 264309_at   | 1.2 |
| gamma glutamyl hydrolase, putative similar to gamma glutamyl hydrolase GI:1680711 from [Glycine max];supported by full-length cDNA: Ceres:413          | 264300_at   | 1.2 |
| unknown protein                                                                                                                                        | 264218_at   | 1.2 |
| hypothetical protein predicted by genemark.hmm                                                                                                         | 264224_at   | 1.2 |
| CRK1 protein, putative similar to CRK1 protein GI:7671528 from [Beta vulgaris]; supported by cDNA: gi_13877618_gb_AF370510.1_AF370510                  | 264193_at   | 1.2 |
| Expressed protein ; supported by full-length cDNA: Ceres: 42267.                                                                                       | 264163_at   | 1.2 |
| unknown protein                                                                                                                                        | 264063_at   | 1.2 |
| putative DnaJ protein ;supported by full-length cDNA: Ceres:10312.                                                                                     | 264002_at   | 1.2 |
| unknown protein ; supported by cDNA: gi_15450787_gb_AY054474.1_                                                                                        | 263954_at   | 1.2 |
| putative phosphatidylinositol/phosphatidylcholine transfer protein                                                                                     | 263749_at   | 1.2 |
| putative NADPH dependent mannose 6-phosphate reductase ; supported by full-length cDNA: Ceres: 21730.                                                  | 263758_s_at | 1.2 |
| hypothetical protein predicted by genefinder;supported by full-length cDNA: Ceres:119045.                                                              | 263538_at   | 1.2 |
| molybdopterin synthase (CNX2) ;supported by full-length cDNA: Ceres:33192.                                                                             | 263472_at   | 1.2 |
| En/Spm-like transposon protein related to En/Spm transposon family of maize                                                                            | 263352_at   | 1.2 |
| putative RING zinc finger protein ; supported by cDNA: gi_13265496_gb_AF324691.2_AF324691                                                              | 263325_at   | 1.2 |
| zinc finger protein, putative similar to zinc finger protein GI:3618316 from [Oryza sativa];supported by full-length cDNA: Ceres:34830.                | 263128_at   | 1.2 |
| hypothetical protein predicted by genscan and genefinder                                                                                               | 263101_s_at | 1.2 |
| unknown protein                                                                                                                                        | 263104_at   | 1.2 |
| unknown protein ; supported by cDNA: gi_16930680_gb_AF436824.1_AF436824                                                                                | 263050_at   | 1.2 |
| putative mitotic control protein dis3 ; supported by cDNA: gi_15982744_gb_AY057479.1_                                                                  | 263077_at   | 1.2 |
| conserved hypothetical protein                                                                                                                         | 263037_at   | 1.2 |
| putative ATP-dependent RNA helicase similar to GB:AAB88651, similar to human U5 snRNP-specific 200kD protein, gi 3255965 and yeast pre-mR              | 262800_at   | 1.2 |
| putative pyrophosphate-dependent phosphofructokinase alpha subunit similar to GB:AAC67587 from [Citrus X paradisi] and GB:Q41140 from [Ricinu          | 262806_at   | 1.2 |
| unknown protein similar to elongation factor G SP:P34811 [Glycine max (Soybean)]; supported by cDNA: gi_14532623_gb_AY039936.1_                        | 262645_at   | 1.2 |
| unknown protein EST gb N65467 comes from this gene;supported by full-length cDNA: Ceres:30239.                                                         | 262598_at   | 1.2 |
| hypothetical protein predicted by genemark.hmm                                                                                                         | 262562_at   | 1.2 |
| putative ubiquitin-conjugating enzyme First 212 a.a. are 41% identical to Ubiquitin-Conjugating Enzyme E2 [Saccharomyces cerevisiae] (gi 480374).      | 262537_s_at | 1.2 |
| alanine--tRNA ligase, putative similar to alanine--tRNA ligase GB:S32671 from [Arabidopsis thaliana]                                                   | 262468_at   | 1.2 |
| unknown protein                                                                                                                                        | 262430_s_at | 1.2 |
| hypothetical protein predicted by genemark.hmm                                                                                                         | 262221_at   | 1.2 |
| xylosidase, putative similar to xylosidase GI:2102655 from [Aspergillus niger]                                                                         | 262181_at   | 1.2 |
| dynamin-like protein similar to dynamin GB:AAA37324 GI:487857 from [Mus musculus]; supported by cDNA: gi_15146178_gb_AY049230.1_                       | 262077_at   | 1.2 |
| myrosinase precursor, putative                                                                                                                         | 261884_at   | 1.2 |
| transcriptional regulator, putative similar to transcriptional regulator GI:4836767 [Zea mays]                                                         | 261891_at   | 1.2 |
| UDP glucose:flavonoid 3-o-glucosyltransferase, putative similar to UDP glucose:flavonoid 3-o-glucosyltransferase GB:AAB81683 GI:2564114 from [         | 261804_at   | 1.2 |
| unknown protein similar to hypothetical protein GB:CAA20583 GI:3549672 from [Arabidopsis thaliana]                                                     | 261682_at   | 1.2 |
| unknown protein ; supported by cDNA: gi_15028128_gb_AY046014.1_                                                                                        | 261520_at   | 1.2 |
| hypothetical protein predicted by genemark.hmm; supported by cDNA: gi_16041649_gb_AF355754.2_AF355754                                                  | 261444_at   | 1.2 |
| unknown protein contains similarity to set protein GI:338038 from [Homo sapiens];supported by full-length cDNA: Ceres:27467.                           | 261406_at   | 1.2 |
| unknown protein ; supported by cDNA: gi_15912328_gb_AY056442.1_                                                                                        | 261354_at   | 1.2 |
| unknown protein ; supported by full-length cDNA: Ceres: 117183.                                                                                        | 261269_at   | 1.2 |
| heat shock factor protein hsf8, putative predicted by genemark.hmm; supported by cDNA: gi_15028376_gb_AY045991.1_                                      | 261206_at   | 1.2 |
| unknown protein                                                                                                                                        | 261064_at   | 1.2 |
| unknown protein                                                                                                                                        | 260629_at   | 1.2 |
| putative ATP-dependent RNA helicase ; supported by cDNA: gi_16323191_gb_AY057700.1_                                                                    | 260532_at   | 1.2 |
| putative alpha-amylase similar to alpha-amylase GB:AA91884 [Solanum tuberosum]; supported by cDNA: gi_15215737_gb_AY050398.1_                          | 260412_at   | 1.2 |
| putative protein kinase contains Pfam profile: PF00069 Eukaryotic protein kinase domain                                                                | 260419_at   | 1.2 |
| hypothetical protein contains Pfam profile: PF01535 Domain of unknown function                                                                         | 260331_at   | 1.2 |
| hypothetical protein ;supported by full-length cDNA: Ceres:108322.                                                                                     | 260301_at   | 1.2 |
| hypothetical protein contains Pfam profile: PF01344 Kelch motif                                                                                        | 260214_at   | 1.2 |
| F-box protein FKF1/ADO3, AIFBX2a identical to FKF1 GI:6960305 and Adagio 3 GI:13487072 from [Arabidopsis thaliana]                                     | 259990_s_at | 1.2 |
| hypothetical protein predicted by genefinder, contains protein kinase domain                                                                           | 259950_at   | 1.2 |

putative phenylalanyl-tRNA synthetase beta-subunit; PheHB similar to phenylalanyl-tRNA synthetase beta-subunit (PheHB) GB:5032011 [Homo sap 259920\_at 1.2  
putative ribophorin I (dolichyl-diphosphooligosaccharide-protein glycosyltransferase) similar to ribophorin I (dolichyl-diphosphooligosaccharide-protein 259983\_at 1.2  
beta-glucosidase, putative identical to Gl:6651430 from [Arabidopsis thaliana]; supported by cDNA: gi\_14532461\_gb\_AY039855.1\_ 259640\_at 1.2  
CONSTANS family zinc finger protein, putative contains Pfam profile: PF01760: CONSTANS family zinc finger; supported by cDNA: gi\_14335053\_g 259595\_at 1.2  
cathepsin B-like cysteine protease, putative similar to cathepsin B-like cysteine proteinase Gl:609175 from [Nicotiana rustica] 259441\_at 1.2  
trehalose-6-phosphate synthase, putative similar to trehalose-6-phosphate synthase Gl:4468259 from [Pichia angusta] 259393\_at 1.2  
hypothetical protein predicted by genscan+ 259385\_at 1.2  
putative adenylsulfate kinase similar to GB:S47640 [Arabidopsis thaliana] 259339\_at 1.2  
putative mRNA capping enzyme, RNA guanylyltransferase contains similarity to mRNA capping enzyme GB:BAA25198 from [Homo sapiens] 259202\_at 1.2  
putative phosphoribosylanthranilate transferase similar to phosphoribosylanthranilate transferase GB:CAA16616 [Arabidopsis thaliana], phosphoribc 259222\_at 1.2  
unknown protein est hit, predicted by genscan 259190\_at 1.2  
lysyl-tRNA synthetase identical to lysyl-tRNA synthetase; LysRS GB:AAD17333 [Arabidopsis thaliana]; supported by cDNA: gi\_4325323\_gb\_AF125f 259069\_at 1.2  
heat-shock protein (At-hsc70-3) identical to (At-hsc70-3) (cytosolic Hsp70) GB:CAA76606 [Arabidopsis thaliana]; supported by cDNA: gi\_15292924\_ 258979\_at 1.2  
putative ribosome recycling factor similar to ribosome recycling factor gene (RRF) GB:BAA76865 [Thermus thermophilus] 258996\_at 1.2  
hypothetical protein similar to hypothetical protein GB:P40055 [Saccharomyces cerevisiae], Pfam HMM hit: WD domain, G-beta repeats 258965\_at 1.2  
unknown protein similar to hypothetical proteins: GB:P51281 [Chloroplast Porphyra purpurea], GB:BAA16982 [Synechocystis sp], GB:P49540 [Odor 258925\_at 1.2  
unknown protein N-terminus similar to unknown protein GB:AAD25613 [Arabidopsis thaliana]; supported by cDNA: gi\_16604638\_gb\_AY059764.1\_ 258926\_s\_at 1.2  
unknown protein predicted by genscan, multiple est matches; supported by full-length cDNA: Ceres: 97694. 258883\_at 1.2  
unknown protein similar to RNA helicase GB:AAF03534 258863\_at 1.2  
putative RNA helicase similar to RNA helicase involved in rRNA processing GB:6321267 from [Saccharomyces cerevisiae], contains DEAD and DE/ 258701\_at 1.2  
putative GTPase contains Pfam profile: PF01926 GTPase of unknown function 258545\_at 1.2  
fatty acid multifunctional protein (AMFP2) identical to fatty acid multifunctional protein (AMFP2) GB:AF123254 [Arabidopsis thaliana] (fatty acid beta 258555\_at 1.2  
ubiquitin-specific protease 25 (UBP25) similar to Gl:11993490; supported by cDNA: gi\_11993489\_gb\_AF302673.1\_AF302673 258372\_at 1.2  
unknown protein contains RanBP1 domain; supported by full-length cDNA: Ceres:108414. 258313\_at 1.2  
unknown protein ; supported by cDNA: gi\_13430465\_gb\_AF360145.1\_AF360145 258259\_s\_at 1.2  
unknown protein similar to unknown protein GB:AAD14522 from [Arabidopsis thaliana] 258228\_at 1.2  
FKBP-type peptidyl-prolyl cis-trans isomerases, putative contains Pfam profile: PF00254 FKBP-type peptidyl-prolyl cis-trans isomerases 258175\_at 1.2  
hypothetical protein predicted by genemark.hmm; supported by full-length cDNA: Ceres:25758. 258104\_at 1.2  
unknown protein 257973\_at 1.2  
formin-like protein AHF1 identical to formin-like protein AHF1 GB:AAF14548 from [Arabidopsis thaliana]; supported by cDNA: gi\_6503009\_gb\_AF17f 257912\_at 1.2  
seed maturation protein, putative similar to seed maturation protein (PM36) GB:AAD51624 [Glycine max]; supported by full-length cDNA: Ceres:316f 257888\_at 1.2  
unknown protein 257803\_at 1.2  
cytochrome P450, putative contains Pfam profile: PF00067 cytochrome P450 257625\_at 1.2  
9-cis-epoxycarotenoid dioxygenase, putative similar to 9-cis-epoxycarotenoid dioxygenase GB:AAF26356 [Phaseolus vulgaris]; supported by cDNA: 257280\_at 1.2  
unknown protein ; supported by cDNA: gi\_15294249\_gb\_AF410316.1\_AF410316 257253\_at 1.2  
Expressed protein ; supported by full-length cDNA: Ceres: 93242. 257193\_at 1.2  
major latex protein, putative similar to major latex protein type1 GB:CAA63026 [Arabidopsis thaliana]; supported by full-length cDNA: Ceres: 8841. 256880\_at 1.2  
unknown protein 256485\_at 1.2  
adenylosuccinate lyase - like protein adenylosuccinate lyase - Haemophilus influenzae 256461\_s\_at 1.2  
lipoxygenase, putative similar to lipoxygenase Gl:1407704 from [Solanum tuberosum]; supported by cDNA: gi\_289202\_gb\_L04637.1\_ATHLIPOXY 256321\_at 1.2  
unknown protein ; supported by cDNA: gi\_14334837\_gb\_AY035092.1\_ 256310\_at 1.2  
unknown protein 256271\_at 1.2  
unknown protein 256258\_at 1.2  
unknown protein 256220\_at 1.2  
NADP-specific glutamate dehydrogenase, putative similar to NADP-specific glutamate dehydrogenase (NADP-GDH) SP:P28724 [Giardia lamblia 256174\_at 1.2  
55 kDa B regulatory subunit of phosphatase 2A nearly identical to 55 kDa B regulatory subunit of phosphatase 2A [Arabidopsis thaliana] Gl:710330; 256187\_at 1.2  
unknown protein ; supported by full-length cDNA: Ceres:23788. 255957\_at 1.2  
predicted protein ; supported by full-length cDNA: Ceres: 11106. 255668\_s\_at 1.2  
hypothetical protein 255611\_at 1.2  
cathepsin B-like cysteine protease, putative similar to cathepsin B-like cysteine proteinase Gl:609175 from [Nicotiana rustica]; contains an unusually 255590\_at 1.2  
putative CHP-rich zinc finger protein similar to several A. thaliana CHP-rich proteins 255546\_at 1.2  
hypothetical protein identical to T10M13.21 ; supported by cDNA: gi\_15293058\_gb\_AY050963.1\_ 255509\_at 1.2  
hypothetical protein ; supported by full-length cDNA: Ceres:6957. 255456\_at 1.2  
putative protein phosphatase regulatory subunit 255421\_at 1.2  
predicted protein of unknown function ; supported by cDNA: gi\_15810532\_gb\_AY056305.1\_ 255332\_at 1.2  
putative calcium dependent protein kinase 255292\_s\_at 1.2  
putative component of vesicle-mediated transport similar to N. tabacum N-ethylmaleimide sensitive fusion protein, GenBank accession number D86/ 255308\_at 1.2  
putative thioredoxin ; supported by cDNA: gi\_16648848\_gb\_AY058202.1\_ 255279\_at 1.2  
putative protein Homo sapiens deubiquitinating enzyme UnpEL (UNP).PID:g2656141; supported by cDNA: gi\_15450766\_gb\_AY054463.1\_ 254984\_s\_at 1.2  
putative protein a 162 kDa component of a multi-protein complex phosphorylated by Src - Mus musculus.PID:g1205976; supported by cDNA: gi\_12f 254873\_at 1.2  
putative protein 254778\_at 1.2  
N-acetylmethine deacetylase-like protein, fragment N-acetylmethine deacetylase (AODD) - Dictyostelium discoideum, PID:G763048 254690\_at 1.2  
putative protein transcription initiation factor IID beta chain, fruit fly, Pir2:B49453; supported by cDNA: gi\_15293300\_gb\_AY051084.1\_ 254463\_at 1.2  
3-hydroxyisobutyrate dehydrogenase -like protein 3-hydroxyisobutyrate dehydrogenase, Rattus norvegicus, Pir:A32867; supported by full-length cDN 254445\_at 1.2  
tubulin beta-9 chain ; supported by full-length cDNA: Ceres:36891. 254446\_at 1.2  
putative protein 254417\_at 1.2  
putative NADPH quinone oxidoreductase Pig3 Homo sapiens, PID:G2754812; supported by full-length cDNA: Ceres:4621. 254393\_at 1.2  
DNA-directed RNA polymerase (EC 2.7.7.6) II second largest chain 254368\_at 1.2  
predicted protein PVPR3 protein, Phaenolus vulgaris, PATCHX:G169363; supported by full-length cDNA: Ceres:13832. 254276\_at 1.2  
putative protein various predicted proteins, Arabidopsis thaliana; supported by full-length cDNA: Ceres:20902. 254081\_at 1.2  
protein phosphatase 2C-like protein protein phosphatase 2C-fission yeast, PIR2:S54297; supported by cDNA: gi\_16604584\_gb\_AY059737.1\_ 253780\_at 1.2  
putative protein WREBP-1, Nicotiana tabacum, EMBL:AB017693 253784\_at 1.2  
putative protein predicted protein. Arabidopsis thaliana; supported by cDNA: gi\_15293152\_gb\_AY051010.1\_ 253739\_at 1.2  
putative protein SNF7 protein - Saccharomyces cerevisiae, PIR2:S52590; supported by full-length cDNA: Ceres:7471. 253735\_at 1.2  
putative protein heat shock protein 101 - Triticum aestivum, PID:g4558484 253614\_at 1.2  
predicted protein cation transport protein ChaC, Escherichia coli, PIR2:G64868; supported by full-length cDNA: Ceres:39740. 253522\_at 1.2  
putative protein cellulose synthase, Agrobacterium tumefaciens, PIR2:I39714 253533\_at 1.2  
putative protein RING-finger protein - Lotus japonicus, PIR2:S49446; supported by cDNA: gi\_15983461\_gb\_AF424605.1\_AF424605 253539\_at 1.2  
predicted protein RegA gene, Dictyostelium discoideum, PATCHX:G1405368 253500\_at 1.2  
aspartate aminotransferase ; supported by full-length cDNA: Ceres:33414., Ceres:103854. 253481\_at 1.2  
putative protein ATAC98, Arabidopsis thaliana; supported by cDNA: gi\_15292682\_gb\_AY050775.1\_ 253465\_at 1.2  
glycine hydroxymethyltransferase (EC 2.1.2.1) - like protein glycine hydroxymethyltransferase, Pisum sativum, PIR2:A42906; supported by cDNA: g 253438\_at 1.2  
putative protein beta transducin-like protein, Podospora anserina, gb:L28125; supported by cDNA: gi\_11141604\_gb\_AF277458.1\_AF277458 253443\_at 1.2  
putative poly(A) polymerase polynucleotide adenylyltransferase (EC 2.7.7.19) class I - bovine, PIR2:S17875 253399\_at 1.2  
putative protein hypothetical protein F17H15.20 Arabidopsis thaliana chromosome II BAC F17H15, PID:g3643606 253401\_at 1.2  
putative protein hypothetical protein, Synechocystis sp., PIR2:S76307; supported by cDNA: gi\_14596178\_gb\_AY042877.1\_ 253235\_at 1.2  
putative serine/threonine protein kinase Daucus carota somatic embryogenesis receptor-like kinase, gb:U93048 253239\_at 1.2

|                                                                                                                                                  |             |     |
|--------------------------------------------------------------------------------------------------------------------------------------------------|-------------|-----|
| Homeodomain - like protein similarity to homeotic protein BEL1, Arabidopsis thaliana, PIR2:A57632                                                | 253247_at   | 1.2 |
| arginine decarboxylase SPE2 ; supported by cDNA: gi_14517491_gb_AY039581.1_                                                                      | 253203_at   | 1.2 |
| putative protein membrane-associated salt-inducible protein, Nicotiana tabacum, PIR:T02047                                                       | 253209_at   | 1.2 |
| cyclophilin - like protein cyclophilin, Arabidopsis thaliana, PID:g2443755                                                                       | 253216_at   | 1.2 |
| protein kinase - like protein serine/threonine-specific protein kinase APK1, Arabidopsis thaliana, PIR2:S28615                                   | 253147_at   | 1.2 |
| heat shock protein 70 like protein dnaK-type molecular chaperone PHSP1 - Pisum sativum, PID:g20835                                               | 253013_at   | 1.2 |
| glycosyltransferase like protein alpha-1,3-mannosyl-glycoprotein beta-1,2-N-acetylglucosaminyltransferase (EC 2.4.1.101) I - rat, PIR2:JC2076    | 253035_at   | 1.2 |
| putative protein ubiquitin fusion degradation protein - Schizosaccharomyces pombe, PID:e1132723                                                  | 252947_at   | 1.2 |
| putative protein NLS receptor - Oryza sativa, PID:d1032113                                                                                       | 252948_at   | 1.2 |
| putative protein unknown mRNA, Homo sapiens, AF091072                                                                                            | 252968_at   | 1.2 |
| putative ubiquitin-dependent proteolytic protein ubiquitin fusion-degradation protein - Mus musculus, PID:g1654348; supported by cDNA: gi_169304 | 252931_at   | 1.2 |
| myo-inositol-1-phosphate synthase ;supported by full-length cDNA: Ceres:1978.                                                                    | 252863_at   | 1.2 |
| putative protein br-1 protein (NITRIC OXIDE SYNTHASE) - Helix pomatia, PID:e234055                                                               | 252410_at   | 1.2 |
| H-protein promoter binding factor-2a ; supported by full-length cDNA: Ceres:113639.                                                              | 252429_at   | 1.2 |
| hypothetical protein                                                                                                                             | 252400_at   | 1.2 |
| aldehyde dehydrogenase (NAD+)-like protein aldehyde dehydrogenase (NAD+) 2A precursor (mitochondrial), Nicotiana tabacum; supported by cDN       | 252372_at   | 1.2 |
| hypothetical protein                                                                                                                             | 252346_at   | 1.2 |
| hypothetical protein ;supported by full-length cDNA: Ceres:124275.                                                                               | 252321_at   | 1.2 |
| putative protein predicted proteins, Arabidopsis thaliana                                                                                        | 251946_at   | 1.2 |
| fructokinase - like protein fructokinase, Lycopersicon esculentum, EMBL:LEU62329                                                                 | 251935_at   | 1.2 |
| putative protein TATA-binding protein-binding protein, ABT1 - Mus musculus, EMBL:AB021860                                                        | 251690_at   | 1.2 |
| protein kinase-like protein Pto kinase interactor 1 - Lycopersicon esculentum, EMBL:U28007; supported by cDNA: gi_15451117_gb_AY054639.1_        | 251494_at   | 1.2 |
| hypothetical protein                                                                                                                             | 251460_at   | 1.2 |
| putative protein carbonyl reductase (NADPH) - Rattus norvegicus, PIR:JC5285; supported by cDNA: gi_15028054_gb_AY045884.1_                       | 251309_at   | 1.2 |
| serine/threonine-protein kinase-like protein serine/threonine kinase UNC51.2 - Mus musculus, EMBL:AF145922; supported by cDNA: gi_14334751_      | 251273_at   | 1.2 |
| putative protein hypothetical protein At2g38190 - Arabidopsis thaliana, EMBL:AC003028                                                            | 251086_at   | 1.2 |
| signal recognition particle 54CP protein precursor ; supported by cDNA: gi_15293130_gb_AY050999.1_                                               | 250884_at   | 1.2 |
| putative protein NAC2, Arabidopsis thaliana, EMBL:AF201456; supported by cDNA: gi_6456750_gb_AY201456.1_AF201456                                 | 250849_at   | 1.2 |
| cytochrom P450 - like protein cytochrome P450 77A3p, Glycine max., PIR:T05948; supported by full-length cDNA: Ceres:7867.                        | 250859_at   | 1.2 |
| putative protein predicted proteins, Arabidopsis thaliana; supported by full-length cDNA: Ceres:34592.                                           | 250861_at   | 1.2 |
| putative protein contains similarity to unknown protein (gb AAF19567.1)                                                                          | 250809_at   | 1.2 |
| SET-domain protein-like ; supported by cDNA: gi_13517742_gb_AF344444.1_AF344444                                                                  | 250817_at   | 1.2 |
| meiotic check point regulator-like protein                                                                                                       | 250787_at   | 1.2 |
| CDK5 activator-binding protein-like                                                                                                              | 250700_at   | 1.2 |
| transcription factor HBP-1b (gb)AAD24395.1)                                                                                                      | 250655_at   | 1.2 |
| myosin heavy chain-like protein ; supported by cDNA: gi_1732514_gb_U62744.1_ATU62744                                                             | 250548_at   | 1.2 |
| cleft lip and palate associated transmembrane protein-like                                                                                       | 250522_at   | 1.2 |
| putative protein NLI-interacting factor isoform T1, Gallus gallus, EMBL:AF189773; supported by full-length cDNA: Ceres:151766.                   | 250298_at   | 1.2 |
| auxin responsive - like protein Nt-gh3 deduced protein, Nicotiana tabacum, EMBL:AF123503                                                         | 250293_s_at | 1.2 |
| transaldolase - like protein transaldolase, Solanum tuberosum, EMBL:U95923; supported by full-length cDNA: Ceres:32114.                          | 250234_at   | 1.2 |
| putative protein asporony-associated protein C, Chlamydomonas reinhardtii, EMBL:AF195243; supported by full-length cDNA: Ceres:93845.            | 250186_at   | 1.2 |
| cinnamoyl CoA reductase - like protein cinnamoyl CoA reductase, Populus tremuloides, EMBL:AF217958; supported by full-length cDNA: Ceres:172     | 250149_at   | 1.2 |
| unknown protein                                                                                                                                  | 249808_at   | 1.2 |
| putative protein contains similarity to general transcription factor IIIC, polypeptide 5                                                         | 249735_at   | 1.2 |
| unknown protein                                                                                                                                  | 249100_at   | 1.2 |
| protein kinase-like protein                                                                                                                      | 248853_at   | 1.2 |
| Expressed protein ; supported by full-length cDNA: Ceres: 13184.                                                                                 | 248813_at   | 1.2 |
| putative protein strong similarity to unknown protein (gb)AAF56406.1)                                                                            | 248583_at   | 1.2 |
| ubiquitin activating enzyme ; supported by full-length cDNA: Ceres:26820.                                                                        | 248523_s_at | 1.2 |
| MtN3-like protein ; supported by full-length cDNA: Ceres:36264.                                                                                  | 248467_at   | 1.2 |
| fumarate hydratase ; supported by cDNA: gi_15529146_gb_AY052197.1_                                                                               | 248461_s_at | 1.2 |
| phosphoglucomutase (emb)CAB64725.1) ; supported by cDNA: gi_12004569_gb_AF216580.1_AF216580                                                      | 248380_at   | 1.2 |
| arginine/serine-rich splicing factor RSP41 homolog ; supported by cDNA: gi_13877816_gb_AF370171.1_AF370171                                       | 248369_at   | 1.2 |
| putative protein contains similarity to unknown protein (gb)AAF64546.1); supported by cDNA: gi_14596026_gb_AY042801.1_                           | 248176_at   | 1.2 |
| SGP1 monomeric G-protein (emb)CAB54517.1)                                                                                                        | 248132_at   | 1.2 |
| pyruvate decarboxylase (gb)AAB16855.1)                                                                                                           | 248138_at   | 1.2 |
| DNA topoisomerase I                                                                                                                              | 248109_at   | 1.2 |
| nucleolar protein-like                                                                                                                           | 248036_at   | 1.2 |
| transcription factor-like; similar to CH6 and COP9 complex subunit 6 ; supported by cDNA: gi_15809662_gb_AY048692.1_                             | 248009_at   | 1.2 |
| peroxisomal targeting signal type 1 receptor                                                                                                     | 248010_at   | 1.2 |
| putative protein similar to unknown protein (ref)NP_004732.1); supported by full-length cDNA: Ceres:11265.                                       | 247942_at   | 1.2 |
| putative protein predicted proteins, Drosophila melanogaster and Arabidopsis thaliana                                                            | 247841_at   | 1.2 |
| unknown protein                                                                                                                                  | 247859_at   | 1.2 |
| putative protein predicted proteins, Arabidopsis thaliana                                                                                        | 247770_at   | 1.2 |
| putative protein predicted proteins, Arabidopsis thaliana                                                                                        | 247698_at   | 1.2 |
| putative protein contains similarity to DNA-binding protein; supported by full-length cDNA: Ceres:112281.                                        | 247430_at   | 1.2 |
| putative protein similar to unknown protein (sp)P54122)                                                                                          | 247385_at   | 1.2 |
| unknown protein                                                                                                                                  | 247273_at   | 1.2 |
| DNA binding protein TGA1a homolog ; supported by full-length cDNA: Ceres:31032.                                                                  | 247199_at   | 1.2 |
| putative protein contains similarity to ATP binding protein associated with cell differentiation; supported by full-length cDNA: Ceres:2489.     | 247075_at   | 1.2 |
| putative protein similar to unknown protein (gb)AAB71479.1)                                                                                      | 247062_at   | 1.2 |
| SKP1 interacting partner 2 (SKIP2) identical to SKP1 interacting partner 2 GI:10716949 from [Arabidopsis thaliana]                               | 247033_at   | 1.2 |
| formin-like protein                                                                                                                              | 246995_at   | 1.2 |
| unknown protein                                                                                                                                  | 246957_at   | 1.2 |
| putative protein predicted protein, Oryza sativa                                                                                                 | 246892_at   | 1.2 |
| protein phosphatase - like protein phosphatase-2C, Mesembryanthemum crystallinum, AF075579                                                       | 246868_at   | 1.2 |
| long-chain-fatty-acid-CoA ligase-like protein long-chain-fatty-acid-CoA ligase - Brassica napus, EMBL:Z72152                                     | 246789_at   | 1.2 |
| replication factor C - like replication factor C 38K chain, Homo sapiens, PIR:T09573                                                             | 246738_at   | 1.2 |
| formate dehydrogenase (FDH) ; supported by full-length cDNA: Ceres:7530.                                                                         | 246595_at   | 1.2 |
| putative protein ; supported by full-length cDNA: Ceres:22994.                                                                                   | 246486_at   | 1.2 |
| putative protein SART-1 protein - Homo sapiens, PIR:T00034                                                                                       | 246447_at   | 1.2 |
| putative protein predicted protein, Drosophila melanogaster, EMBL:AE003450                                                                       | 246469_at   | 1.2 |
| putative protein cisplatin resistance-associated overexpressed protein - Homo sapiens, EMBL:AB034205; supported by cDNA: gi_15450598_gb_AY       | 246436_at   | 1.2 |
| putative protein sequence in GenBank Accession Number AC002330                                                                                   | 246298_at   | 1.2 |
| hypothetical protein                                                                                                                             | 246281_at   | 1.2 |
| step II splicing factor - like protein ; supported by cDNA: gi_15912280_gb_AY056418.1_                                                           | 246221_at   | 1.2 |
| T-complex protein 1, beta subunit T-COMPLEX PROTEIN 1, BETA SUBUNIT, Homo sapiens, EMBL:AF026293; supported by full-length cDNA: Ceri            | 246191_at   | 1.2 |

|                                                                                                                                                         |             |     |
|---------------------------------------------------------------------------------------------------------------------------------------------------------|-------------|-----|
| putative protein predicted proteins, Homo sapiens                                                                                                       | 246066_at   | 1.2 |
| Pspzf zinc finger protein - like DNA binding zinc finger protein (Pspzf), Pisum sativum, EMBL:AB018422                                                  | 246012_at   | 1.2 |
| homoserine dehydrogenase-like protein thrA bifunctional enzyme - Escherichia coli, PIR:B64720;supported by full-length cDNA: Ceres:123335.              | 246027_at   | 1.2 |
| chaperonin precursor, putative similar to chaperonin precursor GI:806807 from [Pisum sativum]                                                           | 245876_at   | 1.2 |
| receptor serine/threonine kinase PR5K, putative similar to receptor serine/threonine kinase PR5K GI:1235680 from [Arabidopsis thaliana]                 | 245760_s_at | 1.2 |
| Expressed protein ; supported by cDNA: gi_535587_gb_L36113.1_ATHATJ                                                                                     | 245686_at   | 1.2 |
| putative phosphocholine cytidyltransferase                                                                                                              | 245533_at   | 1.2 |
| hypothetical protein                                                                                                                                    | 245501_at   | 1.2 |
| cysteine proteinase contains similarity to papain-like cysteine proteinase isoform I GI:7381219 from [Ipomoea batatas]                                  | 245483_at   | 1.2 |
| apetala2 domain TINY like protein                                                                                                                       | 245445_at   | 1.2 |
| F-box protein family, AIFBL4 contains similarity to grr1 GI:2407790 from [Glycine max];supported by full-length cDNA: Ceres:100411.                     | 245344_at   | 1.2 |
| putative Na <sup>+</sup> /Ca <sup>2+</sup> antiporter ; supported by cDNA: gi_6492236_gb_AF109178.1_AF109178                                            | 245127_at   | 1.2 |
| ubiquitin-specific protease 5 (UBP5), putative similar to GI:6648604; supported by cDNA: gi_6648603_gb_AF048705.1_AF048705                              | 245100_at   | 1.2 |
| PSII low MW protein                                                                                                                                     | 244974_at   | 1.2 |
| ribosomal protein S15                                                                                                                                   | 244938_at   | 1.2 |
| unknown protein                                                                                                                                         | 257377_at   | 1.2 |
| hypothetical protein predicted by genscan                                                                                                               | 257534_at   | 1.2 |
| putative exonuclease contains zinc-finger C2H2-type domain; similar to X.laevis XPMC2 protein (XPMC2 prevents mitotic catastrophe in fission yeas       | 265767_at   | 1.2 |
| putative squamosa-promoter binding protein 2 similar to GB:CAB56577;supported by full-length cDNA: Ceres:42666.                                         | 264444_at   | 1.1 |
| unknown protein ESTs gb R90323, gb R90338, gb Z25504 and gb AA651448 come from this gene                                                                | 262576_at   | 1.1 |
| receptor protein kinase, putative contains Pfam profiles: PF00069 Eukaryotic protein kinase domain, PF00560 Leucine Rich Repeat                         | 261552_at   | 1.1 |
| unknown protein                                                                                                                                         | 261168_at   | 1.1 |
| flavonol 3-O-glucosyltransferase, putative similar to flavonol 3-O-glucosyltransferase GB:Q40287 from [Manihot esculenta]                               | 261048_at   | 1.1 |
| unknown protein                                                                                                                                         | 258356_at   | 1.1 |
| putative protein predicted protein, Arabidopsis thaliana;supported by full-length cDNA: Ceres:114412.                                                   | 251554_at   | 1.1 |
| disease resistance protein                                                                                                                              | 249724_at   | 1.1 |
| unknown protein ; supported by cDNA: gi_15450620_gb_AY052678.1_                                                                                         | 267468_at   | 1.1 |
| Expressed protein ; supported by full-length cDNA: Ceres: 114879.                                                                                       | 267309_at   | 1.1 |
| putative casein kinase II catalytic (alpha) subunit ;supported by full-length cDNA: Ceres:38084.                                                        | 267257_at   | 1.1 |
| DNA-(apurinic or apyrimidinic site) lyase (ARP) identical to GB:X76912                                                                                  | 267099_at   | 1.1 |
| putative glycine dehydrogenase                                                                                                                          | 266892_at   | 1.1 |
| putative ligand-gated ion channel protein                                                                                                               | 266782_at   | 1.1 |
| putative helicase ; supported by cDNA: gi_15027926_gb_AY045820.1_                                                                                       | 266679_at   | 1.1 |
| copia-like retroelement pol polyprotein ; supported by cDNA: gi_15028176_gb_AY045911.1_                                                                 | 266698_at   | 1.1 |
| putative poly(A) polymerase ; supported by cDNA: gi_14532699_gb_AY039974.1_                                                                             | 266659_at   | 1.1 |
| putative flavonol 3-O-glucosyltransferase ;supported by full-length cDNA: Ceres:29796.                                                                  | 266643_s_at | 1.1 |
| putative transportin                                                                                                                                    | 266523_at   | 1.1 |
| putative zinc-finger protein (B-box zinc finger domain)                                                                                                 | 266514_at   | 1.1 |
| hypothetical protein predicted by genscan;supported by full-length cDNA: Ceres:20820.                                                                   | 266450_s_at | 1.1 |
| putative elongation factor                                                                                                                              | 266407_at   | 1.1 |
| hypothetical protein                                                                                                                                    | 266304_at   | 1.1 |
| putative methionyl-tRNA synthetase ; supported by cDNA: gi_14334467_gb_AY034925.1_                                                                      | 266057_at   | 1.1 |
| putative cytochrome P450 identical to GB:D78604; supported by cDNA: gi_15450907_gb_AY054534.1_                                                          | 266000_at   | 1.1 |
| unknown protein ;supported by full-length cDNA: Ceres:9001.                                                                                             | 265961_at   | 1.1 |
| unknown protein                                                                                                                                         | 265810_at   | 1.1 |
| unknown protein                                                                                                                                         | 265760_at   | 1.1 |
| 26S proteasome subunit 4 ;supported by full-length cDNA: Ceres:36815.                                                                                   | 265595_at   | 1.1 |
| unknown protein                                                                                                                                         | 265201_at   | 1.1 |
| unknown protein ESTs gb H76594 and gb H76252 come from this gene                                                                                        | 265217_s_at | 1.1 |
| hypothetical protein contains similarity to high-glucose-regulated protein 8 GB:AAF08813 GI:6449083 from [Homo sapiens]; supported by cDNA: gi_         | 265078_at   | 1.1 |
| unknown protein Contains similarity to pre-mRNA processing protein PRP39 gb L29224 from S. cerevisiae. ESTs gb R64908 and gb T88158, gb N3              | 265036_at   | 1.1 |
| hypothetical protein predicted by genscan                                                                                                               | 264828_at   | 1.1 |
| putative violaxanthin de-epoxidase precursor (U44133) similar to EST gb N37612; supported by cDNA: gi_1465734_gb_U44133.1_ATU44133                      | 264799_at   | 1.1 |
| putative ligand-gated ion channel protein Similar to Arabidopsis putative ion-channel PID:g2262157 (gb AC002329); supported by cDNA: gi_571318(         | 264587_at   | 1.1 |
| unknown protein ; supported by cDNA: gi_13430435_gb_AF360130.1_AF360130                                                                                 | 264548_at   | 1.1 |
| hypothetical protein similar to hypothetical protein GB:S51583                                                                                          | 264515_at   | 1.1 |
| unknown protein similar to T cell receptor beta chain CDR3 (gi 3064031); similar to nucleoporin NUP145 (sp P49687 N145_YEAST); similar to ESTs          | 264456_at   | 1.1 |
| putative chromodomain-helicase-DNA-binding protein similarity to Mi-2, Homo sapiens, GB:X86691; supported by cDNA: gi_6318929_gb_AF18557;               | 264384_at   | 1.1 |
| trehalose-6-phosphate synthase, putative similar to trehalose-6-phosphate synthase GI:297792 from [Kluyveromyces lactis]                                | 264246_at   | 1.1 |
| putative RNA polymerase sigma-70 factor ; supported by cDNA: gi_7209639_dbj_AB029916.1_AB029916                                                         | 263846_at   | 1.1 |
| unknown protein ;supported by full-length cDNA: Ceres:35274.                                                                                            | 263802_at   | 1.1 |
| unknown protein ; supported by cDNA: gi_16649002_gb_AY059871.1_                                                                                         | 263774_at   | 1.1 |
| unknown protein ESTs gb T20589, gb T04648, gb AA597906, gb T04111, gb R84180, gb R65428, gb T44439, gb T76570, gb R90004, gb T45020, (                  | 263709_at   | 1.1 |
| putative purple acid phosphatase precursor                                                                                                              | 263553_at   | 1.1 |
| hypothetical protein predicted by genscan and genefinder; supported by cDNA: gi_14596224_gb_AY042900.1_                                                 | 263556_at   | 1.1 |
| hypothetical protein predicted by genscan                                                                                                               | 263471_at   | 1.1 |
| putative glucosyltransferase ; supported by cDNA: gi_15810476_gb_AY056277.1_                                                                            | 263477_at   | 1.1 |
| putative importin (nuclear transport factor ) protein                                                                                                   | 263448_at   | 1.1 |
| subtilisin-like serine protease AIR3 almost identical to subtilisin-like protease AIR3 GI:4218991 from [Arabidopsis thaliana], missing 18 aa at C-termi | 263406_at   | 1.1 |
| unknown protein ; supported by cDNA: gi_15810336_gb_AY056207.1_                                                                                         | 263326_at   | 1.1 |
| hypothetical protein putative acetyl-CoA carboxylase (partial) dbj BAA07012; similar to ESTs gb AW144916.1, gb AI993440.1, gb T14234, gb H7602          | 263192_at   | 1.1 |
| hypothetical protein predicted by genefinder; supported by cDNA: gi_14423545_gb_AF387010.1_AF387010                                                     | 263075_at   | 1.1 |
| putative alanine aminotransferase similar to alanine aminotransferase GB:BAA77260 GI:4730884 from [Oryza sativa]; supported by cDNA: gi                 | 262988_at   | 1.1 |
| Dhpl1-like protein similar to Dhpl1 protein GB:BAA04601 GI:496393 from [Schizosaccharomyces pombe]; supported by cDNA: gi_11875627_gb_AF2               | 262923_at   | 1.1 |
| hypothetical protein contains similarity to 30S ribosomal protein S5 GI:6969105 from [Campylobacter jejuni]; supported by cDNA: gi_14334893_gb_A        | 262880_at   | 1.1 |
| unknown protein ; supported by cDNA: gi_14596044_gb_AY042810.1_                                                                                         | 262845_at   | 1.1 |
| putative inosine-5-monophosphate dehydrogenase strong similarity to gb L34684 inosine monophosphate dehydrogenase (IMPDH) from Arabidopsis              | 262754_at   | 1.1 |
| TPR-repeat protein contains multiple TPR domains: Pfam profile: PF00515                                                                                 | 262691_at   | 1.1 |
| hypothetical protein Is a member of the PFJ01177 Aspartate-glutamate racemase family. EST gb T43554 comes from this gene                                | 262582_at   | 1.1 |
| auxilin-like protein similar to GB:CAB40994 from [Arabidopsis thaliana], EST gb AA042488 comes from this gene                                           | 262493_at   | 1.1 |
| DNA binding protein, putative similar to DNA binding protein GI:1899187 from [Nicotiana tabacum]                                                        | 262433_s_at | 1.1 |
| hypothetical protein predicted by genemark.hmm                                                                                                          | 262130_at   | 1.1 |
| hypothetical protein predicted by genemark.hmm;supported by full-length cDNA: Ceres:116121.                                                             | 262111_at   | 1.1 |
| unknown protein ; supported by cDNA: gi_6520232_dbj_AB028233.1_AB028233                                                                                 | 262080_at   | 1.1 |
| splicing factor Prp8, putative similar to splicing factor Prp8 GI:3661610 from [Homo sapiens]                                                           | 262068_at   | 1.1 |
| putative coatomer protein complex, subunit beta 2 (beta prime) similar to coatomer protein complex, subunit beta 2 (beta prime) GB:4758032 (Homc        | 262051_at   | 1.1 |
| ubiquitin, putative similar to poly-ubiquitin GB:AAC13691 GI:3047318 from [Pyricularia grisea]                                                          | 261947_at   | 1.1 |

ATP citrate-lyase, putative similar to ATP citrate-lyase GI:9229902 from [Ciona intestinalis];supported by full-length cDNA: Ceres:36439. 261833\_at 1.1

unknown protein ; supported by cDNA: gi\_15451153\_gb\_AY054657.1\_ 261795\_at 1.1

unknown protein contains similarity to actin-related protein GB:BAA74577 GI:4218064 from [Homo sapiens];supported by full-length cDNA: Ceres:38 261672\_at 1.1

unknown protein ;supported by full-length cDNA: Ceres:111522. 261686\_at 1.1

unknown protein similar to unknown protein GB:AAF24950 GI:6693024 from [Arabidopsis thaliana]; supported by cDNA: gi\_13605566\_gb\_AF36160 261651\_at 1.1

hypothetical protein similar to guanine nucleotide exchange factor-like protein GB:CAB82690 GI:7329696 from [Arabidopsis thaliana] 261621\_at 1.1

unknown protein 261615\_at 1.1

acyl CoA thioesterase, putative similar to HIV-Nef associated acyl CoA thioesterase GB:AAB71665 GI:2318125 from [Homo sapiens] 261560\_at 1.1

K Efflux antiporter KEA1 identical to GB:AAD01191 GI:4101473 from [ Arabidopsis thaliana]; supported by cDNA: gi\_4101472\_gb\_AF003382.1\_AFO 261536\_at 1.1

unknown protein ; supported by cDNA: gi\_14532543\_gb\_AY039896.1\_ 261519\_at 1.1

unknown protein contains DNA-J domain; supported by cDNA: gi\_15028270\_gb\_AY046050.1\_ 261458\_at 1.1

hypothetical protein predicted by genemark.hmm 261238\_at 1.1

Eukaryotic peptide chain release factor subunit 1 (ERF1) identical to Eukaryotic peptide chain release factor subunit 1 (ERF1) SP:P35614 ((In) Plant 261204\_s\_at 1.1

GSH-dependent dehydroascorbate reductase 1, putative similar to GB:BAA90672 from [Oryza sativa]; supported by full-length cDNA: Ceres: 15122.261149\_s\_at 1.1

unknown protein ; supported by cDNA: gi\_14334841\_gb\_AY035094.1\_ 261107\_at 1.1

hypothetical protein predicted by genemark.hmm;supported by full-length cDNA: Ceres:34178. 261026\_at 1.1

unknown protein similar to unknown protein GB:AAF34848 GI:6997186 from [Arabidopsis thaliana] 261023\_at 1.1

s-adenosylmethionine synthetase identical to s-adenosylmethionine synthetase GB:P23686 from [Arabidopsis thaliana]; supported by full-length cDN 260913\_at 1.1

hypothetical protein similar to hypothetical protein GB:AAB67625 GI:2342727 from [Arabidopsis thaliana]; supported by full-length cDNA: Ceres: 300 260840\_at 1.1

chloroplast inner envelope protein, putative similar to chloroplast inner envelope protein GB:CAA92823 GI:1495768 from [Pisum sativum] 260815\_at 1.1

hypothetical protein predicted by genemark.hmm 260627\_at 1.1

putative protein kinase contains a protein kinase domain profile (PDOC00100) 260562\_at 1.1

phosphatidylinositol-4-phosphate 5-kinase isolog 260466\_at 1.1

unknown protein ;supported by full-length cDNA: Ceres:27109. 260444\_at 1.1

unknown protein ; supported by full-length cDNA: Ceres: 96657. 260356\_at 1.1

putative protein kinase similar to C-terminal region of s-receptor kinase precursor GB:JQ1677 [Brassica napus]; Pfam HMM hit: Eukaryotic protein kir 260362\_at 1.1

putative ABC transporter contains Pfam profile: PF00005 ABC transporters; similar to TAP1 protein (transporter of processed antigen) GB:AAD5303 260308\_at 1.1

unknown protein 260273\_at 1.1

putative N-terminal acetyltransferase similar to N-TERMINAL ACETYLTRANSFERASE GB:P12945 from (Saccharomyces cerevisiae) 260282\_at 1.1

unknown protein ;supported by full-length cDNA: Ceres:269548. 260137\_at 1.1

putative protein kinase contains Pfam profile: PF00069 eukaryotic protein kinase domain 260073\_at 1.1

endoplasmic reticulum alpha-mannosidase, putative similar to GI:5579331 from [Homo sapiens]; supported by cDNA: gi\_15450803\_gb\_AY054482.1 260029\_at 1.1

ARE1-like protein similar to ARE1 GB:CAA11566 [Rattus norvegicus], Sacm21 GB:AAC69899 [Mus musculus]; unknown function 259939\_s\_at 1.1

putative translation initiation factor IF-2 similar to translation initiation factor IF-2 GB:P39730 [Saccharomyces cerevisiae] 259872\_at 1.1

unknown protein ;supported by full-length cDNA: Ceres:9231. 259765\_at 1.1

lysophospholipase isolog, putative similar to lysophospholipase isolog GI:1931639 from (Arabidopsis thaliana);supported by full-length cDNA: Ceres 259708\_at 1.1

unknown protein ;supported by full-length cDNA: Ceres:25703. 259639\_at 1.1

hypothetical protein contains similarity to 1-phosphatidylinositol-4-phosphate 5-kinase(ATPIP5K1) GI:3702691 from [Arabidopsis thaliana] 259426\_at 1.1

hypothetical protein gene model predicted by gencan and genefinder; supported by cDNA: gi\_13430665\_gb\_AF360245.1\_AF360245 259330\_at 1.1

unknown protein similar to hect domain and RLD 2 GB:NP\_004658 [Homo sapiens] 259334\_at 1.1

hypothetical protein predicted by gencan 259295\_at 1.1

putative aminopeptidase similar to X-prolyl aminopeptidase GB:NP\_006514 from [Homo sapiens] 259296\_at 1.1

putative cell division related protein similar to GlcA (required for asymmetric cell division) GB:AAD26632 [Volvox carteri f. nagariensis] 259284\_at 1.1

protein phosphatase 2C (PP2C) identical to protein phosphatase 2C (PP2C) GB:P49598 [Arabidopsis thaliana] 259231\_at 1.1

homeobox-leucine zipper protein HAT5 (HD-ZIP protein 5) (HD-ZIP protein ATHB-1) identical to homeobox-leucine zipper protein HAT5 (HD-ZIP pro 259165\_at 1.1

unknown protein similar to unknown protein GB:BAA24863 [Homo sapiens], unknown protein GB:BAA20831 [Homo sapiens], unknown protein GB:/ 259118\_at 1.1

putative cysteine synthase similar to cysteine synthase GB:BAA78562 [Arabidopsis thaliana];supported by full-length cDNA: Ceres:37566. 259094\_at 1.1

putative cytochrome P450 similar to cytochrome P450 89A2 GB:Q42602 [Arabidopsis thaliana]; supported by cDNA: gi\_15983413\_gb\_AF424581.1\_ 259058\_at 1.1

hypothetical protein predicted by gencan 258844\_at 1.1

unknown protein predicted by gencan, multiple est matches; supported by cDNA: gi\_15027888\_gb\_AY045801.1\_ 258801\_at 1.1

hypothetical protein similar to plant IF-like protein, GB:AAD09217;supported by full-length cDNA: Ceres:110680. 258744\_at 1.1

putative nonspecific lipid-transfer protein similar to nonspecific lipid-transfer protein GB:Q43019 [Prunus dulcis];supported by full-length cDNA: Ceres 258675\_at 1.1

unknown protein 258593\_at 1.1

beta-glucosidase, putative similar to beta-glucosidase GB:AAF23823 from [Arabidopsis thaliana];supported by full-length cDNA: Ceres:37856. 258512\_at 1.1

putative stearyl-acyl carrier protein desaturase similar to stearyl-acyl carrier protein desaturase GB:CAA07349 from [Linum usitatissimum];support 258485\_at 1.1

14-3-3 protein GF14nu (grf7) identical to 14-3-3 protein GF14 nu GI:1531631 from [Arabidopsis thaliana];supported by full-length cDNA: Ceres:3794 258489\_at 1.1

cell division protein FtsH-like protein similar to cell division protein FtsH GB:AAD35665 from [Thermotoga maritima];supported by full-length cDNA: C 258494\_at 1.1

expressed protein supported by cDNA: gi:14194102 258444\_at 1.1

lipoamide dehydrogenase precursor identical to GB:AAF34796 from [Arabidopsis thaliana] 258439\_at 1.1

putative selenocysteine methyltransferase similar to selenocysteine methyltransferase GB:P56707 from [Astragalus bisulcatus];supported by full-lenç 258322\_at 1.1

unknown protein contains GMC oxidoreductase domain; supported by cDNA: gi\_13605691\_gb\_AF361827.1\_AF361827 258299\_at 1.1

unknown protein 258263\_at 1.1

unknown protein 258202\_at 1.1

putative GTP pyrophosphokinase similar to GTP PYROPHOSPHOKINASE GB:O87331 from [Corynebacterium glutamicum]; supported by cDNA: gi\_ 258207\_at 1.1

unknown protein ;supported by full-length cDNA: Ceres:15577. 258188\_at 1.1

unknown protein contains Pfam profile: PF01738 diene lactone hydrolase family; supported by cDNA: gi\_13899072\_gb\_AF370531.1\_AF370531 258108\_at 1.1

putative tyrosine phosphatase similar to GB:AAF08382 from [Drosophila melanogaster] 258007\_at 1.1

hypothetical protein contains Pfam profile:PF00534 Glycosyl transferases group 1 257797\_at 1.1

unknown protein ;supported by full-length cDNA: Ceres:124193. 257672\_at 1.1

calmodulin-domain protein kinase CDPK isoform 9 identical to GB:AAB03242 from [Arabidopsis thaliana]; supported by cDNA: gi\_1399264\_gb\_U31 257621\_at 1.1

methionine aminopeptidase, putative similar to methionine aminopeptidase I GB:AAA75193 [Saccharomyces cerevisiae]; supported by cDNA: gi\_11 257646\_at 1.1

zinc-binding dehydrogenase, putative contains Pfam profile: PF00107 zinc-binding dehydrogenases;supported by full-length cDNA: Ceres:34261. 257212\_at 1.1

unknown protein ; supported by cDNA: gi\_15146182\_gb\_AY049232.1\_ 257154\_at 1.1

unknown protein 257018\_at 1.1

unknown protein 256986\_at 1.1

unknown protein 256928\_at 1.1

unknown protein similar to alpha galactosidase GB:AAA73963 [Glycine max] 256866\_at 1.1

casein kinase, putative similar to casein kinase 1 GB:NP\_001883 from [Homo sapiens] 256783\_at 1.1

unknown protein 256754\_at 1.1

unknown protein ;supported by full-length cDNA: Ceres:13928. 256724\_at 1.1

dTDP-glucose 4,6-dehydratase, putative similar to dTDP-glucose 4,6-dehydratase GB:AE000666 GI:6626257 from [Methanobacterium thermoautot 256575\_at 1.1

hypothetical protein predicted by genefinder;supported by full-length cDNA: Ceres:108003. 256399\_at 1.1

ATP-dependent Clp protease proteolytic subunit (ClpP3) identical to ATP-dependent Clp protease (nClpP3) GI:5360591 (Arabidopsis thaliana) 256411\_at 1.1

unknown protein similar to N-term half of NAC domain protein NAM [Arabidopsis thaliana] GI:4325282;supported by full-length cDNA: Ceres:21634. 256300\_at 1.1

ankyrin-like protein contains Pfam profile: PF00023 Ank repeat; supported by full-length cDNA: Ceres: 153785. 256233\_at 1.1

unknown protein 256229\_at 1.1

hypothetical protein 255876\_at 1.1

|                                                                                                                                                       |             |     |
|-------------------------------------------------------------------------------------------------------------------------------------------------------|-------------|-----|
| putative PRP19-like spliceosomal protein WD-40 repeat protein                                                                                         | 255830_at   | 1.1 |
| predicted protein of unknown function ; supported by cDNA: gi_16648930_gb_AY059835.1_                                                                 | 255638_at   | 1.1 |
| putative protein predicted protein, Arabidopsis thaliana and various predicted ATP dependent RNA helicases                                            | 255600_s_at | 1.1 |
| hypothetical protein                                                                                                                                  | 255615_at   | 1.1 |
| GBF2, G-box binding factor ;supported by full-length cDNA: Ceres:16533.                                                                               | 255625_at   | 1.1 |
| putative protein similar to several proteins containing a tandem repeat region such as Plasmodium falciparum GGM tandem repeat protein (GB:U278       | 255473_at   | 1.1 |
| contains a short region of similarity to another Arabidopsis hypothetical protein F19K23.8 (GB:AC000375)                                              | 255475_at   | 1.1 |
| putative protein similar to A. thaliana protein F15K9.3, GenBank accession number 3850566                                                             | 255466_at   | 1.1 |
| putative oxidoreductase similar to P. vulgaris gibberellin 20-oxidase, GenBank accession number U70530                                                | 255437_at   | 1.1 |
| putative protein hypothetical protein, Arabidopsis thaliana                                                                                           | 255224_at   | 1.1 |
| ferredoxin--NADP+ reductase - like protein ferredoxin--NADP+ reductase, Pisum sativum, PIR:T06773;supported by full-length cDNA: Ceres:33486.         | 255230_at   | 1.1 |
| putative host response protein pir7a protein - rice, PIR2:S47086                                                                                      | 255025_at   | 1.1 |
| putative protein phosphatase like protein - Arabidopsis thaliana,PIR2:T05589;supported by full-length cDNA: Ceres:152712.                             | 254918_at   | 1.1 |
| hypothetical protein                                                                                                                                  | 254779_at   | 1.1 |
| putative protein ; supported by cDNA: gi_16323185_gb_AY057697.1_                                                                                      | 254764_at   | 1.1 |
| putative protein predicted protein, Arabidopsis thaliana, PATCHX:E327449                                                                              | 254701_at   | 1.1 |
| putative protein                                                                                                                                      | 254711_at   | 1.1 |
| putative protein W15DMY32F, W25DMY32F                                                                                                                 | 254657_s_at | 1.1 |
| hypothetical protein                                                                                                                                  | 254602_at   | 1.1 |
| hypothetical protein                                                                                                                                  | 254501_at   | 1.1 |
| putative protein various predicted proteins;supported by full-length cDNA: Ceres:17340.                                                               | 254389_s_at | 1.1 |
| cellulose synthase catalytic subunit - like protein cellulose synthase catalytic subunit (Ath-A), Arabidopsis thaliana, gb:AF027173                   | 254185_at   | 1.1 |
| auxin response factor 9 (ARF9) ; supported by cDNA: gi_4580574_gb_AF082176.1_AF082176                                                                 | 254194_at   | 1.1 |
| hsp 70-like protein heat shock 70 protein - Spinacia oleracea,PID:g2654208                                                                            | 254148_at   | 1.1 |
| putative proteasome regulatory subunit KIAA0107 gene, Homo sapiens, D14663;supported by full-length cDNA: Ceres:38927.                                | 254086_at   | 1.1 |
| SRG1-like protein strong homology to SRG1 protein, a new member of the Fe(II)/ascorbate oxidase superfamily, PID:g479047                              | 254053_s_at | 1.1 |
| hypothetical protein                                                                                                                                  | 254067_at   | 1.1 |
| choline monooxygenase - like protein choline monooxygenase precursor, Spinacia oleracea,gb:U85780                                                     | 253701_at   | 1.1 |
| MAP kinase kinase 2 ; supported by cDNA: gi_14326470_gb_AF385688.1_AF385688                                                                           | 253646_at   | 1.1 |
| cyclic nucleotide and calmodulin-regulated ion channel-like protein cyclic nucleotide and calmodulin-regulated ion channel - Arabidopsis thaliana,PII | 253615_at   | 1.1 |
| putative protein myosin heavy chain, neuronal, Rattus norvegicus, Pir1:S21801; supported by cDNA: gi_14334773_gb_AY035060.1_                          | 253523_at   | 1.1 |
| putative protein tomato leucine zipper-containing protein - Lycopersicon esculentum, PIR2:S21495                                                      | 253531_at   | 1.1 |
| putative protein gene C42D8.3, Caenorhabditis elegans, PID:G1293846                                                                                   | 253469_at   | 1.1 |
| putative protein mixed-lineage protein kinase, Homo sapiens, PIR:A53800                                                                               | 253473_at   | 1.1 |
| putative protein ring finger protein, Hordeum vulgare                                                                                                 | 253444_at   | 1.1 |
| putative protein cyclopropane-fatty-acyl-phospholipid synthase, Escherichia coli, PIR2:A44292; supported by full-length cDNA: Ceres: 4369.            | 253362_s_at | 1.1 |
| putative protein YHR077c (NMD2,IFS1) protein - Saccharomyces cerevisiae,PID:g555939; supported by cDNA: gi_14334747_gb_AY035047.1_                    | 253335_at   | 1.1 |
| hypothetical protein                                                                                                                                  | 253294_at   | 1.1 |
| putative protein RING-finger protein, Lotus japonicus, PIR2:S49446                                                                                    | 253265_at   | 1.1 |
| cytoplasmic aconitate hydratase (citrate hydro-lyase)(aconitase)(EC 4.2.1.3)                                                                          | 253135_at   | 1.1 |
| hypothetical protein                                                                                                                                  | 253020_at   | 1.1 |
| putative protein other predicted Arabidopsis thaliana proteins                                                                                        | 253037_at   | 1.1 |
| putative protein ;supported by full-length cDNA: Ceres:125922.                                                                                        | 252945_at   | 1.1 |
| putative protein alpha-amino-epsilon-caprolactam racemase, Achromobacter obae, PIR2:JC1497; supported by cDNA: gi_5731258_gb_AF166351.1               | 252855_at   | 1.1 |
| putative protein 70K peroxisomal membrane protein, Rattus norvegicus ,PIR2:A35723; supported by cDNA: gi_15320528_gb_AF378120.1_AF3781                | 252830_at   | 1.1 |
| putative protein ; supported by cDNA: gi_14334983_gb_AY035165.1_                                                                                      | 252391_at   | 1.1 |
| putative protein predicted proteins, Arabidopsis thaliana                                                                                             | 252402_s_at | 1.1 |
| betaine aldehyde dehydrogenase-like protein betaine aldehyde dehydrogenase - Amaranthus hypochondriacus,PID:g2388710; supported by cDNA:              | 252354_at   | 1.1 |
| putative protein pir7a protein - Oryza sativa, PIR:s47086;supported by full-length cDNA: Ceres:30104.                                                 | 252168_at   | 1.1 |
| putative protein hypothetical protein F16F14.2 - Arabidopsis thaliana, EMBL:AC007047                                                                  | 252142_at   | 1.1 |
| sigma factor SigC ; supported by cDNA: gi_2353174_gb_AF015544.1_AF015544                                                                              | 251929_at   | 1.1 |
| Expressed protein ; supported by full-length cDNA: Ceres: 120919.                                                                                     | 251845_at   | 1.1 |
| aquaporin MIP - like protein aquaporin 2, Samanea saman, AF067185; supported by full-length cDNA: Ceres: 11929.                                       | 251858_at   | 1.1 |
| Ca-dependent solute carrier - like protein peroxisomal Ca-dependent solute carrier, Oryctolagus cuniculus, EMBL:AF004161;supported by full-length     | 251757_at   | 1.1 |
| alpha-soluble NSF attachment protein ; supported by cDNA: gi_6013203_gb_AF177989.1_AF177989                                                           | 251721_s_at | 1.1 |
| putative protein several hypothetical proteins - different plant species; supported by cDNA: gi_16604698_gb_AY059794.1_                               | 251713_at   | 1.1 |
| putative protein stricotosidine synthase (EC 4.3.3.2) - Rauvolfia mannii (fragment)                                                                   | 251679_at   | 1.1 |
| putative protein translation releasing factor RF-2 - Synecocystis sp., PIR:S76448                                                                     | 251670_at   | 1.1 |
| translation initiation factor 3 -like protein mammary tumor-associated protein INT6 - Homo sapiens, EMBL:U94174; supported by cDNA: gi_145325:        | 251628_at   | 1.1 |
| ATP-dependent RNA helicase-like protein ATP-dependent RNA helicase - Xenopus laevis, PIR:S13654;supported by full-length cDNA: Ceres:4158.            | 251529_at   | 1.1 |
| putative protein PBK1 protein, Homo sapiens, EMBL:HSA7398                                                                                             | 251538_at   | 1.1 |
| putative protein crp1 protein, involved in post-transcriptional control of chloroplast gene expression - Zea mays, PIR:T01685                         | 251496_at   | 1.1 |
| putative protein hypothetical proteins - Arabidopsis thaliana; supported by cDNA: gi_14334587_gb_AY034967.1_                                          | 251356_at   | 1.1 |
| putative protein several hypothetical proteins - Arabidopsis thaliana; supported by cDNA: gi_14517361_gb_AY039515.1_                                  | 251308_at   | 1.1 |
| cytochrome p450 (CYP78A9) ;supported by full-length cDNA: Ceres:29661.                                                                                | 251301_at   | 1.1 |
| putative protein several O-methyltransferases - different species;supported by full-length cDNA: Ceres:40117.                                         | 251304_at   | 1.1 |
| putative protein predicted protein, Arabidopsis thaliana; supported by cDNA: gi_14334781_gb_AY035064.1_                                               | 251153_at   | 1.1 |
| putative protein hypothetical proteins - Arabidopsis thaliana;supported by full-length cDNA: Ceres:14817.                                             | 251073_at   | 1.1 |
| putative protein                                                                                                                                      | 250928_at   | 1.1 |
| putative protein similar to unknown protein (dbj BAA90353.1)                                                                                          | 250830_at   | 1.1 |
| eukaryotic translation initiation factor 2 alpha subunit-like protein ; supported by cDNA: gi_13358180_gb_AF324988.2_AF324988                         | 250779_at   | 1.1 |
| ABC transporter-like protein ; supported by cDNA: gi_14488081_gb_AF389289.1_AF389289                                                                  | 250690_at   | 1.1 |
| Mei2-like protein Mei2-like protein - Arabidopsis thaliana, EMBL:D86122                                                                               | 250617_at   | 1.1 |
| putative protein condensin subunit SMC4, Drosophila melanogaster, EMBL:AF186472                                                                       | 250559_at   | 1.1 |
| putative protein predicted proteins, Arabidopsis thaliana                                                                                             | 250486_at   | 1.1 |
| putative protein mRNA, Moritella marina, EMBL:AB025342                                                                                                | 250275_at   | 1.1 |
| putative protein mRNA, Moritella marina, EMBL:AB025342                                                                                                | 250276_at   | 1.1 |
| putative protein                                                                                                                                      | 250179_at   | 1.1 |
| putative protein various predicted proteins, Arabidopsis thaliana                                                                                     | 250194_at   | 1.1 |
| putative protein contains similarity to DNA repair protein                                                                                            | 250105_at   | 1.1 |
| anthranilate phosphoribosyltransferase, chloroplast precursor (sp)Q02166) ; supported by cDNA: gi_15450851_gb_AY054506.1_                             | 250014_at   | 1.1 |
| casein kinase-like protein                                                                                                                            | 250021_at   | 1.1 |
| soluble starch synthase                                                                                                                               | 249785_at   | 1.1 |
| acyl-peptide hydrolase-like                                                                                                                           | 249690_at   | 1.1 |
| putative protein tropomyosin gene 1, isoform 9D, D. melanogaster, EMBL:DMTRO13                                                                        | 249628_at   | 1.1 |
| cysteine-tRNA ligase -like protein cysteine-tRNA ligase, Arabidopsis thaliana, PIR:T47747                                                             | 249537_at   | 1.1 |
| kanadaplin - like protein unnamed ORF, Homo sapiens, EMBL:AK001486                                                                                    | 249538_at   | 1.1 |



|                                                                                                                                                           |             |     |
|-----------------------------------------------------------------------------------------------------------------------------------------------------------|-------------|-----|
| putative protein                                                                                                                                          | 249506_at   | 1.1 |
| GTPase activator protein of Rab-like small GTPases-like protein                                                                                           | 249281_at   | 1.1 |
| putative protein similar to unknown protein (dbj BAA84809.1);supported by full-length cDNA: Ceres:27758.                                                  | 249229_at   | 1.1 |
| dynamilin-like protein (pir S59558) ;supported by full-length cDNA: Ceres:42932.                                                                          | 249232_at   | 1.1 |
| pitrilysin                                                                                                                                                | 249218_at   | 1.1 |
| putative protein strong similarity to unknown protein (emb CAB87688.1)                                                                                    | 248817_at   | 1.1 |
| Lon protease homolog 1 precursor identical to Lon protease homolog 1 mitochondrial precursor SP:O64948 from [Arabidopsis thaliana]                        | 248818_at   | 1.1 |
| putative protein contains similarity to CCAAT-box-binding transcription factor; supported by cDNA: gi_14326579_gb_AF385744.1_AF385744                     | 248764_at   | 1.1 |
| putative protein contains similarity to 5 -nucleotidase                                                                                                   | 248628_at   | 1.1 |
| permease                                                                                                                                                  | 248558_at   | 1.1 |
| putative protein similar to unknown protein (pir S75732);supported by full-length cDNA: Ceres:35710.                                                      | 248537_at   | 1.1 |
| putative protein strong similarity to unknown protein (dbj BAA78737.1);supported by full-length cDNA: Ceres:150246.                                       | 248399_at   | 1.1 |
| cyclic nucleotide-regulated ion channel (emb CAA76178.1) ; supported by cDNA: gi_13877752_gb_AF370139.1_AF370139                                          | 248250_at   | 1.1 |
| putative protein contains similarity to enolase-phosphatase                                                                                               | 248234_at   | 1.1 |
| homogentisate 1,2-dioxygenase ;supported by full-length cDNA: Ceres:6599.                                                                                 | 248193_at   | 1.1 |
| putative protein strong similarity to unknown protein (pir T04825); supported by cDNA: gi_14596222_gb_AY042899.1_                                         | 248115_at   | 1.1 |
| unknown protein                                                                                                                                           | 248067_at   | 1.1 |
| putative protein contains similarity to actin                                                                                                             | 247997_at   | 1.1 |
| WD-repeat protein-like ;supported by full-length cDNA: Ceres:109499.                                                                                      | 248000_at   | 1.1 |
| Ca2+-transporting ATPase-like protein (emb CAB79748.1)                                                                                                    | 247937_at   | 1.1 |
| leucine zipper-containing protein leucine zipper-containing protein, Lycopersicon esculentum, PIR:S21495                                                  | 247811_at   | 1.1 |
| putative protein ;supported by full-length cDNA: Ceres:3086.                                                                                              | 247748_at   | 1.1 |
| putative protein myosin heavy chain, Dugesia japonica, EMBL:AB015484                                                                                      | 247738_at   | 1.1 |
| oxysterol-binding protein - like oxysterol-binding protein, Mus musculus, EMBL:AB017026; supported by cDNA: gi_15450785_gb_AY054473.1_                    | 247677_at   | 1.1 |
| putative protein transcriptional repressor NOT4-N, Homo sapiens, EMBL:AF180475                                                                            | 247669_at   | 1.1 |
| putative protein various predicted proteins from different species; supported by cDNA: gi_15912286_gb_AY056421.1_                                         | 247555_at   | 1.1 |
| RNA helicase - like protein RNA helicase, Homo sapiens, EMBL:Z70200                                                                                       | 247564_at   | 1.1 |
| snap25a ;supported by full-length cDNA: Ceres:14562.                                                                                                      | 247571_at   | 1.1 |
| RNA-binding protein - like RNA-binding protein, Nicotiana sylvestris, PIR:S46286; supported by cDNA: gi_16974555_gb_AY060565.1_                           | 247575_at   | 1.1 |
| putative transcription factor MYB28 ; supported by cDNA: gi_5823328_gb_AF175998.1_AF175998                                                                | 247549_at   | 1.1 |
| 100 kDa coactivator - like protein 100 kDa coactivator, Homp sapiens, PIR:I38968                                                                          | 247517_at   | 1.1 |
| putative protein similar to unknown protein (pir T00246)                                                                                                  | 247277_at   | 1.1 |
| disease resistance protein-like                                                                                                                           | 247065_s_at | 1.1 |
| putative protein contains similarity to unknown protein (sp Q10058);supported by full-length cDNA: Ceres:108335.                                          | 246985_at   | 1.1 |
| RuvB DNA helicase-like protein ; supported by cDNA: gi_16974567_gb_AY061754.1_                                                                            | 247014_at   | 1.1 |
| serine/threonine-specific protein kinase-like protein serine/threonine-specific protein kinase NPK15 - Nicotiana tabacum;supported by full-length cDN     | 246529_at   | 1.1 |
| putative protein Tat-SF1 - Homo sapiens, EMBL:U76992                                                                                                      | 246499_at   | 1.1 |
| cellulose synthase catalytic subunit -like protein Ath-B, cellulose synthase catalytic subunit, Arabidopsis thaliana, EMBL:AF027174                       | 246460_at   | 1.1 |
| Cu2+-transporting ATPase-like protein                                                                                                                     | 246276_at   | 1.1 |
| myb-related protein                                                                                                                                       | 246253_at   | 1.1 |
| tetratricopeptide repeat protein tetratricopeptide repeat protein - Homo sapiens, EMBL:U46570                                                             | 246120_at   | 1.1 |
| katanin p80 subunit - like protein katanin p80 subunit, Strongylocentrotus purpuratus, EMBL:AF052433                                                      | 246056_at   | 1.1 |
| putative protein ; supported by cDNA: gi_4103242_gb_AF022368.1_AF022368                                                                                   | 245971_at   | 1.1 |
| putative protein ;supported by full-length cDNA: Ceres:120101.                                                                                            | 245948_at   | 1.1 |
| hypothetical protein contains similarity to maleless protein (mle) G1:157905 from [Drosophila melanogaster]                                               | 245863_s_at | 1.1 |
| hypothetical protein predicted by genemark.hmm                                                                                                            | 245844_at   | 1.1 |
| tRNA-glutamine synthetase, putative similar to tRNA-glutamine synthetase G1:2995454 from [Lupinus luteus]                                                 | 245631_at   | 1.1 |
| galactokinase like protein                                                                                                                                | 245478_at   | 1.1 |
| hypothetical protein                                                                                                                                      | 245481_at   | 1.1 |
| disease resistance RPP5 like protein (fragment)                                                                                                           | 245460_at   | 1.1 |
| hypothetical protein ;supported by full-length cDNA: Ceres:13520.                                                                                         | 245385_at   | 1.1 |
| nuclear RNA binding protein A-like protein ;supported by full-length cDNA: Ceres:35156.                                                                   | 245387_at   | 1.1 |
| F12A21.17 similar to signal recognition particle 72kD gi 5902124                                                                                          | 245187_s_at | 1.1 |
| putative receptor-like protein kinase                                                                                                                     | 245130_at   | 1.1 |
| unknown protein                                                                                                                                           | 245137_at   | 1.1 |
| unknown protein similar to glycoprotein SP Q16186 G100_HUMAN; supported by cDNA: gi_13926226_gb_AF372873.1_AF372873                                       | 245045_at   | 1.1 |
| PSII D2 protein                                                                                                                                           | 245002_at   | 1.1 |
| RNA polymerase alpha subunit                                                                                                                              | 244978_at   | 1.1 |
| putative 3 -5 exonuclease similar to ribonuclease II RNB family protein GB:CAB16367 [Schizosaccharomyces pombe]; Pfam HMM hit: VacB and                   | 259704_at   | 1.1 |
| hypothetical protein predicted by genemark.hmm;supported by full-length cDNA: Ceres:39566.                                                                | 256854_at   | 1.1 |
| hypothetical protein                                                                                                                                      | 253716_at   | 1.1 |
| resistance protein, putative similar to resistance protein MG23 G1:9858478 from [Glycine max]                                                             | 264910_at   | 1   |
| putative reverse-transcriptase -like protein putative reverse-transcriptase T6B13.11 -Arabidopsis thaliana,PID:g3810595                                   | 254985_x_at | 1   |
| putative protein strong similarity to unknown protein (emb CAB16785.1)                                                                                    | 247067_at   | 1   |
| unknown protein similar to hypothetical protein PIR S76698 S76698; supported by cDNA: gi_15809963_gb_AY054250.1_                                          | 267562_at   | 1   |
| unknown protein                                                                                                                                           | 267501_at   | 1   |
| putative receptor-like protein kinase                                                                                                                     | 267481_at   | 1   |
| unknown protein                                                                                                                                           | 267406_at   | 1   |
| Expressed protein ; supported by full-length cDNA: Ceres: 24003.                                                                                          | 267211_at   | 1   |
| unknown protein ; supported by cDNA: gi_15451173_gb_AY054667.1_                                                                                           | 267180_at   | 1   |
| unknown protein ; supported by full-length cDNA: Ceres: 16625.                                                                                            | 267060_at   | 1   |
| unknown protein                                                                                                                                           | 267014_at   | 1   |
| unknown protein                                                                                                                                           | 267015_at   | 1   |
| hypothetical protein predicted by genscan                                                                                                                 | 266903_at   | 1   |
| unknown protein                                                                                                                                           | 266839_at   | 1   |
| FtsH protease, putative contains similarity to YME1 G1:295582, a member of the ftsH-SEC18-PAS1-CDC48 family of putative ATPase-encoding gen               | 266842_at   | 1   |
| putative peptide chain release factor                                                                                                                     | 266751_at   | 1   |
| phytochrome B Identical to GB:X17342                                                                                                                      | 266065_at   | 1   |
| putative potassium/proton antiporter                                                                                                                      | 265936_at   | 1   |
| unknown protein ; supported by cDNA: gi_15450955_gb_AY054558.1_                                                                                           | 265799_at   | 1   |
| unknown protein similar to ovarian tumor protein; supported by cDNA: gi_16604333_gb_AY058065.1_                                                           | 265630_at   | 1   |
| unknown protein similarity to ubiquitin family of proteins; supported by cDNA: gi_16930424_gb_AF419566.1_AF419566                                         | 265461_at   | 1   |
| hypothetical protein                                                                                                                                      | 265425_at   | 1   |
| similar to mammalian MHC III region protein G9a                                                                                                           | 265347_at   | 1   |
| histidine transport protein (PTR2-B) ; supported by cDNA: gi_13937184_gb_AF372946.1_AF372946                                                              | 265220_at   | 1   |
| putative auxin-induced protein ;supported by full-length cDNA: Ceres:155143.                                                                              | 265182_at   | 1   |
| similar to glucose 1-dehydrogenase (AB000617); similar to EST gb T88100 similar to oxidoreductase-like protein GB:CAB75763 G1:7019662 from [A 265107_s_at | 265107_s_at | 1   |

similar to 14KD proline-rich protein DC2.15 precursor (sp|P14009); similar to ESTs emb|Z17709 and emb|Z47685 similar to hybrid proline-rich protein 265111\_at 1

hypothetical protein predicted by genscan 265092\_at 1

hypothetical protein contains similarity to light-induced DNA-binding protein(CG-1) GI:587503 from [Petroselinum crispum] 264999\_at 1

F-box protein family, AtFBL5 contains similarity to F-box protein FBL2 GI:6063090 from [Homo sapiens];supported by full-length cDNA: Ceres:3549. 264957\_at 1

hypothetical protein predicted by genemark.hmm 264935\_at 1

hypothetical protein similar to hypothetical protein GB:CAB45806 264792\_at 1

unknown protein similar to L-allo-threonine aldolase (D87890); similar to ESTs gb|R30517, gb|T42772, gb|R90493, and gb|R90493;supported by full 264777\_at 1

unknown protein 264516\_at 1

fumarylacetoacetate hydrolase-like protein similar to fumarylacetoacetate hydrolase, gb|L41670 from Emericella nidulans 264396\_at 1

unknown protein similar to Lambda-PRL2 Arabidopsis thaliana cDNA clone GB:R30041 264354\_s\_at 1

unknown protein ESTs gb|T21276, gb|T45403, and gb|AA586113 come from this gene; supported by cDNA: gi\_15293190\_gb\_AY051029.1\_ 264367\_at 1

hypothetical protein predicted by genemark.hmm 264299\_s\_at 1

ATPase 70 kDa subunit, putative similar to ATPase 70 kDa subunit GI:558478 from [Brassica napus];supported by full-length cDNA: Ceres:17815. 264302\_at 1

putative SF2/ASF splicing modulator, Srp30 similar to GB:CAB42558 264255\_at 1

hypothetical protein predicted by genemark.hmm 264268\_at 1

hypothetical protein predicted by genemark.hmm; supported by cDNA: Ceres: 11408 (cDNA not full-length) 264141\_at 1

mercaptopyruvate sulfurtransferase (Mst1/Rdh1) identical to mercaptopyruvate sulfurtransferase GI:6009981 and thiosulfate sulfurtransferase GI:58: 264095\_at 1

unknown protein 264048\_at 1

putative salt-inducible protein 263958\_at 1

putative fructose biphosphate aldolase ;supported by full-length cDNA: Ceres:13024. 263921\_at 1

putative pyruvate kinase ;supported by full-length cDNA: Ceres:120685. 263922\_s\_at 1

putative ATP synthase ;supported by full-length cDNA: Ceres:31766. 263874\_at 1

hypothetical protein predicted by genscan 263864\_at 1

putative protein kinase contains a protein kinase domain profile (PDOC00100);supported by full-length cDNA: Ceres:123911. 263804\_at 1

coatomer alpha subunit 263743\_at 1

unknown protein ;supported by full-length cDNA: Ceres:20834. 263755\_at 1

putative vacuolar proton-ATPase subunit ; supported by cDNA: gi\_15450750\_gb\_AY053417.1\_ 263764\_at 1

gamma-adaptin, putative similar to gamma-adaptin GI:2765190 from [Homo sapiens] 263728\_at 1

3-methyladenine DNA glycosylase, putative Strong similarity to GB:P29102, 3-isopropylmalate dehydrogenase (IMDH) from Brassica napus. EST gt 263706\_s\_at 1

putative 1-aminocyclopropane-1-carboxylate oxidase Similar to Arabidopsis 2A6 (gb|X83096). EST gb|T76913 comes from this gene; supported by c 263668\_at 1

unknown protein 263639\_at 1

putative trehalose-6-phosphate phosphatase 263452\_at 1

putative bZIP transcription factor contains a bZIP transcription factor basic domain signature (PDOC00036); supported by cDNA: gi\_15450833\_gb\_A 263414\_at 1

putative protein kinase contains a protein kinase domain profile (PDOC00100);supported by full-length cDNA: Ceres:13257. 263419\_at 1

putative pre-mRNA splicing factor similar to splicing factor hPRP17 (gi|3283220); similar to ESTs emb|F15435 and dbj|AU062661 263261\_at 1

UDP-glucose:indole-3-acetate beta-D-glucosyltransferase, putative similar to UDP-glucose:indole-3-acetate beta-D-glucosyltransferase GI:2149127 263184\_at 1

hypothetical protein predicted by genemark.hmm 263145\_at 1

prenyltransferase, putative similar to prenyltransferase GI:1651651 from [Synechocystis sp.] 263122\_at 1

trehalose-6-phosphate synthase, putative similar to trehalose-6-phosphate synthase GI:4468259 from [Pichia angusta]; supported by cDNA: gi\_138: 263136\_at 1

dihydrolipoamide S-acetyltransferase, putative similar to dihydrolipoamide S-acetyltransferase GI:5669871 from [Zea mays]; supported by cDNA: gi\_ 262963\_at 1

hypothetical protein contains similarity to protein kinase (PK6) GI:170046 from [Glycine max] 262934\_s\_at 1

RNA-directed RNA polymerase, putative similar to RNA-directed RNA polymerase GB:CAA09697 GI:4138282 [Nicotiana tabacum] 262888\_at 1

putative glycogen synthase strong similarity to gb|X95759 soluble-starch-synthase precursor (SSIII) from Solanum tuberosum 262809\_at 1

aspartate aminotransferase nearly identical to aspartate aminotransferase, cytoplasmic isozyme 2 SP:P46646 [Arabidopsis thaliana (Mouse-ear cre: 262646\_at 1

oxidoreductase, putative contains Pfam profile: PF00671 Iron/Ascorbate oxidoreductase family; supported by cDNA: gi\_13878118\_gb\_AF370322.1\_ 262638\_at 1

putative glutathione transferase One of three repeated putative glutathione transferases. 72% identical to glutathione transferase [Arabidopsis thalial 262518\_at 1

Mlo protein, putative similar to Mlo protein GB:Z83834 GI:1877220 from [Hordeum vulgare];supported by full-length cDNA: Ceres:259664. 262455\_at 1

serine/threonine kinase, putative similar to serine/threonine kinase GB:Y12530 GI:2181187 from [Brassica oleracea]; supported by cDNA: gi\_15810: 262458\_at 1

unknown protein 262331\_at 1

pale cress protein identical to GB:CAA65334;supported by full-length cDNA: Ceres:28047. 262316\_at 1

putative cyclin similar to cyclin GB:4502627 from [Homo sapiens];supported by full-length cDNA: Ceres:33877. 262296\_at 1

unknown protein Similar to gb|AF151884 CGI:126 protein from Homo sapiens. EST gb|Z18048 comes from this gene; supported by full-length cDNA 262298\_at 1

peptide transporter, putative similar to PEPTIDE TRANSPORTER PTR2-B GB:P46032 GI:1172704 from [Arabidopsis thaliana] 262281\_at 1

hypothetical protein predicted by genscan+ 262207\_at 1

hypothetical protein predicted by genemark.hmm; supported by cDNA: gi\_16209708\_gb\_AY057616.1\_ 262223\_at 1

Avr9 elicitor response protein, putative similar to Avr9 elicitor response protein GI:4138265 from [Nicotiana tabacum] 262188\_at 1

glutathione S-transferase, putative similar to glutathione S-transferase GI:860955 from [Hyoscyamus muticus]; supported by cDNA: gi\_15215607\_gi 262119\_s\_at 1

hypothetical protein contains similarity to helicase-like protein NHL GI:6969265 from [Homo sapiens] 262066\_at 1

hypothetical protein contains similarity to PP2 lectin polypeptide GI:410436 from [Cucurbita maxima]; supported by cDNA: gi\_15292968\_gb\_AY0509 262061\_at 1

hypothetical protein predicted by genemark.hmm;supported by full-length cDNA: Ceres:206286. 261921\_at 1

unknown protein 261885\_at 1

unknown protein 261853\_at 1

DNA-binding protein, putative similar to helicase-like transcription factor GB:CAA86572 GI:1658307 from [Homo sapiens]; supported by cDNA: gi\_14: 261862\_at 1

hypothetical protein predicted by genemark.hmm;supported by full-length cDNA: Ceres:108306. 261823\_at 1

unknown protein contains Pfam profile:PF00560 Leucine Rich Repeat (4 copies); Pfam profile:PF00069 Eukaryotic protein kinase domain; Pfam pro 261513\_at 1

RIBOSOMAL PROTEIN, putative similar to 30S RIBOSOMAL PROTEIN S1 GB:P46228 from [Synechococcus sp.]; supported by cDNA: gi\_150818: 261522\_at 1

hypothetical protein predicted by genemark.hmm 261524\_at 1

hypothetical protein contains similarity to zinc finger protein GI:1399465 from [Cryptosporidium parvum];supported by full-length cDNA: Ceres:20571: 261376\_at 1

proton pump interactor, putative similar to GB:CAB43882 from [Arabidopsis thaliana] 261365\_at 1

unknown protein 261250\_at 1

hypothetical protein predicted by genemark.hmm 261183\_at 1

disulfide isomerase-related protein, putative similar to GB:AAB50217 from [Homo sapiens] 261167\_at 1

hypothetical protein predicted by genemark.hmm 261173\_at 1

unknown protein 261179\_at 1

ribo kinase, putative similar to GB:AAD00536 from [Pyrobaculum aerophilum] 261136\_at 1

tropinone reductase-I, putative similar to GB:L20473 from [Datura stramonium] (Proc. Natl. Acad. Sci. U.S.A. 90, 9591-9595 (1993)); supported by c 261084\_at 1

hypothetical protein similar to unknown protein GB:AAF32477 GI:6957733 from [Arabidopsis thaliana] 261043\_at 1

glyoxalase II, putative similar to GI:1644427 from (Arabidopsis thaliana); supported by cDNA: gi\_15450394\_gb\_AY052298.1\_ 260986\_at 1

26S proteasome regulatory particle triple-A ATPase subunit4, putative similar to 26S proteasome regulatory particle triple-A ATPase subunit4 GI:11: 260940\_at 1

peptide transporter PTR2-B, putative similar to SP:P46032 from [Arabidopsis thaliana] 260693\_at 1

hypothetical protein predicted by genscan+ 260663\_at 1

unknown protein ; supported by full-length cDNA: Ceres: 4026. 260673\_at 1

unknown protein 260679\_at 1

endochitinase isolog 260568\_at 1

putative electron transfer flavoprotein ubiquinone oxidoreductase 260536\_at 1

putative protein kinase similar to protein kinase APK1A GB:Q06548 [Arabidopsis thaliana]; contains Pfam profile: PF00069 Eukaryotic protein kinase 260415\_at 1

receptor protein kinase, putative similar to receptor protein kinase GI:1389566 from (Arabidopsis thaliana); supported by cDNA: gi\_4204848\_gb\_U5: 260345\_at 1

putative alpha galactosyltransferase similar to alpha galactosyltransferase GB:CAB52246 [Trigonella foenum-graecum] (plant cell wall matrix polysac 260222\_at 1

putative SET protein, phosphatase 2A inhibitor similar to SET protein, phosphatase 2A inhibitor GB:Q01105 [Homo sapiens] (role in the mechanism of 260235\_at 1

putative phosphoglucomutase similar to phosphoglucomutase GB:AAC00601 [Arabidopsis thaliana] 260207\_at 1

putative hydroxymethyltransferase similar to serine hydroxymethyltransferase GB:P50433 from [Solanum tuberosum];supported by full-length cDNA: 260126\_at 1

unknown protein ;supported by full-length cDNA: Ceres:36337. 260009\_at 1

unknown protein 259942\_at 1

unknown protein similar to LIGATIN GB:Q61211 from (Mus musculus), contains PAS domain Sensory-box 259948\_at 1

unknown protein 259903\_at 1

putative cinnamyl-alcohol dehydrogenase similar to cinnamyl-alcohol dehydrogenase GB:AAC35846 [Medicago sativa] 259911\_at 1

hypothetical protein predicted by genscan 259762\_at 1

unknown protein 259689\_x\_at 1

hypothetical protein 259582\_at 1

protein kinase, putative similar to protein kinase Gl:2852447 from (Arabidopsis thaliana) 259541\_at 1

unknown protein 259422\_at 1

hypothetical protein predicted by genscan+ 259444\_at 1

hypothetical protein similar to hypothetical protein Gl:6598642 from [Arabidopsis thaliana] 259392\_at 1

hypothetical protein predicted by genemark.hmm 259397\_at 1

putative SAR DNA-binding protein-1 similar to GB:AAC16330 from [Pisum sativum]; supported by cDNA: gi\_11878186\_gb\_AF302491.1\_AF302491 259311\_at 1

unknown protein similar to HYP1 GB:CAA55187 from [Arabidopsis thaliana] 259318\_at 1

unknown protein 259321\_at 1

spindly (gibberellin signal transduction protein) identical to spindly GB:AAC49446 [Arabidopsis thaliana]; supported by cDNA: gi\_1589777\_gb\_U621; 259259\_at 1

unknown protein ; supported by cDNA: gi\_15724287\_gb\_AF412084.1\_AF412084 259240\_at 1

hypothetical protein predicted by genefinder 259249\_at 1

unknown protein 259207\_at 1

putative cell division control protein similar to cell division control protein 48, AAA family (cdc48-1) GB:AAB89948 [Archaeoglobus fulgidus] 259176\_at 1

unknown protein 259191\_at 1

hypothetical protein predicted by genefinder; supported by cDNA: gi\_16604636\_gb\_AY059763.1\_ 259156\_at 1

hypothetical protein predicted by genemark.hmm, contains Pfam profile:PF01553 Acyltransferase; supported by cDNA: gi\_14423461\_gb\_AF386968 259113\_at 1

26S proteasome AAA-ATPase subunit RPT5a identical to GB:AAF22525 from [Arabidopsis thaliana]; supported by cDNA: gi\_5669046\_gb\_AF08157 259114\_at 1

unknown protein 259121\_at 1

putative zeta-carotene desaturase precursor nearly identical to zeta-carotene desaturase precursor GB:AAA91161 [Arabidopsis thaliana];supported by 259092\_at 1

unknown protein similar to putative protein GB:CAB40988 [Arabidopsis thaliana] 259043\_at 1

unknown protein ; supported by full-length cDNA: Ceres:801. 259055\_at 1

hypothetical protein similar to Ku70-binding protein GB:AAD31085 [Homo sapiens]; supported by cDNA: gi\_13877934\_gb\_AF370230.1\_AF370230 259056\_at 1

unknown protein C-terminal portion similar to mannosyltransferase GB:BAA28328 [Escherichia coli];supported by full-length cDNA: Ceres:17844. 258917\_at 1

unknown protein similar to GB:AAD55296; supported by cDNA: gi\_13605628\_gb\_AF361640.1\_AF361640 258853\_at 1

putative potassium transporter similar to potassium transporter GB:AAB87687 [Arabidopsis thaliana]; supported by cDNA: gi\_6742168\_gb\_AF20762 258860\_at 1

unknown protein ; supported by full-length cDNA: Ceres: 118261. 258879\_at 1

unknown protein similar to GB:AAD10646 [Arabidopsis thaliana];supported by full-length cDNA: Ceres:117342. 258812\_at 1

hypothetical protein similar to hypothetical protein GB:AAF23212 Gl:6671952 from (Arabidopsis thaliana) 258756\_at 1

unknown protein 258478\_at 1

putative RNA helicase similar to RNA helicase GB:CAA09200 from [Arabidopsis thaliana] 258449\_s\_at 1

putative protein kinase similar to mitogen activated protein kinase kinase GB:AAC32599 from [Oryza sativa];supported by full-length cDNA: Ceres:26 258456\_at 1

unknown protein similar to leucine-rich repeat protein GB:CAA76000 and GB:CAA76001 from [Arabidopsis thaliana] 258390\_at 1

unknown protein contains Pfam profile: PF00076 RNA recognition motif 258229\_at 1

Snf1-related protein kinase KIN11 (AKIN11) identical to protein kinase Akin11 Gl:1729444 [Arabidopsis thaliana] 258221\_at 1

phosphoprotein phosphatase, putative similar to phosphoprotein phosphatase GB:AAB18613 from [Mus musculus] 258215\_at 1

glutamine synthetase, putative similar to Gln synthetase GB:228456 from [Arabidopsis thaliana];supported by full-length cDNA: Ceres:5507. 258160\_at 1

chaperonin subunit, putative similar to cytosolic chaperonin, delta-subunit GB:CAA09989 [Glycine max]; contains Pfam profile: PF00118 TCP-1/cpn1 258152\_at 1

putative protein peroxidase - Lycopersicon esculentum, PIR:S32768 257890\_s\_at 1

unknown protein contains Pfam profile:PF01435 Peptidase family M48;supported by full-length cDNA: Ceres:156849. 257791\_at 1

unknown protein 257717\_at 1

hypothetical protein predicted by genemark.hmm 257723\_at 1

unknown protein contains Pfam profile: PF00400 2 WD domains, G-beta repeats 257684\_s\_at 1

cytochrome P450, putative similar to cytochrome P450 GB:O65784 [Arabidopsis thaliana]; supported by full-length cDNA: Ceres: 262802. 257634\_s\_at 1

cytochrome P450 monooxygenase (CYP71B4) identical to cytochrome P450 monooxygenase (CYP71B4) GB:D78603 [Arabidopsis thaliana] (Plant 257635\_at 1

cytochrome P450, putative contains Pfam profile: PF00067 cytochrome P450;supported by full-length cDNA: Ceres:149380. 257129\_at 1

unknown protein similar to unknown protein GB:AAD43153 from [Arabidopsis thaliana] 256944\_at 1

glutamine:fructose-6-phosphate amidotransferase, putative similar to glutamine:fructose-6-phosphate amidotransferase 2 GB:BAA74729 [Mus musc 256911\_at 1

aminotransferase, putative similar to aminotransferase GB:CAA19897 from [Streptomyces coelicolor A3(2)]; supported by cDNA: gi\_14334463\_gb\_ 256765\_at 1

unknown protein ; supported by cDNA: gi\_13899104\_gb\_AF370547.1\_AF370547 256683\_at 1

hypothetical protein predicted by genemark.hmm 256613\_at 1

protein kinase, putative contains Pfam profile: PF00069 Eukaryotic protein kinase domain 256529\_at 1

deoxyguanosine kinase, putative similar to deoxyguanosine kinase [Homo sapiens] Gl:1480198;supported by full-length cDNA: Ceres:3878. 256341\_at 1

unknown protein 256294\_at 1

protein kinase, putative contains Pfam profile: PF00069 Eukaryotic protein kinase domain 256291\_at 1

transcription factor HBP-1B-like nearly identical to transcription factor HBP-1B SP:P43273 [Arabidopsis thaliana (Mouse-ear cress)]; supported by cC 256269\_at 1

nascent polypeptide associated complex alpha chain, putative similar to nascent polypeptide associated complex alpha chain GB:AAF27917 Gl:675 256241\_at 1

unknown protein 256100\_at 1

hypothetical protein similar to polygalacturonase-like protein Gl:10177371 from [Arabidopsis thaliana] 256038\_at 1

integral membrane protein, putative similar to integral membrane protein 1 (Itm1) Gl:508542 from [Mus musculus] 256029\_at 1

unknown protein contains similarity to apoptosis-related protein TFAR19 Gl:2407068 from [Homo sapiens];supported by full-length cDNA: Ceres:331 256001\_at 1

hypothetical protein contains Pfam profile: PF01416 tRNA pseudouridine synthase; supported by cDNA: gi\_14334543\_gb\_AY035176.1\_ 255887\_at 1

hypothetical protein contains similarity to PF01535 PPR repeat; supported by cDNA: gi\_15450346\_gb\_AY052274.1\_ 255888\_at 1

ABC transporter, putative similar to ABC transporter Gl:10280532 from [Homo sapiens] 255889\_at 1

kinase, putative similar to leaf rust resistance kinase Lr10 Gl:1680685 from [Triticum aestivum] 255913\_at 1

putative PTR2 family peptide transporter 255877\_at 1

putative serine carboxypeptidase II 255842\_at 1

Shaggy related protein kinase tetha ; supported by cDNA: gi\_17063157\_gb\_AY062099.1\_ 255635\_at 1

hypothetical protein ; supported by cDNA: gi\_14517493\_gb\_AY039582.1\_ 255557\_at 1

hypothetical protein similar to A. thaliana hypothetical protein from chromosome III, GenBank accession number 3068704 255492\_at 1

hypothetical protein similar to A. thaliana hypothetical protein F6E13.15, GenBank accession number 3212859 255465\_at 1

4-coumarate--CoA ligase - like protein 4-coumarate--CoA ligase 4CL, Arabidopsis thaliana, PIR:S57784 255263\_at 1

putative protein chromatin structural protein homolog Supt5hp - Mus musculus,PID:g2754752 255136\_s\_at 1

neutral invertase like protein Daucus carota mRNA, PID:e1372926;supported by full-length cDNA: Ceres:156092. 255038\_at 1

putative protein RNA helicase -Mus musculus,PIR2:184741 255053\_at 1

hypothetical protein 255026\_at 1

choline kinase GmCK2p-like protein choline kinase GmCK2p -Glycine max,PID:g1438881;supported by full-length cDNA: Ceres:126037., Ceres:73 254998\_at 1  
 choline kinase - like protein KI domain interacting kinase 1 -Zea mays,PIR2:T02053 254869\_at 1  
 flavonoid 3,5-hydroxylase -like protein flavonoid 3,5 -hydroxylase - Campanula medium, PID:d1003951 254834\_at 1  
 short-chain alcohol dehydrogenase like protein short-chain alcohol dehydrogenase -Picea abies, PIR2:S34678;supported by full-length cDNA: Ceres: 254759\_at 1  
 putative protein WERBP-1 - Nicotiana tabacum, EMBL:AB017693;supported by full-length cDNA: Ceres:38327. 254682\_at 1  
 hypothetical protein ;supported by full-length cDNA: Ceres:40589. 254683\_at 1  
 starch synthase-like protein bacterial and plant glycogen (starch) synthases; for example B.subtilis, PATCHX:D1020368 254659\_at 1  
 putative protein kinase ; supported by cDNA: gi\_13249122\_gb\_AF295667.1\_AF295667 254636\_at 1  
 putative protein 254547\_at 1  
 hypothetical protein ;supported by full-length cDNA: Ceres:40232. 254503\_at 1  
 UV-damaged DNA-binding protein- like damage-specific DNA binding protein 1, Homo sapiens, PIR2:I38908 254452\_at 1  
 putative protein heat shock protein dnaJ homolog, yeast, PIR2:A33618 254458\_at 1  
 serine/threonine protein kinase like protein serine/threonine protein kinase (ARSK1 gene), Arabidopsis thaliana, PATCHX:G1066501 254341\_at 1  
 HSP associated protein like p48, Homo sapiens, PATCHX:G904032;supported by full-length cDNA: Ceres:35786. 254275\_at 1  
 putative fizzy-related protein fizzy-related protein, Drosophila melanogaster, PID:g2326419 254284\_at 1  
 putative protein various predicted proteins; supported by cDNA: gi\_14423555\_gb\_AF387015.1\_AF387015 254174\_at 1  
 HSP90-like protein HSP90 homolog - Catharanthus roseus, PIR2:S39558; supported by cDNA: gi\_14532541\_gb\_AY039895.1 254166\_at 1  
 brefeldin A-sensitive Golgi protein - like brefeldin A-sensitive Golgi protein LDLC, Homo sapiens, PIR2:A53542; supported by cDNA: gi\_13605802\_c 254087\_at 1  
 P-glycoprotein-2 (pgp2) 254034\_at 1  
 fimbrin-like protein (ATFIM1) ; supported by cDNA: gi\_2905892\_gb\_U66424.1\_ATU66424 253956\_at 1  
 SERINE CARBOXYPEPTIDASE II - like protein serine-type carboxypeptidase, Hordeum vulgare, PIR2:S44191; supported by cDNA: gi\_15293048\_ 253600\_at 1  
 ubiquitin-specific protease 24 (UBP24), putative similar to GI:11993488; ubiquitin carboxyl-terminal hydrolase, Mus musculus, PID:D101289; suppo 253552\_at 1  
 putative protein crp1 protein, Zea mays, Z14393 253495\_at 1  
 sulfolipid biosynthesis protein SQD1 ; supported by cDNA: gi\_14190482\_gb\_AF380641.1\_AF380641 253386\_at 1  
 F-box protein family, AtFBL15 contains similarity to F-box protein FBL2 GI:6063090 from [Homo sapiens] 253369\_at 1  
 putative protein FAB1 protein, Saccharomyces cerevisiae, PIR2:S56274 253371\_at 1  
 hypothetical protein 253288\_at 1  
 putative protein ARI protein, Drosophila melanogaster, X98309; supported by cDNA: gi\_15292860\_gb\_AY050864.1\_ 253236\_at 1  
 L-ascorbate peroxidase ;supported by full-length cDNA: Ceres:21896. 253223\_at 1  
 invertase - like protein mRNA, Lilium longiflorum, gb:D21823; supported by cDNA: gi\_15215775\_gb\_AY050417.1\_ 253224\_at 1  
 phosphoserine aminotransferase ;supported by full-length cDNA: Ceres:34272. 253162\_at 1  
 putative protein Niemann-Pick C disease protein - Homo sapiens, PID:g2276463 252985\_at 1  
 glycine-rich protein (clone AtGRP8) ; supported by cDNA: gi\_166838\_gb\_L00649.1\_ATHRBPB 252885\_at 1  
 dnaJ protein homolog atj3 ;supported by full-length cDNA: Ceres:40976. 252670\_at 1  
 putative protein 252552\_at 1  
 heat shock protein 17 ; supported by cDNA: gi\_15294149\_gb\_AF410266.1\_AF410266 252515\_at 1  
 dTDP-glucose 4-6-dehydratases-like protein dTDP-glucose 4-6-dehydratases homolog - Arabidopsis thaliana,PIR:S58282;supported by full-length c 252527\_at 1  
 telomere repeat-binding protein homolog telomere repeat-binding protein - Arabidopsis thaliana, SWALL:CAB50690 252504\_at 1  
 putative RNA-binding protein various putative RNA binding proteins 252453\_at 1  
 chloroplast NAD-dependent malate dehydrogenase ; supported by cDNA: gi\_3256065\_emb\_Y13987.1\_ATMDH 252407\_at 1  
 putative protein predicted proteins, Arabidopsis thaliana 252359\_at 1  
 putative protein PrMC3 - Pinus radiata,PID:g4154352 252315\_at 1  
 putative protein lea32, Arabidopsis thaliana, EMBL:ATH131342;supported by full-length cDNA: Ceres:35969. 252229\_at 1  
 CASEIN KINASE II, ALPHA CHAIN 2 (CK II) ; supported by cDNA: gi\_391604\_dbj\_D10247.1\_ATHCK2B 252192\_at 1  
 putative protein hypothetical protein L1648.04 - Leishmania major, EMBL:LMFL1648 252139\_at 1  
 putative protein 252141\_at 1  
 hypothetical protein 252086\_at 1  
 monodehydroascorbate reductase (NADH) - like protein monodehydroascorbate reductase (NADH), Lycopericon esculentum, PIR:T06407;supporte 252024\_at 1  
 putative protein 251869\_at 1  
 putative protein proteophosphoglycan, Leishmania major, PIR:T46707supported by full-length cDNA: Ceres:6954. 251859\_at 1  
 putative protein KIAA0882 protein, Homo sapiens, EMBL:AB020689; supported by cDNA: gi\_15810197\_gb\_AY056113.1\_ 251829\_at 1  
 2-oxoglutarate dehydrogenase, E1 subunit - like protein 2-oxoglutarate dehydrogenase, E1 subunit, Arabidopsis thaliana, EMBL:ART223802 251787\_at 1  
 putative protein tyrosine kinase, Dictyostelium discoideum, PIR:A35670 251542\_at 1  
 putative protein inducible carbonyl reductase - Rattus norvegicus, EMBL:D89069 251480\_at 1  
 dynamin-like protein 4 (ADL4) ; supported by cDNA: gi\_6651400\_gb\_AF180733.1\_AF180733 251429\_at 1  
 putative protein Pm5 protein - Homo sapiens, PIR:S21977 251269\_at 1  
 putative protein ABP130 protein, Homo sapiens, EMBL:AB018359 251179\_at 1  
 putative protein various alpha amylases from diverse species; supported by cDNA: gi\_16323040\_gb\_AY057624.1\_ 251110\_at 1  
 putative protein symplekin - Homo sapiens, EMBL:HSSYMPLEK 251115\_at 1  
 putative protein 250950\_at 1  
 monodehydroascorbate reductase (NADH) - like protein monodehydroascorbate reductase (NADH), cucumber, PIR:JU0182;supported by full-length 250916\_at 1  
 putative protein ;supported by full-length cDNA: Ceres:257390. 250882\_at 1  
 putative protein contains similarity to unknown protein 250656\_at 1  
 putative protein 250624\_at 1  
 DR1-like protein TATA-binding protein-associated phosphoprotein Dr1 - Arabidopsis thaliana, EMBL:D38110supported by full-length cDNA: Ceres:3 250543\_at 1  
 splicing factor-like protein ; supported by cDNA: gi\_15451045\_gb\_AY054603.1\_ 250457\_at 1  
 unknown protein ; supported by cDNA: gi\_15983383\_gb\_AF424566.1\_AF424566 250459\_at 1  
 protein serine/threonine kinase-like protein putative protein serine/threonine kinase - Sorghum bicolor, EMBL:Y14600 250480\_at 1  
 putative protein predicted proteins, Homo sapiens, Drosophila melanogaster, Caenorhabditis elegans 250377\_at 1  
 putative protein various predicted proteins, Arabidopsis thaliana 250381\_at 1  
 putative protein predicted proteins, Arabidopsis thaliana 250350\_at 1  
 alpha-N-acetylglucosaminidase 250245\_at 1  
 unknown protein 250232\_at 1  
 early nodule-specific protein - like early nodule-specific protein, Medicago truncatula, EMBL:AF064775 250180\_at 1  
 Expressed protein ; supported by cDNA: gi\_16648944\_gb\_AY059842.1\_ 250134\_at 1  
 potassium-dependent sodium-calcium exchanger - like protein potassium-dependent sodium-calcium exchanger (NCKX2), Rattus norvegicus, EMBI 250054\_at 1  
 putative protein non-consensus GC donor splice site at exon 1, unknown (C40) protein, Homo sapiens, EMBL:AF103798 250042\_at 1  
 putative protein FACTOR ASSOCIATED WITH N-SMASE ACTIVATION, Homo sapiens, SWISSPROT:FAN\_HUMAN 249989\_at 1  
 putative protein 2-hydroxyisoflavone reductase (EC 1.3.1.45) - Nicotiana tabacum, PIR:T02202;supported by full-length cDNA: Ceres:17121. 250006\_at 1  
 putative protein contains similarity to two-component response regulator protein; supported by cDNA: gi\_10281005\_dbj\_AB046955.1\_AB046955 249741\_at 1  
 fimbrin ; supported by cDNA: gi\_15027846\_gb\_AY045780.1\_ 249720\_at 1  
 DNA helicase-like 249677\_at 1  
 unknown protein 249679\_at 1  
 5-oxoprolinase-like protein 5-oxoprolinase (ATP-hydrolyzing) (EC 3.5.2.9) - rat, PIR:T42756 249585\_at 1  
 receptor serine/threonine protein kinase-like receptor serine/threonine kinase PR5K, Arabidopsis thaliana, EMBL:AT48698 249552\_s\_at 1  
 putative protein crp1, Zea mays, PIR:T01685 249464\_at 1  
 putative protein strong similarity to unknown protein (pir|T13026) 249303\_at 1

|                                                                                                                                                          |             |     |
|----------------------------------------------------------------------------------------------------------------------------------------------------------|-------------|-----|
| cell cycle control crm (crooked neck) protein-like                                                                                                       | 249269_at   | 1   |
| glucose-6-phosphate isomerase, cytosolic (GPI) (phosphoglucose isomerase) (PGI) (phosphohexose isomerase) (PHI) (sp P34795) ; supported by               | 249163_at   | 1   |
| 26S proteasome AAA-ATPase subunit RPT4a (gb AAF22524.1) ; supported by cDNA: gi_13937182_gb_AF372945.1_AF372945                                          | 249180_at   | 1   |
| putative protein strong similarity to unknown protein (gb AAF24960.1)                                                                                    | 249133_at   | 1   |
| 1-aminocyclopropane-1-carboxylate oxidase ; supported by cDNA: gi_15983808_gb_AY056810.1_                                                                | 249128_at   | 1   |
| protein transport protein SEC23 ; supported by cDNA: gi_15810472_gb_AY056275.1_                                                                          | 249106_at   | 1   |
| PINHEAD (gb AAD40098.1); translation initiation factor                                                                                                   | 249115_at   | 1   |
| putative protein similar to unknown protein (dbj BAA91806.1); supported by cDNA: gi_13877730_gb_AF370128.1_AF370128                                      | 249092_at   | 1   |
| WD-repeat protein-like                                                                                                                                   | 249066_at   | 1   |
| Expressed protein ; supported by full-length cDNA: Ceres: 121432.                                                                                        | 249026_at   | 1   |
| disease resistance protein-like                                                                                                                          | 248994_at   | 1   |
| serine/threonine-protein kinase Mak (male germ cell-associated kinase)-like protein ; supported by cDNA: gi_15450859_gb_AY054510.1_                      | 248953_at   | 1   |
| unknown protein ;supported by full-length cDNA: Ceres:114691.                                                                                            | 248881_at   | 1   |
| putative protein contains similarity to RNA-binding protein;supported by full-length cDNA: Ceres:265530.                                                 | 248869_at   | 1   |
| putative protein contains similarity to maturase-related protein                                                                                         | 248815_at   | 1   |
| putative protein strong similarity to unknown protein (gb AAF07790.1)                                                                                    | 248755_at   | 1   |
| putative protein contains similarity to acyl-CoA thioesterase                                                                                            | 248697_at   | 1   |
| receptor-like protein kinase ; supported by cDNA: gi_13605826_gb_AF367312.1_AF367312                                                                     | 248698_at   | 1   |
| isoleucyl-tRNA synthetase                                                                                                                                | 248634_at   | 1   |
| putative protein strong similarity to unknown protein (gb AAD32890.1)                                                                                    | 248574_at   | 1   |
| putative protein strong similarity to unknown protein (pir T04010)                                                                                       | 248581_at   | 1   |
| adenylate kinase ;supported by full-length cDNA: Ceres:21741.                                                                                            | 248506_at   | 1   |
| unknown protein                                                                                                                                          | 248471_at   | 1   |
| receptor protein kinase-like                                                                                                                             | 248454_at   | 1   |
| unknown protein ;supported by full-length cDNA: Ceres:36309.                                                                                             | 248378_at   | 1   |
| AP2 domain transcription factor-like protein                                                                                                             | 248389_at   | 1   |
| RNA-binding protein-like                                                                                                                                 | 248294_at   | 1   |
| putative protein 3 (2 ), 5 -bisphosphate nucleotidase protein-like; also similar to yeast halotolerance protein HAL2;supported by full-length cDNA: Ce   | 248155_at   | 1   |
| putative protein similar to unknown protein (pir T40314)                                                                                                 | 247977_at   | 1   |
| putative protein contains similarity to protein kinase; supported by cDNA: gi_15810440_gb_AY056259.1_                                                    | 247985_at   | 1   |
| apospory-associated protein C                                                                                                                            | 247929_at   | 1   |
| contains similarity to phosphoesterase                                                                                                                   | 247854_at   | 1   |
| dTDP-glucose 4-6-dehydratase - like protein dTDP-glucose 4-6-dehydratase, Cicer arietinum, EMBL:CAR275318;supported by full-length cDNA: Ce              | 247720_at   | 1   |
| GTP-binding protein rab11 - like GTP-binding protein rab11, Arabidopsis thaliana, PIR:T12965; supported by cDNA: gi_13877722_gb_AF370127.1_              | 247722_at   | 1   |
| protein disulfide isomerase precursor - like protein disulfide isomerase precursor, Volvox carteri, EMBL:AF110784;supported by full-length cDNA: Cr      | 247588_at   | 1   |
| putative protein kinase-like transmembrane protein TMKL1 precursor, Arabidopsis thaliana, EMBL:ATTMKL1                                                   | 247533_at   | 1   |
| putative protein predicted protein, Arabidopsis thaliana                                                                                                 | 247487_at   | 1   |
| KED - like protein KED, Nicotiana tabacum, EMBL:AB009883                                                                                                 | 247480_at   | 1   |
| 1-deoxy-D-xylulose 5-phosphate reductoisomerase (DXR) ;supported by full-length cDNA: Ceres:117626.                                                      | 247401_at   | 1   |
| diacylglycerol kinase                                                                                                                                    | 247346_at   | 1   |
| pectin methylesterase-like protein supported by full-length cDNA: Ceres: 21903.                                                                          | 247239_at   | 1   |
| putative protein similar to unknown protein (gb AAD20127.1); supported by full-length cDNA: Ceres: 11225.                                                | 247140_at   | 1   |
| putative protein strong similarity to unknown protein (ref NP_005638.1); supported by cDNA: gi_16323187_gb_AY057698.1_                                   | 247002_at   | 1   |
| putative protein hypothetical proteins - Arabidopsis thaliana                                                                                            | 246979_s_at | 1   |
| CLC-d chloride channel protein                                                                                                                           | 246886_at   | 1   |
| putative protein predicted proteins, Arabidopsis thaliana                                                                                                | 246820_at   | 1   |
| UDP-glucose dehydrogenase-like protein UDP-glucose 6-dehydrogenase - Glycine max, EMBL:U53418; supported by cDNA: gi_15810322_gb_AY0                     | 246511_at   | 1   |
| Carboxylesterase-like protein sterol esterase - Rattus norvegicus, EMBL:Z22803                                                                           | 246524_at   | 1   |
| putative protein several hypothetical proteins - Arabidopsis thaliana                                                                                    | 246478_at   | 1   |
| 14-3-3 protein GF14upsilon (grf5) identical to 14-3-3 protein GF14 upsilon GI:2232148 from [Arabidopsis thaliana] ; supported by cDNA: gi_1433453        | 246489_at   | 1   |
| putative protein predicted proteins - Arabidopsis thaliana;supported by full-length cDNA: Ceres:34944.                                                   | 246452_at   | 1   |
| lethal leaf-spot 1 homolog Lls1                                                                                                                          | 246335_at   | 1   |
| high mobility group protein 2-like ; supported by cDNA: gi_15912190_gb_AY056373.1_                                                                       | 246311_at   | 1   |
| cytochrome P450, putative contains Pfam profile: PF00067: Cytochrome P450; supported by cDNA: gi_15912336_gb_AY056446.1_                                 | 246268_at   | 1   |
| tubulin-like protein                                                                                                                                     | 246278_at   | 1   |
| G-box-binding factor 1 ; supported by cDNA: gi_15450987_gb_AY054574.1_                                                                                   | 246211_at   | 1   |
| 26S proteasome AAA-ATPase subunit RPT6a - like protein 26S proteasome AAA-ATPase subunit RPT6a, Arabidopsis thaliana, EMBL:AF123395;s                    | 246147_s_at | 1   |
| putative protein VAC8 protein, Saccharomyces cerevisiae, PIR:S50446                                                                                      | 246062_at   | 1   |
| protein phosphatase 2A regulatory subunit B-like protein protein phosphatase 2A 62 kDa B regulatory subunit, Arabidopsis thaliana, TREMBL:AF1246050_s_at | 246005_at   | 1   |
| lipoid acid synthase - like protein lipoid acid synthase, Arabidopsis thaliana, PIR:T44259;supported by full-length cDNA: Ceres:152427.                  | 245895_at   | 1   |
| SIR2-family protein sirtuin type 4 (SIRT4) - Homo sapiens, EMBL:AF083109; supported by cDNA: gi_15028032_gb_AY045873.1_                                  | 245895_at   | 1   |
| potassium transport protein-like several potassium transport proteins                                                                                    | 245897_at   | 1   |
| GTL1 - like protein GTL1, Arabidopsis thaliana, EMBL:ATAJ3215; supported by cDNA: gi_14423451_gb_AF386963.1_AF386963                                     | 245861_at   | 1   |
| pinorensinol-laricresinol reductase, putative similar to pinorensinol-laricresinol reductase GB:AAF63508 GI:7542583 from [Thuja plicata];supported by    | 245792_at   | 1   |
| putative protein ;supported by full-length cDNA: Ceres:29990.                                                                                            | 245699_at   | 1   |
| RNA-binding protein-like                                                                                                                                 | 245714_at   | 1   |
| hypothetical protein predicted by genemark.hmm                                                                                                           | 245659_at   | 1   |
| unknown protein ;supported by full-length cDNA: Ceres:21415.                                                                                             | 245626_at   | 1   |
| acylaminoacyl-peptidase like protein                                                                                                                     | 245594_at   | 1   |
| SNF1 like protein kinase ; supported by cDNA: gi_13249502_gb_AY007221.1_                                                                                 | 245563_at   | 1   |
| hypothetical protein                                                                                                                                     | 245502_at   | 1   |
| hypothetical protein                                                                                                                                     | 245517_at   | 1   |
| Expressed protein ;supported by cDNA: gi:14423393                                                                                                        | 245521_at   | 1   |
| disease resistance RPP5 like protein                                                                                                                     | 245456_at   | 1   |
| hypothetical protein                                                                                                                                     | 245430_at   | 1   |
| putative serine protease-like protein                                                                                                                    | 245432_at   | 1   |
| G2484-1 protein                                                                                                                                          | 245415_at   | 1   |
| hypothetical protein ; supported by cDNA: gi_16323154_gb_AY057681.1_                                                                                     | 245272_at   | 1   |
| putative dihydroadipicinate synthase ;supported by full-length cDNA: Ceres:26817.                                                                        | 245145_at   | 1   |
| subtilisin-like serine protease contains similarity to subtilisin-like protease C1 GI:13325079 from [Glycine max]                                        | 245088_at   | 1   |
| hypothetical protein predicted by genscan                                                                                                                | 264806_at   | 1   |
| unknown protein                                                                                                                                          | 256505_at   | 1   |
| unknown protein                                                                                                                                          | 267071_at   | 0.9 |
| hypothetical protein predicted by genemark.hmm; supported by cDNA: gi_13430457_gb_AF360141.1_AF360141                                                    | 262964_at   | 0.9 |
| hypothetical protein                                                                                                                                     | 262669_at   | 0.9 |
| putative ethylene receptor (EIN4) similar to ethylene receptor GB:AAC31123 [Malus domestica], identical to putative ethylene receptor GB:AAD024E         | 258818_at   | 0.9 |
| unknown protein                                                                                                                                          | 248771_at   | 0.9 |

|                                                                                                                                                             |             |     |
|-------------------------------------------------------------------------------------------------------------------------------------------------------------|-------------|-----|
| peroxidase                                                                                                                                                  | 248382_at   | 0.9 |
| Expressed protein ; supported by cDNA: gi_16209721_gb_AY057621.1_                                                                                           | 245682_at   | 0.9 |
| transfactor, putative similar to GI:4519671 from [Nicotiana tabacum]                                                                                        | 259832_at   | 0.9 |
| Arabidopsis thaliana /REF=U37281 /DEF=actin-2 mRNA, complete cds /LEN=1637 (-5, -M, -3 represent transcript regions 5 prime, Middle, and 3 pr-r2-At-Actin-5 | 267642_at   | 0.9 |
| unknown protein                                                                                                                                             | 267511_at   | 0.9 |
| unknown protein                                                                                                                                             | 267512_at   | 0.9 |
| hypothetical protein predicted by genscan and genefinder; supported by cDNA: gi_4837732_gb_AF085354.1_AF085354                                              | 267446_s_at | 0.9 |
| putative tyrosyl-tRNA synthetase                                                                                                                            | 267373_at   | 0.9 |
| unknown protein                                                                                                                                             | 267365_at   | 0.9 |
| putative phosphoribosyl pyrophosphate synthetase                                                                                                            | 267189_at   | 0.9 |
| putative methionine aminopeptidase ; supported by cDNA: gi_11320961_gb_AF250964.1_AF250964                                                                  | 267194_s_at | 0.9 |
| putative ARP2/3 protein complex subunit p41                                                                                                                 | 267163_at   | 0.9 |
| unknown protein                                                                                                                                             | 267114_at   | 0.9 |
| Expressed protein ; supported by full-length cDNA: Ceres: 40603.                                                                                            | 266984_at   | 0.9 |
| unknown protein ; supported by cDNA: gi_15010737_gb_AY045670.1_                                                                                             | 266905_at   | 0.9 |
| putative katanin ;supported by full-length cDNA: Ceres:119620.                                                                                              | 266911_at   | 0.9 |
| putative protein kinase contains a protein kinase domain profile (PDOC00100)                                                                                | 266924_at   | 0.9 |
| unknown protein ;supported by full-length cDNA: Ceres:9000.                                                                                                 | 266809_at   | 0.9 |
| unknown protein ; supported by cDNA: gi_14532595_gb_AY039922.1_                                                                                             | 266818_at   | 0.9 |
| unknown protein                                                                                                                                             | 266734_at   | 0.9 |
| hypothetical protein predicted by genefinder and genscan; supported by cDNA: gi_14532607_gb_AY039928.1_                                                     | 266718_at   | 0.9 |
| putative zinc transporter ;supported by full-length cDNA: Ceres:207558.                                                                                     | 266593_at   | 0.9 |
| hypothetical protein predicted by genscan and genefinder                                                                                                    | 266554_s_at | 0.9 |
| eukaryotic translation initiation factor 3 delta subunit ; supported by cDNA: gi_1036802_gb_U36765.1_ATU36765                                               | 266557_at   | 0.9 |
| unknown protein ; supported by cDNA: gi_16604341_gb_AY058069.1_                                                                                             | 266485_at   | 0.9 |
| putative phospholipase ;supported by full-length cDNA: Ceres:33373.                                                                                         | 266471_at   | 0.9 |
| putative GTP-binding protein                                                                                                                                | 266448_s_at | 0.9 |
| unknown protein ;supported by full-length cDNA: Ceres:12017.                                                                                                | 266422_at   | 0.9 |
| hypothetical protein predicted by genscan; supported by cDNA: gi_15293096_gb_AY050982.1_                                                                    | 266370_at   | 0.9 |
| hypothetical protein predicted by genscan and genefinder;supported by full-length cDNA: Ceres:11854.                                                        | 266205_s_at | 0.9 |
| putative dTDP-glucose 4-6-dehydratase ;supported by full-length cDNA: Ceres:28205.                                                                          | 266228_at   | 0.9 |
| unknown protein ; supported by full-length cDNA: Ceres: 948.                                                                                                | 266080_at   | 0.9 |
| hypothetical protein predicted by genscan                                                                                                                   | 266087_at   | 0.9 |
| putative alcohol dehydrogenase                                                                                                                              | 265999_at   | 0.9 |
| unknown protein ; supported by cDNA: gi_14596216_gb_AY042896.1_                                                                                             | 265892_at   | 0.9 |
| hypothetical protein predicted by genscan and genefinder                                                                                                    | 265911_at   | 0.9 |
| unknown protein ;supported by full-length cDNA: Ceres:12261.                                                                                                | 265886_at   | 0.9 |
| putative protein phosphatase 2C ; supported by cDNA: gi_14517519_gb_AY039595.1_                                                                             | 265807_at   | 0.9 |
| unknown protein                                                                                                                                             | 265661_at   | 0.9 |
| putative protein kinase contains a protein kinase domain profile (PDOC00100); supported by cDNA: gi_15028152_gb_AY046026.1_                                 | 265650_at   | 0.9 |
| hypothetical protein predicted by genscan and genefinder; supported by cDNA: gi_15450829_gb_AY054495.1_                                                     | 265613_at   | 0.9 |
| putative DnaJ protein ; supported by cDNA: gi_14194100_gb_AF367256.1_AF367256                                                                               | 265538_at   | 0.9 |
| unknown protein predicted by genscan and genefinder                                                                                                         | 265452_at   | 0.9 |
| putative bHLH transcription factor                                                                                                                          | 265402_at   | 0.9 |
| hypothetical protein predicted by genscan; supported by full-length cDNA: Ceres: 32660.                                                                     | 265305_at   | 0.9 |
| putative tyrosine decarboxylase                                                                                                                             | 265161_at   | 0.9 |
| putative vacuolar sorting receptor similar to (gi 3033390); similar to EST dbj C72582                                                                       | 265019_at   | 0.9 |
| putative myosin heavy chain similar to ESTs emb Z35215 and emb Z35018                                                                                       | 264911_at   | 0.9 |
| auxin-induced protein, putative similar to auxin-induced protein(atb2) GI:6562980 from [Arabidopsis thaliana]                                               | 264894_at   | 0.9 |
| unknown protein Location of EST gb AA395277 gb T44807;supported by full-length cDNA: Ceres:36286.                                                           | 264667_s_at | 0.9 |
| hypothetical protein identical to hypothetical protein GB:AAB60753                                                                                          | 264639_at   | 0.9 |
| unknown protein similar to ubiquitin C-terminal hydrolase-like protein GI:9759113 from [Arabidopsis thaliana]; supported by cDNA: gi_15724237_gb_           | 264504_at   | 0.9 |
| unknown protein similar to ATP-citrate-lyase; Location of EST gb Z34587. Highly similar to F8A5.32, gb 2462746 and similar to ATP-citrate-lyase, gi         | 264349_at   | 0.9 |
| putative Proline synthetase associated protein Similar to hypothetical protein F09E5.8 gb U37429 from C. elegans. ESTs gb T42019 and gb N97000              | 264335_s_at | 0.9 |
| hypothetical protein contains similarity to ubiquitin protein ligase GI:2827198 from [Mus musculus]                                                         | 264283_at   | 0.9 |
| hypothetical protein contains similarity to calcium-independent phospholipase GI:7670058 from [Homo sapiens]                                                | 264165_at   | 0.9 |
| hypothetical protein contains similarity to toluene tolerance protein Ttg2A GI:4336798 from [Pseudomonas putida]; supported by cDNA: gi_13605494            | 264080_at   | 0.9 |
| putative vacuolar proton-ATPase subunit                                                                                                                     | 264045_at   | 0.9 |
| putative GTP cyclohydrolase                                                                                                                                 | 263906_at   | 0.9 |
| plastid division protein (FtsZ) identical to AF089738; supported by cDNA: gi_15292820_gb_AY050844.1_                                                        | 263786_at   | 0.9 |
| putative auxin-responsive protein ; supported by cDNA: gi_15292854_gb_AY050861.1_                                                                           | 263717_at   | 0.9 |
| malate oxidoreductase (malic enzyme)                                                                                                                        | 263705_at   | 0.9 |
| unknown protein contains similarity to gi 1653332 extragenic suppressor (SuhB) from Synechocystis sp. gb D90912 and is a member of the Inositol r           | 263669_at   | 0.9 |
| putative cryptochrome 2 apoprotein Match to Arabidopsis photolysase (PHH1) gene (gb X99061) and cryptochrome 2 apoprotein (CRY2) (gb U4339                  | 263297_at   | 0.9 |
| putative ADP-ribosylation factor ; supported by cDNA: gi_15450780_gb_AY054470.1_                                                                            | 263163_at   | 0.9 |
| fructokinase, putative predicted by genefinder                                                                                                              | 263076_at   | 0.9 |
| putative protein kinase/endoribonuclease ; supported by cDNA: gi_13194577_gb_AF308596.1_AF308596                                                            | 262982_at   | 0.9 |
| unknown protein ;supported by full-length cDNA: Ceres:157730.                                                                                               | 262958_at   | 0.9 |
| water stress-induced protein, putative similar to water stress-induced protein, GI:454880 from [Oryza sativa]; supported by full-length cDNA: Ceres:        | 262919_at   | 0.9 |
| unknown protein ; supported by cDNA: gi_13937148_gb_AF372928.1_AF372928                                                                                     | 262874_at   | 0.9 |
| hypothetical protein predicted by genemark.hmm                                                                                                              | 262811_at   | 0.9 |
| unknown protein ESTs gb R65381 and gb T44635 come from this gene                                                                                            | 262706_at   | 0.9 |
| putative ATP-dependent RNA helicase similar to gb L13612 DEAD-box protein (dbp45A) from Drosophila melanogaster and is a member of PF 0027                  | 262629_at   | 0.9 |
| heat shock protein, putative contains Pfam profile: PF00011 Hsp20/alpha crystallin family;supported by full-length cDNA: Ceres:21735.                       | 262514_at   | 0.9 |
| NAM(no apical meristem) protein, putative similar to NAM protein GI:6066595 from (Petunia hybrida); supported by cDNA: gi_13605664_gb_AF361                 | 262496_at   | 0.9 |
| unknown protein ; supported by full-length cDNA: Ceres:37444.                                                                                               | 262473_at   | 0.9 |
| chloroplast FtsH protease almost identical to chloroplast FtsH protease GI:1483215, SP:Q39102 from [Arabidopsis thaliana]                                   | 262397_at   | 0.9 |
| hypothetical protein predicted by genemark.hmm;supported by full-length cDNA: Ceres:230.                                                                    | 262314_at   | 0.9 |
| unknown protein contains similarity to zinc finger and C2 domain protein GI:9957238 from [Arabidopsis thaliana];supported by full-length cDNA: Cere         | 262194_at   | 0.9 |
| hypothetical protein similar to putative curved-DNA binding protein GI:6968662 from [Campylobacter jejuni];supported by full-length cDNA: Ceres:37          | 261953_at   | 0.9 |
| UDP-galactose 4-epimerase, putative similar to GI:3021357 from (Cyamopsis tetragonoloba) (Plant Sci. 142, 147-154 (1999))                                   | 261955_at   | 0.9 |
| proteasome regulatory subunit, putative similar to 26S proteasome regulatory complex subunit p30 GB:AAF08395 GI:6434966 from [Drosophila me                 | 261919_at   | 0.9 |
| type 2 peroxiredoxin, putative similar to type 2 peroxiredoxin GI:4928472 from [Brassica rapa subsp. pekinensis];supported by full-length cDNA: Cer         | 261935_at   | 0.9 |
| phosphoribosylanthranilate transferase, putative similar to phosphoribosylanthranilate transferase GI:1396053 from [Pisum sativum]                          | 261839_at   | 0.9 |
| unknown protein                                                                                                                                             | 261770_at   | 0.9 |
| prolyl endopeptidase, putative similar to prolyl endopeptidase GI:6561876 from [Mus musculus]                                                               | 261774_at   | 0.9 |
| unknown protein                                                                                                                                             |             |     |

|                                                                                                                                                           |             |     |
|-----------------------------------------------------------------------------------------------------------------------------------------------------------|-------------|-----|
| DNA-binding protein PcMYB1, putative similar to DNA-binding protein PcMYB1 GB:U67133 GI:2224898 from [Petroselinum crispum];supported by f                | 261637_at   | 0.9 |
| DNA-binding protein, putative similar to DNA binding protein CCA1 from [Arabidopsis thaliana]                                                             | 261569_at   | 0.9 |
| unknown protein                                                                                                                                           | 261558_at   | 0.9 |
| hypothetical protein                                                                                                                                      | 261553_at   | 0.9 |
| hypothetical protein predicted by genemark.hmm                                                                                                            | 261383_at   | 0.9 |
| ferredoxin-NADP reductase precursor, putative similar to GB:M25528 from [Mesembryanthemum crystallinum]                                                   | 261218_at   | 0.9 |
| hypothetical protein contains similarity to nascent polypeptide associated complex alpha chain GI:6752882 from [Pinus taeda];supported by full-length     | 261189_at   | 0.9 |
| unknown protein ; supported by cDNA: gi_15215745_gb_AY050402.1_                                                                                           | 261208_at   | 0.9 |
| unknown protein ;supported by full-length cDNA: Ceres:112024.                                                                                             | 261147_at   | 0.9 |
| hypothetical protein predicted by genemark.hmm                                                                                                            | 261086_at   | 0.9 |
| hypothetical protein similar to hypothetical protein GB:CAB45785 GI:5262156 from [Arabidopsis thaliana];supported by full-length cDNA: Ceres:3998.        | 261056_at   | 0.9 |
| hypothetical protein similar to carboxyvinyl-carboxyphosphonate phosphorylmutase GB:O49290 from [Arabidopsis thaliana]                                    | 260902_at   | 0.9 |
| decoy identical to GB:AAB51588 GI:1931612 from [Arabidopsis thaliana]; supported by cDNA: gi_1842110_gb_U87586.1_ATU87586                                 | 260781_at   | 0.9 |
| unknown protein similar to Cryptosporidium parvum elongation factor-2 GB:U21667 GI:706974 from [Cryptosporidium parvum]                                   | 260786_s_at | 0.9 |
| putative SF16 protein (Helianthus annuus)                                                                                                                 | 260610_at   | 0.9 |
| stearoyl-ACP desaturase ; supported by cDNA: gi_15081681_gb_AY048233.1_                                                                                   | 260570_at   | 0.9 |
| unknown protein ; supported by cDNA: gi_15810460_gb_AY056269.1_                                                                                           | 260501_at   | 0.9 |
| hypothetical protein ; supported by cDNA: gi_15292844_gb_AY050856.1_                                                                                      | 260489_at   | 0.9 |
| ARG1 protein (Altered Response to Gravity) identical to GB:AAD13758; supported by cDNA: gi_4249661_gb_AF089810.1_AF089810                                 | 260445_at   | 0.9 |
| putative peptide transporter similar to peptide transporter GB:AAC32034 [Hordeum vulgare]; supported by full-length cDNA: Ceres: 22243.                   | 260410_at   | 0.9 |
| putative lipase similar to lipase GB:CAA74737 from [Drosophila melanogaster]; supported by cDNA: gi_15293100_gb_AY050984.1_                               | 260393_at   | 0.9 |
| fructokinase (Frk1), putative similar to fructokinase (Frk1) GI:2102690 from (Lycopersicon esculentum)                                                    | 260343_at   | 0.9 |
| putative disease resistance protein similar to disease resistance protein RPP1-WsC GB:AAC72979 [Arabidopsis thaliana]                                     | 260312_at   | 0.9 |
| putative RING zinc finger protein contains Pfam profile: PF00097 zinc finger, C3HC4 type (RING finger)                                                    | 260330_at   | 0.9 |
| putative acetylornithine transaminase similar to ACETYLORNITHINE AMINOTRANSFERASE PRECURSOR (ACOAT) GB:O04866 from (Alnus glutia                          | 260286_at   | 0.9 |
| unknown protein similar to hypothetical proteins GB:AAD39276 [Arabidopsis thaliana], GB:CAB53491 [Oryza sativa];supported by full-length cDNA:            | 260227_at   | 0.9 |
| putative lipoxygenase similar to 13-lipoxygenase GB:CAA65269 [Solanum tuberosum]                                                                          | 260190_at   | 0.9 |
| DNA-directed RNA polymerase subunit, putative similar to GI:6723961 from [Schizosaccharomyces pombe]                                                      | 260049_at   | 0.9 |
| putative DNA-binding protein contains Pfam profile: PF01388 ARID DNA binding domain                                                                       | 259967_at   | 0.9 |
| putative pyrophosphate-dependent phosphofructokinase alpha subunit similar to pyrophosphate-dependent phosphofructokinase alpha subunit GB:A              | 259969_at   | 0.9 |
| unknown protein ;supported by full-length cDNA: Ceres:114376.                                                                                             | 259977_at   | 0.9 |
| putative UDP-glucose:glycoprotein glucosyltransferase similar to UDP-glucose:glycoprotein glucosyltransferase precursor GB:Q09332 [Drosophila m           | 259936_at   | 0.9 |
| putative ABC transporter contains Pfam profile: PF00005 ABC transporter                                                                                   | 259937_s_at | 0.9 |
| hypothetical protein ;supported by full-length cDNA: Ceres:110945.                                                                                        | 259862_at   | 0.9 |
| putative DnaJ protein similar to dnaJ-like protein GB:CAA72705 [Arabidopsis thaliana]; Pfam HMM hit:DnaJ, prokaryotic heat shock protein                  | 259876_at   | 0.9 |
| unknown protein                                                                                                                                           | 259835_at   | 0.9 |
| arm repeat-containing protein, putative similar to GI:2558938 from [Brassica napus] (Proc. Natl. Acad. Sci. U.S.A. 95 (1), 382-387 (1998))                | 259826_at   | 0.9 |
| nucellin-like protein similar to nucellin GB:AAB96882 [Hordeum vulgare] (nucellin: similar to aspartic protease and its specific expression in nucellar c | 259733_at   | 0.9 |
| putative phorbol ester / diacylglycerol binding protein Pfam HMM hit: Phorbol esters / diacylglycerol binding domain                                      | 259673_at   | 0.9 |
| DNA-directed RNA polymerase identical to DNA-directed RNA polymerase, mitochondrial precursor GB:P92969 [Arabidopsis thaliana]                            | 259672_at   | 0.9 |
| hypothetical protein predicted by genscan                                                                                                                 | 259642_at   | 0.9 |
| putative DNA-binding protein predicted by genscan, multiple est matches; Pfam HMM hit: helix-loop-helix DNA-binding domain;supported by full-length       | 259645_at   | 0.9 |
| bZIP protein, putative similar to GI:600855 from [Arabidopsis thaliana] (Plant Physiol. 109 (2), 723 (1995)); supported by cDNA: gi_15450410_gb_A'        | 259610_at   | 0.9 |
| hypothetical protein ; supported by cDNA: gi_13430675_gb_AF360250.1_AF360250                                                                              | 259518_at   | 0.9 |
| protein phosphatase 2A regulatory subunit, putative similar to protein phosphatase 2A regulatory subunit GI:683502 from [Arabidopsis thaliana]            | 259407_at   | 0.9 |
| serin threonin-kinase, putative similar to serin threonin-kinase GI:2887282 from (Drosophila melanogaster); supported by cDNA: gi_15450801_gb_A           | 259362_s_at | 0.9 |
| putative sodium proton exchanger similar to sodium proton exchanger Nhx1 GB:AAD16946 [Arabidopsis thaliana]                                               | 259081_at   | 0.9 |
| unknown protein                                                                                                                                           | 259047_at   | 0.9 |
| unknown protein predicted by genscan; est match;supported by full-length cDNA: Ceres:3820.                                                                | 259038_at   | 0.9 |
| hypothetical protein similar to unknown protein                                                                                                           | 258997_at   | 0.9 |
| putative aspartate kinase similar to aspartate kinase GB:CAA67376 (Arabidopsis thaliana); supported by full-length cDNA: Ceres: 6203.                     | 258977_s_at | 0.9 |
| unknown protein similar to unknown proteins GB:AAD24625 [Arabidopsis thaliana], GB:AAC73026 [Arabidopsis thaliana]                                        | 258933_at   | 0.9 |
| putative dehydroquinase shikimate dehydrogenase similar to dehydroquinase shikimate dehydrogenase GB:S46210 [Nicotiana tabacum]                           | 258908_at   | 0.9 |
| Expressed protein ; supported by full-length cDNA: Ceres: 9573.                                                                                           | 258848_at   | 0.9 |
| putative T-complex protein 1, theta subunit (TCP-1-Theta) similar to T-complex protein 1, theta subunit (TCP-1-Theta) GB:P42932 [Mus musculus]; :         | 258816_at   | 0.9 |
| unknown protein ; supported by cDNA: gi_16226859_gb_AF428353.1_AF428353                                                                                   | 258731_at   | 0.9 |
| hypothetical protein contains Pfam profile: PF01535 domain of unknown function                                                                            | 258573_at   | 0.9 |
| putative mudrA protein similar to mudrA protein GB:S59141 [Zea mays]                                                                                      | 258550_at   | 0.9 |
| putative chaperonin similar to chaperonin subunit 6a (zeta) GB:NP_033968 from [Mus musculus];supported by full-length cDNA: Ceres:116386.                 | 258482_at   | 0.9 |
| unknown protein similar to hypothetical protein GB:CAB36798 from [Arabidopsis thaliana]                                                                   | 258361_at   | 0.9 |
| putative pectinesterase similar to pectinesterase precursor GB:Q43043 [Petunia integrifolia]; contains Pfam profile: PF01095 pectinesterase;support       | 258193_at   | 0.9 |
| dehydrogenase, putative similar to dihydropyrimidine dehydrogenase GB:BAA89789 from [Homo sapiens]; supported by cDNA: gi_14334711_gb_A'                  | 258162_at   | 0.9 |
| unknown protein ; supported by cDNA: gi_14423467_gb_AF386971.1_AF386971                                                                                   | 258154_at   | 0.9 |
| putative cytochrome P450 similar to GB:Q05047 from [Catharanthus roseus]                                                                                  | 258113_at   | 0.9 |
| putative cytochrome P450 similar to GB:Q05047 from [Catharanthus roseus]; supported by cDNA: gi_15529168_gb_AY052208.1_                                   | 258063_at   | 0.9 |
| unknown protein ; supported by cDNA: gi_14334715_gb_AY035031.1_                                                                                           | 258085_at   | 0.9 |
| ubiquitin-specific protease 7 (UBP7), putative similar to GI:11993467; supported by cDNA: gi_11993466_gb_AF302661.1_AF302661                              | 258045_at   | 0.9 |
| unknown protein ; supported by cDNA: gi_15027906_gb_AY045810.1_                                                                                           | 257989_at   | 0.9 |
| hypothetical protein contains Pfam profile: PF01535 domain of unknown function (2 copies)                                                                 | 257744_at   | 0.9 |
| unknown protein ; supported by cDNA: gi_15010791_gb_AY045697.1_                                                                                           | 257660_at   | 0.9 |
| cytochrome P450, putative contains Pfam profile: PF00067 cytochrome P450                                                                                  | 257623_at   | 0.9 |
| unknown protein                                                                                                                                           | 257594_at   | 0.9 |
| unknown protein                                                                                                                                           | 257268_at   | 0.9 |
| syntaxin-like protein similar to syntaxin 5A GB:NP_003155 from [Homo sapiens] (J. Mol. Neurosci. (1997) 8 (2), 159-161)                                   | 257157_at   | 0.9 |
| t-complex polypeptide 1 homologue identical to t-complex polypeptide 1 homologue GB:D11351 [Arabidopsis thaliana]; supported by cDNA: gi_2178             | 257125_at   | 0.9 |
| putative 3-hydroxybutyryl-CoA dehydrogenase similar to 3-HYDROXYBUTYRYL-COA DEHYDROGENASE GB:Q45223 from [Bradyrhizobium japon                            | 257052_at   | 0.9 |
| unknown protein contains Pfam profile: PF01188 Mandelate racemase/muconate lactonizing enzyme family; supported by cDNA: gi_13878120_gb_/_                | 257067_at   | 0.9 |
| unknown protein                                                                                                                                           | 257019_at   | 0.9 |
| RNA helicase, putative similar to RNA helicase GB:CAA09195 from [Arabidopsis thaliana]; supported by cDNA: gi_15215677_gb_AY050367.1_                     | 257023_at   | 0.9 |
| unknown protein                                                                                                                                           | 256927_at   | 0.9 |
| unknown protein                                                                                                                                           | 256932_at   | 0.9 |
| hypothetical protein predicted by genemark.hmm;supported by full-length cDNA: Ceres:41717.                                                                | 256804_at   | 0.9 |
| unknown protein contains PF00612 IQ:IQ calmodulin-binding motif                                                                                           | 256822_at   | 0.9 |
| 20S proteasome subunit PAC1 identical to GB:AAC32057 from [Arabidopsis thaliana] (Genetics (1998) 149 (2), 677-692);supported by full-length cD           | 256795_at   | 0.9 |
| putative protein dihydrolipoamide S-acetyltransferase precursor GB:CAB41340 GI:4678949 [Arabidopsis thaliana]; supported by cDNA: gi_5881964_             | 256682_at   | 0.9 |
| hypothetical protein predicted by genscan+                                                                                                                | 256605_at   | 0.9 |
| unknown protein                                                                                                                                           | 256480_at   | 0.9 |

|                                                                                                                                                     |             |     |
|-----------------------------------------------------------------------------------------------------------------------------------------------------|-------------|-----|
| unknown protein                                                                                                                                     | 256422_at   | 0.9 |
| unknown protein ;supported by full-length cDNA: Ceres:110819.                                                                                       | 256327_at   | 0.9 |
| 6-phosphogluconate dehydrogenase, putative similar to 6-phosphogluconate dehydrogenase GB:BAA22812 GI:2529229 [Glycine max];supported b             | 256328_at   | 0.9 |
| C2H2-type zinc finger protein, putative contains multiple zinc finger domains: PF00096: Zinc finger, C2H2 type; supported by cDNA: gi_15809914_g    | 256344_at   | 0.9 |
| disease resistance protein, putative similar to disease resistance protein RPP1-WsB [Arabidopsis thaliana] GI:9279731; supported by cDNA: gi_145    | 256303_at   | 0.9 |
| unknown protein                                                                                                                                     | 256173_at   | 0.9 |
| unknown protein                                                                                                                                     | 256106_at   | 0.9 |
| MAP kinase, putative similar to MAP3K delta-1 protein kinase GI:2253010 from [Arabidopsis thaliana]                                                 | 256121_at   | 0.9 |
| ubiquitin, putative similar to ubiquitin GI:10177083 from [Arabidopsis thaliana]; supported by cDNA: gi_16974595_gb_AY060574.1_                     | 256071_at   | 0.9 |
| unknown protein                                                                                                                                     | 255991_at   | 0.9 |
| hypothetical protein predicted by genscan+                                                                                                          | 255994_at   | 0.9 |
| basic blue protein, putative similar to basic blue protein GI:6688810 from [Medicago sativa]                                                        | 255896_at   | 0.9 |
| lysine and histidine specific transporter, putative similar to lysine and histidine specific transporter GI:2576361 from [Arabidopsis thaliana]     | 255726_at   | 0.9 |
| coded for by A. thaliana cDNA T20615 ;supported by full-length cDNA: Ceres:37305.                                                                   | 255626_at   | 0.9 |
| putative GTP pyrophosphokinase similar to bacterial GTP pyrophosphokinases (RelA) similar to B. subtilis RelA (EC 2.7.6.5), GenBank accession n     | 255522_at   | 0.9 |
| hypothetical protein                                                                                                                                | 255526_at   | 0.9 |
| putative chloroplast outer envelope 86-like protein similar to P. sativum outer envelope 86 protein OEP86, GenBank accession number Z31581; sup     | 255482_at   | 0.9 |
| putative protein other predicted proteins, Arabidopsis thaliana;supported by full-length cDNA: Ceres:34781.                                         | 254858_at   | 0.9 |
| putative protein various predicted 3-isopropylmalate dehydratases/aconitate hydratases; supported by cDNA: gi_15027970_gb_AY045842.1_               | 254742_at   | 0.9 |
| putative protein G9A protein, Mus musculus, AF109906; supported by cDNA: gi_13517758_gb_AF344452.1_AF344452                                         | 254745_at   | 0.9 |
| putative disease resistance protein Cf-4 ,Lycopersicon hirsutum, gb:AJ002235                                                                        | 254735_at   | 0.9 |
| glycine-rich cell wall protein-like glycine-rich protein 1.0 precursor, Phaseolus vulgaris, PIR1:S01821; supported by cDNA: gi_14030676_gb_AF3754   | 254667_at   | 0.9 |
| putative protein                                                                                                                                    | 254594_at   | 0.9 |
| RNase L inhibitor-like protein RNase L inhibitor (clone 8), Homo sapiens                                                                            | 254615_at   | 0.9 |
| kinase-like protein protein kinase rck, Mus musculus, PIR2:148733; supported by cDNA: gi_14532759_gb_AY040004.1_                                    | 254560_at   | 0.9 |
| putative protein p47 - Homo sapiens,PID:g5531827                                                                                                    | 254348_at   | 0.9 |
| hypothetical protein ; supported by cDNA: gi_15028306_gb_AY045956.1_                                                                                | 254304_at   | 0.9 |
| phosphatase like protein phosphoprotein phosphatase (EC 3.1.3.16) PPT - rat                                                                         | 254211_at   | 0.9 |
| hypothetical protein                                                                                                                                | 254178_at   | 0.9 |
| putative protein hypothetical protein, Synechocystis sp., PIR:S76577;supported by full-length cDNA: Ceres:30708.                                    | 254187_at   | 0.9 |
| putative protein protein induced upon wounding - Arabidopsis thaliana, PID:e257749;supported by full-length cDNA: Ceres:34176.                      | 254157_at   | 0.9 |
| protein kinase (AFC2) ; supported by cDNA: gi_601788_gb_U16177.1_ATU16177                                                                           | 254131_at   | 0.9 |
| putative protein met-10+ protein, Neurospora crassa, PIR2:S46697                                                                                    | 253912_at   | 0.9 |
| putative beta-glucosidase beta-glucosidase BGQ60 precursor - barley, PIR2:A57512                                                                    | 253835_at   | 0.9 |
| putative protein hypothetical protein - Schizosaccharomyces pombe, PID:e1295810                                                                     | 253803_at   | 0.9 |
| heat-shock protein heat-shock protein hsp40-human, PIR2:JN0912; supported by cDNA: gi_14596114_gb_AY042845.1_                                       | 253778_at   | 0.9 |
| hypothetical protein                                                                                                                                | 253782_at   | 0.9 |
| hypothetical protein ; supported by cDNA: gi_14335143_gb_AY037251.1_                                                                                | 253596_s_at | 0.9 |
| putative protein KIAA0800 protein, Homo sapiens, EMBL:AB018343                                                                                      | 253560_at   | 0.9 |
| DNA topoisomerase like- protein Bacillus subtilis DNA Topoisomerase I; PID:G520753                                                                  | 253566_at   | 0.9 |
| putative protein predicted protein, Arabidopsis thaliana, gb:AC002337                                                                               | 253431_at   | 0.9 |
| putative protein predicted protein, Synechocystis sp., PIR2:S74814; supported by cDNA: gi_14334011_gb_AF302188.1_AF302188                           | 253394_at   | 0.9 |
| putative protein RNA-binding protein LAH1, Saccharomyces cerevisiae,PIR2:B48600; supported by cDNA: gi_15810396_gb_AY056237.1_                      | 253396_at   | 0.9 |
| putative protein AT.I.24, Arabidopsis thaliana, gb:U63815;supported by full-length cDNA: Ceres:4868.                                                | 253382_at   | 0.9 |
| putative protein aminotransferase (AspC family), Aquifex aeolicus, PIR2:D70479; supported by cDNA: gi_15912290_gb_AY056423.1_                       | 253308_at   | 0.9 |
| putative protein predicted protein, Arabidopsis thaliana, PATCHX:G2347201                                                                           | 253266_s_at | 0.9 |
| putative protein predicted protein A_TM017A05.4 Arabidopsis thalianaBAC TM017A05, PID:g2435512                                                      | 253109_at   | 0.9 |
| thaumatin-like protein thaumatin-like protein, Arabidopsis thaliana, Pir2:S71175; supported by cDNA: gi_13430505_gb_AF360165.1_AF360165             | 253104_at   | 0.9 |
| cytochrome P450-like protein                                                                                                                        | 253097_at   | 0.9 |
| putative protein predicted protein, Arabidopsis thaliana; supported by cDNA: gi_15451175_gb_AY054668.1_                                             | 253062_at   | 0.9 |
| squalene epoxidase - like protein squalene epoxidase, Panax ginseng, AB003516;supported by full-length cDNA: Ceres:118648.                          | 253039_at   | 0.9 |
| guanine nucleotide-exchange protein -like guanine nucleotide-exchange protein -Bos taurus,PID:g2674107                                              | 253032_at   | 0.9 |
| hypothetical protein                                                                                                                                | 252960_at   | 0.9 |
| putative protein vsf-1 protein, Lycopersicon esculentum, PIR2:S52203; supported by cDNA: gi_15100048_gb_AF401297.1_AF401297                         | 252969_at   | 0.9 |
| 2-dehydro-3-deoxyphosphoheptonate aldolase ; supported by cDNA: gi_166687_gb_M74819.1_ATHDHS1                                                       | 252831_at   | 0.9 |
| carboxypeptidase precursor-like protein carboxypeptidase Y-like protein, Arabidopsis thaliana, EMBL:M81130; supported by cDNA: gi_15215795_gb       | 252606_at   | 0.9 |
| hypothetical protein several hypothetical proteins - Arabidopsis thaliana                                                                           | 252473_s_at | 0.9 |
| arm repeat containing protein homolog arm repeat containing protein - Brassica napus, EMBL:AF024625; supported by cDNA: gi_14596006_gb_AY           | 252486_at   | 0.9 |
| putative protein finger protein SIG1, Saccharomyces cerevisiae, PIR2:A56015;supported by full-length cDNA: Ceres:122162.                            | 252371_at   | 0.9 |
| hypothetical protein                                                                                                                                | 252362_at   | 0.9 |
| GTPase activating -like protein GTPase activating protein gyp7, Yarrowia lipolytica, EMBL:YLGYP7                                                    | 252310_at   | 0.9 |
| putative protein ;supported by full-length cDNA: Ceres:26235.                                                                                       | 252269_at   | 0.9 |
| hypothetical protein ; supported by cDNA: gi_16604640_gb_AY059765.1_                                                                                | 252171_at   | 0.9 |
| putative protein saposin precursor - Homo sapiens, PIR:SAHUP;supported by full-length cDNA: Ceres:93651.                                            | 252075_at   | 0.9 |
| gamma response I protein ; supported by cDNA: gi_14335159_gb_AY037259.1_                                                                            | 252038_at   | 0.9 |
| putative protein growth-regulating factor 1, Oryza sativa, EMBL:AF201895                                                                            | 252015_at   | 0.9 |
| Gluthatione reductase, chloroplast precursor ; supported by cDNA: gi_15451193_gb_AY054677.1_                                                        | 251860_at   | 0.9 |
| Expressed protein ; supported by full-length cDNA: Ceres: 102807.                                                                                   | 251813_at   | 0.9 |
| vacuolar protein sorting protein 33a-like protein vacuolar protein sorting protein 33a, Rattus norvegicus ,PIR2:JC5720; supported by cDNA: gi_1389; | 251818_at   | 0.9 |
| spliceosomal - like protein spliceosomal protein SAP 130, Homo sapiens, EMBL:HSAJ1443                                                               | 251837_s_at | 0.9 |
| phosphatase - like protein DUAL SPECIFICITY PROTEIN PHOSPHATASE 5, Rattus norvegicus, SWISSPROT:DUS5_RAT; supported by cDNA: g                      | 251786_at   | 0.9 |
| villin 3 fragment ; supported by cDNA: gi_3415116_gb_AF081203.1_AF081203                                                                            | 251629_at   | 0.9 |
| zinc finger-like protein several zinc finger proteins - Arabidopsis thaliana                                                                        | 251586_at   | 0.9 |
| putative protein several serine/threonine-specific protein kinases                                                                                  | 251526_at   | 0.9 |
| protein synthesis initiation factor - like eukaryotic protein synthesis initiation factor, Homo sapiens, EMBL:AF104913                              | 251431_at   | 0.9 |
| putative protein                                                                                                                                    | 251415_at   | 0.9 |
| actin - like protein actin 3, Drosophila melanogaster, PIR:A03000;supported by full-length cDNA: Ceres:38096.                                       | 251340_at   | 0.9 |
| putative protein phosphoprotein phosphatase (EC 3.1.3.16) 1A-alpha - Homo sapiens, PIR:S22423;supported by full-length cDNA: Ceres:20050.           | 251259_at   | 0.9 |
| putative tDP-glucose 4-6-dehydratase contains non-consensus AT donor splice site at exon 1 and non-consensus AC acceptor splice site at exon 2      | 251234_s_at | 0.9 |
| ribonuclease II-like protein ribonuclease II family protein, Deinococcus radiodurans, PIR:C75571                                                    | 251040_at   | 0.9 |
| ABC transporter -like protein NBD-like protein POP, Arabidopsis thaliana, EMBL:AF127664;supported by full-length cDNA: Ceres:21701.                 | 251020_at   | 0.9 |
| putative protein ; supported by cDNA: gi_14596134_gb_AY042855.1_                                                                                    | 250898_at   | 0.9 |
| F1F0-ATPase inhibitor - like protein F1F0-ATPase inhibitor protein, OsIF1-1, Oryza sativa, EMBL:AB029059; supported by full-length cDNA: Ceres:     | 250863_at   | 0.9 |
| unknown protein                                                                                                                                     | 250822_at   | 0.9 |
| unknown protein ;supported by full-length cDNA: Ceres:150381.                                                                                       | 250792_at   | 0.9 |
| splicing factor 3a ; supported by cDNA: gi_14532639_gb_AY039944.1_                                                                                  | 250715_at   | 0.9 |
| putative protein similar to unknown protein (gb)AAF32477.1);supported by full-length cDNA: Ceres:117588.                                            | 250737_at   | 0.9 |



|                                                                                                                                                  |             |     |
|--------------------------------------------------------------------------------------------------------------------------------------------------|-------------|-----|
| transcription factor HBP-1b homolog (sp P43273) ; supported by cDNA: gi_217826_dbj_D10042.1_ATHAHBP1B                                            | 250671_at   | 0.9 |
| WD-repeat protein-like ; supported by cDNA: gi_15450909_gb_AY054535.1_                                                                           | 250539_at   | 0.9 |
| cellulose synthase catalytic subunit                                                                                                             | 250505_at   | 0.9 |
| cytochrome P450 - like protein cytochrome P450, Helianthus tuberosus, EMBL:HTCYP81L                                                              | 250423_s_at | 0.9 |
| putative protein TH65 protein, Arabidopsis thaliana, EMBL:AJ001729                                                                               | 250429_at   | 0.9 |
| beta-adaptin-like protein A ; supported by cDNA: gi_7385050_gb_AF216385.1_AF216385                                                               | 250352_at   | 0.9 |
| putative esterase - like protein cini protein - imported, Butyrivibrio fibrisolvens, PIR:T44624;supported by full-length cDNA: Ceres:7912.       | 250299_at   | 0.9 |
| putative protein putative secreted protein SCF41.30c, Streptomyces coelicolor, EMBL:SCF41_30                                                     | 250268_s_at | 0.9 |
| putative protein GCN4-complementing protein, Arabidopsis thaliana, EMBL:AJ130878                                                                 | 250285_at   | 0.9 |
| putative protein weak homology with predicted proteins, Arabidopsis thaliana;supported by full-length cDNA: Ceres:21821.                         | 250233_at   | 0.9 |
| polynucleotide phosphorylase                                                                                                                     | 250196_at   | 0.9 |
| UDP-glucose pyrophosphorylase ; supported by cDNA: gi_13430663_gb_AF360244.1_AF360244                                                            | 250074_at   | 0.9 |
| putative protein nuclear FMRP interacting protein 1 NUFIP1, Homo sapiens, EMBL:AF159548                                                          | 250009_at   | 0.9 |
| putative protein similar to unknown protein (dbj BAA92923.1)                                                                                     | 249899_at   | 0.9 |
| alpha-adaptin                                                                                                                                    | 249909_s_at | 0.9 |
| 26S proteasome, non-ATPase regulatory subunit ;supported by full-length cDNA: Ceres:23276.                                                       | 249796_at   | 0.9 |
| beta-glucosidase -like protein prunasin hydrolase isoform PHA precursor, Prunus serotina, EMBL:AF221526                                          | 249636_at   | 0.9 |
| putative protein SIAH1 protein, Brassica napus, EMBL:BNA245479                                                                                   | 249595_at   | 0.9 |
| putative protein similar to unknown protein (sp P54493)                                                                                          | 249510_at   | 0.9 |
| raffinose synthase -like protein raffinose synthase Rfs, Cucumis sativus, EMBL:AF073744                                                          | 249411_at   | 0.9 |
| unknown protein                                                                                                                                  | 249315_at   | 0.9 |
| glutathione transferase AtGST 10 (emb CAA10457.1) ; supported by cDNA: gi_15451157_gb_AY054659.1_                                                | 249291_at   | 0.9 |
| folypolyglutamate synthase-like protein                                                                                                          | 249304_at   | 0.9 |
| unknown protein ; supported by cDNA: gi_15081800_gb_AY048293.1_                                                                                  | 249308_at   | 0.9 |
| FtsH protease, putative similar to FtsH protease Gl:13183728 from [Medicago sativa]                                                              | 249244_at   | 0.9 |
| putative protein similar to unknown protein (pir S76082)                                                                                         | 249193_at   | 0.9 |
| putative protein similar to unknown protein (sp P42251); supported by cDNA: gi_13430795_gb_AF360310.1_AF360310                                   | 249201_at   | 0.9 |
| unknown protein ;supported by full-length cDNA: Ceres:1558.                                                                                      | 249204_at   | 0.9 |
| berberine bridge enzyme-like protein                                                                                                             | 249047_at   | 0.9 |
| unknown protein ;supported by full-length cDNA: Ceres:21404.                                                                                     | 249007_at   | 0.9 |
| putative protein similar to unknown protein (pir T08416)                                                                                         | 248944_at   | 0.9 |
| disease resistance protein-like                                                                                                                  | 248890_at   | 0.9 |
| AP47 50p (gb AAB88283.1) ; supported by cDNA: gi_14326519_gb_AF385713.1_AF385713                                                                 | 248858_at   | 0.9 |
| putative protein similar to unknown protein (dbj BAA90625.1)                                                                                     | 248805_at   | 0.9 |
| putative protein contains similarity to unknown protein (pir T39016);supported by full-length cDNA: Ceres:15623.                                 | 248757_at   | 0.9 |
| putative protein similar to unknown protein (pir H71431);supported by full-length cDNA: Ceres:31680.                                             | 248763_at   | 0.9 |
| protein kinase (EC 2.7.1.37) 5 (pir JN0505) ; supported by cDNA: gi_15809918_gb_AY054227.1_                                                      | 248720_at   | 0.9 |
| unknown protein                                                                                                                                  | 248737_at   | 0.9 |
| unknown protein                                                                                                                                  | 248694_at   | 0.9 |
| receptor protein kinase                                                                                                                          | 248590_at   | 0.9 |
| putative protein contains similarity to alpha/beta hydrolase; supported by cDNA: gi_13877626_gb_AF370514.1_AF370514                              | 248531_at   | 0.9 |
| putative protein contains similarity to salt-inducible protein                                                                                   | 248547_at   | 0.9 |
| putative protein strong similarity to unknown protein (gb AAD25781.1)                                                                            | 248497_at   | 0.9 |
| putative protein contains similarity to poly(A)-binding protein II;supported by full-length cDNA: Ceres:10876.                                   | 248447_at   | 0.9 |
| cytochrome P450                                                                                                                                  | 248353_at   | 0.9 |
| prolyl tRNA synthetase                                                                                                                           | 248339_at   | 0.9 |
| Notchless protein homolog                                                                                                                        | 248326_at   | 0.9 |
| Avr9 elicitor response protein-like ; supported by cDNA: gi_14423409_gb_AF386942.1_AF386942                                                      | 248262_at   | 0.9 |
| putative protein similar to unknown protein (pir T34137)                                                                                         | 248266_at   | 0.9 |
| importin beta                                                                                                                                    | 248268_at   | 0.9 |
| 26S proteasome regulatory particle chain RPT6-like protein ;supported by full-length cDNA: Ceres:38213.                                          | 248220_at   | 0.9 |
| trigger factor-like protein                                                                                                                      | 248094_at   | 0.9 |
| myosin heavy chain-like                                                                                                                          | 248032_at   | 0.9 |
| SNF1 related protein kinase-like protein ; supported by cDNA: gi_14334389_gb_AY034100.1_                                                         | 247867_at   | 0.9 |
| MAP kinase ; supported by cDNA: gi_14532571_gb_AY039910.1_                                                                                       | 247819_at   | 0.9 |
| Ran binding protein 1 homolog - like Ran binding protein 1 homolog, Arabidopsis thaliana, EMBL:ATU62742                                          | 247771_at   | 0.9 |
| FtsH protease, putative contains similarity to cell division protein FtsH homolog 3 SP:P73437 (EC 3.4.24.-) [strain PCC6803] [Synechocystis sp.] | 247766_at   | 0.9 |
| protein kinase 6 - like protein kinase 6, Glycine max, PIR:S29851; supported by cDNA: gi_17063197_gb_AY062096.1_                                 | 247750_at   | 0.9 |
| putative protein                                                                                                                                 | 247630_at   | 0.9 |
| putative protein flavin-containing monooxygenase FMO3, Oryctolagus cuniculus, SWISSPROT:FMO3_RABIT; supported by full-length cDNA Ceres          | 247577_at   | 0.9 |
| signal recognition particle - like protein signal recognition particle 68, Homo sapiens, EMBL:AF195951; supported by cDNA: gi_15293136_gb_AY05   | 247505_at   | 0.9 |
| Mei2-like protein Mei2-like protein, Arabidopsis thaliana, EMBL:D86122; supported by cDNA: gi_2443328_dbj_D86122.1_D86122                        | 247506_at   | 0.9 |
| putative protein various predicted proteins, Arabidopsis thaliana;supported by full-length cDNA: Ceres:14414.                                    | 247461_at   | 0.9 |
| plasma membrane proton ATPase-like                                                                                                               | 247439_at   | 0.9 |
| putative protein                                                                                                                                 | 247422_at   | 0.9 |
| putative protein contains similarity to receptor-like protein kinase;supported by full-length cDNA: Ceres:31105.                                 | 247383_at   | 0.9 |
| 2-nitropropane dioxygenase-like protein ;supported by full-length cDNA: Ceres:207555.                                                            | 247283_at   | 0.9 |
| putative protein strong similarity to unknown protein (emb CAB89363.1)                                                                           | 247265_at   | 0.9 |
| asparagine synthetase (gb AAC72837.1) ; supported by cDNA: gi_3859535_gb_AF095453.1_AF095453                                                     | 247218_at   | 0.9 |
| trehalose-6-phosphate phosphatase                                                                                                                | 247228_at   | 0.9 |
| PHD finger protein - like PHD finger protein 3, Homo sapiens, EMBL:AF091622                                                                      | 246893_at   | 0.9 |
| putative protein isopenicillin N epimerase, Streptomyces clavuligerus, EMBL:M32324                                                               | 246832_at   | 0.9 |
| glutamyl-tRNA synthetase ; supported by cDNA: gi_3435195_gb_AF067773.1_AF067773                                                                  | 246845_at   | 0.9 |
| Lon protease homolog 2 precursor almost identical to Lon protease homolog 2 mitochondrial precursor SP:P93655, Gl:1848290 from [Arabidopsis t    | 246850_at   | 0.9 |
| glutathione synthetase gsh2 non-consensus AT donor splice site at exon 6, AC acceptor splice site at exon 7; supported by cDNA: gi_758451_gb_U   | 246785_at   | 0.9 |
| cytochrome P450 ; supported by cDNA: gi_3164141_dbj_D78606.1_D78606                                                                              | 246620_at   | 0.9 |
| alpha-mannosidase -like protein mannosyl-oligosaccharide 1,3-1,6-alpha-mannosidase, mouse, PIR:A41641                                            | 246567_at   | 0.9 |
| putative protein hypothetical protein F14P3.15 - Arabidopsis thaliana, EMBL:AC009755                                                             | 246564_at   | 0.9 |
| Exportin1 (XPO1) protein ; supported by cDNA: gi_15810122_gb_AY056126.1_                                                                         | 246424_at   | 0.9 |
| root cap 1 (RCP1) ;supported by full-length cDNA: Ceres:10216.                                                                                   | 246434_at   | 0.9 |
| actin interacting protein ; supported by cDNA: gi_16604325_gb_AY058061.1_                                                                        | 246162_at   | 0.9 |
| putative protein predicted proteins - Arabidopsis thaliana                                                                                       | 246110_at   | 0.9 |
| zinc finger protein ;supported by full-length cDNA: Ceres:152664.                                                                                | 246069_at   | 0.9 |
| cinnamyl-alcohol dehydrogenase - like protein cinnamyl-alcohol dehydrogenase, apple tree, PIR:T16995;supported by full-length cDNA: Ceres:6748   | 246042_at   | 0.9 |
| alpha-galactosidase - like protein alpha-galactosidase, coffee, PIR:T50781                                                                       | 246055_at   | 0.9 |
| unknown protein contains similarity to anthranilate synthase large subunit Gl:1374671 from [Buchnera aphidicola]                                 | 245745_at   | 0.9 |
| dormancy-associated protein, putative similar to dormancy-associated protein Gl:2995990 from [Arabidopsis thaliana]; supported by cDNA: gi_1433  | 245668_at   | 0.9 |

|                                                                                                                                                               |             |     |
|---------------------------------------------------------------------------------------------------------------------------------------------------------------|-------------|-----|
| transcription factor like protein                                                                                                                             | 245480_at   | 0.9 |
| hypothetical protein                                                                                                                                          | 245442_at   | 0.9 |
| indole-3-acetate beta-glucosyltransferase like protein ;supported by full-length cDNA: Ceres:35383.                                                           | 245352_at   | 0.9 |
| hypothetical protein ;supported by full-length cDNA: Ceres:39922.                                                                                             | 245365_at   | 0.9 |
| Expressed protein ; supported by full-length cDNA: Ceres: 95834.                                                                                              | 245306_at   | 0.9 |
| phytoene dehydrogenase precursor (phytoene desaturase) ; supported by cDNA: gi_14532765_gb_AY040007.1_                                                        | 245284_at   | 0.9 |
| Expressed protein ; supported by cDNA: gi_5764394_gb_AF159587.1_AF159587                                                                                      | 245256_at   | 0.9 |
| hypothetical protein predicted by genscan; similar to SP P34568 YNV5_CAEEL;supported by full-length cDNA: Ceres:8256.                                         | 245062_at   | 0.9 |
| ATPase III subunit                                                                                                                                            | 245026_at   | 0.9 |
| RNA polymerase beta subunit-2                                                                                                                                 | 244997_at   | 0.9 |
| putative RING3 protein                                                                                                                                        | 257352_at   | 0.9 |
| disease resistance protein, putative similar to disease resistance protein GB:AAC78591 GI:3894383 from [Lycopersicon esculentum]                              | 259421_at   | 0.9 |
| putative protein various predicted proteins, Arabidopsis thaliana                                                                                             | 253170_at   | 0.9 |
| unknown protein                                                                                                                                               | 263680_at   | 0.8 |
| nodule inception protein, putative similar to nodule inception protein GI:6448579 from (Lotus japonicus)                                                      | 259540_at   | 0.8 |
| unknown protein ; supported by cDNA: gi_14334819_gb_AY035083.1_                                                                                               | 258093_at   | 0.8 |
| unknown protein ; supported by full-length cDNA: Ceres: 118290.                                                                                               | 256232_at   | 0.8 |
| putative protein SP8 binding protein, Cucumis sativus, PIR2:JC6203                                                                                            | 253603_at   | 0.8 |
| copper transport protein - like protein copper transporter protein Arabidopsis thaliana.PID:g1082054                                                          | 252502_at   | 0.8 |
| protein phosphatase 2A 62 kDa B regulatory subunit (gb AAD45158.1) ; supported by cDNA: gi_5533378_gb_AF165429.1_AF165429                                     | 249081_at   | 0.8 |
| S-locus protein, putative similar to S-locus protein 5 GI:6069485 from [Brassica rapa]                                                                        | 246322_at   | 0.8 |
| receptor kinase, putative similar to CLV1 receptor kinase GB:AAB58929 GI:2160756 from [Arabidopsis thaliana]                                                  | 264537_at   | 0.8 |
| Arabidopsis thaliana /REF=U37281 /DEF=actin-2 mRNA, complete cds /LEN=1637 (-5, -M, -3 represent transcript regions 5 prime, Middle, and 3 pri-r2-At-Actin-IV | 267534_at   | 0.8 |
| Arabidopsis thaliana /REF=U37281.1 /DEF=actin-2 mRNA, complete cds /LEN=1637 (_5, _M, _3 represent transcript regions 5 prime, Middle, and <-AthAl-Actin_     | 267550_at   | 0.8 |
| putative CCH-type zinc finger protein also an ankyrin-repeat protein; supported by cDNA: gi_14335105_gb_AY037232.1_                                           | 267534_at   | 0.8 |
| putative protein kinase contains a protein kinase domain profile (PDOC00100)                                                                                  | 267550_at   | 0.8 |
| putative beta-galactosidase ; supported by cDNA: gi_14517398_gb_AY039534.1_                                                                                   | 267556_at   | 0.8 |
| putative cytochrome P450                                                                                                                                      | 267500_s_at | 0.8 |
| unknown protein ;supported by full-length cDNA: Ceres:35578.                                                                                                  | 267504_at   | 0.8 |
| putative receptor-like protein kinase                                                                                                                         | 267490_at   | 0.8 |
| putative beta-glucosidase                                                                                                                                     | 267392_at   | 0.8 |
| hypothetical protein predicted by graal and genscan                                                                                                           | 267396_at   | 0.8 |
| citrate synthase similar to GB:X17528, 10 possible frameshifts in that submission.;supported by full-length cDNA: Ceres:16528.                                | 267368_at   | 0.8 |
| Expressed protein ; supported by full-length cDNA: Ceres: 123915.                                                                                             | 267036_at   | 0.8 |
| putative myosinase-binding protein ;supported by full-length cDNA: Ceres:39069.                                                                               | 266989_at   | 0.8 |
| unknown protein                                                                                                                                               | 266963_at   | 0.8 |
| putative phospholipase                                                                                                                                        | 266977_at   | 0.8 |
| unknown protein ;supported by full-length cDNA: Ceres:39666.                                                                                                  | 266848_at   | 0.8 |
| unknown protein                                                                                                                                               | 266858_at   | 0.8 |
| F-box protein family, AIFB5 contains similarity to F-box protein FBL2 GI:6010699 from [Rattus norvegicus]                                                     | 266815_at   | 0.8 |
| putative AAA-type ATPase                                                                                                                                      | 266777_at   | 0.8 |
| predicted by genscan                                                                                                                                          | 266796_at   | 0.8 |
| unknown protein                                                                                                                                               | 266758_at   | 0.8 |
| similar to late embryogenesis abundant proteins                                                                                                               | 266728_at   | 0.8 |
| putative N-acetyl-gamma-glutamyl-phosphate reductase ; supported by cDNA: gi_16604367_gb_AY058082.1_                                                          | 266704_at   | 0.8 |
| putative glyoxysomal malate dehydrogenase precursor ; supported by cDNA: gi_16226836_gb_AF428346.1_AF428346                                                   | 266457_at   | 0.8 |
| putative clathrin binding protein (epsin)                                                                                                                     | 266436_at   | 0.8 |
| putative ubiquitin activating enzyme                                                                                                                          | 266333_at   | 0.8 |
| Mutator-like transposase similar to MURA transposase of maize Mutator transposon; supported by cDNA: gi_15982768_gb_AY057491.1_                               | 266318_at   | 0.8 |
| putative proline-rich protein                                                                                                                                 | 266283_at   | 0.8 |
| putative leucine aminopeptidase identical to GB:X63444; supported by cDNA: gi_14334665_gb_AY035006.1_                                                         | 265996_at   | 0.8 |
| putative nucleosome assembly protein                                                                                                                          | 265940_at   | 0.8 |
| hypothetical protein predicted by genscan and genefinder                                                                                                      | 265764_at   | 0.8 |
| putative DNA topoisomerase III beta                                                                                                                           | 265727_at   | 0.8 |
| hypothetical protein predicted by genscan                                                                                                                     | 265697_at   | 0.8 |
| 70kD heat shock protein ;supported by full-length cDNA: Ceres:98979.                                                                                          | 265675_at   | 0.8 |
| unknown protein predicted by genscan                                                                                                                          | 265691_at   | 0.8 |
| putative C2H2-type zinc finger protein likely a nucleic acid binding protein; supported by cDNA: gi_4585204_gb_AF095588.1_AF095588                            | 265662_at   | 0.8 |
| CDC27/NUC2-like protein TPR-repeat protein                                                                                                                    | 265585_at   | 0.8 |
| putative cellular apoptosis susceptibility protein                                                                                                            | 265453_at   | 0.8 |
| hypothetical protein predicted by genscan                                                                                                                     | 265455_at   | 0.8 |
| unknown protein ;supported by full-length cDNA: Ceres:108956.                                                                                                 | 265384_at   | 0.8 |
| hypothetical protein predicted by genscan;supported by full-length cDNA: Ceres:37455.                                                                         | 265192_at   | 0.8 |
| Rubisco subunit binding-protein beta subunit identical to chaperonin 60 beta precursor GB:JT0901 from [Arabidopsis thaliana]; supported by cDNA: {            | 265076_at   | 0.8 |
| hypothetical protein Similar to human BC-2 protein; Similar to human BC-2 protein, gij2828147; supported by cDNA: gi_15529227_gb_AY052238.1_                  | 265044_at   | 0.8 |
| putative chloroplast membrane protein, ALBINO3 similar to GB:AAB61458                                                                                         | 265011_at   | 0.8 |
| hypothetical protein predicted by genemark.hmm; supported by cDNA: gi_13926194_gb_AF370571.1_AF370571                                                         | 264959_at   | 0.8 |
| clathrin adaptor medium chain protein MU1B, putative similar to clathrin adaptor medium chain protein MU1B GI:4704421 from [Mus musculus]                     | 264914_at   | 0.8 |
| pyruvate dehydrogenase E1 alpha subunit strongly similar to GB:AAD39331;supported by full-length cDNA: Ceres:41337.                                           | 264871_at   | 0.8 |
| hypothetical protein similar to hypothetical protein GB:O14360                                                                                                | 264818_at   | 0.8 |
| putative protein kinase similar to MAP3K delta-1 protein kinase (Y14199); supported by cDNA: gi_11127924_gb_AF305913.1_AF305913                               | 264780_at   | 0.8 |
| putative leucyl-tRNA synthetase Strong similarity to S. pombe leucyl-tRNA synthetase (gb Z73100)                                                              | 264705_at   | 0.8 |
| putative 2,3-bisphosphoglycerate-independent phosphoglycerate mutase Strong similarity to R. communis phosphoglycerate mutase (gb X70652). E                  | 264668_at   | 0.8 |
| Expressed protein ; supported by full-length cDNA: Ceres: 6319.                                                                                               | 264673_at   | 0.8 |
| unknown protein EST gb R64758 comes from this gene; supported by cDNA: gi_15450400_gb_AY052301.1_                                                             | 264676_at   | 0.8 |
| putative U2 small nuclear ribonucleoprotein A (U2 SNRNP-A) Identical to A. thaliana U2 SNRNP-specific A protein (gb X69137). ESTs gb ATTS070                  | 264678_at   | 0.8 |
| unknown protein ; supported by cDNA: gi_13430645_gb_AF360235.1_AF360235                                                                                       | 264615_at   | 0.8 |
| hypothetical protein predicted by genemark.hmm                                                                                                                | 264428_at   | 0.8 |
| putative pyrophosphate-fructose-6-phosphate 1-phosphotransferase similar to pyrophosphate-dependent phosphofuctokinase beta subunit gb Z328:                  | 264386_at   | 0.8 |
| unknown protein Contains similarity to gb AB011110 KIAA0538 protein from Homo sapiens brain and to phospholipid-binding domain C2 PF 00168. I                 | 264351_at   | 0.8 |
| hypothetical protein similar to hypothetical protein GI:5541664 from [Arabidopsis thaliana]                                                                   | 264308_at   | 0.8 |
| unknown protein ;supported by full-length cDNA: Ceres:16387.                                                                                                  | 264286_at   | 0.8 |
| unknown protein ; supported by cDNA: gi_15081790_gb_AY048288.1_                                                                                               | 264265_at   | 0.8 |
| unknown protein ESTs gb Z34075, gb Z34835 and gb AA404888 come from this gene                                                                                 | 264198_at   | 0.8 |
| putative topoisomerase strong similarity to GB:CAA72903 from [Arabidopsis thaliana]; supported by cDNA: gi_14334597_gb_AY034972.1_                            | 264206_at   | 0.8 |
| hypothetical protein contains similarity to chloroplast membrane-associated protein IM30 GI:169106 from [Pisum sativum];supported by full-length cD           | 264158_at   | 0.8 |
| unknown protein Similar to yeast general negative regulator of transcription subunit 1; Location of ESTs gb T44328 and gb AA395265                            | 264168_at   | 0.8 |

|                                                                                                                                                                  |             |     |
|------------------------------------------------------------------------------------------------------------------------------------------------------------------|-------------|-----|
| unknown protein                                                                                                                                                  | 264172_at   | 0.8 |
| unknown protein ; supported by cDNA: gi_15450672_gb_AY052704.1_                                                                                                  | 264123_at   | 0.8 |
| unknown protein                                                                                                                                                  | 264118_at   | 0.8 |
| putative rubisco subunit binding-protein alpha subunit ;supported by full-length cDNA: Ceres:25773.                                                              | 264069_at   | 0.8 |
| putative pyrophosphate-fructose-6-phosphate 1-phosphotransferase                                                                                                 | 264044_at   | 0.8 |
| unknown protein                                                                                                                                                  | 264011_at   | 0.8 |
| putative ABC transporter related to multi drug resistance proteins and P-glycoproteins                                                                           | 263904_at   | 0.8 |
| putative WD-40 repeat protein                                                                                                                                    | 263824_at   | 0.8 |
| putative cyclic nucleotide-regulated ion channel protein                                                                                                         | 263776_s_at | 0.8 |
| putative cyclic nucleotide-regulated ion channel protein                                                                                                         | 263777_at   | 0.8 |
| putative homeodomain transcription factor ; supported by cDNA: gi_15983780_gb_AY056796.1_                                                                        | 263557_at   | 0.8 |
| unknown protein                                                                                                                                                  | 263457_at   | 0.8 |
| putative methylmalonate semi-aldehyde dehydrogenase                                                                                                              | 263275_at   | 0.8 |
| putative fructokinase ; supported by full-length cDNA: Ceres: 17664.                                                                                             | 263250_at   | 0.8 |
| hypothetical protein predicted by genscan                                                                                                                        | 263200_at   | 0.8 |
| T76725 come from this gene.                                                                                                                                      | 263010_at   | 0.8 |
| hypothetical protein contains similarity to DNA-binding protein (PcMYB1) GI:2224896 from [Petroselinum crispum]                                                  | 263007_at   | 0.8 |
| endo-beta-1,4-glucanase, putative similar to endo-beta-1,4-glucanase GB:AAC12685 GI:3025470 from [Pinus radiata];supported by full-length cDN/                   | 262980_at   | 0.8 |
| hypothetical protein predicted by genemark.hmm                                                                                                                   | 262941_at   | 0.8 |
| hypothetical protein contains similarity to transcriptional repressor SIN3B GI:2921547 from [Mus musculus]                                                       | 262900_at   | 0.8 |
| auxin response factor 1 identical to auxin response factor 1 GI:2245378 from [Arabidopsis thaliana]; supported by cDNA: gi_2245377_gb_U83245.1_                  | 262914_at   | 0.8 |
| unknown protein ; supported by cDNA: gi_16612297_gb_AF439842.1_AF439842                                                                                          | 262849_at   | 0.8 |
| hypothetical protein similar to hypothetical protein GB:AAD39278 GI:5080768 from (Arabidopsis thaliana)                                                          | 262662_at   | 0.8 |
| 4-hydroxyphenylpyruvate dioxygenase (HPD) identical to 4-hydroxyphenylpyruvate dioxygenase (HPD) SP:P93836 [Arabidopsis thaliana (Mouse-ear)]                    | 262635_at   | 0.8 |
| hypothetical protein predicted by genscan+                                                                                                                       | 262532_at   | 0.8 |
| unknown protein Similar to gb X84260 POS5 gene product from Saccharomyces cerevisiae. EST gb W43879 comes from this gene; supported by cDNA                      | 262506_at   | 0.8 |
| hypothetical protein similar to hypothetical protein GB:AAD50048 GI:5734783 from [Arabidopsis thaliana]                                                          | 262471_at   | 0.8 |
| deaminase, putative similar to cytidine/deoxycytidylyate deaminase family protein GB:AAF73539 GI:8163170 from [Chlamydia muridarum]                              | 262274_at   | 0.8 |
| unknown protein                                                                                                                                                  | 262280_at   | 0.8 |
| hypothetical protein predicted by genscan+; supported by cDNA: gi_14517529_gb_AY039600.1_                                                                        | 262248_at   | 0.8 |
| hypothetical protein predicted by genscan+                                                                                                                       | 262208_at   | 0.8 |
| unknown protein contains similarity to WD-40 repeat protein GI:4519417 from [Homo sapiens]                                                                       | 262145_at   | 0.8 |
| late embryogenesis abundant protein, putative similar to late embryogenesis abundant protein 5 GI:2981167 from [Nicotiana tabacum];supported by full-length cDNA | 262113_at   | 0.8 |
| SAR DNA binding protein, putative similar to SAR DNA binding protein GB:BAA31260 GI:3288883 from [Oryza sativa];supported by full-length cDN                     | 262094_at   | 0.8 |
| flavin-containing monooxygenase FMO3, putative similar to flavin-containing monooxygenase FMO3 GI:349533 from [Oryctolagus cuniculus]                            | 261913_at   | 0.8 |
| protein serine/threonine phosphatase alpha, putative similar to protein serine/threonine phosphatase alpha GB:AAC69437 GI:3811109 from [Plasmidium               | 261743_s_at | 0.8 |
| 2-isopropylmalate synthase, putative similar to 2-isopropylmalate synthase GB:AF004165 GI:2213881 from [Lycopersicon pennellii]                                  | 261668_at   | 0.8 |
| unknown protein                                                                                                                                                  | 261674_at   | 0.8 |
| hypothetical protein similar to hypothetical protein GB:AAD22292 GI:6598654 from [Arabidopsis thaliana]                                                          | 261681_at   | 0.8 |
| dimethyladenosine transferase, putative similar to dimethyladenosine transferase GB:AAC09322 GI:3005590 from [Arabidopsis thaliana]                              | 261652_at   | 0.8 |
| unknown protein contains similarity to formin binding protein GB:AAC34811 GI:3550080 from [Homo sapiens]                                                         | 261604_at   | 0.8 |
| serine/threonine kinase, putative similar to serine/threonine kinase GB:CAA73067.1 GI:2632252 from [Sorghum bicolor]; supported by cDNA: gi_144                  | 261581_at   | 0.8 |
| unknown protein                                                                                                                                                  | 261540_at   | 0.8 |
| receptor-like serine/threonine kinase, putative similar to GB:AAC50043 from [Arabidopsis thaliana] (Plant Mol. Biol. 37 (4), 587-596 (1998))                     | 261434_at   | 0.8 |
| unknown protein;supported by full-length cDNA: Ceres:120232.                                                                                                     | 261413_at   | 0.8 |
| unknown protein                                                                                                                                                  | 261424_at   | 0.8 |
| transcription factor, putative similar to GB:X92369 from [Antirrhinum majus];supported by full-length cDNA: Ceres:12071.                                         | 261375_at   | 0.8 |
| phytochrome A suppressor spa1, putative similar to GB:4809171 from [Arabidopsis thaliana]; supported by cDNA: gi_14532797_gb_AY040023.1_                         | 261319_at   | 0.8 |
| protein kinase, putative similar to many predicted protein kinases                                                                                               | 261339_at   | 0.8 |
| unknown protein ;supported by full-length cDNA: Ceres:158528.                                                                                                    | 261253_at   | 0.8 |
| unknown protein ; supported by cDNA: gi_13605832_gb_AF367315.1_AF367315                                                                                          | 261231_at   | 0.8 |
| peroxisomal targeting signal type 2 receptor ; supported by cDNA: gi_15215675_gb_AY050366.1_                                                                     | 261207_at   | 0.8 |
| homeodomain protein, putative similar to homeodomain protein GI:7239157 from (Malus domestica)                                                                   | 261139_at   | 0.8 |
| unknown protein ;supported by full-length cDNA: Ceres:37370.                                                                                                     | 261033_at   | 0.8 |
| transcription factor MYC7E, putative similar to transcription factor MYC7E GB:AAD15818 GI:4321762 from [Zea mays]                                                | 261050_at   | 0.8 |
| histidine decarboxylase, putative similar to histidine decarboxylase GB:BAA78331 GI:4996105 from [Brassica napus]; supported by cDNA: gi_15011                   | 260814_at   | 0.8 |
| unknown protein ;supported by full-length cDNA: Ceres:114093.                                                                                                    | 260793_at   | 0.8 |
| unknown protein contains similarity to apoptotic cell clearance receptor PtdSerR GI:11037740 from [Mus musculus]                                                 | 260798_at   | 0.8 |
| unknown protein ;supported by full-length cDNA: Ceres:41461.                                                                                                     | 260665_at   | 0.8 |
| very-long-chain fatty acid condensing enzyme CUT1, putative similar to GB:AAD37122 from [Arabidopsis thaliana];supported by full-length cDNA: C                  | 260667_at   | 0.8 |
| translation elongation factor EF-1 alpha identical to GB:AAB07881 from [Arabidopsis thaliana] (Mol. Gen. Genet. 219 (1-2), 106-112 (1989))                       | 260677_at   | 0.8 |
| unknown protein contains similarity to tub homolog GI:2072160 from [Homo sapiens]; supported by cDNA: gi_13877766_gb_AF370146.1_AF370146                         | 260588_at   | 0.8 |
| unknown protein                                                                                                                                                  | 260596_at   | 0.8 |
| putative villin 2                                                                                                                                                | 260521_at   | 0.8 |
| mannosyl-oligosaccharide alpha-1,2-mannosidase, putative similar to mannosyl-oligosaccharide alpha-1,2-mannosidase (Mus musculus) GI:474280                      | 260520_at   | 0.8 |
| unknown protein                                                                                                                                                  | 260436_at   | 0.8 |
| putative RNA-binding domain contains Pfam profile: PF00806 Pumilio-family RNA binding domains (aka PUM-HD, Pumilio homology domain) (5 co                        | 260398_at   | 0.8 |
| putative RING zinc finger protein Pfam HMM hit: zinc finger, C3HC4 type (RING finger)                                                                            | 260321_at   | 0.8 |
| putative glycerophosphodiester phosphodiesterase similar to glycerophosphoryl diester phosphodiesterase GB:AAF12f49 from [Deinococcus radiodurans]               | 260254_at   | 0.8 |
| unknown protein ; supported by cDNA: gi_13878054_gb_AF370290.1_AF370290                                                                                          | 260157_at   | 0.8 |
| putative protein phosphatase 2C similar to protein phosphatase 2C GB:CAA72341 [Medicago sativa]; contains Pfam profile: PF00481 Protein phosphatase 2C           | 260057_at   | 0.8 |
| unknown protein                                                                                                                                                  | 259934_at   | 0.8 |
| putative exportin, tRNA (nuclear export receptor for tRNAs) similar to exportin, tRNA (nuclear export receptor for tRNAs) GB:6005954 [Homo sapiens]              | 259919_at   | 0.8 |
| leucine-rich receptor-like protein kinase, putative similar to GI:3641252 from [Malus x domestica] (Plant Mol. Biol. 40 (6), 945-957 (1999))                     | 259848_at   | 0.8 |
| acetyl-CoA synthetase, putative similar to protein contained within GB:AE000782 from [Archaeoglobus fulgidus]                                                    | 259647_at   | 0.8 |
| Expressed protein ; supported by cDNA: gi_14532525_gb_AY039887.1_                                                                                                | 259416_at   | 0.8 |
| GTP-binding protein(RAB11D), putative similar to RAB11D GI:1370148 from [Lotus japonicus]; supported by cDNA: gi_12083263_gb_AF332428.1_                         | 259395_at   | 0.8 |
| putative polynucleotide phosphorylase similar to polynucleotide phosphorylase GB:AAC50039 (Pisum sativum), identical to putative polynucleotide phosphorylase    | 259344_at   | 0.8 |
| Snf1-related protein kinase KIN10 (AKIN10) identical to Snf1-related protein kinase, KIN10 SP:Q38997 from [Arabidopsis thaliana]                                 | 259319_at   | 0.8 |
| putative porin similar to outer mitochondrial membrane porin (voltage-dependent anion-selective channel protein) (VDAC) (POM 34) GB:P42055 (So                   | 259270_at   | 0.8 |
| putative DNA gyrase subunit B similar to putative DNA gyrase subunit GB:O50627 [Bacillus halodurans]                                                             | 259138_s_at | 0.8 |
| unknown protein similar to hypothetical proteins: GB:AAB61107 [Arabidopsis thaliana], GB:AAC00578, [Arabidopsis thaliana]                                        | 259117_at   | 0.8 |
| DegP protease contains similarity to degP GI:2623992 from [Bradyrhizobium japonicum]                                                                             | 259048_at   | 0.8 |
| unknown protein similar to CGI-86 protein GB:AAD34081 [Homo sapiens], HMM hit: Alcohol/other dehydrogenases, short chain type                                    | 259051_at   | 0.8 |
| unknown protein ;supported by full-length cDNA: Ceres:32811.                                                                                                     | 259039_at   | 0.8 |
| putative DNA gyrase subunit A similar to DNA gyrase A subunit GB:BAA10380 [Synechocystis sp]                                                                     | 258966_at   | 0.8 |
| unknown protein N-terminus similar to unknown protein GB:AAD25613 [Arabidopsis thaliana]; supported by full-length cDNA: Ceres: 38529.                           | 258921_at   | 0.8 |

|                                                                                                                                                                |             |     |
|----------------------------------------------------------------------------------------------------------------------------------------------------------------|-------------|-----|
| hypothetical protein predicted by gencan+;supported by full-length cDNA: Ceres:101876.                                                                         | 258878_at   | 0.8 |
| putative glucan synthase similar to glucan synthase GB:AAD11794 [Filobasidiella neoformans var. neoformans]                                                    | 258826_at   | 0.8 |
| unknown protein ;supported by full-length cDNA: Ceres:320.                                                                                                     | 258771_at   | 0.8 |
| putative RING zinc finger protein contains Pfam profile: PF00097 zinc finger, C3HC4 type (RING finger); supported by full-length cDNA: Ceres: 387              | 258714_at   | 0.8 |
| importin alpha identical to GB:AAC27644 from [Arabidopsis thaliana] (Plant Cell (1996) 8(8), 1337-1352);supported by full-length cDNA: Ceres:9351              | 258531_at   | 0.8 |
| kinesin-like protein similar to mitotic centromere-associated kinesin GB:AAC27660 from [Homo sapiens]; supported by cDNA: gi_15810128_gb_AY0                   | 258381_at   | 0.8 |
| DNA-binding protein contains AP2 domain, identical to AP2 domain containing protein RAP2.2 from GB:AAC49768 from [Arabidopsis thaliana];supp                   | 258366_at   | 0.8 |
| methyltransferase, putative similar to methyltransferase GB:AAC01738 from [Amycolatopsis mediterranei]                                                         | 258218_at   | 0.8 |
| putative protein kinase similar to serine/threonine protein kinase Pto GB:AAB47421 [Lycopersicon esculentum] (Plant Cell 9 (1), 61-73 (1997))                  | 258173_at   | 0.8 |
| unknown protein                                                                                                                                                | 258101_at   | 0.8 |
| hypothetical protein predicted by genemark.hmm                                                                                                                 | 258051_at   | 0.8 |
| putative UDP-glucose glucosyltransferase similar to GB:Q40284 from [Manihot esculenta]                                                                         | 257940_at   | 0.8 |
| hypothetical protein predicted by genemark.hmm                                                                                                                 | 257876_at   | 0.8 |
| E2, ubiquitin-conjugating enzyme, putative similar to ubiquitin conjugating enzyme GB:CAA51706 [Saccharomyces cerevisiae] (Nature 365 (6442),                  | 257893_at   | 0.8 |
| hypothetical protein contains Pfam profile: PF01535 domain of unknown function                                                                                 | 257838_at   | 0.8 |
| SNF1 related protein kinase (ATSRPK1) identical to SNF1 related protein kinase (ATSRPK1) GB:AB027153 [Arabidopsis thaliana]; supported by cDl                  | 257771_at   | 0.8 |
| chorismate mutase identical to chorismate mutase GB:Z26519 [Arabidopsis thaliana];supported by full-length cDNA: Ceres:39613.                                  | 257746_at   | 0.8 |
| unknown protein similar to negative regulator of COPII vesicle formation GB:NP_011162 from [Saccharomyces cerevisiae]                                          | 257709_at   | 0.8 |
| unknown protein ; supported by full-length cDNA: Ceres: 33530.                                                                                                 | 257703_at   | 0.8 |
| Expressed protein ; supported by full-length cDNA: Ceres: 12734.                                                                                               | 257657_at   | 0.8 |
| unknown protein contains Pfam profile: PF00400 WD domain, G-beta repeat; supported by cDNA: gi_15081810_gb_AY048298.1_                                         | 257661_at   | 0.8 |
| hypothetical protein predicted by genemark.hmm                                                                                                                 | 257260_at   | 0.8 |
| protein kinase, putative contains similarity to serine/threonine-protein kinase homolog GB:Q61136 from [Mus musculus], contains Pfam profile: PF0              | 256995_at   | 0.8 |
| subtilisin-like serine protease, putative contains similarity to cucumis-like serine protease GI:3176874 from [Arabidopsis thaliana]                           | 256997_at   | 0.8 |
| glycolate oxidase, putative similar to GB:999542 from [Spinacia oleracea] (J. Biol. Chem. 264 (6), 3624-3628 (1989)), contains Pfam profile: PF0107257004_s_at | 256963_at   | 0.8 |
| lysyl-tRNA synthetase, putative similar to GB:P73443 from [Synechocystis PCC6803], contains Pfam profile: PF00152 tRNA synthetases class II (D,                | 256889_at   | 0.8 |
| PHD-finger protein, putative contains Pfam profile: PF00628 PHD-finger;supported by full-length cDNA: Ceres:95660.                                             | 256848_at   | 0.8 |
| hypothetical protein similar to hypothetical protein GB:AAC80630 from [Arabidopsis thaliana]                                                                   | 256797_at   | 0.8 |
| DEAD box helicase protein, putative similar to DEAD box helicase protein GB:NP_006764 from [Homo sapiens], contains Pfam profile: PF00270 Df                   | 256624_at   | 0.8 |
| hypothetical protein predicted by genemark.hmm                                                                                                                 | 256534_at   | 0.8 |
| unknown protein                                                                                                                                                | 256491_at   | 0.8 |
| hypothetical protein contains similarity to glucose-repressible alcohol dehydrogenase transcriptional effector GI:3859723 from (Candida albicans)              | 256479_at   | 0.8 |
| unknown protein                                                                                                                                                | 256356_s_at | 0.8 |
| hypothetical protein                                                                                                                                           | 256230_at   | 0.8 |
| FKBP-type peptidyl-prolyl cis-trans isomerase, putative contains Pfam profile: PF00254 FKBP-type peptidyl-prolyl cis-trans isomerases                          | 256209_at   | 0.8 |
| electron transport flavoprotein, putative similar to electron transport flavoprotein [Homo sapiens] GI:182251                                                  | 256142_at   | 0.8 |
| hypothetical protein predicted by genemark.hmm;supported by full-length cDNA: Ceres:112350.                                                                    | 256074_at   | 0.8 |
| unknown protein ; supported by cDNA: gi_14532715_gb_AY039982.1_                                                                                                | 256068_at   | 0.8 |
| hypothetical protein contains similarity to peptidyl-prolyl cis-trans isomerase E GI:4406227 from [Homo sapiens]; supported by cDNA: gi_1498063_gi             | 256020_at   | 0.8 |
| glutamyl-tRNA reductase, putative similar to glutamyl-tRNA reductase GI:1694925 from [Cucumis sativus]                                                         | 255966_at   | 0.8 |
| 14-3-3 protein GF14epsilon (grf10) identical to 14-3-3 protein GF14 epsilon GI:5802798, SP:P48347 from [Arabidopsis thaliana];supported by full-le             | 255871_at   | 0.8 |
| putative small nuclear ribonucleoprotein U2B ; supported by full-length cDNA: Ceres:34995.                                                                     | 255818_at   | 0.8 |
| hypothetical protein predicted by genefinder and gencan;supported by full-length cDNA: Ceres:119054.                                                           | 255762_at   | 0.8 |
| unknown protein contains Pfam profile: PF02135 TAZ zinc finger                                                                                                 | 255740_at   | 0.8 |
| wall-associated kinase, putative similar to wall-associated kinase 1 GI:3549626 from [Arabidopsis thaliana]; supported by cDNA: gi_15529241_gb_A               | 255711_at   | 0.8 |
| putative WD repeat membrane protein ; supported by cDNA: gi_15912316_gb_AY056436.1_                                                                            | 255540_at   | 0.8 |
| putative SecA-type chloroplast protein transport factor non-consensus GA donor splice site at exon 4                                                           | 255543_at   | 0.8 |
| predicted protein of unknown function similar to bacterial tolB proteins but unclear if T7B11.13 is involved in viral transport                                | 255507_at   | 0.8 |
| putative hexose transporter similar to plant and fission yeast hexose (glucose) transporter proteins                                                           | 255507_at   | 0.8 |
| ATKAP alpha similar to ATKAP, GenBank accession number U69533; supported by cDNA: gi_14326480_gb_AF385693.1_AF385693                                           | 255380_at   | 0.8 |
| putative calcium channel ; supported by cDNA: gi_13786068_gb_AF360372.1_AF360372                                                                               | 255382_at   | 0.8 |
| putative pre-mRNA splicing factor similar to yeast pre-mRNA splicing factors; supported by cDNA: gi_16604550_gb_AY059720.1_                                    | 255296_at   | 0.8 |
| hypothetical protein                                                                                                                                           | 255240_at   | 0.8 |
| coded for by A. thaliana cDNA Z18000 ;supported by full-length cDNA: Ceres:38543.                                                                              | 255151_at   | 0.8 |
| putative protein oxysterol-binding protein - Oryctolagus cuniculus (domestic rabbit),PIR2:A34404                                                               | 255016_at   | 0.8 |
| sucrose-phosphate synthase - like protein sucrose-phosphate synthase, Zea mays, PIR2:JQ1329                                                                    | 255020_at   | 0.8 |
| isoleucine-tRNA ligase - like protein isoleucine-tRNA ligase, Homo sapiens, PIR2:I59314                                                                        | 254925_at   | 0.8 |
| beta-adaptin - like protein beta-adaptin -Homo sapiens,PID:g179333; supported by cDNA: gi_7385052_gb_AF216386.1_AF216386                                       | 254894_at   | 0.8 |
| putative phospholipase D-gamma phospholipase D-gamma - Arabidopsis thaliana,PID:g2653885                                                                       | 254734_at   | 0.8 |
| methionyl-tRNA synthetase - like protein methionyl-tRNA synthetase, Oryza sativa, AF040700                                                                     | 254691_at   | 0.8 |
| hypothetical protein ; supported by full-length cDNA: Ceres: 38412.                                                                                            | 254693_at   | 0.8 |
| bHLH protein - like bHLH protein, Arabidopsis thaliana, PATCHX:E255557                                                                                         | 254646_at   | 0.8 |
| putative protein                                                                                                                                               | 254580_at   | 0.8 |
| putative protein ; supported by cDNA: gi_14190356_gb_AF378856.1_AF378856                                                                                       | 254520_at   | 0.8 |
| potassium transporter-like protein putative potassium transporter AtKT2p & AtKT1p, Arabidopsis thaliana, Patchx:G2384669 & Patchx:G2384671                     | 254353_s_at | 0.8 |
| putative protein probable membrane protein YFR005c, Saccharomyces cerevisiae, PIR2:S56260                                                                      | 254227_at   | 0.8 |
| putative protein chS-Rex-b - Gallus gallus (chicken),gb:L10333;supported by full-length cDNA: Ceres:39185.                                                     | 254232_at   | 0.8 |
| tyrosine transaminase like protein tyrosine transaminase (EC 2.6.1.5) - rat, EMBL:X02741; supported by cDNA: gi_15076852_gb_AF268090.1_AF2                     | 254127_at   | 0.8 |
| NADPH-ferrihemoprotein reductase ATR1 ; supported by cDNA: gi_15451215_gb_AY054688.1_                                                                          | 254085_at   | 0.8 |
| abscisic acid-induced - like protein abscisic acid-induced protein HVA22, Hordeum vulgare, PIR2:A48892;supported by full-length cDNA: Ceres:285                | 253977_at   | 0.8 |
| putative protein various Caenorhabditis elegans predicted proteins                                                                                             | 253949_at   | 0.8 |
| grpE like protein ;supported by full-length cDNA: Ceres:35284.                                                                                                 | 253900_at   | 0.8 |
| translation initiation factor ; supported by full-length cDNA: Ceres: 5206.                                                                                    | 253876_at   | 0.8 |
| COP1-interacting protein 7 (CIP7) ; supported by cDNA: gi_3327867_dbj_AB012912.1_AB012912                                                                      | 253810_at   | 0.8 |
| putative NADH dehydrogenase NADH dehydrogenase (ubiquinone) (EC 1.6.5.3) chain NDI1 - yeast, PIR2:S26704;supported by full-length cDNA: C                      | 253770_at   | 0.8 |
| putative kinase ADK1-like protein protein kinase ADK1-Arabidopsis thaliana;supported by full-length cDNA: Ceres:113439.                                        | 253751_at   | 0.8 |
| hypothetical protein ;supported by full-length cDNA: Ceres:249331.                                                                                             | 253758_at   | 0.8 |
| Expressed protein ;supported by cDNA: gi_15983772_gb_AY056792.1_                                                                                               | 253705_at   | 0.8 |
| hexokinase ; supported by cDNA: gi_8567421_gb_U18754.2_ATU18754                                                                                                | 253709_at   | 0.8 |
| pyrophosphate-dependent phosphofructo-1-kinase-like protein pyrophosphate-dependent phosphofructo-1-kinase - Prunus armeniaca (apricot),PID:                   | 253698_at   | 0.8 |
| nucleotide pyrophosphatase - like protein nucleotide pyrophosphatase homolog, Oryza sativa, gb:T03293; supported by cDNA: gi_13877570_gb_Af                    | 253549_at   | 0.8 |
| Expressed protein ; supported by full-length cDNA: Ceres: 7876.                                                                                                | 253517_at   | 0.8 |
| predicted protein hypothetical protein sir1919, Synechocystis sp., PIR2:S75233                                                                                 | 253538_at   | 0.8 |
| putative protein ribosomal protein YmL14 precursor, mitochondrial - Saccharomyces cerevisiae,PIR2:S50921;supported by full-length cDNA: Ceres:                 | 253490_at   | 0.8 |
| methyltransferase - like protein methyltransferase DPH5, Saccharomyces cerevisiae, PIR2:S30890; supported by cDNA: gi_13605812_gb_AF3673                       | 253377_at   | 0.8 |
| putative protein NBS/LRR disease resistance protein (RFL1) - Arabidopsis thaliana,PID:g3309619                                                                 | 253331_at   | 0.8 |
| nucellin-like protein nucellin - Hordeum vulgare,PIR:G2290202;supported by full-length cDNA: Ceres:24738.                                                      |             |     |

|                                                                                                                                                  |             |     |
|--------------------------------------------------------------------------------------------------------------------------------------------------|-------------|-----|
| putative protein Caenorhabditis elegans cosmid, gene T16G1.11,PID:e1349366; supported by cDNA: gi_14335023_gb_AY037191.1_                        | 253336_at   | 0.8 |
| glucosyltransferase -like protein immediate-early salicylate-induced glucosyltransferase, Nicotiana tabacum, PIR:T03747;supported by cDNA gi:14  | 253268_s_at | 0.8 |
| xanthine dehydrogenase - like protein xanthine dehydrogenase, Gallus gallus, PIR:XOCHDH                                                          | 253212_s_at | 0.8 |
| putative protein ;supported by full-length cDNA: Ceres:21838.                                                                                    | 253171_at   | 0.8 |
| putative protein bZIP protein - Arabidopsis thaliana,PID:g600855                                                                                 | 253185_at   | 0.8 |
| NAD+ dependent isocitrate dehydrogenase subunit 1 ;supported by full-length cDNA: Ceres:12228.                                                   | 253196_at   | 0.8 |
| putative protein SPINDLY protein, Petunia x hybrida, Y17720                                                                                      | 253093_at   | 0.8 |
| cellulose synthase catalytic subunit (Ath-A) ; supported by cDNA: gi_2827140_gb_AF027173.1_AF027173                                              | 252886_at   | 0.8 |
| putative protein hypothetical protein, Schizosaccharomyces cerevisiae, Z99168                                                                    | 252867_at   | 0.8 |
| putative protein dehydrogenases of bacterial genome projects;supported by full-length cDNA: Ceres:114123.                                        | 252671_at   | 0.8 |
| putative protein Na+-dependent inorganic phosphate cotransporter, Rattus norvegicus, U07609FUNC 99                                               | 252444_at   | 0.8 |
| beta-D-glucan exohydrolase - like protein beta-D-glucan exohydrolase, Nicotiana tabacum, TREMBL:AB017502_1                                       | 252445_at   | 0.8 |
| putative progesterone-binding protein homolog Atpm2 ; supported by cDNA: gi_4960153_gb_AF153283.1_AF153283                                       | 252338_at   | 0.8 |
| putative protein transcribed gene of unknown function, Arabidopsis thaliana, EMBL:ATH132745                                                      | 252226_at   | 0.8 |
| putative protein UDP-glucose:(glucosyl) LPS alpha1,3-glucosyltransferase WaaO, E.coli, EMBL:AF019746                                             | 252179_at   | 0.8 |
| U1 snRNP 70K protein ; supported by cDNA: gi_14532499_gb_AY039874.1_                                                                             | 252182_at   | 0.8 |
| epoxide hydrolase-like protein epoxide hydrolase homolog - Glycine max, PIR:T07145; supported by cDNA: gi_13937212_gb_AF372961.1_AF3729          | 252095_at   | 0.8 |
| putative protein DMR-N9 PROTEIN, Mus musculus, SWISSPROT:DMR9_MOUSE                                                                              | 251967_at   | 0.8 |
| putative protein zinc finger protein GCS1 - Saccharomyces cerevisiae, PIR:S47006                                                                 | 251905_at   | 0.8 |
| transporter-like protein oligopeptide transporter (LeOPT1) - Lycopersicon esculentum, EMBL:AF016713                                              | 251916_at   | 0.8 |
| peptide transport - like protein peptide transport protein, Hordeum vulgare, PIR:T04378;supported by full-length cDNA: Ceres:117581.             | 251882_at   | 0.8 |
| protein disulfide-isomerase-like protein protein disulphide isomerase, Fasciola hepatica                                                         | 251840_at   | 0.8 |
| putative protein unnamed sequence, Homo sapiens, EMBL:AK001088; supported by cDNA: gi_15215685_gb_AY050371.1_                                    | 251828_at   | 0.8 |
| putative protein non-consensus TT donor splice site at exon 4; met-10+ protein - Neurospora crassa, PIR:JC4255; supported by cDNA: gi_1660463_   | 251712_at   | 0.8 |
| anthranilate phosphoribosyltransferase-like protein anthranilate phosphoribosyltransferase - Pisum sativum, PIR:T06460; supported by cDNA: gi_14 | 251563_at   | 0.8 |
| putative protein Bet1 homolog - Rattus norvegicus, EMBL:RN42755; supported by cDNA: gi_14030602_gb_AF368175.1_AF368175                           | 251579_at   | 0.8 |
| putative protein RanBP7/Importin 7 - Homo sapiens, EMBL:AF098799                                                                                 | 251495_at   | 0.8 |
| putative protein polyamine oxidase (EC 1.5.3.11) precursor - Zea mays plasmid pCR2.1;supported by full-length cDNA: Ceres:16421.                 | 251505_at   | 0.8 |
| multi resistance protein homolog multi resistance protein mrp - Arabidopsis thaliana, EMBL:ATMRPPROT                                             | 251457_s_at | 0.8 |
| URIDYLATE KINASE-like protein URIDYLATE KINASE - Arabidopsis thaliana, EMBL:AF000147;supported by full-length cDNA: Ceres:16800.                 | 251426_at   | 0.8 |
| putative protein RING finger protein AO7, Mus musculus, EMBL:AF171060                                                                            | 251403_at   | 0.8 |
| putative protein paladin - Mus musculus, EMBL:MMPAL                                                                                              | 251296_at   | 0.8 |
| beta-glucosidase-like protein several beta-glucosidases                                                                                          | 251230_at   | 0.8 |
| putative protein putative protein F15G16.70 - Arabidopsis thaliana, EMBL:AL132959; supported by cDNA: gi_15810023_gb_AY054280.1_                 | 251191_at   | 0.8 |
| putative protein putative transcription factor HUA2, Arabidopsis thaliana, EMBL:AF116556                                                         | 251203_at   | 0.8 |
| aldose reductase-like protein aldose reductase - Hordeum vulgare, EMBL:Z48360                                                                    | 251100_at   | 0.8 |
| putative protein unknown protein At2g37660 - Arabidopsis thaliana, EMBL:AC004684; supported by cDNA: gi_15294289_gb_AF410336.1_AF41033           | 251038_at   | 0.8 |
| putative protein various predicted proteins, Arabidopsis thaliana;supported by full-length cDNA: Ceres:13930.                                    | 251005_at   | 0.8 |
| putative protein                                                                                                                                 | 250941_at   | 0.8 |
| putative protein beta-(1-3)-glucosyl transferase, Bradyrhizobium japonicum, EMBL:AF047687; supported by cDNA: gi_16974551_gb_AY060563.1_         | 250892_at   | 0.8 |
| myotubularin - like protein myotubularin, Homo sapiens, EMBL:U46024                                                                              | 250833_at   | 0.8 |
| putative protein rmgB protein, Dictyostelium discoideum, PIR:S68824; supported by cDNA: gi_15724205_gb_AF412043.1_AF412043                       | 250851_at   | 0.8 |
| glycolate oxidase subunit D-like; D-lactate dehydrogenase-like ; supported by cDNA: gi_15010679_gb_AY045641.1_                                   | 250691_at   | 0.8 |
| putative protein mature parasite-infected erythrocyte surface antigen, Plasmodium falciparum, EMBL:AF056936                                      | 250603_at   | 0.8 |
| RNA helicase-like protein                                                                                                                        | 250529_at   | 0.8 |
| sulfate transporter ; supported by cDNA: gi_2114105_dbj_AB003591.1_AB003591                                                                      | 250475_at   | 0.8 |
| bromodomain protein - like bromodomain protein (BRDT), Homo sapiens, EMBL:AF019085                                                               | 250424_at   | 0.8 |
| RNA binding protein - like ma binding protein, Schizosaccharomyces pombe, PIR:T39586                                                             | 250436_at   | 0.8 |
| putative protein hypothetical bacterial proteins; supported by cDNA: gi_15724207_gb_AF412044.1_AF412044                                          | 250442_at   | 0.8 |
| transcription factor like protein transcription factor TINY, Arabidopsis thaliana, PIR:T01076                                                    | 250379_at   | 0.8 |
| putative protein rjs protein, Mus musculus, PIR:T14317;supported by full-length cDNA: Ceres:266544.                                              | 250382_at   | 0.8 |
| putative protein various predicted proteins, Drosophila melanogaster, Caenorhabditis elegans, Homo sapiens; supported by full-length cDNA: Cere  | 250384_at   | 0.8 |
| putative protein predicted protein, Arabidopsis thaliana                                                                                         | 250355_at   | 0.8 |
| clathrin binding protein - like Af10-protein, Avena fatua, EMBL:U80041                                                                           | 250356_at   | 0.8 |
| CCAAT box binding factor/ transcription factor Hap2a                                                                                             | 250320_at   | 0.8 |
| cobalamin biosynthesis protein                                                                                                                   | 250243_at   | 0.8 |
| putative protein similar to unknown protein (emb CAB86638.1)                                                                                     | 250202_at   | 0.8 |
| alpha-mannosidase                                                                                                                                | 250203_at   | 0.8 |
| putative protein similar to unknown protein (ref NP_057085.1);supported by full-length cDNA: Ceres:38057.                                        | 250222_at   | 0.8 |
| pescadillo - like protein embryonic development allele: hi2, Danio rerio, EMBL:U77627 pescadillo, Homo sapiens, EMBL:U78310                      | 250192_at   | 0.8 |
| putative protein similar to unknown protein (pir T09939);supported by full-length cDNA: Ceres:23754.                                             | 250013_at   | 0.8 |
| Ruv DNA-helicase-like protein ;supported by full-length cDNA: Ceres:113109.                                                                      | 249938_at   | 0.8 |
| putative protein similar to unknown protein (gb AAF31706.1); supported by cDNA: gi_13605898_gb_AF367348.1_AF367348                               | 249912_at   | 0.8 |
| putative protein similar to unknown protein (gb AAD20392.1)                                                                                      | 249825_at   | 0.8 |
| putative protein similar to unknown protein (gb AAF01580.1)                                                                                      | 249835_s_at | 0.8 |
| MtN3-like protein ; supported by cDNA: gi_3747110_gb_AF095641.1_AF095641                                                                         | 249800_at   | 0.8 |
| receptor-protein kinase-like protein                                                                                                             | 249763_at   | 0.8 |
| putative protein similar to unknown protein (pir T40675); supported by cDNA: gi_14335067_gb_AY037213.1_                                          | 249701_at   | 0.8 |
| putative protein strong similarity to unknown protein (gb AAD21756.1); supported by cDNA: gi_15146184_gb_AY049233.1_ although this cDNA may      | 249703_at   | 0.8 |
| protein kinase-like                                                                                                                              | 249678_at   | 0.8 |
| v-SNARE AtVT11a                                                                                                                                  | 249453_at   | 0.8 |
| ribosomal protein L5 - like ribosomal protein L5, rice                                                                                           | 249466_at   | 0.8 |
| putative protein hypothetical protein - Synechocystis sp., PIR:S76678                                                                            | 249433_at   | 0.8 |
| DegP protease contains similarity to DegP2 protease Gl:13172275 from [Arabidopsis thaliana]                                                      | 249396_at   | 0.8 |
| putative protein strong similarity to unknown protein (gb AAF19684.1)                                                                            | 249278_at   | 0.8 |
| putative protein contains similarity to glutathione-S-transferase/glutaredoxin;supported by full-length cDNA: Ceres:4645.                        | 249233_at   | 0.8 |
| 20S proteasome subunit PAF1 (gb AAC32062.1) ; supported by full-length cDNA: Ceres: 12455.                                                       | 249161_at   | 0.8 |
| putative protein similar to unknown protein (pir T02918); supported by full-length cDNA: Ceres: 26596.                                           | 249122_at   | 0.8 |
| putative protein similar to unknown protein (sp P42620);supported by full-length cDNA: Ceres:109127.                                             | 249075_at   | 0.8 |
| casein kinase II beta chain ; supported by cDNA: gi_468263_gb_L22563.1_ATHCKIB                                                                   | 248826_at   | 0.8 |
| VAMP (vesicle-associated membrane protein)-associated protein-like ;supported by full-length cDNA: Ceres:14236.                                  | 248796_at   | 0.8 |
| GTP-binding protein-like                                                                                                                         | 248809_at   | 0.8 |
| sodium-dicarboxylate cotransporter-like ;supported by full-length cDNA: Ceres:107593.                                                            | 248756_at   | 0.8 |
| unknown protein                                                                                                                                  | 248743_at   | 0.8 |
| putative protein contains similarity to jasmonate inducible protein;supported by full-length cDNA: Ceres:19110.                                  | 248713_at   | 0.8 |
| putative protein contains similarity to salt-inducible protein                                                                                   | 248669_at   | 0.8 |
| xylulose kinase ; supported by cDNA: gi_15292818_gb_AY050843.1_                                                                                  | 248591_at   | 0.8 |

|                                                                                                                                                            |             |     |
|------------------------------------------------------------------------------------------------------------------------------------------------------------|-------------|-----|
| nucleotide-binding protein ; supported by cDNA: gi_13430793_gb_AF360309.1_AF360309                                                                         | 248462_at   | 0.8 |
| putative protein similar to unknown protein (gb)AAF03497.1)                                                                                                | 248410_at   | 0.8 |
| unknown protein ; supported by cDNA: gi_15810027_gb_AY054282.1_                                                                                            | 248289_at   | 0.8 |
| putative protein similar to unknown protein (gb)AAD26950.1); supported by full-length cDNA: Ceres: 33791.                                                  | 248261_at   | 0.8 |
| pectinesterase ; supported by cDNA: gi_15293286_gb_AY051077.1_                                                                                             | 248263_at   | 0.8 |
| tyrosine aminotransferase                                                                                                                                  | 248207_at   | 0.8 |
| putative protein similar to unknown protein (pir T05472);supported by full-length cDNA: Ceres:30073.                                                       | 248148_at   | 0.8 |
| chaperone GrpE-like protein ;supported by full-length cDNA: Ceres:20790.                                                                                   | 248101_at   | 0.8 |
| putative protein similar to unknown protein (ref NP_004583.1); supported by cDNA: gi_14532719_gb_AY039984.1_                                               | 248106_at   | 0.8 |
| putative protein similar to unknown protein (ref NP_032765.1)                                                                                              | 248081_at   | 0.8 |
| ABC transporter-like protein ; supported by cDNA: gi_9964120_gb_AF287699.1_AF287699                                                                        | 247806_at   | 0.8 |
| putative protein predicted proteins, Arabidopsis thaliana and Oryza sativa                                                                                 | 247741_at   | 0.8 |
| GTP cyclohydrolase II / 3,4-dihydroxy-2-butanone-4-phosphate synthase - like protein GTP cyclohydrolase II / 3,4-dihydroxy-2-butanone-4-phosphate          | 247694_at   | 0.8 |
| putative protein predicted protein, Arabidopsis thaliana                                                                                                   | 247556_at   | 0.8 |
| H-protein promoter binding factor-like protein                                                                                                             | 247452_at   | 0.8 |
| glutaredoxin-like protein ; supported by full-length cDNA: Ceres: 96557.                                                                                   | 247418_at   | 0.8 |
| unknown protein ;supported by full-length cDNA: Ceres:114951.                                                                                              | 247372_at   | 0.8 |
| cdc2-like protein kinase-like protein supported by full-length cDNA: Ceres: 22817.                                                                         | 247334_at   | 0.8 |
| putative protein contains similarity to RNA-binding protein                                                                                                | 247276_at   | 0.8 |
| histone acetyltransferase                                                                                                                                  | 247238_at   | 0.8 |
| putative protein contains similarity to unknown protein (gb)AAF47170.1);supported by full-length cDNA: Ceres:13188.                                        | 247209_at   | 0.8 |
| putative membrane protein hypothetical protein F19K16.31 - Arabidopsis thaliana, EMBL:AC011717                                                             | 246945_s_at | 0.8 |
| putative protein predicted protein, Oryza sativa                                                                                                           | 246909_at   | 0.8 |
| putative protein phytochrome-associated protein 1, Arabidopsis thaliana, EMBL:AF088281;supported by full-length cDNA: Ceres:2499.                          | 246861_at   | 0.8 |
| putative amino acid aminotransferase branched-chain amino acid aminotransferase - Pseudomonas aeruginosa, SWISSPROT:ILVE_PSEAE; supp                       | 246786_at   | 0.8 |
| 5-enolpyruvylshikimate-3-phosphate (EPSP) synthase, putative similar to 5-enolpyruvylshikimate-3-phosphate (EPSP) synthase GI:2583124 from (P              | 246627_s_at | 0.8 |
| E2F transcription factor -like protein E2F protein, Triticum sp., EMBL:TSP238590                                                                           | 246568_at   | 0.8 |
| ubiquitin-fusion degradation protein-like ubiquitin-fusion degradation protein - Homo sapiens, EMBL:AF043117; supported by cDNA: gi_15215855_g             | 246541_at   | 0.8 |
| Inositol 1,3,4-Trisphosphate 5/6 kinase ;supported by full-length cDNA: Ceres:30653.                                                                       | 246451_at   | 0.8 |
| syntaxin homologue ;supported by full-length cDNA: Ceres:8257.                                                                                             | 246453_at   | 0.8 |
| WD40-repeat protein transducin homolog sazD - Homo sapiens, EMBL:U02609; supported by cDNA: gi_15810484_gb_AY056281.1_                                     | 246457_at   | 0.8 |
| quinone oxidoreductase -like protein probable quinone oxidoreductase (EC 1.6.5.5) P1, Arabidopsis thaliana, PIR:S57611                                     | 246463_at   | 0.8 |
| sugar transporter - like protein D-XYLOSE-PROTON SYMPORTER (D-XYLOSE TRANSPORTER), Lactobacillus brevis, SWISSPROT:XYLT_LACE                               | 246466_at   | 0.8 |
| sulfate transporter ATST1 ; supported by cDNA: gi_2285884_dbj_D89631.1_D89631                                                                              | 246310_at   | 0.8 |
| G-protein, putative contains Pfam profile: PF00503: G-protein alpha subunit                                                                                | 246312_at   | 0.8 |
| unknown protein                                                                                                                                            | 246287_at   | 0.8 |
| unknown protein                                                                                                                                            | 246288_at   | 0.8 |
| amino acid permease, putative contains Pfam profile: PF00324: Amino acid permease                                                                          | 246260_at   | 0.8 |
| hypothetical protein                                                                                                                                       | 246262_at   | 0.8 |
| putative protein                                                                                                                                           | 246234_at   | 0.8 |
| putative protein predicted protein, Oryza sativa; supported by cDNA: gi_15081722_gb_AY048254.1_                                                            | 246160_at   | 0.8 |
| putative protein BEM46 bem1/bud5 suppressor, Schizosaccharomyces pombe, bem1/bud5 suppressor, EMBL:SP29892;supported by full-length cD                     | 246090_at   | 0.8 |
| rev interacting protein mis3 - like rev interacting protein mis3, Schizosaccharomyces pombe, PIR:T39981;supported by full-length cDNA: Ceres:303           | 246060_at   | 0.8 |
| vegetative storage protein Vsp1 ; supported by full-length cDNA: Ceres:32606.                                                                              | 245928_s_at | 0.8 |
| alcohol dehydrogenase - like protein alcohol dehydrogenase 6, Vitis vinifera, EMBL:AF195866;supported by full-length cDNA: Ceres:155666.                   | 245929_at   | 0.8 |
| adenosine nucleotide translocator ; supported by cDNA: gi_15292846_gb_AY050857.1_                                                                          | 245854_at   | 0.8 |
| protein kinase, putative similar to protein kinase GI:717180 from (Arabidopsis thaliana)                                                                   | 245825_at   | 0.8 |
| unknown protein contains similarity to obtusifoliol 14-alpha-demethylase (CYP51) GB:Y09292 GI:1707854 from [Triticum aestivum];supported by full-          | 245795_at   | 0.8 |
| unknown protein ;supported by full-length cDNA: Ceres:8255.                                                                                                | 245780_at   | 0.8 |
| unknown protein ;supported by full-length cDNA: Ceres:39155.                                                                                               | 245730_at   | 0.8 |
| purine permease identical to purine permease GI:7620007 from [Arabidopsis thaliana]; supported by cDNA: gi_7620006_gb_AF078531.1_AF078531                  | 245671_at   | 0.8 |
| unknown protein similar to putative Tub family protein GI:3738302 from [Arabidopsis thaliana]                                                              | 245633_at   | 0.8 |
| hypothetical protein                                                                                                                                       | 245601_at   | 0.8 |
| hypothetical protein                                                                                                                                       | 245618_at   | 0.8 |
| LET1 like protein                                                                                                                                          | 245496_at   | 0.8 |
| hypothetical protein                                                                                                                                       | 245439_at   | 0.8 |
| putative protein                                                                                                                                           | 245418_at   | 0.8 |
| ATP-dependent Clp protease proteolytic subunit (ClpR4), putative similar to ATP-dependent Clp protease proteolytic subunit GI:7264063 from [Syn            | 245400_at   | 0.8 |
| Expressed protein ; supported by full-length cDNA: Ceres: 16319.                                                                                           | 245373_s_at | 0.8 |
| lactate dehydrogenase (LDH1) ;supported by full-length cDNA: Ceres:33509.                                                                                  | 245324_at   | 0.8 |
| farnesyl-pyrophosphate synthetase FPS2 ; supported by cDNA: gi_1146162_gb_L46349.1_ATHFPS2R                                                                | 245301_at   | 0.8 |
| transcription factor like protein ; supported by cDNA: gi_16226918_gb_AF428368.1_AF428368                                                                  | 245271_at   | 0.8 |
| viral resistance protein, putative similar to viral resistance protein GI:7110565 from [Arabidopsis thaliana]                                              | 245219_at   | 0.8 |
| ethylene response sensor (ERS) identical to GB:U21952:ATU21952; supported by cDNA: gi_15450903_gb_AY054532.1_                                              | 245098_at   | 0.8 |
| putative cytochrome P450 ; supported by cDNA: gi_15810181_gb_AY056105.1_                                                                                   | 245101_at   | 0.8 |
| putative cytochrome P450                                                                                                                                   | 245075_at   | 0.8 |
| ribosomal protein L16                                                                                                                                      | 244983_at   | 0.8 |
| ribosomal protein S12 (trans-splice part 2 of 2)                                                                                                           | 244940_at   | 0.8 |
| hypothetical protein similar to polyketide hydroxylases from several bacterial species                                                                     | 257410_at   | 0.8 |
| hypothetical protein Similar to gi 1573829 HI0816 aminopeptidase P homolog (pepP) from Haemophilus influenzae genome gb U32764                             | 263707_at   | 0.7 |
| Expressed protein ; supported by full-length cDNA: Ceres: 36399.                                                                                           | 262782_at   | 0.7 |
| unknown protein ; supported by cDNA: gi_16930706_gb_AF436837.1_AF436837                                                                                    | 261130_at   | 0.7 |
| Expressed protein ; supported by cDNA: gi_15810240_gb_AY056159.1_                                                                                          | 257010_at   | 0.7 |
| putative protein retinoblastoma binding protein 2, Homo sapiens, PIR:I78879                                                                                | 254464_at   | 0.7 |
| putative protein protein phosphatase 2C, Medicago sativa, PID:g2582800                                                                                     | 253512_at   | 0.7 |
| putative protein ThiJ protein, Escherichia coli, PIR:H64771                                                                                                | 253320_at   | 0.7 |
| putative protein predicted proteins, Arabidopsis thaliana                                                                                                  | 251809_at   | 0.7 |
| putative protein predicted proteins, Homo sapiens, Drosophila melanogaster and Caenorhabditis elegans.                                                     | 250156_at   | 0.7 |
| putative protein contains similarity to DNA-damage-inducible protein P                                                                                     | 249016_at   | 0.7 |
| oligopeptide transporter -like protein oligopeptide transporter (LeOPT1), Lycopersicon esculentum, EMBL:AF016713                                           | 246566_at   | 0.7 |
| ubiquitin-specific protease 8 (UBP8), putative similar to ubiquitin-specific protease 8 partial sequence GI:11993469 [Arabidopsis thaliana]                | 245683_at   | 0.7 |
| Arabidopsis thaliana /REF=U37281 /DEF=actin-2 mRNA, complete cds /LEN=1637 (-5, -M, -3 represent transcript regions 5 prime, Middle, and 3 pr-r2-AtActin-3 | 267609_at   | 0.7 |
| unknown protein similar to GP 522127 gnl PID e349073 Z35639 and GP 2224677 gnl PID d1021664 AB002366                                                       | 267519_at   | 0.7 |
| putative VP1/ABI3 family regulatory protein                                                                                                                | 267496_at   | 0.7 |
| putative lipase ; supported by full-length cDNA: Ceres: 207043.                                                                                            | 267497_at   | 0.7 |
| putative glutaredoxin ;supported by full-length cDNA: Ceres:39560.                                                                                         | 267422_at   | 0.7 |
| putative protein kinase contains a protein kinase domain profile (PDOC00100)                                                                               | 267422_at   | 0.7 |

|                                                                                                                                                         |             |     |
|---------------------------------------------------------------------------------------------------------------------------------------------------------|-------------|-----|
| G protein alpha subunit 1 (GPA1) identical to GB:M32887; supported by cDNA: gi_14326501_gb_AF385704.1_AF385704                                          | 267375_at   | 0.7 |
| hypothetical protein                                                                                                                                    | 267378_at   | 0.7 |
| putative isoamylase                                                                                                                                     | 267356_at   | 0.7 |
| unknown protein ; supported by cDNA: gi_14194142_gb_AF367277.1_AF367277                                                                                 | 267214_at   | 0.7 |
| putative beta-alanine-pyruvate aminotransferase ; supported by full-length cDNA: Ceres:147543.                                                          | 267035_at   | 0.7 |
| hypothetical protein predicted by genefinder                                                                                                            | 266938_at   | 0.7 |
| putative small GTP-binding protein contains an ATP/GTP-binding site motif A (P-loop); contains an ADP-ribosylation factors family signature for prote   | 266885_at   | 0.7 |
| putative nucleotide-binding protein ; supported by full-length cDNA: Ceres:33511.                                                                       | 266801_at   | 0.7 |
| unknown protein predicted by genefinder and genscan; supported by cDNA: gi_16612270_gb_AF439832.1_AF439832                                              | 266738_at   | 0.7 |
| hypothetical protein predicted by genefinder; supported by cDNA: gi_10280999_dbj_AB046953.1_AB046953                                                    | 266720_s_at | 0.7 |
| unknown protein                                                                                                                                         | 266721_at   | 0.7 |
| putative Na <sup>+</sup> -dependent inorganic phosphate cotransporter                                                                                   | 266672_at   | 0.7 |
| cyclic nucleotide and calmodulin-regulated ion channel ; supported by cDNA: gi_14532659_gb_AY039954.1_                                                  | 266520_at   | 0.7 |
| unknown protein ; supported by cDNA: gi_16024935_gb_AY050658.1_                                                                                         | 266501_at   | 0.7 |
| hypothetical protein The first 3 exons is identical to that of GB:AJ224957. This gene appears to be a truncated version of that in GB:AJ224957.; supp   | 266466_at   | 0.7 |
| putative protein transport protein SEC12p identical to GB:M95796, contains a WD-40 repeat domain; supported by cDNA: gi_166877_gb_M95796.1              | 266350_at   | 0.7 |
| glutathione S-transferase identical to GB:X89216; supported by full-length cDNA: Ceres:6528.                                                            | 266299_at   | 0.7 |
| unknown protein                                                                                                                                         | 266075_s_at | 0.7 |
| putative glutamate/ornithine acetyltransferase ; supported by full-length cDNA: Ceres:121873.                                                           | 265965_at   | 0.7 |
| recA, putative similar to GB:CAA39098 GI:48781 recA from [Legionella pneumophila]                                                                       | 265941_s_at | 0.7 |
| unknown protein ; supported by full-length cDNA: Ceres:104853.                                                                                          | 265867_at   | 0.7 |
| unknown protein ; supported by cDNA: gi_15810154_gb_AY056142.1_                                                                                         | 265875_at   | 0.7 |
| proline iminopeptidase identical to GP:1710151:U72711; supported by cDNA: gi_15450388_gb_AY052295.1_                                                    | 265575_at   | 0.7 |
| unknown protein                                                                                                                                         | 265576_at   | 0.7 |
| unknown protein                                                                                                                                         | 265583_at   | 0.7 |
| unknown protein predicted by genscan                                                                                                                    | 265495_at   | 0.7 |
| Expressed protein ; supported by cDNA: gi_14335135_gb_AY037247.1_                                                                                       | 265474_at   | 0.7 |
| putative AAA-type ATPase similar to 26S proteasome regulatory subunit 8; supported by cDNA: gi_15450827_gb_AY054494.1_                                  | 265340_at   | 0.7 |
| unknown protein predicted by genefinder                                                                                                                 | 265283_at   | 0.7 |
| putative ribose phosphate pyrophosphokinase ; supported by full-length cDNA: Ceres:35051.                                                               | 265270_at   | 0.7 |
| beta-fructosidase nearly identical to beta-fructosidase GB:CAA67560 GI:1429209 (Arabidopsis thaliana); supported by cDNA: gi_14517549_gb_AY0            | 265118_at   | 0.7 |
| putative b-keto acyl reductase similar to GB:AAB82765, protein is involved with cuticular wax biosynthesis                                              | 265012_at   | 0.7 |
| hypothetical protein predicted by genemark.hmm                                                                                                          | 264936_at   | 0.7 |
| unknown protein ; supported by full-length cDNA: Ceres:99231.                                                                                           | 264848_at   | 0.7 |
| unknown protein similar to F5J6.8 and C. elegans C42D8.3; supported by full-length cDNA: Ceres:2578.                                                    | 264850_at   | 0.7 |
| putative indole-3-acetate beta-glucosyltransferase similar to GB:AAB64022; supported by cDNA: gi_14423541_gb_AF387008.1_AF387008                        | 264873_at   | 0.7 |
| unknown protein                                                                                                                                         | 264696_at   | 0.7 |
| unknown protein                                                                                                                                         | 264707_at   | 0.7 |
| hypothetical protein similar to hypothetical protein GI:7019676 from [Arabidopsis thaliana]                                                             | 264629_at   | 0.7 |
| hypothetical protein similar to ankyrin like protein GI:7268141 from [Arabidopsis thaliana]; supported by cDNA: gi_14194106_gb_AF367259.1_AF367         | 264484_at   | 0.7 |
| unknown protein EST gb N65787 comes from this gene                                                                                                      | 264437_at   | 0.7 |
| putative sensory transduction histidine kinase similar to GB:AAD21777; similar to ESTs gb AA712891 and gb AA042438; supported by cDNA: gi_13            | 264448_at   | 0.7 |
| putative myb-related transcription factor Similar to myb-related transcription factor (THM27) gb X95296 from Solanum lycopersicum. ESTs gb T420         | 264210_at   | 0.7 |
| unknown protein                                                                                                                                         | 264154_at   | 0.7 |
| hypothetical protein predicted by genemark.hmm                                                                                                          | 264133_at   | 0.7 |
| latex-abundant protein, putative similar to latex-abundant protein GI:4235430 from [Hevea brasiliensis]                                                 | 264120_at   | 0.7 |
| hypothetical protein predicted by genemark.hmm; supported by cDNA: gi_15081627_gb_AY048206.1_                                                           | 264098_at   | 0.7 |
| unknown protein                                                                                                                                         | 264031_at   | 0.7 |
| putative peroxidase ; supported by full-length cDNA: Ceres:113695.                                                                                      | 264001_at   | 0.7 |
| hypothetical protein predicted by genefinder                                                                                                            | 263939_at   | 0.7 |
| unknown protein                                                                                                                                         | 263878_s_at | 0.7 |
| putative glucan synthase                                                                                                                                | 263891_at   | 0.7 |
| unknown protein ; supported by cDNA: gi_15450510_gb_AY052357.1_                                                                                         | 263787_at   | 0.7 |
| putative ubiquitin activating enzyme                                                                                                                    | 263747_at   | 0.7 |
| 26S proteasome regulatory subunit S2 contains an APC-complex (cyclosome) and proteasome component repeat ( PS50248); supported by cDNA: (               | 263716_at   | 0.7 |
| putative ethylene receptor (ERS2) EST gb W43451 comes from this gene                                                                                    | 263653_at   | 0.7 |
| unknown protein                                                                                                                                         | 263654_at   | 0.7 |
| hypothetical protein predicted by genscan                                                                                                               | 263526_at   | 0.7 |
| putative ribonuclease E                                                                                                                                 | 263322_at   | 0.7 |
| putative glyoxalase II                                                                                                                                  | 263243_at   | 0.7 |
| Expressed protein ; supported by cDNA: gi_15293050_gb_AY050959.1_                                                                                       | 263210_at   | 0.7 |
| unknown protein similar to hypothetical protein GB:AAF27089 GI:6730668 from (Arabidopsis thaliana)                                                      | 263014_at   | 0.7 |
| unknown protein                                                                                                                                         | 262969_at   | 0.7 |
| transcription initiation factor, putative similar to transcription initiation factor iif, beta subunit GB:CAA22523 GI:4049502 from [Schizosaccharomyces | 262950_at   | 0.7 |
| gamma-tocopherol methyltransferase almost identical to gamma-tocopherol methyltransferase GI:4106538 from [Arabidopsis thaliana]; supported by          | 262875_at   | 0.7 |
| ammonium transporter, putative similar to ammonium transporter GI:5880357 from [Arabidopsis thaliana]; supported by cDNA: gi_4324713_gb_AF              | 262883_at   | 0.7 |
| putative cytochrome P450 monooxygenase identical to gb D78605 cytochrome P450 monooxygenase from Arabidopsis thaliana and is a member of                | 262826_at   | 0.7 |
| unknown protein                                                                                                                                         | 262775_at   | 0.7 |
| putative clathrin-coat assembly protein similar to gb L26291 clathrin-associated protein unc-101 from Caenorhabditis elegans and is a member of the     | 262787_at   | 0.7 |
| unknown protein ESTs gb F15498, gb H37515, gb T41906, gb T22448, gb W43356 and gb T20739 come from this gene; supported by full-length cD               | 262709_at   | 0.7 |
| vacuolar sorting protein 35, putative similar to vacuolar sorting protein 35 GB:AAF02778 GI:6049847 [Homo sapiens]                                      | 262695_at   | 0.7 |
| integral membrane protein, putative contains Pfam profile: PF00892 Integral membrane protein DUF6                                                       | 262623_at   | 0.7 |
| unknown protein ESTs gb F20110 and gb F20109 come from this gene                                                                                        | 262577_at   | 0.7 |
| tuftelin-interacting-like protein Similar to tuftelin-interacting proteins [Mus musculus] (gj 3851164 and gj 5059423)                                   | 262524_at   | 0.7 |
| threonine synthase, putative similar to threonine synthase GI:4850369 from [Arabidopsis thaliana]                                                       | 262380_at   | 0.7 |
| Niemann-Pick C disease protein-like protein similar to Niemann-Pick C disease protein GB:AAB63982 GI:2276463 from [Homo sapiens]                        | 262264_at   | 0.7 |
| unknown protein ; supported by cDNA: gi_13605689_gb_AF361826.1_AF361826                                                                                 | 262272_at   | 0.7 |
| hypothetical protein predicted by genemark.hmm                                                                                                          | 262237_at   | 0.7 |
| AP2 domain containing protein, putative similar to AP2 domain containing protein GI:2281649 from [Arabidopsis thaliana]; supported by full-length cD    | 262197_at   | 0.7 |
| unknown protein ; supported by full-length cDNA: Ceres:3024.                                                                                            | 262171_at   | 0.7 |
| cytochrome c oxidase subunit, putative similar to cytochrome c oxidase subunit GI:267 from [Bos taurus]; supported by full-length cDNA: Ceres:2536      | 261939_at   | 0.7 |
| unknown protein                                                                                                                                         | 261880_at   | 0.7 |
| BTG1 binding factor 1, putative similar to BTG1 binding factor 1 GI:6016012 from [Homo sapiens]                                                         | 261841_at   | 0.7 |
| metal ion transporter, putative similar to metal ion transporter GI:5853313 from [Arabidopsis thaliana]                                                 | 261845_at   | 0.7 |
| hypothetical protein contains similarity to amino acid permease GI:7415521 from [Oryza sativa]                                                          | 261785_at   | 0.7 |
| hypothetical protein similar to hypothetical protein GB:AAF25977 GI:6714281 from [Arabidopsis thaliana]                                                 | 261701_at   | 0.7 |
| unknown protein similar to hypothetical protein GB:AAF26001 GI:6714305 from [Arabidopsis thaliana]; supported by full-length cDNA: Ceres:94234.         | 261669_at   | 0.7 |

|                                                                                                                                                     |             |     |
|-----------------------------------------------------------------------------------------------------------------------------------------------------|-------------|-----|
| unknown protein similar to putative esterase GB:AAD17422 GI:4335745 from [Arabidopsis thaliana]                                                     | 261607_at   | 0.7 |
| unknown protein ;supported by full-length cDNA: Ceres:8976.                                                                                         | 261566_at   | 0.7 |
| protein kinase, putative contains Pfam profile: PF00069 Eukaryotic protein kinase domain                                                            | 261547_at   | 0.7 |
| unknown protein                                                                                                                                     | 261467_at   | 0.7 |
| unknown protein                                                                                                                                     | 261469_at   | 0.7 |
| protein kinase, putative (fragment) similar to GB:BAA94509 from [Populus nigra]                                                                     | 261436_at   | 0.7 |
| unknown protein ;supported by full-length cDNA: Ceres:920.                                                                                          | 261377_at   | 0.7 |
| hypothetical protein predicted by genemark.hmm                                                                                                      | 261323_at   | 0.7 |
| hypothetical protein predicted by genemark.hmm                                                                                                      | 261301_at   | 0.7 |
| putative NPK1-related protein kinase 2 predicted by genemark.hmm                                                                                    | 261312_at   | 0.7 |
| unknown protein ;supported by full-length cDNA: Ceres:3807.                                                                                         | 261154_at   | 0.7 |
| hypothetical protein contains similarity to transcription factor TFIID GB:U57693 GI:1373376 from (Homo sapiens); supported by cDNA: gi_15810158     | 261041_at   | 0.7 |
| molybdopterin biosynthesis CNX3 protein, putative similar to molybdopterin biosynthesis CNX3 protein GB:Q39056 from [Arabidopsis thaliana]          | 261044_at   | 0.7 |
| hypothetical protein contains similarity to RNA helicase (HRH1) GB:D50487 GI:1742909 from [Homo sapiens]                                            | 261008_at   | 0.7 |
| MAP kinase ATPMK9, putative similar to GI:7106544 from (Arabidopsis thaliana)                                                                       | 260979_at   | 0.7 |
| F-box protein family contains similarity to F-box protein FBX3 GI:6103643 from [Homo sapiens]                                                       | 260949_at   | 0.7 |
| ATP-dependent Clp protease proteolytic subunit (ClpP5) identical to nClpP1 GB:BAA82065 GI:5360579 from [Arabidopsis thaliana];supported by full     | 260912_at   | 0.7 |
| 19S proteasome subunit 9, putative similar to 19S proteasome subunit 9 GB:AAC34120 GI:3450889 from [Arabidopsis thaliana];supported by full-len     | 260842_at   | 0.7 |
| unknown protein                                                                                                                                     | 260817_at   | 0.7 |
| hypothetical protein predicted by genscan+                                                                                                          | 260455_at   | 0.7 |
| unknown protein                                                                                                                                     | 260373_at   | 0.7 |
| hypothetical protein predicted by genscan+; supported by cDNA: gi_15293216_gb_AY051042.1_                                                           | 260311_at   | 0.7 |
| putative U3 small nuclear ribonucleoprotein protein identical to putative U3 small nuclear ribonucleoprotein protein GB:AAF07373 (Arabidopsis th    | 260323_at   | 0.7 |
| putative monodehydroascorbate reductase similar to monodehydroascorbate reductase GB:AAD28178 [Brassica juncea]; supported by cDNA: gi_14           | 260325_at   | 0.7 |
| putative sulfate transporter contains Pfam profile: PF00916 sulfate transporter family;supported by full-length cDNA: Ceres:120095.                 | 260302_at   | 0.7 |
| unknown protein                                                                                                                                     | 259993_at   | 0.7 |
| hydroxypyruvate reductase (HPR) identical to hydroxypyruvate reductase (HPR) GB:D85339 [Arabidopsis thaliana] (Plant Cell Physiol 1997 Apr;38(4     | 260014_at   | 0.7 |
| unknown protein                                                                                                                                     | 259874_at   | 0.7 |
| 12-oxophytodienoate reductase (OPR2) identical to 12-oxophytodienoate reductase OPR2 GB:AAC78441 [Arabidopsis thaliana]                             | 259875_s_at | 0.7 |
| unknown protein similar to hypothetical protein GB:CAB39648 [Arabidopsis thaliana]; supported by cDNA: gi_14532697_gb_AY039973.1_                   | 259882_at   | 0.7 |
| unknown protein                                                                                                                                     | 259794_at   | 0.7 |
| unknown protein ;supported by full-length cDNA: Ceres:10323.                                                                                        | 259766_at   | 0.7 |
| acyl-CoA synthetase, putative similar to GI:1903032 from [Brassica napus] (Plant Mol. Biol. 33 (5), 911-922 (1997)); supported by cDNA: gi_145326   | 259737_at   | 0.7 |
| Expressed protein ; supported by full-length cDNA: Ceres:20443.                                                                                     | 259542_at   | 0.7 |
| hypothetical protein                                                                                                                                | 259519_at   | 0.7 |
| unknown protein ; supported by cDNA: gi_14423507_gb_AF386991.1_AF386991                                                                             | 259500_at   | 0.7 |
| hypothetical protein contains similarity to ribosomal protein S15; supported by cDNA: gi_13605576_gb_AF361614.1_AF361614                            | 259505_at   | 0.7 |
| type 2A protein serine/threonine phosphatase 55 kDa B regulatory subunit almost identical to type 2A protein serine/threonine phosphatase 55 kDa E  | 259404_at   | 0.7 |
| jasmomate inducible protein isolog ;supported by full-length cDNA: Ceres:119153.                                                                    | 259382_s_at | 0.7 |
| unknown protein similar to unknown protein GB:AAC14509 [Arabidopsis thaliana]                                                                       | 259241_at   | 0.7 |
| unknown protein contains Pfam profile:PF00887 Acyl CoA binding protein                                                                              | 259159_at   | 0.7 |
| thioglycosidase 3D precursor identical to thioglycosidase 3D precursor GB:S57621 [Arabidopsis thaliana]; supported by cDNA: gi_14423459_gb_AF       | 259009_at   | 0.7 |
| hypothetical protein predicted by genefinder;supported by full-length cDNA: Ceres:40090.                                                            | 258856_at   | 0.7 |
| putative helicase similar to C-terminal half of transcription-repair coupling factor (TRCF) GB:Q55750 [Synechocystis PCC6803]; contains Pfam profil | 258861_at   | 0.7 |
| putative MYB-related protein similar to MYB-related protein GB:CAA73305                                                                             | 258723_at   | 0.7 |
| putative GTPase activating protein contains Pfam profile: PF01412 Putative GTP-ase activating protein for Arf                                       | 258689_at   | 0.7 |
| putative phosphatidylinositol-4-phosphate 5-kinase similar to phosphatidylinositol-4-phosphate 5-kinase GB:CAB53377 [Arabidopsis thaliana]          | 258651_at   | 0.7 |
| putative DEAD/DEAH box helicase contains Pfam profile: PF00270 DEAD/DEAH box helicase; supported by cDNA: gi_15081734_gb_AY048260.1_                | 258554_at   | 0.7 |
| hypothetical protein predicted by genscan                                                                                                           | 258474_at   | 0.7 |
| phospholipase D, putative similar to phospholipase D GB:BAA32278 from [Candida albicans]                                                            | 258430_at   | 0.7 |
| PP1/PP2A phosphatases pleiotropic regulator PRL2 identical to GB:Q39190 from [Arabidopsis thaliana]; supported by cDNA: gi_15809827_gb_AY0:         | 258380_at   | 0.7 |
| putative DNA binding protein identical to putative DNA binding protein GB:AAF27433 from [Arabidopsis thaliana]; supported by cDNA: gi_15028138      | 258324_at   | 0.7 |
| putative long-chain acyl-CoA synthetase similar to malonyl CoA synthetase GB:AAF28840 from [Bradyrhizobium japonicum];supported by full-length      | 258312_at   | 0.7 |
| acid phosphatase type 5 identical to GB:CAB63938 from [Arabidopsis thaliana];supported by full-length cDNA: Ceres:113666.                           | 258158_at   | 0.7 |
| hypothetical protein predicted by genmark;supported by full-length cDNA: Ceres:19279.                                                               | 258091_at   | 0.7 |
| unknown protein                                                                                                                                     | 258071_s_at | 0.7 |
| cysteine proteinase non-consensus AT acceptor site at exon 3; contains similarity to cysteine protease CYP1 GI:2828252, TDI-65 GI:5726641 from      | 258006_at   | 0.7 |
| fertilization-independent endosperm protein identical to GB:AAD23584 from [Arabidopsis thaliana]; supported by cDNA: gi_4567094_gb_AF129516.        | 257987_at   | 0.7 |
| unknown protein                                                                                                                                     | 257956_at   | 0.7 |
| unknown protein                                                                                                                                     | 257903_at   | 0.7 |
| transcriptional regulator protein, putative similar to ATAN11 GB:AAC18912 [Arabidopsis thaliana] (Genes Dev. 11 (11), 1422-1434 (1997)); contains   | 257833_at   | 0.7 |
| unknown protein                                                                                                                                     | 257783_at   | 0.7 |
| unknown protein contains Pfam profile: PF00515 tetratricopeptide repeat domain (TPR domain);supported by full-length cDNA: Ceres:23733.             | 257730_at   | 0.7 |
| unknown protein contains Pfam profile:PF00806 Pumilio-family RNA binding domains; supported by cDNA: gi_15010673_gb_AY045638.1_                     | 257652_at   | 0.7 |
| chaperonin, putative similar to CHAPERONIN CPN60-2, MITOCHONDRIAL PRECURSOR GB:Q05046 from [Cucurbita maxima];supported by full-lk                  | 257608_at   | 0.7 |
| unknown protein                                                                                                                                     | 257285_at   | 0.7 |
| transfactor, putative similar to GB:BAA75684 from [Nicotiana tabacum];supported by full-length cDNA: Ceres:6626.                                    | 257250_at   | 0.7 |
| zinc finger protein, putative contains Pfam profile: PF01760 CONSTANTS family zinc finger;supported by full-length cDNA: Ceres:258241.              | 257262_at   | 0.7 |
| 4-methyl-5(b-hydroxyethyl)-thiazole monophosphate biosynthesis protein, putative similar to ThiJ GB:AAA82704 [Escherichia coli]; likely encodes tw  | 257216_at   | 0.7 |
| Expressed protein ; supported by full-length cDNA: Ceres: 6801.                                                                                     | 257169_at   | 0.7 |
| unknown protein ; supported by cDNA: gi_15215846_gb_AY050453.1_                                                                                     | 257095_at   | 0.7 |
| squamosa promoter binding protein-like 5 identical to GB:CAB56571 from [Arabidopsis thaliana]                                                       | 257051_at   | 0.7 |
| zinc finger protein, putative contains Pfam profiles: PF00097 Zinc finger, C3HC4 type (RING finger) (2 copies)                                      | 257062_at   | 0.7 |
| adenosine triphosphatase, putative similar to vacuolar adenosine triphosphatase subunit D GB:AAC83085 from [Mus musculus]                           | 256988_s_at | 0.7 |
| unknown protein                                                                                                                                     | 256915_at   | 0.7 |
| cytochrome P450, putative contains Pfam profile: PF00067 cytochrome P450                                                                            | 256870_at   | 0.7 |
| unknown protein similar to CW14 GB:BAA87958 from [Arabidopsis thaliana]; supported by cDNA: gi_15450961_gb_AY054561.1_                              | 256747_at   | 0.7 |
| unknown protein ;supported by full-length cDNA: Ceres:38478.                                                                                        | 256663_at   | 0.7 |
| hypothetical protein predicted by genemark.hmm                                                                                                      | 256573_at   | 0.7 |
| ABC transporter, putative contains Pfam profile: PF00005: ABC transporter                                                                           | 256308_s_at | 0.7 |
| arginine N-methyltransferase 3, putative similar to arginine N-methyltransferase 3 GB:AAC40158 [Rattus norvegicus]                                  | 256288_at   | 0.7 |
| sulphate transporter, putative similar to high affinity sulphate transporter GB:X96431 GI:1217966 [Hordeum vulgare]; supported by cDNA: gi_11933:   | 256244_at   | 0.7 |
| beta-fructofuranosidase identical to beta-fructofuranosidase GI:6683112 from [Arabidopsis thaliana]; supported by cDNA: gi_6683111_dbj_AB02931:     | 256150_at   | 0.7 |
| unknown protein ;supported by full-length cDNA: Ceres:38751.                                                                                        | 256017_at   | 0.7 |
| inositol polyphosphate 5-phosphatase II, putative similar to inositol polyphosphate 5-phosphatase II GI:9945302 from [Mus musculus]; supported by   | 255984_at   | 0.7 |
| glycyl tRNA synthetase, putative similar to glycyl tRNA synthetase GI:577711 from [Homo sapiens];supported by full-length cDNA: Ceres:29666.        | 256000_at   | 0.7 |
| putative protein kinase contains a protein kinase domain profile (PDOC00100); supported by cDNA: gi_13448034_gb_AF339146.1_AF339146                 | 255872_at   | 0.7 |



|                                                                                                                                                    |           |     |
|----------------------------------------------------------------------------------------------------------------------------------------------------|-----------|-----|
| putative cinnamoyl-CoA reductase highly similar to F4P9.36                                                                                         | 255845_at | 0.7 |
| AT-hook DNA-binding protein (AHP1) almost identical to GB:CAA10857; supported by cDNA: gi_14326503_gb_AF385705.1_AF385705                          | 255792_at | 0.7 |
| unknown protein ;supported by full-length cDNA: Ceres:121070.                                                                                      | 255766_at | 0.7 |
| putative beta-amylase similar to the family of glycosyl hydrolases                                                                                 | 255676_at | 0.7 |
| predicted protein with unknown function                                                                                                            | 255678_at | 0.7 |
| putative RNA helicase similar to ATP-dependent RNA helicases                                                                                       | 255688_at | 0.7 |
| S-adenosylmethionine synthase 2 ;supported by full-length cDNA: Ceres:36518.                                                                       | 255552_at | 0.7 |
| CTP synthase - like protein                                                                                                                        | 255529_at | 0.7 |
| putative serine/threonine protein kinase                                                                                                           | 255488_at | 0.7 |
| hypothetical protein similar to A. thaliana hypothetical protein F15K9.11, GenBank accession number AC005278                                       | 255452_at | 0.7 |
| predicted protein of unknown function ; supported by full-length cDNA: Ceres: 711.                                                                 | 255434_at | 0.7 |
| putative phosphofructokinase beta subunit                                                                                                          | 255365_at | 0.7 |
| putative leucyl tRNA synthetase                                                                                                                    | 255328_at | 0.7 |
| F-box protein family, AtFBW2 contains similarity to N7 protein GI:3273101 from [Medicago truncatula];supported by full-length cDNA: Ceres:11257.   | 255066_at | 0.7 |
| putative protein 24 kDa seed maturation protein - Glycine max,PID:g4102690;supported by full-length cDNA: Ceres:23536.                             | 254920_at | 0.7 |
| phospholipid hydroperoxide glutathione peroxidase ;supported by full-length cDNA: Ceres:8846.                                                      | 254890_at | 0.7 |
| putative protein predicted protein, Arabidopsis thaliana; supported by full-length cDNA: Ceres: 112156.                                            | 254722_at | 0.7 |
| glycine-rich RNA-binding protein AtGRP2 - like glycine-rich RNA binding protein 2, Arabidopsis thaliana, AJ002892;supported by full-length cDNA: C | 254684_at | 0.7 |
| putative protein                                                                                                                                   | 254645_at | 0.7 |
| heat shock transcription factor - like protein heat shock transcription factor, Zea mays, PIR2:S61448                                              | 254592_at | 0.7 |
| putative protein various predicted proteins                                                                                                        | 254549_at | 0.7 |
| hypothetical protein ;supported by full-length cDNA: Ceres:29391.                                                                                  | 254299_at | 0.7 |
| putative protein similarity Human mRNA for KIAA0156 gen - Homo sapiens, PID:d1010577                                                               | 254147_at | 0.7 |
| Rab geranylgeranyl transferase like protein (fragment) Rab geranylgeranyl transferase (EC 2.5.1.-) alpha chain, human, PIR2:JC5538                 | 254156_at | 0.7 |
| putative protein ; supported by cDNA: gi_15810434_gb_AY056256.1_                                                                                   | 254169_at | 0.7 |
| putative protein apoptosis gene MA3, Suberites domuncula, Y15421; supported by cDNA: gi_17063162_gb_AY062102.1_                                    | 254089_at | 0.7 |
| putative protein similarity to multidrug resistance protein, Mus musculus, PIR1:DVMS1~Contains ABC transporters family signature, (LSGGQRQRV,      | 254068_at | 0.7 |
| splicing factor At-SRp40 contains EST gb:T45156, H3766800; supported by cDNA: gi_1667581_gb_U76607.1_ATU76607                                      | 254073_at | 0.7 |
| putative protein hypothetical protein YOR261c, yeast, PIR2:S67158;supported by full-length cDNA: Ceres:36616.                                      | 253969_at | 0.7 |
| putative APG protein proline-rich protein APG - Arabidopsis thaliana, EMBL:X60377;supported by full-length cDNA: Ceres:2574.                       | 253946_at | 0.7 |
| kinesin-related protein katB ; supported by cDNA: gi_1438841_dbj_D21137.1_ATHKATB                                                                  | 253903_at | 0.7 |
| protein phosphatase homolog (PPH1)                                                                                                                 | 253834_at | 0.7 |
| putative protein predicted protein, Arabidopsis thaliana                                                                                           | 253783_at | 0.7 |
| gamma-glutamyltransferase-like protein gamma-glutamyltransferase - Arabidopsis thaliana,PIR2:S58286                                                | 253708_at | 0.7 |
| putative protein, fragment prolidase - Suberites domuncula.PID:e1289868                                                                            | 253719_at | 0.7 |
| putative protein predicted protein, Arabidopsis thaliana, PIR2:T01287; supported by cDNA: gi_15810172_gb_AY056100.1_                               | 253649_at | 0.7 |
| putative villin                                                                                                                                    | 253663_at | 0.7 |
| kinase binding protein - like Skb1 protein homolog, Homo sapiens, PIR2:T03842                                                                      | 253558_at | 0.7 |
| hypothetical protein ;supported by full-length cDNA: Ceres:151518.                                                                                 | 253520_at | 0.7 |
| predicted protein ; supported by cDNA: gi_15292824_gb_AY050846.1_                                                                                  | 253524_at | 0.7 |
| putative protein microtubule-associated protein 1B (MAP1B), Homo sapiens, L06237                                                                   | 253497_at | 0.7 |
| putative protein tom-1B protein, Gallus gallus                                                                                                     | 253418_at | 0.7 |
| carbonate dehydratase - like protein carbonate dehydratase precursor, Spinacia oleracea,PIr2:S28797;supported by full-length cDNA: Ceres:6589.     | 253300_at | 0.7 |
| hypothetical protein                                                                                                                               | 253314_at | 0.7 |
| putative protein proyl 4-hydroxylase alpha(II)-subunit, Mus musculus, PIR2:I49135;supported by full-length cDNA: Ceres:2306.                       | 253321_at | 0.7 |
| putative protein ethylene-responsive element binding protein homolog, Stylosanthes hamata, U91857                                                  | 253259_at | 0.7 |
| putative protein                                                                                                                                   | 253189_at | 0.7 |
| putative protein various predicted proteins;supported by full-length cDNA: Ceres:206573.                                                           | 253198_at | 0.7 |
| putative protein probable membrane protein YBL019w, yeast, PIR2:S45753                                                                             | 253126_at | 0.7 |
| NAD(P)H oxidoreductase, isoflavone reductase - like protein Pycr2, Pyrus communis, AF071477                                                        | 252939_at | 0.7 |
| SEC14 - like protein phosphatidylinositol-phosphatidylcholine transfer protein SEC14, Yarowia lipolytica, PIR2:S43745; supported by cDNA: gi_143   | 252884_at | 0.7 |
| shikimate kinase - like protein shikimate kinase precursor, Lycopersicon esculentum, gb:S21584                                                     | 252900_at | 0.7 |
| putative protein crp1 protein, Zea mays, EMBL:AF073522                                                                                             | 252904_at | 0.7 |
| putative protein ;supported by full-length cDNA: Ceres:5968.                                                                                       | 252880_at | 0.7 |
| DnaJ - like protein DnaJ-like protein, Pisum sativum, Z71640; supported by cDNA: gi_15450580_gb_AY052658.1_                                        | 252828_at | 0.7 |
| ubiquitin-specific protease 3 (UBP3) identical to GI:2347098; supported by cDNA: gi_2347097_gb_U76845.1_ATU76845                                   | 252832_at | 0.7 |
| guanine nucleotide-exchange - like protein brefeldin A-inhibited guanine nucleotide-exchange protein 2, Homo sapiens, EMBL:AF084521                | 252743_at | 0.7 |
| putative protein predicted protein, C.elegans, PIR:T24538                                                                                          | 252680_at | 0.7 |
| putative protein KIAA0073, Homo sapiens, EMBL:HSORF006                                                                                             | 252644_at | 0.7 |
| disease resistance protein homolog disease resistance protein RPP1-WsB - Arabidopsis thaliana, EMBL:AF098963                                       | 252648_at | 0.7 |
| putative protein Mlo-h1 protein - Hordeum vulgare, PIR:T05952; supported by cDNA: gi_14091575_gb_AF369564.1_AF369564                               | 252572_at | 0.7 |
| putative protein potential transcriptional repressor Not4hp - Mus musculus, EMBL:U71269                                                            | 252588_at | 0.7 |
| receptor protein kinase -like receptor-like protein kinase precursor, Madagascar periwinkle, PIR:T10060                                            | 252512_at | 0.7 |
| putative protein various predicted genes, Arabidopsis thaliana and Oryza sativa                                                                    | 252462_at | 0.7 |
| putative protein putative protein - Arabidopsis thaliana, EMBL:CAB36749.1                                                                          | 252335_at | 0.7 |
| NAC2-like protein NAC2 - Arabidopsis thaliana, EMBL:AF201456; supported by cDNA: gi_16604578_gb_AY059734.1_                                        | 252278_at | 0.7 |
| F-box protein family, AtFBL16 contains similarity to SKP1 interacting partner 2 GI:10716949 from [Arabidopsis thaliana]                            | 252242_at | 0.7 |
| putative protein hypothetical protein KIAA0453 (fragment), Homo sapiens, PIR:T00067                                                                | 252208_at | 0.7 |
| crooked neck-like protein crooked neck protein (CRN) - Drosophila melanogaster, SWISSPROT:CRN_DROME; supported by cDNA: gi_15293116_               | 252100_at | 0.7 |
| putative protein 150-kD protein cluA - Dictyostelium discoideum,PID:g2281117                                                                       | 252031_at | 0.7 |
| ABC transporter - like protein ATP-binding cassette-sub-family G-member 2, Mus musculus, EMBL:AF140218                                             | 251826_at | 0.7 |
| P-glycoprotein - like P-glycoprotein (pmdr1), Solanum tuberosum, EMBL:U52079                                                                       | 251781_at | 0.7 |
| putative protein various predicted proteins;supported by full-length cDNA: Ceres:205700.                                                           | 251800_at | 0.7 |
| putative protein EXOENZYMES REGULATORY PROTEIN AEPA PRECURSOR, SWISSPROT:AEPA_ERWCA; supported by cDNA: gi_16209665_                               | 251717_at | 0.7 |
| calcium-dependent protein kinase calcium-dependent protein kinase - Fragaria x ananassa, EMBL:AF035944                                             | 251636_at | 0.7 |
| 40S ribosomal protein S2 homolog 40S ribosomal protein S2 - Arabidopsis thaliana, SWISSPROT:RS2_ARATH;supported by full-length cDNA: Cere          | 251638_at | 0.7 |
| putative protein hypothetical protein T24P15.4 - Arabidopsis thaliana, PIR:T00923;supported by full-length cDNA: Ceres:1979.                       | 251559_at | 0.7 |
| serine/threonine-specific protein kinase -like protein serine/threonine-specific protein kinase NAK, Arabidopsis thaliana, PIR:S38326              | 251539_at | 0.7 |
| cysteine synthase                                                                                                                                  | 251487_at | 0.7 |
| DEAD box RNA helicase RH12                                                                                                                         | 251362_at | 0.7 |
| putative protein putative protein At2g46260 - Arabidopsis thaliana, EMBL:AC005397; supported by cDNA: gi_12006854_gb_AF292397.1_AF29239;           | 251328_at | 0.7 |
| auxin response factor-like protein auxin response factor 9 - Arabidopsis thaliana, PIR:T08917; supported by cDNA: gi_16604602_gb_AY059746.1_       | 251289_at | 0.7 |
| multifunctional aminoacyl-tRNA ligase-like protein multifunctional aminoacyl-tRNA ligase - Homo sapiens, PIR:SYHUQT; supported by cDNA: gi_16i     | 251264_at | 0.7 |
| ATP-dependent RNA helicase-like protein ATP-dependent RNA helicase (EC 3.6.-.) - Homo sapiens, PIR:JC5785                                          | 251265_at | 0.7 |
| putative protein hypothetical protein BAA87851.1 - Oryza sativa, EMBL:AP000816                                                                     | 251267_at | 0.7 |
| Sar1-like GTP binding protein small GTP-binding protein Bsar1a - Brassica campestris, EMBL:U55035                                                  | 251217_at | 0.7 |
| putative membrane protein clone:2-72. - Mus musculus, EMBL:AB030201; supported by cDNA: gi_15724186_gb_AF411796.1_AF411796                         | 251222_at | 0.7 |

|                                                                                                                                                       |           |     |
|-------------------------------------------------------------------------------------------------------------------------------------------------------|-----------|-----|
| hypothetical protein                                                                                                                                  | 251224_at | 0.7 |
| rac-GTP binding protein -like RACC small GTP binding protein, Zea mays, EMBL:AF126054; supported by cDNA: gi_16648802_gb_AY058178.1_                  | 251158_at | 0.7 |
| F-box protein family, AtFBL3 contains similarity to leucine-rich repeats containing F-box protein FBL3 GI:5919219 from [Homo sapiens]                 | 251104_at | 0.7 |
| putative protein peroxisomal Ca-dependent solute carrier - Oryctolagus cuniculus, EMBL:AF004161;supported by full-length cDNA: Ceres:249772.          | 251106_at | 0.7 |
| putative protein putative hydrolase At2g32150 - Arabidopsis thaliana, EMBL:AC006223;supported by full-length cDNA: Ceres:36724.                       | 251028_at | 0.7 |
| DP-2 transcription factor - like transcription factor DP-2, Homo sapiens, PIR:A57381                                                                  | 251052_at | 0.7 |
| dnaK-type molecular chaperone hsc70.1                                                                                                                 | 250995_at | 0.7 |
| putative protein various predicted proteins, Arabidopsis thaliana                                                                                     | 250879_at | 0.7 |
| cellulose synthase catalytic subunit (gb)AAC39336.1) ; supported by cDNA: gi_2827142_gb_AF027174.1_AF027174                                           | 250827_at | 0.7 |
| putative protein contains similarity to endo-beta-N-acetylglucosaminidase                                                                             | 250775_at | 0.7 |
| arginine-tRNA-protein transferase 1 homolog ; supported by cDNA: gi_3806097_gb_AF079100.1_AF079100                                                    | 250754_at | 0.7 |
| putative protein similar to unknown protein (pir T27191);supported by full-length cDNA: Ceres:249722.                                                 | 250532_at | 0.7 |
| flavonol synthase (FLS) (sp)Q96330) ;supported by full-length cDNA: Ceres:23924.                                                                      | 250533_at | 0.7 |
| microbody NAD-dependent malate dehydrogenase ; supported by cDNA: gi_14335145_gb_AY037252.1_                                                          | 250498_at | 0.7 |
| alpha-glucosidase 1 ; supported by cDNA: gi_15450744_gb_AY053414.1_                                                                                   | 250336_at | 0.7 |
| putative protein strong similarity to unknown protein (emb CAB87679.1)                                                                                | 250326_at | 0.7 |
| dihydropyrimidinase ; supported by cDNA: gi_13878036_gb_AF370281.1_AF370281                                                                           | 250318_at | 0.7 |
| putative protein contains similarity to unknown protein (gb)AAF03441.1)                                                                               | 250218_at | 0.7 |
| putative protein COP9 complex subunit 3, Mus musculus, EMBL:AF071313;supported by full-length cDNA: Ceres:121028.                                     | 250188_at | 0.7 |
| putative protein various predicted proteins, Arabidopsis thaliana                                                                                     | 250144_at | 0.7 |
| putative protein                                                                                                                                      | 250077_at | 0.7 |
| translocon Tic40-like protein ; supported by cDNA: gi_16226312_gb_AF428299.1_AF428299                                                                 | 250080_at | 0.7 |
| putative protein unnamed ORF, Mus musculus, EMBL:AB041577; supported by cDNA: gi_11494361_gb_AF280057.1_AF280057                                      | 249998_at | 0.7 |
| putative protein predicted proteins, Arabidopsis thaliana                                                                                             | 250005_at | 0.7 |
| FAR1 - like protein far-red impaired response protein (FAR1), Arabidopsis thaliana, EMBL:AF159587                                                     | 249953_at | 0.7 |
| putative protein predicted proteins, Arabidopsis thaliana;supported by full-length cDNA: Ceres:37828.                                                 | 249957_at | 0.7 |
| kinase associated protein phosphatase ; supported by cDNA: gi_15027992_gb_AY045853.1_                                                                 | 249924_at | 0.7 |
| unknown protein                                                                                                                                       | 249841_at | 0.7 |
| putative protein contains similarity to unknown protein (emb)CAB62012.1)                                                                              | 249806_at | 0.7 |
| unknown protein                                                                                                                                       | 249740_at | 0.7 |
| acetyl-CoA synthetase ; supported by cDNA: gi_15028046_gb_AY045880.1_                                                                                 | 249638_at | 0.7 |
| promoter-binding protein like ascorbate oxidase promoter-binding protein, winter squash, PIR:T09661; supported by cDNA: gi_15983796_gb_AY0505         | 249415_at | 0.7 |
| putative protein KIAA0409 protein, Homo sapiens, EMBL:AB007869                                                                                        | 249360_at | 0.7 |
| protein import receptor TOM20, mitochondrial-like                                                                                                     | 249322_at | 0.7 |
| putative protein similar to unknown protein (gb)AAD56319.1)                                                                                           | 249298_at | 0.7 |
| homeotic protein BEL1 homolog ; supported by cDNA: gi_15146192_gb_AY049237.1_                                                                         | 249309_at | 0.7 |
| putative protein similar to unknown protein (gb)AAF18661.1);supported by full-length cDNA: Ceres:7878.                                                | 249199_at | 0.7 |
| putative protein contains similarity to unknown protein (dbj)BAA76827.1); supported by cDNA: gi_14532601_gb_AY039925.1_                               | 249181_at | 0.7 |
| ATP sulfurylase precursor (gb)AAD26634.1)                                                                                                             | 249112_at | 0.7 |
| alcohol dehydrogenase (EC 1.1.1.1) class III (pir S71244) ;supported by full-length cDNA: Ceres:33315.                                                | 249077_at | 0.7 |
| nuclear cap-binding protein; CBP20 (gb)AAD29697.1) non-consensus AT donor splice site at exon 5; supported by                                         | 249036_at | 0.7 |
| cyclin-dependent protein kinase-like protein ; supported by cDNA: gi_15983484_gb_AF424617.1_AF424617                                                  | 249050_at | 0.7 |
| putative protein contains similarity to unknown;supported by full-length cDNA: Ceres:4029.                                                            | 249025_at | 0.7 |
| putative protein strong similarity to unknown protein (gb)AAC61825.1); supported by cDNA: gi_15081732_gb_AY048259.1_                                  | 248976_at | 0.7 |
| unknown protein                                                                                                                                       | 248996_at | 0.7 |
| pectin acetyltransferase ;supported by full-length cDNA: Ceres:39005.                                                                                 | 248968_at | 0.7 |
| urea active transporter-like protein                                                                                                                  | 248970_at | 0.7 |
| unknown protein                                                                                                                                       | 248956_at | 0.7 |
| unknown protein ;supported by full-length cDNA: Ceres:40096.                                                                                          | 248738_at | 0.7 |
| unknown protein ;supported by full-length cDNA: Ceres:25275.                                                                                          | 248709_at | 0.7 |
| putative protein similar to unknown protein (gb)AAF31026.1)                                                                                           | 248648_at | 0.7 |
| heat shock protein 70 (gb)AAF27639.1) ; supported by cDNA: gi_6746591_gb_AF217459.1_AF217459                                                          | 248582_at | 0.7 |
| FRO1 and FRO2-like protein                                                                                                                            | 248540_at | 0.7 |
| putative protein contains similarity to unknown protein (pir T05510)                                                                                  | 248499_at | 0.7 |
| histone acetyltransferase ;supported by full-length cDNA: Ceres:123936.                                                                               | 248508_at | 0.7 |
| putative protein similar to unknown protein (pir S76207);supported by full-length cDNA: Ceres:258748.                                                 | 248459_at | 0.7 |
| unknown protein                                                                                                                                       | 248293_at | 0.7 |
| ATP-dependent Clp protease ATP-binding subunit ClpX1 identical to CLP protease regulatory subunit CLPX GI:2674203 from [Arabidopsis thaliana]         | 248255_at | 0.7 |
| putative protein similar to unknown protein (gb)AAF34839.1); supported by cDNA: gi_13926341_gb_AF372918.1_AF372918                                    | 248230_at | 0.7 |
| putative protein strong similarity to unknown protein (pir T04799)                                                                                    | 248095_at | 0.7 |
| putative protein contains similarity to cytochrome oxidase assembly factor                                                                            | 248049_at | 0.7 |
| unknown protein                                                                                                                                       | 248006_at | 0.7 |
| 26S proteasome AAA-ATPase subunit RPT3 (gb)AAF22523.1)                                                                                                | 247810_at | 0.7 |
| phosphoinositide specific phospholipase C ; supported by cDNA: gi_1526413_dbj_D38544.1_ATHATPLC1                                                      | 247794_at | 0.7 |
| S-receptor kinase homolog 2 precursor S-receptor kinase homolog 2 precursor, Arabidopsis thaliana, PIR:S27754                                         | 247602_at | 0.7 |
| pseudo-response regulator 1 ; supported by cDNA: gi_7576353_dbj_AB041530.1_AB041530                                                                   | 247525_at | 0.7 |
| putative protein rhoGAP, Homo sapiens, EMBL:Z23024; supported by full-length cDNA: Ceres: 152557.                                                     | 247545_at | 0.7 |
| peptide methionine sulfoxide reductase - like protein peptide methionine sulfoxide reductase, Arabidopsis thaliana, PIR:T49886; supported by full-len | 247514_at | 0.7 |
| putative protein strong similarity to unknown protein (emb)CAB86899.1)                                                                                | 247389_at | 0.7 |
| beta-xylosidase                                                                                                                                       | 247266_at | 0.7 |
| putative protein similar to unknown protein (ref)NP_014115.1);supported by full-length cDNA: Ceres:14033.                                             | 247249_at | 0.7 |
| 4-alpha-glucanotransferase ; supported by cDNA: gi_14335103_gb_AY037231.1_                                                                            | 247216_at | 0.7 |
| oligopeptidase A ; supported by cDNA: gi_15028226_gb_AY045936.1_                                                                                      | 247152_at | 0.7 |
| amino acid transporter protein-like                                                                                                                   | 247120_at | 0.7 |
| anthranilate N-hydroxycinnamoyl/benzoyltransferase-like protein ;supported by full-length cDNA: Ceres:32856.                                          | 247038_at | 0.7 |
| unknown protein                                                                                                                                       | 246961_at | 0.7 |
| threonyl-tRNA synthetase ; supported by cDNA: gi_15081625_gb_AY048205.1_                                                                              | 246801_at | 0.7 |
| NHE1 Na+/H+ exchanger ; supported by cDNA: gi_6650176_gb_AF056190.1_AF056190                                                                          | 246763_at | 0.7 |
| seryl-tRNA synthetase ; supported by cDNA: gi_15293240_gb_AY051054.1_                                                                                 | 246780_at | 0.7 |
| putative protein clathrin assembly protein short form, Rattus norvegicus, EMBL:AF041373                                                               | 246653_at | 0.7 |
| putative protein predicted proteins, Arabidopsis thaliana;supported by full-length cDNA: Ceres:40501.                                                 | 246611_at | 0.7 |
| hypothetical protein                                                                                                                                  | 246513_at | 0.7 |
| valine--tRNA ligase-like protein several bacterial valine--tRNA ligases                                                                               | 246509_at | 0.7 |
| carbonic anhydrase, putative similar to carbonic anhydrase 1 GI:882241 from [Flaveria linearis]                                                       | 246396_at | 0.7 |
| 30S ribosomal protein S11, putative contains Pfam profile: PF00411: Ribosomal protein S11; supported by full-length cDNA: Ceres: 36981.               | 246266_at | 0.7 |
| putative protein                                                                                                                                      | 246245_at | 0.7 |
| heat shock transcription factor HSF4 ; supported by cDNA: gi_1619920_gb_U68017.1_ATU68017                                                             | 246214_at | 0.7 |

|                                                                                                                                                      |             |     |
|------------------------------------------------------------------------------------------------------------------------------------------------------|-------------|-----|
| Expressed protein ; supported by full-length cDNA: Ceres: 37542.                                                                                     | 246193_at   | 0.7 |
| protein kinase tousled ; supported by cDNA: gi_433051_gb_L23985.1_ATHTGPA                                                                            | 246134_at   | 0.7 |
| receptor-like protein kinase - like protein receptor-like protein kinase, Arabidopsis thaliana, EMBL:M84659;supported by full-length cDNA: Ceres:206 | 246146_at   | 0.7 |
| cytochrome-b5 reductase - like protein cytochrome-b5 reductase, Saccharomyces cerevisiae, PIR:S37800;supported by full-length cDNA: Ceres:33         | 246157_at   | 0.7 |
| putative protein predicted protein, Oryza sativa; supported by cDNA: gi_15146277_gb_AY049280.1_                                                      | 246126_at   | 0.7 |
| putative protein serine-arginine-rich splicing regulatory protein SRRP86, Rattus norvegicus, EMBL:AF234765                                           | 246039_at   | 0.7 |
| putative protein predicted proteins, Arabidopsis thaliana and Synechocystis sp.                                                                      | 246057_at   | 0.7 |
| glucose-6-phosphate 1-dehydrogenase                                                                                                                  | 245977_at   | 0.7 |
| aspartate aminotransferase Asp2 ; supported by cDNA: gi_693689_gb_U15033.1_ATU15033                                                                  | 245951_at   | 0.7 |
| putative protein HERC2 - Homo sapiens, EMBL:AF071172                                                                                                 | 245851_at   | 0.7 |
| unknown protein contains similarity to transfactor GB:BAA75684 GI:4519671 from [Nicotiana tabacum]; supported by cDNA: gi_15723594_gb_AY04           | 245758_at   | 0.7 |
| hypothetical protein contains similarity to cockayne syndrome complementation group A protein GB:U28413 GI:975301 from [Homo sapiens]                | 245764_s_at | 0.7 |
| unknown protein contains similarity to calmodulin GI:166304 from [Achlya klebsiana]; supported by cDNA: gi_13358218_gb_AF325029.2_AF325029           | 245732_at   | 0.7 |
| hypothetical protein                                                                                                                                 | 245600_at   | 0.7 |
| Expressed protein ; supported by full-length cDNA: Ceres: 307.                                                                                       | 245321_at   | 0.7 |
| putative protein ; supported by cDNA: gi_13358188_gb_AF324997.2_AF324997                                                                             | 245308_at   | 0.7 |
| cytosolic O-acetylserine(thiol)ylase (EC 4.2.99.8) ; supported by cDNA: gi_15027936_gb_AY045825.1_                                                   | 245286_at   | 0.7 |
| glucosyltransferase like protein ; supported by cDNA: gi_2149126_gb_U81293.1_ATU81293                                                                | 245277_at   | 0.7 |
| hypothetical protein ; supported by cDNA: gi_16226250_gb_AF428283.1_AF428283                                                                         | 245269_at   | 0.7 |
| putative TGACG-sequence-specific bZIP DNA-binding protein                                                                                            | 245092_at   | 0.7 |
| unknown protein ; supported by cDNA: gi_16930450_gb_AF419579.1_AF419579                                                                              | 245119_at   | 0.7 |
| putative cyclin ;supported by full-length cDNA: Ceres:22595.                                                                                         | 245043_at   | 0.7 |
| PSII K protein                                                                                                                                       | 245050_at   | 0.7 |
| cytochrome b/f                                                                                                                                       | 244977_at   | 0.7 |
| 3-methyl-2-oxobutanoate hydroxy-methyl-transferase                                                                                                   | 266598_at   | 0.7 |
| unknown protein                                                                                                                                      | 267030_at   | 0.6 |
| pEARLI 4 protein Same as GB: L43081; supported by cDNA: gi_871781_gb_L43081.1_ATHPEARA                                                               | 265440_at   | 0.6 |
| unknown protein ; supported by cDNA: gi_14334723_gb_AY035035.1_                                                                                      | 264485_at   | 0.6 |
| putative ribonucleoside-diphosphate reductase large subunit ; supported by cDNA: gi_14334813_gb_AY035080.1_                                          | 263882_at   | 0.6 |
| hypothetical protein predicted by genscan+                                                                                                           | 263220_at   | 0.6 |
| unknown protein ;supported by full-length cDNA: Ceres:93312.                                                                                         | 262607_at   | 0.6 |
| unknown protein contains Pfam profile:PF00560 Leucine Rich Repeat                                                                                    | 258212_at   | 0.6 |
| eukaryotic translation elongation factor 2, putative similar to eukaryotic translation elongation factor 2 GB:NP_001952 [Homo sapiens]               | 257758_at   | 0.6 |
| phosphatidylinositol-4-phosphate 5-kinase, putative similar to phosphatidylinositol-4-phosphate 5-kinase GI:3702691 from [Arabidopsis thaliana]; su  | 255959_at   | 0.6 |
| putative sugar transporter                                                                                                                           | 255295_at   | 0.6 |
| putative protein several hypothetical proteins - Arabidopsis thaliana                                                                                | 254803_at   | 0.6 |
| hypothetical protein ; supported by cDNA: gi_15982924_gb_AY057570.1_                                                                                 | 253374_at   | 0.6 |
| putative protein dJ69E11.3, Homo sapiens, AL021397                                                                                                   | 253287_at   | 0.6 |
| Expressed protein ; supported by full-length cDNA: Ceres: 114014.                                                                                    | 252822_at   | 0.6 |
| putative protein merozoite surface antigen 2, Plasmodium falciparum, PIR:A45637                                                                      | 252112_at   | 0.6 |
| putative protein PrMC3, Pinus radiata, EMBL:AF110333                                                                                                 | 251200_at   | 0.6 |
| putative protein contains similarity to unknown protein (gb)AAAF72944.1)                                                                             | 250525_at   | 0.6 |
| pre-mRNA splicing factor ATP-dependent RNA helicase -like protein PRE-MRNA SPLICING FACTOR ATP-DEPENDENT RNA HELICASE PRP16,                         | 250273_at   | 0.6 |
| putative protein contains similarity to polyA polymerase                                                                                             | 249821_at   | 0.6 |
| disease resistance protein-like                                                                                                                      | 248873_at   | 0.6 |
| ras-related small GTP-binding protein-like ;supported by full-length cDNA: Ceres:1492.                                                               | 248792_at   | 0.6 |
| EspB-like protein                                                                                                                                    | 248276_at   | 0.6 |
| putative protein                                                                                                                                     | 246283_at   | 0.6 |
| Arabidopsis thaliana /REF=U37281 /DEF=actin-2 mRNA, complete cds /LEN=1637 (5_ ,M_ ,3 represent transcript regions 5 prime, Middle, and 3'-          | 246193_at   | 0.6 |
| putative RING zinc finger protein ; supported by cDNA: gi_16648813_gb_AY058184.1_                                                                    | 267539_at   | 0.6 |
| unknown protein                                                                                                                                      | 267524_at   | 0.6 |
| putative serine carboxypeptidase II ; supported by cDNA: gi_14517521_gb_AY039596.1_                                                                  | 267264_at   | 0.6 |
| aspartate aminotransferase (AAT1) identical to GB:U15026;supported by full-length cDNA: Ceres:34360.                                                 | 267151_at   | 0.6 |
| putative ADP ribosylation factor 1 GTPase activating protein ; supported by cDNA: gi_14334619_gb_AY034983.1_                                         | 267179_at   | 0.6 |
| putative MYB family transcription factor                                                                                                             | 267141_at   | 0.6 |
| hypothetical protein predicted by genefinder                                                                                                         | 267063_at   | 0.6 |
| unknown protein                                                                                                                                      | 267068_at   | 0.6 |
| putative DnaJ protein                                                                                                                                | 267070_at   | 0.6 |
| hypothetical protein predicted by genscan                                                                                                            | 267031_at   | 0.6 |
| putative urease accessory protein ; supported by full-length cDNA: Ceres: 18513.                                                                     | 267001_at   | 0.6 |
| putative choline kinase ;supported by full-length cDNA: Ceres:37620.                                                                                 | 266861_at   | 0.6 |
| putative protein kinase contains a protein kinase domain profile (PDOC00100)                                                                         | 266803_at   | 0.6 |
| unknown protein                                                                                                                                      | 266732_at   | 0.6 |
| unknown protein ; supported by cDNA: gi_15810142_gb_AY056136.1_                                                                                      | 266609_at   | 0.6 |
| hypothetical protein predicted by genscan and genefinder                                                                                             | 266574_at   | 0.6 |
| cycloartenol synthase identical to SP:P38605; supported by cDNA: gi_452445_gb_U02555.1_U02555                                                        | 266495_at   | 0.6 |
| putative cysteinyl-tRNA synthetase ; supported by cDNA: gi_15293250_gb_AY051059.1_                                                                   | 266478_at   | 0.6 |
| unknown protein ; supported by cDNA: gi_16612316_gb_AF439849.1_AF439849                                                                              | 266480_at   | 0.6 |
| 20S proteasome subunit C8 (PAG1/PRC8_ARATH) identical to GB:Y13693;supported by full-length cDNA: Ceres:8342.                                        | 266312_at   | 0.6 |
| putative proliferating cell nuclear antigen, PCNA ;supported by full-length cDNA: Ceres:342.                                                         | 266297_at   | 0.6 |
| putative RNA-binding protein ; supported by cDNA: gi_16226862_gb_AF428354.1_AF428354                                                                 | 266240_at   | 0.6 |
| chloroplast membrane protein (ALBINO3) identical to GB:U89272;supported by full-length cDNA: Ceres:31457.                                            | 266224_at   | 0.6 |
| putative C2H2-type zinc finger protein                                                                                                               | 266110_at   | 0.6 |
| chloroplast single subunit DNA-dependent RNA polymerase identical to GB:Y08722                                                                       | 265991_at   | 0.6 |
| putative ribophorin I                                                                                                                                | 265858_at   | 0.6 |
| putative DnaJ protein                                                                                                                                | 265850_at   | 0.6 |
| unknown protein                                                                                                                                      | 265793_at   | 0.6 |
| hypothetical protein predicted by genscan                                                                                                            | 265698_at   | 0.6 |
| putative RAD50 DNA repair protein ; supported by cDNA: gi_7110147_gb_AF168748.1_AF168748                                                             | 265678_at   | 0.6 |
| unknown protein ; supported by cDNA: gi_15450376_gb_AY052289.1_                                                                                      | 265657_at   | 0.6 |
| 12-oxophytodienoate-10,11-reductase ; supported by cDNA: gi_15294261_gb_AF410322.1_AF410322                                                          | 265530_at   | 0.6 |
| similar to cold acclimation protein WCOR413 [Triticum aestivum] ;supported by full-length cDNA: Ceres:7835.                                          | 265480_at   | 0.6 |
| unknown protein                                                                                                                                      | 265398_at   | 0.6 |
| unknown protein ;supported by full-length cDNA: Ceres:91878.                                                                                         | 265375_at   | 0.6 |
| hypothetical protein                                                                                                                                 | 265228_s_at | 0.6 |
| branched-chain alpha-keto acid decarboxylase E1 beta subunit similar to Bovine branched chain alpha-keto acid dehydrogenase (BCKDHB) E1-beta         | 265070_at   | 0.6 |
| putative prohibitin 2 B-cell receptor associated protein;supported by full-length cDNA: Ceres:6208.                                                  | 265037_at   | 0.6 |

|                                                                                                                                                             |             |     |
|-------------------------------------------------------------------------------------------------------------------------------------------------------------|-------------|-----|
| putative glucanase                                                                                                                                          | 264875_at   | 0.6 |
| putative glycosylation enzyme ; supported by cDNA: gi_15292806_gb_AY050837.1_                                                                               | 264844_at   | 0.6 |
| unknown protein similar to beta-galactoside alpha-2,3-sialyltransferase (pir JC5251)                                                                        | 264793_at   | 0.6 |
| unknown protein similar to ESTs emb Z46294, gb W43468, and gb W43475                                                                                        | 264795_at   | 0.6 |
| unknown protein similar to C-1 (Homo sapiens) (U41816); supported by full-length cDNA: Ceres: 20276.                                                        | 264778_at   | 0.6 |
| hypothetical protein predicted by genscan                                                                                                                   | 264689_at   | 0.6 |
| putative acetyl-CoA acyltransferase Strong similarity to Cucumis acetyl-CoA acyltransferase (gb D70895);supported by full-length cDNA: Ceres:1258           | 264608_at   | 0.6 |
| putative prolyl 4-hydroxylase, alpha subunit ;supported by full-length cDNA: Ceres:36054.                                                                   | 264592_at   | 0.6 |
| auxin-resistance protein AXR1 E1 ubiquitin-like activating enzyme; identical to GB:P42744; supported by cDNA: gi_15215701_gb_AY050379.1_                    | 264585_at   | 0.6 |
| hypothetical protein predicted by genemark.hmm                                                                                                              | 264542_at   | 0.6 |
| hypothetical protein predicted by genscan; supported by cDNA: gi_15450913_gb_AY054537.1_                                                                    | 264447_at   | 0.6 |
| unknown protein similar to salt-inducible protein (gi 375717); similar to ESTs gb R30192 and gb AA651017                                                    | 264452_at   | 0.6 |
| ribosomal protein identical to ribosomal protein Gl:166858 from [Arabidopsis thaliana];supported by full-length cDNA: Ceres:14534.                          | 264421_at   | 0.6 |
| hypothetical protein similar to membrane protein PTM1 precursor isolog Gl:1931644 from [Arabidopsis thaliana]                                               | 264429_at   | 0.6 |
| spermidine synthase, putative similar to spermidine synthase Gl:4138109 from [Lycopersicon esculentum]; supported by cDNA: gi_14030636_gb_A                 | 264317_at   | 0.6 |
| hypothetical protein contains similarity to glucosidase I Gl:2344809 from [Homo sapiens]                                                                    | 264228_at   | 0.6 |
| putative sucrose transport protein, SUC2 strong similarity to GB:S38196 sucrose transport protein SUC2 from [Arabidopsis thaliana];supported by fu          | 264204_at   | 0.6 |
| hypothetical protein contains Pfam profile: PF01535 PPR repeat                                                                                              | 264177_at   | 0.6 |
| hypothetical protein predicted by genscan                                                                                                                   | 264064_at   | 0.6 |
| MADS-box protein (AGL3) ; supported by cDNA: gi_1737494_gb_U81369.1_ATU81369                                                                                | 264041_at   | 0.6 |
| unknown protein                                                                                                                                             | 263976_at   | 0.6 |
| putative MAP kinase ; supported by cDNA: gi_15724283_gb_AF412082.1_AF412082                                                                                 | 263989_at   | 0.6 |
| putative shikimate kinase precursor                                                                                                                         | 263897_at   | 0.6 |
| putative eukaryotic translation initiation factor 2 alpha subunit, eIF2 ;supported by full-length cDNA: Ceres:13800.                                        | 263835_at   | 0.6 |
| putative plasma membrane proton ATPase                                                                                                                      | 263791_at   | 0.6 |
| unknown protein ;supported by full-length cDNA: Ceres:36719.                                                                                                | 263796_at   | 0.6 |
| Expressed protein ; supported by cDNA: gi_15027870_gb_AY045792.1_                                                                                           | 263763_at   | 0.6 |
| ankyrin-like protein EST gb ATTS0956 comes from this gene;supported by full-length cDNA: Ceres:108617.                                                      | 263662_at   | 0.6 |
| putative DNA-directed RNA polymerase II subunit                                                                                                             | 263621_at   | 0.6 |
| putative Rieske iron-sulfur protein ;supported by full-length cDNA: Ceres:29774.                                                                            | 263533_at   | 0.6 |
| putative ATP-dependent RNA helicase                                                                                                                         | 263493_at   | 0.6 |
| putative protein kinase contains a protein kinase domain profile (PDOC00100)                                                                                | 263461_at   | 0.6 |
| putative receptor-like protein kinase ; supported by cDNA: gi_16648754_gb_AY058153.1_                                                                       | 263478_at   | 0.6 |
| unknown protein                                                                                                                                             | 263456_at   | 0.6 |
| unknown protein ;supported by full-length cDNA: Ceres:120231.                                                                                               | 263303_at   | 0.6 |
| unknown protein ; supported by cDNA: gi_15027886_gb_AY045800.1_                                                                                             | 263331_at   | 0.6 |
| unknown protein similar to ribonuclease inhibitors; supported by cDNA: gi_15810394_gb_AY056236.1_                                                           | 263212_at   | 0.6 |
| hypothetical protein Similar to hexosaminidase, gi 1170249, gi 1076942 and others                                                                           | 263199_at   | 0.6 |
| unknown protein                                                                                                                                             | 263171_at   | 0.6 |
| myrosinase-associated protein, putative similar to myrosinase-associated protein Gl:1769967 from [Brassica napus];supported by full-length cDNA:            | 263156_at   | 0.6 |
| cytochrome P450, putative similar to cytochrome P450 Gl:4176420 from [Arabidopsis thaliana]                                                                 | 263120_at   | 0.6 |
| hypothetical protein contains similarity to serine threonine kinase Gl:166813 from [Arabidopsis thaliana]; supported by cDNA: gi_14334553_gb_AY0263111_s_at | 263111_s_at | 0.6 |
| hypothetical protein predicted by genscan and genefinder;supported by full-length cDNA: Ceres:95679.                                                        | 263097_at   | 0.6 |
| unknown protein ;supported by full-length cDNA: Ceres:21947.                                                                                                | 262945_at   | 0.6 |
| pyruvate dehydrogenase e1 alpha subunit, putative similar to pyruvate dehydrogenase e1 alpha subunit Gl:473168 from [Solanum tuberosum];supp                | 262908_at   | 0.6 |
| unknown protein contains Pfam profile: PF01417 ENTH domain                                                                                                  | 262856_at   | 0.6 |
| hypothetical protein predicted by genscan                                                                                                                   | 262770_at   | 0.6 |
| unknown protein                                                                                                                                             | 262700_at   | 0.6 |
| flavin-containing amine oxidase contains Pfam profile: PF01593 Flavin containing amine oxidase                                                              | 262668_at   | 0.6 |
| unknown protein ;supported by full-length cDNA: Ceres:1505.                                                                                                 | 262609_at   | 0.6 |
| DEIH-box RNA/DNA helicase identical to DEIH-box RNA/DNA helicase GB:BAA84364 Gl:5881579 [Arabidopsis thaliana]; supported by cDNA: gi_5E                    | 262636_at   | 0.6 |
| hypothetical protein predicted by genscan+                                                                                                                  | 262565_at   | 0.6 |
| Expressed protein ; supported by full-length cDNA: Ceres: 6612.                                                                                             | 262512_at   | 0.6 |
| unknown protein Contains similarity to gb U07707 epidermal growth factor receptor substrate (eps15) from Homo sapiens and contains 2 PF 00036 E             | 262492_at   | 0.6 |
| leaf development protein Argonaute identical to GB:AAC18440 from (Arabidopsis thaliana); supported by cDNA: gi_2149639_gb_U91995.1_ATU919                   | 262246_at   | 0.6 |
| unknown protein contains similarity to translation initiation factor eIF-2B Gl:623032 from [Rattus norvegicus]                                              | 262253_s_at | 0.6 |
| eukaryotic initiation factor 5 (eIF-5), putative similar to eukaryotic initiation factor 5 (eIF-5) Gl:1008880 from [Phaseolus vulgaris]                     | 262193_at   | 0.6 |
| sulfate transporter, putative similar to sulfate transporter Gl:2114106 from [Arabidopsis thaliana]; supported by cDNA: gi_1498119_dbj_D85416.1_A           | 262134_at   | 0.6 |
| hypothetical protein predicted by genscan+; supported by cDNA: gi_6520211_dbj_AB028226.1_AB028226                                                           | 262078_at   | 0.6 |
| hypothetical protein                                                                                                                                        | 262062_s_at | 0.6 |
| protein disulfide isomerase, putative similar to GB:AAA85099 Gl:687235 from [Onchocerca volvulus]; supported by cDNA: gi_14423497_gb_AF386E                 | 262024_at   | 0.6 |
| CCR4-associated factor, putative 0CCR4-associated factor, putative similar to CCR4-ASSOCIATED FACTOR 1 GB:Q60809 from [Mus musculus] 0                      | 261887_at   | 0.6 |
| hypothetical protein predicted by genemark.hmm; supported by cDNA: gi_14517415_gb_AY039543.1_                                                               | 261861_at   | 0.6 |
| S-ribonuclease binding protein SBP1, putative similar to S-ribonuclease binding protein SBP1 Gl:6760451 from [Petunia hybrida];supported by full-le         | 261832_at   | 0.6 |
| RNA-binding protein, putative similar to RNA-binding protein GB:CAB40027 Gl:4539439 from [Arabidopsis thaliana];supported by full-length cDNA: i            | 261709_at   | 0.6 |
| lysophospholipase homolog, putative similar to lysophospholipase homolog GB:AAB97366 Gl:2801536 from [Oryza sativa]                                         | 261661_at   | 0.6 |
| Expressed protein ; supported by full-length cDNA: Ceres: 107675.                                                                                           | 261676_at   | 0.6 |
| receptor kinase, putative similar to receptor kinase Gl:4105699 from [Arabidopsis thaliana]                                                                 | 261498_at   | 0.6 |
| unknown protein                                                                                                                                             | 261465_at   | 0.6 |
| protein kinase, putative similar to CRK1 protein Gl:7671528 from [Beta vulgaris]                                                                            | 261427_at   | 0.6 |
| pectinesterase, putative similar to GB:Z94058 from [Lycopersicon esculentum]; supported by cDNA: gi_16648888_gb_AY059814.1_                                 | 261363_at   | 0.6 |
| MAP kinase BnMAP4K alpha1, putative similar to BnMAP4K alpha1 Gl:3819697 from (Brassica napus)                                                              | 261316_at   | 0.6 |
| aminoacylase, putative similar to aminoacylase I Gl:1844 from [Sus scrofa]                                                                                  | 261326_s_at | 0.6 |
| growth regulator protein similar to GB:X80301 from [Nicotiana tabacum]                                                                                      | 261170_at   | 0.6 |
| unknown protein ;supported by full-length cDNA: Ceres:40419.                                                                                                | 261144_s_at | 0.6 |
| unknown protein                                                                                                                                             | 261075_at   | 0.6 |
| transformer-SR ribonucleoprotein, putative similar to GB:Y09506 from [Nicotiana tabacum] (Plant Mol. Biol. 35 (3), 261-269 (1997)); supported by cE         | 261081_at   | 0.6 |
| hypothetical protein similar to hypothetical protein GB:CAB80918 Gl:7267606 from [Arabidopsis thaliana]                                                     | 261052_at   | 0.6 |
| hypothetical protein predicted by genemark.hmm                                                                                                              | 261053_at   | 0.6 |
| unknown protein ;supported by full-length cDNA: Ceres:11931.                                                                                                | 261014_at   | 0.6 |
| hypothetical protein predicted by genemark.hmm                                                                                                              | 260993_at   | 0.6 |
| glyoxalase II isozyme, putative similar to glyoxalase II isozyme GB:AAC49865 Gl:2570338 from [Arabidopsis thaliana];supported by full-length cDNA/          | 260954_at   | 0.6 |
| hypothetical protein contains similarity to MTN3 (nodule development protein) GB:Y08726 Gl:1619601 from [Medicago truncatula];supported by full-l           | 260876_at   | 0.6 |
| unknown protein                                                                                                                                             | 260751_at   | 0.6 |
| actin 8 almost identical to actin 8 Gl:1669389 from [Arabidopsis thaliana];supported by full-length cDNA: Ceres:34479.                                      | 260765_at   | 0.6 |
| Expressed protein ; supported by full-length cDNA: Ceres: 29302.                                                                                            | 260769_at   | 0.6 |
| unknown protein ; supported by cDNA: gi_15810124_gb_AY056127.1_                                                                                             | 260675_at   | 0.6 |

|                                                                                                                                                       |             |     |
|-------------------------------------------------------------------------------------------------------------------------------------------------------|-------------|-----|
| Unknown protein ; supported by cDNA: gi_15028352_gb_AY045979.1_                                                                                       | 260508_at   | 0.6 |
| unknown protein ; supported by full-length cDNA: Ceres: 2381.                                                                                         | 260442_at   | 0.6 |
| putative RNA-binding protein similar to RNA-binding protein GB:S46286 from [Nicotiana sylvestris]                                                     | 260245_at   | 0.6 |
| putative MYB family transcription factor contains Pfam profile: PF00249 Myb-like DNA-binding domain; similar to N-term of myb GB:CAA72218 [Oryz       | 260237_at   | 0.6 |
| unknown protein contains zinc finger, C3HC4 type (RING finger) domain                                                                                 | 260168_at   | 0.6 |
| unknown protein ;supported by full-length cDNA: Ceres:108165.                                                                                         | 260099_at   | 0.6 |
| ethylene-insensitive3-like3 (EIL3) identical to ethylene-insensitive3-like3 (EIL3) GB:AF004215 [Arabidopsis thaliana] (Cell 89 (7), 1133-1144 (1997)) | 260064_at   | 0.6 |
| beta-1,3-glucanase precursor, putative similar to GI:4097948 from [Oryza sativa] (Gene 223 (1-2), 311-320 (1998))                                     | 259823_at   | 0.6 |
| RNA and export factor binding protein, putative similar to GI:7159943 from [Mus musculus] (RNA 6 (4), 638-650 (2000)); supported by cDNA: gi_15;      | 259825_at   | 0.6 |
| spore coat protein-like protein similar to SPORE COAT PROTEIN A GB:P07788 from [Bacillus subtilis] and BILLIRUBIN OXIDASE GB:Q12737 [Myro             | 259752_at   | 0.6 |
| putative cleavage and polyadenylation specificity factor similar to cleavage and polyadenylation specificity factor 73 kDa subunit GB:AAF00224 from   | 259717_at   | 0.6 |
| disease resistance protein contains domains associated with disease resistance genes in plants: TIR/NB-ARC/LRR                                        | 259629_at   | 0.6 |
| hypothetical protein                                                                                                                                  | 259560_at   | 0.6 |
| hypothetical protein ; supported by cDNA: gi_1518449_gb_U43340.1_ATU43340                                                                             | 259517_at   | 0.6 |
| hypothetical protein ; supported by cDNA: gi_9954167_gb_AF159052.1_AF159052                                                                           | 259513_at   | 0.6 |
| unknown protein ; supported by cDNA: gi_15028126_gb_AY046013.1_                                                                                       | 259501_at   | 0.6 |
| hypothetical protein predicted by genemark.hmm;supported by full-length cDNA: Ceres:6115.                                                             | 259436_at   | 0.6 |
| protein serine/threonine kinase, putative similar to protein serine/threonine kinase GI:7248457 from [Lophopyrum elongatum]; supported by cDNA: g     | 259437_at   | 0.6 |
| DNA binding protein GT-1, putative similar to DNA binding protein GT-1 GI:598073 from (Arabidopsis thaliana)                                          | 259412_at   | 0.6 |
| methionine aminopeptidase I (MAP1), putative similar to methionine aminopeptidase I (MAP1) GI:975722 from [Saccharomyces cerevisiae]; support         | 259363_at   | 0.6 |
| putative cytoskeleton-associated protein similar to cytoskeleton-associated protein 1 GB:4502849 [Homo sapiens]                                       | 259141_at   | 0.6 |
| putative mitogen activated protein kinase kinase similar to mitogen activated protein kinase kinase GB:AAC32599 [Oryza sativa]                        | 259080_at   | 0.6 |
| hypothetical protein predicted by genscan+;supported by full-length cDNA: Ceres:19154.                                                                | 259037_at   | 0.6 |
| unknown protein                                                                                                                                       | 258949_at   | 0.6 |
| putative 26S proteasome regulatory subunit                                                                                                            | 258871_at   | 0.6 |
| unknown protein ; supported by cDNA: gi_15294217_gb_AF410300.1_AF410300                                                                               | 258839_at   | 0.6 |
| putative RNA-binding protein similar putative nucleic acid binding protein GB:CAB39665 [Arabidopsis thaliana]; Pfam HMM hit: KH domain family of I    | 258790_at   | 0.6 |
| putative bZIP transcription factor contains Pfam profile: PF00170 bZIP transcription factor; contains similarity to TGACG-sequence specific DNA-binc  | 258759_at   | 0.6 |
| hydroxyacylglutathione hydrolase cytoplasmic (glyoxalase II) (GLX II) identical to hydroxyacylglutathione hydrolase cytoplasmic (glyoxalase II) (GLX  | 258775_at   | 0.6 |
| shaggy related protein kinase, ASK-GAMMA identical to GB:P43289;supported by full-length cDNA: Ceres:17739.                                           | 258743_s_at | 0.6 |
| putative pectate lyase similar to pectate lyase precursor GB:P40972 from [Nicotiana tabacum]                                                          | 258719_at   | 0.6 |
| unknown protein similar to hypothetical protein KIAA0188 GB: Q14693 from [Homo sapiens]                                                               | 258721_at   | 0.6 |
| unknown protein                                                                                                                                       | 258698_at   | 0.6 |
| putative RHO GDP-dissociation inhibitor 1 similar to RHO GDP-dissociation inhibitor 1 GB:P19803 [Bos taurus];supported by full-length cDNA: Ceres     | 258637_at   | 0.6 |
| putative protein kinase similar to protein kinase (APK1A) GB:Q06548 [Arabidopsis thaliana]; contains Pfam profile: PF00069 Eukaryotic protein kinas   | 258650_at   | 0.6 |
| hypothetical protein predicted by genscan+                                                                                                            | 258505_at   | 0.6 |
| neutral invertase, putative similar to neutral invertase GB:CAA76145 from [Daucus carota] (Physiol. Plantarum (1999) 107, 159-165)                    | 258507_at   | 0.6 |
| unknown protein                                                                                                                                       | 258502_at   | 0.6 |
| unknown protein ;supported by full-length cDNA: Ceres:38468.                                                                                          | 258435_at   | 0.6 |
| hypothetical protein contains similarity to ion channel protein from [Arabidopsis thaliana]; supported by cDNA: gi_8131897_gb_AF148541.1_AF1485       | 258351_at   | 0.6 |
| unknown protein ; supported by cDNA: gi_13358213_gb_AF325024.2_AF325024                                                                               | 258223_at   | 0.6 |
| hypothetical protein predicted by genemark.hmm;supported by full-length cDNA: Ceres:20484.                                                            | 258161_at   | 0.6 |
| rubisco expression protein, putative similar to GB:O22034 from [Cyanidium caldarium] (J. Plant Res. 110, 235-245 (1997));supported by full-length c   | 258134_at   | 0.6 |
| Expressed protein ; supported by cDNA: gi_15912240_gb_AY056398.1_                                                                                     | 258140_at   | 0.6 |
| hypothetical protein                                                                                                                                  | 258141_at   | 0.6 |
| putative WD-repeat protein (WDR1-like) similar to WDR1 protein GB:AAD05042 [Gallus gallus] (Genomics 56 (1), 59-69 (1999))                            | 258146_at   | 0.6 |
| putative MAP kinase similar to blast and wounding induced mitogen-activated protein kinase (BWMK1) GB:AAD52659 [Oryza sativa]; contains Pfam          | 258123_at   | 0.6 |
| Expressed protein ; supported by full-length cDNA: Ceres: 26411.                                                                                      | 258092_at   | 0.6 |
| unknown protein ;supported by full-length cDNA: Ceres:40534.                                                                                          | 258040_at   | 0.6 |
| unknown protein                                                                                                                                       | 257983_at   | 0.6 |
| putative myc-like DNA-binding protein similar to GB:AAB72192 from [Arabidopsis thaliana]                                                              | 257990_at   | 0.6 |
| hypothetical protein predicted by genemark;supported by full-length cDNA: Ceres:108568.                                                               | 257967_at   | 0.6 |
| ribosomal protein, putative similar to 60S ribosomal protein L5 GB:P49625 from [Oryza sativa];supported by full-length cDNA: Ceres:32753.             | 257906_at   | 0.6 |
| alpha-mannosidase, putative similar to lysosomal alpha-mannosidase GB:AAC34130 [Homo sapiens] (Hum. Mol. Genet. 6 (5), 717-726 (1997)); sup           | 257834_at   | 0.6 |
| hypothetical protein predicted by genscan+                                                                                                            | 257248_at   | 0.6 |
| hypothetical protein predicted by genscan+                                                                                                            | 257208_at   | 0.6 |
| unknown protein ;supported by full-length cDNA: Ceres:256351.                                                                                         | 257150_at   | 0.6 |
| cytochrome P450, putative contains Pfam profile: PF00067 cytochrome P450                                                                              | 257112_at   | 0.6 |
| hypothetical protein predicted by genemark.hmm                                                                                                        | 257000_at   | 0.6 |
| hypothetical protein contains similarity to flavonol synthase (FLS) GB:Q41452 from [Solanum tuberosum], contains Pfam profile: PF00671 Iron/Asco      | 256922_at   | 0.6 |
| hypothetical protein ; supported by cDNA: gi_15293218_gb_AY051043.1_                                                                                  | 256881_at   | 0.6 |
| RNA-binding protein, putative similar to RNA-binding protein (RZ-1) GB:BAA12064 [Nicotiana sylvestris]; contains Pfam profile: PF00076 RNA reco       | 256882_at   | 0.6 |
| unknown protein                                                                                                                                       | 256658_at   | 0.6 |
| hypothetical protein                                                                                                                                  | 256585_at   | 0.6 |
| unknown protein ;supported by full-length cDNA: Ceres:20812.                                                                                          | 256523_at   | 0.6 |
| putative disease resistance protein similar to disease resistance protein GB:AAC78591 [Lycopersicon esculentum]                                       | 256431_s_at | 0.6 |
| MYB-family transcription factor, putative contains Pfam profile: PF00249 Myb-like DNA-binding domain;supported by full-length cDNA: Ceres:10939;      | 256255_at   | 0.6 |
| auxin conjugate hydrolase (ILL5) identical to auxin conjugate hydrolase [Arabidopsis thaliana] (ILL5) GI:5725649;contains nonconsensus AT acceptc     | 256178_s_at | 0.6 |
| unknown protein                                                                                                                                       | 256041_at   | 0.6 |
| calcium dependent protein kinase, putative similar to calcium dependent protein kinase GI:587499 from [Oryza sativa]                                  | 255936_at   | 0.6 |
| Deetiolated1 (DET1) light signal transduction protein                                                                                                 | 255799_at   | 0.6 |
| predicted protein                                                                                                                                     | 255713_s_at | 0.6 |
| putative calmodulin-binding heat shock protein                                                                                                        | 255677_at   | 0.6 |
| hypothetical protein                                                                                                                                  | 255616_at   | 0.6 |
| hypothetical protein ;supported by full-length cDNA: Ceres:25253.                                                                                     | 255586_at   | 0.6 |
| putative ABC transporter                                                                                                                              | 255594_at   | 0.6 |
| contains similarity to a protein kinase domain (Pfam: pkinase.hmm, score: 166.20) and to legume lectins beta domain (Pfam: lectin_legB.hmm, scor      | 255502_at   | 0.6 |
| putative glycosyltransferase similar to A. thaliana protein T20K9.11, GenBank accession number 3445207; supported by cDNA: gi_16209668_gb_A           | 255483_at   | 0.6 |
| putative GH3-like protein similar to soybean GH3 auxin-inducible protein, GenBank accession number X60033; supported by cDNA: gi_16649142_g           | 255403_at   | 0.6 |
| putative malonyl-CoA decarboxylase                                                                                                                    | 255327_at   | 0.6 |
| Arabidopsis thaliana flavin-type blue-light photoreceptor (SW:Q43125) (Pfam: PF00875, Score=765.2, E=2.6e-226, N=1) ; supported by cDNA: gi_1         | 255068_at   | 0.6 |
| calmodulin-domain protein kinase CDPK isoform 4 (CPK4)                                                                                                | 255039_at   | 0.6 |
| putative protein ; supported by full-length cDNA: Ceres: 93362.                                                                                       | 254957_at   | 0.6 |
| hypothetical protein ; supported by cDNA: gi_16648694_gb_AY058123.1_                                                                                  | 254814_at   | 0.6 |
| putative trehalose-6-phosphate phosphatase (ATTPA) trehalose-6-phosphate phosphatase - Arabidopsis thaliana, PID:g2944178; supported by cD            | 254806_at   | 0.6 |
| SERINE CARBOXYPEPTIDASE I PRECURSOR-like protein SERINE CARBOXYPEPTIDASE I PRECURSOR - Hordeum vulgare, SWall:CBP1_HC                                 | 254791_at   | 0.6 |
| putative protein HYA22 protein, Homo sapiens, PIR2:JC5707                                                                                             | 254681_at   | 0.6 |

|                                                                                                                                                       |             |     |
|-------------------------------------------------------------------------------------------------------------------------------------------------------|-------------|-----|
| teosinte branched1 - like protein teosinte branched1 protein - Zea mays, PIR2:T04347                                                                  | 254670_at   | 0.6 |
| aspartate kinase-homoserine dehydrogenase - like protein ak-hsdh bifunctional enzyme precursor, Arabidopsis thaliana, PIR2:S46497                     | 254535_at   | 0.6 |
| lectin like protein lectin phloem protein PP2, winter squash, PIR2:S38462;supported by full-length cDNA: Ceres:17437.                                 | 254551_at   | 0.6 |
| putative protein gamma-SNAP protein, bovine, PIR2:S32369;supported by full-length cDNA: Ceres:267158.                                                 | 254476_at   | 0.6 |
| hypothetical protein                                                                                                                                  | 254455_at   | 0.6 |
| Translation factor EF-1 alpha - like protein translation factor EF-1 alpha genfamily, Arabidopsis thaliana, PATCHX:G1532164                           | 254300_at   | 0.6 |
| putative protein rape mRNA, Brassica napus, PIR2:S42651                                                                                               | 254259_s_at | 0.6 |
| putative protein ;supported by full-length cDNA: Ceres:20769.                                                                                         | 254164_at   | 0.6 |
| putative protein histidine-rich calcium-binding protein precursor, rabbit, PIR2:A34373                                                                | 254143_at   | 0.6 |
| ubiquitin-specific protease 16 (UBP16), putative similar to ubiquitin-specific protease 16 GI:11993477 [Arabidopsis thaliana]; supported by cDNA: gi_ | 254128_at   | 0.6 |
| putative protein cylicin II - human, PID:g758587; supported by cDNA: gi_14423517_gb_AF386996.1_AF386996                                               | 254058_at   | 0.6 |
| putative protein immunophilin FKBP46 - Spodoptera frugiperda (fall armyworm),PIR2:A55320; supported by cDNA: gi_15982871_gb_AY057543.1_               | 254076_at   | 0.6 |
| putative protein various predicted proteins, Arabidopsis thaliana; supported by full-length cDNA: Ceres: 122917.                                      | 254048_at   | 0.6 |
| putative protein                                                                                                                                      | 253941_at   | 0.6 |
| putative protein Ran_GTP binding protein 5, Homo sapiens, Y08890                                                                                      | 253881_at   | 0.6 |
| hypothetical protein                                                                                                                                  | 253888_at   | 0.6 |
| putative protein zinc-finger protein S12569, Oryza sativa, PIR3:JE0115;supported by full-length cDNA: Ceres:41557.                                    | 253854_at   | 0.6 |
| arginine methyltransferase (pam1) ; supported by full-length cDNA: Ceres: 38601.                                                                      | 253695_at   | 0.6 |
| putative protein KIAA0210 gene, Homo sapiens, gb:D86965; supported by cDNA: gi_5032257_gb_AF126057.2_AF126057                                         | 253647_at   | 0.6 |
| putative protein component of aniline dioxygenase (GMP synthase like protein) - Acinetobacter sp.,PID:d1013698;supported by full-length cDNA: Ce      | 253639_at   | 0.6 |
| aspartate-tRNA ligase - like protein aspartyl tRNA synthetase, Drosophila melanogaster, EMBL:AF113612                                                 | 253561_at   | 0.6 |
| monogalactosyldiacylglycerol synthase - like protein monogalactosyldiacylglycerol synthase, Cucumis sativus, PID:g1805254; supported by cDNA: g       | 253489_at   | 0.6 |
| putative protein myosin heavy chain-B, neuronal - Gallus gallus,PIR:B43402; supported by cDNA: gi_13430501_gb_AF360163.1_AF360163                     | 253425_at   | 0.6 |
| putative potassium transporter AtKT5p (AtKT5)                                                                                                         | 253330_at   | 0.6 |
| putative protein acetylpolypamine aminohydrolase (aphA) homolog -Archaeoglobus fulgidus,PIR2:B69266; supported by cDNA: gi_15529219_gb_AY             | 253337_at   | 0.6 |
| dynamamin-like protein ADL2                                                                                                                           | 253306_at   | 0.6 |
| putative protein ;supported by full-length cDNA: Ceres:8161.                                                                                          | 253322_at   | 0.6 |
| caffeoyl-CoA O-methyltransferase - like protein caffeoyl-CoA 3-O-methyltransferase, Populus tremuloides, PID:G857578;supported by full-length cD      | 253276_at   | 0.6 |
| extra-large G-protein - like extra-large G-protein, Arabidopsis thaliana, AF060942                                                                    | 253257_at   | 0.6 |
| putative protein                                                                                                                                      | 253208_at   | 0.6 |
| ankyrin repeat-containing protein 2 ;supported by full-length cDNA: Ceres:34698.                                                                      | 253139_at   | 0.6 |
| plasma membrane-type calcium ATPase (ACA2) ; supported by cDNA: gi_3335059_gb_AF025842.1_AF025842                                                     | 253063_at   | 0.6 |
| putative protein                                                                                                                                      | 253022_at   | 0.6 |
| hypothetical protein                                                                                                                                  | 253025_at   | 0.6 |
| putative protein                                                                                                                                      | 252990_at   | 0.6 |
| putative transcription factor (MYB4) ; supported by cDNA: gi_3941411_gb_AF062860.1_AF062860                                                           | 252958_at   | 0.6 |
| phenylalanyl-trna synthetase - like protein phenylalanyl-trna synthetase beta chain, cytosolic,Saccharomyces cerevisiae, PIR1:YFBYAC                  | 252941_at   | 0.6 |
| putative protein various predicted proteins, Arabidopsis thaliana                                                                                     | 252901_at   | 0.6 |
| nucleic acid binding protein-like nucleic acid binding protein - Oryza sativa, PIR:T02745                                                             | 252764_at   | 0.6 |
| putative protein predicted protein, Drosophila melanogaster, EMBL:AE003789                                                                            | 252738_at   | 0.6 |
| putative histone deacetylase similar to maize nucleolar histone deacetylase (U82815); supported by cDNA: gi_11066134_gb_AF195545.1_AF19554            | 252625_at   | 0.6 |
| cystine proteinase AALP, putative similar to AALP protein GI:7230640 from [Arabidopsis thaliana] and barley aleurain                                  | 252622_at   | 0.6 |
| histidyl-tRNA synthetase ; supported by cDNA: gi_3659908_gb_AF020715.1_AF020715                                                                       | 252516_at   | 0.6 |
| putative protein mitotic phosphoprotein 90 - Xenopus laevis, EMBL:U95102;supported by full-length cDNA: Ceres:114884.                                 | 252478_at   | 0.6 |
| putative protein sn-glycerol-3-phosphate permease - Haemophilus influenzae,PID:g3603157; supported by cDNA: gi_13430515_gb_AF360170.1_A               | 252414_at   | 0.6 |
| putative protein N7 protein - Medicago truncatula, EMBL:CAA76808;supported by full-length cDNA: Ceres:99337.                                          | 252336_at   | 0.6 |
| RNA-directed RNA polymerase RNA-directed RNA polymerase                                                                                               | 252261_at   | 0.6 |
| putative protein mRNA of unknown function, Homo sapiens, EMBL:HS598F21A_1                                                                             | 252207_at   | 0.6 |
| protein kinase SPK-2 ;supported by full-length cDNA: Ceres:3988.                                                                                      | 252166_at   | 0.6 |
| putative clathrin coat assembly protein clathrin coat assembly protein-like - Homo sapiens, PID:g1669533                                              | 252188_at   | 0.6 |
| putative protein ATP binding protein - Homo sapiens, PID:d1022739                                                                                     | 252127_at   | 0.6 |
| putative protein hypothetical protein - Synechocystis sp., EMBL:D90903;supported by full-length cDNA: Ceres:266414.                                   | 252122_at   | 0.6 |
| plastid division protein FtsZ-like FtsZ protein, Gentiana lutea, EMBL:AF205859; supported by cDNA: gi_14488049_gb_AF384167.1_AF384167                 | 252001_at   | 0.6 |
| putative protein predicted proteins, Arabidopsis thaliana                                                                                             | 252014_at   | 0.6 |
| AP3-complex beta-3A adaptin subunit-like protein AP-3 complex beta3A subunit, Homo sapiens, EMBL:HSU91931; supported by cDNA: gi_166046               | 251808_at   | 0.6 |
| tetrahydrofolylpolyglutamate synthase precursor - like protein tetrahydrofolylpolyglutamate synthase precursor, Mus musculus, PIR:S65755; support     | 251759_at   | 0.6 |
| putative protein exostose-related protein 2, Homo sapiens, PIR:JC5935                                                                                 | 251764_at   | 0.6 |
| putative protein conserved hypothetical protein SPCC330.09 - Schizosaccharomyces pombe, PIR:T41319                                                    | 251678_at   | 0.6 |
| putative protein polygalacturonase (EC 3.2.1.15) precursor, Erwinia carotovora, PIR:S11773                                                            | 251645_at   | 0.6 |
| putative protein contains alternative donor splice site TT at exon 2,hypothetical protein C1444.1 - Caenorhabditis elegans, PIR:T19243; supported b   | 251578_at   | 0.6 |
| putative protein hypothetical protein At2g44090- Arabidopsis thaliana, EMBL:AC004005                                                                  | 251437_at   | 0.6 |
| beta-tubulin cofactor - like protein beta-tubulin folding cofactor D, Homo sapiens, EMBL:HSA6417                                                      | 251383_at   | 0.6 |
| putative protein rec, Homo sapiens, EMBL:AB023584                                                                                                     | 251386_at   | 0.6 |
| dihydrodipicolinate synthase precursor ;supported by full-length cDNA: Ceres:37907.                                                                   | 251392_at   | 0.6 |
| proteasome component C5 ;supported by full-length cDNA: Ceres:26273.                                                                                  | 251337_at   | 0.6 |
| 60S RIBOSOMAL PROTEIN L7A protein 60S RIBOSOMAL PROTEIN L7A - Oryza sativa, SWISSPROT:RL7A_ORYSA;supported by full-length cD                          | 251185_at   | 0.6 |
| putative protein CGI-77 protein, Homo sapiens, EMBL:AF151836;supported by full-length cDNA: Ceres:153131.                                             | 251149_at   | 0.6 |
| hypothetical protein ; supported by cDNA: gi_15292666_gb_AY050767.1_                                                                                  | 251083_at   | 0.6 |
| putative protein RING-H2 finger protein RHA3a - Arabidopsis thaliana, EMBL:AF078824                                                                   | 251066_at   | 0.6 |
| putative protein receptor protein kinases                                                                                                             | 251071_at   | 0.6 |
| DnaJ homologue (gb AAB91418.1) ; supported by cDNA: gi_2689719_gb_AF037168.1_AF037168                                                                 | 250672_at   | 0.6 |
| unknown protein ; supported by cDNA: gi_16648868_gb_AY059804.1_                                                                                       | 250540_at   | 0.6 |
| ACTIN 2/7 (sp P53492) ; supported by cDNA: gi_1049306_gb_U37281.1_ATU37281                                                                            | 250458_s_at | 0.6 |
| argininosuccinate lyase (AtArgH) ; supported by cDNA: gi_15028082_gb_AY045898.1_                                                                      | 250403_at   | 0.6 |
| putative protein ribulose-1,5-bisphosphate carboxylase/oxygenase small subunit N-methyltransferase I, Spinacia oleracea chloroplast, pir:T08996       | 250170_at   | 0.6 |
| acetolactate synthase-like protein                                                                                                                    | 250111_at   | 0.6 |
| unknown protein                                                                                                                                       | 250104_at   | 0.6 |
| phytoene synthase (gb AAB65697.1) ;supported by full-length cDNA: Ceres:15761.                                                                        | 250095_at   | 0.6 |
| chromo domain protein polycomb-like protein, Daucus carota, PIR:T14294; supported by cDNA: gi_15625406_gb_AF387639.1_AF387639                         | 250060_at   | 0.6 |
| GTP-binding protein obg -like GTP-binding protein obg, Bacillus subtilis, PIR:B32804                                                                  | 249993_at   | 0.6 |
| putative protein predicted proteins, Homo sapiens, Schizosaccharomyces pombe, Caenorhabditis elegans, Saccharomyces cerevisiae, Drosophila r          | 249925_at   | 0.6 |
| histone deacetylase-like protein non-consensus AT donor splice site at exon 3, AC acceptor splice site at exon 4                                      | 249901_at   | 0.6 |
| glucosyltransferase-like protein ; supported by cDNA: gi_16648763_gb_AY058158.1_                                                                      | 249911_at   | 0.6 |
| putative protein similar to unknown protein (gb AAD12714.1)                                                                                           | 249845_at   | 0.6 |
| nucleolar protein-like                                                                                                                                | 249672_at   | 0.6 |
| putative protein unnamed ORF, Homo sapiens, EMBL:AK001192                                                                                             | 249611_at   | 0.6 |
| receptor protein kinase - like protein receptor serine/threonine kinase PR5K, Arabidopsis thaliana, EMBL:AT48698                                      | 249486_at   | 0.6 |

|                                                                                                                                                                              |           |     |
|------------------------------------------------------------------------------------------------------------------------------------------------------------------------------|-----------|-----|
| disease resistance - like protein resistance gene Cf-4, Lycopersicon hirsutum, EMBL:LHJ002235                                                                                | 249393_at | 0.6 |
| protein kinase-like                                                                                                                                                          | 249293_at | 0.6 |
| SKP1/ASK1 (At2) identical to UIP2 GI:3719211 from [Arabidopsis thaliana]                                                                                                     | 249228_at | 0.6 |
| putative protein similar to unknown protein (emb CAB66408.1);supported by full-length cDNA: Ceres:106836.                                                                    | 249231_at | 0.6 |
| phytochelatin synthase (gb AAD41794.1) ; supported by cDNA: gi_14532653_gb_AY039951.1_                                                                                       | 249078_at | 0.6 |
| tubulin beta-4 chain (sp P24636) ; supported by cDNA: gi_14334935_gb_AY035141.1_                                                                                             | 249049_at | 0.6 |
| unknown protein ;supported by full-length cDNA: Ceres:36901.                                                                                                                 | 248966_at | 0.6 |
| serine threonine protein kinase ; supported by cDNA: gi_14486383_gb_AY035225.1_                                                                                              | 248910_at | 0.6 |
| bHLH protein-like                                                                                                                                                            | 248864_at | 0.6 |
| protein serine threonine kinase-like                                                                                                                                         | 248821_at | 0.6 |
| 40S ribosomal protein S19 ; supported by cDNA: gi_15028320_gb_AY045963.1_                                                                                                    | 248800_at | 0.6 |
| putative protein strong similarity to unknown protein (emb CAB71043.1); supported by cDNA: gi_15810326_gb_AY056202.1_                                                        | 248721_at | 0.6 |
| SCARECROW gene regulator-like ; supported by cDNA: gi_8132288_gb_AF153443.1_AF153443                                                                                         | 248689_at | 0.6 |
| unknown protein ;supported by full-length cDNA: Ceres:147765.                                                                                                                | 248592_at | 0.6 |
| ATP-dependent Clp protease ATP-binding subunit ClpX2, putative similar to CLP protease regulatory subunit CLPX GI:2674203 from [Arabidopsis thaliana]                        | 248575_at | 0.6 |
| arginine-aspartate-rich RNA binding protein-like ; supported by cDNA: gi_1699050_gb_U78867.1_ATU78867                                                                        | 248403_at | 0.6 |
| putative protein contains similarity to peptidase                                                                                                                            | 248426_at | 0.6 |
| photoassimilate-responsive protein PAR-like protein ;supported by full-length cDNA: Ceres:17872.                                                                             | 248333_at | 0.6 |
| developmental protein SINA (seven in absentia)                                                                                                                               | 248256_at | 0.6 |
| NADH-dependent glutamate synthase                                                                                                                                            | 248267_at | 0.6 |
| putative protein similar to unknown protein (sp P29618);supported by full-length cDNA: Ceres:95459.                                                                          | 248270_at | 0.6 |
| Expressed protein ; supported by full-length cDNA: Ceres: 2034.                                                                                                              | 248272_at | 0.6 |
| unknown protein                                                                                                                                                              | 248243_at | 0.6 |
| unknown protein                                                                                                                                                              | 248131_at | 0.6 |
| putative protein contains similarity to integral membrane protein                                                                                                            | 248134_at | 0.6 |
| putative protein contains similarity to polyadenylate-binding protein 5; supported by full-length cDNA: Ceres: 107768.                                                       | 248147_at | 0.6 |
| cell division protein FtsZ chloroplast homolog precursor (sp Q42545) ; supported by cDNA: gi_14334637_gb_AY034992.1_                                                         | 248105_at | 0.6 |
| selenium-binding protein-like                                                                                                                                                | 248075_at | 0.6 |
| outward rectifying potassium channel KCO ;supported by full-length cDNA: Ceres:32253.                                                                                        | 248027_at | 0.6 |
| unknown protein ; supported by cDNA: gi_13899122_gb_AF370556.1_AF370556                                                                                                      | 248031_at | 0.6 |
| N-myristoyl transferase ;supported by full-length cDNA: Ceres:36525.                                                                                                         | 247960_at | 0.6 |
| putative protein similar to unknown protein (gb AAD55473.1);supported by full-length cDNA: Ceres:7233.                                                                       | 247931_at | 0.6 |
| protein carboxyl methylase-like                                                                                                                                              | 247926_at | 0.6 |
| unknown protein                                                                                                                                                              | 247907_at | 0.6 |
| SPP30 - like protein SPP30, Solanum chacoense, EMBL:AF136010;supported by full-length cDNA: Ceres:269675.                                                                    | 247842_at | 0.6 |
| outer membrane lipoprotein - like outer membrane lipoprotein, Citrobacter freundii, PIR:I40710;supported by full-length cDNA: Ceres:17098.                                   | 247851_at | 0.6 |
| putative protein Not2p, Homo sapiens, EMBL:AF180473; supported by cDNA: gi_12006938_gb_AF295433.1_AF295433                                                                   | 247695_at | 0.6 |
| replication protein A1 - like probable replication protein A1, Oryza sativa, EMBL:AF009179;supported by full-length cDNA: Ceres:40850.                                       | 247608_at | 0.6 |
| histone deacetylase - like histone deacetylase HDA2, Mus musculus, PIR:T13964                                                                                                | 247558_at | 0.6 |
| calnexin - like protein calnexin homolog, Arabidopsis thaliana, EMBL:AT08315;supported by full-length cDNA: Ceres:2869.                                                      | 247494_at | 0.6 |
| ATOXA1 ;supported by full-length cDNA: Ceres:96723.                                                                                                                          | 247460_at | 0.6 |
| unknown protein ; supported by cDNA: gi_15809801_gb_AY054168.1_                                                                                                              | 247446_at | 0.6 |
| histidinol dehydrogenase ;supported by full-length cDNA: Ceres:40175.                                                                                                        | 247303_at | 0.6 |
| ankyrin-like protein                                                                                                                                                         | 247316_at | 0.6 |
| unknown protein                                                                                                                                                              | 247241_at | 0.6 |
| unknown protein ; supported by cDNA: gi_14334503_gb_AY034943.1_                                                                                                              | 247203_at | 0.6 |
| 3-dehydroquininate synthase-like protein ;supported by full-length cDNA: Ceres:117923.                                                                                       | 247138_at | 0.6 |
| GTP-binding protein-like                                                                                                                                                     | 247098_at | 0.6 |
| unknown protein ;supported by full-length cDNA: Ceres:8440.                                                                                                                  | 246953_at | 0.6 |
| tSNARE ATLG2a ; supported by cDNA: gi_4932458_gb_AF067789.2_AF067789                                                                                                         | 246803_at | 0.6 |
| putative protein hypothetical protein slr1702 - Synechocystis sp., PIR:S75312; supported by cDNA: gi_13877992_gb_AF370259.1_AF370259                                         | 246736_at | 0.6 |
| serine/threonine protein kinase SOS2 (gb AAF62923.1) ; supported by cDNA: gi_14701909_gb_AF395081.1_AF395081                                                                 | 246614_at | 0.6 |
| hypothetical protein predicted by genemark.hmm                                                                                                                               | 246576_at | 0.6 |
| pyrroline-5-carboxylate reductase ;supported by full-length cDNA: Ceres:36386.                                                                                               | 246594_at | 0.6 |
| dolichyl-phosphate-mannose-glycolipid alpha-mannosyltransferase -like protein dolichyl-phosphate-mannose-glycolipid alpha-mannosyltransferase                                | 246598_at | 0.6 |
| N2,N2-dimethylguanine tRNA methyltransferase-like protein several N2,N2-dimethylguanine tRNA methyltransferases                                                              | 246521_at | 0.6 |
| amino acid permease, putative contains Pfam profile: PF00324: Amino acid permease                                                                                            | 246259_at | 0.6 |
| MOLYBDOPTERIN BIOSYNTHESIS CNX1 PROTEIN ; supported by cDNA: gi_1263313_gb_L47323.1_ATHCNX1R                                                                                 | 246131_at | 0.6 |
| putative protein predicted proteins - Arabidopsis thaliana                                                                                                                   | 246112_at | 0.6 |
| putative protein KED, Nicotiana tabacum, EMBL:AB009883                                                                                                                       | 246059_at | 0.6 |
| putative protein ER66 - Lycopersicon esculentum, EMBL:AF096260                                                                                                               | 245910_at | 0.6 |
| putative subunit of TOC complex chloroplast gene Toc64 - Pisum sativum, EMBL:AF179282                                                                                        | 245879_at | 0.6 |
| sulfate transporter ; supported by cDNA: gi_2626752_dbj_AB008782.1_AB008782                                                                                                  | 245855_at | 0.6 |
| G-Box binding protein, putative similar to G-Box binding protein 2 GB:AAD42938 GI:5381313 from [Catharanthus roseus]                                                         | 245786_at | 0.6 |
| hypothetical protein contains similarity to glucosidase II beta-subunit GI:5452942 from [Mus musculus]                                                                       | 245727_at | 0.6 |
| hypothetical protein                                                                                                                                                         | 245619_at | 0.6 |
| phytochrome D                                                                                                                                                                | 245487_at | 0.6 |
| hypothetical protein                                                                                                                                                         | 245374_at | 0.6 |
| casein kinase I ; supported by cDNA: gi_15450524_gb_AY052364.1_                                                                                                              | 245294_at | 0.6 |
| syntaxin ; supported by cDNA: gi_2149379_gb_U85036.1_ATU85036                                                                                                                | 245278_at | 0.6 |
| scarecrow-like 13 (SCL13) ; supported by cDNA: gi_16930432_gb_AF419570.1_AF419570                                                                                            | 245247_at | 0.6 |
| putative protein similarity to NCA2 protein, yeast, PIR:S54389-Contains Homeobox domain signature and profile AA305-328                                                      | 245206_at | 0.6 |
| transcription factor IIB (TFIIB) identical to GB:P48512; contains a transcription factor TFIIB repeat signature (PDOC00624);supported by full-length cDNA                    | 245114_at | 0.6 |
| putative protein kinase contains a protein kinase domain profile (PDOC00100)                                                                                                 | 245074_at | 0.6 |
| ATPase a subunit                                                                                                                                                             | 244995_at | 0.6 |
| ribosomal protein S14                                                                                                                                                        | 245005_at | 0.6 |
| hypothetical protein predicted by genscan                                                                                                                                    | 257447_at | 0.6 |
| putative alpha/beta hydrolase contains Pfam profile: PF00561 alpha/beta hydrolase fold; predicted by genscan                                                                 | 257533_at | 0.6 |
| unknown protein contains Pfam profile:PF00400 WD domain, G-beta repeat                                                                                                       | 257553_at | 0.6 |
| unknown protein ESTs gb AA042402.gb ATTS1380 come from this gene                                                                                                             | 264572_at | 0.6 |
| inositol 1,3,4-trisphosphate 5/6-kinase-like protein inositol 1,3,4-trisphosphate 5/6-kinase (EC 2.7.-.-) - Arabidopsis thaliana, PIR2:JC5401; supported by full-length cDNA | 255132_at | 0.6 |
| putative dolichyl-phosphate beta-glucosyltransferase ; supported by cDNA: gi_15810210_gb_AY056120.1_                                                                         | 266986_at | 0.5 |
| hypothetical protein predicted by genscan                                                                                                                                    | 265521_at | 0.5 |
| putative ARF1 family auxin responsive transcription factor                                                                                                                   | 265454_at | 0.5 |
| hypothetical protein predicted by genscan and graal                                                                                                                          | 265429_at | 0.5 |
| 26S proteasome regulatory subunit, putative similar to GB:AAC04490 from [Arabidopsis thaliana]                                                                               | 261174_at | 0.5 |
| glycine-rich RNA-binding protein grp1a, putative similar to glycine-rich RNA-binding protein grp1a GB:L31374 GI:496232 from [Sinapis alba]                                   | 260923_at | 0.5 |

|                                                                                                                                                        |              |     |
|--------------------------------------------------------------------------------------------------------------------------------------------------------|--------------|-----|
| unknown protein                                                                                                                                        | 260719_at    | 0.5 |
| putative choline kinase similar to GB:AAC49376 from [Glycine max]                                                                                      | 260244_at    | 0.5 |
| shaggy-like kinase, putative similar to Petunia Shaggy kinase 4 GI:619894 from [Petunia hybrida]; supported by cDNA: gi_14334749_gb_AY035048           | 259396_at    | 0.5 |
| putative T-complex protein 1, ETA subunit similar to T-complex protein 1, ETA subunit GB:P80313 [Mus musculus]                                         | 258776_at    | 0.5 |
| unknown protein similar to hypothetical protein GB:CAB10220 from [Arabidopsis thaliana]                                                                | 257916_at    | 0.5 |
| Expressed protein ; supported by full-length cDNA: Ceres: 12588.                                                                                       | 257152_at    | 0.5 |
| putative protein                                                                                                                                       | 254797_at    | 0.5 |
| putative protein DNA polymerase III holoenzyme tau subunit, Thermus thermophilus, gb:AF025391                                                          | 254643_at    | 0.5 |
| putative protein MSP1 protein, Saccharomyces cerevisia, PIR2:A49506;supported by full-length cDNA: Ceres:142160.                                       | 253861_at    | 0.5 |
| serine threonine-protein kinase-like protein Ca2+ calmodulin-dependent protein kinase - Rattus norvegicus, PIR:A57156; supported by cDNA: gi_14        | 252616_at    | 0.5 |
| putative protein                                                                                                                                       | 251725_at    | 0.5 |
| nicotianamine synthase (dbj BAA74589.1)                                                                                                                | 250832_at    | 0.5 |
| putative protein                                                                                                                                       | 250421_at    | 0.5 |
| putative protein strong similarity to unknown protein (pir T04769); supported by cDNA: gi_14030630_gb_AF375406.1_AF375406                              | 248977_at    | 0.5 |
| putative protein contains similarity to unknown protein (dbj BAA13214.1)                                                                               | 248465_at    | 0.5 |
| zinc finger protein                                                                                                                                    | 247054_at    | 0.5 |
| putative protein ;supported by full-length cDNA: Ceres:108509.                                                                                         | 246840_at    | 0.5 |
| putative protein predicted proteins, Arabidopsis thaliana                                                                                              | 245900_at    | 0.5 |
| NADH dehydrogenase subunit 4                                                                                                                           | 244929_at    | 0.5 |
| Arabidopsis thaliana /REF=X52320 /DEF=25S rRNA /LEN=4310                                                                                               | Athal-25SRRN | 0.5 |
| Arabidopsis thaliana /REF=M64116 /DEF=glyceraldehyde 3-phosphate dehydrogenase C subunit (GapC) gene, complete cds /LEN=1295 (_5_/_M_/_thai-GAPDH      | 267152_at    | 0.5 |
| heme oxygenase 1 (HO1) identical to GB:AF132475; annotation updated per Seth J. Davis at University of Wisconsin-Madison; supported by full-len        | 267617_at    | 0.5 |
| putative uricase subunit similar to nodulin-35; identical to GB:Y11120;supported by full-length cDNA: Ceres:38538.                                     | 267374_at    | 0.5 |
| putative translation initiation factor eIF-2B delta subunit                                                                                            | 267229_s_at  | 0.5 |
| GDP dissociation inhibitor identical to GB:D83531;supported by full-length cDNA: Ceres:29536.                                                          | 267236_at    | 0.5 |
| hypothetical protein predicted by grail; supported by full-length cDNA: Ceres: 35095.                                                                  | 267152_at    | 0.5 |
| putative adenosine phosphosulfate kinase identical to GB:U05238;supported by full-length cDNA: Ceres:14216.                                            | 267112_at    | 0.5 |
| unknown protein ;supported by full-length cDNA: Ceres:2337.                                                                                            | 267078_at    | 0.5 |
| unknown protein                                                                                                                                        | 267040_at    | 0.5 |
| hypothetical protein predicted by genefinder                                                                                                           | 267048_at    | 0.5 |
| unknown protein                                                                                                                                        | 267009_at    | 0.5 |
| putative ABC transporter related to multi drug resistance proteins and P-glycoproteins                                                                 | 266856_at    | 0.5 |
| unknown protein ;supported by full-length cDNA: Ceres:26655.                                                                                           | 266657_at    | 0.5 |
| unknown protein ;supported by full-length cDNA: Ceres:12086.                                                                                           | 266646_at    | 0.5 |
| unknown protein ; supported by cDNA: gi_14532581_gb_AY039915.1_                                                                                        | 266315_at    | 0.5 |
| unknown protein ; supported by cDNA: gi_13358176_gb_AF324984.2_AF324984                                                                                | 266207_at    | 0.5 |
| subtilisin-like serine protease, putative contains similarity to cucumis-like serine protease GI:3176874 from [Arabidopsis thaliana]                   | 266022_at    | 0.5 |
| putative carbonyl reductase                                                                                                                            | 266015_at    | 0.5 |
| putative disease resistance protein                                                                                                                    | 265917_at    | 0.5 |
| putative lipase                                                                                                                                        | 265646_at    | 0.5 |
| putative ferredoxin ; supported by full-length cDNA: Ceres: 26333.                                                                                     | 265649_at    | 0.5 |
| unknown protein                                                                                                                                        | 265570_at    | 0.5 |
| putative N-acetylglucosaminyltransferase                                                                                                               | 265366_at    | 0.5 |
| unknown protein                                                                                                                                        | 265098_at    | 0.5 |
| putative lysine/histidine-specific permease similar to GB:AAC49885, similar to EST gb T13994; supported by cDNA: gi_9293859_dbj_AB046210.1_            | 265002_at    | 0.5 |
| auxin-induced protein, putative similar to auxin-induced atb2 GI:6562980 from [Arabidopsis thaliana]; supported by cDNA: gi_6562979_gb_AF05771         | 264928_at    | 0.5 |
| putative ligand-gated ion channel protein similar to ligand-gated ion channels and to A. thaliana protein T21B4.3; supported by cDNA: gi_2708330_g     | 264853_at    | 0.5 |
| hypothetical protein similar to putative serine/threonine kinase GI:4585880 from [Arabidopsis thaliana];supported by full-length cDNA: Ceres:13461.    | 264767_at    | 0.5 |
| unknown protein location of EST emb F15151                                                                                                             | 264722_at    | 0.5 |
| putative K+ channel, beta subunit similar to GB:AAA87294;supported by full-length cDNA: Ceres:23300.                                                   | 264607_at    | 0.5 |
| putative heat-shock protein similar to GB:AAD39315;supported by full-length cDNA: Ceres:37036.                                                         | 264464_at    | 0.5 |
| putative phragmoplastin similar to dynamin-like protein phragmoplastin (gi 3341679); similar to ESTs gb W43823, gb N37665, gn R90466, gb T8840         | 264406_at    | 0.5 |
| hypothetical protein predicted by genemark.hmm                                                                                                         | 264427_at    | 0.5 |
| putative translation initiation factor eIF-2, gamma subunit similar to gb U37354 from S. pombe. ESTs gb T41979, gb N37284 and gb N37529 come fr        | 264327_at    | 0.5 |
| hypothetical protein contains non-consensus donor splice site AT at exon 4 and acceptor splice site at exon5;Contains similarity to serine/threonine p | 264331_at    | 0.5 |
| hypothetical protein similar to hypothetical protein GI:2894569 from [Arabidopsis thaliana]; supported by cDNA: gi_15028186_gb_AY045916.1_             | 264289_at    | 0.5 |
| replicase, putative similar to replicase GI:166841 from [Arabidopsis thaliana]; supported by cDNA: gi_15292902_gb_AY050885.1_                          | 264099_at    | 0.5 |
| unknown protein ;supported by full-length cDNA: Ceres:5167.                                                                                            | 263900_at    | 0.5 |
| putative s-adenosylmethionine synthetase ;supported by full-length cDNA: Ceres:13320.                                                                  | 263838_at    | 0.5 |
| putative indole-3-glycerol phosphate synthase ;supported by full-length cDNA: Ceres:3006.                                                              | 263807_at    | 0.5 |
| putative ATP-dependent RNA helicase                                                                                                                    | 263435_at    | 0.5 |
| putative PHD-type zinc finger protein                                                                                                                  | 263447_s_at  | 0.5 |
| putative histone H2B ;supported by full-length cDNA: Ceres:14965.                                                                                      | 263412_at    | 0.5 |
| putative ubiquitin-like protein ; supported by cDNA: gi_14334545_gb_AY035177.1_                                                                        | 263422_s_at  | 0.5 |
| unknown protein similar to ESTs gb T43206, gb H76501, gb AA651577, and gb AA605326;supported by full-length cDNA: Ceres:7488.                          | 263206_at    | 0.5 |
| transport protein, putative similar to transport protein GI:7268121 from (Arabidopsis thaliana); supported by cDNA: gi_15912296_gb_AY056426.1_         | 263185_at    | 0.5 |
| hypothetical protein Contains PF 00637 Clathrin 7-fold repeat. EST gb AA721862 comes from this gene                                                    | 263143_at    | 0.5 |
| hypothetical protein similar to hypothetical ABC transporter ATP-binding protein GI:9955395 from [Microcystis aeruginosa]                              | 263000_at    | 0.5 |
| unknown protein ;supported by full-length cDNA: Ceres:13758.                                                                                           | 262955_at    | 0.5 |
| sterol glucosyltransferase, putative similar to sterol glucosyltransferase GI:4731867 from [Dictyostelium discoideum]                                  | 262722_at    | 0.5 |
| putative ribulose-1,5 bisphosphate carboxylase/oxygenase large subunit N-methyltransferase highly similar to ribulose-1,5 bisphosphate carboxylas      | 262648_at    | 0.5 |
| unknown protein ; supported by cDNA: gi_15215593_gb_AY050325.1_                                                                                        | 262634_at    | 0.5 |
| oxidoreductase, putative contains Pfam profile: PF00671 Iron/Ascorbate oxidoreductase family; supported by cDNA: gi_13430545_gb_AF360185.1_            | 262637_at    | 0.5 |
| unknown protein Similar to gb AJ005073 Alix (ALG-2-interacting protein X) from Mus musculus. ESTs gb R90133, gb Z17944 and gb AA605465 con             | 262588_at    | 0.5 |
| hypothetical protein predicted by genemark.hmm;supported by full-length cDNA: Ceres:117456.                                                            | 262398_at    | 0.5 |
| unknown protein similar to unknown protein GB:AAC63676                                                                                                 | 262319_s_at  | 0.5 |
| asparaginyl-tRNA synthetase(SYNC1) protein,putative similar to SYNC1 protein GI:5670315 from [Arabidopsis thaliana]                                    | 262306_s_at  | 0.5 |
| unknown protein                                                                                                                                        | 262308_at    | 0.5 |
| alpha-xylosidase precursor identical to alpha-xylosidase precursor GB:AAD05539 GI:4163997 from [Arabidopsis thaliana]; supported by cDNA: gi_14        | 262230_at    | 0.5 |
| unknown protein ; supported by cDNA: gi_6520226_dbj_AB028230.1_AB028230                                                                                | 262079_at    | 0.5 |
| unknown protein ;supported by full-length cDNA: Ceres:37300.                                                                                           | 261900_at    | 0.5 |
| hypothetical protein predicted by genemark.hmm;supported by full-length cDNA: Ceres:93534.                                                             | 261787_at    | 0.5 |
| non-phototropic hypocotyl, putative similar to non-phototropic hypocotyl 3 GB:AAF05914 GI:6224712 from [Arabidopsis thaliana]                          | 261796_at    | 0.5 |
| calreticulin, putative similar to calreticulin GB:AAC49697 GI:2052383 from [Arabidopsis thaliana]; supported by cDNA: gi_2052382_gb_U66345.1_A         | 261692_at    | 0.5 |
| unknown protein ;supported by full-length cDNA: Ceres:33310.                                                                                           | 261677_at    | 0.5 |
| hypothetical protein predicted by genemark.hmm                                                                                                         | 261622_at    | 0.5 |
| ribosomal protein L9, putative similar to RIBOSOMAL PROTEIN L9 GB:P49209 from [Arabidopsis thaliana]                                                   | 261620_s_at  | 0.5 |



phytochrome kinase substrate 1, putative similar to phytochrome kinase substrate 1 GI:5020168 from [Arabidopsis thaliana];supported by full-length calcium-dependent protein kinase, putative similar to calcium-dependent protein kinase GI:604880 from [Arabidopsis thaliana]; supported by cDNA: unknown protein 261480\_at 0.5  
261378\_at 0.5  
261258\_at 0.5  
NAM protein, putative similar to NAM protein GI:6066594 from [Petunia hybrida]; supported by cDNA: gi\_14334571\_gb\_AY034959.1\_ transcription factor IIA large subunit similar to GB:CAA11525 from [Arabidopsis thaliana];supported by full-length cDNA: Ceres:19512. 261192\_at 0.5  
261079\_s\_at 0.5  
transcriptional activator RF2a, putative similar to transcriptional activator RF2a GB:AF005492 GI:2253277 from [Oryza sativa];supported by full-length acyl-CoA oxidase ACX3 identical to acyl-CoA oxidase ACX3 GI:8163758 from [Arabidopsis thaliana] 260953\_at 0.5  
260789\_s\_at 0.5  
RING-H2 finger protein RHA3a, putative similar to RING-H2 finger protein RHA3a GI:3790573 from [Arabidopsis thaliana]; supported by cDNA: gi\_1 unknown protein contains similarity to nucleolin GI:2290203 from [Hordeum vulgare]; supported by cDNA: gi\_13430539\_gb\_AF360182.1\_AF360182 260770\_at 0.5  
260772\_at 0.5  
polygalacturonase PG1, putative similar to GB:AAD46483 from [Glycine max] (Mol. Plant Microbe Interact. 12 (6), 490-498 (1999)); supported by cD unknown protein 260727\_at 0.5  
260595\_at 0.5  
putative glucosyltransferase ;supported by full-length cDNA: Ceres:34407. 260567\_at 0.5  
putative salt-inducible protein 260523\_at 0.5  
Expressed protein ; supported by cDNA: gi\_13605678\_gb\_AF361820.1\_AF361820 260500\_at 0.5  
Ser/Thr kinase ;supported by full-length cDNA: Ceres:100245. 260480\_at 0.5  
260401\_at 0.5  
unknown protein similar to hypothetical protein GB:CAA10289 [Cicer arietinum] 260387\_at 0.5  
putative flavonol sulfotransferase similar to flavonol 4 -sulfotransferase GB:P52837 from [Flaveria chloraefolia];supported by full-length cDNA: Ceres: Expressed protein ; supported by full-length cDNA: Ceres: 16467. 260352\_at 0.5  
260274\_at 0.5  
putative glycerol kinase similar to GLYCEROL KINASE GB:O69664 from (Mycobacterium tuberculosis) 260232\_at 0.5  
unknown protein contains Pfam profile: PF00561 alpha/beta hydrolase fold;supported by full-length cDNA: Ceres:36063. 260219\_at 0.5  
putative protein kinase Pfam HMM hit: Eukaryotic protein kinase domain; C-term region is similar to C-term region of chicken protein kinase PITSLR putative histidinol-phosphate aminotransferase similar to histidinol-phosphate aminotransferase GB:CAA70403 from [Nicotiana tabacum] 260172\_s\_at 0.5  
calmodulin-4 identical to GB:Q03510 from [Arabidopsis thaliana] (Plant Mol. Biol. 22 (2), 215-225 (1993)); supported by full-length cDNA: Ceres: 69E unknown protein 260138\_at 0.5  
260069\_at 0.5  
putative MAP kinase similar to mitogen-activated protein kinase GB:A56042 [Dictyostelium discoideum]; contains Pfam profile: PF00069 Eukaryotic ; unknown protein ;supported by full-length cDNA: Ceres:270659. 260045\_at 0.5  
260025\_at 0.5  
cell division control protein, putative similar to SP:P40986 from [Saccharomyces cerevisiae] 259960\_at 0.5  
putative casein kinase I similar to casein kinase I GB:CAA55395 [Arabidopsis thaliana]; supported by cDNA: gi\_16648960\_gb\_AY059850.1\_ unknown protein contains similarity to cytochrome oxidase I GI:1289267 from [Xantholius sp.];supported by full-length cDNA: Ceres:6875. 259865\_at 0.5  
259594\_at 0.5  
unknown protein ;supported by full-length cDNA: Ceres:37735. 259475\_at 0.5  
unknown protein similar to putative dehydrogenase GI:1922246 from [Arabidopsis thaliana]; supported by cDNA: gi\_15408534\_dbj\_AB032060.1\_AB unknown protein similar to unknown protein GB:AAC42254 [Arabidopsis thaliana] 259438\_at 0.5  
259335\_s\_at 0.5  
unknown protein 259302\_at 0.5  
putative ribulose-1,5-bisphosphate carboxylase/oxygenase small subunit N-methyltransferase I similar to ribulose-1,5-bisphosphate carboxylase/oxy RNA helicase, DRH1 identical to RNA helicase DRH1 GB:BAA28347 [Arabidopsis thaliana]; supported by cDNA: gi\_15215693\_gb\_AY050375.1\_ 259258\_at 0.5  
259194\_at 0.5  
transport protein SEC13, putative similar to protein transport protein SEC13 GB:P53024 [Pichia pastoris];supported by full-length cDNA: Ceres:3733 hypothetical protein predicted by genscan 259119\_at 0.5  
259060\_at 0.5  
unknown protein similar to unknown protein GB:BAA83351 [Oryza sativa]; supported by cDNA: gi\_14334835\_gb\_AY035091.1\_ 258992\_at 0.5  
258994\_at 0.5  
unknown protein similar to putative guanine nucleotide binding protein GB:CAB08769 [Schizosaccharomyces pombe]; supported by cDNA: gi\_16648 unknown protein contains Pfam profile: PF00514 armadillo/beta-catenin-like repeats (4 copies);supported by full-length cDNA: Ceres:34582. 258954\_at 0.5  
unknown protein similar to putative Anion exchanger family members: GB:AAD39673, GB:AAD55295 [Arabidopsis thaliana] 258913\_at 0.5  
Mutator-like transposase similar to MURA transposase of maize Mutator transposon 258789\_at 0.5  
putative Ras-like GTP-binding protein contains Pfam profile: PF00071 Ras family;supported by full-length cDNA: Ceres:10506. 258656\_at 0.5  
putative myo-inositol monophosphatase similar to myo-inositol-1(or 4)-monophosphatase 3 (IMP 3) GB:P54928 [Lycopersicon esculentum];supported disease resistance gene (RPM1) identical to disease resistance gene (RPM1) GB:X87851 [Arabidopsis thaliana] 258613\_at 0.5  
258544\_at 0.5  
galactose kinase identical to GB:AAB94084 from [Arabidopsis thaliana] (Plant Mol. Biol. (1999) 39 (5), 1003-1012); supported by cDNA: gi\_2736185 258517\_at 0.5  
putative tyrosyl-tRNA synthetase similar to TYROSYL-TRNA SYNTHETASE GB:P04077 from [Bacillus caldotenax] 258475\_at 0.5  
unknown protein 258448\_at 0.5  
20S proteasome subunit PAE2 identical to 20S proteasome subunit PAE2 GB:AAC32061 from [Arabidopsis thaliana]; supported by cDNA: gi\_34210 258373\_at 0.5  
hypothetical protein predicted by genemark 258317\_at 0.5  
hypothetical protein predicted by genemark 258292\_at 0.5  
unknown protein ; supported by cDNA: gi\_14334929\_gb\_AY035138.1\_ 258298\_at 0.5  
unknown protein similar to serine/threonine kinase receptor associated protein GB:NP\_035629 [Mus musculus], unr-interacting protein GB:NP\_0091 putative acetyltransferase similar to dihydroliipoamide S-acetyltransferase GB:AAD46491 from [Zea mays]; supported by cDNA: gi\_13605806\_gb\_AF aldose 1-epimerase, putative similar to ALDOSE 1-EPIMERASE PRECURSOR GB:P05149 from [Acinetobacter calcoaceticus]; supported by cDNA 258208\_at 0.5  
258163\_at 0.5  
integral membrane protein, putative contains Pfam profile: PF01554 uncharacterized membrane protein family 258179\_at 0.5  
hypothetical protein contains Pfam profile: PF01535 domain of unknown function (4 copies) 258149\_at 0.5  
Expressed protein ; supported by full-length cDNA: Ceres: 12996. 258041\_at 0.5  
hypothetical protein predicted by genscan+;supported by full-length cDNA: Ceres:108820. 257985\_at 0.5  
Expressed protein ; supported by full-length cDNA: Ceres: 32454. 257659\_at 0.5  
hypothetical protein 257641\_s\_at 0.5  
S-adenosyl-L-homocysteinas, putative similar to S-adenosyl-L-homocysteinease GB:AAD56048 from [Lupinus luteus]; supported by cDNA: gi\_15292 putative protein phosphatase type 2C similar to protein phosphatase type 2C GB:AAD17805 from [Lotus japonicus] 257173\_at 0.5  
257050\_at 0.5  
fucosyltransferase, putative similar to Fuct c3 protein GB:CAB52254 from [Vigna radiata] (J. Biol. Chem. (1999) 274 (31), 21830-21839) 257031\_at 0.5  
unknown protein similar to auxin-independent growth promoter GB: A44226 [Nicotiana tabacum];supported by full-length cDNA: Ceres:36984. 256879\_at 0.5  
pyruvate kinase, putative similar to pyruvate kinase isozyme A, chloroplast precursor GB:Q43117 [Ricinus communis];supported by full-length cDNA multispanning membrane protein, putative similar to transmembrane 9 superfamily member 2 GB:NP\_004791 from [Homo sapiens] (Gene 216 (199 hypothetical protein contains similarity to transporter proteins; supported by cDNA: gi\_15810468\_gb\_AY056273.1\_ 256836\_at 0.5  
256776\_at 0.5  
256650\_at 0.5  
hypothetical protein similar to putative acyl-CoA:1-acylglycerol-3-phosphate acyltransferase GB:AAF21074 from [Arabidopsis thaliana] 256652\_at 0.5  
unknown protein supported by full-length cDNA: Ceres:42677. 256543\_at 0.5  
oxidoreductase, putative contains Pfam profile: PF01408: oxidoreductase, Gfo/Ihd/MocA family 256514\_at 0.5  
unknown protein 256489\_at 0.5  
pheromone receptor, putative (AR401) identical to AR401 [Arabidopsis thaliana] GI:1669601;supported by full-length cDNA: Ceres:3969. 256380\_at 0.5  
GTPase, putative contains Pfam profile: PF01926 GTPase of unknown function 256274\_at 0.5  
omega-6 fatty acid desaturase, endoplasmic reticulum (FAD2) identical to omega-6 fatty acid desaturase, endoplasmic reticulum (FAD2) SP:P4631; betaine aldehyde dehydrogenase, putative similar to betaine aldehyde dehydrogenase (BADH) GI:1813537 [Spinacia oleracea] 256277\_at 0.5  
256246\_at 0.5  
zinc finger protein, putative similar to zinc finger protein GI:8843731 from [Arabidopsis thaliana] 256149\_at 0.5  
aminoalcoholphosphotransferase identical to aminoalcoholphosphotransferase GI:3661593 from [Arabidopsis thaliana]; supported by cDNA: gi\_3661 hypothetical protein predicted by genscan+; supported by cDNA: gi\_15810574\_gb\_AY056326.1\_ 256134\_at 0.5  
256069\_at 0.5  
hypothetical protein contains Pfam profile: PF01084 ribosomal protein S18 256043\_at 0.5  
unknown protein contains similarity to alternative NADH-dehydrogenase GI:3718005 from [Yarrowia lipolytica];supported by full-length cDNA: Ceres: unknown protein 256057\_at 0.5  
255963\_at 0.5  
unknown protein 255928\_at 0.5  
putative pseudouridine synthase 255864\_at 0.5  
hypothetical protein similar to putative phloem transcription factor GI:7630279 from [Apium graveolens] 255725\_at 0.5  
hypothetical protein 255640\_at 0.5  
putative protein similar to nucleolin protein; supported by cDNA: gi\_13605915\_gb\_AF367357.1\_AF367357 255598\_at 0.5

predicted protein of unknown function similar to M. truncatula MtN21, GenBank accession number Y15293; F11O4.14 was picked up in a screen for 255578\_at 0.5  
 predicted OR23 protein of unknown function 255469\_at 0.5  
 score=37.6, E=2.9e-07, N=3 255194\_at 0.5  
 putative alpha NAC stong similarity to Nascent polypeptide associated complex alpha chain - human, PIR2:S49326; supported by cDNA: gi\_150279 254981\_at 0.5  
 predicted protein of unknown function 254936\_at 0.5  
 ACC synthase (ATACS-6) ; supported by cDNA: gi\_16226285\_gb\_AF428292.1\_AF428292 254926\_at 0.5  
 putative transport protein Na(+) dependent transporter (Sbf family) - Aquifex aeolicus, PIR2:E70482; supported by cDNA: gi\_15215838\_gb\_AY0504 254862\_at 0.5  
 hydrolase-like protein 2-hydroxy-6-oxohepta-2,4-dienoate hydrolase (EC 3.7.-.-) - Synechocystis sp., PIR2:S77427; supported by full-length cDNA: C 254783\_at 0.5  
 putative protein several hypothetical proteins - Arabidopsis thaliana 254800\_at 0.5  
 putative protein predicted protein, Arabidopsis thaliana; supported by cDNA: gi\_14326542\_gb\_AF385725.1\_AF385725 254704\_at 0.5  
 DAG-like protein DAG precursor, Antirrhinum majus, MNOS:S71747 254493\_at 0.5  
 peroxidase prxr1 ;supported by full-length cDNA: Ceres:20758. 254386\_at 0.5  
 putative protein various predicted proteins, Arabidopsis thaliana 254320\_at 0.5  
 calcium-dependent protein kinase (CDPK6) ;supported by full-length cDNA: Ceres:37278. 254224\_at 0.5  
 ubiquitin activating enzyme - like protein ubiquitin activating enzyme, Lycopersicon esculentum, gb:AJ011418;supported by full-length cDNA: Ceres: 254084\_at 0.5  
 glutamine cyclotransferase precursor - like protein glutamine cyclotransferase precursor, Carica papaya, AF061240;supported by full-length cDNA: ( 254082\_at 0.5  
 hypothetical protein ; supported by cDNA: gi\_14517537\_gb\_AY039604.1\_ 254050\_s\_at 0.5  
 arginyl-tRNA synthetase 254004\_at 0.5  
 putative uracil phosphoribosyl transferase uracil phosphoribosyl transferase,Saccharomyces cerevisiae, PIR2:JH0147supported by full-length cDNA 253970\_at 0.5  
 putative protein ENOD20 gene, Medicago truncatula, X99467;supported by full-length cDNA: Ceres:33380. 253875\_at 0.5  
 putative acyl-CoA binding protein strong similarity to acyl-CoA binding protein - Arabidopsis thaliana, PID:g4128197;supported by full-length cDNA: C 253840\_at 0.5  
 receptor-like protein kinase 5 precursor (RLK5) ; supported by cDNA: gi\_166849\_gb\_M84660.1\_ATHRLPKC 253779\_at 0.5  
 putative protein predicted proteins, Arabidopsis thaliana 253686\_at 0.5  
 threonine synthase 253700\_at 0.5  
 putative protein 253577\_at 0.5  
 Expressed protein ; supported by full-length cDNA: Ceres: 37878. 253548\_at 0.5  
 putative protein Fidiipidine, Drosophila melanogaster, gb:AJ011928; supported by cDNA: gi\_14334641\_gb\_AY034994.1\_ 253441\_at 0.5  
 protein kinase AME3 ; supported by cDNA: gi\_642133\_dbj\_D45355.1\_ATHPKAME3C 253395\_at 0.5  
 Tic22 -like protein strong homology to Tic22 -Pisum sativum, PID:g3769671 253381\_at 0.5  
 hypothetical protein ; supported by cDNA: gi\_16604594\_gb\_AY059742.1\_ 253310\_at 0.5  
 Phosphoglycerate dehydrogenase - like protein Phosphoglycerate dehydrogenase, Arabidopsis thaliana, PATCHX:D1021238;supported by full-leng 253274\_at 0.5  
 subtilisin-like serine protease similar to SBT1, a subtilase from tomato plants GI:1771160 from [Lycopersicon esculentum] 253218\_at 0.5  
 putative protein phospholipase C, Listeria monocytogenes, PIR:A37204;supported by full-length cDNA: Ceres:4284. 253220\_s\_at 0.5  
 putative protein protein kinase APK1, Arabidopsis thaliana, PIR2:S28615; supported by cDNA: gi\_16612248\_gb\_AF439824.1\_AF439824 253184\_at 0.5  
 putative protein protein kinase 6, Glycine max, PIR2:S29851 253158\_at 0.5  
 putative protein predicted protein, Synechocystis sp., PIR2:S75747;supported by full-length cDNA: Ceres:42841. 253160\_at 0.5  
 homeodomain - like protein several homeodomain transcription factors; supported by cDNA: gi\_15081750\_gb\_AY048268.1\_ 253131\_at 0.5  
 putative protein CRP1, Zea mays, gb:AF073522;supported by full-length cDNA: Ceres:5482. 253116\_at 0.5  
 aldehyde dehydrogenase like protein aldehyde dehydrogenase (NAD+) (EC 1.2.1.3) 4, microsomal, rat, PIR2:A41028 253083\_at 0.5  
 putative protein beta-ketoadipate enol-lactone hydrolase, Acinetobacter sp., L05770; supported by cDNA: gi\_15810302\_gb\_AY056190.1\_ 253053\_at 0.5  
 putative protein various predicted proteins 253071\_at 0.5  
 putative protein permease 1 - Mesembryanthemum crystallinum,PID:g3202040 253021\_at 0.5  
 ES43 like protein ES43 protein - barley, PIR2:S44281;supported by full-length cDNA: Ceres:8278. 252925\_at 0.5  
 putative protein 252909\_at 0.5  
 GTP-binding - like protein GTP-binding protein DRG, Xenopus laevis, SWISS-PROT:P43690; supported by cDNA: gi\_14334721\_gb\_AY035034.1\_ 252883\_at 0.5  
 putative transposase hypothetical protein a, maize transposable element Ac - Zea mays, PIR:T02916 252847\_at 0.5  
 putative protein 252344\_s\_at 0.5  
 putative protein APRIL protein, Homo sapiens, EMBL:HSAPRIL\_1 252174\_at 0.5  
 GDP-D-mannose-4,6-dehydratase (MUR1) ;supported by full-length cDNA: Ceres:11217. 252121\_at 0.5  
 mucin -like protein hemomucin, Drosophila melanogaster, EMBL:DM42014;supported by full-length cDNA: Ceres:34197. 252117\_at 0.5  
 putative protein hin1 protein -Nicotiana tabacum,PID:e259431;supported by full-length cDNA: Ceres:92178. 252058\_at 0.5  
 hypothetical protein KIAA0253 protein, Homo saoiens, SWISSPROT:Y253\_HUMAN 252062\_at 0.5  
 beta-galactosidase precursor - like protein beta-galactosidase precursor, Carica papaya, EMBL:AF064786; supported by cDNA: gi\_13605856\_gb\_A 251996\_at 0.5  
 nodulin / glutamate-ammonia ligase - like protein MtN6 - nodulin 6, Medicago truncatula, EMBL:MET133118 251973\_at 0.5  
 putative protein KIAA0544 protein, Homo sapiens, EMBL:AB011116;supported by full-length cDNA: Ceres:110247. 251959\_at 0.5  
 synaptobrevin -like protein vesicle-associated membrane protein 7B (At VAMP7B), Arabidopsis thaliana, EMBL:AF025333 251877\_at 0.5  
 DNA-binding protein-like DNA-binding protein 4 WRKY4 - Nicotiana tabacum, EMBL:AF193771;supported by full-length cDNA: Ceres:34847. 251705\_at 0.5  
 putative protein MULTICOPY SUPPRESSOR OF RAS1 - Schizosaccharomyces pombe, EMBL:D78582;supported by full-length cDNA: Ceres:4015 251657\_at 0.5  
 dnaJ-like protein DNAJ protein - Schizosaccharomyces pombe, PIR:T39697;supported by full-length cDNA: Ceres:120719. 251622\_at 0.5  
 1-acylcerol-3-phosphate acyltransferase - like protein 1-acylcerol-3-phosphate acyltransferase, Brassica napus, Z49860;supported by full-length cDI 251596\_at 0.5  
 putative protein F-box protein Fbl2 - Homo sapiens, EMBL:AF174589;supported by full-length cDNA: Ceres:35534. 251532\_at 0.5  
 putative protein mitochondrial RNA splicing protein MRS2 - Saccharomyces cerevisiae, PIR:S62064; supported by cDNA: gi\_16209701\_gb\_AY0576 251508\_at 0.5  
 Rab GDP dissociation inhibitor ; supported by cDNA: gi\_2446980\_dbj\_AB005560.1\_AB005560 251449\_at 0.5  
 transketolase - like protein transketolase, Solanum tuberosum, EMBL:Z50099;supported by full-length cDNA: Ceres:15659. 251396\_at 0.5  
 putative protein hypothetical protein At2g45740 - Arabidopsis thaliana, EMBL:AC004665 251352\_at 0.5  
 putative protein alkB protein - Escherichia coli, PIR:BVECKB 251057\_at 0.5  
 disease resistance - like protein rpp8, Arabidopsis thaliana, EMBL:AF089711; supported by cDNA: gi\_15292720\_gb\_AY050794.1\_ 250829\_at 0.5  
 short chain alcohol dehydrogenase-like ; supported by full-length cDNA: Ceres:114427. 250763\_at 0.5  
 peptide methionine sulfoxide reductase (msr) ; supported by full-length cDNA: Ceres: 31014. 250609\_at 0.5  
 putative protein predicted proteins, Arabidopsis thaliana, Schizosaccharomyces pombe and Drosophila melanogaster; supported by full-length cDN/ 250497\_at 0.5  
 putative protein HSPC184, Homo sapiens, EMBL:AF151018; supported by cDNA: gi\_14335059\_gb\_AY037209.1\_ 250401\_at 0.5  
 tubulin beta-6 chain (sp)P29514) ; supported by cDNA: gi\_13430695\_gb\_AF360260.1\_AF360260 250317\_at 0.5  
 callose synthase catalytic subunit -like protein putative callose synthase catalytic subunit (CFL1), Gossypium hirsutum, EMBL:AF085717 250272\_at 0.5  
 myb-related protein - like myb-related protein 1, garden petunia, PIR:S26605 250167\_at 0.5  
 unknown protein ; supported by cDNA: gi\_14423559\_gb\_AF387017.1\_AF387017 250131\_at 0.5  
 galactose-1-phosphate uridylyl transferase-like protein ;supported by full-length cDNA: Ceres:34699. 250029\_at 0.5  
 Glucose-1-phosphate adenyllyltransferase (ApL1/adg2) ; supported by cDNA: gi\_2149020\_gb\_U72290.1\_ATU72290 249927\_at 0.5  
 putative protein similar to unknown protein (ref|NP\_015265.1); supported by cDNA: gi\_12007446\_gb\_AF322255.1\_AF322255 249864\_at 0.5  
 cation-transporting ATPase 249846\_at 0.5  
 thaumatin-like protein 249748\_at 0.5  
 putative protein similar to unknown protein (gb|AAD55417.1) 249723\_at 0.5  
 putative protein similar to unknown protein (emb|CAB80933.1) 249347\_at 0.5  
 brain and reproductive organ-expressed protein-like 249192\_at 0.5  
 major surface glycoprotein-like ; supported by cDNA: gi\_13430719\_gb\_AF360272.1\_AF360272 249209\_at 0.5  
 putative protein similar to unknown protein (gb|AAC80623.1) 249172\_at 0.5  
 actin-like protein ; supported by cDNA: gi\_15982920\_gb\_AY057568.1\_ 249127\_at 0.5  
 putative protein contains similarity to kinase 248850\_at 0.5

|                                                                                                                                                         |           |     |
|---------------------------------------------------------------------------------------------------------------------------------------------------------|-----------|-----|
| putative protein contains similarity to unknown protein (dbj BAA90946.1)                                                                                | 248601_at | 0.5 |
| putative protein strong similarity to unknown protein (pir T09896); supported by cDNA: gi_14334595_gb_AY034971.1_                                       | 248530_at | 0.5 |
| protein kinase ATN1-like protein                                                                                                                        | 248541_at | 0.5 |
| putative protein similar to unknown protein (pir T31651);supported by full-length cDNA: Ceres:32353.                                                    | 248492_at | 0.5 |
| potassium/proton antiporter-like protein ;supported by full-length cDNA: Ceres:118693.                                                                  | 248375_at | 0.5 |
| putative protein similar to unknown protein (pir C69291)                                                                                                | 248391_at | 0.5 |
| putative protein contains similarity to acyl-CoA binding protein;supported by full-length cDNA: Ceres:35856.                                            | 248269_at | 0.5 |
| putative protein contains similarity to unknown protein (gb AAC64884.1)                                                                                 | 248124_at | 0.5 |
| DNA topoisomerase I (sp P30181)                                                                                                                         | 248099_at | 0.5 |
| putative protein contains similarity to NRK-related kinase                                                                                              | 248060_at | 0.5 |
| Expressed protein ; supported by full-length cDNA: Ceres: 92808.                                                                                        | 248002_at | 0.5 |
| histone acetyltransferase HAT B                                                                                                                         | 247972_at | 0.5 |
| putative PRL1 associated protein ;supported by full-length cDNA: Ceres:150336.                                                                          | 247790_at | 0.5 |
| putative protein similar to unknown protein (sp Q42463)                                                                                                 | 247453_at | 0.5 |
| putative protein strong similarity to unknown protein (gb AAD55296.1)                                                                                   | 247429_at | 0.5 |
| putative protein hypersensitive-induced response protein HIR3, Zea mays, EMBL:AF236375;supported by full-length cDNA: Ceres:2641.                       | 247403_at | 0.5 |
| beta-galactosidase (emb CAB64742.1) ; supported by cDNA: gi_16649044_gb_AY059892.1_                                                                     | 247356_at | 0.5 |
| putative protein contains similarity to unknown protein (gb AAF44992.1); supported by cDNA: gi_15028246_gb_AY046038.1_                                  | 247256_at | 0.5 |
| putative protein strong similarity to unknown protein (pir T05573)                                                                                      | 247183_at | 0.5 |
| unknown protein                                                                                                                                         | 247166_at | 0.5 |
| unknown protein                                                                                                                                         | 247112_at | 0.5 |
| calcium-dependent protein kinase ;supported by full-length cDNA: Ceres:18901.                                                                           | 247137_at | 0.5 |
| dolichyl-di-phosphooligosaccharide-protein glycotransferase (oligosaccharyltransferase)-like ;supported by full-length cDNA: Ceres:18419.               | 247058_at | 0.5 |
| putative protein similar to unknown protein (gb AAD25674.1)                                                                                             | 246958_at | 0.5 |
| putative protein                                                                                                                                        | 246846_at | 0.5 |
| putative protein many predicted proteins, Arabidopsis thaliana                                                                                          | 246808_at | 0.5 |
| voltage-dependent anion-selective channel protein hsr2 ;supported by full-length cDNA: Ceres:1417.                                                      | 246546_at | 0.5 |
| putative protein hypothetical proteins - Arabidopsis thaliana                                                                                           | 246497_at | 0.5 |
| putative protein putative N-acetyltransferase F13E7.7 - Arabidopsis thaliana, EMBL:AC018363                                                             | 246448_at | 0.5 |
| hypothetical protein                                                                                                                                    | 246449_at | 0.5 |
| hypothetical protein contains similarity to cytochrome oxidase subunit GI:440282 from [Ceratoglyphina styracicola]                                      | 246404_at | 0.5 |
| unknown protein contains similarity to beta-1,4 mannosyltransferase GI:6970470 from [Homo sapiens]                                                      | 246351_at | 0.5 |
| receptor-like serine/threonine kinase, putative similar to receptor-like serine/threonine kinase GI:2465923 from [Arabidopsis thaliana]; supported by c | 246327_at | 0.5 |
| putative protein serine kinase SRPK2, Homo sapiens, EMBL:AC005070                                                                                       | 246334_at | 0.5 |
| putative transmembrane protein G5p yeast Sac1 protein, PIR:A33622                                                                                       | 246300_at | 0.5 |
| putative protein predicted proteins, Arabidopsis thaliana; supported by cDNA: gi_15810384_gb_AY056231.1_                                                | 245972_at | 0.5 |
| Pto kinase interactor, putative similar to Pto kinase interactor 1 GI:3668069 from [Lycopersicon esculentum]                                            | 245845_at | 0.5 |
| hypothetical protein contains similarity to cyc1A protein GI:6358548 from [Antirrhinum graniticum]; supported by cDNA: gi_14334669_gb_AY035008.         | 245774_at | 0.5 |
| amino acid permease, putative almost identical to amino acid permease GI:608673 from [Arabidopsis thaliana]                                             | 245740_at | 0.5 |
| Expressed protein ; supported by cDNA: gi_15912292_gb_AY056424.1_                                                                                       | 245716_at | 0.5 |
| alkaline/neutral invertase, putative similar to alkaline/neutral invertase GI:9758657 from [Arabidopsis thaliana]                                       | 245681_at | 0.5 |
| transport protein                                                                                                                                       | 245625_at | 0.5 |
| phosphatase like protein                                                                                                                                | 245557_at | 0.5 |
| putative protein                                                                                                                                        | 245492_at | 0.5 |
| Expressed protein ; supported by cDNA: gi_14334421_gb_AY034902.1_                                                                                       | 245280_at | 0.5 |
| Expressed protein ; supported by cDNA: gi_15215826_gb_AY050443.1_                                                                                       | 245289_at | 0.5 |
| hypothetical protein ; supported by cDNA: gi_15810232_gb_AY056155.1_                                                                                    | 245265_at | 0.5 |
| Expressed protein non-consensus GG donor splice site at exon 1 and 6; CT acceptor splice site at exon 2; supported by cDNA: gi:13605660                 | 245216_at | 0.5 |
| PSI P700 apoprotein A2                                                                                                                                  | 245006_at | 0.5 |
| putative ser/thr protein kinase similar to GB:AAD21713                                                                                                  | 264549_at | 0.5 |

**Table 4: Transcripts suppressed during a combination of drought stress and heat shock compared to unstressed plants**

|                                                                                                                                                       | <b>Affimetrix<br/>number</b> | <b>log<sub>2</sub> fold<br/>suppressed</b> |
|-------------------------------------------------------------------------------------------------------------------------------------------------------|------------------------------|--------------------------------------------|
| unknown protein                                                                                                                                       | 262832_s_at                  | -8                                         |
| putative auxin-induced protein auxin-induced protein 10A, Glycine max., PIR2:JQ1099                                                                   | 252965_at                    | -7.9                                       |
| antifungal protein-like (PDF1.2)                                                                                                                      | 249052_at                    | -7.8                                       |
| Expressed protein ; supported by full-length cDNA: Ceres: 7152.                                                                                       | 266658_at                    | -7.7                                       |
| putative lectin similar to lectin SP:P02874 [Onobrychis vicifolia]; contains Pfam profile: PF00139 legume lectins beta domain; supported by cDNA: c   | 257206_at                    | -7.4                                       |
| putative protein predicted proteins, Arabidopsis thaliana                                                                                             | 247474_at                    | -6.7                                       |
| putative protein basic leucine zipper transcription activator shoot-forming PKSF1 - Paulownia kawakamii, EMBL:AF046934;supported by full-length       | 251575_at                    | -6.5                                       |
| hypothetical protein predicted by genemark.hmm                                                                                                        | 261684_at                    | -6.4                                       |
| thaumatin-like protein similar to thaumatin GB:AAD55090 [Vitis riparia]; contains Pfam profile: PF00314 Thaumatin family; supported by cDNA: gi_1     | 259925_at                    | -6.3                                       |
| unknown protein                                                                                                                                       | 263549_at                    | -6.2                                       |
| unknown protein ;supported by full-length cDNA: Ceres:15495.                                                                                          | 248889_at                    | -6.2                                       |
| hypothetical protein predicted by genefinder                                                                                                          | 266800_at                    | -6.1                                       |
| unknown protein ; supported by full-length cDNA: Ceres: 5171.                                                                                         | 264343_at                    | -6.1                                       |
| putative protein similar to unknown protein (emb)CAA71173.1)                                                                                          | 248322_at                    | -6.1                                       |
| putative gibberellin-regulated protein contains similarity to gibberellin-regulated protein 2 precursor (GAST1) homolog gb U11765 from A. thaliana    | 264195_at                    | -5.9                                       |
| hypothetical protein ;supported by full-length cDNA: Ceres:38891.                                                                                     | 266805_at                    | -5.6                                       |
| unknown protein similar to hypothetical protein GB:CAA10289 [Cicer arietinum]; supported by full-length cDNA: Ceres: 108086.                          | 259272_at                    | -5.5                                       |
| disease resistance RPP5 like protein (fragment)                                                                                                       | 245450_at                    | -5.5                                       |
| unknown protein                                                                                                                                       | 248190_at                    | -5.4                                       |
| unknown protein                                                                                                                                       | 265837_at                    | -5.2                                       |
| putative protein auxin-induced protein 6B, mung bean, PIR:T10942                                                                                      | 251977_at                    | -5.2                                       |
| unknown protein ;supported by full-length cDNA: Ceres:4309.                                                                                           | 248062_at                    | -5.2                                       |
| hevein-like protein precursor (PR-4) identical to hevein-like protein precursor GB:P43082 [Arabidopsis thaliana], similar to wound-induced protein (I | 258791_at                    | -5.1                                       |
| putative protein                                                                                                                                      | 250942_at                    | -5.1                                       |
| response regulator 6 (ARR6) ; supported by cDNA: gi_3953600_dbj_AB008489.1_AB008489                                                                   | 247406_at                    | -5.1                                       |
| expansin (At-EXP1) identical to expansin (At-EXP1) [Arabidopsis thaliana] GI:1041702;supported by full-length cDNA: Ceres:255048.                     | 256299_at                    | -5                                         |
| putative expansin ;supported by full-length cDNA: Ceres:27553.                                                                                        | 255822_at                    | -5                                         |
| glutathione S-transferase, putative similar to glutathione S-transferase GI:860955 from [Hyoscyamus muticus]; supported by cDNA: gi_15215607_         | 262119_s_at                  | -4.9                                       |
| thionin, putative similar to thionin [Arabidopsis thaliana] GI:1181533; supported by cDNA: gi_14190504_gb_AF380652.1_AF380652                         | 256527_at                    | -4.9                                       |
| putative protein                                                                                                                                      | 251003_at                    | -4.9                                       |
| hypothetical protein similar to putative glucosyltransferase GB:AAD15455 GI:4263795 from (Arabidopsis thaliana)                                       | 265175_at                    | -4.8                                       |
| unknown protein                                                                                                                                       | 263565_at                    | -4.8                                       |
| myrosinase-associated protein, putative similar to myrosinase-associated protein GI:1769967 from [Brassica napus]; supported by cDNA: gi_15800        | 263161_at                    | -4.8                                       |
| histone H2A.F/Z ;supported by full-length cDNA: Ceres:33085.                                                                                          | 251846_at                    | -4.8                                       |
| hypothetical protein ; supported by full-length cDNA: Ceres: 14577.                                                                                   | 256569_at                    | -4.7                                       |
| hypothetical protein                                                                                                                                  | 252345_at                    | -4.7                                       |
| serine/threonine-specific protein kinase - like putative protein serine /threonine kinase, Sorghum bicolor, EMBL:SBRLK1                               | 247684_at                    | -4.7                                       |
| putative alanine acetyl transferase                                                                                                                   | 265725_at                    | -4.6                                       |
| putative protein similar to unknown protein (pir) S72530);supported by full-length cDNA: Ceres:32925.                                                 | 248683_at                    | -4.6                                       |
| glutaredoxin, putative similar to glutaredoxin GB:CAA89699 GI:1732424 from [Ricinus communis];supported by full-length cDNA: Ceres:125679.            | 260831_at                    | -4.5                                       |
| unknown protein                                                                                                                                       | 258897_at                    | -4.5                                       |
| putative pectinesterase pectinesterase - Lycopersicon esculentum, PID:e312172                                                                         | 252989_at                    | -4.5                                       |
| hypothetical protein                                                                                                                                  | 252346_at                    | -4.5                                       |
| putative protein similar to unknown protein (emb)CAB53482.1)                                                                                          | 249167_at                    | -4.5                                       |
| putative pollen surface protein endosperm specific protein - Zea mays, PID:g2104712;supported by full-length cDNA: Ceres:4620.                        | 254785_at                    | -4.4                                       |
| putative protein auxin-regulated gene, Vigna radiata                                                                                                  | 253253_at                    | -4.4                                       |
| small auxin up RNA (SAUR-AC1) ;supported by full-length cDNA: Ceres:14973.                                                                            | 252970_at                    | -4.4                                       |
| putative protein DRT100 protein precursor, Arabidopsis thaliana, PIR:A46260;supported by full-length cDNA: Ceres:41409.                               | 250277_at                    | -4.4                                       |
| putative protein proline-rich protein APG, Arabidopsis thaliana, PIR:S21961                                                                           | 250043_at                    | -4.4                                       |
| putative protein predicted proteins, Arabidopsis thaliana                                                                                             | 249609_at                    | -4.4                                       |
| putative protein similar to unknown protein (gb)AAF63814.1);supported by full-length cDNA: Ceres:40718.                                               | 248623_at                    | -4.4                                       |
| calmodulin-like protein identical to GB:D45848; supported by cDNA: gi_15983405_gb_AF424577.1_AF424577                                                 | 267083_at                    | -4.3                                       |
| putative tyrosine aminotransferase ;supported by full-length cDNA: Ceres:14570.                                                                       | 263539_at                    | -4.3                                       |
| Expressed protein ; supported by full-length cDNA: Ceres: 27081.                                                                                      | 263182_at                    | -4.3                                       |
| putative auxin-induced protein similar to SAUR GB:BAA25434 [Raphanus sativus]                                                                         | 259331_at                    | -4.3                                       |

|                                                                                                                                                                     |             |      |
|---------------------------------------------------------------------------------------------------------------------------------------------------------------------|-------------|------|
| Expressed protein ; supported by full-length cDNA: Ceres: 41224.                                                                                                    | 255969_at   | -4.3 |
| unknown protein similarity to HSR201 protein, <i>Nicotiana tabacum</i> , gb:X95343; contains EST gb:R65039                                                          | 264403_at   | -4.2 |
| xyloglucan endo-transglycosylase-like protein ;supported by full-length cDNA: Ceres:12301.                                                                          | 247162_at   | -4.2 |
| putative auxin-regulated protein                                                                                                                                    | 264016_at   | -4.2 |
| hypothetical protein predicted by genefinder and genscan                                                                                                            | 260472_at   | -4.2 |
| putative two-component response regulator protein ; supported by cDNA: gi_11870067_gb_AF305721.1_AF305721                                                           | 266078_at   | -4.1 |
| putative DNA-binding protein (RAV2-like) identical to residues 34-352 of RAV2 GB:BAA34251 ( <i>Arabidopsis thaliana</i> );supported by full-length cDNA:            | 260037_at   | -4.1 |
| unknown protein identical to GB:AAD56318 ( <i>Arabidopsis thaliana</i> )                                                                                            | 259211_at   | -4.1 |
| putative protein predicted protein, <i>Arabidopsis thaliana</i>                                                                                                     | 249919_at   | -4.1 |
| putative protein predicted proteins from various species, Human, yeast, <i>Oryctolagus</i> sp.                                                                      | 247621_at   | -4.1 |
| putative glutathione S-transferase ;supported by full-length cDNA: Ceres:27915.; supported by cDNA: gi_11095995_gb_AF288181.1_AF288181                              | 266746_s_at | -4   |
| Expressed protein ; supported by full-length cDNA: Ceres: 10388.                                                                                                    | 264262_at   | -4   |
| histone H2A ; supported by full-length cDNA: Ceres: 8.                                                                                                              | 263264_at   | -4   |
| putative monodehydroascorbate reductase (NADH) similar to monodehydroascorbate reductase (NADH) GB:JU0182 [ <i>Cucumis sativus</i> ]; supported                     | 258941_at   | -4   |
| serine/threonine kinase - like protein serine/threonine kinase, <i>Brassica oleraceae</i>                                                                           | 254250_at   | -4   |
| ethylene responsive element binding factor-like protein (ATERF6) ; supported by cDNA: gi_3298497_dbj_AB013301.1_AB013301                                            | 245250_at   | -4   |
| putative antifungal protein                                                                                                                                         | 257365_x_at | -4   |
| hypothetical protein similar to putative MADS-box protein GI:4580382 from [ <i>Arabidopsis thaliana</i> ]                                                           | 262902_x_at | -3.9 |
| putative pectate lyase pectate lyase, <i>Musa acuminata</i> , PATX:E209876;supported by full-length cDNA: Ceres:36681.                                              | 254119_at   | -3.9 |
| putative protein                                                                                                                                                    | 252661_at   | -3.9 |
| vegetative storage protein-like ;supported by full-length cDNA: Ceres:27372.                                                                                        | 249073_at   | -3.9 |
| putative protein                                                                                                                                                    | 247754_at   | -3.9 |
| similar to latex allergen from <i>Hevea brasiliensis</i> ;supported by full-length cDNA: Ceres:1999.                                                                | 245038_at   | -3.9 |
| unknown protein                                                                                                                                                     | 265327_at   | -3.8 |
| Expressed protein ; supported by full-length cDNA: Ceres: 31015.                                                                                                    | 259479_at   | -3.8 |
| unknown protein ;supported by full-length cDNA: Ceres:4861.                                                                                                         | 258480_at   | -3.8 |
| unknown protein predicted by genscan+;supported by full-length cDNA: Ceres:153279.                                                                                  | 258468_at   | -3.8 |
| peroxidase ATP19a                                                                                                                                                   | 254914_at   | -3.8 |
| putative protein hypothetical protein - <i>Arabidopsis thaliana</i> ,PIR2:H71441;supported by full-length cDNA: Ceres:4642.                                         | 254746_at   | -3.8 |
| putative protein similar to unknown protein (gb AAD32884.1)                                                                                                         | 248123_at   | -3.8 |
| unknown protein ; supported by cDNA: gi_14517479_gb_AY039575.1_                                                                                                     | 266017_at   | -3.7 |
| Expressed protein ; supported by cDNA: gi_14335055_gb_AY037207.1_                                                                                                   | 256766_at   | -3.7 |
| putative protein similar to transcriptional regulator                                                                                                               | 255298_at   | -3.7 |
| putative protein DNA damage-inducible protein - <i>Synechocystis</i> sp.,PIR2:S77364                                                                                | 252921_at   | -3.7 |
| putative protein microtubule-associated protein homolog, <i>Drosophila melanogaster</i> , EMBL:T13564                                                               | 249378_at   | -3.7 |
| putative protein similar to unknown protein (pir T05752);supported by full-length cDNA: Ceres:109272.                                                               | 248164_at   | -3.7 |
| unknown protein                                                                                                                                                     | 245866_s_at | -3.7 |
| unknown protein location of ESTs est VBVD05, gb Z30807 and VBVD05 , gb Z30808;supported by full-length cDNA: Ceres:39763.                                           | 265066_at   | -3.6 |
| unknown protein similar to hypothetical protein GB:AAF27090 GI:6730669 from ( <i>Arabidopsis thaliana</i> );supported by full-length cDNA: Ceres:101864             | 262986_at   | -3.6 |
| unknown protein ;supported by full-length cDNA: Ceres:20378.                                                                                                        | 260527_at   | -3.6 |
| unknown protein ; supported by full-length cDNA: Ceres: 38378.                                                                                                      | 259664_at   | -3.6 |
| delta tonoplast integral protein (delta-TIP) identical to delta tonoplast integral protein (delta-TIP) GB:U39485 [ <i>Arabidopsis thaliana</i> ] (Plant Cell 8 (4), | 258054_at   | -3.6 |
| putative pectinacetyltransferase protein pectinacetyltransferase precursor, <i>Vigna radiata</i> , PIR2:S68805;supported by full-length cDNA: Ceres:34674.          | 254578_at   | -3.6 |
| putative protein small auxin up-regulated RNA, <i>Malus domestica</i> , gb:Z93766                                                                                   | 253207_at   | -3.6 |
| dUTP pyrophosphatase-like protein dUTP pyrophosphatase - <i>Lycopersicon esculentum</i> ,PIR2:JQ1599; supported by cDNA: gi_13878142_gb_AF37                        | 252442_at   | -3.6 |
| putative protein hypersensitivity-related hsr201 protein - <i>Nicotiana tabacum</i> ,PIR2:T03274                                                                    | 252317_at   | -3.6 |
| beta-1,3-glucanase                                                                                                                                                  | 251673_at   | -3.6 |
| thionin Thi2.2 ;supported by full-length cDNA: Ceres:1523.                                                                                                          | 249645_at   | -3.6 |
| calcium-binding protein - like cbp1 calcium-binding protein, <i>Lotus japonicus</i> , EMBL:LJA251808; supported by cDNA: gi_16648829_gb_AY058192.1                  | 249417_at   | -3.6 |
| histone H2A - like protein histone H2A, parsley, PIR:S11498;supported by full-length cDNA: Ceres:20036.                                                             | 247651_at   | -3.6 |
| F12A21.6 hypothetical protein                                                                                                                                       | 245193_at   | -3.6 |
| hypothetical protein predicted by genscan;supported by full-length cDNA: Ceres:10798.                                                                               | 263535_at   | -3.5 |
| flax rust resistance protein, putative similar to flax rust resistance protein GI:4588066 from [ <i>Linum usitatissimum</i> ]; supported by full-length cDNA: C     | 262374_s_at | -3.5 |
| 33 kDa secretory protein-like ; supported by cDNA: gi_15292980_gb_AY050924.1_                                                                                       | 248686_at   | -3.5 |
| putative protein similar to unknown protein (pir T05055)                                                                                                            | 248047_at   | -3.5 |
| disease resistance protein RPP1-WsB, putative similar to disease resistance protein RPP1-WsB GI:9279731 from [ <i>Arabidopsis thaliana</i> ]                        | 246405_at   | -3.5 |
| putative ethylene response element binding protein (EREBP) ;supported by full-length cDNA: Ceres:6397.                                                              | 266821_at   | -3.4 |

|                                                                                                                                                   |           |      |
|---------------------------------------------------------------------------------------------------------------------------------------------------|-----------|------|
| putative endoxyloglucan glycosyltransferase identical to GB:D16454:supported by full-length cDNA: Ceres:15276.                                    | 266215_at | -3.4 |
| unknown protein similar to gb T45484, emb Z30724, and emb Z30531                                                                                  | 264824_at | -3.4 |
| virus resistance protein, putative similar to virus resistance protein GI:558886 from [Nicotiana glutinosa]                                       | 262382_at | -3.4 |
| hypothetical protein predicted by genscan+:supported by full-length cDNA: Ceres:4146.                                                             | 256796_at | -3.4 |
| myb-related protein similar to GI:7981380 from [Lycopersicon esculentum]                                                                          | 256503_at | -3.4 |
| hypothetical protein                                                                                                                              | 255978_at | -3.4 |
| putative protein                                                                                                                                  | 250575_at | -3.4 |
| glutaredoxin                                                                                                                                      | 245505_at | -3.4 |
| putative protein                                                                                                                                  | 249505_at | -3.4 |
| putative harpin-induced protein ;supported by full-length cDNA: Ceres:19481.                                                                      | 263951_at | -3.3 |
| hypothetical protein similar to calmodulin-like protein GB:CAB42906 [Arabidopsis thaliana]; Pfam HMM hit: EF hand; supported by full-length cDNA: | 258947_at | -3.3 |
| putative calmodulin similar to calmodulin GB:P04352 [Chlamydomonas reinhardtii]; contains Pfam profile: PF00036 EF hand (4 copies); supported t   | 258617_at | -3.3 |
| unknown protein ; supported by cDNA: gi_15529233_gb_AY052241.1_                                                                                   | 258225_at | -3.3 |
| leucine rich repeat protein, putative contains multiple LRR repeats Pfam profile: PF00560; supported by full-length cDNA: Ceres: 29675.           | 256237_at | -3.3 |
| putative protein ENOD16, Medicago truncatula, X99466:supported by full-length cDNA: Ceres:6308.                                                   | 253480_at | -3.3 |
| cytochrome P450 monooxygenase - like protein cytochrome P450 monooxygenase CYP91A2, Arabidopsis thaliana, D78607:supported by full-leng           | 253073_at | -3.3 |
| hypothetical protein                                                                                                                              | 252361_at | -3.3 |
| bZIP DNA-binding protein-like putative bZIP DNA-binding protein - Capsicum chinense, EMBL:AF127797                                                | 246522_at | -3.3 |
| putative pectinesterase                                                                                                                           | 245052_at | -3.3 |
| unknown protein                                                                                                                                   | 248963_at | -3.3 |
| putative glutaredoxin ;supported by full-length cDNA: Ceres:21006.                                                                                | 266516_at | -3.2 |
| unknown protein ;supported by full-length cDNA: Ceres:32647.                                                                                      | 265400_at | -3.2 |
| hypothetical protein predicted by genscan; supported by cDNA: gi_15724317_gb_AF412099.1_AF412099                                                  | 265342_at | -3.2 |
| hypothetical protein predicted by genemark.hmm                                                                                                    | 261221_at | -3.2 |
| unknown protein ; supported by full-length cDNA: Ceres: 16614.                                                                                    | 259841_at | -3.2 |
| putative phosphate/phosphoenolpyruvate translocator similar to phosphate/phosphoenolpyruvate translocator precursor GB:AAB40648 [Nicotiana t      | 259185_at | -3.2 |
| unknown protein ; supported by full-length cDNA: Ceres: 368.                                                                                      | 256617_at | -3.2 |
| Similar to receptor kinase                                                                                                                        | 255654_at | -3.2 |
| putative phi-1-like phosphate-induced protein ;supported by full-length cDNA: Ceres:3552.                                                         | 255064_at | -3.2 |
| putative protein CGI-131 protein, Homo sapiens, AF151889:supported by full-length cDNA: Ceres:24573.                                              | 254387_at | -3.2 |
| putative polygalacturonase polygalacturonase (EC 3.2.1.15) - avocado, EMBL:X66426                                                                 | 254221_at | -3.2 |
| putative protein centrin, Marsilea vestita:supported by full-length cDNA: Ceres:13072.                                                            | 253915_at | -3.2 |
| putative calcium-binding protein calcium binding domains (EF hand) of several proteins                                                            | 252417_at | -3.2 |
| putative protein predicted protein, Arabidopsis thaliana                                                                                          | 249918_at | -3.2 |
| unknown protein                                                                                                                                   | 249932_at | -3.2 |
| unknown protein ; supported by cDNA: gi_14190416_gb_AF378886.1_AF378886                                                                           | 249894_at | -3.2 |
| ethylene responsive element binding factor 5 (ATERF5) (sp O80341) ; supported by cDNA: gi_14326511_gb_AF385709.1_AF385709                         | 248799_at | -3.2 |
| Expressed protein ; supported by full-length cDNA: Ceres: 15527.                                                                                  | 248509_at | -3.2 |
| putative phytochelatin synthetase - like putative phytochelatin synthetase, Arabidopsis thaliana, EMBL:ATH6787                                    | 247604_at | -3.2 |
| putative protein similar to unknown protein (gb AAF67766.1);supported by full-length cDNA: Ceres:512.                                             | 246997_at | -3.2 |
| Expressed protein ; supported by full-length cDNA: Ceres: 30087.                                                                                  | 245318_at | -3.2 |
| cytochrome b6-f complex, subunit V                                                                                                                | 244966_at | -3.2 |
| similar to cold acclimation protein WCOR413 [Triticum aestivum]                                                                                   | 267288_at | -3.1 |
| unknown protein ; supported by cDNA: gi_15294169_gb_AF410276.1_AF410276                                                                           | 266552_at | -3.1 |
| unknown protein Similar to acid phosphatase; Location of ESTs 110C2T7 , gb T42036, and 110C2XP, gb AI100245; supported by cDNA: gi_13926          | 265042_at | -3.1 |
| class 1 non-symbiotic hemoglobin (AHB1) identical to GP:2581783:U94998:supported by full-length cDNA: Ceres:18195.                                | 263096_at | -3.1 |
| ubiquitin-fusion protein, putative similar to ubiquitin-fusion protein GI:9725 from [Manduca sexta];supported by full-length cDNA: Ceres:34600.   | 262196_at | -3.1 |
| hypothetical protein predicted by genemark.hmm:supported by full-length cDNA: Ceres:157.                                                          | 260804_at | -3.1 |
| lipase/hydrolase, putative contains Pfam profile: PF00657 Lipase/Acylhydrolase with GDSL-like motif:supported by full-length cDNA: Ceres:6680.    | 259786_at | -3.1 |
| AIG2-like protein similar to AIG2 protein GB:P54121 from [Arabidopsis thaliana];supported by full-length cDNA: Ceres:28511.                       | 258002_at | -3.1 |
| hypothetical protein contains similarity to MtN3(nodulin) protein GB:Y08726 GI:1619601 from [Medicago truncatula]; supported by cDNA: gi_15809    | 256548_at | -3.1 |
| sucrose-phosphate synthase - like protein sucrose-phosphate synthase, Zea mays, PIR2:JQ1329                                                       | 255016_at | -3.1 |
| response reactor 2 (ATRR2) ; supported by cDNA: gi_3273197_dbj_AB010916.1_AB010916                                                                | 252374_at | -3.1 |
| putative protein latex protein allergen Hev b 7 - Hevea brasiliensis, EMBL:AF113546; supported by cDNA: gi_15912226_gb_AY056391.1_                | 251174_at | -3.1 |
| protein phosphatase - like protein protein phosphatase 2C homolog, Mesembryanthemum crystallinum, EMBL:AF097667                                   | 251017_at | -3.1 |
| putative protein ;supported by full-length cDNA: Ceres:1336.                                                                                      | 250968_at | -3.1 |
| unknown protein ;supported by full-length cDNA: Ceres:207075.                                                                                     | 249836_at | -3.1 |

|                                                                                                                                                      |             |      |
|------------------------------------------------------------------------------------------------------------------------------------------------------|-------------|------|
| hypothetical protein predicted by genemark.hmm;supported by full-length cDNA: Ceres:42217.                                                           | 245755_at   | -3.1 |
| Expressed protein ; supported by full-length cDNA: Ceres: 37809.                                                                                     | 245329_at   | -3.1 |
| ribosomal protein L23                                                                                                                                | 244988_s_at | -3.1 |
| unknown protein ;supported by full-length cDNA: Ceres:32244.                                                                                         | 267034_at   | -3   |
| unknown protein                                                                                                                                      | 265539_at   | -3   |
| unknown protein ;supported by full-length cDNA: Ceres:102453.                                                                                        | 263981_at   | -3   |
| unknown protein                                                                                                                                      | 260904_at   | -3   |
| 12-oxophytodienoate reductase (OPR2) identical to 12-oxophytodienoate reductase OPR2 GB:AACT78441 [Arabidopsis thaliana]                             | 259875_s_at | -3   |
| hypothetical protein predicted by genscan+                                                                                                           | 259385_at   | -3   |
| DNA-binding protein RAV1 identical to RAV1 GI:3868857 from [Arabidopsis thaliana]; supported by cDNA: gi_3868856_dbj_AB013886.1_AB01388              | 259364_at   | -3   |
| putative GDSL-motif lipase/acylhydrolase contains Pfam profile: lipase/acylhydrolase with GDSL-like motif;supported by full-length cDNA: Ceres:13;   | 258589_at   | -3   |
| putative disease resistance protein similar to disease resistance protein RPP1-WsC GB:AACT72979 [Arabidopsis thaliana]; supported by cDNA: gi_1      | 258537_at   | -3   |
| glycine-rich RNA-binding protein, putative similar to glycine-rich RNA-binding protein GI:17818 from [Brassica napus]                                | 255962_at   | -3   |
| pEARLI 1 ; supported by cDNA: gi_871779_gb_L43080.1_ATHPEAR                                                                                          | 254805_at   | -3   |
| histone H3 - like protein histone H3, Arabidopsis thaliana, PIR:S06250                                                                               | 250434_at   | -3   |
| hypothetical protein predicted by genscan;supported by full-length cDNA: Ceres:6295.                                                                 | 264672_at   | -2.9 |
| glutaredoxin, putative similar to glutaredoxin GI:2244924 from [Arabidopsis thaliana]; supported by cDNA: gi_13358219_gb_AF325030.2_AF32503          | 261443_at   | -2.9 |
| putative chlorophyll A-B binding protein similar to chlorophyll A-B binding protein 151 precursor (LHCP) GB:P27518 from [Gossypium hirsutum];sup     | 258239_at   | -2.9 |
| Expressed protein ; supported by full-length cDNA: Ceres: 32396.                                                                                     | 251142_at   | -2.9 |
| NaCl-inducible Ca2+-binding protein-like; calmodulin-like ; supported by cDNA: gi_13358217_gb_AF325028.2_AF325028                                    | 248607_at   | -2.9 |
| DC1.2 homologue - like protein DC1.2 homologue, Nicotiana tabacum, EMBL:AB009888                                                                     | 247478_at   | -2.9 |
| ethylene-responsive element - like protein ethylene-responsive element binding protein homolog, Stylosanthes hamata, EMBL:U91857; supported          | 246932_at   | -2.9 |
| putative protein                                                                                                                                     | 246270_at   | -2.9 |
| phosphate-induced (phi-1) protein, putative similar to phi-1 GB:BAA33810 GI:3759184 from [Nicotiana tabacum];supported by full-length cDNA: Ce       | 245757_at   | -2.9 |
| glutaredoxin homolog                                                                                                                                 | 245506_at   | -2.9 |
| putative protein contains similarity to elicitor-inducible receptor-like protein                                                                     | 247087_at   | -2.9 |
| omega-3 fatty acid desaturase identical to GB:D26508 and GB:D17579; supported by cDNA: gi_1030693_dbj_D17579.1_ATHFADIER2                            | 266865_at   | -2.8 |
| expansin AtEx6 identical to GB U30480; supported by full-length cDNA: Ceres: 17914.                                                                  | 266790_at   | -2.8 |
| putative alcohol dehydrogenase                                                                                                                       | 266761_at   | -2.8 |
| putative copper/zinc superoxide dismutase identical to GP:3273753:AF061519;supported by full-length cDNA: Ceres:39796.                               | 266165_at   | -2.8 |
| hypothetical protein predicted by genscan                                                                                                            | 265724_at   | -2.8 |
| superoxidase dismutase identical to GB:P24704;supported by full-length cDNA: Ceres:33493.                                                            | 264809_at   | -2.8 |
| zinc finger protein ATZF1, putative identical to GB:BAA25989; supported by cDNA: gi_3123711_dbj_D89051.1_D89051                                      | 264624_at   | -2.8 |
| putative response regulator 3 similar to ESTs gb T43772, emb Z34204, gb AA067391, and emb Z34620, implicated in His-to-Asp phosphotransfer ;         | 263236_at   | -2.8 |
| late embryogenesis abundant protein, putative similar to late embryogenesis abundant protein 5 GI:2981167 from [Nicotiana tabacum];supported by full | 262113_at   | -2.8 |
| GAST1-like protein similar to GAST1 protein precursor GB:P27057 [Lycopersicon esculentum] (induced by gibberellins, inhibited by ABA Plant J 19      | 260221_at   | -2.8 |
| unknown protein ; supported by full-length cDNA: Ceres: 21882.                                                                                       | 258249_s_at | -2.8 |
| putative zinc finger protein contains Pfam profile: PF00641 Zn-finger in Ran binding protein and others;supported by full-length cDNA: Ceres:8265.   | 258222_at   | -2.8 |
| unknown protein ; supported by full-length cDNA: Ceres: 148308.                                                                                      | 256456_at   | -2.8 |
| hypothetical protein predicted by genefinder;supported by full-length cDNA: Ceres:12509.                                                             | 256442_at   | -2.8 |
| putative gamma-glutamyltransferase gamma-glutamyltransferase, Arabidopsis thaliana, PIR2:S58286                                                      | 252906_at   | -2.8 |
| Histone H4 - like protein histone H4, Zea mays, PIR:HSZM4;supported by full-length cDNA: Ceres:22146.                                                | 252562_s_at | -2.8 |
| glutaredoxin -like protein glutaredoxin, castor bean, PIR:S54825                                                                                     | 251196_at   | -2.8 |
| unknown protein ; supported by cDNA: gi_15810044_gb_AY054291.1_                                                                                      | 250828_at   | -2.8 |
| histone H3 - like protein histone H3, Arabidopsis thaliana, PIR:S06250                                                                               | 250433_at   | -2.8 |
| putative protein putative DNA-binding protein - Arabidopsis thaliana, EMBL:AC011765;supported by full-length cDNA: Ceres:4734.                       | 249383_at   | -2.8 |
| Expressed protein ; supported by full-length cDNA: Ceres: 36971.                                                                                     | 248460_at   | -2.8 |
| putative protein similar to unknown protein (pir T04819)                                                                                             | 248139_at   | -2.8 |
| hypothetical protein ; supported by full-length cDNA: Ceres: 933.                                                                                    | 245304_at   | -2.8 |
| unknown protein ;supported by full-length cDNA: Ceres:125631.                                                                                        | 267209_at   | -2.7 |
| putative metalloproteinase similar to GB:AAB61099                                                                                                    | 264866_at   | -2.7 |
| hypothetical protein predicted by genemark.hmm                                                                                                       | 261772_at   | -2.7 |
| hypothetical protein predicted by genemark.hmm;supported by full-length cDNA: Ceres:3200.                                                            | 261456_at   | -2.7 |
| chloroplast nucleoid DNA binding protein, putative similar to chloroplast nucleoid DNA binding protein GB:BAA22813 GI:2541876 from [Nicotiana t      | 261055_at   | -2.7 |
| putative elicitor-responsive gene similar to elicitor-responsive gene-3 GB:AACT35866 from [Oryza sativa];supported by full-length cDNA: Ceres:1896   | 260083_at   | -2.7 |
| unknown protein ; supported by cDNA: gi_14596082_gb_AY042829.1_                                                                                      | 259791_at   | -2.7 |
| nicotianamine synthase, putative similar to nicotianamine synthase [Arabidopsis thaliana] GI:4220614                                                 | 259632_at   | -2.7 |

|                                                                                                                                                                  |             |      |
|------------------------------------------------------------------------------------------------------------------------------------------------------------------|-------------|------|
| delta 9 desaturase, putative similar to delta 9 desaturase GI:2970034 from [Arabidopsis thaliana]                                                                | 259391_s_at | -2.7 |
| unknown protein contains helix-loop-helix DNA binding motif                                                                                                      | 259010_at   | -2.7 |
| putative syntaxin contains Pfam profile: PF00804 syntaxin;supported by full-length cDNA: Ceres:38899.                                                            | 258786_at   | -2.7 |
| putative pectate lyase similar to pectate lyase 2 GB:AAF19196 [Musa acuminata]; supported by full-length cDNA: Ceres: 124816.                                    | 258552_at   | -2.7 |
| putative flowering-time gene CONSTANS (COL2) identical to putative flowering-time gene CONSTANS (COL2) GB:AAB67879 GI:1507699 (Arabidopsis thaliana)             | 258497_at   | -2.7 |
| protein kinase, putative contains Pfam profile: PF00069: Eukaryotic protein kinase domain                                                                        | 256366_at   | -2.7 |
| Expressed protein ; supported by cDNA: gi_14190492_gb_AF380646.1_AF380646                                                                                        | 253423_at   | -2.7 |
| putative protein similar to unknown protein (dbj)BAA92898.1;supported by full-length cDNA: Ceres:97314.                                                          | 249230_at   | -2.7 |
| putative protein hypothetical protein F16B3.27 - Arabidopsis thaliana, EMBL:AC021640;supported by full-length cDNA: Ceres:18222.                                 | 246505_at   | -2.7 |
| transcriptional co-activator-like protein putative transcriptional co-activator (KIWI) - Arabidopsis thaliana, EMBL:AF053302                                     | 245930_at   | -2.7 |
| putative protein similarity to predicted proteins, Arabidopsis thaliana                                                                                          | 245155_at   | -2.7 |
| ATPase alpha subunit                                                                                                                                             | 245024_at   | -2.7 |
| dynein light chain, putative similar to dynein light chain 1, cytoplasmic SP:Q15701 [Homo sapiens]                                                               | 257504_at   | -2.7 |
| putative protein contains similarity to ATPF3                                                                                                                    | 248527_at   | -2.7 |
| pathogenesis-related PR-1-like protein identical to GB:M90508; supported by cDNA: gi_166860_gb_M90508.1_ATHRPRP1A                                                | 266385_at   | -2.6 |
| putative nonspecific lipid-transfer protein precursor ; supported by full-length cDNA: Ceres: 24286.                                                             | 265656_at   | -2.6 |
| hypothetical protein similar to embryo-abundant protein GB:L47672 GI:1350530 from [Picea glauca]; supported by cDNA: gi_14335021_gb_AY037                        | 265075_at   | -2.6 |
| hypothetical protein predicted by genefinder;supported by full-length cDNA: Ceres:271253.                                                                        | 265067_at   | -2.6 |
| lipoyltransferase identical to GB:BAA78386; supported by cDNA: gi_4996285_dbj_AB020975.1_AB020975                                                                | 264613_at   | -2.6 |
| unknown protein ;supported by full-length cDNA: Ceres:11114.                                                                                                     | 263628_at   | -2.6 |
| unknown protein similar to putative DNA-binding protein GI:6714399 from [Arabidopsis thaliana];supported by full-length cDNA: Ceres:92341.                       | 261942_at   | -2.6 |
| endo-xyloglucan transferase, putative similar to endo-xyloglucan transferase GI:2244732 from [Gossypium hirsutum];supported by full-length cDNA                  | 261825_at   | -2.6 |
| DNA-binding protein, putative similar to DNA binding protein CCA1 from [Arabidopsis thaliana]                                                                    | 261569_at   | -2.6 |
| unknown protein ;supported by full-length cDNA: Ceres:142725.                                                                                                    | 259980_at   | -2.6 |
| auxin-induced protein, putative similar to SP:P33083 from [Glycine max];supported by full-length cDNA: Ceres:9311.                                               | 259783_at   | -2.6 |
| auxin-induced protein, putative similar to SP:P33083 from [Glycine max];supported by full-length cDNA: Ceres:4119.                                               | 259790_s_at | -2.6 |
| unknown protein                                                                                                                                                  | 258419_at   | -2.6 |
| putative cytochrome c oxidase subunit Vb similar to cytochrome oxidase IV GB:223590 [Bos taurus]; contains Pfam profile: PF01215 cytochrome c oxidase subunit Vb | 258274_at   | -2.6 |
| unknown protein ;supported by full-length cDNA: Ceres:96816.                                                                                                     | 257793_at   | -2.6 |
| unknown protein                                                                                                                                                  | 256633_at   | -2.6 |
| putative protein other hypothetical proteins in Arabidopsis thaliana; supported by cDNA: gi_6457330_gb_AF188329.1_AF188329                                       | 252060_at   | -2.6 |
| putative protein contains similarity to DNA-binding protein                                                                                                      | 249890_at   | -2.6 |
| amino acid permease 6 (emb CAA65051.1)                                                                                                                           | 248619_at   | -2.6 |
| putative protein similar to unknown protein (emb)CAA71173.1;supported by full-length cDNA: Ceres:19542.                                                          | 248327_at   | -2.6 |
| isp4 like protein ; supported by cDNA: gi_15451019_gb_AY054590.1_                                                                                                | 245296_at   | -2.6 |
| hypothetical protein ; supported by cDNA: gi_15810232_gb_AY056155.1_                                                                                             | 245265_at   | -2.6 |
| putative expansin                                                                                                                                                | 267158_at   | -2.5 |
| Expressed protein ; supported by full-length cDNA: Ceres: 7600.                                                                                                  | 266500_at   | -2.5 |
| hypothetical protein predicted by gensec                                                                                                                         | 266070_at   | -2.5 |
| unknown protein Location of EST gb T41885 and gb AA395021                                                                                                        | 264521_at   | -2.5 |
| unknown protein                                                                                                                                                  | 262694_at   | -2.5 |
| chalcone isomerase, putative similar to GI:4126399 from (Citrus sinensis);supported by full-length cDNA: Ceres:116131.                                           | 260982_at   | -2.5 |
| ATHVA22c identical to ATHVA22c GB:AF141661 [Arabidopsis thaliana];supported by full-length cDNA: Ceres:108964.                                                   | 260368_at   | -2.5 |
| sucrose transport protein SUC1 identical to GB:S38197 from [Arabidopsis thaliana]; supported by cDNA: gi_15146267_gb_AY049275.1_                                 | 260143_at   | -2.5 |
| germin-like protein similar to germin precursor GB:P26759 [Triticum aestivum]; contains Pfam profile: PF01072 Germin family;supported by full-length cDNA        | 259892_at   | -2.5 |
| Expressed protein ; supported by full-length cDNA: Ceres: 35429.                                                                                                 | 258349_at   | -2.5 |
| unknown protein identical to unknown protein GI:9755444 from (Arabidopsis thaliana); supported by full-length cDNA: Ceres: 110066.                               | 255856_at   | -2.5 |
| putative receptor-like protein kinase                                                                                                                            | 255344_s_at | -2.5 |
| putative protein probable arabinogalactan protein precursor, Lycopersicon esculentum, PIR2:S55925; supported by cDNA: gi_11935087_gb_AF30                        | 253050_at   | -2.5 |
| unknown protein ;supported by full-length cDNA: Ceres:262293.                                                                                                    | 250665_at   | -2.5 |
| glutaredoxin-like protein glutaredoxin, castor bean, PIR:S54825;supported by full-length cDNA: Ceres:92720.                                                      | 249996_at   | -2.5 |
| putative protein similar to unknown protein (pir)T00970; supported by cDNA: gi_15215722_gb_AY050390.1_                                                           | 249817_at   | -2.5 |
| putative protein similar to unknown protein (gb)AAF32471.1)                                                                                                      | 249659_s_at | -2.5 |
| putative protein similar to unknown protein (gb)AAF04428.1);supported by full-length cDNA: Ceres:27668.                                                          | 248028_at   | -2.5 |
| putative protein ;supported by full-length cDNA: Ceres:22013.                                                                                                    | 246905_at   | -2.5 |
| germin-like protein ; supported by cDNA: gi_14517363_gb_AY039516.1_                                                                                              | 246004_at   | -2.5 |
| hypothetical protein similar to putative disease resistance protein GB:AAC14512 GI:2739389 from [Arabidopsis thaliana];supported by full-length cDNA             | 245768_at   | -2.5 |



|                                                                                                                                                    |             |      |
|----------------------------------------------------------------------------------------------------------------------------------------------------|-------------|------|
| ribosomal protein L2                                                                                                                               | 244987_s_at | -2.5 |
| NADH dehydrogenase ND4L                                                                                                                            | 244933_at   | -2.5 |
| Expressed protein ; supported by full-length cDNA: Ceres: 2083.                                                                                    | 257191_at   | -2.5 |
| putative steroid sulfotransferase ; supported by cDNA: gi_599639_emb_Z46823.1_ATT54391                                                             | 264042_at   | -2.4 |
| unknown protein ;supported by full-length cDNA: Ceres:15081.                                                                                       | 263431_at   | -2.4 |
| Expressed protein ; supported by cDNA: gi_15293050_gb_AY050959.1_                                                                                  | 263210_at   | -2.4 |
| protein kinase, putative contains similarity to many predicted protein kinases; supported by cDNA: gi_13430527_gb_AF360176.1_AF360176              | 261308_at   | -2.4 |
| expansin 10 identical to GB:AAF61712 from [Arabidopsis thaliana];supported by full-length cDNA: Ceres:14132.                                       | 261266_at   | -2.4 |
| expansin S2 precursor, putative similar to GB:U30460 from [Cucumis sativus];supported by full-length cDNA: Ceres:11011.                            | 261226_at   | -2.4 |
| hypothetical protein                                                                                                                               | 259523_at   | -2.4 |
| unknown protein similar to unknown protein GB:AAC62613 [Arabidopsis thaliana]; supported by cDNA: gi_14532567_gb_AY039908.1_                       | 259018_at   | -2.4 |
| ribonucleotide reductase small subunit, putative similar to RIBONUCLEOSIDE-DIPHOSPHATE REDUCTASE SMALL CHAIN GB:P49730 from [Nicotiana glauca]     | 257809_at   | -2.4 |
| Expressed protein ; supported by full-length cDNA: Ceres: 11616.                                                                                   | 257204_at   | -2.4 |
| putative protein                                                                                                                                   | 255652_at   | -2.4 |
| putative protein similar to T5J8.18                                                                                                                | 255450_at   | -2.4 |
| putative Fe(II)/ascorbate oxidase SRG1 protein - Arabidopsis thaliana, PIR2:S44261                                                                 | 254975_at   | -2.4 |
| serine/threonine kinase - like protein serine/threonine kinase, Brassica oleracea; supported by cDNA: gi_14423417_gb_AF386946.1_AF386946           | 254255_at   | -2.4 |
| fructose-bisphosphate aldolase - like protein fructose-bisphosphate aldolase, Arabidopsis thaliana, PIR1:ADMU;supported by full-length cDNA: Cer   | 253971_at   | -2.4 |
| predicted protein ; supported by cDNA: gi_15293232_gb_AY051050.1_                                                                                  | 253525_at   | -2.4 |
| NAC-domain protein-like ;supported by full-length cDNA: Ceres:29829.                                                                               | 249940_at   | -2.4 |
| putative protein contains similarity to surface protein; supported by cDNA: gi_16648846_gb_AY058201.1_                                             | 249037_at   | -2.4 |
| DNA (cytosine-5)-methyltransferase (DNA methyltransferase) (DNA metase) (sp)P34881) ; supported by cDNA: gi_304106_gb_L10692.1_ATHME               | 248597_at   | -2.4 |
| putative protein similar to unknown protein (gb)AAC24386.1)                                                                                        | 248191_at   | -2.4 |
| Isp4-like protein ; supported by full-length cDNA: Ceres: 3109.                                                                                    | 247284_at   | -2.4 |
| calmodulin-binding - like protein calmodulin-binding protein TCB60, Nicotiana tabacum, EMBL:U58971                                                 | 246821_at   | -2.4 |
| putative protein ;supported by full-length cDNA: Ceres:16131.                                                                                      | 246200_at   | -2.4 |
| putative protein auxin-induced basic helix-loop-helix transcription factor, Gossypium hirsutum, EMBL:AF165924; supported by cDNA: gi_15724267      | 246011_at   | -2.4 |
| glutaredoxin                                                                                                                                       | 245504_at   | -2.4 |
| hypothetical protein predicted by genscan and genefinder                                                                                           | 257382_at   | -2.4 |
| hypothetical protein similar to GB:AAB97719 from [Arabidopsis thaliana]                                                                            | 258409_at   | -2.4 |
| putative proline-rich protein ; supported by full-length cDNA: Ceres: 28853.                                                                       | 267260_at   | -2.3 |
| putative acetone-cyanohydrin lyase                                                                                                                 | 267126_s_at | -2.3 |
| unknown protein ;supported by full-length cDNA: Ceres:31586.                                                                                       | 267092_at   | -2.3 |
| calmodulin (cam2)                                                                                                                                  | 267064_at   | -2.3 |
| nodulin-like protein                                                                                                                               | 265414_at   | -2.3 |
| unknown protein ; supported by cDNA: gi_6691164_gb_AF218765.1_AF218765                                                                             | 263498_at   | -2.3 |
| putative glucosyltransferase ; supported by full-length cDNA: Ceres: 114997.                                                                       | 263473_at   | -2.3 |
| putative GDSL-motif lipase/hydrolase similar to APG proteins; pFAM domain PF00657;supported by full-length cDNA: Ceres:121397.                     | 263482_at   | -2.3 |
| unknown protein ;supported by full-length cDNA: Ceres:641.                                                                                         | 263421_at   | -2.3 |
| disease resistance protein, putative similar to disease resistance protein Gl:9758876 from [Arabidopsis thaliana]                                  | 262383_at   | -2.3 |
| unknown protein ;supported by full-length cDNA: Ceres:12408.                                                                                       | 262168_at   | -2.3 |
| tubulin alpha-2/alpha-4 chain, putative identical to tubulin alpha-2/alpha-4 chain GB:P29510 from [Arabidopsis thaliana]; supported by cDNA: gi_15 | 261639_at   | -2.3 |
| hypothetical protein similar to YGL010w-like protein GB:AAC32136 [Picea mariana]                                                                   | 260211_at   | -2.3 |
| hypothetical protein ;supported by full-length cDNA: Ceres:265772.                                                                                 | 259550_at   | -2.3 |
| response regulator 5, putative similar to response regulator 5 Gl:3953599 from [Arabidopsis thaliana]; supported by cDNA: gi_3953602_dbj_AB008     | 259466_at   | -2.3 |
| putative pectinesterase contains similarity to pectinesterase GB:AAB57671 [Citrus sinensis]                                                        | 258764_at   | -2.3 |
| unknown protein contains Pfam profile:PF00295 Polygalacturonase;supported by full-length cDNA: Ceres:38575.                                        | 258528_at   | -2.3 |
| unknown protein ; supported by cDNA: gi_15451205_gb_AY054683.1_                                                                                    | 258156_at   | -2.3 |
| hypothetical protein contains Pfam profile: PF01657 Domain of unknown function; supported by cDNA: gi_14334417_gb_AY034900.1_                      | 257264_at   | -2.3 |
| unknown protein                                                                                                                                    | 257074_at   | -2.3 |
| unknown protein similar to cell wall-plasma membrane linker protein GB:CAA64425 from [Brassica napus]                                              | 256825_at   | -2.3 |
| putative protein                                                                                                                                   | 255662_at   | -2.3 |
| pEARLI 1-like protein Arabidopsis thaliana pEARLI 1 mRNA, PID:g871780                                                                              | 254818_at   | -2.3 |
| Expressed protein ; supported by full-length cDNA: Ceres: 38416.                                                                                   | 253305_at   | -2.3 |
| endo-xyloglucan transferase - like protein endo-xyloglucan transferase, Gossypium hirsutum, D88413;supported by full-length cDNA: Ceres:14263.     | 253040_at   | -2.3 |
| putative protein hypothetical protein F4118.26 - Arabidopsis thaliana, PIR:T02471;supported by full-length cDNA: Ceres:30454.                      | 251336_at   | -2.3 |
| putative protein                                                                                                                                   | 250075_at   | -2.3 |

|                                                                                                                                                    |             |      |
|----------------------------------------------------------------------------------------------------------------------------------------------------|-------------|------|
| putative protein contains similarity to ornithine cyclodeaminase;supported by full-length cDNA: Ceres:114678.                                      | 248330_at   | -2.3 |
| peroxidase ;supported by full-length cDNA: Ceres:124846.                                                                                           | 247812_at   | -2.3 |
| putative protein predicted protein, Arabidopsis thaliana;supported by full-length cDNA: Ceres:32599.                                               | 246550_at   | -2.3 |
| NADH dehydrogenase ND6                                                                                                                             | 244934_at   | -2.3 |
| putative disease resistance protein                                                                                                                | 267546_at   | -2.2 |
| unknown protein ; supported by cDNA: gi_14326466_gb_AF385686.1_AF385686                                                                            | 266460_at   | -2.2 |
| Expressed protein ; supported by full-length cDNA: Ceres: 5586.                                                                                    | 264164_at   | -2.2 |
| hypothetical protein predicted by genscan; supported by cDNA: gi_15810330_gb_AY056204.1_                                                           | 263800_at   | -2.2 |
| unknown protein location of EST TAT5A03; 5 end, gb Z26679                                                                                          | 262656_at   | -2.2 |
| invertase, putative similar to neutral invertase GB:76145 GI:4200165 from [Daucus carota]                                                          | 262038_at   | -2.2 |
| hypothetical protein predicted by genemark.hmm                                                                                                     | 260656_at   | -2.2 |
| unknown protein similar to hypothetical protein GB:AAD12705 [Arabidopsis thaliana];supported by full-length cDNA: Ceres:40506.                     | 260179_at   | -2.2 |
| auxin-induced protein, putative similar to SP:P33083 from [Glycine max];supported by full-length cDNA: Ceres:29931.                                | 259784_at   | -2.2 |
| GTP-binding protein RAB7D, putative similar to GI:1370187 from [Lotus japonicus] (Plant J. 11 (2), 237-250 (1997)); supported by cDNA: gi_15718    | 259611_at   | -2.2 |
| unknown protein ; supported by cDNA: gi_15028124_gb_AY046012.1_                                                                                    | 258728_at   | -2.2 |
| xyloglucan endotransglycosylase, putative similar to xyloglucan endotransglycosylase 1 GB:CAA10231 from [Fagus sylvatica] (Plant Physiol.(1999     | 257203_at   | -2.2 |
| sterol-C-methyltransferase identical to sterol-C-methyltransferase GI:1061040 from [Arabidopsis thaliana];supported by full-length cDNA: Ceres:268 | 255885_at   | -2.2 |
| unknown protein ;supported by full-length cDNA: Ceres:35273.                                                                                       | 255817_at   | -2.2 |
| putative protein polyphosphoinositide binding protein Ssh2, Glycine max, gb:T05953                                                                 | 255082_at   | -2.2 |
| acyl carrier - like protein acyl carrier protein, Cuphea lanceolata, PIR2:S42026;supported by full-length cDNA: Ceres:11559.                       | 254102_at   | -2.2 |
| auxin-induced protein - like auxin-inducible SAUR gene, Raphanus sativus,AB000708;supported by full-length cDNA: Ceres:10140.                      | 252972_at   | -2.2 |
| putative protein hypothetical protein - Arabidopsis thaliana, EMBL:CAB38293;supported by full-length cDNA: Ceres:17840.                            | 252220_at   | -2.2 |
| hypothetical protein ; supported by cDNA: gi_13605735_gb_AF361849.1_AF361849                                                                       | 252170_at   | -2.2 |
| putative protein polygalacturonase - Lycopersicon esculentum, EMBL:AF118567; supported by cDNA: gi_13358184_gb_AF324992.2_AF324992                 | 251261_at   | -2.2 |
| polygalacturonase inhibiting protein ;supported by full-length cDNA: Ceres:35527.                                                                  | 250669_at   | -2.2 |
| putative serine rich protein predicted proteins, Arabidopsis thaliana;supported by full-length cDNA: Ceres:36958.                                  | 250327_at   | -2.2 |
| DNA helicase-like                                                                                                                                  | 249677_at   | -2.2 |
| putative protein similar to unknown protein (emb CAB79759.1)                                                                                       | 247880_at   | -2.2 |
| putative protein similar to unknown protein (emb CAB61744.1); supported by full-length cDNA: Ceres: 31648.                                         | 247214_at   | -2.2 |
| sugar transporter like protein                                                                                                                     | 246238_at   | -2.2 |
| auxin-induced protein, putative similar to SP:P33083 from [Glycine max]                                                                            | 257506_at   | -2.2 |
| myb-like protein isolog                                                                                                                            | 267495_at   | -2.1 |
| putative PREG1-like negative regulator                                                                                                             | 266873_at   | -2.1 |
| histone H4 identical to GB:M17133 and GB:M17132;supported by full-length cDNA: Ceres:32642.                                                        | 266226_at   | -2.1 |
| unknown protein ; supported by full-length cDNA: Ceres: 29227.                                                                                     | 265116_at   | -2.1 |
| glutathione transferase, putative similar to glutathione S-transferase GB: AAF22517 GI:6652870 from [Papaver somniferum];supported by full-leng    | 264986_at   | -2.1 |
| unknown protein ;supported by full-length cDNA: Ceres:25136.                                                                                       | 264635_at   | -2.1 |
| putative mutT domain protein                                                                                                                       | 263852_at   | -2.1 |
| unknown protein                                                                                                                                    | 262092_at   | -2.1 |
| hypothetical protein predicted by genemark.hmm; supported by cDNA: gi_16648778_gb_AY058166.1_                                                      | 259373_at   | -2.1 |
| unknown protein similar to putative protein GB:CAB38214 [Arabidopsis thaliana];supported by full-length cDNA: Ceres:6052.                          | 258811_at   | -2.1 |
| unknown protein ; supported by cDNA: gi_14532647_gb_AY039948.1_                                                                                    | 258535_at   | -2.1 |
| unknown protein contains similarity to 3-methyladenine-DNA glycosidase I GB:P05100 from [Escherichia coli];supported by full-length cDNA: Ceres    | 257701_at   | -2.1 |
| S-adenosyl-L-homocysteinase, putative similar to S-adenosyl-L-homocysteinase GB:AAD56048 from [Lupinus luteus]; supported by cDNA: gi_1529;        | 257173_at   | -2.1 |
| beta-fructofuranosidase identical to beta-fructofuranosidase GI:6683112 from [Arabidopsis thaliana]; supported by cDNA: gi_6683111_dbj_AB0293      | 256150_at   | -2.1 |
| putative protein RING-H2 finger protein RHA1a, Arabidopsis thaliana,AF078683                                                                       | 255802_s_at | -2.1 |
| unknown protein contains similarity to chlorophyllase GI:7415999 from [Chenopodium album]; supported by full-length cDNA: Ceres: 31589.            | 255786_at   | -2.1 |
| putative protein Cyclic beta-1-3-glucan synthase, Bradyrhizobium japonicum, AF047687                                                               | 254773_at   | -2.1 |
| heat shock protein - like heat shock protein 17, Triticum aestivum, PIR1:HHWT17;supported by full-length cDNA: Ceres:23223.                        | 254384_at   | -2.1 |
| putative protein embryo-abundant protein (EMB34), Picea glauca, PID:g1350531                                                                       | 254318_at   | -2.1 |
| putative protein annexin VII, Dictyostelium discoideum, PIR1:LUDO7                                                                                 | 254262_at   | -2.1 |
| putative protein ;supported by full-length cDNA: Ceres:265.                                                                                        | 253172_at   | -2.1 |
| lipid-transfer protein-like protein nonspecific lipid transfer protein, loblolly pine, PIR:S51816;supported by full-length cDNA: Ceres:8461.       | 252711_at   | -2.1 |
| hypothetical protein                                                                                                                               | 252501_at   | -2.1 |
| SF16 -like protein SF16 protein, pollen specific, helianthus annuus, PIR:T13992;supported by full-length cDNA: Ceres:39013.                        | 252280_at   | -2.1 |
| putative protein several hypothetical proteins - Arabidopsis thaliana; supported by cDNA: gi_15010763_gb_AY045683.1_                               | 252098_at   | -2.1 |
| putative protein hypothetical protein At2g41240 - Arabidopsis thaliana, EMBL:AC005662                                                              | 251677_at   | -2.1 |

|                                                                                                                                                                                                                                                 |             |      |
|-------------------------------------------------------------------------------------------------------------------------------------------------------------------------------------------------------------------------------------------------|-------------|------|
| UDP-GlcNAc:dolichol phosphate N-acetylglucosamine-1-phosphate transferase-like protein UDP-GlcNAc:dolichol phosphate N-acetylglucosamine-putative protein prib5, <i>Ribes nigrum</i> , EMBL:RNI7578;supported by full-length cDNA: Ceres:31361. | 251626_at   | -2.1 |
| unknown protein                                                                                                                                                                                                                                 | 251400_at   | -2.1 |
| unknown protein                                                                                                                                                                                                                                 | 250857_at   | -2.1 |
| nucleoid DNA-binding protein cnd41 - like protein nucleoid DNA-binding protein cnd41, chloroplast, common tobacco, PIR:T01996                                                                                                                   | 250445_at   | -2.1 |
| putative protein similar to unknown protein (gb AAB61527.1)                                                                                                                                                                                     | 249727_at   | -2.1 |
| amino acid permease                                                                                                                                                                                                                             | 249346_at   | -2.1 |
| putative protein similar to unknown protein (pir T04427)                                                                                                                                                                                        | 248943_s_at | -2.1 |
| unknown protein                                                                                                                                                                                                                                 | 247878_at   | -2.1 |
| histone H4 - like protein histone H4, <i>Zea mays</i> , PIR:HSZM4;supported by full-length cDNA: Ceres:15418.                                                                                                                                   | 247692_s_at | -2.1 |
| hypothetical protein predicted by genemark.hmm;supported by full-length cDNA: Ceres:124269.                                                                                                                                                     | 245840_at   | -2.1 |
| phosphate/phosphoenolpyruvate translocator - like protein ;supported by full-length cDNA: Ceres:100777.                                                                                                                                         | 245698_at   | -2.1 |
| PSI 9KDa protein                                                                                                                                                                                                                                | 244932_at   | -2.1 |
| unknown protein ; supported by cDNA: gi_16612242_gb_AF439822.1_AF439822                                                                                                                                                                         | 266489_at   | -2   |
| hypothetical protein predicted by genscan and genefinder                                                                                                                                                                                        | 265892_at   | -2   |
| Expressed protein ; supported by full-length cDNA: Ceres: 38093.                                                                                                                                                                                | 265025_at   | -2   |
| Expressed protein ; supported by full-length cDNA: Ceres: 17126.                                                                                                                                                                                | 264725_at   | -2   |
| Expressed protein ; supported by cDNA: gi_13926282_gb_AF372895.1_AF372895                                                                                                                                                                       | 263632_at   | -2   |
| unknown protein                                                                                                                                                                                                                                 | 262970_at   | -2   |
| calcium-dependent protein kinase, putative similar to calcium-dependent protein kinase GB:AAC25423 GI:3283996 [ <i>Nicotiana tabacum</i> ]                                                                                                      | 262671_at   | -2   |
| hypothetical protein predicted by genemark.hmm                                                                                                                                                                                                  | 262151_at   | -2   |
| adenine phosphoribosyltransferase almost identical to adenine phosphoribosyltransferase GI:1402894 from [ <i>Arabidopsis thaliana</i> ]                                                                                                         | 262039_at   | -2   |
| regulatory protein HAL3B similar to GB:AAB53106 from [ <i>Arabidopsis thaliana</i> ]; supported by full-length cDNA: Ceres: 412.                                                                                                                | 261306_at   | -2   |
| hypothetical protein predicted by genemark.hmm                                                                                                                                                                                                  | 260919_at   | -2   |
| flower development protein cycloidea (cyc3), putative similar to flower development protein cycloidea (cyc3) GI:6358611 from [ <i>Misopates orontium</i> ]                                                                                      | 260618_at   | -2   |
| Cyclin, putative similar to GB:CAB77269 from [ <i>Pisum sativum</i> ]                                                                                                                                                                           | 260506_at   | -2   |
| unknown protein supported by cDNA: Ceres:13335                                                                                                                                                                                                  | 260072_at   | -2   |
| hypothetical protein predicted by genefinder                                                                                                                                                                                                    | 259743_at   | -2   |
| rhodanese-like family protein contains rhodanese-like domain PF:00581;supported by full-length cDNA: Ceres:30880.                                                                                                                               | 258989_at   | -2   |
| unknown protein ;supported by full-length cDNA: Ceres:8544.                                                                                                                                                                                     | 256785_at   | -2   |
| unknown protein ;supported by full-length cDNA: Ceres:31357.                                                                                                                                                                                    | 256674_at   | -2   |
| disease resistance protein, putative similar to disease resistance protein RPP1-WsA [ <i>Arabidopsis thaliana</i> ] GI:3860163; supported by full-length cD                                                                                     | 256526_at   | -2   |
| putative protein                                                                                                                                                                                                                                | 255692_at   | -2   |
| cysteine proteinase contains similarity to cysteine proteinase RD21A (thiol protease) GI:435619, SP:P43297 from [ <i>Arabidopsis thaliana</i> ]                                                                                                 | 254915_s_at | -2   |
| acid phosphatase-like protein acid phosphatase-1 (EC 3.1.3.-) - <i>Lycopersicon esculentum</i> ,PIR2:T06587; supported by cDNA: gi_15293022_gb_A                                                                                                | 253731_at   | -2   |
| putative protein                                                                                                                                                                                                                                | 253345_at   | -2   |
| putative auxin-regulated protein auxin-induced protein X15, <i>Glycine max</i> , PIR2:JQ1097;supported by full-length cDNA: Ceres:10510.                                                                                                        | 253255_at   | -2   |
| putative LEA protein <i>Picea glauca</i> late embryogenesis abundant protein (EMB8), PID:g1350545;supported by full-length cDNA: Ceres:36702.                                                                                                   | 252132_at   | -2   |
| syntaxin-like protein synt4 ;supported by full-length cDNA: Ceres:37248.                                                                                                                                                                        | 252053_at   | -2   |
| putative protein multisynthetase complex auxiliary component p43 - <i>Cricetulus griseus</i> , EMBL:AF021800;supported by full-length cDNA: Ceres:280                                                                                           | 251442_at   | -2   |
| putative protein outer envelope membrane protein E 6.7 - chloroplast <i>Spinacia oleracea</i> , PIR:A35958; supported by cDNA: gi_15724349_gb_AF41                                                                                              | 251155_at   | -2   |
| putative protein ;supported by full-length cDNA: Ceres:40252.                                                                                                                                                                                   | 250936_at   | -2   |
| 24-sterol C-methyltransferase ; supported by cDNA: gi_11066104_gb_AF195648.1_AF195648                                                                                                                                                           | 250254_at   | -2   |
| nodulin-like protein                                                                                                                                                                                                                            | 250217_at   | -2   |
| beta-amylase-like proten beta-amylase - <i>Prunus armeniaca</i> , EMBL:AF139501;supported by full-length cDNA: Ceres:30798.                                                                                                                     | 250007_at   | -2   |
| 6-phosphogluconolactonase-like protein ;supported by full-length cDNA: Ceres:13806.                                                                                                                                                             | 249732_at   | -2   |
| pectin acetyltransferase ;supported by full-length cDNA: Ceres:39005.                                                                                                                                                                           | 248968_at   | -2   |
| histone H3 (sp P05203) ; supported by cDNA: gi_13926210_gb_AF370577.1_AF370577                                                                                                                                                                  | 247192_at   | -2   |
| apospory-associated protein C-like                                                                                                                                                                                                              | 247101_at   | -2   |
| hypothetical protein similar to putative disease resistance protein GB:AAC14512 GI:2739389 from [ <i>Arabidopsis thaliana</i> ]                                                                                                                 | 245765_at   | -2   |
| NADH dehydrogenase 49KDa protein                                                                                                                                                                                                                | 244937_at   | -2   |
| putative protein similar to unknown protein (emb CAB67623.1)                                                                                                                                                                                    | 250696_at   | -2   |
| hypothetical protein predicted by genscan and genefinder                                                                                                                                                                                        | 266363_at   | -1.9 |
| beta-expansin ;supported by full-length cDNA: Ceres:109135.                                                                                                                                                                                     | 265443_at   | -1.9 |
| unknown protein similar to hypothetical protein GI:9665091 from [ <i>Arabidopsis thaliana</i> ]                                                                                                                                                 | 264998_at   | -1.9 |
| Expressed protein ; supported by full-length cDNA: Ceres: 2681.                                                                                                                                                                                 | 264096_at   | -1.9 |
| putative s-adenosylmethionine synthetase ;supported by full-length cDNA: Ceres:13320.                                                                                                                                                           | 263838_at   | -1.9 |
| putative beta-ketoacyl-CoA synthase                                                                                                                                                                                                             | 263606_at   | -1.9 |

|                                                                                                                                                                                          |             |      |
|------------------------------------------------------------------------------------------------------------------------------------------------------------------------------------------|-------------|------|
| putative CONSTANS-like B-box zinc finger protein ; supported by cDNA: gi_12698721_gb_AF323666.1_AF323666                                                                                 | 263252_at   | -1.9 |
| hypothetical protein predicted by genemark.hmm                                                                                                                                           | 263126_at   | -1.9 |
| peptide transporter, putative predicted by genemark.hmm; supported by cDNA: gi_15810442_gb_AY056260.1_                                                                                   | 261958_at   | -1.9 |
| acid phosphatase, putative similar to acid phosphatase Gl:5360721 from [Lupinus albus]; supported by cDNA: gi_13605749_gb_AF361856.1_AF361856                                            | 261492_at   | -1.9 |
| hypothetical protein predicted by genemark.hmm; supported by full-length cDNA: Ceres: 268411.                                                                                            | 261351_at   | -1.9 |
| putative ABC transporter similar to ABC transporters: GB:BAA77876 [Escherichia coli], GB:P07655 [Escherichia coli]; contains Pfam profile: PF000                                         | 260002_at   | -1.9 |
| peptide transporter, putative similar to peptide transporter PTR2-B SP:P46032 [Arabidopsis thaliana (Mouse-ear cress)]; supported by full-length cDNA: gi_1430846_gb_AY056286.1_AY056286 | 259839_at   | -1.9 |
| myb-related transcription factor, putative similar to Gl:1430846 from [Lycopersicon esculentum]                                                                                          | 259822_at   | -1.9 |
| Expressed protein ; supported by full-length cDNA: Ceres: 42300.                                                                                                                         | 259603_at   | -1.9 |
| unknown protein ; supported by cDNA: gi_15028026_gb_AY045870.1_                                                                                                                          | 259460_at   | -1.9 |
| jasmonate inducible protein isolog ;supported by full-length cDNA: Ceres:119153.                                                                                                         | 259382_s_at | -1.9 |
| receptor kinase, putative similar to receptor kinase GB:AAA33715 from [Petunia integrifolia];supported by full-length cDNA: Ceres:22221.                                                 | 258159_at   | -1.9 |
| unknown protein ;supported by full-length cDNA: Ceres:7192.                                                                                                                              | 258183_at   | -1.9 |
| unknown protein ; supported by cDNA: gi_15810494_gb_AY056286.1_                                                                                                                          | 257071_at   | -1.9 |
| unknown protein                                                                                                                                                                          | 256577_at   | -1.9 |
| glutamine synthetase, putative similar to glutamine synthetase [Raphanus sativus] Gl:1526564;supported by full-length cDNA: Ceres:2662.                                                  | 256524_at   | -1.9 |
| zinc-finger protein, putative similar to Gl:5262161 from [Arabidopsis thaliana]; supported by cDNA: gi_16323142_gb_AY057675.1_                                                           | 256469_at   | -1.9 |
| RING zinc finger protein contains Pfam profile: PF00097 Zinc finger, C3HC4 type (RING finger)                                                                                            | 256446_at   | -1.9 |
| unknown protein                                                                                                                                                                          | 256262_at   | -1.9 |
| calcium-binding protein, putative similar to calcium-binding protein Gl:6901652 from [Olea europaea];supported by full-length cDNA: Ceres:19462.                                         | 256129_at   | -1.9 |
| transcriptional activator CBF1, putative similar to transcriptional activator CBF1 Gl:1899058 from [Arabidopsis thaliana]                                                                | 255937_at   | -1.9 |
| pEARLI 1-like protein Arabidopsis thaliana pEARLI 1 mRNA, PID:g871780; supported by cDNA: gi_15450470_gb_AY052336.1_                                                                     | 254832_at   | -1.9 |
| extensin-like protein extensin-like protein, Zea mays, PIR2:S49915                                                                                                                       | 254770_at   | -1.9 |
| 1-aminocyclopropane-1-carboxylate synthase - like protein 1-aminocyclopropane-1-carboxylate synthase,Arabidopsis thaliana, S71174; supporter                                             | 253066_at   | -1.9 |
| putative thaumatin-like protein thaumatin-like protein precursor Mdt11, pathogenesis-related - Malus domestica, PID:g3643249;supported by full-length cDNA: gi_15450470_gb_AY052336.1_   | 252954_at   | -1.9 |
| putative protein 24 kDa seed maturation protein, Glycine max., EMBL:AF004806                                                                                                             | 251903_at   | -1.9 |
| putative protein similar to unknown protein (pir T02514);supported by full-length cDNA: Ceres:117347.                                                                                    | 250777_at   | -1.9 |
| putative protein similar to unknown protein (pir T09909)                                                                                                                                 | 250307_at   | -1.9 |
| putative protein S-receptor kinase PK3 precursor, maize, PIR:T02753;supported by full-length cDNA: Ceres:154037.                                                                         | 249983_at   | -1.9 |
| putative protein contains similarity to calmodulin;supported by full-length cDNA: Ceres:99348.                                                                                           | 249197_at   | -1.9 |
| unknown protein ;supported by full-length cDNA: Ceres:31129.                                                                                                                             | 248186_at   | -1.9 |
| putative protein strong similarity to unknown protein (emb CAB89350.1)                                                                                                                   | 247240_at   | -1.9 |
| putative protein similar to unknown protein (emb CAB66910.1);supported by full-length cDNA: Ceres:36946.                                                                                 | 247161_at   | -1.9 |
| RING-H2 zinc finger protein-like RING-H2 zinc finger protein ATL6 - Arabidopsis thaliana, EMBL:AF132016;supported by full-length cDNA: Ceres:1                                           | 246777_at   | -1.9 |
| beta-1,3-glucanase class I precursor ;supported by full-length cDNA: Ceres:3176.                                                                                                         | 245393_at   | -1.9 |
| cysteine proteinase inhibitor like protein ; supported by full-length cDNA: Ceres: 31946.                                                                                                | 245323_at   | -1.9 |
| AR781, similar to yeast pheromone receptor identical to GB:D88743, corrected a frameshift found in the original record (at 69530 bp), sequence su                                        | 245041_at   | -1.9 |
| unknown protein                                                                                                                                                                          | 257381_at   | -1.9 |
| unknown protein                                                                                                                                                                          | 267545_at   | -1.8 |
| putative ammonium transporter                                                                                                                                                            | 267142_at   | -1.8 |
| calcium binding protein (CaBP-22) identical to GB:Z12136;supported by full-length cDNA: Ceres:123659.                                                                                    | 267076_at   | -1.8 |
| hypothetical protein predicted by genefinder                                                                                                                                             | 266774_at   | -1.8 |
| putative CCCH-type zinc finger protein identical to GB:U81238;supported by full-length cDNA: Ceres:39893.                                                                                | 266656_at   | -1.8 |
| unknown protein ;supported by full-length cDNA: Ceres:10986.                                                                                                                             | 266476_at   | -1.8 |
| hypothetical protein predicted by genscan;supported by full-length cDNA: Ceres:8450.                                                                                                     | 266311_at   | -1.8 |
| unknown protein                                                                                                                                                                          | 266157_at   | -1.8 |
| putative beta-1,3-glucanase                                                                                                                                                              | 265377_at   | -1.8 |
| putative RING zinc finger protein ; supported by cDNA: gi_3790572_gb_AF078824.1_AF078824                                                                                                 | 264854_at   | -1.8 |
| sugar carrier protein, putative similar to sugar carrier protein Gl:169735 from [Ricinus communis]                                                                                       | 264482_at   | -1.8 |
| putative NPK1-related protein kinase 2 similar to nitrate chlorate transporter GB:Q05085 from (Arabidopsis thaliana); supported by cDNA: gi_16666                                        | 264348_at   | -1.8 |
| protein kinase, putative Simisimilar to protein kinase 2 Gl:7573598 from [Populus nigra]                                                                                                 | 264240_at   | -1.8 |
| Expressed protein ; supported by full-length cDNA: Ceres: 38277.                                                                                                                         | 264004_at   | -1.8 |
| putative glucosyltransferase ; supported by cDNA: gi_15809993_gb_AY054265.1_                                                                                                             | 263847_at   | -1.8 |
| putative glutaredoxin Strong similarity to gb Z49699 glutaredoxin from Ricinus communis                                                                                                  | 263168_at   | -1.8 |
| glucose transporter almost identical to glucose transporter GB:P23586 from [Arabidopsis thaliana]; supported by full-length cDNA: Ceres: 33727.                                          | 262456_at   | -1.8 |
| unknown protein ;supported by full-length cDNA: Ceres:21798.                                                                                                                             | 262283_at   | -1.8 |
| unknown protein                                                                                                                                                                          | 261981_at   | -1.8 |

|                                                                                                                                                  |             |      |
|--------------------------------------------------------------------------------------------------------------------------------------------------|-------------|------|
| hypothetical protein predicted by genemark.hmm                                                                                                   | 261247_at   | -1.8 |
| unknown protein ; supported by full-length cDNA: Ceres: 100293.                                                                                  | 260877_at   | -1.8 |
| putative FKBP type peptidyl-prolyl cis-trans isomerase                                                                                           | 260542_at   | -1.8 |
| hypothetical protein predicted by genefinder;supported by full-length cDNA: Ceres:99920.                                                         | 260427_at   | -1.8 |
| AP2-containing DNA-binding protein contains Pfam profile: PF00847 AP2 domain                                                                     | 259793_at   | -1.8 |
| putative serine/threonine kinase ; supported by cDNA: gi_15010571_gb_AY045587.1_                                                                 | 259538_at   | -1.8 |
| putative ribose 5-phosphate isomerase identical to putative ribose 5-phosphate isomerase GB:AAD57010 (Arabidopsis thaliana); similar to ribose 5 | 259098_at   | -1.8 |
| unknown protein ; supported by cDNA: gi_15081621_gb_AY048203.1_                                                                                  | 259020_at   | -1.8 |
| cinnamyl alcohol dehydrogenase identical to GB:P48523 from [Arabidopsis thaliana];supported by full-length cDNA: Ceres:4357.                     | 258023_at   | -1.8 |
| unknown protein contains similarity to auxin-induced protein GB:P33082 from [Glycine max]                                                        | 257690_at   | -1.8 |
| unknown protein ; supported by full-length cDNA: Ceres: 105122.                                                                                  | 257300_at   | -1.8 |
| hypothetical protein predicted by genscan; supported by cDNA: gi_15292884_gb_AY050876.1_                                                         | 257057_at   | -1.8 |
| calmodulin, putative similar to GB:P07463 from [Paramecium tetraurelia] (Cell 62 (1), 165-174 (1990))                                            | 256755_at   | -1.8 |
| unknown protein ; supported by cDNA: gi_15293280_gb_AY051074.1_                                                                                  | 256266_at   | -1.8 |
| receptor protein kinase, putative contains Pfam profiles: PF00069: Eukaryotic protein kinase domain, multiple PF00560: Leucine Rich Repeat       | 256168_at   | -1.8 |
| leucine zipper protein, putative similar to leucine zipper protein GI:10177020 from [Arabidopsis thaliana]                                       | 256050_at   | -1.8 |
| putative protein A. thaliana hypothetical protein F1N20.70, GenBank accession number AL022140;supported by full-length cDNA: Ceres:118778.       | 255285_at   | -1.8 |
| Expressed protein ; supported by full-length cDNA: Ceres: 42850.                                                                                 | 254609_at   | -1.8 |
| putative protein AR411 - Arabidopsis thaliana (thale cress), PID:g1669603; supported by cDNA: gi_13507100_gb_AF272748.1_AF272748                 | 254231_at   | -1.8 |
| putative protein ;supported by full-length cDNA: Ceres:16463.                                                                                    | 254103_at   | -1.8 |
| nucleotide pyrophosphatase -like protein nucleotide pyrophosphatase, Oryza sativa, gb:T03293; supported by cDNA: gi_13430713_gb_AF360269.        | 253697_at   | -1.8 |
| putative pollen allergen pollen allergen - Pinus radiata, PID:g2935527; supported by cDNA: gi_14190354_gb_AF378855.1_AF378855                    | 252997_at   | -1.8 |
| putative chloroplast prephenate dehydratase similar to bacterial PheA gene products                                                              | 252652_at   | -1.8 |
| histone H2B ;supported by full-length cDNA: Ceres:32930.                                                                                         | 252561_at   | -1.8 |
| receptor protein kinase - like protein CLAVATA1 receptor kinase, Arabidopsis thaliana, EMBL:ATU96879                                             | 252272_at   | -1.8 |
| 3-isopropylmalate dehydratase-like protein (small subunit) 3-isopropylmalate dehydratase, small subunit - Thermotoga maritima, PIR:A72363        | 251524_at   | -1.8 |
| transport protein subunit - like S61B_ARATH PROTEIN TRANSPORT PROTEIN SEC61 BETA SUBUNIT, Arabidopsis thaliana, SWISSPROT:S61                    | 251422_at   | -1.8 |
| unknown protein ;supported by full-length cDNA: Ceres:7709.                                                                                      | 251395_at   | -1.8 |
| putative protein prenylated rab acceptor 1 - Homo sapiens, EMBL:AF112202;supported by full-length cDNA: Ceres:22460.                             | 250663_at   | -1.8 |
| Expressed protein ; supported by full-length cDNA: Ceres: 252311.                                                                                | 250537_at   | -1.8 |
| unknown protein ; supported by cDNA: gi_14190364_gb_AF378860.1_AF378860                                                                          | 250099_at   | -1.8 |
| auxin-induced protein-like                                                                                                                       | 250012_x_at | -1.8 |
| serine carboxypeptidase II-like protein                                                                                                          | 249847_at   | -1.8 |
| putative protein contains similarity to photomorphogenesis repressor protein; supported by cDNA: gi_14532633_gb_AY039941.1_                      | 249798_at   | -1.8 |
| UDP-glucose dehydrogenase-like protein UDP-glucose dehydrogenase - Glycine max, EMBL:U53418                                                      | 249469_at   | -1.8 |
| putative protein contains similarity to DNA-3-methyladenine glycosylase ;supported by full-length cDNA: Ceres:29551.                             | 249008_at   | -1.8 |
| putative protein contains similarity to FKBP-type peptidyl-prolyl cis-trans isomerase                                                            | 248962_at   | -1.8 |
| GDSL-motif lipase/hydrolase-like protein ;supported by full-length cDNA: Ceres:18389.                                                            | 248912_at   | -1.8 |
| putative protein similar to unknown protein (pir T05562); supported by full-length cDNA: Ceres: 158397.                                          | 248551_at   | -1.8 |
| putative protein contains similarity to ethylene responsive element binding factor;supported by full-length cDNA: Ceres:2347.                    | 248448_at   | -1.8 |
| putative protein contains similarity to 40S ribosomal protein S10;supported by full-length cDNA: Ceres:91769.                                    | 248331_at   | -1.8 |
| 1,4-benzoquinone reductase-like; Trp repressor binding protein-like                                                                              | 248162_at   | -1.8 |
| putative protein various predicted proteins, Arabidopsis thaliana;supported by full-length cDNA: Ceres:28528.                                    | 246860_at   | -1.8 |
| copper amine oxidase, putative similar to copper amine oxidase GI:3819099 from [Cicer arietinum]                                                 | 246603_at   | -1.8 |
| beta-D-glucan exohydrolase - like protein beta-D-glucan exohydrolase, Nicotiana tabacum, EMBL:AB017502                                           | 246184_at   | -1.8 |
| putative protein retinal glutamic acid-rich protein, bovine, PIR:A40437;supported by full-length cDNA: Ceres:24151.                              | 246108_at   | -1.8 |
| phytochrome kinase substrate 1 - like protein                                                                                                    | 245696_at   | -1.8 |
| Expressed protein ; supported by full-length cDNA: Ceres: 21980.                                                                                 | 245642_at   | -1.8 |
| F12A21.7 hypothetical protein;supported by full-length cDNA: Ceres:34552.                                                                        | 245197_at   | -1.8 |
| putative WRKY-type DNA-binding protein ; supported by cDNA: gi_13506742_gb_AF224704.1_AF224704                                                   | 245051_at   | -1.8 |
| PSII K protein                                                                                                                                   | 245050_at   | -1.8 |
| carboxyltransferase beta subunit                                                                                                                 | 245016_at   | -1.8 |
| unknown protein ;supported by full-length cDNA: Ceres:8081.                                                                                      | 256793_at   | -1.8 |
| unknown protein                                                                                                                                  | 267055_at   | -1.7 |
| putative phosphomannomutase ;supported by full-length cDNA: Ceres:998.                                                                           | 266928_at   | -1.7 |
| putative sugar transporter ;supported by full-length cDNA: Ceres:114959.                                                                         | 265768_at   | -1.7 |
| putative phosphatidic acid phosphatase ;supported by full-length cDNA: Ceres:19163.                                                              | 265737_at   | -1.7 |

|                                                                                                                                                      |             |      |
|------------------------------------------------------------------------------------------------------------------------------------------------------|-------------|------|
| unknown protein ;supported by full-length cDNA: Ceres:1697.                                                                                          | 265716_at   | -1.7 |
| putative caltractin ;supported by full-length cDNA: Ceres:7802.                                                                                      | 265460_at   | -1.7 |
| putative glycosyl transferase similar to GB:AACT78704                                                                                                | 264857_at   | -1.7 |
| putative lipase Similar to nodulins and lipase; location of EST E6C2T7 , gb AA042309. similar to nodulins gj 3328240, gj 2129854 and others and li   | 264501_at   | -1.7 |
| hypothetical protein predicted by genscan; supported by cDNA: gi_13937239_gb_AF372975.1_AF372975                                                     | 264434_at   | -1.7 |
| putative leucine-rich repeat disease resistance protein ;supported by full-length cDNA: Ceres:20900.                                                 | 263330_at   | -1.7 |
| hypothetical protein similar to putative transporter GI:6598860 from [Arabidopsis thaliana]                                                          | 262935_at   | -1.7 |
| unknown protein                                                                                                                                      | 262868_at   | -1.7 |
| delta 9 desaturase identical to delta 9 desaturase GB:BAA25180 GI:2970034 from [Arabidopsis thaliana]; supported by full-length cDNA: Ceres: 100     | 260957_at   | -1.7 |
| putative helix-loop-helix DNA-binding protein contains Pfam profile: PF00010 Helix-loop-helix DNA-binding domain                                     | 260070_at   | -1.7 |
| putative calmodulin similar to calmodulin GB:P02596 [Renilla reniformis]; contains Pfam profile: PF00036 EF hand (4 copies);supported by full-length | 260076_at   | -1.7 |
| phosphatidylinositol synthase (PIS1) identical to phosphatidylinositol synthase (PIS1) GB:AJ000539;supported by full-length cDNA: Ceres:34210.       | 260006_at   | -1.7 |
| unknown protein ;supported by full-length cDNA: Ceres:29624.                                                                                         | 259979_at   | -1.7 |
| putative transcription factor similar to myb-related transcription factor 24 GB:S71287;supported by full-length cDNA: Ceres:31592.                   | 259751_at   | -1.7 |
| putative signal peptidase similar to MITOCHONDRIAL INNER MEMBRANE PROTEASE SUBUNIT 2 GB:P46972 [Saccharomyces cerevisiae]                            | 259199_at   | -1.7 |
| class 2 non-symbiotic hemoglobin identical to class 2 non-symbiotic hemoglobin GB:AAB82770 [Arabidopsis thaliana]; supported by full-length cDN      | 258920_at   | -1.7 |
| putative MYB-related protein similar to MYB-related protein GB:CAA73305                                                                              | 258723_at   | -1.7 |
| putative oxidoreductase similar to phytoene desaturase GB:P28553 from [Glycine max];supported by full-length cDNA: Ceres:17350.                      | 258708_at   | -1.7 |
| hypothetical protein similar to auxin-induced proteins GB:P33083, GB:P33082 [Glycine max]                                                            | 258653_at   | -1.7 |
| hypothetical protein predicted by genscan+;supported by full-length cDNA: Ceres:262487.                                                              | 258551_at   | -1.7 |
| unknown protein                                                                                                                                      | 258100_at   | -1.7 |
| dihydroliipoamide S-acetyltransferase identical to GB:AAD55139 from [Arabidopsis thaliana]; supported by cDNA: gi_14335165_gb_AY037262.1_            | 258086_at   | -1.7 |
| hypothetical protein ; supported by full-length cDNA: Ceres: 107260.                                                                                 | 256383_at   | -1.7 |
| Expressed protein ; supported by full-length cDNA: Ceres: 11615.                                                                                     | 256091_at   | -1.7 |
| glycine hydroxymethyltransferase - like protein glycine hydroxymethyltransferase, Homo sapiens, PIR2:A46746                                          | 254740_s_at | -1.7 |
| beta-1,3-glucanase-like protein strong similarity to endo-beta-1,3-beta-D-glucosidase, Nicotiana tabacum, PIR2:S46495                                | 254665_at   | -1.7 |
| cytochrome P450 - like protein flavonoid 3',5'-hydroxylase Hf1, Petunia x hybrida, PIR2:S38985                                                       | 254331_s_at | -1.7 |
| serine threonine kinase - like protein Ki domain interacting kinase 1 (KIK1), Zea mays; supported by cDNA: gi_13506746_gb_AF224706.1_AF2247          | 254265_s_at | -1.7 |
| putative protein extensin, Catharanthus roseus, D86853                                                                                               | 254093_at   | -1.7 |
| low temperature and salt responsive protein homolog low temperature and salt responsive protein LT16A - Arabidopsis thaliana,PID:g4039153            | 253627_at   | -1.7 |
| pectinesterase - like protein pectinesterase, Prunus persica, X95991; supported by cDNA: gi_14190428_gb_AF378892.1_AF378892                          | 253372_at   | -1.7 |
| putative protein hydroxyproline-rich glycoprotein precursor, Nicotiana tabacum, PIR2:S06733; supported by cDNA: gi_15724315_gb_AF412098.1_           | 253284_at   | -1.7 |
| amidophosphoribosyltransferase 2 precursor                                                                                                           | 253252_at   | -1.7 |
| vacuolar H <sup>+</sup> -transporting ATPase 16K chain ;supported by full-length cDNA: Ceres:24998.                                                  | 253200_at   | -1.7 |
| putative protein AT.I.24-7, Arabidopsis thaliana, gb:U63815                                                                                          | 253215_at   | -1.7 |
| hypothetical protein supported by full-length cDNA: Ceres:21166.                                                                                     | 252877_at   | -1.7 |
| R2R3-MYB transcription factor ; supported by cDNA: gi_15983427_gb_AF424588.1_AF424588                                                                | 252193_at   | -1.7 |
| uracil phosphoribosyltransferase-like protein uracil phosphoribosyltransferase - Nicotiana tabacum, PIR:T03969;supported by full-length cDNA: Cer    | 251920_at   | -1.7 |
| nucleoid DNA-binding - like protein nucleoid DNA-binding protein cnd41, chloroplast, common tobacco, PIR:T01996; supported by full-length cDNA       | 251899_at   | -1.7 |
| putative protein                                                                                                                                     | 251727_at   | -1.7 |
| responce reactor 4 ; supported by cDNA: gi_3273201_dbj_AB010918.1_AB010918                                                                           | 251665_at   | -1.7 |
| beta-1,3-glucanase 2 (BG2) (PR-2) ;supported by full-length cDNA: Ceres:21719.                                                                       | 251625_at   | -1.7 |
| LAX1 / AUX1 -like permease                                                                                                                           | 251133_at   | -1.7 |
| putative protein predicted proteins in castor bean, Arabidopsis thaliana and alfalfa.; supported by full-length cDNA: Ceres: 25522.                  | 250366_at   | -1.7 |
| putative protein predicted protein, Arabidopsis thaliana                                                                                             | 250168_at   | -1.7 |
| proline-rich protein predicted protein F24P17.17 - Arabidopsis thaliana, EMBL:AC011623                                                               | 250002_at   | -1.7 |
| putative protein similar to unknown protein (embjCAB89401.1)                                                                                         | 249071_at   | -1.7 |
| zinc finger protein Zat12 ; supported by full-length cDNA: Ceres:40576.                                                                              | 247655_at   | -1.7 |
| structural protein - like glycine-rich cell wall structural protein 1 precursor, Oryza sativa, PIR:KNRZG1;supported by full-length cDNA: Ceres:9324. | 247541_at   | -1.7 |
| putative protein similar to unknown protein (embjCAB62301.1)                                                                                         | 247030_at   | -1.7 |
| putative protein similar to unknown protein (pir T08445);supported by full-length cDNA: Ceres:11651.                                                 | 246952_at   | -1.7 |
| transmembrane protein FT27/PFT27-like ;supported by full-length cDNA: Ceres:12993.                                                                   | 246619_at   | -1.7 |
| acetyltransferase-like protein Glucosamine-6-phosphate acetyltransferase EMeg32 protein - Mus musculus, EMBL:AJ001006                                | 246518_at   | -1.7 |
| S-adenosylmethionine decarboxylase (adoMetDC2) ; supported by cDNA: gi_16930682_gb_AF436825.1_AF436825                                               | 246490_at   | -1.7 |
| NAM-like protein hypothetical protein SENU5, senescence up-regulated - Lycopersicon esculentum, EMBL:Z75524; supported by cDNA: gi_14326             | 245987_at   | -1.7 |
| hypothetical protein predicted by genemark.hmm                                                                                                       | 245771_at   | -1.7 |
| ATP-sulfurylase ; supported by cDNA: gi_459143_gb_U06275.1_ATU06275                                                                                  | 245254_at   | -1.7 |

|                                                                                                                                                       |             |      |
|-------------------------------------------------------------------------------------------------------------------------------------------------------|-------------|------|
| ATPase I subunit                                                                                                                                      | 245025_at   | -1.7 |
| hypothetical protein predicted by genefinder; supported by cDNA: gi_14334633_gb_AY034990.1_                                                           | 267279_at   | -1.6 |
| actin 3 identical to GB:U29480;supported by full-length cDNA: Ceres:19581.                                                                            | 267175_s_at | -1.6 |
| expressed protein supported by cDNA: Ceres:16674; supported by cDNA: gi_13878170_gb_AF370348.1_AF370348                                               | 267038_at   | -1.6 |
| putative auxin transport protein ; supported by cDNA: gi_7109714_gb_AF087016.1_AF087016                                                               | 266300_at   | -1.6 |
| unknown protein ; supported by full-length cDNA: Ceres: 1517.                                                                                         | 265416_at   | -1.6 |
| putative sulphate transporter protein strongly similar to GB:BAA75015, location of EST gb W43788 and gb N96564; supported by cDNA: gi_457991          | 264901_at   | -1.6 |
| unknown protein similar to ESTs gb AA605440 and gb H37232;supported by full-length cDNA: Ceres:30716.                                                 | 264834_at   | -1.6 |
| unknown protein Location of EST gb T45589;supported by full-length cDNA: Ceres:145854.                                                                | 264523_at   | -1.6 |
| NAM (no apical meristem)-like protein similar to petunia NAM (X92205) and A. thaliana sequences ATAF1 (X74755) and ATAF2 (X74756); probablk           | 263584_at   | -1.6 |
| putative cytochrome P450 monooxygenase identical to gb X97864 cytochrome P450 from Arabidopsis thaliana and is a member of the PF 00067 C             | 262793_at   | -1.6 |
| AMP-binding protein, putative contains Pfam profile: PF00501 AMP-binding enzyme                                                                       | 262698_at   | -1.6 |
| hypothetical protein similar to hypothetical protein GB:CAB36801 GI:4455265 from [Arabidopsis thaliana]; supported by full-length cDNA: Ceres: 40     | 262457_at   | -1.6 |
| Expressed protein ; supported by full-length cDNA: Ceres: 102374.                                                                                     | 262290_at   | -1.6 |
| Expressed protein ; supported by full-length cDNA: Ceres: 102054.                                                                                     | 262286_at   | -1.6 |
| AP2 domain containing protein, putative similar to AP2 domain containing protein RAP2.1 GI:2281627 from [Arabidopsis thaliana]                        | 262211_at   | -1.6 |
| pectinesterase, putative similar to pectinesterase GI:1944574 from [Lycopersicon esculentum]; supported by cDNA: gi_15982770_gb_AY057492.1            | 261728_at   | -1.6 |
| unknown protein                                                                                                                                       | 261175_at   | -1.6 |
| 2,4-D inducible glutathione S-transferase, putative similar to 2,4-D inducible glutathione S-transferase GI:2920666 from [Glycine max];supported by   | 260745_at   | -1.6 |
| integral membrane protein, putative similar to GB:U43629 from [Beta vulgaris] (Plant Physiol. 110 110 (2), 511-520 (1996)); supported by cDNA: gi     | 260676_at   | -1.6 |
| ACC oxidase, putative similar to ACC oxidase GI:587086 from [Brassica oleracea]; supported by cDNA: gi_15028038_gb_AY045876.1_                        | 260637_at   | -1.6 |
| Expressed protein ; supported by cDNA: gi_15294273_gb_AF410328.1_AF410328                                                                             | 260601_at   | -1.6 |
| hypothetical protein predicted by genefinder                                                                                                          | 260522_x_at | -1.6 |
| calmodulin-related protein similar to GB:P25070 from [Arabidopsis thaliana], contains Pfam profile: PF00036 EF hand (4 copies);supported by full-l    | 260135_at   | -1.6 |
| unknown protein ; supported by cDNA: gi_13937162_gb_AF372935.1_AF372935                                                                               | 259665_at   | -1.6 |
| hypothetical protein predicted by genemark.hmm                                                                                                        | 259398_at   | -1.6 |
| putative methionine synthase similar to cobalamin-independent methionine synthase GB:AAC50037 [Arabidopsis thaliana];supported by full-length         | 259343_s_at | -1.6 |
| unknown protein HMM hit: 2Fe-2S iron-sulfur cluster binding domain;supported by full-length cDNA: Ceres:29120.                                        | 259016_at   | -1.6 |
| putative 40S ribosomal protein S17 similar to 40S ribosomal protein S17 GB:AAD50774 [Lycopersicon esculentum];supported by full-length cDNA: i        | 258922_at   | -1.6 |
| hypothetical protein predicted by genefinder;supported by full-length cDNA: Ceres:8992.                                                               | 258792_at   | -1.6 |
| putative RING zinc finger protein similar to RING-H2 zinc finger protein ATL6 GB:AAD33584 from [Arabidopsis thaliana];supported by full-length cD     | 258436_at   | -1.6 |
| putative signal peptidase 21kDa subunit similar to signal peptidase 21kDa subunit GB:BAA76439 [Rattus norvegicus]; contains Pfam profile: PF004       | 258276_at   | -1.6 |
| putative delta 9 desaturase similar to delta 9 desaturase GB:BAA25180 [Arabidopsis thaliana];supported by full-length cDNA: Ceres:25205.              | 258250_at   | -1.6 |
| Cdc45-like protein similar to Cdc45 GB:AAC67520 [Xenopus laevis] (EMBO J. 17, 5699-5707 (1998)) (required for the initiation of eukaryotic DNA        | 257813_at   | -1.6 |
| sugar transport, putative similar to D-XYLOSE-PROTON SYMPORTER GB:O52733 from [Lactobacillus brevis]                                                  | 257805_at   | -1.6 |
| hypothetical protein predicted by genscan+;supported by full-length cDNA: Ceres:35773.                                                                | 257600_at   | -1.6 |
| unknown protein ;supported by full-length cDNA: Ceres:35218.                                                                                          | 256522_at   | -1.6 |
| RNA-binding protein similar to GI:829254 from [Arabidopsis thaliana]                                                                                  | 256419_at   | -1.6 |
| guanine nucleotide-binding protein, putative similar to guanine nucleotide-binding protein GI:9294068 from [Arabidopsis thaliana]; supported by full- | 256144_at   | -1.6 |
| predicted protein ; supported by cDNA: gi_15027984_gb_AY045849.1_                                                                                     | 256093_at   | -1.6 |
| UDP-glucose glucosyltransferase identical to UDP-glucose glucosyltransferase GI:3928543 from [Arabidopsis thaliana]; supported by cDNA: gi_12C        | 255942_at   | -1.6 |
| putative YABBY3 axial regulator ; supported by cDNA: gi_14335013_gb_AY037186.1_                                                                       | 255709_at   | -1.6 |
| growth factor like protein antisense basic fibroblast growth factor GFG - Rattus norvegicus, PID:g1518635;supported by full-length cDNA: Ceres:14     | 254784_at   | -1.6 |
| calcium-binding protein - like calcium-binding protein, Solanum tuberosum, gb:L02830                                                                  | 254487_at   | -1.6 |
| putative dihydrolipoamide succinyltransferase dihydrolipoamide succinyltransferase (EC 2.3.1.61) precursor - rat, Pir2:A41015;supported by full-len   | 253950_at   | -1.6 |
| hypothetical protein ;supported by full-length cDNA: Ceres:18040.                                                                                     | 253817_at   | -1.6 |
| hypothetical protein                                                                                                                                  | 253367_at   | -1.6 |
| putative protein ;supported by full-length cDNA: Ceres:15747.                                                                                         | 252821_at   | -1.6 |
| serine/proline-rich protein                                                                                                                           | 252615_at   | -1.6 |
| putative protein pectinesterase - Arabidopsis thaliana, PIR:S51370; supported by cDNA: gi_14517535_gb_AY039603.1_                                     | 252406_at   | -1.6 |
| protein translocation complex sec61 gamma chain-like protein protein translocation complex sec61 gamma chain, endoplasmic reticulum - Canis lu        | 252324_at   | -1.6 |
| putative protein EREBP-3 homolog, Stylosanthes hamata, EMBL:U91982; supported by cDNA: gi_15010555_gb_AY045579.1_                                     | 252214_at   | -1.6 |
| UTP-glucose glucosyltransferase - like protein UTP-glucose glucosyltransferase, Manihot esculenta, PIR:S41951; supported by cDNA: gi_1514627          | 252183_at   | -1.6 |
| phenylalanine ammonia-lyase ;supported by full-length cDNA: Ceres:110886.                                                                             | 251984_at   | -1.6 |
| putative protein similar to unknown protein (gb AAF01528.1)                                                                                           | 250796_at   | -1.6 |
| asparaginase ; supported by cDNA: gi_14517439_gb_AY039555.1_                                                                                          | 250547_at   | -1.6 |
| putative protein KIAA0255 gene, Homo sapiens, EMBL:HSD444                                                                                             | 250422_at   | -1.6 |

|                                                                                                                                                        |             |      |
|--------------------------------------------------------------------------------------------------------------------------------------------------------|-------------|------|
| histone H2B like protein (emb)CAA69025.1)                                                                                                              | 249916_at   | -1.6 |
| putative protein similar to unknown protein (gb AAD29063.1)                                                                                            | 249777_at   | -1.6 |
| Expressed protein ; supported by full-length cDNA: Ceres: 32450.                                                                                       | 249719_at   | -1.6 |
| putative protein predicted proteins, Arabidopsis thaliana;supported by full-length cDNA: Ceres:249321.                                                 | 249422_at   | -1.6 |
| tubulin beta-4 chain (sp P24636) ; supported by cDNA: gi_14334935_gb_AY035141.1_                                                                       | 249049_at   | -1.6 |
| putative protein similar to unknown protein (pir T04792)                                                                                               | 248085_at   | -1.6 |
| pectate lyase ; supported by cDNA: gi_16648839_gb_AY058197.1_                                                                                          | 247377_at   | -1.6 |
| adenylate kinase ;supported by full-length cDNA: Ceres:13667.                                                                                          | 247382_at   | -1.6 |
| transcription factor Hap5a-like protein                                                                                                                | 247388_s_at | -1.6 |
| 2-oxoglutarate/malate translocator ; supported by cDNA: gi_15810580_gb_AY056329.1_                                                                     | 247289_at   | -1.6 |
| 60S ribosomal protein L26 ;supported by full-length cDNA: Ceres:2561.                                                                                  | 247010_at   | -1.6 |
| putative protein ;supported by full-length cDNA: Ceres:39563.                                                                                          | 245981_at   | -1.6 |
| putative protein predicted proteins, Arabidopsis thaliana;supported by full-length cDNA: Ceres:19897.                                                  | 246000_at   | -1.6 |
| Expressed protein ; supported by full-length cDNA: Ceres: 6580.                                                                                        | 245336_at   | -1.6 |
| hypothetical protein                                                                                                                                   | 245018_at   | -1.6 |
| ribosomal protein L16                                                                                                                                  | 244983_at   | -1.6 |
| putative cytochrome b5                                                                                                                                 | 267544_at   | -1.5 |
| MADS-box protein (AGL20) ; supported by full-length cDNA: Ceres: 5467.                                                                                 | 267509_at   | -1.5 |
| 60S acidic ribosomal protein P0                                                                                                                        | 267349_at   | -1.5 |
| expressed protein supported by full-length cDNA: Ceres:3350                                                                                            | 266950_at   | -1.5 |
| ribonuclease, RNS1 identical to ribonuclease SP:P42813, GI:561998 from [Arabidopsis thaliana]; supported by full-length cDNA: Ceres:27242.             | 266743_at   | -1.5 |
| putative chorismate mutase/prephenate dehydratase ;supported by full-length cDNA: Ceres:37739.                                                         | 266257_at   | -1.5 |
| unknown protein ;supported by full-length cDNA: Ceres:31665.                                                                                           | 265670_s_at | -1.5 |
| unknown protein                                                                                                                                        | 265411_at   | -1.5 |
| hypothetical protein contains similarity to MHC class II antigen GI:9502037 from [Aotus nancymaae];supported by full-length cDNA: Ceres:1542.          | 265001_at   | -1.5 |
| unknown protein ; supported by full-length cDNA: Ceres: 270281.                                                                                        | 264342_at   | -1.5 |
| unknown protein similar to PHZF, catalyzing the hydroxylation of phenazine-1-carboxylic acid to2-hydroxy-phenazine-1-carboxylic acid; ESTs gb H:       | 264355_at   | -1.5 |
| putative auxin-regulated protein                                                                                                                       | 264014_at   | -1.5 |
| unknown protein ;supported by full-length cDNA: Ceres:24255.                                                                                           | 263901_at   | -1.5 |
| ABC transporter, putative similar to ABC transporter GI:9279716 from [Arabidopsis thaliana]                                                            | 262899_at   | -1.5 |
| NADPH-dependent codeinone reductase, putative similar to NADPH-dependent codeinone reductase GI:6478210 from [Papaver somniferum]; sup                 | 262913_at   | -1.5 |
| hypothetical protein predicted by genemark.hmm; supported by full-length cDNA: Ceres: 19759.                                                           | 262878_at   | -1.5 |
| unknown protein strong similarity to gi 3367522 F8K4.9 from Arabidopsis thaliana BAC gb AC004392. EST gb W43487 comes from this gene                   | 262813_at   | -1.5 |
| receptor kinase (CLV1) identical to receptor kinase (CLV1) GB:AAB58929 GI:2160756 [Arabidopsis thaliana]                                               | 262728_at   | -1.5 |
| ribonuclease contains similarity to RNase GI:7768564 from [Nicotiana tabacum]                                                                          | 262657_at   | -1.5 |
| unknown protein Contains a PF 00175 Oxidoreductase FAD/NADH-binding domain. ESTs gb H76345 and gb AA651465 come from this gene; supp                   | 262572_at   | -1.5 |
| virus resistance protein, putative similar to virus resistance protein GI:558886 from [Nicotiana glutinosa]                                            | 262381_at   | -1.5 |
| hypothetical protein similar to hypothetical protein GI:9294146 from [Arabidopsis thaliana]                                                            | 262236_at   | -1.5 |
| hypothetical protein predicted by genemark.hmm;supported by full-length cDNA: Ceres:1094.                                                              | 262259_s_at | -1.5 |
| hypothetical protein predicted by genemark.hmm                                                                                                         | 262009_at   | -1.5 |
| dirigent protein, putative similar to dirigent protein GI:6694693 from [ Forsythia intermedia]                                                         | 261914_at   | -1.5 |
| Expressed protein ; supported by full-length cDNA: Ceres: 19170.                                                                                       | 261488_at   | -1.5 |
| O-methyltransferase, putative similar to GB:AAF28353 from [Fragaria x ananassa];supported by full-length cDNA: Ceres:101583.                           | 261453_at   | -1.5 |
| 14-3-3 protein GF14omega (grf2) identical to GF14omega isoform GI:487791 from [Arabidopsis thaliana];supported by full-length cDNA: Ceres:252:         | 260775_at   | -1.5 |
| hypothetical protein predicted by genscan+                                                                                                             | 260167_at   | -1.5 |
| unknown protein                                                                                                                                        | 260081_at   | -1.5 |
| unknown protein ; supported by full-length cDNA: Ceres: 14237.                                                                                         | 259909_at   | -1.5 |
| auxin-induced protein, putative similar to SP:P33083 from [Glycine max];supported by full-length cDNA: Ceres:147801.                                   | 259787_at   | -1.5 |
| short chain alcohol dehydrogenase, putative similar to GI:2739279 from [Nicotiana tabacum] (Plant Mol. Biol. 29 (5), 1027-1038 (1995))                 | 259669_at   | -1.5 |
| unknown protein ;supported by full-length cDNA: Ceres:17545.                                                                                           | 259474_at   | -1.5 |
| unknown protein ;supported by full-length cDNA: Ceres:38495.                                                                                           | 258606_at   | -1.5 |
| unknown protein very similar to unknown protein GB:AAC39468 from [Arabidopsis thaliana]; supported by cDNA: gi_14335087_gb_AY037223.1_                 | 258402_at   | -1.5 |
| putative pectin methyltransferase similar to pectin methyltransferase GB:Q42534 from [Arabidopsis thaliana];supported by full-length cDNA: Ceres:13261 | 258369_at   | -1.5 |
| unknown protein ; supported by cDNA: gi_16974601_gb_AY060578.1_                                                                                        | 258244_at   | -1.5 |
| cytochrome P450, putative contains Pfam profile: PF00067 cytochrome P450                                                                               | 257623_at   | -1.5 |
| polygalacturonase, putative similar to endopolygalacturonase GB:225933 from [Lycopersicon esculentum];supported by full-length cDNA: Ceres:17          | 257651_at   | -1.5 |
| proline oxidase, mitochondrial precursor (osmotic stress-induced proline dehydrogenase) identical to GB:P92983 from [Arabidopsis thaliana] (Plant      | 257315_at   | -1.5 |



|                                                                                                                                                  |           |      |
|--------------------------------------------------------------------------------------------------------------------------------------------------|-----------|------|
| hypothetical protein contains similarity to flavonol synthase (FLS) GB:Q41452 from [Solanum tuberosum], contains Pfam profile: PF00671 Iron/Asc  | 256922_at | -1.5 |
| unknown protein                                                                                                                                  | 256828_at | -1.5 |
| unknown protein                                                                                                                                  | 256337_at | -1.5 |
| 12-oxophytodienoate reductase, putative similar to 12-oxophytodienoate reductase OPR1 GI:3882355 from [Arabidopsis thaliana]                     | 255895_at | -1.5 |
| putative protein ; supported by cDNA: gi_14596204_gb_AY042890.1_                                                                                 | 254705_at | -1.5 |
| reticuline oxidase-like protein reticuline oxidase, Eschscholzia californica, PIR:A41533; supported by cDNA: gi_15983492_gb_AF424621.1_AF424     | 254432_at | -1.5 |
| V-ATPase subunit G (vag2 gene)                                                                                                                   | 254216_at | -1.5 |
| possible apospory-associated like protein Pennisetum ciliare possible apospory-associated mRNA clone pSUB C, PID:g549984;supported by full-le    | 254040_at | -1.5 |
| putative protein ; supported by cDNA: gi_15810482_gb_AY056280.1_                                                                                 | 253925_at | -1.5 |
| putative protein LEDI-3 protein, Lithospermum erythrorhizon                                                                                      | 253909_at | -1.5 |
| histone H2A-like protein histone H2A.4, Triticum aestivum, PIR2:S53521; supported by full-length cDNA: Ceres: 927.                               | 253920_at | -1.5 |
| photosystem II protein W - like photosystem II protein W, Porphyra purpurea, PIR2:S73268; supported by full-length cDNA: Ceres: 2419.            | 253790_at | -1.5 |
| Proline-rich APG - like protein proline-rich protein APG, Arabidopsis thaliana, PIR2:S21961;supported by full-length cDNA: Ceres:324.            | 253736_at | -1.5 |
| putative protein (fragment) calcineurin B, Naegleria gruberi, gb;U04380                                                                          | 253412_at | -1.5 |
| putative protein dihydrokaempferol 4-reductase (EC 1.1.1.219) -Synchocystis, PIR2:S75325; supported by cDNA: gi_13926212_gb_AF370578.1_          | 253334_at | -1.5 |
| Expressed protein ; supported by full-length cDNA: Ceres: 22456.                                                                                 | 252823_at | -1.5 |
| putative protein pectinesterase homolog - Pinus radiata,PIR2:T08112                                                                              | 252437_at | -1.5 |
| Expressed protein ; supported by cDNA: gi_16323485_gb_AY059131.1_                                                                                | 252328_at | -1.5 |
| putative protein various predicted proteins, Brassica rapa, Arabidopsis thaliana;supported by full-length cDNA: Ceres:26538.                     | 251013_at | -1.5 |
| RIBOSOMAL PROTEIN S28-like ribosomal protein S28, Arabidopsis thaliana, EMBL:ATRP28A                                                             | 250895_at | -1.5 |
| ubiquinol-cytochrome C reductase complex ubiquinone-binding protein (QP-C)-like protein (gb)AAF19563.1)                                          | 250800_at | -1.5 |
| transcription factor-like protein ethylene responsive element binding factor 5 - Arabidopsis thaliana, EMBL:AB008107; supported by cDNA: gi_1552 | 250582_at | -1.5 |
| myo-inositol-1-phosphate synthase -like protein myo-inositol-1-phosphate synthase, Nicotiana paniculata, EMBL:AB032073                           | 250471_at | -1.5 |
| AtAGP4 ; supported by cDNA: gi_13926257_gb_AF372885.1_AF372885                                                                                   | 250437_at | -1.5 |
| putative protein similar to unknown protein (pir T09909)                                                                                         | 250306_at | -1.5 |
| 2-oxoglutarate/malate translocator precursor -like protein 2-oxoglutarate/malate translocator precursor, spinach, SWISSPROT:SOT1_SPIOL; supp     | 250278_at | -1.5 |
| putative protein various predicted proteins                                                                                                      | 249920_at | -1.5 |
| putative protein similar to unknown protein (emb CAB62461.1);supported by full-length cDNA: Ceres:268701.                                        | 249752_at | -1.5 |
| putative protein similar to unknown protein (pir S75227);supported by full-length cDNA: Ceres:22.                                                | 249524_at | -1.5 |
| beta-1,3-glucanase-like protein                                                                                                                  | 249214_at | -1.5 |
| carnitine/acylcarnitine translocase-like protein ;supported by full-length cDNA: Ceres:13730.                                                    | 248838_at | -1.5 |
| acetyl-CoA C-acetyltransferase ; supported by cDNA: gi_16604582_gb_AY059736.1_                                                                   | 248690_at | -1.5 |
| unknown protein ;supported by full-length cDNA: Ceres:116332.                                                                                    | 248646_at | -1.5 |
| putative protein similar to unknown protein (gb)AAD25141.1);supported by full-length cDNA: Ceres:33455.                                          | 248419_at | -1.5 |
| fructokinase 1 ; supported by cDNA: gi_13878052_gb_AF370289.1_AF370289                                                                           | 248381_at | -1.5 |
| putative protein contains similarity to unknown protein (dbj BAA90637.1)                                                                         | 248309_at | -1.5 |
| ankyrin-repeat-containing protein-like                                                                                                           | 248169_at | -1.5 |
| putative protein farnesylated protein GMFP5, Glycine max, EMBL:U64916                                                                            | 247594_at | -1.5 |
| putative protein similar to unknown protein (emb)CAB62102.1);supported by full-length cDNA: Ceres:40250.                                         | 246996_at | -1.5 |
| hypothetical protein contains similarity to phytoene dehydrogenase (PDH1) GI:433144 from [Cercospora nicotianae]                                 | 246411_at | -1.5 |
| putative protein ; supported by full-length cDNA: Ceres: 123997.                                                                                 | 246275_at | -1.5 |
| lipophosphoglycan biosynthetic protein - like lipophosphoglycan biosynthetic protein (LPG2), Leishmania donovani, TREMBL:LD26175                 | 246143_at | -1.5 |
| hydroxymethylbilane synthase ;supported by full-length cDNA: Ceres:3051.                                                                         | 246033_at | -1.5 |
| putative protein 22kDa peroxisomal membrane protein-like - Homo sapiens, EMBL:AF250136;supported by full-length cDNA: Ceres:6789.                | 245937_at | -1.5 |
| homeobox-leucine zipper protein HAT1 (hd-zip protein 1) ;supported by full-length cDNA: Ceres:34167.                                             | 245362_at | -1.5 |
| Expressed protein ; supported by full-length cDNA: Ceres: 14223.                                                                                 | 245370_at | -1.5 |
| ribosomal protein ;supported by full-length cDNA: Ceres:15384.                                                                                   | 245372_at | -1.5 |
| hypothetical protein ;supported by full-length cDNA: Ceres:17977.                                                                                | 245310_at | -1.5 |
| NADH dehydrogenase ND1                                                                                                                           | 244936_at | -1.5 |
| DNA polymerase alpha subunit IV (primase)-like protein                                                                                           | 249276_at | -1.5 |
| putative DNA-binding protein similar to AP2 and RAV1                                                                                             | 255582_at | -1.5 |
| putative protein various predicted proteins, Arabidopsis thaliana                                                                                | 250962_at | -1.5 |
| unknown protein                                                                                                                                  | 267400_at | -1.4 |
| unknown protein ; supported by cDNA: gi_13877742_gb_AF370134.1_AF370134                                                                          | 267339_at | -1.4 |
| unknown protein                                                                                                                                  | 266956_at | -1.4 |
| hypothetical protein predicted by genefinder;supported by full-length cDNA: Ceres:9671.                                                          | 266334_at | -1.4 |
| calmodulin identical to GB:L18912; supported by cDNA: gi_166650_gb_M38380.1_ATHCAM2                                                              | 266317_at | -1.4 |

|                                                                                                                                                         |             |      |
|---------------------------------------------------------------------------------------------------------------------------------------------------------|-------------|------|
| putative cytochrome b5 ;supported by full-length cDNA: Ceres:3743.                                                                                      | 266326_at   | -1.4 |
| predicted protein ;supported by cDNA: Ceres:168                                                                                                         | 266059_at   | -1.4 |
| putative cytidine deaminase ;supported by full-length cDNA: Ceres:152285.                                                                               | 265943_at   | -1.4 |
| putative purine-rich single-stranded DNA-binding protein ; supported by cDNA: gi_15450692_gb_AY052714.1_                                                | 265677_at   | -1.4 |
| putative thioredoxin M ; supported by cDNA: gi_6539611_gb_AF095751.1_AF095751                                                                           | 265476_at   | -1.4 |
| 3-ketoacyl-acyl carrier protein synthase III (KAS III) identical to 3-ketoacyl-acyl carrier protein synthase III (KAS III) GB:CAA72385 GI:1888359 (Aral | 265120_at   | -1.4 |
| unknown protein ;supported by full-length cDNA: Ceres:25812.                                                                                            | 265057_at   | -1.4 |
| Expressed protein ; supported by full-length cDNA: Ceres: 108558.                                                                                       | 264579_at   | -1.4 |
| similar to early nodulins                                                                                                                               | 264377_at   | -1.4 |
| antigen receptor, putative similar to antigen receptor GI:3982955 from [Ginglymostoma cirratum];supported by full-length cDNA: Ceres:4326.              | 264161_at   | -1.4 |
| hypothetical protein predicted by genscan+;supported by full-length cDNA: Ceres:36412.                                                                  | 264091_at   | -1.4 |
| putative cytochrome P450                                                                                                                                | 264052_at   | -1.4 |
| hypothetical protein predicted by graii;supported by full-length cDNA: Ceres:2928.                                                                      | 263980_at   | -1.4 |
| putative auxin-induced protein, IAA17/AXR3-1 Identical to Arabidopsis gb AF040632 and gb U49073 IAA17/AXR3 gene. ESTs gb H36782 and gb f                | 263664_at   | -1.4 |
| arginine decarboxylase identical to GP:1590814:U52851; supported by cDNA: gi_1590813_gb_U52851.1_ATU52851                                               | 263241_at   | -1.4 |
| putative fructokinase ; supported by full-length cDNA: Ceres: 17664.                                                                                    | 263250_at   | -1.4 |
| myrosinase-associated protein, putative similar to myrosinase-associated protein GI:1769969 from [Brassica napus];supported by full-length cDNA         | 263153_s_at | -1.4 |
| nodulin-like protein similar to MtN21 GB:CAA75575 GI:2598575 from [Medicago truncatula] (Mol. Plant Microbe Interact. 9 (4), 233-242 (1996)); su        | 262951_at   | -1.4 |
| hypothetical protein similar to hypothetical protein GB:AAF24593 GI:6692128 from [Arabidopsis thaliana]                                                 | 262552_at   | -1.4 |
| putative amino acid transporter Very similar to amino acid transporter AAT1 [Arabidopsis thaliana] (gi 1076291)                                         | 262522_at   | -1.4 |
| unknown protein ;supported by full-length cDNA: Ceres:95546.                                                                                            | 262396_at   | -1.4 |
| unknown protein                                                                                                                                         | 261944_at   | -1.4 |
| 3-deoxy-D-arabino-heptulosonate 7-phosphate, putative similar to 3-deoxy-D-arabino-heptulosonate 7-phosphate GI:170224 from [Nicotiana tabac            | 261933_at   | -1.4 |
| choline kinase, putative similar to CHOLINE/ETHANOLAMINE KINASE GB:Q9Y259 from [Homo sapiens]                                                           | 261506_at   | -1.4 |
| transcription factor, putative contains AP2 domain                                                                                                      | 261327_at   | -1.4 |
| thioredoxin identical to GB:CAA84610 from [Arabidopsis thaliana] (Proc. Natl. Acad. Sci. U.S.A. 92 (12), 5620-5624 (1995));supported by full-length     | 261145_at   | -1.4 |
| lipase-like protein similar to lipase GB:AAD01804 GI:4103627 from [Dianthus caryophyllus];supported by full-length cDNA: Ceres:12912.                   | 260791_at   | -1.4 |
| UDP-glucose glucosyltransferase, putative similar to UDP-glucose glucosyltransferase GI:3928543 from [Arabidopsis thaliana]                             | 260799_at   | -1.4 |
| myb-related protein, putative similar to GB:CAB91874 from [Lycopersicon esculentum]                                                                     | 260664_at   | -1.4 |
| unknown protein                                                                                                                                         | 260635_at   | -1.4 |
| putative lipoxygenase similar to lipoxygenase GB:CAB56692 [Arabidopsis thaliana]; supported by cDNA: gi_15810254_gb_AY056166.1_                         | 260399_at   | -1.4 |
| homeobox gene 13 protein identical to homeobox gene 13 protein gb AAF20996.1 AF208044_1 [Arabidopsis thaliana];supported by full-length cDN.            | 260395_at   | -1.4 |
| phosphoethanolamine N-methyltransferase, putative similar to GI:7407189 from [Spinacia oleracea]                                                        | 259842_at   | -1.4 |
| putative ribose 5-phosphate isomerase similar to ribose 5-phosphate isomerase GB:6677767 from [Mus musculus];supported by full-length cDNA: C           | 259749_at   | -1.4 |
| putative AUX1-like permease similar to AUX1 (regulator of root gravitropism, putative permease) GB:CAA67308 [Arabidopsis thaliana]; supported t         | 259680_at   | -1.4 |
| Expressed protein ; supported by full-length cDNA: Ceres: 14943.                                                                                        | 259661_at   | -1.4 |
| unknown protein                                                                                                                                         | 259160_at   | -1.4 |
| stress related protein, putative similar to stress related protein GB:AAD51854 from [Vitis riparia];supported by full-length cDNA: Ceres:13300.         | 259105_at   | -1.4 |
| putative glucan endo-1-3-beta-glucosidase similar to glucan endo-1-3-beta-glucosidase precursor GB:P52409 [Triticum aestivum];supported by full-        | 259014_at   | -1.4 |
| hypothetical protein predicted by genscan+;supported by full-length cDNA: Ceres:6768.                                                                   | 258676_at   | -1.4 |
| putative 40S ribosomal protein similar to ribosomal protein S7 GB:AAD26256 from [Secale cereale];supported by full-length cDNA: Ceres:30349.            | 258486_at   | -1.4 |
| early auxin-induced protein, IAA19 identical to IAA19 GB:AAB84356 from [Arabidopsis thaliana]; supported by full-length cDNA: Ceres: 94231.             | 258399_at   | -1.4 |
| putative ribosomal protein similar to ribosomal protein L41 GB:AAA34366 from [Candida maltosa]; supported by full-length cDNA: Ceres: 13557.            | 258296_at   | -1.4 |
| unknown protein ;supported by full-length cDNA: Ceres:8259.                                                                                             | 258275_at   | -1.4 |
| protein phosphatase 2A regulatory subunit isoform B delta identical to GB:AAD02810 from [Arabidopsis thaliana]; supported by cDNA: gi_4106339_          | 258060_at   | -1.4 |
| hypothetical protein predicted by genscan+; supported by cDNA: gi_13937132_gb_AF372920.1_AF372920                                                       | 257794_at   | -1.4 |
| integral membrane protein, putative contains Pfam profile: PF01554 uncharacterized membrane protein family; supported by cDNA: gi_16323120_             | 257314_at   | -1.4 |
| MYB family transcription factor (hsr1), putative identical to myb-like protein GB:AU007289 [Arabidopsis thaliana] (Plant J. 20 (1), 57-66 (1999));supp  | 257140_at   | -1.4 |
| MAP kinase kinase 4 (ATMKK4) identical to MAP kinase kinase 4 [Arabidopsis thaliana]; supported by cDNA: gi_13265419_gb_AF324667.2_AF32                 | 256183_at   | -1.4 |
| pathogenesis-related group 5 protein, putative similar to pathogenesis-related group 5 protein GI:2749943 from [Brassica rapa]; supported by cDN/       | 256125_at   | -1.4 |
| unknown protein                                                                                                                                         | 256046_at   | -1.4 |
| ribosomal protein, putative similar to ribosomal protein L35a GI:57118 from [Rattus norvegicus]; supported by full-length cDNA: Ceres: 2778.            | 256065_at   | -1.4 |
| unknown protein ;supported by full-length cDNA: Ceres:108615.                                                                                           | 255908_s_at | -1.4 |
| putative chitinase similar to peanut type II chitinase, GenBank accession number X82329, E.C. 3.2.1.14                                                  | 255595_at   | -1.4 |
| H+-transporting ATP synthase-like protein H+-transporting ATP synthase (EC 3.6.1.34) delta chain precursor, chloroplast - Nicotiana tabacum,PIR;        | 255046_at   | -1.4 |
| extensin - like protein hybrid proline-rich protein, Zea mays, PIR2:JQ1663                                                                              | 254314_at   | -1.4 |
| cytokinin oxidase - like protein cytokinin oxidase, Zea mays, gb:Y18377; supported by cDNA: gi_15450760_gb_AY054460.1_                                  | 253696_at   | -1.4 |

|                                                                                                                                                                      |             |      |
|----------------------------------------------------------------------------------------------------------------------------------------------------------------------|-------------|------|
| putative protein ; supported by full-length cDNA: Ceres: 2891.                                                                                                       | 253670_at   | -1.4 |
| cytochrome P450 monooxygenase ;supported by full-length cDNA: Ceres:13745.                                                                                           | 253534_at   | -1.4 |
| putative protein mRNAs from Ricinus communis and Medicago sativa, ZB1012 and L36159;supported by full-length cDNA: Ceres:37529.                                      | 253437_at   | -1.4 |
| putative protein GATA transcription factor 3, Arabidopsis thaliana, gb:Y13650                                                                                        | 253406_at   | -1.4 |
| putative protein SPOP, Homo sapiens, AJ000644;supported by full-length cDNA: Ceres:122670.                                                                           | 253061_at   | -1.4 |
| hypothetical protein hypothetical protein - Arabidopsis thaliana chromosome 4 AP2 contig, PID:e353223;supported by full-length cDNA: Ceres:1004                      | 252133_at   | -1.4 |
| putative calmodulin calmodulin - Tetrahymena pyriformis (SGC5),PIR1:MCTE; supported by cDNA: gi_14190470_gb_AF380635.1_AF380635                                      | 252037_at   | -1.4 |
| 40S ribosomal protein S21 homolog ribosomal protein S21, cytosolic - Oryza sativa, PIR:S38357;supported by full-length cDNA: Ceres:26837.                            | 251921_at   | -1.4 |
| tryptophan synthase alpha chain ; supported by full-length cDNA: Ceres: 40110.                                                                                       | 251847_at   | -1.4 |
| F-box protein family, AtFBL17 contains similarity to F-box protein FBL2 GI:6010699 from [Rattus norvegicus]                                                          | 251850_at   | -1.4 |
| putative protein hypothetical protein F22K20.16 - Arabidopsis thaliana, EMBL:AC002291                                                                                | 251701_at   | -1.4 |
| putative protein unknown protein 110K5.12 - Sorghum bicolor, TREMBL:AF124045_5;supported by full-length cDNA: Ceres:142358.                                          | 251704_at   | -1.4 |
| putative protein NODULIN-26 - Glycine max, EMBL:X04782; supported by full-length cDNA: Ceres: 32275.                                                                 | 251661_at   | -1.4 |
| glutaredoxin -like protein glutaredoxin, castor bean, PIR:S54825                                                                                                     | 251195_at   | -1.4 |
| putative protein ; supported by cDNA: gi_13358223_gb_AF325034.2_AF325034                                                                                             | 251036_at   | -1.4 |
| 60S ribosomal protein - like 60S ribosomal protein L36, Arabidopsis thaliana, EMBL:AC004684;supported by full-length cDNA: Ceres:30903.                              | 251018_at   | -1.4 |
| putative protein hypothetical proteins - Arabidopsis thaliana;supported by full-length cDNA: Ceres:12022.                                                            | 250618_at   | -1.4 |
| peptide methionine sulfoxide reductase-like protein peptide methionine sulfoxide reductase (msr) - Arabidopsis thaliana, EMBL:AJ133753                               | 250633_at   | -1.4 |
| putative protein predicted proteins, Arabidopsis thaliana;supported by full-length cDNA: Ceres:263168.                                                               | 250398_at   | -1.4 |
| putative protein many predicted proteins, Arabidopsis thaliana; supported by cDNA: gi_15983504_gb_AF424627.1_AF424627                                                | 250110_at   | -1.4 |
| plasma membrane associated protein -like plasma membrane associated protein, Hordeum vulgare, EMBL:AF218627;supported by full-length cDNA                            | 249958_at   | -1.4 |
| disease resistance protein-like                                                                                                                                      | 249029_at   | -1.4 |
| putative protein similar to unknown protein (gb)AAF24540.1);supported by full-length cDNA: Ceres:141753.                                                             | 248923_at   | -1.4 |
| putative protein similar to unknown protein (pir T05073)                                                                                                             | 248865_at   | -1.4 |
| FRO2-like protein; NADPH oxidase-like                                                                                                                                | 248566_s_at | -1.4 |
| unknown protein ; supported by full-length cDNA: Ceres: 266744.                                                                                                      | 248377_at   | -1.4 |
| putative protein contains similarity to MYB family transcription factor                                                                                              | 248246_at   | -1.4 |
| calcineurin B-like protein 2 (gb)AAC26009.1) ;supported by full-length cDNA: Ceres:37280.                                                                            | 248001_at   | -1.4 |
| putative protein non-consensus CG donor splice site at exon 1, GA donor splice site at exon 3, similar to unknown protein (pir T04268);supported by full-length cDNA | 247933_at   | -1.4 |
| CONSTANS-like 1                                                                                                                                                      | 246523_at   | -1.4 |
| blue copper binding protein ;supported by full-length cDNA: Ceres:7767.                                                                                              | 246099_at   | -1.4 |
| bZIP transcription factor family protein similar to seed storage protein opaque-2(bZIP family)GI:168428 from Zea mays; supported by cDNA: gi_154                     | 245925_at   | -1.4 |
| hypothetical protein similar to hypothetical protein GI:6524175 from [Arabidopsis thaliana];supported by full-length cDNA: Ceres:3618.                               | 245816_at   | -1.4 |
| hypothetical protein similar to putative purple acid phosphatase precursor GI:7331195 from [Glycine max]                                                             | 245637_at   | -1.4 |
| unknown protein predicted by genscan; supported by cDNA: gi_3822215_gb_AF074948.1_AF074948                                                                           | 245138_at   | -1.4 |
| hypothetical protein                                                                                                                                                 | 244965_at   | -1.4 |
| putative oxidoreductase similar to adventitious rooting related oxygenase GB:CAA12386 from [Malus domestica]                                                         | 260149_at   | -1.4 |
| unknown protein                                                                                                                                                      | 267383_at   | -1.3 |
| putative SET-domain transcriptional regulator                                                                                                                        | 267290_at   | -1.3 |
| putative protein transport protein SEC13 ;supported by full-length cDNA: Ceres:36577.                                                                                | 267277_at   | -1.3 |
| cyclin-dependent kinase inhibitor protein identical to GB:U94772;supported by full-length cDNA: Ceres:17682.                                                         | 267135_at   | -1.3 |
| similar to SOR1 from the fungus Cercospora nicotianae                                                                                                                | 267138_s_at | -1.3 |
| copa-like retroelement pol polyprotein ; supported by full-length cDNA: Ceres: 14718.                                                                                | 266696_at   | -1.3 |
| putative proline-rich protein ; supported by cDNA: gi_13265425_gb_AF324669.2_AF324669                                                                                | 266588_at   | -1.3 |
| putative chloroplast ribosomal protein L35                                                                                                                           | 266570_at   | -1.3 |
| unknown protein ; supported by cDNA: gi_14334561_gb_AY035185.1_                                                                                                      | 266329_at   | -1.3 |
| putative C-4 sterol methyl oxidase ;supported by full-length cDNA: Ceres:23439.                                                                                      | 266289_at   | -1.3 |
| hypothetical protein predicted by genscan                                                                                                                            | 265704_at   | -1.3 |
| unknown protein ; supported by full-length cDNA: Ceres: 25575.                                                                                                       | 265459_at   | -1.3 |
| putative secretory carrier-associated membrane protein                                                                                                               | 265419_at   | -1.3 |
| unknown protein                                                                                                                                                      | 264774_at   | -1.3 |
| putative superoxide-generating NADPH oxidase flavocytochrome highly similar to GB:CAA70769, FRO1 and GB:CAA70770, FRO2 from [Arabidopsis thaliana]                   | 264751_at   | -1.3 |
| hypothetical protein similar to carnitine racemase like protein GI:7268149 from [Arabidopsis thaliana]                                                               | 264627_at   | -1.3 |
| hypothetical protein contains similarity to phosphate/phosphoenolpyruvate translocator precursor GI:1778141 from [Arabidopsis thaliana]                              | 264419_s_at | -1.3 |
| unknown protein predicted by genscan and graii;supported by full-length cDNA: Ceres:14105.                                                                           | 264380_at   | -1.3 |
| hypothetical protein predicted by genscan;supported by full-length cDNA: Ceres:114613.                                                                               | 263930_at   | -1.3 |
| unknown protein ;supported by full-length cDNA: Ceres:33232.                                                                                                         | 263880_at   | -1.3 |

|                                                                                                                                                      |             |      |
|------------------------------------------------------------------------------------------------------------------------------------------------------|-------------|------|
| putative WRKY-type DNA binding protein ; supported by cDNA: gi_15430276_gb_AY046275.1_                                                               | 263783_at   | -1.3 |
| unknown protein ; supported by cDNA: gi_15724183_gb_AF411794.1_AF411794                                                                              | 263799_at   | -1.3 |
| unknown protein ; supported by full-length cDNA: Ceres:14471.                                                                                        | 263737_at   | -1.3 |
| unknown protein ; supported by full-length cDNA: Ceres: 97914.                                                                                       | 263541_at   | -1.3 |
| unknown protein ; supported by cDNA: gi_13605844_gb_AF367321.1_AF367321                                                                              | 263499_at   | -1.3 |
| putative anthranilate N-hydroxycinnamoyl/benzoyltransferase ;supported by full-length cDNA: Ceres:105546.                                            | 263382_at   | -1.3 |
| delta 9 desaturase ALMOST identical (4 aa diff t) to GP:2970036;supported by full-length cDNA: Ceres:21841.                                          | 263249_at   | -1.3 |
| unknown protein ; supported by cDNA: gi_15146251_gb_AY049267.1_                                                                                      | 263046_at   | -1.3 |
| hypothetical protein Pfam                                                                                                                            | 262533_at   | -1.3 |
| putative G protein coupled receptor identical to putative G protein coupled receptor GI:2104224 from [Arabidopsis thaliana]; supported by cDNA: gi_  | 262234_at   | -1.3 |
| hypothetical protein predicted by genemark.hmm; supported by full-length cDNA: Ceres: 38293.                                                         | 261940_at   | -1.3 |
| pectin methylesterase, putative similar to pectin methylesterase GI:1617583 from [Lycopersicon esculentum]; supported by cDNA: gi_14334991_gi_       | 261826_at   | -1.3 |
| S-adenosyl-methionine-sterol-C-methyltransferase, putative almost identical to S-adenosyl-methionine-sterol-C-methyltransferase GI:2246456 from      | 261727_at   | -1.3 |
| clathrin coat assembly protein AP17, putative similar to clathrin coat assembly protein AP17 GB:CAA65533 GI:2959358 from [Zea mays]                  | 261733_at   | -1.3 |
| hypothetical protein predicted by genemark.hmm; supported by full-length cDNA: Ceres: 13874.                                                         | 261057_at   | -1.3 |
| beta-galactosidase, putative similar to beta-galactosidase GI:3299896 from [Lycopersicon esculentum]; supported by cDNA: gi_16604399_gb_AY0          | 260944_at   | -1.3 |
| unknown protein contains similarity to UDPG glucosyltransferase GB:AAB62270 GI:2232354 from [Solanum berthaultii];supported by full-length cDN       | 260955_at   | -1.3 |
| DNA binding protein, putative similar to DNA binding protein WRKY3 GB:U56834 GI:1432055 from [Petroselinum crispum]                                  | 260882_at   | -1.3 |
| TINY-like protein similar to TINY GB:CAA64359 GI:1246403 from [Arabidopsis thaliana];supported by full-length cDNA: Ceres:19721.                     | 260856_at   | -1.3 |
| hypothetical protein predicted by genemark.hmm;supported by full-length cDNA: Ceres:29740.                                                           | 260867_at   | -1.3 |
| mitochondrial NAD-dependent malate dehydrogenase identical to mitochondrial NAD-dependent malate dehydrogenase GI:3929649 from [Arabidop             | 260615_at   | -1.3 |
| putative molybdopterin synthase large subunit ; supported by cDNA: gi_13605721_gb_AF361842.1_AF361842                                                | 260572_at   | -1.3 |
| unknown protein ; supported by cDNA: gi_15912212_gb_AY056384.1_                                                                                      | 260371_at   | -1.3 |
| unknown protein similar to Ca+2-binding EF hand protein GB:AAB71227 [Glycine max];supported by full-length cDNA: Ceres:5143.                         | 260208_s_at | -1.3 |
| hypothetical protein predicted by genscan+                                                                                                           | 260109_at   | -1.3 |
| hypothetical protein                                                                                                                                 | 260051_at   | -1.3 |
| hypothetical protein predicted by genefinder                                                                                                         | 259996_at   | -1.3 |
| thaumatin-like protein (PR-5) similar to thaumatin GB:AAD55090 [Vitis riparia]; contains Pfam profile: PF00314 Thaumatin family; supported by cDN    | 259987_at   | -1.3 |
| putative thymidine kinase similar to thymidine kinase GB:AAC31168 [Oryza sativa]; supported by full-length cDNA: Ceres: 19188.                       | 259224_at   | -1.3 |
| putative ribosomal protein S2 similar to putative ribosomal protein S2 GB:CAA74226 [Mitochondrion Triticum aestivum];supported by full-length cDN    | 259196_at   | -1.3 |
| unknown protein similar to putative protein GB:CAA22987 [Arabidopsis thaliana]                                                                       | 259181_at   | -1.3 |
| unknown protein ;supported by full-length cDNA: Ceres:9221.                                                                                          | 259106_at   | -1.3 |
| germin-like protein similar to germin type 2 GB:S71254 [Arabidopsis thaliana];supported by full-length cDNA: Ceres:19265.                            | 258938_at   | -1.3 |
| threonine dehydratase/deaminase (OMR1) identical to threonine dehydratase/deaminase (OMR1) GB:AAC97936, GB:AF096281 [Arabidopsis thali               | 258884_at   | -1.3 |
| unknown protein similar to hypothetical proteins GB:CAB16818, GB:AAD55277                                                                            | 258911_at   | -1.3 |
| Expressed protein ; supported by full-length cDNA: Ceres: 32612.                                                                                     | 258713_at   | -1.3 |
| putative adenosine kinase similar to adenosine kinase GB:CAB40376 [Zea mays]; supported by cDNA: gi_12017761_gb_AF180894.1_AF180894                  | 258658_at   | -1.3 |
| putative S-adenosylmethionine:2-demethylmenaquinone methyltransferase similar to S-adenosylmethionine:2-demethylmenaquinone methyltransfe            | 258614_at   | -1.3 |
| hypothetical protein predicted by genemark.hmm, contains Pfam profile:PF00320 GATA zinc finger;supported by full-length cDNA: Ceres:110655.          | 258529_at   | -1.3 |
| unknown protein                                                                                                                                      | 258462_at   | -1.3 |
| AIG2-like protein similar to AIG2 protein GB:P54121 from [Arabidopsis thaliana];supported by full-length cDNA: Ceres:5137.                           | 258000_at   | -1.3 |
| hypothetical protein predicted genemark;supported by full-length cDNA: Ceres:255040.                                                                 | 258021_at   | -1.3 |
| unknown protein ;supported by full-length cDNA: Ceres:92314.                                                                                         | 257925_at   | -1.3 |
| unknown protein                                                                                                                                      | 257867_at   | -1.3 |
| hypothetical protein predicted by genemark.hmm                                                                                                       | 257748_at   | -1.3 |
| hypothetical protein predicted by genemark.hmm;supported by full-length cDNA: Ceres:104278.                                                          | 257751_at   | -1.3 |
| non-race specific disease resistance protein, putative contains non-consensus CT donor splice site at exon 1; potential pseudogene; similar to non-  | 257083_s_at | -1.3 |
| hypothetical protein ;supported by full-length cDNA: Ceres:9965.                                                                                     | 257093_at   | -1.3 |
| unknown protein                                                                                                                                      | 257076_at   | -1.3 |
| ADP-ribosylation factor, putative similar to ADP-ribosylation factor GB:P91924 [Dugesia japonica]; supported by full-length cDNA: Ceres: 24097.      | 256838_at   | -1.3 |
| hypothetical protein predicted by genscan                                                                                                            | 256427_at   | -1.3 |
| hypothetical protein contains similarity to photosystem II 22 kDa protein GI:6006279 from [Arabidopsis thaliana];supported by full-length cDNA: Cere | 255982_at   | -1.3 |
| coded for by A. thaliana cDNA R30513                                                                                                                 | 255716_at   | -1.3 |
| putative inorganic phosphatase ; supported by cDNA: gi_15450871_gb_AY054516.1_                                                                       | 255587_at   | -1.3 |
| contains similarity to a protein kinase domain (Pfam: pkinase.hmm, score: 165.48), to legume lectins beta domain (Pfam: lectin_legB.hmm, score: 7    | 255503_at   | -1.3 |
| putative vacuolar ATPase similar to vacuolar ATPase, GenBank accession number P50408;supported by full-length cDNA: Ceres:10207.                     | 255498_at   | -1.3 |
| flavonoid 3,5-hydroxylase -like protein flavonoid 3,5 -hydroxylase - Campanula medium, PID:d1003951                                                  | 254835_s_at | -1.3 |

|                                                                                                                                                      |           |      |
|------------------------------------------------------------------------------------------------------------------------------------------------------|-----------|------|
| Expressed protein ; supported by full-length cDNA: Ceres: 266299.                                                                                    | 254505_at | -1.3 |
| putative protein storage protein - Populus deltoides, PIR2:S31580                                                                                    | 254150_at | -1.3 |
| hypothetical protein                                                                                                                                 | 254137_at | -1.3 |
| putative Proline synthetase associated protein Proline synthetase associated - Homo sapiens, PID:d1037830;supported by full-length cDNA: Ceres       | 253951_at | -1.3 |
| putative protein ;supported by full-length cDNA: Ceres:113484.                                                                                       | 253891_at | -1.3 |
| glycine-rich protein like glycine-rich protein 5 - Arabidopsis thaliana,PIR2:JQ1064; supported by full-length cDNA: Ceres: 33435.                    | 253754_at | -1.3 |
| putative auxin-induced protein high similarity to auxin-induced protein 15A, soybean, PIR2:JQ1096; supported by cDNA: gi_13194817_gb_AF3495          | 253103_at | -1.3 |
| CCR4-associated factor 1-like protein CAF1_MOUSE CCR4-ASSOCIATED FACTOR 1 - Mus musculus, SWISSPROT:CAF1_MOUSE; supported                            | 252679_at | -1.3 |
| protein kinase - like receptor-like protein kinase RLK3, Arabidopsis thaliana, EMBL:ATH011674                                                        | 252549_at | -1.3 |
| putative protein several oxidases, mainly gibberellin 20-oxidases                                                                                    | 252529_at | -1.3 |
| putative protein several hypothetical proteins - Arabidopsis thaliana                                                                                | 252474_at | -1.3 |
| hypothetical protein various predicted proteins, Arabidopsis thaliana                                                                                | 252205_at | -1.3 |
| expressed protein supported by cDNA: gi:15450891                                                                                                     | 252048_at | -1.3 |
| putative protein photosystem II oxygen evolving complex protein 2 precursor (psbP), Fritillariaagrestis, EMBL:AF037458;supported by full-length c[   | 251784_at | -1.3 |
| cysteine synthase AtcysC1 ;supported by full-length cDNA: Ceres:32851.                                                                               | 251322_at | -1.3 |
| ATMRK1 ;supported by full-length cDNA: Ceres:253505.                                                                                                 | 251170_at | -1.3 |
| serine/threonine protein kinase ATPK10 ; supported by cDNA: gi_13249133_gb_AF302111.1_AF302111                                                       | 251059_at | -1.3 |
| high affinity nitrate transporter - like protein high affinity nitrate transporter, Oryza sativa, EMBL:AB008519; supported by cDNA: gi_14334783_gb_/ | 250151_at | -1.3 |
| GASA4 ; supported by cDNA: gi_950098_gb_U15683.1_ATU15683                                                                                            | 250109_at | -1.3 |
| putative protein similar to unknown protein (pir T41692);supported by full-length cDNA: Ceres:31527.                                                 | 250097_at | -1.3 |
| unknown protein ;supported by full-length cDNA: Ceres:141953.                                                                                        | 249750_at | -1.3 |
| hypothetical protein ;supported by full-length cDNA: Ceres:40348.                                                                                    | 249625_at | -1.3 |
| acyltransferase -like protein Anthocyanin 5-aromatic acyltransferase, Gentiana triflora, EMBL:AB010708;supported by full-length cDNA: Ceres:3781     | 249493_at | -1.3 |
| unknown protein ;supported by full-length cDNA: Ceres:42577.                                                                                         | 249288_at | -1.3 |
| putative protein similar to unknown protein (pir T09377)                                                                                             | 249211_at | -1.3 |
| putative protein similar to unknown protein (pir T00965);supported by full-length cDNA: Ceres:777.                                                   | 249076_at | -1.3 |
| NBD-like protein (gb AAD20643.1) ;supported by full-length cDNA: Ceres:33802.                                                                        | 249063_at | -1.3 |
| putative protein similar to unknown protein (pir T04426);supported by full-length cDNA: Ceres:27099.                                                 | 248951_at | -1.3 |
| putative protein similar to unknown protein (gb AAC61815.1);supported by full-length cDNA: Ceres:254442.                                             | 248868_at | -1.3 |
| integral membrane protein-like                                                                                                                       | 248392_at | -1.3 |
| unknown protein ;supported by full-length cDNA: Ceres:148254.                                                                                        | 248282_at | -1.3 |
| GS1-like protein ;supported by full-length cDNA: Ceres:110980.                                                                                       | 247908_at | -1.3 |
| D-xylose-H+ symporter - like protein D-xylose-H+ symporter, Lactobacillus brevis, EMBL:AF045552                                                      | 247709_at | -1.3 |
| putative Rab5-interacting protein - like putative Rab5-interacting protein, Homo sapiens, EMBL:AF112213                                              | 247725_at | -1.3 |
| cytoplasmic ribosomal protein S15a - like cytoplasmic ribosomal protein S15a, Arabidopsis thaliana, EMBL:ATAF1412;supported by full-length cDN       | 247654_at | -1.3 |
| putative protein                                                                                                                                     | 247628_at | -1.3 |
| putative protein strong similarity to unknown protein (gb AAD55298.1); supported by cDNA: gi_14423505_gb_AF386990.1_AF386990                         | 247444_at | -1.3 |
| putative protein predicted proteins, Arabidopsis thaliana                                                                                            | 247448_at | -1.3 |
| permease 1 - like protein permease 1, common ice plant, PIR:T12309; supported by cDNA: gi_14334659_gb_AY035003.1_                                    | 247404_at | -1.3 |
| receptor protein kinase-like protein                                                                                                                 | 247153_at | -1.3 |
| putative protein predicted protein, Arabidopsis thaliana; supported by full-length cDNA: Ceres: 108472.                                              | 246744_at | -1.3 |
| glucose 6 phosphate/phosphate translocator-like protein glucose 6 phosphate/phosphate translocator - Arabidopsis thaliana, EMBL:AF233658; sup        | 246445_at | -1.3 |
| hypothetical protein predicted by genemark.hmm                                                                                                       | 246408_at | -1.3 |
| hypothetical protein                                                                                                                                 | 245414_at | -1.3 |
| SUPERMAN like protein                                                                                                                                | 245383_at | -1.3 |
| Expressed protein ; supported by full-length cDNA: Ceres: 5455.                                                                                      | 245334_at | -1.3 |
| unknown protein ;supported by full-length cDNA: Ceres:101081.                                                                                        | 267459_at | -1.3 |
| unknown protein ; supported by cDNA: gi_16930468_gb_AF419588.1_AF419588                                                                              | 267381_at | -1.2 |
| putative LIM-domain protein                                                                                                                          | 267355_at | -1.2 |
| putative receptor-like protein kinase same as GB:X95909 (polymorphism exists at a GA repeat. We found 6 copies in our sequence whereas only 5        | 267165_at | -1.2 |
| 30S ribosomal protein S31 ;supported by full-length cDNA: Ceres:4723.                                                                                | 267088_at | -1.2 |
| putative myrosinase-binding protein ;supported by full-length cDNA: Ceres:39069.                                                                     | 266989_at | -1.2 |
| Expressed protein ; supported by full-length cDNA: Ceres: 19349.                                                                                     | 266906_at | -1.2 |
| profilin 1 ; supported by cDNA: gi_1353769_gb_U43325.1_ATU43325                                                                                      | 266701_at | -1.2 |
| unknown protein                                                                                                                                      | 266566_at | -1.2 |
| 60S acidic ribosomal protein P2 ;supported by full-length cDNA: Ceres:19986.                                                                         | 266258_at | -1.2 |
| unknown protein ; supported by cDNA: gi_16604321_gb_AY058059.1_                                                                                      | 266101_at | -1.2 |

|                                                                                                                                                       |             |      |
|-------------------------------------------------------------------------------------------------------------------------------------------------------|-------------|------|
| unknown protein                                                                                                                                       | 266071_at   | -1.2 |
| enoyl-ACP reductase (enr-A)                                                                                                                           | 266035_at   | -1.2 |
| predicted by genscan and genefinder ;supported by full-length cDNA: Ceres:120459.                                                                     | 265732_at   | -1.2 |
| putative RNA-binding glycine rich protein (RGP-2) ;supported by full-length cDNA: Ceres:18569.                                                        | 265641_at   | -1.2 |
| Expressed protein ; supported by full-length cDNA: Ceres: 11006.                                                                                      | 265456_at   | -1.2 |
| unknown protein                                                                                                                                       | 265265_at   | -1.2 |
| 50S ribosomal protein L3 ;supported by full-length cDNA: Ceres:142861.                                                                                | 265247_at   | -1.2 |
| unknown protein contains similarity to seed protein B32E GI:19046 from [Hordeum vulgare]                                                              | 264951_at   | -1.2 |
| putative thioredoxin reductase                                                                                                                        | 264904_s_at | -1.2 |
| unknown protein similar to putative glycosyl transferase GI:7268597 from [Arabidopsis thaliana]; supported by cDNA: gi_13878002_gb_AF370264.1         | 264704_at   | -1.2 |
| unknown protein ;supported by full-length cDNA: Ceres:2935.                                                                                           | 264609_at   | -1.2 |
| unknown protein ;supported by full-length cDNA: Ceres:1011.                                                                                           | 264590_at   | -1.2 |
| carbonic anhydrase, putative similar to carbonic anhydrase GI:882241 from [Flaveria linearis]; supported by full-length cDNA: Ceres: 38715.           | 264313_at   | -1.2 |
| glycoprotein(EP1), putative similar to glycoprotein(EP1) GI:349436 from [Daucus carota]; supported by cDNA: gi_14334885_gb_AY035116.1_                | 264279_s_at | -1.2 |
| hypothetical protein similar to acyl-carrier protein (ACP) GI:17768 from [Brassica napus]; supported by full-length cDNA: Ceres: 1822.                | 264189_s_at | -1.2 |
| putative 40S ribosomal protein S18 Match to ribosomal S18 gene mRNA gb Z28701, DNA gb Z23165 from A. thaliana. ESTs gb T21121, gb Z1775               | 264203_at   | -1.2 |
| ethylene reponse factor-like AP2 domain transcription factor                                                                                          | 264083_at   | -1.2 |
| putative cyclin-dependent kinase regulatory subunit                                                                                                   | 264061_at   | -1.2 |
| metalloproteinase, putative similar to metalloproteinase GI:3128477 from [Arabidopsis thaliana]                                                       | 263731_at   | -1.2 |
| unknown protein Similar to Nicotiana lesion-inducing ORF (gb U66269)                                                                                  | 263651_at   | -1.2 |
| putative xyloglucan-specific glucanase identical to GB:D63509;supported by full-length cDNA: Ceres:18876.                                             | 263598_at   | -1.2 |
| putative fatty acid elongase ;supported by full-length cDNA: Ceres:115769.                                                                            | 263443_at   | -1.2 |
| Expressed protein ; supported by full-length cDNA: Ceres: 19631.                                                                                      | 263318_at   | -1.2 |
| ubiquitin extension protein (UBQ2) identical to GI:166930, GI:166931; supported by cDNA: gi_13430797_gb_AF360311.1_AF360311                           | 263289_at   | -1.2 |
| putative auxin-induced protein similar to gb D14414 Indole-3-acetic acid induced protein from Vigna radiata. ESTs gb AA712892 and gb Z17613 cor       | 262703_at   | -1.2 |
| hypothetical protein predicted by genscan+;supported by full-length cDNA: Ceres:109912.                                                               | 262711_at   | -1.2 |
| unknown protein                                                                                                                                       | 262432_at   | -1.2 |
| DNA-binding factor, putative similar to GT-2 factor GB: CAA51289 GI:416490 from [Arabidopsis thaliana]                                                | 261594_at   | -1.2 |
| pyruvate dehydrogenase E1 alpha subunit identical to pyruvate dehydrogenase E1 alpha subunit GB:AAB86803 GI:2454182 from [Arabidopsis thal            | 261583_at   | -1.2 |
| unknown protein ;supported by full-length cDNA: Ceres:108746.                                                                                         | 261455_at   | -1.2 |
| beta tubulin 1, putative similar to GB:AAD02498 from [Arabidopsis thaliana] (Plant Mol. Biol. 39 (1), 171-176 (1999)); supported by cDNA: gi_1360f    | 261230_at   | -1.2 |
| putative calcium-binding protein, calreticulin similar to SP:P12858 from [Arabidopsis thaliana]                                                       | 261197_at   | -1.2 |
| unknown protein ;supported by full-length cDNA: Ceres:41505.                                                                                          | 261105_at   | -1.2 |
| signal recognition particle 19 kDa protein subunit, putative similar to GB:U19030 from [Oryza sativa] (Plant Mol. Biol. 34 (3), 507-515 (1997)); supp | 260726_at   | -1.2 |
| unknown protein ; supported by cDNA: gi_13358204_gb_AF325013.2_AF325013                                                                               | 260686_at   | -1.2 |
| Expressed protein ; supported by full-length cDNA: Ceres: 91704.                                                                                      | 260549_at   | -1.2 |
| unknown protein                                                                                                                                       | 260281_at   | -1.2 |
| plasma membrane associated protein, putative similar to GI:6851373 from [Hordeum vulgare]                                                             | 259774_at   | -1.2 |
| endo-beta-1,4-galactanase, putative similar to GI:4972236 from [Fragaria x ananassa] (Plant Mol. Biol. 40, 323-332 (1999)); supported by cDNA: gi_    | 259736_at   | -1.2 |
| MAP kinase, putative similar to MAP kinase 5 GI:4239889 from [Zea mays]                                                                               | 259428_at   | -1.2 |
| unknown protein                                                                                                                                       | 259434_at   | -1.2 |
| hypothetical protein similar to putative glycosyl transferase GI:6862930 from [Arabidopsis thaliana];supported by full-length cDNA: Ceres:117402.     | 259358_at   | -1.2 |
| putative auxin-induced protein similar to SAUR GB:BAA25434 [Raphanus sativus]                                                                         | 259332_at   | -1.2 |
| unknown protein similar to hypothetical protein GB:S33464 [Arabidopsis thaliana]; supported by cDNA: gi_14517447_gb_AY039559.1_                       | 259228_at   | -1.2 |
| unknown protein similar to hypothetical protein GB:AAD27575 [Sorghum bicolor];supported by full-length cDNA: Ceres:23057.                             | 259131_at   | -1.2 |
| unknown protein Pfam HMM hit: FKBP-type peptidyl-prolyl cis-trans isomerases                                                                          | 258929_at   | -1.2 |
| putative wound-induced basic protein similar to wound-induced basic protein GB:Q09020 [Phaseolus vulgaris] (Plant Physiol. 101 (4), 1409 (1993));     | 258821_at   | -1.2 |
| hypothetical protein supported by full-length cDNA: Ceres:4427.                                                                                       | 258793_at   | -1.2 |
| putative serine carboxypeptidase II similar to serine carboxypeptidase II (CP-MII) GB:CAA70815 [Hordeum vulgare]                                      | 258633_at   | -1.2 |
| hypothetical protein predicted by genscan;supported by full-length cDNA: Ceres:19531.                                                                 | 258657_at   | -1.2 |
| putative jasmonic acid regulatory protein similar to jasmonic acid 2 GB:AAF04915 from [Lycopersicon esculentum]; supported by cDNA: gi_120604;        | 258385_at   | -1.2 |
| MAP kinase kinase 5 identical to GB:BAA28831 from [Arabidopsis thaliana]; supported by cDNA: gi_3219272_dbj_AB015316.1_AB015316                       | 258046_at   | -1.2 |
| cytochrome P450, putative contains Pfam profile: PF00067 cytochrome P450; supported by cDNA: gi_13430717_gb_AF360271.1_AF360271                       | 257636_at   | -1.2 |
| unknown protein ;supported by full-length cDNA: Ceres:3457.                                                                                           | 257644_at   | -1.2 |
| unknown protein contains Pfam profile: PF01165 ribosomal protein S21; supported by cDNA: gi_14532553_gb_AY039901.1_                                   | 256753_at   | -1.2 |
| histone H2A, putative similar to histone H2A GB:AAF64418 GI:7595337 from [Arabidopsis thaliana] (Proc. Natl. Acad. Sci. U.S.A. 97 (2), 948-953 (      | 256666_at   | -1.2 |
| unknown protein ; supported by cDNA: gi_14532501_gb_AY039875.1_                                                                                       | 256627_at   | -1.2 |

|                                                                                                                                                            |             |      |
|------------------------------------------------------------------------------------------------------------------------------------------------------------|-------------|------|
| ribosomal protein L41 identical to ribosomal protein L41 GB:AAA79268 [Pisum sativum]                                                                       | 256438_s_at | -1.2 |
| unknown protein contains similarity to alternative NADH-dehydrogenase GI:3718005 from [Yarrowia lipolytica];supported by full-length cDNA: Ceres:256057_at | 256057_at   | -1.2 |
| putative uroporphyrinogen decarboxylase ; supported by cDNA: gi_143334767_gb_AY035057.1_                                                                   | 255826_at   | -1.2 |
| 60S ribosomal protein L23 ;supported by full-length cDNA: Ceres:28563.                                                                                     | 255789_at   | -1.2 |
| PROLIFERA similar to S. cerevisiae MCM2-3-5 genes required for the initiation of DNA replication; supported by cDNA: gi_675490_gb_L39954.1_                | 255513_at   | -1.2 |
| DNA-binding protein ;supported by full-length cDNA: Ceres:28019.                                                                                           | 255037_at   | -1.2 |
| putative ribosomal protein L9, cytosolic ribosomal protein L9, cytosolic - garden pea, PIR2:S19978;supported by full-length cDNA: Ceres:21228.             | 254980_at   | -1.2 |
| RING-H2 finger protein RHA1a -like protein ;supported by full-length cDNA: Ceres:21591.                                                                    | 254922_at   | -1.2 |
| Expressed protein ; supported by full-length cDNA: Ceres: 11649.                                                                                           | 254761_at   | -1.2 |
| fatty acid elongase - like protein (cer2-like) cer2, Arabidopsis thaliana, X93080                                                                          | 254737_at   | -1.2 |
| pollen-specific protein - like 18.3K protein precursor, pollen, Zea mays, PIR2:JQ1107                                                                      | 254620_at   | -1.2 |
| ras-like GTP-binding protein strong homology to GTP-binding protein ric2, Oryza sativa, S38741                                                             | 254641_at   | -1.2 |
| putative protein glycine/proline-rich protein GPRP, Arabidopsis thaliana, PIR2:S65780; supported by full-length cDNA: Ceres: 8188.                         | 254559_at   | -1.2 |
| putative pectinacetyltransferase pectinacetyltransferase precursor, Vigna radiata, PIR2:S68805                                                             | 254573_at   | -1.2 |
| hypothetical protein                                                                                                                                       | 254484_at   | -1.2 |
| cell-cell signaling protein csgA - like cell-cell signaling protein csgA, Synechocystis sp., PIR2:S77176                                                   | 254485_at   | -1.2 |
| putative protein rape mRNA, Brassica napus, PIR2:S42651                                                                                                    | 254259_s_at | -1.2 |
| putative protein storage protein - Populus deltoides, PIR2:S31580;supported by full-length cDNA: Ceres:8772.                                               | 254163_s_at | -1.2 |
| putative mitochondrial uncoupling protein mitochondrial uncoupling protein, Arabidopsis thaliana (thale cress), PATX:E1316826;supported by full-l          | 254120_at   | -1.2 |
| putative protein qkl-7, Mus musculus                                                                                                                       | 253964_at   | -1.2 |
| xyloglucan endo-1,4-beta-D-glucanase precursor ;supported by full-length cDNA: Ceres:19156.                                                                | 253666_at   | -1.2 |
| putative protein                                                                                                                                           | 253414_at   | -1.2 |
| putative protein predicted protein, Arabidopsis thaliana;supported by full-length cDNA: Ceres:4354.                                                        | 253165_at   | -1.2 |
| DnaJ-like protein DnaJ-like protein, Phaseolus vulgaris, PATX:G1684851                                                                                     | 253125_at   | -1.2 |
| Inositol monophosphatase - like protein Mono-phosphatase, Streptomyces anulatus, X92429                                                                    | 252934_at   | -1.2 |
| hypothetical protein ; supported by cDNA: gi_15529203_gb_AY052226.1_                                                                                       | 252853_at   | -1.2 |
| putative protein AP2 domain containing protein RAP2.4,Arabidopsis thaliana                                                                                 | 252859_at   | -1.2 |
| cysteine proteinase contains similarity to cysteine proteinase RD21A (thiol protease) GI:435619, SP:P43297 from [Arabidopsis thaliana];supported           | 252692_at   | -1.2 |
| hypothetical protein ;supported by full-length cDNA: Ceres:35598.                                                                                          | 252231_at   | -1.2 |
| hypothetical protein ;supported by full-length cDNA: Ceres:93591.                                                                                          | 252165_at   | -1.2 |
| putative protein                                                                                                                                           | 251788_at   | -1.2 |
| synaptic glycoprotein SC2-like protein synaptic glycoprotein SC2 spliced variant, Homo sapiens, EMBL:AF038958;supported by full-length cDNA: C             | 251796_at   | -1.2 |
| cyclophilin-like protein ROC7, cyclophilin, Arabidopsis thaliana, EMBL:AF192490;supported by full-length cDNA: Ceres:94608.                                | 251772_at   | -1.2 |
| putative protein                                                                                                                                           | 251720_at   | -1.2 |
| DNA-binding protein-like DNA-binding protein 4 WRKY4 - Nicotiana tabacum, EMBL:AF193771;supported by full-length cDNA: Ceres:34847.                        | 251705_at   | -1.2 |
| putative protein hypothetical protein 238 - Porphyra purpurea, PIR:S73123                                                                                  | 251519_at   | -1.2 |
| putative protein various predicted proteins, Arabidopsis thaliana; supported by cDNA: gi_15982839_gb_AY057527.1_                                           | 250939_at   | -1.2 |
| putative protein predicted protein, Arabidopsis thaliana                                                                                                   | 250563_at   | -1.2 |
| mitochondrial phosphate translocator                                                                                                                       | 250206_at   | -1.2 |
| expressed protein contains similarity to ABC transporter, ATP-binding protein;supported by full-length cDNA: Ceres:151943.                                 | 250198_at   | -1.2 |
| CCR4-associated factor-like protein                                                                                                                        | 249928_at   | -1.2 |
| flavanone 3-hydroxylase-like protein ; supported by full-length cDNA: Ceres: 149654.                                                                       | 249754_at   | -1.2 |
| putative protein similar to unknown protein (pir S76575)                                                                                                   | 249685_at   | -1.2 |
| Nicotiana lesion-inducing like ; supported by full-length cDNA: Ceres: 327.                                                                                | 249159_at   | -1.2 |
| ethylene responsive element binding factor 2 (ATERF2) (sp O80338) ;supported by full-length cDNA: Ceres:3012.                                              | 248794_at   | -1.2 |
| transport protein particle component Bet3p-like protein ;supported by full-length cDNA: Ceres:122866.                                                      | 248127_at   | -1.2 |
| putative protein similar to unknown protein (pir T06631)                                                                                                   | 248074_at   | -1.2 |
| putative protein similar to unknown protein (pir T05049)                                                                                                   | 248044_at   | -1.2 |
| unknown protein                                                                                                                                            | 247959_at   | -1.2 |
| putative protein similar to unknown protein (pir T04261);supported by full-length cDNA: Ceres:6181.                                                        | 247930_at   | -1.2 |
| Expressed protein ; supported by full-length cDNA: Ceres: 267411.                                                                                          | 247882_at   | -1.2 |
| copper transport protein                                                                                                                                   | 247745_at   | -1.2 |
| actin depolymerizing factor 4 - like protein actin depolymerizing factor 4, Arabidopsis thaliana, EMBL:AF102822;supported by full-length cDNA: Cer         | 247656_at   | -1.2 |
| photosystem I reaction centre subunit psaN precursor (PSI-N) (sp P49107) ; supported by cDNA: gi_1237123_gb_U32176.1_ATU32176                              | 247320_at   | -1.2 |
| unknown protein ; supported by full-length cDNA: Ceres: 20274.                                                                                             | 247211_at   | -1.2 |
| prolyl 4-hydroxylase, alpha subunit-like protein                                                                                                           | 247124_at   | -1.2 |
| leucine-rich repeats containing protein grr1 - Glycine max. EMBL:AF019910                                                                                  | 246935_at   | -1.2 |

|                                                                                                                                                   |             |      |
|---------------------------------------------------------------------------------------------------------------------------------------------------|-------------|------|
| SigA binding protein ; supported by cDNA: gi_14596086_gb_AY042831.1_                                                                              | 246293_at   | -1.2 |
| ribosomal protein, chloroplast ribosomal protein PsCL18 precursor, chloroplast - Pisum sativum, PIR:R5PM18; supported by cDNA: gi_14596188_       | 246294_at   | -1.2 |
| putative protein non-consensus donor splice site GA at exon 1; predicted proteins, Arabidopsis thaliana; supported by cDNA: gi_16209695_gb_AY1    | 246135_at   | -1.2 |
| glutaredoxin ;supported by full-length cDNA: Ceres:115597.                                                                                        | 246092_at   | -1.2 |
| Expressed protein ; supported by cDNA: gi_15809953_gb_AY054245.1_                                                                                 | 245264_at   | -1.2 |
| F12A21.4 similar to IEP4 gb AAD11468.1                                                                                                            | 245215_at   | -1.2 |
| hypothetical protein predicted by genscan                                                                                                         | 245029_at   | -1.2 |
| photosystem II G protein                                                                                                                          | 245011_at   | -1.2 |
| putative expansin ;supported by full-length cDNA: Ceres:17353.                                                                                    | 267590_at   | -1.1 |
| unknown protein ;supported by full-length cDNA: Ceres:26701.                                                                                      | 267366_at   | -1.1 |
| hypothetical protein                                                                                                                              | 267293_at   | -1.1 |
| unknown protein                                                                                                                                   | 267239_at   | -1.1 |
| glutathione S-transferase identical to GB:D17673; supported by cDNA: gi_443698_dbj_D17673.1_ATHERD13                                              | 267154_at   | -1.1 |
| origin recognition complex protein identical to GB:U40269;supported by full-length cDNA: Ceres:42701.                                             | 267173_at   | -1.1 |
| unknown protein ;supported by full-length cDNA: Ceres:16403.                                                                                      | 266979_at   | -1.1 |
| putative AP2 domain transcription factor pFAM domain (PF00847)supported by full-length cDNA: Ceres:31044.                                         | 266820_at   | -1.1 |
| 3-isopropylmalate dehydratase, small subunit ; supported by cDNA: gi_16974632_gb_AY060594.1_                                                      | 266395_at   | -1.1 |
| unknown protein ;supported by full-length cDNA: Ceres:40283.                                                                                      | 266413_at   | -1.1 |
| unknown protein                                                                                                                                   | 266366_at   | -1.1 |
| putative rac GTPase activating protein                                                                                                            | 266324_at   | -1.1 |
| putative tropinone reductase                                                                                                                      | 266277_at   | -1.1 |
| unknown protein                                                                                                                                   | 266285_at   | -1.1 |
| unknown protein ;supported by full-length cDNA: Ceres:8247.                                                                                       | 265872_at   | -1.1 |
| unknown protein                                                                                                                                   | 265831_at   | -1.1 |
| hypothetical protein predicted by genscan                                                                                                         | 265840_at   | -1.1 |
| 60S ribosomal protein L27                                                                                                                         | 265730_at   | -1.1 |
| 40S ribosomal protein S12 ;supported by full-length cDNA: Ceres:13453.                                                                            | 265671_at   | -1.1 |
| putative replication protein A1 ;supported by full-length cDNA: Ceres:7536.                                                                       | 265695_at   | -1.1 |
| Expressed protein ; supported by cDNA: gi_13605516_gb_AF361584.1_AF361584                                                                         | 265597_at   | -1.1 |
| unknown protein                                                                                                                                   | 265317_at   | -1.1 |
| putative receptor protein kinase similar to brassinosteroid insensitive protein                                                                   | 265250_at   | -1.1 |
| putative ADP-ribosylation factor ; supported by cDNA: gi_13926231_gb_AF372875.1_AF372875                                                          | 265187_at   | -1.1 |
| unknown protein similar to ESTs gb T76678 and gb A1165001;supported by full-length cDNA: Ceres:251549.                                            | 265130_at   | -1.1 |
| hypothetical protein predicted by genefinder                                                                                                      | 265083_at   | -1.1 |
| hypothetical protein predicted by genemark.hmm;supported by full-length cDNA: Ceres:2118.                                                         | 264636_at   | -1.1 |
| hypothetical protein Contains similarity to Rattus AMP-activated protein kinase (gb X95577); supported by cDNA: gi_9965728_gb_AF250335.1_AF;      | 264625_at   | -1.1 |
| germin-like protein Identical to Arabidopsis germin-like protein, gi 1755178. Location of EST 180L10T7, gi 906417; supported by cDNA: gi_132654;  | 264506_at   | -1.1 |
| hypothetical protein predicted by graill                                                                                                          | 264379_at   | -1.1 |
| unknown protein Strong similarity to gb D14550 extracellular dermal glycoprotein (EDGP) precursor from Daucus carota. ESTs gb H37281, gb T44      | 264365_s_at | -1.1 |
| aromatic rich glycoprotein, putative similar to aromatic rich glycoprotein GI:1762428 from [Arabidopsis thaliana]; supported by cDNA: gi_1762583_ | 264315_at   | -1.1 |
| unknown protein ESTs gb T04610, gb N38459, gb T45174, gb R30481 and gb N64971 come from this gene;supported by full-length cDNA: Ceres:           | 264264_at   | -1.1 |
| unknown protein ;supported by full-length cDNA: Ceres:37537.                                                                                      | 264201_at   | -1.1 |
| putative nitrilase-associated protein Alternative splicing exists based on EST evidence                                                           | 264028_at   | -1.1 |
| Expressed protein ; supported by full-length cDNA: Ceres: 19643.                                                                                  | 264022_at   | -1.1 |
| Expressed protein ; supported by full-length cDNA: Ceres: 97088.                                                                                  | 263842_at   | -1.1 |
| putative sarcosine oxidase                                                                                                                        | 263788_at   | -1.1 |
| unknown protein ; supported by cDNA: gi_15451039_gb_AY054600.1_                                                                                   | 263715_at   | -1.1 |
| hypothetical protein predicted by genefinder                                                                                                      | 263674_at   | -1.1 |
| hypothetical protein predicted by genscan;supported by full-length cDNA: Ceres:113395.                                                            | 263629_at   | -1.1 |
| unknown protein similar to hypothetical protein GB:AAB81674;supported by full-length cDNA: Ceres:6280.                                            | 263582_at   | -1.1 |
| predicted protein ;supported by full-length cDNA: Ceres:28779.                                                                                    | 263410_at   | -1.1 |
| ADP-ribosylation factor 1 ;supported by full-length cDNA: Ceres:34414.                                                                            | 263321_at   | -1.1 |
| putative sugar transporter protein nearly identical to Arabidopsis sugar transporter, gi 1495273                                                  | 262797_at   | -1.1 |
| putative ubiquinol-cytochrome-c reductase Similar to gb X79273 cytochrome c reductase hinge protein subunit from Solanum tuberosum. ESTs gb       | 262593_at   | -1.1 |
| unknown protein identical to unknown protein GB:AAD55493 (Arabidopsis thaliana); supported by cDNA: gi_13358235_gb_AF325047.2_AF325047            | 262262_at   | -1.1 |
| hypothetical protein predicted by genemark.hmm;supported by full-length cDNA: Ceres:5052.                                                         | 262285_at   | -1.1 |
| allergen, putative similar to allergen (Ole e 1) GI:2465129 from [Olea europaea];supported by full-length cDNA: Ceres:22488.                      | 262195_at   | -1.1 |



|                                                                                                                                                       |             |      |
|-------------------------------------------------------------------------------------------------------------------------------------------------------|-------------|------|
| hypothetical protein predicted by genemark.hmm                                                                                                        | 262085_at   | -1.1 |
| cytochrome c oxidase subunit, putative similar to cytochrome c oxidase subunit Vb Gl:1841354 from [Oryza sativa];supported by full-length cDNA:       | 262048_at   | -1.1 |
| 50S ribosomal protein L21 chloroplast precursor (CL21) identical to GB:P51412 Gl:1710424 from [Arabidopsis thaliana]; supported by cDNA: gi_16        | 262029_at   | -1.1 |
| hypothetical protein predicted by genemark.hmm;supported by full-length cDNA: Ceres:119546.                                                           | 261951_at   | -1.1 |
| hypothetical protein predicted by genemark.hmm                                                                                                        | 261742_at   | -1.1 |
| helix-loop-helix protein homolog, putative similar to helix-loop-helix protein homolog GB:BAA87957 Gl:6520231 from [Arabidopsis thaliana]             | 261717_at   | -1.1 |
| Expressed protein ; supported by full-length cDNA: Ceres: 11759.                                                                                      | 261638_at   | -1.1 |
| RAS-related protein ARA-1 identical to SP:P19892 from [Arabidopsis thaliana] (Gene 76:313-319(1989))                                                  | 261252_at   | -1.1 |
| unknown protein ; supported by cDNA: gi_15450636_gb_AY052686.1_                                                                                       | 261193_at   | -1.1 |
| dihydrolipoamide S-acetyltransferase, putative similar to Gl:5881963 from (Arabidopsis thaliana) (Plant Physiol. 120 (2), 443-452 (1999));supportec   | 261165_at   | -1.1 |
| unknown protein                                                                                                                                       | 261143_at   | -1.1 |
| putative cytochrome c oxidase Vc subunit                                                                                                              | 260579_at   | -1.1 |
| unknown protein ;supported by full-length cDNA: Ceres:40573.                                                                                          | 260429_at   | -1.1 |
| putative ADP-ribosylation factor 1 nearly identical to ADP-ribosylation factor 1 GB:P36397 [Arabidopsis thaliana];supported by full-length cDNA: Cer  | 260305_at   | -1.1 |
| hypothetical protein predicted by genefinder                                                                                                          | 260205_at   | -1.1 |
| unknown protein ;supported by full-length cDNA: Ceres:33367.                                                                                          | 259955_s_at | -1.1 |
| unknown protein ;supported by full-length cDNA: Ceres:21305.                                                                                          | 259838_at   | -1.1 |
| putative isoprenylated protein similar to ATPF7 GB:AAD09511;supported by full-length cDNA: Ceres:39127.                                               | 259753_at   | -1.1 |
| thylakoid-bound ascorbate peroxidase identical to thylakoid-bound ascorbate peroxidase GB:CAA67426 [Arabidopsis thaliana];supported by full-len       | 259707_at   | -1.1 |
| unknown protein ; supported by full-length cDNA: Ceres: 13599.                                                                                        | 259660_at   | -1.1 |
| protein kinase, putative similar to Gl:7573596 from [Populus nigra]                                                                                   | 259671_at   | -1.1 |
| hypothetical protein                                                                                                                                  | 259530_at   | -1.1 |
| plasma membrane intrinsic protein 1c, putative similar to plasma membrane intrinsic protein 1c Gl:472875 from [Arabidopsis thaliana]                  | 259431_at   | -1.1 |
| putative cystathionine gamma-synthase similar to cystathionine gamma-synthase GB:AAB41235 from [Arabidopsis thaliana]; supported by cDNA: g           | 259279_at   | -1.1 |
| putative 60S ribosomal protein L22 similar to 60S ribosomal protein L22 GB:AAF02883; supported by full-length cDNA: Ceres: 8244.                      | 259112_at   | -1.1 |
| acyl carrier protein 1 precursor (ACP) identical to GB:P11829 [Arabidopsis thaliana]; supported by full-length cDNA: Ceres: 14291.                    | 259095_at   | -1.1 |
| unknown protein similar to hin1 GB:CAA68848 [Nicotiana tabacum]; supported by cDNA: gi_9502173_gb_AF264698.1_AF264698                                 | 259071_at   | -1.1 |
| unknown protein similar to unknown protein GB:AAD21471 [Arabidopsis thaliana]; supported by cDNA: gi_15810316_gb_AY056197.1_                          | 259072_at   | -1.1 |
| adenylate translocator identical to adenylate translocator GB:X65549 [Arabidopsis thaliana];supported by full-length cDNA: Ceres:36818.               | 258680_at   | -1.1 |
| S-adenosylmethionine decarboxylase identical to GB:Q96286 from [Arabidopsis thaliana]; supported by cDNA: gi_14596072_gb_AY042824.1_                  | 258500_at   | -1.1 |
| putative s-adenosylmethionine synthetase similar to S-ADENOSYLMETHIONINE SYNTHETASE GB:Q96552 from [Catharanthus roseus];supportec                    | 258415_at   | -1.1 |
| unknown protein similar to unknown protein GB:AAF30339 from [Arabidopsis thaliana];supported by full-length cDNA: Ceres:22328.                        | 258393_at   | -1.1 |
| protein kinase C-receptor/G-protein, putative similar to uranine nucleotide binding protein (G protein), beta polypeptide GB:NP_006089 [Homo sapi     | 258155_at   | -1.1 |
| hypothetical protein similar to CGI-18 protein GB:AAD27727 [Homo sapiens]                                                                             | 258049_at   | -1.1 |
| hypothetical protein                                                                                                                                  | 257875_at   | -1.1 |
| gamma tonoplast intrinsic protein nearly identical to gamma tonoplast intrinsic protein 2 (TIP2) GB:AF057137 [Arabidopsis thaliana]; supported by c   | 257313_at   | -1.1 |
| unknown protein ; supported by cDNA: gi_15146273_gb_AY049278.1_                                                                                       | 257272_at   | -1.1 |
| NADPH:quinone oxidoreductase (NQR) nearly identical to NADPH:quinone oxidoreductase (NQR) GB:AF145234 [Arabidopsis thaliana]; supported               | 257228_at   | -1.1 |
| serine acetyltransferase (Sat-1) identical to serine acetyltransferase (Sat-1) GB:U22964 [Arabidopsis thaliana] (Plant Mol. Biol. 30 (5), 1041-1049 ( | 257194_at   | -1.1 |
| disease resistance protein, putative similar to GB:AAD13301 from [Lycopersicon esculentum], contains Pfam profiles: PF00560 Leucine Rich Repe         | 257100_at   | -1.1 |
| ribosomal protein L27, putative similar to 60S RIBOSOMAL PROTEIN L27 GB:P41101 from [Solanum tuberosum];supported by full-length cDNA: C              | 256794_at   | -1.1 |
| unknown protein                                                                                                                                       | 256673_at   | -1.1 |
| unknown protein                                                                                                                                       | 256622_at   | -1.1 |
| membrane import protein, putative similar to membrane import protein GB:AAF20172 Gl:6636407 [Drosophila melanogaster]; supported by cDNA:             | 256628_at   | -1.1 |
| peroxidase, putative similar to peroxidase ATP26a GB:CAA72487 Gl:1890317 [Arabidopsis thaliana]; supported by cDNA: gi_14334599_gb_AY03               | 256578_at   | -1.1 |
| Expressed protein ; supported by cDNA: gi_15450408_gb_AY052305.1_                                                                                     | 256304_at   | -1.1 |
| phosphoglycerate kinase, putative similar to phosphoglycerate kinase [Nicotiana tabacum] Gl:1161600; supported by cDNA: gi_15810504_gb_AYC            | 256228_at   | -1.1 |
| mitogen-activated protein kinase, putative similar to mitogen-activated protein kinase Gl:5815410 from [Oryza sativa]; supported by cDNA: gi_1502     | 256075_at   | -1.1 |
| UDP-glucose glucosyltransferase, putative similar to UDP-glucose glucosyltransferase Gl:453245 from [Manihot esculenta];supported by full-length      | 256058_at   | -1.1 |
| hypothetical protein predicted by genscan+                                                                                                            | 255880_at   | -1.1 |
| unknown protein                                                                                                                                       | 255852_at   | -1.1 |
| unknown protein similar to beta-1,3-glucanase-like protein Gl:9758115 from [Arabidopsis thaliana];supported by full-length cDNA: Ceres:32195.         | 255779_at   | -1.1 |
| unknown protein similar to unknown protein Gl:6714347 from [Arabidopsis thaliana];supported by full-length cDNA: Ceres:103226.                        | 255733_at   | -1.1 |
| acidic ribosomal protein p1 similar to acidic ribosomal protein p1;supported by full-length cDNA: Ceres:26442.                                        | 255657_at   | -1.1 |
| putative DNA-binding protein similar to wild oat DNA-binding protein ABF2, GenBank accession number Z48431                                            | 255596_at   | -1.1 |
| protoporphyrinogen oxidase ; supported by cDNA: gi_14423413_gb_AF386944.1_AF386944                                                                    | 255537_at   | -1.1 |
| putative ribonucleoprotein similarity to ovarian RNA-binding protein and translational control factor (bruno)- Drosophila melanogaster,EMBL:DMU58     | 255411_at   | -1.1 |

|                                                                                                                                                 |           |      |
|-------------------------------------------------------------------------------------------------------------------------------------------------|-----------|------|
| putative xyloglucan endotransglycosylase ;supported by full-length cDNA: Ceres:17748.                                                           | 255433_at | -1.1 |
| putative protein hypothetical protein - Arabidopsis thaliana,PIR:F71409;supported by full-length cDNA: Ceres:22715.                             | 255243_at | -1.1 |
| putative protein                                                                                                                                | 255035_at | -1.1 |
| RING-H2 finger protein RHA1b ;supported by full-length cDNA: Ceres:37097.                                                                       | 254919_at | -1.1 |
| ammonium transport protein (AMT1) ; supported by cDNA: gi_14335079_gb_AY037219.1_                                                               | 254723_at | -1.1 |
| extensin-like protein extensin-like protein - maize, PIR2:S49915                                                                                | 254635_at | -1.1 |
| neoxanthin cleavage enzyme-like protein neoxanthin cleavage enzyme, Lycopersicon esculentum, PATX:E325797; supported by cDNA: gi_159837         | 254564_at | -1.1 |
| putative protein FKBP-type peptidyl-prolyl cis-trans isomerase,Synechocystis sp., PIR2:S75144                                                   | 254545_at | -1.1 |
| water channel - like protein plasma membrane intrinsic protein 1c, Arabidopsis thaliana, PIR2:S44083;supported by full-length cDNA: Ceres:3982. | 254239_at | -1.1 |
| PROTEIN TRANSPORT PROTEIN SEC61 GAMMA SUBUNIT -like PROTEIN TRANSPORT PROTEIN SEC61 GAMMA SUBUNIT, ORYZA SATIVA                                 | 254083_at | -1.1 |
| Expressed protein ; supported by cDNA: gi_15028040_gb_AY045877.1_                                                                               | 253827_at | -1.1 |
| putative protein ;supported by full-length cDNA: Ceres:10077.                                                                                   | 253814_at | -1.1 |
| putative protein hypothetical protein T25K17.20 - Arabidopsis thaliana,PIR2:T06005; supported by full-length cDNA: Ceres: 7308.                 | 253730_at | -1.1 |
| cytidine deaminase 6 (CDA6)                                                                                                                     | 253679_at | -1.1 |
| putative protein ;supported by full-length cDNA: Ceres:2508.                                                                                    | 253440_at | -1.1 |
| hypothetical protein ;supported by full-length cDNA: Ceres:35221.                                                                               | 253389_at | -1.1 |
| clathrin assembly protein AP19 homolog ;supported by full-length cDNA: Ceres:22906.                                                             | 253199_at | -1.1 |
| Expressed protein ; supported by full-length cDNA: Ceres: 17990.                                                                                | 253045_at | -1.1 |
| adenosine-5-phosphosulfate-kinase                                                                                                               | 252870_at | -1.1 |
| putative protein ;supported by full-length cDNA: Ceres:37341.                                                                                   | 252876_at | -1.1 |
| hypothetical protein                                                                                                                            | 252612_at | -1.1 |
| mitogen-activated protein kinase 3 ; supported by cDNA: gi_14423447_gb_AF386961.1_AF386961                                                      | 252592_at | -1.1 |
| Expressed protein ; supported by full-length cDNA: Ceres: 157151.                                                                               | 252412_at | -1.1 |
| putative protein bundle sheath defective protein 2 - Zea mays, EMBL:AF126742; supported by cDNA: gi_13877966_gb_AF370246.1_AF370246             | 252409_at | -1.1 |
| putative protein GMFP7 isoprenylated protein, Glycine max., gb:AAD09515;supported by full-length cDNA: Ceres:250092.                            | 252296_at | -1.1 |
| E2, ubiquitin-conjugating enzyme, putative UEV1Bs - Homo sapiens,PID:g2689608;supported by full-length cDNA: Ceres:16125.                       | 252059_at | -1.1 |
| dTDP-glucose 4-6-dehydratase -like protein dTDP-glucose 4-6-dehydratase, Cicer arietinum, EMBL:AJ275318 contains non-consensus AT donor s       | 251945_at | -1.1 |
| sugar-phosphate isomerase - like protein gutq/kpsf family sugar-p isomerase, Chlamydia pneumoniae, PIR:E72068;supported by full-length cDNA:    | 251855_at | -1.1 |
| pectate lyase - like protein pectate lyase, Musa acuminata, X92943                                                                              | 251864_at | -1.1 |
| beta-N-acetylhexosaminidase -like protein various beta-N-acetylhexosaminidases; supported by full-length cDNA: Ceres: 118286.                   | 251782_at | -1.1 |
| putative protein hypothetical protein At2g44080 - Arabidopsis thaliana, EMBL:AC004005                                                           | 251436_at | -1.1 |
| putative protein hypothetical protein At2g46330 - Arabidopsis thaliana, EMBL:AC006526;supported by full-length cDNA: Ceres:11394.               | 251281_at | -1.1 |
| putative protein nucleoid DNA-binding protein cnd41, chloroplast - Nicotiana tabacum, EMBL:D26015; supported by cDNA: gi_14532549_gb_AY03       | 251287_at | -1.1 |
| cytochrome c oxidase subunit 5c-like protein cytochrome c oxidase subunit 5c - Oryza sativa, EMBL:AB027123;supported by full-length cDNA: Cer   | 251220_at | -1.1 |
| shock protein SRC2-like shock protein SRC2 - Glycine max, PIR:T07080                                                                            | 251232_at | -1.1 |
| one helix protein (OHP) ;supported by full-length cDNA: Ceres:16704.                                                                            | 251031_at | -1.1 |
| putative protein predicted proteins, Archaeoglobus fulgidus, Synechocystis sp.,supported by full-length cDNA: Ceres:125255.                     | 250842_at | -1.1 |
| putative protein various predicted proteins, Arabidopsis thaliana                                                                               | 250435_at | -1.1 |
| putative protein                                                                                                                                | 250376_at | -1.1 |
| putative protein predicted proteins, Arabidopsis thaliana                                                                                       | 250353_at | -1.1 |
| putative protein hydroxyproline-rich glycoprotein, kidney bean, PIR:A29356                                                                      | 250323_at | -1.1 |
| Expressed protein ; supported by cDNA: gi_16649124_gb_AY059932.1_                                                                               | 250100_at | -1.1 |
| putative protein ;supported by full-length cDNA: Ceres:1198.                                                                                    | 250098_at | -1.1 |
| putative protein predicted proteins, Drosophila melanogaster;supported by full-length cDNA: Ceres:41525.                                        | 249988_at | -1.1 |
| putative protein glycine-rich protein GRP22, rape, PIR:S31415                                                                                   | 249969_at | -1.1 |
| conglutin gamma - like protein conglutin gamma precursor, Lupinus angustifolius, PIR:S21426; supported by cDNA: gi_15010797_gb_AY045700.1       | 249923_at | -1.1 |
| unknown protein                                                                                                                                 | 249726_at | -1.1 |
| glutamate--ammonia ligase ; supported by cDNA: gi_16226386_gb_AF428386.1_AF428386                                                               | 249581_at | -1.1 |
| 14-3-3 protein GF14psi (grf3/RC11) identical to 14-3-3 protein GF14 psi GI:1168200, SP:P42644; supported by cDNA: gi_166716_gb_L09110.1_A`      | 249514_at | -1.1 |
| putative protein similar to unknown protein (pir S75762)                                                                                        | 249519_at | -1.1 |
| dihydroxyacetone 3-phosphate reductase (dhaprd)                                                                                                 | 249366_at | -1.1 |
| unknown protein ;supported by full-length cDNA: Ceres:126660.                                                                                   | 249284_at | -1.1 |
| beta-1,3-glucanase-like protein ;supported by full-length cDNA: Ceres:11988.                                                                    | 249235_at | -1.1 |
| serine carboxypeptidase II-like ; supported by cDNA: gi_13605556_gb_AF361604.1_AF361604                                                         | 249216_at | -1.1 |
| Expressed protein ; supported by full-length cDNA: Ceres: 6893.                                                                                 | 249162_at | -1.1 |
| putative protein contains similarity to unknown protein (gb AAD21709.1); supported by cDNA: gi_15215714_gb_AY050386.1_                          | 249035_at | -1.1 |
| GDSL-motif lipase/hydrolase-like protein                                                                                                        | 248921_at | -1.1 |

|                                                                                                                                                          |           |      |
|----------------------------------------------------------------------------------------------------------------------------------------------------------|-----------|------|
| putative protein contains similarity to bHLH DNA-binding protein;supported by full-length cDNA: Ceres:35890.                                             | 248839_at | -1.1 |
| ATP citrate lyase ; supported by cDNA: gi_14334787_gb_AY035067.1_                                                                                        | 248608_at | -1.1 |
| putative protein similar to unknown protein (pir T08406)                                                                                                 | 248614_at | -1.1 |
| putative protein similar to unknown protein (sp P42404);supported by full-length cDNA: Ceres:15004.                                                      | 248348_at | -1.1 |
| putative protein contains similarity to GPI-anchored protein                                                                                             | 247996_at | -1.1 |
| nucleosome assembly protein                                                                                                                              | 247955_at | -1.1 |
| bis(5 -adenosyl)-triphosphatase-like; also similar to fragile histidine triad                                                                            | 247860_at | -1.1 |
| zinc finger protein - like dof6 zinc finger protein, Arabidopsis thaliana, PIR:T47501;supported by full-length cDNA: Ceres:20852.                        | 247625_at | -1.1 |
| protein transport protein subunit - like protein transport protein SEC61 beta subunit, Arabidopsis thaliana, SWISSPROT:S61B_ARATH                        | 247632_at | -1.1 |
| S-receptor kinase homolog 2 precursor S-receptor kinase homolog 2 precursor, Arabidopsis thaliana, PIR:S27754                                            | 247602_at | -1.1 |
| Cf-5 disease resistance protein - like Hcr2-0B, Lycopersicon esculentum, EMBL:AF053995                                                                   | 247569_at | -1.1 |
| putative protein predicted proteins, Arabidopsis thaliana; supported by cDNA: gi_13877822_gb_AF370174.1_AF370174                                         | 247407_at | -1.1 |
| unknown protein ;supported by full-length cDNA: Ceres:16323.                                                                                             | 247373_at | -1.1 |
| unknown protein ;supported by full-length cDNA: Ceres:25419.                                                                                             | 247149_at | -1.1 |
| senescence-associated protein almost identical to ketoconazole resistant protein GI:928938 from [Arabidopsis thaliana] ;supported by full-length cD      | 247107_at | -1.1 |
| putative protein hypothetical protein - Ricinus communis, EMBL:Z81012;supported by full-length cDNA: Ceres:1351.                                         | 246919_at | -1.1 |
| E2, ubiquitin-conjugating enzyme, putative ubiquitin-conjugating enzyme, Pichia pastoris, PIR:A53848; supported by full-length cDNA: Ceres: 1028         | 246862_at | -1.1 |
| nodulin - like protein early nodulin N93, Glycine max, EMBL:D13506;supported by full-length cDNA: Ceres:21669.                                           | 246863_at | -1.1 |
| ferrochelatase-I                                                                                                                                         | 246870_at | -1.1 |
| putative protein predicted proteins, Arabidopsis thaliana;supported by full-length cDNA: Ceres:38304.                                                    | 246792_at | -1.1 |
| CARBONIC ANHYDRASE 2 ; supported by cDNA: gi_13265565_gb_AF324712.2_AF324712                                                                             | 246596_at | -1.1 |
| putative protein predicted protein, Drosophila melanogaster                                                                                              | 246462_at | -1.1 |
| auxin-induced basic helix-loop-helix transcription factor, putative similar to auxin-induced basic helix-loop-helix transcription factor GI:5731257 from | 246398_at | -1.1 |
| RP19 gene for chloroplast ribosomal protein CL9 ;supported by full-length cDNA: Ceres:13554.                                                             | 246339_at | -1.1 |
| putative protein ;supported by full-length cDNA: Ceres:14064.                                                                                            | 245980_at | -1.1 |
| putative transcriptional co-activator (KIV1) ; supported by cDNA: gi_2997683_gb_AF053302.1_AF053302                                                      | 245896_at | -1.1 |
| putative c2h2 zinc finger transcription factor                                                                                                           | 245711_at | -1.1 |
| unknown protein ;supported by full-length cDNA: Ceres:24560.                                                                                             | 245665_at | -1.1 |
| ethylene responsive element binding factor 1 (frameshift ! ) ; supported by cDNA: gi_3434966_dbj_AB008103.1_AB008103                                     | 245252_at | -1.1 |
| unknown protein ;supported by full-length cDNA: Ceres:23203.                                                                                             | 245143_at | -1.1 |
| hypothetical protein                                                                                                                                     | 245019_at | -1.1 |
| hypothetical protein                                                                                                                                     | 244961_at | -1.1 |
| NADH dehydrogenase subunit                                                                                                                               | 244935_at | -1.1 |
| putative RNA-binding protein contains Procite RNP1 putative RNA-binding region, similar to GB:AAC33496; supported by cDNA: gi_13605870_gt                | 257413_at | -1.1 |
| hypothetical protein ;supported by full-length cDNA: Ceres:5.                                                                                            | 265479_at | -1.1 |
| OEP8 like protein                                                                                                                                        | 245514_at | -1.1 |
| Expressed protein ; supported by full-length cDNA: Ceres: 27620.                                                                                         | 267591_at | -1   |
| TCP1-chaperonin cofactor A isolog ;supported by full-length cDNA: Ceres:1853.                                                                            | 267494_at | -1   |
| putative squamosa-promoter binding protein ;supported by full-length cDNA: Ceres:10375.                                                                  | 267460_at | -1   |
| unknown protein ;supported by full-length cDNA: Ceres:8402.                                                                                              | 267370_at | -1   |
| putative malonyl-CoA:Acyl carrier protein transacylase ;supported by full-length cDNA: Ceres:299.                                                        | 267308_at | -1   |
| unknown protein                                                                                                                                          | 267230_at | -1   |
| unknown protein                                                                                                                                          | 267069_at | -1   |
| putative cytochrome P450 ;supported by full-length cDNA: Ceres:158108.                                                                                   | 266996_at | -1   |
| putative protein kinase contains a protein kinase domain profile (PDOC00100)                                                                             | 266946_at | -1   |
| acyl carrier protein identical to GB:L23574; supported by cDNA: gi_15450374_gb_AY052288.1_                                                               | 266890_at | -1   |
| unknown protein                                                                                                                                          | 266813_at | -1   |
| putative expansin Experimental evidence from Dr. Daniel Cosgrove at Penn State Univ. <dCosgrove@psu.edu>                                                 | 266770_at | -1   |
| unknown protein ;supported by full-length cDNA: Ceres:26967.                                                                                             | 266716_at | -1   |
| unknown protein ;supported by full-length cDNA: Ceres:10341.                                                                                             | 266483_at | -1   |
| hypothetical protein predicted by genefinder; supported by cDNA: gi_15215635_gb_AY050346.1_                                                              | 266463_at | -1   |
| putative cinnamoyl-CoA reductase                                                                                                                         | 266202_at | -1   |
| putative microtubule-associated protein ; supported by cDNA: gi_15724331_gb_AF412106.1_AF412106                                                          | 266106_at | -1   |
| Expressed protein ; supported by full-length cDNA: Ceres: 109069.                                                                                        | 266094_at | -1   |
| unknown protein                                                                                                                                          | 265883_at | -1   |
| putative integral membrane protein                                                                                                                       | 265713_at | -1   |
| cysteine proteinase contains similarity to cysteine protease SPCP1 GI:13491750 from [Ipomoea batatas]                                                    | 265665_at | -1   |

|                                                                                                                                                     |             |    |
|-----------------------------------------------------------------------------------------------------------------------------------------------------|-------------|----|
| cytochrome b5, putative similar to cytochrome b5 GI:4240120 from [Arabidopsis thaliana]; supported by cDNA: gi_15146311_gb_AY049297.1_              | 264926_at   | -1 |
| flowering signals mediating protein FT identical to flowering signals mediating protein FT GI:4903012 from [Arabidopsis thaliana]; supported by cDN | 264638_at   | -1 |
| putative auxin-induced protein, IAA12 similar to GB:S58498;supported by full-length cDNA: Ceres:40608.                                              | 264605_at   | -1 |
| adenine phosphoribosyltransferase 1, APRT identical to GB:P31166; similar to ESTs gb N65531, gb R90631, gb T21275, and gb AA713070;suppo            | 264439_at   | -1 |
| unknown protein                                                                                                                                     | 264385_at   | -1 |
| unknown protein                                                                                                                                     | 264172_at   | -1 |
| unknown protein                                                                                                                                     | 264173_at   | -1 |
| hypothetical protein predicted by genemark.hmm                                                                                                      | 264130_at   | -1 |
| putative auxin-regulated protein ;supported by full-length cDNA: Ceres:7141.                                                                        | 264021_at   | -1 |
| putative receptor-like protein kinase                                                                                                               | 263913_at   | -1 |
| unknown protein ;supported by full-length cDNA: Ceres:24885.                                                                                        | 263920_at   | -1 |
| unknown protein                                                                                                                                     | 263869_at   | -1 |
| putative cyclic nucleotide-regulated ion channel protein                                                                                            | 263777_at   | -1 |
| AtRer1B ;supported by full-length cDNA: Ceres:92908.                                                                                                | 263516_at   | -1 |
| unknown protein ;supported by full-length cDNA: Ceres:6899.                                                                                         | 263305_at   | -1 |
| aspartate-semialdehyde dehydrogenase, putative similar to aspartate-semialdehyde dehydrogenase SP:O31219 [Legionella pneumophila];support           | 262841_at   | -1 |
| hypothetical protein                                                                                                                                | 262661_s_at | -1 |
| oxidoreductase, putative contains Pfam profile: PF00671 Iron/Ascorbate oxidoreductase family                                                        | 262616_at   | -1 |
| receptor-like protein kinase, putative similar to receptor-like protein kinase GB:AA95353 GI:4008010 from [Arabidopsis thaliana]                    | 262507_at   | -1 |
| acyl CoA synthetase, putative similar to acyl CoA synthetase GI:1617267 from [Brassica napus]                                                       | 262414_at   | -1 |
| hypothetical protein predicted by genemark.hmm; supported by full-length cDNA: Ceres: 10855.                                                        | 262411_at   | -1 |
| auxin transport protein REH1, putative similar to auxin transport protein REH1 GI:3377509 from [Oryza sativa]; supported by cDNA: gi_5817300_gl     | 262263_at   | -1 |
| isocitrate dehydrogenase, putative similar to isocitrate dehydrogenase GI:166385 from [Medicago sativa];supported by full-length cDNA: Ceres:415    | 261920_at   | -1 |
| hypothetical protein contains similarity to prephenate dehydratase GI:1008717 from [Amycolatopsis methanolica]; supported by cDNA: gi_1581050z      | 261758_at   | -1 |
| unknown protein                                                                                                                                     | 261782_at   | -1 |
| unknown protein contains Pfam profile: PF00255 glutathione peroxidases;supported by full-length cDNA: Ceres:30238.                                  | 261530_at   | -1 |
| Expressed protein ; supported by full-length cDNA: Ceres: 14314.                                                                                    | 261439_at   | -1 |
| hypothetical protein predicted by genemark.hmm                                                                                                      | 261073_at   | -1 |
| ascorbate oxidase promoter-binding protein, putative similar to ascorbate oxidase promoter-binding protein GB:D45066 GI:853689 from [Cucurbita      | 260887_at   | -1 |
| unknown protein similar to unknown protein GB:AA67633 from [Arabidopsis thaliana];supported by full-length cDNA: Ceres:18194.                       | 260895_at   | -1 |
| plastid ribosomal protein L34 precursor, putative similar to plastid ribosomal protein L34 precursor GB:AAF64157 GI:7578860 from [Spinacia olerac   | 260898_at   | -1 |
| zinc finger protein, putative similar to zinc finger protein ID1 GB:AA18941 GI:3170601 from [Zea mays]                                              | 260776_at   | -1 |
| Expressed protein ; supported by full-length cDNA: Ceres: 17110.                                                                                    | 260685_at   | -1 |
| hypothetical protein predicted by genemark.hmm;supported by full-length cDNA: Ceres:95383.                                                          | 260651_at   | -1 |
| putative signal recognition particle protein 14kD, ATSRP14 ; supported by full-length cDNA: Ceres: 97249.                                           | 260569_at   | -1 |
| putative trypsin inhibitor ;supported by full-length cDNA: Ceres:85.                                                                                | 260547_at   | -1 |
| hypothetical protein predicted by genscan+                                                                                                          | 260277_at   | -1 |
| putative 3-isopropylmalate dehydrogenase similar to 3-ISOPROPYLMALATE DEHYDROGENASE PRECURSOR GB:P29102 from (Brassica napus                        | 260285_at   | -1 |
| 30S ribosomal protein S17, chloroplast precursor (CS17) identical to 30S ribosomal protein S17, chloroplast precursor GB:P16180 [Arabidopsis tha    | 260165_at   | -1 |
| unknown protein                                                                                                                                     | 260103_at   | -1 |
| putative RING zinc finger protein contains Pfam profile: PF00097 zinc finger, C3HC4 type (RING finger)                                              | 260065_at   | -1 |
| putative calmodulin-binding protein similar to calmodulin-binding protein GB:AAB37246 [Nicotiana tabacum]                                           | 260068_at   | -1 |
| hypothetical protein ;supported by full-length cDNA: Ceres:19640.                                                                                   | 259863_at   | -1 |
| unknown protein ;supported by full-length cDNA: Ceres:34166.                                                                                        | 259856_at   | -1 |
| photosystem I subunit VI precursor identical to photosystem I subunit VI precursor [Arabidopsis thaliana] GI:5734524;supported by full-length cDNA  | 259840_at   | -1 |
| auxin-induced protein, putative similar to SP:P33083 from [Glycine max]                                                                             | 259773_at   | -1 |
| unknown protein similar to phosphate translocators: glucose-6-phosphate/phosphate-translocator precursor GB:AA08524 [Zea mays], phosphate.          | 259713_at   | -1 |
| hypothetical protein                                                                                                                                | 259560_at   | -1 |
| unknown protein contains similarity to copper zinc superoxide dismutase GI:5689611 from (Arabidopsis thaliana); supported by cDNA: gi_15215657      | 259511_at   | -1 |
| putative APG protein similar to anter-specific proline-rich protein APG precursor SP:P40602 (Arabidopsis thaliana); contains Pfam profile: PF00657  | 259375_at   | -1 |
| unknown protein                                                                                                                                     | 259325_at   | -1 |
| hypothetical protein similar to F1N21.1 GB:AA95230 [Arabidopsis thaliana];supported by full-length cDNA: Ceres:28199.                               | 259198_at   | -1 |
| putative protein kinase similar to ATMRK1, an Arabidopsis protein kinase related to mammal mixed-lineage kinases and Raf protein kinases GB:BF      | 259163_at   | -1 |
| unknown protein similar to unknown protein GB:AA62889 [Arabidopsis thaliana];supported by full-length cDNA: Ceres:15153.                            | 259154_at   | -1 |
| unknown protein similar to GB:CAB05547 [Caenorhabditis elegans]                                                                                     | 259085_at   | -1 |
| heat-shock protein (At-hsc70-3) identical to (At-hsc70-3) (cytosolic Hsp70) GB:CAA76606 [Arabidopsis thaliana]; supported by cDNA: gi_15292924      | 258979_at   | -1 |
| putative dehydrogenase contains Pfam profiles: PF00106 short chain dehydrogenase, PF00678 short chain dehydrogenase reductase C-terminus;           | 258976_at   | -1 |

|                                                                                                                                                    |             |    |
|----------------------------------------------------------------------------------------------------------------------------------------------------|-------------|----|
| putative amino acid transporter protein similar to amino acid transport protein GB:AAB82307 [Arabidopsis thaliana]; contains Pfam profile: PF01490 | 258729_at   | -1 |
| putative pectinacetyltransferase similar to GB:CAA67728 from [Vigna radiata]; supported by cDNA: gi_15292826_gb_AY050847.1_                        | 258750_at   | -1 |
| unknown protein ;supported by full-length cDNA: Ceres:24905.                                                                                       | 258642_at   | -1 |
| unknown protein                                                                                                                                    | 258519_at   | -1 |
| ribosomal protein L29, putative similar to 60S ribosomal protein L29 GB:P25886 from [Rattus norvegicus]                                            | 258521_at   | -1 |
| unknown protein identical to unknown protein GB:AAF30301 from [Arabidopsis thaliana]; supported by cDNA: gi_16648934_gb_AY059837.1_                | 258472_at   | -1 |
| unknown protein                                                                                                                                    | 258418_at   | -1 |
| MtN3-like protein similar to MtN3 GB:CAA69976 from [Medicago truncatula]                                                                           | 258421_at   | -1 |
| AIG2-like protein similar to AIG2 protein GB:P54121 from [Arabidopsis thaliana];supported by full-length cDNA: Ceres:32718.                        | 258001_at   | -1 |
| monosaccharide transport protein, STP4 identical to GB:S25009 from [Arabidopsis thaliana]; supported by cDNA: gi_13605905_gb_AF367352.1_A          | 257939_at   | -1 |
| hypothetical protein predicted by genefinder;supported by full-length cDNA: Ceres:924.                                                             | 257858_at   | -1 |
| unknown protein                                                                                                                                    | 257868_at   | -1 |
| unknown protein                                                                                                                                    | 257828_at   | -1 |
| unknown protein ;supported by full-length cDNA: Ceres:20618.                                                                                       | 257710_at   | -1 |
| unknown protein ;supported by full-length cDNA: Ceres:30464.                                                                                       | 257279_at   | -1 |
| cyclopropane-fatty-acyl-phospholipid synthase, putative similar to cyclopropane-fatty-acyl-phospholipid synthase GB:P30010 [Escherichia coli]      | 257175_s_at | -1 |
| unknown protein ; supported by full-length cDNA: Ceres: 5176.                                                                                      | 257171_at   | -1 |
| unknown protein contains Pfam profile:PF00279 LTP:Plant lipid transfer protein family;supported by full-length cDNA: Ceres:19287.                  | 256933_at   | -1 |
| hypothetical protein, 5 partial                                                                                                                    | 256626_at   | -1 |
| ORF1, putative similar to ORF1 GI:457716 from (Arabidopsis thaliana); supported by cDNA: gi_16649160_gb_AY059950.1_                                | 256497_at   | -1 |
| unknown protein ;supported by full-length cDNA: Ceres:14433.                                                                                       | 256455_at   | -1 |
| integral membrane protein, putative similar to GI:1209755 from [Beta vulgaris] (Plant Physiol. 110 110 (2), 511-520 (1996)); supported by cDNA: gi | 256458_at   | -1 |
| unknown protein                                                                                                                                    | 256396_at   | -1 |
| unknown protein ; supported by full-length cDNA: Ceres: 2031.                                                                                      | 256342_at   | -1 |
| AP2 domain transcription factor, putative similar to AP2 domain transcription factor GI:4567204 from [Arabidopsis thaliana]                        | 256009_at   | -1 |
| ribosomal protein S18, putative similar to ribosomal protein S18 GI:38422 from [Homo sapiens]; supported by cDNA: Ceres:27800                      | 255977_at   | -1 |
| GDP-L-fucose synthetase, putative similar to GDP-L-fucose synthetase GI:6580725 from [Yersinia pseudotuberculosis];supported by full-length cD     | 255901_at   | -1 |
| putative NAM (no apical meristem)-like protein ; supported by cDNA: gi_15294215_gb_AF410299.1_AF410299                                             | 255794_at   | -1 |
| unknown protein ;supported by full-length cDNA: Ceres:37302.                                                                                       | 255719_at   | -1 |
| Expressed protein ; supported by full-length cDNA: Ceres: 18459.                                                                                   | 255633_at   | -1 |
| coded for by A. thaliana cDNA T43845 similar to auxin-induced protein                                                                              | 255645_at   | -1 |
| hypothetical protein similar to pectinesterase                                                                                                     | 255524_at   | -1 |
| nodulin-like protein nodulin gene MtN21 - Medicago truncatula, PID:e1172471;supported by full-length cDNA: Ceres:40485.                            | 255129_at   | -1 |
| arabinogalactan-protein homolog arabinogalactan-protein - Arabidopsis thaliana,PID:g3883126; supported by cDNA: gi_10880496_gb_AF195891.           | 255080_at   | -1 |
| rab7-like protein rab7 protein -Vigna aconitifolia,PIR2:S39567; supported by cDNA: gi_15718417_dbj_AB071851.1_AB071851                             | 255052_at   | -1 |
| putative protein various predicted proteins                                                                                                        | 254549_at   | -1 |
| putative protein similar to unknown protein (gb)AAC79139.1)                                                                                        | 254521_at   | -1 |
| adenine phosphoribosyltransferase (EC 2.4.2.7) - like protein adenine phosphoribosyltransferase, Triticum aestivum, T06263; supported by full-len  | 254328_at   | -1 |
| putative receptor protein kinase receptor protein kinase, Ipomoea trifida,PID:g836954                                                              | 253911_at   | -1 |
| Expressed protein ; supported by full-length cDNA: Ceres: 12935.                                                                                   | 253859_at   | -1 |
| hypothetical protein ;supported by full-length cDNA: Ceres:42155.                                                                                  | 253856_at   | -1 |
| putative beta-expansin/allergen protein soybean pollen allergen (cim1) protein - soybean, PIR2:S48032;supported by full-length cDNA: Ceres:3302    | 253815_at   | -1 |
| putative protein hypothetical protein - Arabidopsis thaliana, PID:g4337210                                                                         | 253746_at   | -1 |
| putative protein D-threonine dehydrogenase - Pseudomonas cruciviae, PID:d1035162 and to several 3-hydroxyisobutyrate dehydrogenases; suppo         | 253706_at   | -1 |
| putative protein hypothetical protein YDR438w, Saccharomyces cerevisiae, Pir2:S69718; supported by cDNA: gi_15982861_gb_AY057538.1_                | 253467_at   | -1 |
| putative protein phosphate/phosphoenolpyruvate translocator, Arabidopsis thaliana, ATU66321                                                        | 253427_at   | -1 |
| putative protein hypothetical protein F17H15.20 Arabidopsis thaliana chromosome II BAC F17H15, PID:g3643606                                        | 253401_at   | -1 |
| Expressed protein ; supported by full-length cDNA: Ceres: 39326.                                                                                   | 253384_at   | -1 |
| putative protein Cyanophora paradoxa cyanelle, predicted protein;supported by full-length cDNA: Ceres:2912.                                        | 253197_at   | -1 |
| RING-H2 finger protein RHA3b ;supported by full-length cDNA: Ceres:31493.                                                                          | 253140_at   | -1 |
| ras-related small GTP-binding protein ras-related small GTP-binding protein Rho1Ps, garden pea, Pir2:A47525;supported by full-length cDNA: Cer     | 253118_at   | -1 |
| ribosomal - like protein ribosomal protein L12, Liberobacter africanum, U09675;supported by full-length cDNA: Ceres:41011.                         | 253058_at   | -1 |
| putative protein phosphatase-2c protein phosphatase-2c (PP2C) - Mesembryanthemum crystallinum, PID:g3608412                                        | 252992_at   | -1 |
| glycine-rich protein 2 (GRP2) ; supported by cDNA: gi_14326486_gb_AF385696.1_AF385696                                                              | 252957_at   | -1 |
| extensin - like protein proline-rich protein, Solanum tuberosum, AJ000997;supported by full-length cDNA: Ceres:2315.                               | 252971_at   | -1 |
| cinnamyl-alcohol dehydrogenase CAD1 ;supported by full-length cDNA: Ceres:34593.                                                                   | 252943_at   | -1 |
| cytochrome P450 - like protein cytochrome P450, Sinapis alba, AF069494; supported by cDNA: gi_15028134_gb_AY046017.1_                              | 252827_at   | -1 |

|                                                                                                                                                     |             |    |
|-----------------------------------------------------------------------------------------------------------------------------------------------------|-------------|----|
| histone H2B -like protein histone H2B1, upland cotton, PIR:T09722;supported by full-length cDNA: Ceres:10517.                                       | 252560_at   | -1 |
| putative protein mitochondrial ATP SYNTHASE 6 KD SUBUNIT - Solanum tuberosum, SWISSPROT:P80497                                                      | 252524_at   | -1 |
| phosphoprotein phosphatase ;supported by full-length cDNA: Ceres:32787.                                                                             | 252471_at   | -1 |
| GTP-binding protein Rab11 ; supported by full-length cDNA: Ceres: 35596.                                                                            | 252472_at   | -1 |
| signal recognition particle subunit 9 - like signal recognition particle subunit 9, Zea mays, EMBL:Y10117;supported by full-length cDNA: Ceres:146; | 252295_at   | -1 |
| putative protein sugar transporter 2, Drosophila melanogaster, EMBL:AF199484                                                                        | 252308_at   | -1 |
| putative protein predicted protein, Arabidopsis thaliana                                                                                            | 252250_at   | -1 |
| anthranilate N-hydroxycinnamoyl/benzoyltransferase - like protein anthranilate N-hydroxycinnamoyl/benzoyltransferase, Dianthus caryophyllus         | 252199_at   | -1 |
| LS1-like protein AT-LS1 product - Arabidopsis thaliana, EMBL:X58827;supported by full-length cDNA: Ceres:107294.                                    | 252076_at   | -1 |
| inorganic pyrophosphatase -like protein inorganic pyrophosphatase, Solanum tuberosum, PIR:T07399;supported by full-length cDNA: Ceres:40186         | 251961_at   | -1 |
| putative protein several hypothetical Na(+)/H(+) antiporter                                                                                         | 251906_at   | -1 |
| histone H4-like protein several histone H4 proteins;supported by full-length cDNA: Ceres:13571.                                                     | 251924_at   | -1 |
| putative protein several hypothetical proteins; supported by cDNA: gi_13878168_gb_AF370347.1_AF370347                                               | 251930_at   | -1 |
| putative protein GATA transcription factor 3, Arabidopsis thaliana, Y13650; supported by cDNA: gi_15724333_gb_AF412107.1_AF412107                   | 251861_at   | -1 |
| ribosomal L23a - like protein various ribosomal L23a proteins;supported by full-length cDNA: Ceres:17531.                                           | 251783_at   | -1 |
| putative protein ;supported by full-length cDNA: Ceres:12522.                                                                                       | 251640_at   | -1 |
| putative protein various predicted proteins, Arabidopsis thaliana;supported by full-length cDNA: Ceres:104796.                                      | 251406_at   | -1 |
| Expressed protein ; supported by full-length cDNA: Ceres: 42545.                                                                                    | 251409_at   | -1 |
| tRNA isopentenyl transferase -like protein tRNA isopentenyl transferase, Arabidopsis thaliana, EMBL:AF109376; supported by cDNA: gi_14278981        | 251154_at   | -1 |
| putative protein                                                                                                                                    | 250980_at   | -1 |
| putative protein ; supported by cDNA: gi_15724319_gb_AF412100.1_AF412100                                                                            | 250929_at   | -1 |
| putative protein                                                                                                                                    | 250948_at   | -1 |
| putative protein                                                                                                                                    | 250881_at   | -1 |
| phosphate/phosphoenolpyruvate translocator protein-like                                                                                             | 250743_at   | -1 |
| WD-repeat protein-like                                                                                                                              | 250584_at   | -1 |
| serine-type carboxypeptidase II-like protein carboxypeptidase D - Triticum aestivum, PIR:A29639; supported by cDNA: gi_13877962_gb_AF37024-         | 250517_at   | -1 |
| S-adenosylmethionine:2-demethylmenaquinone methyltransferase-like protein ; supported by full-length cDNA: Ceres: 13819.                            | 250129_at   | -1 |
| synaptobrevin-like protein                                                                                                                          | 249930_at   | -1 |
| DegP protease contains similarity to DegP protease precursor GI:2565436 from [Arabidopsis thaliana]                                                 | 249421_at   | -1 |
| hypothetical protein                                                                                                                                | 249355_at   | -1 |
| putative protein predicted proteins, Arabidopsis thaliana;supported by full-length cDNA: Ceres:16724.                                               | 249375_at   | -1 |
| putative protein similar to unknown protein (pir  C71410)                                                                                           | 249118_at   | -1 |
| serine/threonine protein kinase-like protein                                                                                                        | 248934_at   | -1 |
| phosphate/triose-phosphate translocator precursor (gb AAC83815.1) ;supported by full-length cDNA: Ceres:36058.                                      | 248886_at   | -1 |
| peptidyl-prolyl cis-trans isomerase-like protein ;supported by full-length cDNA: Ceres:143222.                                                      | 248664_at   | -1 |
| unknown protein ; supported by cDNA: gi_14326507_gb_AF385707.1_AF385707                                                                             | 248624_at   | -1 |
| nodulin-like protein ; supported by cDNA: gi_14532599_gb_AY039924.1_                                                                                | 248521_s_at | -1 |
| putative protein similar to unknown protein (emb CAA71173.1)                                                                                        | 248321_at   | -1 |
| putative protein strong similarity to unknown protein (pir T05748); supported by cDNA: gi_15010657_gb_AY045630.1_                                   | 248177_at   | -1 |
| glucose-6-phosphate/phosphate translocator ;supported by full-length cDNA: Ceres:26107.                                                             | 248144_at   | -1 |
| unknown protein ;supported by full-length cDNA: Ceres:38464.                                                                                        | 248145_at   | -1 |
| ubiquitin-like protein                                                                                                                              | 248092_at   | -1 |
| wax synthase-like protein                                                                                                                           | 248080_at   | -1 |
| NOI protein, nitrate-induced                                                                                                                        | 248025_at   | -1 |
| 60S acidic ribosomal protein P3 ; supported by full-length cDNA: Ceres: 8695.                                                                       | 247900_at   | -1 |
| putative protein similar to unknown protein (pir D64592);supported by full-length cDNA: Ceres:113904.                                               | 247881_at   | -1 |
| GTP-binding protein - like GTP-binding protein, garden pea, PIR:T06447                                                                              | 247597_at   | -1 |
| putative protein                                                                                                                                    | 247486_at   | -1 |
| putative protein predicted proteins, Arabidopsis thaliana                                                                                           | 247394_at   | -1 |
| Arac10 ; supported by cDNA: gi_3702963_gb_AF079485.1_AF079485                                                                                       | 247405_at   | -1 |
| unknown protein                                                                                                                                     | 247415_at   | -1 |
| putative protein strong similarity to unknown protein (emb CAB76911.1)                                                                              | 247362_at   | -1 |
| glutamate-tRNA ligase ; supported by cDNA: gi_11078545_gb_AF241841.1_AF241841                                                                       | 247319_at   | -1 |
| 40S ribosomal protein S28 (sp P34789) ;supported by full-length cDNA: Ceres:36501.                                                                  | 247267_at   | -1 |
| ZW10-like protein ; supported by cDNA: gi_14334941_gb_AY035144.1_                                                                                   | 247261_at   | -1 |
| invertase inhibitor homolog (emb CAA73335.1) ;supported by full-length cDNA: Ceres:25884.                                                           | 247246_at   | -1 |
| CLE21, putative CLAVATA3/ESR-Related 21 (CLE21)                                                                                                     | 247254_at   | -1 |

|                                                                                                                                                       |             |      |
|-------------------------------------------------------------------------------------------------------------------------------------------------------|-------------|------|
| putative protein contains similarity to unknown protein (gb AAF18680.1)                                                                               | 247125_at   | -1   |
| SCARECROW gene regulator                                                                                                                              | 247057_at   | -1   |
| cyclin D3-like protein ;supported by full-length cDNA: Ceres:36467.                                                                                   | 247034_at   | -1   |
| ADP-ribosylation factor-like protein ;supported by full-length cDNA: Ceres:35979.                                                                     | 247008_at   | -1   |
| putative protein predicted proteins, Arabidopsis thaliana and Oryza sativa                                                                            | 246822_at   | -1   |
| 60S ribosomal protein L22 - like ribosomal protein L22 (cytosolic), Rattus norvegicus, PIR:S52084; supported by full-length cDNA: Ceres: 19722.       | 246745_at   | -1   |
| putative protein ; supported by cDNA: gi_14532675_gb_AY039962.1_                                                                                      | 246749_at   | -1   |
| cytochrome P450 ; supported by cDNA: gi_3164141_dbj_D78606.1_D78606                                                                                   | 246620_at   | -1   |
| copper amine oxidase, putative similar to copper amine oxidase GI:685197 from [Pisum sativum]                                                         | 246601_at   | -1   |
| plant adhesion molecule 1 (PAM1) ;supported by full-length cDNA: Ceres:39585.                                                                         | 246482_at   | -1   |
| putative protein with poly glutamic acid stretch hypothetical protein F16B3.13 - Arabidopsis thaliana, EMBL:AC021640; supported by full-length cDNA   | 246487_at   | -1   |
| minor allergen ;supported by full-length cDNA: Ceres:35084.                                                                                           | 246201_at   | -1   |
| dynein light chain - like protein dynein light chain LC6, Anthocidaris crassispina, EMBL:AB004830                                                     | 246144_at   | -1   |
| putative protein predicted protein At2g25260 - Arabidopsis thaliana, EMBL:AC007070;supported by full-length cDNA: Ceres:6674.                         | 245853_at   | -1   |
| light-harvesting complex protein similar to light-harvesting complex protein GI:22752 from [Pinus sylvestris];supported by full-length cDNA: Ceres:41 | 245806_at   | -1   |
| histone H2A, putative similar to histone H2A GI:9758956 from [Arabidopsis thaliana]; supported by cDNA: gi_13877850_gb_AF370188.1_AF37018             | 245750_at   | -1   |
| extensin like protein                                                                                                                                 | 245479_at   | -1   |
| Lil3 protein ;supported by full-length cDNA: Ceres:29150.                                                                                             | 245354_at   | -1   |
| hypothetical protein ; supported by cDNA: gi_15292862_gb_AY050865.1_                                                                                  | 245290_at   | -1   |
| putative synaptobrevin ;supported by full-length cDNA: Ceres:2443.                                                                                    | 245167_s_at | -1   |
| PSII I protein                                                                                                                                        | 245023_at   | -1   |
| PSI I protein                                                                                                                                         | 245017_at   | -1   |
| ribosomal protein L20                                                                                                                                 | 244970_at   | -1   |
| PSII 47KDa protein                                                                                                                                    | 244972_at   | -1   |
| Expressed protein ; supported by full-length cDNA: Ceres: 970.                                                                                        | 249721_at   | -1   |
| putative carboxypeptidase ; supported by cDNA: gi_15724217_gb_AF412049.1_AF412049                                                                     | 264071_at   | -1   |
| protein kinase, putative similar to many predicted protein kinases                                                                                    | 261339_at   | -1   |
| unknown protein predicted by genscan; similar to GP 9826 X07453; supported by full-length cDNA: Ceres: 12267.                                         | 267637_at   | -0.9 |
| Expressed protein ; supported by cDNA: gi_15724149_gb_AF411777.1_AF411777                                                                             | 267578_at   | -0.9 |
| hypothetical protein predicted by genfinder                                                                                                           | 267586_at   | -0.9 |
| hypothetical protein predicted by genscan                                                                                                             | 267057_at   | -0.9 |
| unknown protein ; supported by cDNA: gi_16323164_gb_AY057686.1_                                                                                       | 267084_at   | -0.9 |
| hypothetical protein predicted by genscan                                                                                                             | 267019_at   | -0.9 |
| 60S ribosomal protein L35 ;supported by full-length cDNA: Ceres:11583.                                                                                | 266980_at   | -0.9 |
| phytoeyanin identical to GB:U90428; supported by full-length cDNA: Ceres: 19760.                                                                      | 266884_at   | -0.9 |
| unknown protein ; supported by cDNA: gi_14423465_gb_AF386970.1_AF386970                                                                               | 266887_at   | -0.9 |
| Expressed protein ; supported by full-length cDNA: Ceres: 124634.                                                                                     | 266808_at   | -0.9 |
| unknown protein                                                                                                                                       | 266799_at   | -0.9 |
| predicted by genfinder and genscan                                                                                                                    | 266742_at   | -0.9 |
| putative chloroplast RNA binding protein precursor ; supported by cDNA: gi_14596022_gb_AY042799.1_                                                    | 266642_at   | -0.9 |
| E2, ubiquitin-conjugating enzyme 6 (UBC6) identical to gi 431267, SP:P42750, PIR:S52661; contains a ubiquitin-conjugating enzymes active site (I      | 266604_at   | -0.9 |
| unknown protein ; supported by cDNA: gi_15081683_gb_AY048234.1_                                                                                       | 266521_at   | -0.9 |
| unknown protein                                                                                                                                       | 266512_at   | -0.9 |
| unknown protein ; supported by cDNA: gi_15912210_gb_AY056383.1_                                                                                       | 266479_at   | -0.9 |
| unknown protein ; supported by cDNA: gi_16649150_gb_AY059945.1_                                                                                       | 266481_at   | -0.9 |
| 60S acidic ribosomal protein P2 ;supported by full-length cDNA: Ceres:36076.                                                                          | 266256_at   | -0.9 |
| unknown protein ;supported by full-length cDNA: Ceres:114031.                                                                                         | 266167_at   | -0.9 |
| hypothetical protein predicted by genscan;supported by full-length cDNA: Ceres:9149.                                                                  | 265823_at   | -0.9 |
| unknown protein ; supported by cDNA: gi_14596214_gb_AY042895.1_                                                                                       | 265798_at   | -0.9 |
| putative ribose 5-phosphate isomerase ; supported by cDNA: gi_15809809_gb_AY054172.1_                                                                 | 265742_at   | -0.9 |
| unknown protein ;supported by full-length cDNA: Ceres:27566.                                                                                          | 265386_at   | -0.9 |
| auxin-regulated protein (IAA8) ;supported by full-length cDNA: Ceres:37274.                                                                           | 265319_at   | -0.9 |
| unknown protein ; supported by full-length cDNA: Ceres: 39285.                                                                                        | 265219_at   | -0.9 |
| 60S ribosomal protein L24 ;supported by full-length cDNA: Ceres:14564.                                                                                | 265210_at   | -0.9 |
| putative 3-oxoacyl [acyl-carrier protein] reductase similar to proteins from several bacterial species, similar to ESTs emb Z37189, gb H74525, gb 37  | 265026_at   | -0.9 |
| unknown protein contains Pfam profile:PF01762 Galactosyltransferase                                                                                   | 264978_at   | -0.9 |
| putative calcium-dependent protein kinase (U90439) similar to ESTs gb T46119, gb H76837, and gb H36948; supported by cDNA: gi_6318612_gb.             | 264783_at   | -0.9 |

|                                                                                                                                                      |             |      |
|------------------------------------------------------------------------------------------------------------------------------------------------------|-------------|------|
| putative cytochrome C strong similarity to GB:P00050 and GB:CAB39628; supported by full-length cDNA: Ceres: 31770.                                   | 264727_at   | -0.9 |
| putative 2,3-bisphosphoglycerate-independent phosphoglycerate mutase Strong similarity to R. communis phosphoglycerate mutase (gb)X70652).           | 264668_at   | -0.9 |
| putative RAS-related protein, RAB11C Strong similarity to A. thaliana ara-2 (gb)ATHARA2). ESTs gb ATTS2483.gb ATTS2484.gb AA042159 come              | 264669_at   | -0.9 |
| hypothetical protein predicted by genefinder;supported by full-length cDNA: Ceres:26961.                                                             | 263999_at   | -0.9 |
| En/Spm-like transposon protein related to En/Spm transposon family of maize;supported by full-length cDNA: Ceres:41214.                              | 263979_at   | -0.9 |
| hypothetical protein predicted by genefinder;supported by full-length cDNA: Ceres:2576.                                                              | 263929_at   | -0.9 |
| Expressed protein ; supported by full-length cDNA: Ceres: 267559.                                                                                    | 263772_at   | -0.9 |
| putative 40S ribosomal protein S15 Strong similarity to Oryza 40S ribosomal protein S15. ESTs gb R29788.gb ATTS0365 come from this gene; sup         | 263667_at   | -0.9 |
| unknown protein                                                                                                                                      | 263438_at   | -0.9 |
| 60S ribosomal protein L14 ;supported by full-length cDNA: Ceres:15198.                                                                               | 263372_at   | -0.9 |
| putative snRNP splicing factor ;supported by full-length cDNA: Ceres:97480.                                                                          | 263332_at   | -0.9 |
| unknown protein ; supported by cDNA: gi_15982806_gb_AY057510.1_                                                                                      | 263298_at   | -0.9 |
| putative vacuolar proton-ATPase 16 kDa proteolipid identical to GB:L44581                                                                            | 263267_at   | -0.9 |
| unknown protein                                                                                                                                      | 263247_at   | -0.9 |
| unknown protein ;supported by full-length cDNA: Ceres:39571.                                                                                         | 263180_at   | -0.9 |
| spore germination protein c2 similar to 2-hexaprenyl-1,4-naphthoquinone methyltransferase GB:BAA25267 GI:2982680 from [Micrococcus luteus]           | 263044_at   | -0.9 |
| alcohol dehydrogenase, putative similar to alcohol dehydrogenase GI:551256 from [Nicotiana tabacum]                                                  | 262870_at   | -0.9 |
| putative lipase similar to gb)X02844 lipase precursor from Staphylococcus hyicus. ESTs gb A1239406 and gb T76725 come from this gene                 | 262786_at   | -0.9 |
| phosphoribosyl diphosphate synthase identical to phosphoribosyl diphosphate synthase GI:4902470 from [Arabidopsis thaliana]; supported by cDN        | 262762_at   | -0.9 |
| unknown protein location of ESTs 144D22XP 3 , gb AA404877 and 144D22T7, gb T75757;supported by full-length cDNA: Ceres:5665.                         | 262612_at   | -0.9 |
| unknown protein ; supported by cDNA: gi_15215593_gb_AY050325.1_                                                                                      | 262634_at   | -0.9 |
| unknown protein Location of est 136A23T7 (gb T45563); supported by full-length cDNA: Ceres: 28177.                                                   | 262539_at   | -0.9 |
| hypothetical protein similar to hypothetical protein GB:AAF24576 GI:6692111 from [Arabidopsis thaliana]                                              | 262329_at   | -0.9 |
| unknown protein similar to hypothetical protein GB:AAF24562 GI:6692097 from [Arabidopsis thaliana]; supported by cDNA: gi_15010675_gb_AY04           | 262342_at   | -0.9 |
| serine threonine kinase, putative similar to GB:CAA73067 from (Sorghum bicolor) (Plant Mol. Biol. 36 (4), 529-539 (1998)); supported by cDNA: gi_    | 262244_at   | -0.9 |
| AP2 domain containing protein, putative similar to AP2 domain containing protein GI:2281633 from [Arabidopsis thaliana]; supported by cDNA: gi_      | 262135_at   | -0.9 |
| somatic embryogenesis receptor-like kinase, putative similar to somatic embryogenesis receptor-like kinase GI:2224910 from [Daucus carota];supp      | 262158_at   | -0.9 |
| plastid ribosomal protein S6, putative similar to plastid ribosomal protein S6 precursor GB:AAF64311 GI:7582401 from [Spinacia oleracea]; support    | 261954_at   | -0.9 |
| serine/threonine kinase, putative similar to serine/threonine kinase GI:2181189 from [Brassica oleracea]                                             | 261873_at   | -0.9 |
| unknown protein ; supported by full-length cDNA: Ceres: 32430.                                                                                       | 261791_at   | -0.9 |
| cinnamoyl CoA reductase, putative similar to cinnamoyl CoA reductase GI:2058310 from [Eucalyptus gunnii]; supported by full-length cDNA: Ceres:      | 261792_at   | -0.9 |
| calreticulin, putative similar to calreticulin GB:AAC49697 GI:2052383 from [Arabidopsis thaliana]; supported by cDNA: gi_2052382_gb_U66345.1_        | 261692_at   | -0.9 |
| ribonucleoprotein, putative similar to 33 KDA RIBONUCLEOPROTEIN GB:P19684 from [Nicotiana glauca];supported by full-length cDNA: Ceres               | 261577_at   | -0.9 |
| histone H4 identical to GB:M36659 from [Zea mays] (Plant Physiol. Biochem. 25, 235-247 (1987));supported by full-length cDNA: Ceres:27686.           | 261408_s_at | -0.9 |
| unknown protein ;supported by full-length cDNA: Ceres:151637.                                                                                        | 261407_at   | -0.9 |
| Expressed protein ; supported by full-length cDNA: Ceres: 21406.                                                                                     | 261254_at   | -0.9 |
| unknown protein ;supported by full-length cDNA: Ceres:207684.                                                                                        | 261201_at   | -0.9 |
| vacuolar ATP synthase subunit C, putative similar to GB:AAF20146 from [Arabidopsis thaliana] (Genes Dev. (1999) In press); supported by cDNA:        | 261210_at   | -0.9 |
| tubulin alpha-2/alpha-4 chain identical to SP:P29510 from [Arabidopsis thaliana]; supported by cDNA: gi_16648843_gb_AY058199.1_                      | 261129_at   | -0.9 |
| hypothetical protein predicted by genemark.hmm;supported by full-length cDNA: Ceres:19718.                                                           | 260871_at   | -0.9 |
| unknown protein similar to hypothetical protein GB:CAB10239 GI:2244816 from [Arabidopsis thaliana]; supported by full-length cDNA: Ceres: 4905.      | 260843_at   | -0.9 |
| fructose 1,6-bisphosphatase, putative similar to cytosolic fructose-1,6-bisphosphatase GB:AAD28755 GI:4741918 from [Musa acuminata]                  | 260837_at   | -0.9 |
| unknown protein                                                                                                                                      | 260818_at   | -0.9 |
| serine carboxypeptidase precursor, putative similar to GB:AAD42963 from [Matricaria chamomilla]                                                      | 260739_at   | -0.9 |
| polyphosphoinositide binding protein, putative similar to GB:AAB94598 from [Glycine max]; supported by cDNA: gi_16930446_gb_AF419577.1_AF            | 260604_at   | -0.9 |
| biotin synthase (Bio B) ;supported by full-length cDNA: Ceres:42038.                                                                                 | 260548_at   | -0.9 |
| putative trypsin inhibitor ; supported by cDNA: gi_15292710_gb_AY050789.1_                                                                           | 260551_at   | -0.9 |
| unknown protein ;supported by full-length cDNA: Ceres:17921.                                                                                         | 260441_at   | -0.9 |
| hypothetical protein similar to GB:AAB61488 [Arabidopsis thaliana];supported by full-length cDNA: Ceres:34864.                                       | 260411_at   | -0.9 |
| putative aminolevulinic acid dehydratase similar to aminolevulinic acid dehydratase GB:1097877 [Lycopersicon esculentum]; supported by cDNA: gi_1193 | 260370_at   | -0.9 |
| unknown protein contains two Kelch motifs; supported by full-length cDNA: Ceres: 32885.                                                              | 260287_at   | -0.9 |
| nodulin-like protein similar to nodule-specific protein Nlj70 GB:AAC39500 from (Lotus japonicus); supported by cDNA: gi_14334879_gb_AY035113.        | 260288_at   | -0.9 |
| putative histone H2A similar to histone H2A GB:CAA73155 from [Arabidopsis thaliana]; supported by full-length cDNA: Ceres: 10668.                    | 260154_at   | -0.9 |
| unknown protein ;supported by full-length cDNA: Ceres:111031.                                                                                        | 260003_at   | -0.9 |
| nodulin-like protein similar to nodulin GB:P16313 [Glycine max]                                                                                      | 259871_at   | -0.9 |
| blue copper protein, putative similar to GI:562778 from [Pisum sativum] (Thesis (1994) BIOLOGICAL SCIENCES, DURHAM UNIVERSITY); suppo                | 259801_at   | -0.9 |
| unknown protein                                                                                                                                      | 259546_at   | -0.9 |



|                                                                                                                                                            |             |      |
|------------------------------------------------------------------------------------------------------------------------------------------------------------|-------------|------|
| hypothetical protein ; supported by cDNA: gi_14532585_gb_AY039917.1_                                                                                       | 259561_at   | -0.9 |
| putative mitochondrial processing peptidase alpha subunit similar to mitochondrial processing peptidase GB:X66284 (Solanum tuberosum); suppo               | 259326_at   | -0.9 |
| putative 2-cys peroxiredoxin BAS1 precursor (thiol-specific antioxidant protein) similar to 2-cys peroxiredoxin BAS1 precursor (thiol-specific antioxidant | 259237_at   | -0.9 |
| unknown protein                                                                                                                                            | 259250_at   | -0.9 |
| putative thylakoid lumen rotamase similar to thylakoid lumen rotamase GB:CAA72792 [Spinacia oleracea];supported by full-length cDNA: Ceres:38;             | 259193_at   | -0.9 |
| unknown protein ;supported by full-length cDNA: Ceres:22225.                                                                                               | 259104_at   | -0.9 |
| unknown protein similar to nodule-specific protein Nlj70 GB:AAC39500 (Lotus japonicus)                                                                     | 259005_at   | -0.9 |
| unknown protein ;supported by full-length cDNA: Ceres:97.                                                                                                  | 258875_at   | -0.9 |
| GTP cyclohydrolase I similar to GTP cyclohydrolase I GB:P22288 [Rattus norvegicus]; contains Pfam profile: PF01227 GTP cyclohydrolase I                    | 258834_at   | -0.9 |
| hypothetical protein predicted by genscan;supported by full-length cDNA: Ceres:100676.                                                                     | 258787_at   | -0.9 |
| putative coatomer zeta subunit (zeta-coat protein) similar to coatomer zeta subunit (zeta-coat protein) GB:P35604 (Bos taurus)                             | 258710_s_at | -0.9 |
| unknown protein                                                                                                                                            | 258662_at   | -0.9 |
| thioredoxin f1 identical to thioredoxin f1 GB:AF144385 [Arabidopsis thaliana];supported by full-length cDNA: Ceres:11767.                                  | 258607_at   | -0.9 |
| putative phosphatidate phosphohydrolase similar to phosphatidate phosphohydrolase GB:AAB50246 from [Rattus norvegicus];supported by full-len;              | 258481_at   | -0.9 |
| unknown protein ;supported by full-length cDNA: Ceres:15303.                                                                                               | 258394_at   | -0.9 |
| putative transport protein similar to transport protein GB:AAB00858 from [Arabidopsis thaliana]                                                            | 258332_at   | -0.9 |
| photosystem I subunit VI precursor identical to GB:CAB52749 from [Arabidopsis thaliana];supported by full-length cDNA: Ceres:9633.                         | 258285_at   | -0.9 |
| beta-glucosidase, putative similar to beta-glucosidase BQ60 precursor GB:A57512 [Hordeum vulgare];supported by full-length cDNA: Ceres:1196                | 258151_at   | -0.9 |
| expansin At-EXP5 identical to expansin At-EXP5 GB:AAB38071 from [Arabidopsis thaliana]; supported by cDNA: gi_1041703_gb_U30478.1_ATU3                     | 258003_at   | -0.9 |
| unknown protein                                                                                                                                            | 257983_at   | -0.9 |
| hypothetical protein similar to hypothetical protein GB:AAD50054 from [Arabidopsis thaliana]                                                               | 257964_at   | -0.9 |
| actin 2 identical to GB:AAB37098 from [Arabidopsis thaliana], Plant J. 10 (1), 107-121 (1996);supported by full-length cDNA: Ceres:3819.                   | 257749_at   | -0.9 |
| histone H3, putative similar to histone H3 GB:P05203 [Petroselinum crispum]; supported by cDNA: gi_14335141_gb_AY037250.1_                                 | 257714_at   | -0.9 |
| 60S ribosomal protein, putative similar to 60S RIBOSOMAL PROTEIN L13A GB:P35427 from [Rattus norvegicus];supported by full-length cDNA: C                  | 257599_at   | -0.9 |
| salicylic acid carboxyl methyltransferase, putative similar to GB:AAF00108 from [Clarkia breweri]                                                          | 257254_at   | -0.9 |
| zinc finger protein, putative contains Pfam profile: PF01760 CONSTANS family zinc finger;supported by full-length cDNA: Ceres:258241.                      | 257262_at   | -0.9 |
| ras-related GTP-binding protein contains Pfam profile: PF00071 ras family                                                                                  | 257235_at   | -0.9 |
| unknown protein ;supported by full-length cDNA: Ceres:20771.; supported by cDNA: gi_10880500_gb_AF195893.1_AF195893                                        | 256964_at   | -0.9 |
| Expressed protein ; supported by full-length cDNA: Ceres: 38257.                                                                                           | 256979_at   | -0.9 |
| hypothetical protein predicted by genemark.hmm, contains Pfam profile:PF00076 rrm:RNA recognition motif                                                    | 256770_at   | -0.9 |
| galactosidase, putative similar to BETA-GALACTOSIDASE PRECURSOR (LACTASE) GB:P48980 from [Lycopersicon esculentum]                                         | 256772_at   | -0.9 |
| hypothetical protein predicted by genemark.hmm                                                                                                             | 256741_at   | -0.9 |
| unknown protein                                                                                                                                            | 256698_at   | -0.9 |
| omega-3 fatty acid desaturase, chloroplast precursor identical to omega-3 fatty acid desaturase, chloroplast precursor SP:P46310 (Arabidopsis tha          | 256417_s_at | -0.9 |
| Expressed protein ; supported by full-length cDNA: Ceres: 11938.                                                                                           | 256092_at   | -0.9 |
| unknown protein ;supported by full-length cDNA: Ceres:28780.                                                                                               | 256062_at   | -0.9 |
| transcription factor, putative similar to transcription factor BTF3 homolog Gl:2982299 from [Picea mariana];supported by full-length cDNA: Ceres:11        | 255902_at   | -0.9 |
| lemir (miraculin), putative similar to lemip (miraculin) Gl:2654440 from [Lycopersicon esculentum]; supported by cDNA: gi_12083239_gb_AF332416             | 255904_at   | -0.9 |
| unknown protein ;supported by full-length cDNA: Ceres:12461.                                                                                               | 255854_at   | -0.9 |
| sulfate adenylyltransferase identical to sulfate adenylyltransferase Gl:487404 from [Arabidopsis thaliana];supported by full-length cDNA: Ceres:213;       | 255785_at   | -0.9 |
| hypothetical protein predicted by genscan+;supported by full-length cDNA: Ceres:232413.                                                                    | 255775_at   | -0.9 |
| myb factor, putative similar to myb factor Gl:1946266 from [Oryza sativa]; supported by cDNA: gi_3941465_gb_AF062887.1_AF062887                            | 255753_at   | -0.9 |
| Expressed protein ; supported by full-length cDNA: Ceres: 28726.                                                                                           | 255554_at   | -0.9 |
| drought-induced-19-like 1 similar to drought-induced-19, GenBank accession number X78584 similar to F2P16.10, GenBank accession number 21                  | 255504_at   | -0.9 |
| putative sugar transporter                                                                                                                                 | 255294_at   | -0.9 |
| coded for by A. thaliana cDNA T44741                                                                                                                       | 255255_at   | -0.9 |
| Expressed protein ; supported by full-length cDNA: Ceres: 1734.                                                                                            | 255104_at   | -0.9 |
| receptor protein kinase-like protein receptor protein kinase-like protein - Arabidopsis thaliana, PIR2:T05898                                              | 255116_at   | -0.9 |
| putative pollen-specific protein pollen-specific protein precursor - common tobacco, PIR2:S22495                                                           | 254815_at   | -0.9 |
| blue copper-binding protein, 15K (lamin) ;supported by full-length cDNA: Ceres:41510.                                                                      | 254789_at   | -0.9 |
| protein ch-42 precursor, chloroplast ;supported by full-length cDNA: Ceres:7501.                                                                           | 254623_at   | -0.9 |
| putative protein several hypothetical proteins - Arabidopsis thaliana; supported by cDNA: gi_15320409_dbj_AB039927.1_AB039927                              | 254563_at   | -0.9 |
| photosystem II oxygen-evolving complex protein 3 - like photosystem II oxygen-evolving complex protein 3, Spinacia oleracea, PIR2:S00008;suppc             | 254398_at   | -0.9 |
| predicted protein                                                                                                                                          | 254303_at   | -0.9 |
| putative protein pectinesterase - Citrus sinensis, PID:g2098705                                                                                            | 254110_at   | -0.9 |
| putative protein other hypothetical proteins Arabidopsis thaliana                                                                                          | 254029_at   | -0.9 |
| putative acidic ribosomal protein acidic ribosomal protein P3a - maize, PIR2:T02037                                                                        | 254030_at   | -0.9 |

|                                                                                                                                                       |             |      |
|-------------------------------------------------------------------------------------------------------------------------------------------------------|-------------|------|
| mitogen activated protein kinase kinase (nMAPKK) ;supported by full-length cDNA: Ceres:31259.                                                         | 253993_at   | -0.9 |
| putative protein stem-specific protein - Nicotiana tabacum,PID:g20037;supported by full-length cDNA: Ceres:35207.                                     | 253874_at   | -0.9 |
| hypothetical protein                                                                                                                                  | 253818_at   | -0.9 |
| H+-transporting ATPase type 2, plasma membrane ; supported by cDNA: gi_14334803_gb_AY035075.1_                                                        | 253609_at   | -0.9 |
| Expressed protein ; supported by cDNA: gi_15028200_gb_AY045923.1_                                                                                     | 253551_at   | -0.9 |
| putative protein ;supported by full-length cDNA: Ceres:8742.                                                                                          | 253272_at   | -0.9 |
| Expressed protein ; supported by full-length cDNA: Ceres: 279.                                                                                        | 253234_at   | -0.9 |
| cysteine protease XCP1 identical to papain-type cysteine endopeptidase XCP1 GI:6708181 from [Arabidopsis thaliana]                                    | 253191_at   | -0.9 |
| cytochrome P450 - like protein cytochrome P450, Glycyrrhiza echinata, AB001379;supported by full-length cDNA: Ceres:253698.                           | 253046_at   | -0.9 |
| putative protein other predicted proteins Arabidopsis thaliana                                                                                        | 253059_s_at | -0.9 |
| putative amino acid transport protein amino acid transport protein - Arabidopsis thaliana, PID:g2576363;supported by full-length cDNA: Ceres:3843     | 253006_at   | -0.9 |
| probable H+-transporting ATPase H+-transporting ATPase (EC 3.6.1.35) 57K chain - Arabidopsis thaliana, PIR2:A31886; supported by cDNA: gi_1           | 252998_at   | -0.9 |
| putative protein predicted proteins, Arabidopsis thaliana;supported by full-length cDNA: Ceres:35002.                                                 | 252879_at   | -0.9 |
| Expressed protein ; supported by cDNA: gi_15292972_gb_AY050920.1_                                                                                     | 252763_at   | -0.9 |
| leucine-rich repeat protein LRP -like leucine-rich repeat protein LRP, tomato, PIR:T07079                                                             | 252703_at   | -0.9 |
| calmodulin 7 ; supported by full-length cDNA: Ceres: 7008.                                                                                            | 252713_at   | -0.9 |
| putative protein predicted proteins, Arabidopsis thaliana                                                                                             | 252533_at   | -0.9 |
| putative protein ;supported by full-length cDNA: Ceres:25829.                                                                                         | 252463_at   | -0.9 |
| putative protein putative hydrolyse - Arabidopsis thaliana, PID:g4191785;supported by full-length cDNA: Ceres:262295.                                 | 252433_at   | -0.9 |
| Expressed protein ; supported by cDNA: gi_14326548_gb_AF385728.1_AF385728                                                                             | 252390_at   | -0.9 |
| Expressed protein ; supported by full-length cDNA: Ceres: 3817.                                                                                       | 252352_at   | -0.9 |
| ADP-RIBOSYLATION FACTOR -like protein ARF3 ADP-RIBOSYLATION FACTOR, Arabidopsis thaliana, SWISSPROT:ARF3_ARATH                                        | 252225_at   | -0.9 |
| putative protein various predicted proteins                                                                                                           | 252178_at   | -0.9 |
| putative protein polyphosphoinositide binding protein Ssh2 - Glycine max, PIR:T05953; supported by cDNA: gi_16930482_gb_AF419595.1_AF419              | 252080_at   | -0.9 |
| transcription factor NF-Y, CCAAT-binding - like protein transcription factor NF-Y, CCAAT-binding, Zea mays, PIR:S22820                                | 251991_at   | -0.9 |
| putative protein In2-1 protein, Zea mays, P49248                                                                                                      | 251820_at   | -0.9 |
| putative protein protein of unknown function - Corydalis sempervirens, EMBL:X63595; supported by cDNA: gi_7684291_dbj_D84226.1_D84226                 | 251739_at   | -0.9 |
| putative protein hypothetical protein At2g41330 - Arabidopsis thaliana, EMBL:AC005662; supported by cDNA: gi_15451041_gb_AY054601.1_                  | 251663_at   | -0.9 |
| putative protein hypothetical protein SPCC320.08 - Schizosaccharomyces pombe, PIR:T41303                                                              | 251516_s_at | -0.9 |
| 60S RIBOSOMAL PROTEIN L38-like protein 60S RIBOSOMAL PROTEIN L38 - Lycopersicon esculentum, EMBL:X69979; supported by cDNA: gi_                       | 251486_at   | -0.9 |
| homeobox-leucine zipper protein HAT3 ; supported by cDNA: gi_527632_gb_U09338.1_ATU09338                                                              | 251374_at   | -0.9 |
| putative protein putative protein At2g46160 - EMBL:AC005397; supported by cDNA: gi_16226238_gb_AF428280.1_AF428280                                    | 251330_at   | -0.9 |
| putative protein several hypothetical proteins;supported by full-length cDNA: Ceres:29280.                                                            | 251285_at   | -0.9 |
| putative protein                                                                                                                                      | 251058_at   | -0.9 |
| Expressed protein ; supported by full-length cDNA: Ceres: 22246.                                                                                      | 250922_at   | -0.9 |
| putative protein contains similarity to unknown protein (gb AAF19573.1);supported by full-length cDNA: Ceres:118003.                                  | 250810_at   | -0.9 |
| short chain alcohol dehydrogenase-like ;supported by full-length cDNA: Ceres:111427.                                                                  | 250763_at   | -0.9 |
| putative protein similar to unknown protein (emb CAB88360.1);supported by full-length cDNA: Ceres:29476.                                              | 250764_at   | -0.9 |
| putative protein similar to unknown protein (gb AAD23015.1)                                                                                           | 250682_x_at | -0.9 |
| unknown protein ; supported by full-length cDNA: Ceres: 17482.                                                                                        | 250668_at   | -0.9 |
| putative protein PTD008, Homo sapiens, EMBL:AF078861;supported by full-length cDNA: Ceres:226.                                                        | 250553_at   | -0.9 |
| putative protein synaptobrevin-like protein Syb1, Mus musculus, EMBL:MMU133536                                                                        | 250412_at   | -0.9 |
| putative protein 23 kDa polypeptide of water-oxidizing complex of photosystem II, Nicotiana tabacum, EMBL:NT23WOP2B                                   | 250371_at   | -0.9 |
| putative protein SF21 protein, Helianthus annuus, EMBL: AF189148; supported by cDNA: gi_13605683_gb_AF361823.1_AF361823                               | 250337_at   | -0.9 |
| NADP dependent malic enzyme - like protein NADP dependent malic enzyme, P.vulgaris, EMBL:PVME1G; supported by cDNA: gi_16226465_gb_                   | 250339_at   | -0.9 |
| transporter-like protein                                                                                                                              | 250248_at   | -0.9 |
| plastid-specific ribosomal protein 6 precursor (Psrp-6) - like plastid-specific ribosomal protein 6 precursor (Psrp-6), Spinacia oleracea, EMBL:AF24f | 250058_at   | -0.9 |
| glutamate dehydrogenase (EC 1.4.1.-) 1 (pir S71217) ; supported by cDNA: gi_15146203_gb_AY049243.1_                                                   | 250032_at   | -0.9 |
| NADH:ubiquinone oxidoreductase - like protein NADH:ubiquinone oxidoreductase PGIV subunit, Homo sapiens, EMBL:AF044953; supported by fu               | 249959_at   | -0.9 |
| ATP-dependent Clp protease proteolytic subunit (ClpP2), putative similar to SP:Q9X6W8 ATP-dependent Clp protease proteolytic subunit (EC 3.4.:        | 249873_at   | -0.9 |
| 40S ribosomal protein S11 ;supported by full-length cDNA: Ceres:33187.                                                                                | 249795_at   | -0.9 |
| unknown protein                                                                                                                                       | 249736_at   | -0.9 |
| Ttg1 protein (emb CAB45372.1)                                                                                                                         | 249739_at   | -0.9 |
| zinc finger - like protein predicted protein, Drosophila melanogaster, EMBL:AE003589                                                                  | 249370_at   | -0.9 |
| putative protein strong similarity to unknown protein (gb AAF04433.1)                                                                                 | 249220_at   | -0.9 |
| putative protein similar to unknown protein (pir T05076);supported by full-length cDNA: Ceres:42747.                                                  | 248870_at   | -0.9 |
| 60S acidic ribosomal protein P1-like protein ;supported by full-length cDNA: Ceres:14401.                                                             | 248768_at   | -0.9 |

|                                                                                                                                                   |             |      |
|---------------------------------------------------------------------------------------------------------------------------------------------------|-------------|------|
| respiratory burst oxidase protein ; supported by cDNA: gi_3242788_gb_AF055357.1_AF055357                                                          | 248719_at   | -0.9 |
| small zinc finger-like protein ;supported by full-length cDNA: Ceres:33833.                                                                       | 248473_at   | -0.9 |
| unknown protein                                                                                                                                   | 248387_at   | -0.9 |
| membrane associated protein ; supported by cDNA: gi_1800146_gb_U83655.1_ATU83655                                                                  | 248195_at   | -0.9 |
| unknown protein ;supported by full-length cDNA: Ceres:19914.                                                                                      | 248172_at   | -0.9 |
| unknown protein                                                                                                                                   | 248079_at   | -0.9 |
| 60S ribosomal protein L31 ;supported by full-length cDNA: Ceres:14992.                                                                            | 247978_at   | -0.9 |
| putative protein similar to unknown protein (pir [T04270]);supported by full-length cDNA: Ceres:110454.                                           | 247980_at   | -0.9 |
| porin-like protein ;supported by full-length cDNA: Ceres:23726.                                                                                   | 247923_at   | -0.9 |
| endoxyloglucan transferase (gb)AAD45127.1) ; supported by cDNA: gi_1244751_gb_U43485.1_ATU43485                                                   | 247866_at   | -0.9 |
| putative protein protein tyrosine phosphatase-like protein, PTPLB, Mus musculus, EMBL:AF169286                                                    | 247689_at   | -0.9 |
| ras-GTPase-activating protein SH3-domain binding protein - like G3BP ras-GTPase-activating protein SH3-domain binding protein, Mus musculus,      | 247551_at   | -0.9 |
| ethylene responsive element binding factor - like ethylene responsive element binding factor 5, Arabidopsis thaliana, SWISSPROT:ERF5_ARATH;       | 247540_at   | -0.9 |
| peptide transporter                                                                                                                               | 247440_at   | -0.9 |
| homeobox-leucine zipper protein ATHB-5 (HD-zip protein ATHB-5) (sp)P46667) ; supported by cDNA: gi_13358240_gb_AF325054.2_AF325054                | 247191_at   | -0.9 |
| auxin-induced protein IAA9 (pir [T05902] );supported by full-length cDNA: Ceres:31563.                                                            | 247148_at   | -0.9 |
| putative protein similar to unknown protein (gb)AAF64534.1);supported by full-length cDNA: Ceres:4831.                                            | 247037_at   | -0.9 |
| putative protein similar to unknown protein (gb)AAC18972.1); supported by cDNA: gi_15293188_gb_AY051028.1_                                        | 246998_at   | -0.9 |
| porin-like protein ;supported by full-length cDNA: Ceres:12964.                                                                                   | 247007_at   | -0.9 |
| putative protein apoptosis-related protein PNAS-4, Homo sapiens, EMBL:AF229834;supported by full-length cDNA: Ceres:263500.                       | 246931_at   | -0.9 |
| putative protein predicted protein, Arabidopsis thaliana                                                                                          | 246885_at   | -0.9 |
| putative cytidine deaminase - like putative cytidine deaminase, Cicer arietinum, EMBL:AJ006764;supported by full-length cDNA: Ceres:37242.        | 246702_at   | -0.9 |
| putative protein EXOSTOSIN-1 (PUTATIVE TUMOR SUPPRESSOR PROTEIN EXT1) - Homo sapiens, EMBL:S79639                                                 | 246682_at   | -0.9 |
| glycine/proline-rich protein glycine/proline-rich protein GPRP - Arabidopsis thaliana, EMBL:X84315                                                | 246440_at   | -0.9 |
| hypothetical protein ;supported by full-length cDNA: Ceres:22757.                                                                                 | 246443_at   | -0.9 |
| integral membrane protein, putative similar to integral membrane protein GI:3288599 from [Rattus norvegicus]; supported by full-length cDNA: Cere | 246378_at   | -0.9 |
| ribosomal protein L36-like ribosomal protein L36 - Synechocystis sp., PIR:S77481;supported by full-length cDNA: Ceres:28109.                      | 246073_at   | -0.9 |
| phospholipase - like protein various predicted phospholipase proteins;supported by full-length cDNA: Ceres:253499.                                | 246041_at   | -0.9 |
| AKIN beta1 ; supported by full-length cDNA: Ceres: 41668.                                                                                         | 246028_at   | -0.9 |
| rec - like protein                                                                                                                                | 245695_at   | -0.9 |
| ribonucleoprotein like protein                                                                                                                    | 245605_at   | -0.9 |
| CCAAT-binding transcription factor subunit A(CBF-A)                                                                                               | 245592_at   | -0.9 |
| disease resistance RPP5 like protein (fragment)                                                                                                   | 245460_at   | -0.9 |
| hypothetical protein ;supported by full-length cDNA: Ceres:16090.                                                                                 | 245394_at   | -0.9 |
| hypothetical protein ; supported by full-length cDNA: Ceres: 12451.                                                                               | 245368_at   | -0.9 |
| Expressed protein ; supported by full-length cDNA: Ceres: 7101.                                                                                   | 245337_at   | -0.9 |
| putative mitochondrial carrier protein similar to SP:P40556:YIA6_YEAST and SP:P39953:YEA6_YEAST;supported by full-length cDNA: Ceres:1203         | 245152_at   | -0.9 |
| ATPase III subunit                                                                                                                                | 245026_at   | -0.9 |
| auxin induced protein, putative similar to AUXIN-INDUCED PROTEIN X10A GB:P33080 from [Glycine max]                                                | 257460_at   | -0.9 |
| amylogenin; reversibly glycosylatable polypeptide ;supported by full-length cDNA: Ceres:7365.                                                     | 250130_at   | -0.9 |
| photoreceptor-interacting protein-like ; supported by cDNA: gi_15146317_gb_AY049300.1_                                                            | 247048_at   | -0.9 |
| putative glucanase                                                                                                                                | 267595_at   | -0.8 |
| unknown protein                                                                                                                                   | 267517_at   | -0.8 |
| unknown protein                                                                                                                                   | 267348_at   | -0.8 |
| hypothetical protein predicted by genscan and genefinder;supported by full-length cDNA: Ceres:20125.                                              | 267294_at   | -0.8 |
| putative serine carboxypeptidase I ; supported by cDNA: gi_14334757_gb_AY035052.1_                                                                | 267262_at   | -0.8 |
| unknown protein                                                                                                                                   | 267233_s_at | -0.8 |
| unknown protein ;supported by full-length cDNA: Ceres:6950.                                                                                       | 267238_at   | -0.8 |
| 60S ribosomal protein L7 ;supported by full-length cDNA: Ceres:36813.                                                                             | 267213_at   | -0.8 |
| putative cellulose synthase                                                                                                                       | 267115_s_at | -0.8 |
| hypothetical protein predicted by genefinder                                                                                                      | 266899_at   | -0.8 |
| unknown protein predicted by genscan and genefinder; supported by cDNA: gi_15983421_gb_AF424585.1_AF424585                                        | 266703_at   | -0.8 |
| unknown protein ; supported by cDNA: gi_15450758_gb_AY053421.1_                                                                                   | 266553_at   | -0.8 |
| glycine decarboxylase complex H-protein ; supported by cDNA: gi_15810183_gb_AY056106.1_                                                           | 266517_at   | -0.8 |
| unknown protein                                                                                                                                   | 266473_at   | -0.8 |
| calmodulin-like protein identical to GB:X68054;supported by full-length cDNA: Ceres:11537.                                                        | 266371_at   | -0.8 |
| tubulin beta-7 chain identical to GB:M84704;supported by full-length cDNA: Ceres:17240.                                                           | 266295_at   | -0.8 |

|                                                                                                                                                       |             |      |
|-------------------------------------------------------------------------------------------------------------------------------------------------------|-------------|------|
| putative glutathione S-transferase ;supported by full-length cDNA: Ceres:24361.                                                                       | 266296_at   | -0.8 |
| 60S ribosomal protein L10A ; supported by cDNA: gi_13430467_gb_AF360146.1_AF360146                                                                    | 266210_at   | -0.8 |
| putative SCARECROW gene regulator                                                                                                                     | 266131_at   | -0.8 |
| putative transport protein SEC61 beta-subunit ; supported by cDNA: gi_13878102_gb_AF370314.1_AF370314                                                 | 266105_at   | -0.8 |
| putative RING zinc finger protein ; supported by full-length cDNA: Ceres:92525.                                                                       | 266016_at   | -0.8 |
| putative adenylate kinase ;supported by full-length cDNA: Ceres:15831.                                                                                | 265958_at   | -0.8 |
| putative histone H2B ;supported by full-length cDNA: Ceres:31973.                                                                                     | 265960_at   | -0.8 |
| unknown protein ;supported by full-length cDNA: Ceres:38690.                                                                                          | 265771_at   | -0.8 |
| hypothetical protein predicted by genefinder                                                                                                          | 265776_at   | -0.8 |
| unknown protein ; supported by full-length cDNA: Ceres: 14111.                                                                                        | 265281_at   | -0.8 |
| unknown protein                                                                                                                                       | 265203_at   | -0.8 |
| 1-aminocyclopropane-1-carboxylate oxidase Identical to 1-aminocyclopropane-1-carboxylate oxidase (ACC oxidase) gb X66719 (EAT1). ESTs gb              | 265194_at   | -0.8 |
| unknown protein                                                                                                                                       | 265148_at   | -0.8 |
| hypothetical protein contains similarity to 2-ketocyclohexanecarboxyl-CoA hydrolase GI:3243084 from [Rhodospseudomonas palustris]                     | 264920_at   | -0.8 |
| oligopeptide transporter, putative similar to oligopeptide transporter 1-1 GI:510238 from [Arabidopsis thaliana]                                      | 264736_at   | -0.8 |
| putative pectate lyase A11 similar to GB:CAB36835;supported by full-length cDNA: Ceres:37952.                                                         | 264611_at   | -0.8 |
| unknown protein                                                                                                                                       | 264616_at   | -0.8 |
| putative prolyl 4-hydroxylase, alpha subunit ;supported by full-length cDNA: Ceres:36054.                                                             | 264592_at   | -0.8 |
| unknown protein similar to hypothetical protein GI:4079632 from [Arabidopsis thaliana]                                                                | 264424_at   | -0.8 |
| polygalacturonase isoenzyme 1 beta subunit, putative similar to polygalacturonase isoenzyme 1 beta subunit GI:1762585 from [Lycopersicon escul        | 264277_at   | -0.8 |
| putative signal sequence receptor, alpha subunit (SSR-alpha) Same as GP: 1174448;supported by full-length cDNA: Ceres:27787.                          | 264020_at   | -0.8 |
| unknown protein ;supported by full-length cDNA: Ceres:15743.                                                                                          | 263985_at   | -0.8 |
| unknown protein                                                                                                                                       | 263942_at   | -0.8 |
| unknown protein                                                                                                                                       | 263914_at   | -0.8 |
| putative cyclic nucleotide-regulated ion channel protein                                                                                              | 263776_s_at | -0.8 |
| putative tyrosine aminotransferase ; supported by cDNA: gi_15293106_gb_AY050987.1_                                                                    | 263714_at   | -0.8 |
| putative protein kinase C inhibitor (Zinc-binding protein) Similar to gb Z29643 protein kinase C inhibitor (PKCI) from Zea mays and a member of HIT   | 263701_at   | -0.8 |
| unknown protein ; supported by full-length cDNA: Ceres:14886.                                                                                         | 263710_at   | -0.8 |
| putative RNA-binding protein Identical to gb Y10557_g5bf gene from Arabidopsis thaliana. ESTs gb R30578, gb R90475, gb T22384, gb T22425, gt          | 263676_at   | -0.8 |
| ankyrin-like protein EST gb ATTS0956 comes from this gene;supported by full-length cDNA: Ceres:108617.                                                | 263662_at   | -0.8 |
| putative receptor-like protein kinase ; supported by cDNA: gi_16648754_gb_AY058153.1_                                                                 | 263478_at   | -0.8 |
| putative beta-hydroxyacyl-ACP dehydratase ; supported by full-length cDNA: Ceres: 30185.                                                              | 263432_at   | -0.8 |
| unknown protein ; supported by full-length cDNA: Ceres: 11283.                                                                                        | 263399_at   | -0.8 |
| putative photosystem I reaction center subunit II precursor Strong similarity to gb X14017 from Spinacia oleracea. ESTs gb R30423, gb T42998, gb      | 263114_at   | -0.8 |
| hypothetical protein predicted by genemark.hmm;supported by full-length cDNA: Ceres:5677.                                                             | 263133_at   | -0.8 |
| putative obtusifoliol 14-alpha demethylase strong similarity to gb U74319 obtusifoliol 14-alpha demethylase (CYP51) from Sorghum bicolor and is a     | 262820_at   | -0.8 |
| thioredoxin, putative similar to thioredoxin GI:142153 from [Synechococcus PCC6301]                                                                   | 262721_at   | -0.8 |
| calmodulin, putative similar to calmodulin-6 SP:Q03509 [Arabidopsis thaliana (Mouse-ear cross)]                                                       | 262639_at   | -0.8 |
| unknown protein Strong similarity to gb AF096285 serine-threonine kinase receptor-associated protein from Mus musculus and contains 5 PF 0040         | 262597_at   | -0.8 |
| hypothetical protein predicted by genscan+                                                                                                            | 262490_at   | -0.8 |
| putative 20S proteasome beta subunit PBC2 almost identical to GB:AAC32069 from [Arabidopsis thaliana], EST gb T76747 comes from this gene;:           | 262497_at   | -0.8 |
| thioredoxin, putative similar to thioredoxin x GB:AAF15952 GI:6539616 from [Arabidopsis thaliana];supported by full-length cDNA: Ceres:22429.         | 262418_at   | -0.8 |
| unknown protein ; supported by cDNA: gi_12642919_gb_AF339720.1_AF339720                                                                               | 262402_at   | -0.8 |
| protein phosphatase type 2C, putative similar to GB:AAD17805 from (Lotus japonicus) (Proc. Natl. Acad. Sci. U.S.A. 96 (4), 1738-1743 (1999))          | 262408_at   | -0.8 |
| hypothetical protein predicted by genemark.hmm;supported by full-length cDNA: Ceres:24864.                                                            | 262170_at   | -0.8 |
| putative GDP-mannose pyrophosphorylase similar to GDP-mannose pyrophosphorylase A GB:AAD38517 (Homo sapiens); supported by cDNA: gi_                  | 262174_at   | -0.8 |
| GTP-binding protein, putative similar to GTP-binding protein NGB GB:AAD09830 GI:4191616 from [Homo sapiens]                                           | 261882_at   | -0.8 |
| transcription factor, putative similar to WRKY transcription factor GB:BAA87058 GI:6472585 from [Nicotiana tabacum];supported by full-length cDN      | 261892_at   | -0.8 |
| hypothetical protein contains similarity to AP2 DNA-binding domain protein GI:1732030 from [Zea mays]; supported by cDNA: gi_15028184_gb_AY           | 261794_at   | -0.8 |
| unknown protein ; supported by cDNA: gi_15450426_gb_AY052314.1_                                                                                       | 261721_at   | -0.8 |
| acyl-(acyl carrier protein) thioesterase, putative almost identical to acyl-(acyl carrier protein) thioesterase GB:CAA85387 GI:634003 from [Arabidop: | 261722_at   | -0.8 |
| unknown protein similar to hypothetical protein GB:AAF22901 GI:6664319 from [Arabidopsis thaliana]; supported by cDNA: gi_16930480_gb_AF41            | 261696_at   | -0.8 |
| hypothetical protein similar to hypothetical protein GB:AAF25986 GI:6714290 from [Arabidopsis thaliana];supported by full-length cDNA: Ceres:126      | 261671_at   | -0.8 |
| hypothetical protein predicted by genemark.hmm                                                                                                        | 261597_at   | -0.8 |
| unknown protein contains similarity to extensin-like protein GB:CAA19879 GI:3297821 from [Arabidopsis thaliana]                                       | 261598_at   | -0.8 |
| unknown protein ;supported by full-length cDNA: Ceres:3365.                                                                                           | 261561_at   | -0.8 |
| globulin-like protein similar to GB:7595348 from [Cucumis melo];supported by full-length cDNA: Ceres:40551.                                           | 261415_at   | -0.8 |

|                                                                                                                                                        |             |      |
|--------------------------------------------------------------------------------------------------------------------------------------------------------|-------------|------|
| hypothetical protein predicted by genemark.hmm; supported by cDNA: gi_13878106_gb_AF370316.1_AF370316                                                  | 261338_at   | -0.8 |
| 1-aminocyclopropane-1-carboxylate synthase, putative similar to GB:U35779 from [Triticum aestivum] (Plant Mol. Biol. 31 (5), 1009-1020 (1996));        | 261108_at   | -0.8 |
| unknown protein ; supported by full-length cDNA: Ceres:32887.                                                                                          | 261032_at   | -0.8 |
| chloroplast thylakoidal processing peptidase, putative similar to chloroplast thylakoidal processing peptidase GB:CAA71502 GI:2769566 from [Ara:       | 260829_s_at | -0.8 |
| ethylene response factor, putative similar to ethylene response factor 1 GB:AAD03544 GI:4128208 from [Arabidopsis thaliana]                            | 260783_at   | -0.8 |
| putative trypsin inhibitor ; supported by full-length cDNA: Ceres:15927.                                                                               | 260546_at   | -0.8 |
| putative histidinol-phosphate aminotransferase similar to histidinol-phosphate aminotransferase GB:CAA70403 from [Nicotiana tabacum]                   | 260172_s_at | -0.8 |
| Expressed protein ; supported by cDNA: gi_16648699_gb_AY058126.1_                                                                                      | 260046_at   | -0.8 |
| putative UDP-N-acetylglucosamine--N-acetylmuramyl-(pentapeptide)-pyrophosphoryl-undecaprenol N-acetylglucosamine transferase similar to put            | 260047_at   | -0.8 |
| putative 30S ribosomal protein S13 similar to putative 30S ribosomal protein S13, chloroplast precursor GB:P42732 [Arabidopsis thaliana]               | 259678_at   | -0.8 |
| inorganic pyrophosphatase, putative similar to inorganic pyrophosphatase GI:790478 from [Nicotiana tabacum]; supported by cDNA: gi_166633_gt           | 259504_at   | -0.8 |
| allene oxide cyclase, putative similar to allene oxide cyclase GI:8977961 from [Lycopersicon esculentum]; supported by cDNA: gi_16323064_gb_A          | 259366_at   | -0.8 |
| putative small nuclear ribonucleoprotein polypeptide G similar to small nuclear ribonucleoprotein polypeptide G GB:4507133 [Homo sapiens]              | 259288_at   | -0.8 |
| putative 40S ribosomal protein s14 similar to 40S ribosomal protein S14 GB:P19950 [Zea mays]; supported by full-length cDNA: Ceres: 7969.              | 259239_at   | -0.8 |
| putative actin similar to actin 1 GB:P02578 [Acanthamoeba castellanii]; supported by full-length cDNA: Ceres:103956.                                   | 259242_at   | -0.8 |
| carbonic anhydrase, chloroplast precursor identical to carbonic anhydrase, chloroplast precursor GB:P27140 [Arabidopsis thaliana]; supported by c      | 259161_at   | -0.8 |
| vacuolar membrane ATPase subunit G (AVMA10) identical to vacuolar membrane ATPase subunit G (AVMA10) GB:AF181688 [Arabidopsis thalian                  | 258958_at   | -0.8 |
| putative ribosomal protein S28 similar to ribosomal protein S28 GB:P34789 [Arabidopsis thaliana]                                                       | 258937_at   | -0.8 |
| glutathione S-transferase identical to glutathione S-transferase GB:AAB09584 from [Arabidopsis thaliana]; supported by cDNA: gi_1575751_gb_U7          | 258851_at   | -0.8 |
| putative aspartyl protease contains Pfam profile: PF00026 Eukaryotic aspartyl protease; supported by full-length cDNA: Ceres:40409.                    | 258615_at   | -0.8 |
| unknown protein contains Pfam profile: PF00106 short chain dehydrogenase                                                                               | 258467_at   | -0.8 |
| hypothetical protein contains similarity to putative phosphate/phosphoenolpyruvate translocator protein GB:AAD20711 from [Arabidopsis thaliana];       | 258371_at   | -0.8 |
| unknown protein                                                                                                                                        | 258318_at   | -0.8 |
| hypothetical protein similar to hypothetical protein GB:AAF01546 from [Arabidopsis thaliana]                                                           | 257999_at   | -0.8 |
| unknown protein ; supported by cDNA: gi_15010765_gb_AY045684.1_                                                                                        | 257894_at   | -0.8 |
| disease resistance protein, putative similar to Hcr2-5b GB:AAC78595 [Lycopersicon esculentum] (Plant Cell 10, 1915-1926 (1998)); contains Pfam         | 257763_s_at | -0.8 |
| unknown protein similar to TCP3 GB:AAC24010 [Arabidopsis thaliana]                                                                                     | 257267_at   | -0.8 |
| ER lumen retaining receptor (HDEL receptor), putative similar to GB:P35402 from [Arabidopsis thaliana]; supported by full-length cDNA: Ceres:233       | 257104_at   | -0.8 |
| GATA transcription factor 1 (AtGATA-1) identical to GATA transcription factor 1 (AtGATA-1) GB:Y13648 [Arabidopsis thaliana]; supported by full-len     | 256916_at   | -0.8 |
| unknown protein contains Pfam profile: PF00153 mitochondrial carrier proteins; supported by full-length cDNA: Ceres:39353.                             | 256819_at   | -0.8 |
| dirigent protein, putative similar to dirigent protein GB:AAF25365 from [Thuja plicata]                                                                | 256781_at   | -0.8 |
| Expressed protein ; supported by full-length cDNA: Ceres: 22461.                                                                                       | 256743_at   | -0.8 |
| serine/arginine-rich protein, putative similar to serine/arginine-rich protein GB:AAF17288 GI:6572475 from [Arabidopsis thaliana]; supported by cDN    | 256649_at   | -0.8 |
| actin 11 (ACT11) identical to actin 11 (ACT11) SP:P53496 (Plant J. 10:189-202(1996)); supported by full-length cDNA: Ceres:38101.                      | 256275_at   | -0.8 |
| guanine nucleotide regulatory protein, putative similar to guanine nucleotide regulatory protein GI:452360 from [Vicia faba]; supported by full-length | 256112_at   | -0.8 |
| Expressed protein ; supported by full-length cDNA: Ceres: 250775.                                                                                      | 256064_at   | -0.8 |
| hypothetical protein predicted by genefinder and genscan; supported by full-length cDNA: Ceres:15024.                                                  | 255824_at   | -0.8 |
| unknown protein ; supported by cDNA: gi_15293076_gb_AY050972.1_                                                                                        | 255827_at   | -0.8 |
| putative serine carboxypeptidase II                                                                                                                    | 255842_at   | -0.8 |
| unknown protein ; supported by full-length cDNA: Ceres:19302.                                                                                          | 255816_at   | -0.8 |
| hypothetical protein similar to putative two-component response regulator protein GI:6623883 from [Arabidopsis thaliana]; supported by full-length c   | 255734_at   | -0.8 |
| probable cytochrome P450                                                                                                                               | 255690_at   | -0.8 |
| stress-induced protein OZ11 precursor ; supported by cDNA: gi_790582_gb_U20347.1_ATU20347                                                              | 255629_at   | -0.8 |
| predicted protein of unknown function ; supported by full-length cDNA: Ceres: 8114.                                                                    | 255440_at   | -0.8 |
| putative protein ADRENODOXIN PRECURSOR (adx1), Rickettsia prowazekii, gb:CAA14664; supported by full-length cDNA: Ceres:17223.                         | 255233_at   | -0.8 |
| hypothetical protein ; supported by full-length cDNA: Ceres: 94438.                                                                                    | 255130_at   | -0.8 |
| putative protein various kinesin light chains; supported by full-length cDNA: Ceres:2538.                                                              | 254951_at   | -0.8 |
| nucleoside diphosphate kinase 3 (ndpk3) ; supported by cDNA: gi_14334559_gb_AY035184.1_                                                                | 254958_at   | -0.8 |
| putative protein hypothetical protein - Brassica napus.PIR2:S42651                                                                                     | 254928_at   | -0.8 |
| oleoyl-[acyl-carrier-protein] hydrolase-like protein oleoyl-[acyl-carrier-protein] hydrolase - Brassica napus, PIR2:S40407                             | 254798_at   | -0.8 |
| pherophorin - like protein pherophorin-S, Volvox carteri, PIR:T10798                                                                                   | 254649_at   | -0.8 |
| putative protein ; supported by cDNA: gi_15292760_gb_AY050814.1_                                                                                       | 254561_at   | -0.8 |
| putative protein hypothetical protein Arabidopsis thaliana; supported by full-length cDNA: Ceres:18947.                                                | 254491_at   | -0.8 |
| Expressed protein ; supported by full-length cDNA: Ceres: 23587.                                                                                       | 254429_at   | -0.8 |
| PRH26 protein ; supported by full-length cDNA: Ceres:36866.                                                                                            | 254343_at   | -0.8 |
| magnesium-protoporphyrin IX methyltransferase - like protein magnesium-protoporphyrin IX methyltransferase, Synechocystis sp, PIR2:S71781; s           | 254105_at   | -0.8 |
| putative DNA binding protein DNA binding protein ACBF - Nicotiana tabacum, PID:g1899188; supported by cDNA: gi_15450813_gb_AY054487.1_                 | 253955_at   | -0.8 |

|                                                                                                                                              |             |      |
|----------------------------------------------------------------------------------------------------------------------------------------------|-------------|------|
| putative protein ; supported by cDNA: gi_15810138_gb_AY056134.1                                                                              | 253922_at   | -0.8 |
| tryptophan synthase beta-subunit (TSB2) ;supported by full-length cDNA: Ceres:104687.                                                        | 253898_s_at | -0.8 |
| Expressed protein ; supported by full-length cDNA: Ceres: 42507.                                                                             | 253830_at   | -0.8 |
| stress responsive protein homolog low temperature and salt responsive protein LT16A - Arabidopsis thaliana,PID:g4039153                      | 253581_at   | -0.8 |
| putative protein hypothetical protein F9F13.130 - Arabidopsis thaliana,PIR2:T10590;supported by full-length cDNA: Ceres:21252.               | 253593_at   | -0.8 |
| ribosomal protein S6 - like ribosomal protein S6, Arabidopsis thaliana, PID:g2662469; supported by cDNA: gi_15292738_gb_AY050803.1_          | 253487_at   | -0.8 |
| Expressed protein ; supported by full-length cDNA: Ceres: 109432.                                                                            | 253302_at   | -0.8 |
| male sterility 2-like protein male sterility protein 2, Brassica napus, gb:X99922; supported by cDNA: gi_16323106_gb_AY057657.1_             | 253309_at   | -0.8 |
| putative protein ; supported by cDNA: gi_14517511_gb_AY039591.1_                                                                             | 253049_at   | -0.8 |
| putative protein cyclin delta-1, Arabidopsis thaliana, SWISS-PROT:P42751                                                                     | 253055_at   | -0.8 |
| putative protein cyclin II - bovine, PIR2:I46014                                                                                             | 252952_at   | -0.8 |
| putative protein tubulin-folding cofactor C, Homo sapiens, U61234                                                                            | 252868_at   | -0.8 |
| putative protein ;supported by full-length cDNA: Ceres:20457.                                                                                | 252850_at   | -0.8 |
| putative protein                                                                                                                             | 252676_at   | -0.8 |
| putative protein                                                                                                                             | 252659_at   | -0.8 |
| acidic ribosomal protein P2 -like acidic ribosomal protein P2, maize, PIR:S54179                                                             | 252643_at   | -0.8 |
| cytoplasmic ribosomal protein S15a -like cytoplasmic ribosomal protein S15a, Arabidopsis thaliana, EMBL:ATAF1412                             | 252566_at   | -0.8 |
| putative protein DCL PROTEIN, CHLOROPLAST PRECURSOR (DEFECTIVE CHLOROPLASTS AND LEAVES PROTEIN) - Lycopersicon esculentum                    | 252481_at   | -0.8 |
| Expressed protein ; supported by full-length cDNA: Ceres: 122249.                                                                            | 252389_at   | -0.8 |
| cytosolic ribosomal protein S11 ;supported by full-length cDNA: Ceres:40559.                                                                 | 252297_at   | -0.8 |
| 6-phosphogluconolactonase - like protein 6-phosphogluconolactonase (6PGL ), Homo sapiens, EMBL:HSA243972;supported by full-length cDNA:      | 252282_at   | -0.8 |
| calmodulin-like protein flagellar calmodulin - Naegleria gruberi, PID:g458232; supported by cDNA: gi_166647_gb_L12115.1_ATHCALLGA            | 252136_at   | -0.8 |
| hypothetical protein ; supported by cDNA: gi_15450654_gb_AY052695.1_                                                                         | 252010_at   | -0.8 |
| pectate lyase -like protein pectate lyase, Musa acuminata, EMBL:MAPEL;supported by full-length cDNA: Ceres:119092.                           | 251982_at   | -0.8 |
| hypothetical protein ER6 protein - Lycopersicon esculentum, EMBL:AF096262; supported by full-length cDNA: Ceres: 269951.                     | 251927_at   | -0.8 |
| phosphoribosylformylglycinamide cyclo-ligase precursor ; supported by cDNA: gi_16974614_gb_AY060585.1_                                       | 251830_at   | -0.8 |
| putative protein predicted pectate-lyase, Arabidopsis thaliana, PIR:T06728                                                                   | 251810_at   | -0.8 |
| ABC transporter - like protein breast cancer resistance protein 1 BCRP1, Mus musculus, EMBL:NP_036050; supported by cDNA: gi_15028218_gb     | 251785_at   | -0.8 |
| putative protein ferritin 2 precursor - Vigna unguiculata, PIR:T08124;supported by full-length cDNA: Ceres:33282.                            | 251735_at   | -0.8 |
| 40S ribosomal protein S26 homolog several 40S ribosomal protein S26; supported by cDNA: gi_14532523_gb_AY039886.1_                           | 251737_at   | -0.8 |
| putative protein hypothetical protein T24P15.10 - Arabidopsis thaliana, PIR:T00928                                                           | 251610_at   | -0.8 |
| E2 ubiquitin-conjugating-like enzyme Ahus5 ; supported by cDNA: gi_14596100_gb_AY042838.1_                                                   | 251561_at   | -0.8 |
| ribosomal protein L11 -like ribosomal protein L11, cytosolic, Arabidopsis thaliana, PIR:S49033;supported by full-length cDNA: Ceres:14042.   | 251552_at   | -0.8 |
| putative protein COP1-interacting protein CIP8 - Arabidopsis thaliana, EMBL:AF162150                                                         | 251454_at   | -0.8 |
| putative protein embryonic abundant protein EMB34 - Picea glauca, EMBL:L47672                                                                | 251360_at   | -0.8 |
| delta-8 sphingolipid desaturase ;supported by full-length cDNA: Ceres:34427.                                                                 | 251323_at   | -0.8 |
| putative protein hypothetical proteins - Arabidopsis thaliana                                                                                | 251241_s_at | -0.8 |
| mRNA binding protein precursor - like mRNA binding protein precursor (chloroplast protein), Lycopersicon esculentum, EMBL:AF106660; supporte | 251157_at   | -0.8 |
| putative protein HSPC172, Homo sapiens, EMBL:AF161520;supported by full-length cDNA: Ceres:9788.                                             | 250993_at   | -0.8 |
| putative protein ;supported by full-length cDNA: Ceres:13812.                                                                                | 250844_at   | -0.8 |
| putative protein similar to unknown protein (pir T12959);supported by full-length cDNA: Ceres:252000.                                        | 250707_at   | -0.8 |
| putative protein similar to unknown protein (sp P73920)                                                                                      | 250727_at   | -0.8 |
| copine-like protein copine VII protein - Homo sapiens, EMBL:AJ133798; supported by cDNA: gi_14488103_gb_AF389301.1_AF389301                  | 250581_at   | -0.8 |
| inorganic pyrophosphatase - like protein cytosolic inorganic pyrophosphatase, Homo sapiens, EMBL:AF108211;supported by full-length cDNA: Cer | 250496_at   | -0.8 |
| putative protein ;supported by full-length cDNA: Ceres:12170.                                                                                | 250189_at   | -0.8 |
| isopentenyl pyrophosphate:dimethylallyl pyrophosphate isomerase                                                                              | 250117_at   | -0.8 |
| apyrase (gb AAF00612.1) ; supported by cDNA: gi_6006800_gb_AF156783.1_AF156783                                                               | 250034_at   | -0.8 |
| putative protein predicted proteins, Arabidopsis thaliana                                                                                    | 249982_at   | -0.8 |
| putative protein predicted proteins, Arabidopsis thaliana;supported by full-length cDNA: Ceres:32414.                                        | 249987_at   | -0.8 |
| 60S ribosomal protein L10A ; supported by cDNA: gi_14335147_gb_AY037253.1_                                                                   | 249945_at   | -0.8 |
| cytochrome c1 precursor ; supported by cDNA: gi_15215623_gb_AY050340.1_                                                                      | 249324_at   | -0.8 |
| putative protein similar to unknown protein (emb CAB62355.1);supported by full-length cDNA: Ceres:94968.                                     | 249330_at   | -0.8 |
| unknown protein ;supported by full-length cDNA: Ceres:16944.                                                                                 | 249120_at   | -0.8 |
| putative protein similar to unknown protein (gb AAD10670.1)                                                                                  | 249072_at   | -0.8 |
| putative protein strong similarity to unknown protein (pir T04426)                                                                           | 248945_at   | -0.8 |
| indole-3-glycerol phosphate synthase ; supported by cDNA: gi_15215597_gb_AY050327.1_                                                         | 248688_at   | -0.8 |
| cytochrome b5 (dbj BAA74840.1) ; supported by full-length cDNA: Ceres: 27167.                                                                | 248682_at   | -0.8 |

|                                                                                                                                               |             |      |
|-----------------------------------------------------------------------------------------------------------------------------------------------|-------------|------|
| unknown protein ; supported by cDNA: gi_13605737_gb_AF361850.1_AF361850                                                                       | 248588_at   | -0.8 |
| receptor protein kinase-like                                                                                                                  | 248568_at   | -0.8 |
| putative protein strong similarity to unknown protein (pir T02324); supported by cDNA: gi_15028278_gb_AY046054.1_                             | 248335_at   | -0.8 |
| putative protein similar to unknown protein (pir S77140); supported by full-length cDNA: Ceres: 14354.                                        | 248285_at   | -0.8 |
| putative protein similar to unknown protein (pir T02893)                                                                                      | 248302_at   | -0.8 |
| thylakoid lumenal 17.4 kD protein, chloroplast precursor (P17.4) (sp P81760) ; supported by cDNA: gi_13899114_gb_AF370552.1_AF370552          | 248224_at   | -0.8 |
| unknown protein ; supported by cDNA: gi_16323225_gb_AY057717.1_                                                                               | 248098_at   | -0.8 |
| 40S ribosomal protein S30 homolog (emb CAB79697.1)                                                                                            | 247968_at   | -0.8 |
| unknown protein ; supported by cDNA: gi_16226274_gb_AF428289.1_AF428289                                                                       | 247903_at   | -0.8 |
| ATGP1 ; supported by cDNA: gi_13358229_gb_AF325040.2_AF325040                                                                                 | 247852_at   | -0.8 |
| I-box binding factor - like protein I-box binding factor, Lycopersicon esculentum, EMBL:LES243339                                             | 247768_at   | -0.8 |
| putative protein leucine zipper-containing protein, Lycopersicon esculentum, PIR:S21495; supported by cDNA: gi_14334437_gb_AY034910.1_        | 247693_at   | -0.8 |
| putative protein predicted proteins from various species                                                                                      | 247636_at   | -0.8 |
| RNA helicase                                                                                                                                  | 247606_at   | -0.8 |
| tubulin beta-2/beta-3 chain (sp P29512) ;supported by full-length cDNA: Ceres:39002.                                                          | 247442_s_at | -0.8 |
| amino acid transporter AAP4 (pir S51169) ;supported by full-length cDNA: Ceres:116681.                                                        | 247304_at   | -0.8 |
| unknown protein ;supported by full-length cDNA: Ceres:10032.                                                                                  | 247328_at   | -0.8 |
| unknown protein ; supported by full-length cDNA: Ceres: 25655.                                                                                | 247213_at   | -0.8 |
| 50S ribosomal protein L29 ; supported by full-length cDNA: Ceres: 16740.                                                                      | 247201_at   | -0.8 |
| putative protein strong similarity to unknown protein (pir T10240)                                                                            | 247132_at   | -0.8 |
| putative protein contains similarity to pathogenesis-related protein;supported by full-length cDNA: Ceres:2152.                               | 247074_at   | -0.8 |
| unknown protein                                                                                                                               | 246989_at   | -0.8 |
| putative protein hypothetical protein Sb07 - Picea mariana, EMBL:AF051204                                                                     | 246936_at   | -0.8 |
| 40S ribosomal protein S19 - like 40S ribosomal protein S19, Cyanophora paradoxa, EMBL:CPA245654;supported by full-length cDNA: Ceres:2717     | 246730_at   | -0.8 |
| adenylate kinase -like protein adenylylase kinase (EC 2.7.4.3), chloroplast, maize, PIR:S45634                                                | 246651_at   | -0.8 |
| acetyl-CoA carboxylase ;supported by full-length cDNA: Ceres:20286.                                                                           | 246613_at   | -0.8 |
| hypothetical protein predicted by genemark.hmm                                                                                                | 246410_at   | -0.8 |
| chlorophyll synthetase ; supported by cDNA: gi_14596066_gb_AY042821.1_                                                                        | 246308_at   | -0.8 |
| RUB1-conjugating enzyme RCE1, putative similar to gi:6635457; supported by cDNA: gi_6635456_gb_AF202771.1_AF202771                            | 246218_at   | -0.8 |
| peptidyl-prolyl cis-trans isomerase - like protein peptidyl-prolyl cis-trans isomerase A.thaliana;supported by full-length cDNA: Ceres:25533. | 246040_at   | -0.8 |
| IAA7 like protein                                                                                                                             | 245593_at   | -0.8 |
| hypothetical protein ;supported by full-length cDNA: Ceres:30327.                                                                             | 245396_at   | -0.8 |
| Expressed protein ; supported by full-length cDNA: Ceres: 34967.                                                                              | 245326_at   | -0.8 |
| selenium-binding protein like ; supported by cDNA: gi_14532843_gb_AY040046.1_                                                                 | 245285_s_at | -0.8 |
| GDP-mannose pyrophosphorylase updated per Conklin PL et al, PNAS 1999, 96(7):4198-203;supported by full-length cDNA: Ceres:37775.             | 245060_at   | -0.8 |
| unknown protein                                                                                                                               | 257407_at   | -0.8 |
| unknown protein                                                                                                                               | 267621_at   | -0.8 |
| unknown protein                                                                                                                               | 256771_at   | -0.8 |
| putative protein various predicted proteins, Arabidopsis thaliana;supported by full-length cDNA: Ceres:111923.                                | 250300_at   | -0.8 |
| NADPH:protochlorophyllide oxidoreductase A (gb AAC49043.1) ; supported by cDNA: gi_968974_gb_U29699.1_ATU29699                                | 248197_at   | -0.8 |
| hypothetical protein predicted by genscan;contains protein kinase domain                                                                      | 264378_at   | -0.8 |
| putative phosphoserine aminotransferase                                                                                                       | 263047_at   | -0.8 |
| unknown protein ; supported by cDNA: gi_16648938_gb_AY059839.1_                                                                               | 261320_at   | -0.8 |
| unknown protein                                                                                                                               | 256913_at   | -0.8 |
| phloem serpin-1, putative similar to phloem serpin-1 GI:9937311 from [Cucurbita maxima]                                                       | 264733_at   | -0.8 |
| rhodanese-like family protein ;supported by full-length cDNA: Ceres:1382.                                                                     | 267635_at   | -0.7 |
| unknown protein ; supported by full-length cDNA: Ceres: 28982.                                                                                | 267638_at   | -0.7 |
| unknown protein similar to GP 2245012 gn PID e327000 Z97341; supported by cDNA: gi_15293230_gb_AY051049.1_                                    | 267592_at   | -0.7 |
| putative ribosomal protein S27 ;supported by full-length cDNA: Ceres:18662.                                                                   | 267507_at   | -0.7 |
| putative integral membrane protein                                                                                                            | 267520_at   | -0.7 |
| histone H1 ;supported by full-length cDNA: Ceres:1820.                                                                                        | 267492_at   | -0.7 |
| fatty acid hydroxylase (FAH1) identical to GB:AF021804; supported by cDNA: gi_15215595_gb_AY050326.1_                                         | 267318_at   | -0.7 |
| putative transport protein ;supported by full-length cDNA: Ceres:26825.                                                                       | 267219_at   | -0.7 |
| unknown protein                                                                                                                               | 267235_at   | -0.7 |
| putative adenosine phosphosulfate kinase identical to GB:U05238;supported by full-length cDNA: Ceres:14216.                                   | 267112_at   | -0.7 |
| nodulin-like protein ; supported by cDNA: gi_16930478_gb_AF419593.1_AF419593                                                                  | 266993_at   | -0.7 |
| putative small nuclear ribonucleoprotein D2 ;supported by full-length cDNA: Ceres:26123.                                                      | 266482_at   | -0.7 |

|                                                                                                                                                     |             |      |
|-----------------------------------------------------------------------------------------------------------------------------------------------------|-------------|------|
| unknown protein                                                                                                                                     | 266445_at   | -0.7 |
| mevalonate diphosphate decarboxylase identical to GB:Y14325;supported by full-length cDNA: Ceres:35493.                                             | 266414_at   | -0.7 |
| hypothetical protein predicted by genefinder                                                                                                        | 266345_at   | -0.7 |
| Expressed protein ; supported by full-length cDNA: Ceres: 112146.                                                                                   | 266264_at   | -0.7 |
| unknown protein supported by cDNA: gi:13926173                                                                                                      | 265952_at   | -0.7 |
| putative peptide methionine sulfoxide reductase                                                                                                     | 265804_at   | -0.7 |
| Expressed protein ; supported by full-length cDNA: Ceres: 18284.                                                                                    | 265819_at   | -0.7 |
| hypothetical protein predicted by genefinder                                                                                                        | 265777_at   | -0.7 |
| unknown protein ;supported by full-length cDNA: Ceres:12246.                                                                                        | 265593_s_at | -0.7 |
| putative peroxidase ATP2a ;supported by full-length cDNA: Ceres:3571.                                                                               | 265471_at   | -0.7 |
| E2, ubiquitin-conjugating enzyme, putative ;supported by full-length cDNA: Ceres:27679.                                                             | 265357_at   | -0.7 |
| unknown protein                                                                                                                                     | 265143_at   | -0.7 |
| unknown protein 3 -end of protein contains similarity to thioredoxins; supported by cDNA: gi_15215811_gb_AY050435.1_                                | 265104_at   | -0.7 |
| unknown protein similar to unknown protein GB:AAD55495                                                                                              | 264893_at   | -0.7 |
| 3-hydroxy-3-methylglutaryl-coenzyme A reductase 2 (HMG2 protein catalyzes the conversion of 3-hydroxy-3-methylglutaryl-CoA to mevalonate, th        | 264855_at   | -0.7 |
| unknown protein similar to leucine-rich repeat protein GB:AAC79105; supported by cDNA: gi_12083225_gb_AF332409.1_AF332409                           | 264840_at   | -0.7 |
| putative thioredoxin-m similar to thioredoxin m-type precursor; similar to ESTs gb T13714, gb H76398, gb N37762, gb AA042639, gb T21104, emb        | 264845_at   | -0.7 |
| putative transcription factor similar to transcription factor SF3 (pir IS37656); similar to ESTs gb T42207, gb N37716, and emb Z17491;supported by  | 264462_at   | -0.7 |
| hypothetical protein predicted by genscan+                                                                                                          | 264337_at   | -0.7 |
| unknown protein strong similarity to hypothetical protein gb Y09823 from A. thaliana. ESTs gb T76118, gb T04263 and gb ATYU9823 come from th        | 264207_at   | -0.7 |
| bZIP-like protein similar to bZIP (leucine zipper) protein, GenBank Accession Number 600855                                                         | 264176_at   | -0.7 |
| proteasome alpha subunit, putative similar to proteasome alpha subunit GI:8671494 from [Oryza sativa]                                               | 264140_at   | -0.7 |
| putative DOF zinc finger protein ;supported by full-length cDNA: Ceres:16423.                                                                       | 264056_at   | -0.7 |
| 40S ribosomal protein S16 Same as GB:Q42340;supported by full-length cDNA: Ceres:29241.                                                             | 263821_s_at | -0.7 |
| 60s ribosomal protein L34 identical to GB:Q42351, location of EST 105E2T7, gb T22624;supported by full-length cDNA: Ceres:7182.                     | 263691_at   | -0.7 |
| putative ferredoxin-thioredoxin reductase ;supported by full-length cDNA: Ceres:40781.                                                              | 263624_at   | -0.7 |
| putative NAD+ dependent isocitrate dehydrogenase subunit 2, IDH2 genomic copy of ICDH2 cDNA U81994, ESTs R29962, R29955 catalyzes the               | 263583_at   | -0.7 |
| ADP-ribosylation factor 3                                                                                                                           | 263529_at   | -0.7 |
| hypothetical protein                                                                                                                                | 263442_at   | -0.7 |
| 40S ribosomal protein S14 ;supported by full-length cDNA: Ceres:41471.                                                                              | 263286_at   | -0.7 |
| acetyl-CoA carboxylase, putative similar to acetyl-CoA carboxylase GI:1100253 from [Arabidopsis thaliana]                                           | 263193_at   | -0.7 |
| 60s ribosomal protein l27a. similar to 60S RIBOSOMAL PROTEIN L27A GB:P49637 GI:1710530 from [Arabidopsis thaliana];supported by full-length         | 262985_s_at | -0.7 |
| E2, ubiquitin-conjugating enzyme, putative similar to DNA-binding protein GB:AAB72016 GI:1066082 from [Homo sapiens]; supported by cDNA: gi         | 262990_at   | -0.7 |
| unknown protein similar to pectinesterase GB:X85216 GI:732912 [Phaseolus vulgaris];supported by full-length cDNA: Ceres:33355.                      | 262844_at   | -0.7 |
| endomembrane protein, putative similar to endomembrane protein emp70 precursor isolog GB:AAF67014 GI:7677068 [Homo sapiens]; supported              | 262846_at   | -0.7 |
| unknown protein                                                                                                                                     | 262693_at   | -0.7 |
| ribosomal protein L18, putative similar to ribosomal protein L18 GI:3980238 from [Thermotoga maritima]                                              | 262235_at   | -0.7 |
| ribosomal protein S9, putative similar to ribosomal protein S9 GI:5456946 from [Arabidopsis thaliana]; supported by full-length cDNA: Ceres: 25038  | 262172_at   | -0.7 |
| ribosomal protein L30, putative similar to ribosomal protein L30 GI:388034 from [Homo sapiens]; supported by full-length cDNA: Ceres: 19274.        | 262163_at   | -0.7 |
| hypothetical protein predicted by genemark.hmm                                                                                                      | 262010_at   | -0.7 |
| J8-like protein similar to DnaJ homologue J8 GB:AAC72399 GI:3851670 from [Arabidopsis thaliana];supported by full-length cDNA: Ceres:4150.          | 261901_at   | -0.7 |
| ADP-ribosylation factor, putative similar to ADP-ribosylation factor GI:166586 from [Arabidopsis thaliana]                                          | 261831_at   | -0.7 |
| 40S ribosomal protein S12, putative similar to 40S ribosomal protein S12 GI:4263712 from [Arabidopsis thaliana];supported by full-length cDNA: C    | 261789_at   | -0.7 |
| unknown protein ; supported by full-length cDNA: Ceres: 30167.                                                                                      | 261790_at   | -0.7 |
| hypothetical protein similar to unknown protein GB:AAD23672 GI:4567258 from [Arabidopsis thaliana];supported by full-length cDNA: Ceres:40816.      | 261740_at   | -0.7 |
| tubulin alpha-6 chain, putative identical to tubulin alpha-6 chain GB:P29511 from [Arabidopsis thaliana];supported by full-length cDNA: Ceres:1538  | 261635_at   | -0.7 |
| DNA binding protein ACBF, putative similar to DNA binding protein ACBF GB:U90212 GI:1899187 from [Nicotiana tabacum]                                | 261603_at   | -0.7 |
| fatty acid elongase 3-ketoacyl-CoA synthase 1 identical to GB:AAC99312 GI:4091810 from [Arabidopsis thaliana]                                       | 261570_at   | -0.7 |
| polyphosphoinositide binding protein, putative similar to polyphosphoinositide binding protein Ssh2p GB:AAB94599 GI:2739046 from [Glycine max]      | 261563_at   | -0.7 |
| hypothetical protein predicted by genemark.hmm                                                                                                      | 261509_at   | -0.7 |
| ribosomal protein S15 identical to GB:AAA61608 from [Arabidopsis thaliana] (Plant Physiol. 106 (1), 401-402 (1994)); supported by full-length cDN.  | 261416_at   | -0.7 |
| ribosomal protein identical to GB:CAB81600 from [Arabidopsis thaliana];supported by full-length cDNA: Ceres:1097.                                   | 261362_s_at | -0.7 |
| pectinesterase, putative similar to GB:Z94058 from [Lycopersicon esculentum]; supported by cDNA: gi_16648888_gb_AY059814.1_                         | 261363_at   | -0.7 |
| Expressed protein ; supported by full-length cDNA: Ceres: 271765.                                                                                   | 261318_at   | -0.7 |
| C-8,7 sterol isomerase identical to GB:AAD03489 from [Arabidopsis thaliana] (Plant Mol. Biol. 38 (5), 807-815 (1998));supported by full-length cDN  | 261228_at   | -0.7 |
| ribosomal protein L11, putative similar to chloroplast ribosomal protein L11 GI:21312 from [Spinacia oleracea];supported by full-length cDNA: Cere: | 261190_at   | -0.7 |
| putative small nuclear ribonucleoprotein polypeptide F                                                                                              | 260564_at   | -0.7 |



|                                                                                                                                                   |             |      |
|---------------------------------------------------------------------------------------------------------------------------------------------------|-------------|------|
| 60S ribosomal protein L38                                                                                                                         | 260538_at   | -0.7 |
| putative ribosomal protein similar to ribosomal protein L33B GB:NP_014877 from [Saccharomyces cerevisiae]; supported by full-length cDNA: Cere    | 260258_at   | -0.7 |
| putative IAA6 protein similar to IAA6 protein GB:S5849 from [Arabidopsis thaliana];supported by full-length cDNA: Ceres:147711.                   | 260152_at   | -0.7 |
| NAM-like protein similar to NAM (no apical meristem) GB:CAA63101 from [Petunia x hybrida];supported by full-length cDNA: Ceres:21243.             | 260156_at   | -0.7 |
| hypothetical protein predicted by gensecan+;supported by full-length cDNA: Ceres:30065.                                                           | 260056_at   | -0.7 |
| unknown protein ; supported by cDNA: gi_15450975_gb_AY054568.1_                                                                                   | 260058_at   | -0.7 |
| hypothetical protein predicted by genemark.hmm                                                                                                    | 259850_at   | -0.7 |
| unknown protein                                                                                                                                   | 259655_at   | -0.7 |
| beta-glucosidase, putative identical to GI:6651430 from [Arabidopsis thaliana]; supported by cDNA: gi_14532461_gb_AY039855.1_                     | 259640_at   | -0.7 |
| hypothetical protein ; supported by cDNA: gi_14596112_gb_AY042844.1_                                                                              | 259515_at   | -0.7 |
| hypothetical protein                                                                                                                              | 259529_at   | -0.7 |
| putative 40S ribosomal protein S3A (S phase specific) similar to 40S ribosomal protein S3A (S phase specific protein GBIS289) GB:P49396 [Brassi   | 259096_at   | -0.7 |
| unknown protein similar to putative protein GB:CAB36768 [Arabidopsis thaliana];supported by full-length cDNA: Ceres:8898.                         | 259013_at   | -0.7 |
| putative 40S ribosomal protein S19 similar to 40S ribosomal protein S19 GB:P40978 [Oryza sativa]; supported by full-length cDNA: Ceres: 41619.    | 258858_at   | -0.7 |
| Expressed protein ; supported by full-length cDNA: Ceres: 5806.                                                                                   | 258859_at   | -0.7 |
| unknown protein ; supported by full-length cDNA: Ceres: 18019.                                                                                    | 258845_at   | -0.7 |
| unknown protein ;supported by full-length cDNA: Ceres:250294.                                                                                     | 258788_at   | -0.7 |
| unknown protein                                                                                                                                   | 258692_at   | -0.7 |
| unknown protein ;supported by full-length cDNA: Ceres:27471.                                                                                      | 258641_at   | -0.7 |
| apyrase (Atapy1) identical to apyrase (Atapy1) GB:AF093604 [Arabidopsis thaliana]; supported by cDNA: gi_6002630_gb_AF093604.1_AF093604           | 258567_at   | -0.7 |
| ribosomal protein L29, putative similar to ribosomal protein L29 GI:7959366 (Panax ginseng);supported by full-length cDNA: Ceres:315.             | 258532_at   | -0.7 |
| thioredoxin m4 identical to GB:AAF15951 from [Arabidopsis thaliana]; supported by full-length cDNA: Ceres: 42151.                                 | 258398_at   | -0.7 |
| putative ribosomal protein similar to ribosomal protein L37 GB:BAA04888 from [Homo sapiens];supported by full-length cDNA: Ceres:14710.           | 258284_at   | -0.7 |
| unknown protein contains Pfam profile: PF01738 Dienelactone hydrolase family;supported by full-length cDNA: Ceres:11339.                          | 258102_at   | -0.7 |
| putative 2Fe-2S iron-sulfur cluster protein contains Pfam profile: PF00111 2Fe-2S iron-sulfur cluster binding domains; supported by cDNA: gi_1459 | 258055_at   | -0.7 |
| unknown protein ; supported by cDNA: gi_7658238_gb_AF198179.1_AF198179                                                                            | 257913_at   | -0.7 |
| unknown protein ;supported by full-length cDNA: Ceres:32010.                                                                                      | 257831_at   | -0.7 |
| 60S ribosomal protein, putative similar to 60S RIBOSOMAL PROTEIN L30 GB:O49884 from [Lupinus luteus];supported by full-length cDNA: Ceres         | 257753_at   | -0.7 |
| Expressed protein ; supported by cDNA: gi_15810238_gb_AY056158.1_                                                                                 | 257706_at   | -0.7 |
| phosphate transporter, putative contains Pfam profile: PF01384 phosphate transporter family                                                       | 257311_at   | -0.7 |
| glutathione reductase, cytosolic identical to GB:P48641 from [Arabidopsis thaliana] (); supported by cDNA: gi_14532809_gb_AY040029.1_             | 257252_at   | -0.7 |
| disease resistance protein, putative similar to GB:AAD13301 from [Lycopersicon esculentum], contains Pfam profiles: PF00560 Leucine Rich Repe     | 257101_at   | -0.7 |
| myrosinase-associated protein, putative similar to myrosinase-associated protein GB:CAA71238 from [Brassica napus]                                | 257072_at   | -0.7 |
| hypothetical protein predicted by gensecan+                                                                                                       | 256984_at   | -0.7 |
| PREG-like protein, putative similar to PREG-like protein GB:AAC32127 from [Picea mariana]                                                         | 256894_at   | -0.7 |
| Expressed protein ; supported by full-length cDNA: Ceres: 8691.                                                                                   | 256856_at   | -0.7 |
| ATP sulfurylase, putative similar to ATP sulfurylase GB:AAF19185 [Arabidopsis thaliana];supported by full-length cDNA: Ceres:20342.               | 256835_at   | -0.7 |
| unknown protein                                                                                                                                   | 256433_at   | -0.7 |
| protein phosphatase 2C, putative contains Pfam profile: PF00481 Protein phosphatase 2C                                                            | 256279_at   | -0.7 |
| unknown protein ; supported by full-length cDNA: Ceres:19056.                                                                                     | 256215_at   | -0.7 |
| GTP-binding protein (SAR1B) identical to GTP-binding protein (SAR1B) [Arabidopsis thaliana (Mouse-ear cress)] SP:Q01474; supported by full-lenç   | 256224_at   | -0.7 |
| unknown protein ; supported by full-length cDNA: Ceres: 22928.                                                                                    | 256225_at   | -0.7 |
| pyruvate dehydrogenase E1 beta subunit, putative similar to pyruvate dehydrogenase E1 beta subunit GI:2982328 from [Picea mariana];supported      | 256160_at   | -0.7 |
| Expressed protein ; supported by full-length cDNA: Ceres: 11843.                                                                                  | 255968_at   | -0.7 |
| unknown protein                                                                                                                                   | 255764_at   | -0.7 |
| contains weak similarity to S. cerevisiae BOB1 protein (PIR:S45444)                                                                               | 255714_at   | -0.7 |
| putative transcription factor ; supported by cDNA: gi_15450989_gb_AY054575.1_                                                                     | 255538_at   | -0.7 |
| putative transposon protein                                                                                                                       | 255366_x_at | -0.7 |
| putative mitogen-activated protein kinase                                                                                                         | 255148_at   | -0.7 |
| putative protein disulfide isomerase                                                                                                              | 255061_at   | -0.7 |
| putative protein ascorbate peroxidase - Spinacia oleracea.PIR2:S66265;supported by full-length cDNA: Ceres:37435.                                 | 255078_at   | -0.7 |
| putative protein ;supported by full-length cDNA: Ceres:7769.                                                                                      | 254950_at   | -0.7 |
| MAP kinase (ATMPK5) possible internal deletion at position 161, missing one A residue; reference GI:457401; supported by cDNA: gi_457401_dbj      | 254924_at   | -0.7 |
| HhoA protease precursor, putative identical to putative protease HhoA precursor [Arabidopsis thaliana] SP:Q9SEL7 GI:6690272 (unpublished, Len     | 254669_at   | -0.7 |
| hypothetical protein                                                                                                                              | 254154_at   | -0.7 |
| DRE CRT-binding protein DREB1C involved in low-temperature-responsive gene expression00; supported by cDNA: gi_3738227_dbj_AB007789.1.            | 254075_at   | -0.7 |
| putative protein NorM, Vibrio parahaemolyticus, gb:AB010463                                                                                       | 254077_at   | -0.7 |

|                                                                                                                                                   |             |      |
|---------------------------------------------------------------------------------------------------------------------------------------------------|-------------|------|
| putative protein Human GS1 (protein of unknown function) mRNA, PID:g183653;supported by full-length cDNA: Ceres:98650.                            | 254039_at   | -0.7 |
| putative protein probable membrane protein YBL102w, yeast, PIR2:S45393                                                                            | 253967_at   | -0.7 |
| prochlorophyllide reductase precursor ;supported by full-length cDNA: Ceres:36741.                                                                | 253871_at   | -0.7 |
| Expressed protein ; supported by cDNA: gi_15809977_gb_AY054257.1_                                                                                 | 253877_at   | -0.7 |
| phytochrome-associated protein PAP2 ; supported by cDNA: gi_12083213_gb_AF332402.1_AF332402                                                       | 253749_at   | -0.7 |
| ribosomal protein S15a homolog ribosomal protein S15a - Brassica napus,PIR2:S20945; supported by full-length cDNA: Ceres: 18105.                  | 253726_at   | -0.7 |
| Expressed protein ; supported by full-length cDNA: Ceres: 26443.                                                                                  | 253694_at   | -0.7 |
| putative protein G protein beta subunit-like protein, Schistosoma mansoni, gb:U30261; supported by full-length cDNA: Ceres: 341.                  | 253645_at   | -0.7 |
| EST GB:N37377 spans last intron and 3' end of gene contains similarity to meiotic serine proteinase TMP GI:6468325 from [Lycopersicon esculentum] | 253650_at   | -0.7 |
| putative protein RING-H2 finger protein RHX1a - Arabidopsis thaliana,PID:g3790591; supported by cDNA: gi_15809839_gb_AY054187.1_                  | 253580_at   | -0.7 |
| AIG2-like protein AIG2 protein, Arabidopsis thaliana, PATCHX:G1127806                                                                             | 253545_at   | -0.7 |
| Expressed protein ; supported by full-length cDNA: Ceres: 24629.                                                                                  | 253291_at   | -0.7 |
| glucosyltransferase -like protein immediate-early salicylate-induced glucosyltransferase, Nicotiana tabacum, PIR2:T03747;supported by cDNA gi:1_  | 253268_s_at | -0.7 |
| peptidylprolyl isomerase (cyclophilin) ;supported by full-length cDNA: Ceres:37.                                                                  | 253221_at   | -0.7 |
| ferulate-5-hydroxylase (FAH1) ; supported by cDNA: gi_1488254_gb_U38416.1_ATU38416                                                                | 253088_at   | -0.7 |
| AtRer1A ; supported by full-length cDNA: Ceres: 21466.                                                                                            | 252913_at   | -0.7 |
| vacuolar H(+)-ATPase subunit-like protein Vacuolar proton pump subunit SFD alpha isoform - Homo sapiens, EMBL:AF112204; supported by cDN          | 252845_at   | -0.7 |
| glutathione transferase-like protein glutathione transferase, papaya, PIR:T09781;supported by full-length cDNA: Ceres:19003.                      | 252712_at   | -0.7 |
| 40S ribosomal protein 40S ribosomal proteinS20, Arabidopsis thaliana, pir:T12992                                                                  | 252601_s_at | -0.7 |
| GTP-binding protein ara-3 ; supported by cDNA: gi_14334917_gb_AY035132.1_                                                                         | 252514_at   | -0.7 |
| 40S ribosomal protein S20-like protein 40S RIBOSOMAL PROTEIN S20 - ARABIDOPSIS THALIANA,PID:g1350956;supported by full-length cDNA                | 252413_at   | -0.7 |
| MTN3-like protein MtN3 gene product - Medicago truncatula,PID:e1169583; supported by cDNA: gi_13605687_gb_AF361825.1_AF361825                     | 252327_at   | -0.7 |
| branched-chain-amino-acid transaminase -like protein branched-chain-amino-acid transaminase, Streptomyces coelicolor, PIR:T29053; supported       | 252274_at   | -0.7 |
| putative protein steroid dehydrogenase homolog - Homo sapiens, EMBL:AF078850;supported by full-length cDNA: Ceres:34560.                          | 252167_at   | -0.7 |
| peroxiredoxin - like protein peroxiredoxin TPx2, Arabidopsis thaliana, EMBL:AF121356; supported by cDNA: gi_15292892_gb_AY050880.1_               | 251993_at   | -0.7 |
| nuclear envelope membrane protein - like LBR integral nuclear envelope inner membrane protein, Homo sapiens, EMBL:HSLBR10; supported by c         | 251995_at   | -0.7 |
| uncoupling protein (ucp/PUMP) ; supported by cDNA: gi_7673022_gb_AF146226.1_AF146226                                                              | 251902_at   | -0.7 |
| putative protein hypothetical protein SPBC19C2.12 - Schizosaccharomyces pombe, PIR:T39803;supported by full-length cDNA: Ceres:92264.             | 251483_at   | -0.7 |
| putative protein hypothetical proteins At2g44600 - Arabidopsis thaliana, EMBL:AAC27462                                                            | 251459_at   | -0.7 |
| putative protein prib5, Ribes nigrum, EMBL:RNI7578;supported by full-length cDNA: Ceres:15792.                                                    | 251370_at   | -0.7 |
| ribosomal protein S13 -like AtRPS13A mRNA for cytoplasmic ribosomal protein S13, Arabidopsis thaliana.AB031739; supported by cDNA: gi_1419        | 251341_at   | -0.7 |
| ribosomal protein S27 ; supported by cDNA: gi_4193381_gb_AF083336.1_AF083336                                                                      | 251357_at   | -0.7 |
| putative protein                                                                                                                                  | 251270_at   | -0.7 |
| putative protein chloroplast ribosome recycling factor protein - Spinacia oleracea, EMBL:AJ133751; supported by cDNA: gi_13926251_gb_AF3728       | 251172_at   | -0.7 |
| anthranilate N-benzoyltransferase - like protein anthranilate N-benzoyltransferase, clove pink, PIR:T10717; supported by cDNA: gi_15912268_gb_    | 251144_at   | -0.7 |
| putative protein contains transmembrane region and ATP binding region, Mus musculus, EMBL:AB030189.1                                              | 250978_at   | -0.7 |
| putative RNA-binding protein astrocytic NOVA-like RNA-binding protein, Homo sapiens, U70477;supported by full-length cDNA: Ceres:25769.           | 250843_at   | -0.7 |
| GTP-binding protein (gb)AAD09203.1) ;supported by full-length cDNA: Ceres:6734.                                                                   | 250813_at   | -0.7 |
| Expressed protein ; supported by cDNA: gi_9909197_gb_AF175769.1_AF175769                                                                          | 250818_at   | -0.7 |
| cytochrome P450 90A1 (sp)Q42569) ; supported by full-length cDNA: Ceres: 36334.                                                                   | 250752_at   | -0.7 |
| 2-cys peroxiredoxin-like protein ;supported by full-length cDNA: Ceres:15640.                                                                     | 250733_at   | -0.7 |
| putative protein similar to unknown protein (gb)AAF02129.1);supported by full-length cDNA: Ceres:104017.                                          | 250734_at   | -0.7 |
| harpin-induced protein-like ; supported by cDNA: gi_9502175_gb_AF264699.1_AF264699                                                                | 250676_at   | -0.7 |
| putative protein similar to unknown protein (dbj)BAA86974.1);supported by full-length cDNA: Ceres:20752.                                          | 250687_at   | -0.7 |
| ABC transporter-like protein ; supported by cDNA: gi_14488081_gb_AF389289.1_AF389289                                                              | 250690_at   | -0.7 |
| nucleoid DNA-binding-like protein ;supported by full-length cDNA: Ceres:15560.                                                                    | 250661_at   | -0.7 |
| serine/threonine protein kinase ;supported by full-length cDNA: Ceres:5323.                                                                       | 250545_at   | -0.7 |
| pectin methylesterase - like protein pectin methylesterase, Melandrium album, EMBL:MAPME                                                          | 250490_at   | -0.7 |
| beta-xylosidase - like protein beta-xylosidase, Aspergillus nidulans, EMBL:ANXLND; supported by cDNA: gi_15982752_gb_AY057483.1_                  | 250444_at   | -0.7 |
| putative protein predicted proteins, Arabidopsis thaliana                                                                                         | 250417_at   | -0.7 |
| putative protein ; supported by cDNA: gi_15028030_gb_AY045872.1_                                                                                  | 250368_at   | -0.7 |
| putative protein                                                                                                                                  | 250330_at   | -0.7 |
| putative protein contains similarity to transmembrane transport protein;supported by full-length cDNA: Ceres:249596.                              | 250315_at   | -0.7 |
| putative protein ;supported by full-length cDNA: Ceres:5392.                                                                                      | 250289_at   | -0.7 |
| ubiquinol--cytochrome-c reductase - like protein non-consensus AT acceptor splice site at exon 2, ubiquinol--cytochrome-c reductase, Solanum tub  | 250235_s_at | -0.7 |
| receptor-like protein kinase                                                                                                                      | 250102_at   | -0.7 |
| putative protein similar to unknown protein (sp)P50027);supported by full-length cDNA: Ceres:17002.                                               | 250079_at   | -0.7 |

|                                                                                                                                                 |           |      |
|-------------------------------------------------------------------------------------------------------------------------------------------------|-----------|------|
| putative protein similar to unknown protein (dbj BAA90342.1);supported by full-length cDNA: Ceres:1816.                                         | 250027_at | -0.7 |
| putative protein similar to unknown protein (emb CAB88996.1); supported by full-length cDNA: Ceres: 7688.                                       | 249943_at | -0.7 |
| PGPD14 protein ;supported by full-length cDNA: Ceres:41666.                                                                                     | 249862_at | -0.7 |
| 2-isopropylmalate synthase-like protein                                                                                                         | 249867_at | -0.7 |
| unknown protein ;supported by full-length cDNA: Ceres:25723.                                                                                    | 249811_at | -0.7 |
| Expressed protein ; supported by full-length cDNA: Ceres: 19092.                                                                                | 249778_at | -0.7 |
| cationic amino acid transporter -like protein cationic amino acid transporter-1, rat, PIR:T46813                                                | 249640_at | -0.7 |
| His-Asp Phosphotransfer Signal Transducer AHP3 ; supported by cDNA: gi_15293020_gb_AY050944.1_                                                  | 249473_at | -0.7 |
| glutaredoxin -like protein glutaredoxin, castor bean, PIR:S54825; supported by full-length cDNA: Ceres: 23800.                                  | 249380_at | -0.7 |
| succinate dehydrogenase iron-protein subunit -like succinate dehydrogenase iron-protein subunit (SDHB), Oryza sativa, EMBL:AB017428; support    | 249343_at | -0.7 |
| Expressed protein ; supported by cDNA: gi_13605534_gb_AF361593.1_AF361593                                                                       | 249268_at | -0.7 |
| Cys2/His2-type zinc finger protein 3 (dbj BAA85109.1) ;supported by full-length cDNA: Ceres:9878.                                               | 249139_at | -0.7 |
| aluminum-induced protein-like ; supported by full-length cDNA: Ceres: 12484.                                                                    | 249121_at | -0.7 |
| phytochelatin synthase (gb AAD41794.1) ; supported by cDNA: gi_14532653_gb_AY039951.1_                                                          | 249078_at | -0.7 |
| putative protein similar to unknown protein (pir T04881)                                                                                        | 249021_at | -0.7 |
| serine threonine protein kinase ; supported by cDNA: gi_14486383_gb_AY035225.1_                                                                 | 248910_at | -0.7 |
| Rab-type small GTP-binding protein-like ; supported by full-length cDNA: Ceres: 102017.                                                         | 248914_at | -0.7 |
| MutT domain protein-like ; supported by cDNA: gi_14596036_gb_AY042806.1_                                                                        | 248765_at | -0.7 |
| ribosomal protein S27 ;supported by full-length cDNA: Ceres:8698.                                                                               | 248747_at | -0.7 |
| drought-induced protein Di19-like protein ; supported by cDNA: gi_13937215_gb_AF372963.1_AF372963                                               | 248595_at | -0.7 |
| Expressed protein ; supported by cDNA: gi_7715088_gb_AF216756.1_AF216756                                                                        | 248511_at | -0.7 |
| trehalose-6-phosphate phosphatase ; supported by cDNA: gi_2944177_gb_AF007778.1_AF007778                                                        | 248404_at | -0.7 |
| histone H2A (gb AAF64418.1) ; supported by full-length cDNA: Ceres: 4875.                                                                       | 248175_at | -0.7 |
| unknown protein                                                                                                                                 | 248068_at | -0.7 |
| CONSTANS-like B-box zinc finger protein-like ;supported by full-length cDNA: Ceres:6639.                                                        | 247921_at | -0.7 |
| ribosomal protein S4 - like ribosomal protein S4, Arabidopsis thaliana, PIR:T48480;supported by full-length cDNA: Ceres:22434.                  | 247815_at | -0.7 |
| dTDP-glucose 4-6-dehydratase - like protein dTDP-glucose 4-6-dehydratase, Cicer arietinum, EMBL:CAR275318;supported by full-length cDNA: C      | 247720_at | -0.7 |
| putative protein COP1-interacting protein CIP8, Arabidopsis thaliana, EMBL:AF162150; supported by cDNA: gi_15450686_gb_AY052711.1_              | 247708_at | -0.7 |
| putative protein various predicted proteins from prokaryotic and eukaryotic species; supported by cDNA: gi_14190378_gb_AF378867.1_AF378867      | 247642_at | -0.7 |
| 60S ribosomal protein L12 - like 60S RIBOSOMAL PROTEIN L12 (like), Arabidopsis thaliana, PIR:T45883;supported by full-length cDNA: Ceres:42     | 247584_at | -0.7 |
| DNA binding protein - like DNA binding protein EREBP-4, Nicotiana tabacum, PIR:T02434;supported by full-length cDNA: Ceres:92102.               | 247543_at | -0.7 |
| putative protein various predicted proteins, Arabidopsis thaliana; supported by full-length cDNA: Ceres: 6441.                                  | 247464_at | -0.7 |
| dihydroneopterin aldolase-like protein                                                                                                          | 247409_at | -0.7 |
| putative protein contains similarity to acetyltransferase; supported by full-length cDNA: Ceres: 31971.                                         | 247330_at | -0.7 |
| unknown protein                                                                                                                                 | 247169_at | -0.7 |
| GATA-binding transcription factor-like protein                                                                                                  | 247086_at | -0.7 |
| receptor-like protein kinase ;supported by full-length cDNA: Ceres:110712.                                                                      | 246986_at | -0.7 |
| unknown protein ;supported by full-length cDNA: Ceres:2518.                                                                                     | 247006_at | -0.7 |
| unknown protein ;supported by full-length cDNA: Ceres:9946.                                                                                     | 247009_at | -0.7 |
| putative multispansing membrane protein GC donor splice site at exon 6; KIAA0255 - Homo sapiens, EMBL:D87444; supported by cDNA: gi_1343        | 246923_at | -0.7 |
| AtBgamma - like protein B regulatory subunit of PP2A, Arabidopsis thaliana, EMBL:ATU73528; supported by cDNA: gi_16604606_gb_AY059748.          | 246907_at | -0.7 |
| protein phosphatase-2C PP2C-like ; supported by cDNA: gi_16974563_gb_AY061752.1_                                                                | 246622_at | -0.7 |
| 40S RIBOSOMAL PROTEIN S19 - like 40S RIBOSOMAL PROTEIN S19 - Oryza sativa, SWISSPROT:RS19_ORYSA;supported by full-length cDN                    | 246538_at | -0.7 |
| proline-rich protein other proline-rich proteins                                                                                                | 246519_at | -0.7 |
| phosphoribosyl-ATP pyrophosphohydrolase (At-IE) identical to phosphoribosyl-ATP pyrophosphohydrolase (At-IE) [Arabidopsis thaliana] Gl:34618;   | 246265_at | -0.7 |
| cytochrome-b5 reductase - like protein cytochrome-b5 reductase, Saccharomyces cerevisiae, PIR:S37800;supported by full-length cDNA: Ceres:3;    | 246157_at | -0.7 |
| putative protein predicted proteins, Homo sapiens and Caenorhabditis elegans; supported by full-length cDNA: Ceres: 31390.                      | 246008_at | -0.7 |
| putative protein predicted proteins, Drosophila melanogaster and Caenorhabditis elegans                                                         | 246015_at | -0.7 |
| ribosomal protein L10-like ribosomal protein L10- Nicotiana tabacum, EMBL:AB010879;supported by full-length cDNA: Ceres:29083.                  | 245852_at | -0.7 |
| defender against cell death protein, putative similar to defender against cell death protein GB:AAC36169 Gl:3608136 from [Arabidopsis thaliana] | 245791_at | -0.7 |
| RNA-binding glycine-rich protein, putative similar to RNA-binding glycine-rich protein (RGP-1a) Gl:436789 from [Nicotiana sylvestris]           | 245778_at | -0.7 |
| MAP kinase, putative similar to MAP kinase kinase 5 Gl:3219273 from [Arabidopsis thaliana];supported by full-length cDNA: Ceres:112118.         | 245731_at | -0.7 |
| cytochrome c oxidoreductase like protein                                                                                                        | 245524_at | -0.7 |
| cyanohydrin lyase like protein ;supported by full-length cDNA: Ceres:5546.                                                                      | 245349_at | -0.7 |
| hypothetical protein ;supported by full-length cDNA: Ceres:22637.                                                                               | 245364_at | -0.7 |
| ribosomal protein ; supported by full-length cDNA: Ceres: 18153.                                                                                | 245311_at | -0.7 |
| hypothetical protein ;supported by full-length cDNA: Ceres:40736.                                                                               | 245331_at | -0.7 |

|                                                                                                                                                   |           |      |
|---------------------------------------------------------------------------------------------------------------------------------------------------|-----------|------|
| hypothetical protein ; supported by cDNA: gi_15912320_gb_AY056438.1_                                                                              | 245266_at | -0.7 |
| Expressed protein ; supported by full-length cDNA: Ceres: 19973.                                                                                  | 245198_at | -0.7 |
| unknown protein ; supported by cDNA: gi_15215824_gb_AY050442.1_                                                                                   | 245123_at | -0.7 |
| NADH dehydrogenase subunit                                                                                                                        | 245010_at | -0.7 |
| PSI J protein                                                                                                                                     | 244967_at | -0.7 |
| PSII T protein                                                                                                                                    | 244973_at | -0.7 |
| NADH dehydrogenase ND4                                                                                                                            | 244962_at | -0.7 |
| hypothetical protein predicted by genemark.hmm                                                                                                    | 257556_at | -0.7 |
| putative growth regulator protein similar to Nicotiana tabacum auxin-independent growth promoter, axi 1 gi 559921                                 | 262647_at | -0.7 |
| hypothetical protein predicted by genemark.hmm;supported by full-length cDNA: Ceres:10873.                                                        | 256452_at | -0.7 |
| hypothetical protein                                                                                                                              | 252535_at | -0.7 |
| receptor protein kinase (IRK1), putative similar to receptor protein kinase (IRK1) GI:836953 from [Ipomoea trifida]                               | 264757_at | -0.7 |
| putative aspartyl protease contains Pfam profile: PF00026 Eukaryotic aspartyl proteases; similar to (CND41) chloroplast nucleoid DNA binding prot | 261346_at | -0.7 |
| unknown protein                                                                                                                                   | 267623_at | -0.6 |
| putative C2H2-type zinc finger protein likely a nucleic acid binding protein; supported by cDNA: gi_14517523_gb_AY039597.1_                       | 267535_at | -0.6 |
| unknown protein                                                                                                                                   | 267516_at | -0.6 |
| putative UDP-N-acetylglucosamine pyrophosphorylase ;supported by full-length cDNA: Ceres:5509.                                                    | 267432_at | -0.6 |
| putative thromboxane-A synthase ; supported by cDNA: gi_15810029_gb_AY054283.1_                                                                   | 267380_at | -0.6 |
| hypothetical protein predicted by genefinder                                                                                                      | 267161_at | -0.6 |
| high affinity Ca2+ antiporter identical to GB:U57411, except a possible frameshift at base 58008. Sequence has been confirmed with 5 sequencin    | 267093_at | -0.6 |
| 60S ribosomal protein L23A identical to GB:AF034694;supported by full-length cDNA: Ceres:22479.                                                   | 266981_at | -0.6 |
| unknown protein ; supported by full-length cDNA: Ceres: 10164.                                                                                    | 266789_at | -0.6 |
| 60S ribosomal protein L31 ; supported by cDNA: gi_15450424_gb_AY052313.1_                                                                         | 266700_at | -0.6 |
| putative tryptophanyl-tRNA synthetase                                                                                                             | 266648_at | -0.6 |
| putative Na+-dependent inorganic phosphate cotransporter                                                                                          | 266672_at | -0.6 |
| glutathione S-transferase (GST6) identical to GB:X95295. Based on identical cDNA hits, the translation is now 40 AAs longer at the N-terminal, an | 266461_at | -0.6 |
| hypothetical protein predicted by grai                                                                                                            | 266474_at | -0.6 |
| putative strictosidine synthase identical to GB:AF076979; involved in alkaloid biosynthesis                                                       | 266391_at | -0.6 |
| unknown protein identical to GB:AAB82643supported by full-length cDNA: Ceres:17187.                                                               | 266123_at | -0.6 |
| unknown protein ;supported by full-length cDNA: Ceres:34688.                                                                                      | 266137_at | -0.6 |
| putative multispinning membrane protein similar to MURA transposase of maize Mutator transposon                                                   | 265994_at | -0.6 |
| unknown protein predicted by genscan and genefinder                                                                                               | 266004_at | -0.6 |
| unknown protein ; supported by cDNA: gi_15027852_gb_AY045783.1_                                                                                   | 265773_at | -0.6 |
| unknown protein                                                                                                                                   | 265720_at | -0.6 |
| putative chlorophyll a/b binding protein ; supported by full-length cDNA: Ceres: 6454.                                                            | 265722_at | -0.6 |
| putative hydrolase ; supported by cDNA: gi_15982855_gb_AY057535.1_                                                                                | 265680_at | -0.6 |
| unknown protein predicted by genscan; supported by cDNA: gi_13877800_gb_AF370163.1_AF370163                                                       | 265663_at | -0.6 |
| F-box protein family, AtFBL6 contains similarity to grr1 GI:2407790 from [Glycine max]                                                            | 265633_at | -0.6 |
| unknown protein ;supported by full-length cDNA: Ceres:10730.                                                                                      | 265611_at | -0.6 |
| putative dioxygenase ; supported by cDNA: gi_15292706_gb_AY050787.1_                                                                              | 265615_at | -0.6 |
| putative phosphate/phosphoenolpyruvate translocator protein ; supported by cDNA: gi_15809997_gb_AY054267.1_                                       | 265617_at | -0.6 |
| unknown protein                                                                                                                                   | 265620_at | -0.6 |
| 60S ribosomal protein L12 ;supported by full-length cDNA: Ceres:23523.                                                                            | 265445_at | -0.6 |
| putative ribosomal protein L6 ; supported by full-length cDNA: Ceres: 692.                                                                        | 265338_at | -0.6 |
| unknown protein                                                                                                                                   | 265245_at | -0.6 |
| unknown protein ; supported by cDNA: gi_14335017_gb_AY037188.1_                                                                                   | 265189_at | -0.6 |
| hypothetical protein similar to hypothetical protein GB:AAB61516 from F21J9;supported by full-length cDNA: Ceres:27548.                           | 264869_at | -0.6 |
| unknown protein similar to ESTs embj Z27038, gb AA451546, embj Z29876, gb T45359 and gb R90316;supported by full-length cDNA: Ceres:1114-         | 264837_at | -0.6 |
| serine threonine protein phosphatase (type 2A) identical to type 2A serine threonine protein phosphatase GB:AAC49668 (Arabidopsis thaliana); sup  | 264703_at | -0.6 |
| putative chloroplast nucleoid DNA-binding protein contains similarity to peptidase family A1                                                      | 264619_at | -0.6 |
| unknown protein ; supported by cDNA: gi_14039801_gb_AF366368.1_AF366368                                                                           | 264547_at | -0.6 |
| putative glutathione S-transferase TSI-1 similar to glutathione S-transferase (sp Q03666 GTX4_TOBAC); similar to EST gb H36275; supported by c    | 264435_at | -0.6 |
| unknown protein predicted by genemark.hmm; supported by full-length cDNA: Ceres: 31830.                                                           | 264306_at | -0.6 |
| unknown protein contains similarity to ycf37 gene product gb 1001425 from Synechocystis sp. genome gb D63999. ESTs gb T43026, gb R64902, c        | 264199_at | -0.6 |
| putative cyclin-dependent kinase regulatory subunit ;supported by full-length cDNA: Ceres:5750.                                                   | 264070_at | -0.6 |
| unknown protein ;supported by full-length cDNA: Ceres:36719.                                                                                      | 263796_at | -0.6 |
| unknown protein                                                                                                                                   | 263750_at | -0.6 |

|                                                                                                                                                        |             |      |
|--------------------------------------------------------------------------------------------------------------------------------------------------------|-------------|------|
| putative 60s ribosomal protein L10 Nearly identical to ribosomal protein L10.e, Wilm s tumor suppressor homologue, gi 17682 (Z15157), however d        | 263686_at   | -0.6 |
| unknown protein similar to unknown protein GB:AAC79135, ESTs gb T20423, gb AA712864, gb H76323 and gb Z25560 come from this gene;supported             | 263704_at   | -0.6 |
| unknown protein ESTs gb N65789,gb T04628 come from this gene;supported by full-length cDNA: Ceres:28606.                                               | 263660_at   | -0.6 |
| unknown protein EST gb T45093 comes from this gene;supported by full-length cDNA: Ceres:8374.                                                          | 263661_at   | -0.6 |
| 60S ribosomal protein L39                                                                                                                              | 263585_at   | -0.6 |
| 40S ribosomal protein; contains C-terminal domain ; supported by cDNA: gi_14190418_gb_AF378887.1_AF378887                                              | 263400_s_at | -0.6 |
| putative CCCH-type zinc finger protein also an ankyrin-repeat protein                                                                                  | 263379_at   | -0.6 |
| alanine-glyoxylate aminotransferase ;supported by full-length cDNA: Ceres:8306.                                                                        | 263350_at   | -0.6 |
| unknown protein ;supported by full-length cDNA: Ceres:5198.                                                                                            | 263048_s_at | -0.6 |
| pollen allergen-like protein similar to major allergen Bet v 1 GB:CAA96544 GI:1321726 from [Betula pendula]; supported by full-length cDNA: Ceres      | 263034_at   | -0.6 |
| tubulin beta-1 chain identical to GB:P12411 GI:135442 from [Arabidopsis thaliana](Gene 63 (1), 87-102 (1988))                                          | 262978_at   | -0.6 |
| unknown protein ;supported by full-length cDNA: Ceres:15169.                                                                                           | 262876_at   | -0.6 |
| signal response protein (GAI) identical to GAI GB:CAA75492 GI:2569938 [Arabidopsis thaliana] (Genes Dev. In press); supported by cDNA: gi_166          | 262850_at   | -0.6 |
| putative pyrophosphate-dependent phosphofructokinase alpha subunit similar to GB:AAC67587 from [Citrus X paradisi] and GB:Q41140 from [Ricir           | 262806_at   | -0.6 |
| putative DNA binding protein similar to gb U90212 DNA binding protein ACBF from Nicotiana tabacum and contains 3 PF 00076 RNA recognition n            | 262824_at   | -0.6 |
| putative calcium-transporting ATPase similar to gb AF038007 FIC1 gene from Homo sapiens and is a member of the PF 00122 E1-E2 ATPase famil             | 262772_at   | -0.6 |
| unknown protein                                                                                                                                        | 262700_at   | -0.6 |
| putative RING-H2 zinc finger protein ESTs gb N37587, gb T04684, gb AA394318, gb Z35014 and gb AA713343 come from this gene;supported by                | 262590_at   | -0.6 |
| auxin response factor 1, putative similar to auxin response factor 1 GI:2245378 from [Arabidopsis thaliana]                                            | 262566_at   | -0.6 |
| hypothetical protein similar to hypothetical protein GB:AAD50047 GI:5734782 from [Arabidopsis thaliana];supported by full-length cDNA: Ceres:967       | 262417_at   | -0.6 |
| unknown protein identical to hypothetical protein GB:AAD46040 GI:5668814 from (Arabidopsis thaliana);supported by full-length cDNA: Ceres:1061         | 262442_at   | -0.6 |
| hypothetical protein contains similarity to disulphide isomerase GI:4581959 from [Caenorhabditis briggsae]; supported by cDNA: gi_16649012_gb_/_       | 262413_at   | -0.6 |
| phosphoglucomutase, putative similar to phosphoglucomutase GI:534981 from [Spinacia oleracea]                                                          | 262309_at   | -0.6 |
| hypothetical protein predicted by genemark.hmm;supported by full-length cDNA: Ceres:40196.                                                             | 262284_at   | -0.6 |
| Expressed protein ; supported by full-length cDNA: Ceres: 7260.                                                                                        | 262058_at   | -0.6 |
| sterol delta7 reductase identical to GB:AAF63498 GI:7542561 from [Arabidopsis thaliana]; supported by cDNA: gi_1245181_gb_U49398.1_ATU493              | 261865_at   | -0.6 |
| thioredoxin h, putative similar to thioredoxin h GI:4928460 from [Hevea brasiliensis];supported by full-length cDNA: Ceres:2054.                       | 261821_at   | -0.6 |
| UDP glucose:flavonoid 3-o-glucosyltransferase, putative similar to UDP glucose:flavonoid 3-o-glucosyltransferase GB:AAB81683 GI:2564114 from           | 261804_at   | -0.6 |
| hypothetical protein contains similarity to amino acid permease GI:7415521 from [Oryza sativa]                                                         | 261785_at   | -0.6 |
| hypoxanthine ribosyl transferase, putative similar to hypoxanthine ribosyl transferase GB:AAC46403 GI:2689037 from [Vibrio parahaemolyticus];su        | 261516_at   | -0.6 |
| hypothetical protein predicted by genemark.hmm;supported by full-length cDNA: Ceres:36233.                                                             | 261483_at   | -0.6 |
| E2, ubiquitin-conjugating enzyme 1 (UBC1) identical to gi:431259, SP:P25865;supported by full-length cDNA: Ceres:18146.                                | 261484_at   | -0.6 |
| hypothetical protein contains similarity to cytochrome c oxidase subunit I GI:5678701 from [Loligo pealeii]; supported by full-length cDNA: Ceres: 314 | 261489_at   | -0.6 |
| Expressed protein ; supported by cDNA: gi_15293296_gb_AY051082.1_                                                                                      | 261417_at   | -0.6 |
| DNA repair protein RAD23, putative similar to RAD23 protein, isoform II GI:1914684 from [Daucus carota];supported by full-length cDNA: Ceres:40        | 261352_at   | -0.6 |
| unknown protein ; supported by cDNA: gi_14334567_gb_AY034957.1_                                                                                        | 261273_at   | -0.6 |
| Expressed protein ; supported by full-length cDNA: Ceres: 13526.                                                                                       | 261203_at   | -0.6 |
| unknown protein contains Pfam profile: PF02190 ATP-dependent protease La (LON) domain                                                                  | 261141_at   | -0.6 |
| unknown protein                                                                                                                                        | 261029_at   | -0.6 |
| unknown protein ;supported by full-length cDNA: Ceres:143451.                                                                                          | 260724_at   | -0.6 |
| putative WRKY-type DNA binding protein ;supported by full-length cDNA: Ceres:114256.                                                                   | 260528_at   | -0.6 |
| endomembrane protein EMP70 precursor isolog ; supported by cDNA: gi_15451171_gb_AY054666.1_                                                            | 260482_at   | -0.6 |
| putative 40S ribosomal protein SA (laminin receptor-like protein) identical to laminin receptor-like protein GB:U01955 [Arabidopsis thaliana];support  | 260426_at   | -0.6 |
| unknown protein ;supported by full-length cDNA: Ceres:18367.                                                                                           | 260367_at   | -0.6 |
| unknown protein contains Pfam profile: PF00561 alpha/beta hydrolase fold                                                                               | 260297_at   | -0.6 |
| putative dolichyl-phosphate mannosyltransferase polypeptide 2 similar to dolichyl-phosphate mannosyltransferase polypeptide 2 GB:4503365 (Hom          | 260257_at   | -0.6 |
| unknown protein ;supported by full-length cDNA: Ceres:151718.                                                                                          | 260106_at   | -0.6 |
| hypothetical protein predicted by genefinder;supported by full-length cDNA: Ceres:28316.                                                               | 260078_at   | -0.6 |
| Expressed protein ; supported by cDNA: gi_15529158_gb_AY052203.1_                                                                                      | 260012_at   | -0.6 |
| unknown protein                                                                                                                                        | 259847_at   | -0.6 |
| putative phosphatidylinositol-4-phosphate-5-kinase similar to phosphatidylinositol-4-phosphate-5-kinase GB:CAB53377 [Arabidopsis thaliana]             | 259677_at   | -0.6 |
| nitrate reductase 1 (NR1) identical to nitrate reductase 1 (NR1) GB:P11832 [Arabidopsis thaliana]; supported by cDNA: gi_15983498_gb_AF42462-          | 259681_at   | -0.6 |
| hypothetical protein predicted by genemark.hmm;supported by full-length cDNA: Ceres:21940.                                                             | 259663_at   | -0.6 |
| nuclear transport factor 2, putative similar to nuclear transport factor 2 (NTF2) [Oryza sativa] GI:5360221; supported by full-length cDNA: Ceres: 27  | 259593_at   | -0.6 |
| serine carboxypeptidase II, putative similar to H.vulgare gene encoding serine carboxypeptidase II, CP-MII GI:1731989; supported by cDNA: gi_16        | 259599_at   | -0.6 |
| hypothetical protein similar to ripening-induced protein [Fragaria vesca] GI:2465015;supported by full-length cDNA: Ceres:16091.                       | 259548_at   | -0.6 |
| chlorophyll binding protein, putative similar to chlorophyll binding protein GI:169213 from [Petunia hybrida]                                          | 259491_at   | -0.6 |

|                                                                                                                                                                                                                                        |             |      |
|----------------------------------------------------------------------------------------------------------------------------------------------------------------------------------------------------------------------------------------|-------------|------|
| unknown protein ;supported by full-length cDNA: Ceres:13659.                                                                                                                                                                           | 259477_at   | -0.6 |
| unknown protein ; supported by cDNA: gi_16604552_gb_AY059721.1_                                                                                                                                                                        | 259349_at   | -0.6 |
| unknown protein ;supported by full-length cDNA: Ceres:7246.                                                                                                                                                                            | 259257_at   | -0.6 |
| reversibly glycosylated polypeptide-1 identical to reversibly glycosylated polypeptide-1 (implicated in cell wall biosynthesis) GB:AA050000 [Arabidopsis thaliana]                                                                     | 259077_s_at | -0.6 |
| unknown protein similar to hin1 GB:CAA68848 [Nicotiana tabacum];supported by full-length cDNA: Ceres:8166.                                                                                                                             | 259102_at   | -0.6 |
| unknown protein ; supported by cDNA: gi_13877548_gb_AF370475.1_AF370475                                                                                                                                                                | 259023_at   | -0.6 |
| hypothetical protein predicted by genscan+                                                                                                                                                                                             | 258972_at   | -0.6 |
| Expressed protein ; supported by full-length cDNA: Ceres: 2153.                                                                                                                                                                        | 258919_at   | -0.6 |
| unknown protein ; supported by cDNA: gi_15294217_gb_AF410300.1_AF410300                                                                                                                                                                | 258839_at   | -0.6 |
| hypothetical protein predicted by genscan+;supported by full-length cDNA: Ceres:21672.                                                                                                                                                 | 258742_at   | -0.6 |
| unknown protein ; supported by full-length cDNA: Ceres: 9458.                                                                                                                                                                          | 258681_at   | -0.6 |
| putative isocitrate dehydrogenase (NAD+) similar to isocitrate dehydrogenase (NAD+) GB:CAA65502 [Nicotiana tabacum];supported by full-length cDNA: Ceres:9458.                                                                         | 258655_at   | -0.6 |
| putative protein kinase contains Pfam profiles: PF00069 Eukaryotic protein kinase domain, PF00560 Leucine Rich Repeat (5 copies); supported by full-length cDNA: Ceres:9458.                                                           | 258616_at   | -0.6 |
| unknown protein ; supported by cDNA: gi_13605546_gb_AF361599.1_AF361599                                                                                                                                                                | 258623_at   | -0.6 |
| ATP citrate lyase, putative similar to ATP citrate lyase GI:5304837 (Cyanophora paradoxa); supported by cDNA: gi_15292848_gb_AY050858.1_                                                                                               | 258515_at   | -0.6 |
| hypothetical protein predicted by genemark.hmm; supported by cDNA: gi_15450370_gb_AY052286.1_                                                                                                                                          | 258501_at   | -0.6 |
| Expressed protein ; supported by full-length cDNA: Ceres: 6490.                                                                                                                                                                        | 258470_at   | -0.6 |
| AP2 domain containing protein RAP2.3 identical to GB:AA049769 from [Arabidopsis thaliana];supported by full-length cDNA: Ceres:35981.                                                                                                  | 258434_at   | -0.6 |
| putative RAS-related GTP-binding protein similar to RAS-related GTP-binding protein GB:AA022451.1 from [Gossypium hirsutum];supported by full-length cDNA: Ceres:35981.                                                                | 258314_at   | -0.6 |
| putative transcription factor similar to transcription factor GB:CAA74050 from [Arabidopsis thaliana]                                                                                                                                  | 258198_at   | -0.6 |
| Eukaryotic initiation factor 4A, putative supported by cDNA: Ceres:29310, gi:15293046, gi:15450485                                                                                                                                     | 258210_at   | -0.6 |
| hypothetical protein predicted by genscan+;supported by full-length cDNA: Ceres:98961.                                                                                                                                                 | 258089_at   | -0.6 |
| ubiquitin-specific protease 7 (UBP7), putative similar to GI:11993467; supported by cDNA: gi_11993466_gb_AF302661.1_AF302661                                                                                                           | 258045_at   | -0.6 |
| unknown protein ; supported by cDNA: gi_15809843_gb_AY054189.1_                                                                                                                                                                        | 257988_at   | -0.6 |
| hypothetical protein predicted by genscan+                                                                                                                                                                                             | 257962_at   | -0.6 |
| HAL3A protein identical to GB:AA051616 from [Arabidopsis thaliana]                                                                                                                                                                     | 257897_at   | -0.6 |
| immunophilin (FKBP15-1) identical to immunophilin (FKBP15-1) GB:U52046 [Arabidopsis thaliana] (Proc. Natl. Acad. Sci. U.S.A. 93 (14), 6964-6968)                                                                                       | 257820_at   | -0.6 |
| unknown protein ;supported by full-length cDNA: Ceres:121435.                                                                                                                                                                          | 257745_at   | -0.6 |
| 20S proteasome beta subunit (PBB1) identical to 20S proteasome beta subunit PBB1 (PBB1) GB:AA032066 [Arabidopsis thaliana] (Genetics 149 (4), 1003-1010)                                                                               | 257711_at   | -0.6 |
| hypothetical protein predicted by genemark.hmm                                                                                                                                                                                         | 257687_at   | -0.6 |
| hydrolase, putative similar to Metal Dependent Hydrolase GB:AA018619 from [Chlamydomonas reinhardtii]                                                                                                                                  | 257602_at   | -0.6 |
| unknown protein                                                                                                                                                                                                                        | 257088_at   | -0.6 |
| unknown protein                                                                                                                                                                                                                        | 256982_at   | -0.6 |
| prefoldin-like protein similar to prefoldin subunit 2 GB:AAF17218 from [Homo sapiens]; supported by full-length cDNA: Ceres: 264413.                                                                                                   | 256936_at   | -0.6 |
| unknown protein                                                                                                                                                                                                                        | 256948_at   | -0.6 |
| glycine-rich RNA binding protein, putative similar to glycine-rich RNA binding protein 2 (AtGRP2) GB:CAA05727 [Arabidopsis thaliana]; contains Pfam profile: PF01649 ribosomal protein S20;supported by full-length cDNA: Ceres:24271. | 256890_at   | -0.6 |
| 30S ribosomal protein S20 contains Pfam profile: PF01649 ribosomal protein S20;supported by full-length cDNA: Ceres:24271.                                                                                                             | 256855_at   | -0.6 |
| unknown protein similar to aluminum-induced protein GB:BAA25999 [Brassica napus]                                                                                                                                                       | 256829_at   | -0.6 |
| putative disease resistance protein similar to disease resistance protein GB:AA078591 [Lycopersicon esculentum]                                                                                                                        | 256431_s_at | -0.6 |
| putative nucleic acid binding protein similar to nucleic acid binding protein Alfin-1 GB:AAA20093 [Medicago sativa]; supported by full-length cDNA: Ceres:11578.                                                                       | 256414_at   | -0.6 |
| DnaJ protein, putative contains Pfam profile: PF00226 DnaJ domain                                                                                                                                                                      | 256320_at   | -0.6 |
| epsilon subunit of mitochondrial F1-ATPase identical to epsilon subunit of mitochondrial F1-ATPase [Arabidopsis thaliana] GI:1655486; supported by full-length cDNA: Ceres:11578.                                                      | 256184_at   | -0.6 |
| unknown protein ; supported by cDNA: gi_14423501_gb_AF386988.1_AF386988                                                                                                                                                                | 256115_at   | -0.6 |
| unknown protein contains similarity to ubiquitin/ribosomal protein GI:1763015 from [Gallus gallus]                                                                                                                                     | 255951_at   | -0.6 |
| unknown protein ;supported by full-length cDNA: Ceres:11578.                                                                                                                                                                           | 255857_at   | -0.6 |
| unknown protein                                                                                                                                                                                                                        | 255869_at   | -0.6 |
| putative protein predicted protein, Arabidopsis thaliana;supported by full-length cDNA: Ceres:10189.                                                                                                                                   | 255808_at   | -0.6 |
| 60S ribosomal protein L6, putative similar to 60S ribosomal protein L6 GI:7208784 from [Cicer arietinum];supported by full-length cDNA: Ceres:573                                                                                      | 255776_at   | -0.6 |
| 3-phosphoserine phosphatase identical to 3-phosphoserine phosphatase GI:3759177 from [Arabidopsis thaliana];supported by full-length cDNA: Ceres:573                                                                                   | 255778_at   | -0.6 |
| hypothetical protein                                                                                                                                                                                                                   | 255643_at   | -0.6 |
| putative DNA-binding protein ; supported by cDNA: gi_15028172_gb_AY045909.1_                                                                                                                                                           | 255568_at   | -0.6 |
| SAR1/GTP-binding secretory factor ;supported by full-length cDNA: Ceres:94610.                                                                                                                                                         | 255505_at   | -0.6 |
| predicted glycosyl transferase similar to IgTC of Neisseria sp., GenBank accession number U14554, similar to IgTC, GenBank accession number U60000                                                                                     | 255506_at   | -0.6 |
| predicted NADH dehydrogenase 24 kD subunit similar to N. crassa NADH-ubiquinone dehydrogenase 24 kD subunit precursor, GenBank accession number U60000                                                                                 | 255442_at   | -0.6 |
| putative phosphatidylglyceroltransferase similar to CDP-diacylglycerol-glycerol-3-phosphate 3-phosphatidyltransferase of Synechocystis sp. GenBank accession number U60000                                                             | 255300_at   | -0.6 |
| 3(2),5-BISPHOSPHATE NUCLEOTIDASE -like protein 3 (2),5-BISPHOSPHATE NUCLEOTIDASE, Arabidopsis thaliana, gb:Q42546;supported by full-length cDNA: Ceres:30158.                                                                          | 255249_at   | -0.6 |
| nucleoside-diphosphate kinase ;supported by full-length cDNA: Ceres:30158.                                                                                                                                                             | 255089_at   | -0.6 |

|                                                                                                                                               |             |      |
|-----------------------------------------------------------------------------------------------------------------------------------------------|-------------|------|
| S18.A ribosomal protein ;supported by full-length cDNA: Ceres:24071.                                                                          | 255000_at   | -0.6 |
| translation initiation factor IF-1, putative similar to translation initiation factor IF-1 GI:124198 from [Spinacia oleracea]                 | 254910_at   | -0.6 |
| putative protein                                                                                                                              | 254694_at   | -0.6 |
| heat shock transcription factor - like protein heat shock transcription factor, Zea mays, PIR2:S61448                                         | 254592_at   | -0.6 |
| ATP binding protein - like nucleotide-binding protein, Homo sapiens, PIR2:JC4010;supported by full-length cDNA: Ceres:13295.                  | 254529_at   | -0.6 |
| putative protein RNPL, Homo sapiens, PIR2:G01859;supported by full-length cDNA: Ceres:251841.                                                 | 254504_at   | -0.6 |
| endomembrane-associated protein ; supported by full-length cDNA: Ceres: 20592.                                                                | 254492_at   | -0.6 |
| putative protein light induced protein homolog, Arabidopsis thaliana, PATCHX:E326816;supported by full-length cDNA: Ceres:35323.              | 254358_at   | -0.6 |
| predicted protein predicted protein ERG25, Saccharomyces cerevisiae, PIR2:S64354                                                              | 254333_at   | -0.6 |
| putative protein hypothetical protein - Caenorhabditis elegans,PID:e1350884;supported by full-length cDNA: Ceres:8254.                        | 254165_at   | -0.6 |
| RNA-binding protein RNP-T precursor ; supported by cDNA: gi_15294253_gb_AF410318.1_AF410318                                                   | 254126_at   | -0.6 |
| geranylgeranylated protein ATGP4 ; supported by cDNA: gi_4097566_gb_U64921.1_ATU64921                                                         | 254106_at   | -0.6 |
| putative protein ClpC protease - Spinacia oleracea,PID:g4105131; supported by full-length cDNA: Ceres: 28122.                                 | 254072_at   | -0.6 |
| putative protein                                                                                                                              | 253927_at   | -0.6 |
| Expressed protein ; supported by full-length cDNA: Ceres: 8827.                                                                               | 253832_at   | -0.6 |
| putative protein ;supported by full-length cDNA: Ceres:8077.                                                                                  | 253562_at   | -0.6 |
| putative protein various predicted proteins                                                                                                   | 253361_at   | -0.6 |
| putative protein ;supported by full-length cDNA: Ceres:31672.                                                                                 | 253304_at   | -0.6 |
| Expressed protein ; supported by full-length cDNA: Ceres: 6401.                                                                               | 253275_at   | -0.6 |
| hypothetical protein ; supported by cDNA: gi_13899098_gb_AF370544.1_AF370544                                                                  | 253283_at   | -0.6 |
| putative protein similarity predicted protein, Synechocystis sp., PIR2:S76285                                                                 | 253251_at   | -0.6 |
| putative protein ; supported by full-length cDNA: Ceres: 18715.                                                                               | 253230_at   | -0.6 |
| putative cyclase associated protein CAP adenylyl cyclase-associated protein CAP2, Rattus norvegicus, PIR2:JC4386; supported by cDNA: gi_316   | 253205_at   | -0.6 |
| Rho1Ps homolog Rac-like protein ; supported by cDNA: gi_1732518_gb_U62746.1_ATU62746                                                          | 253225_at   | -0.6 |
| Expressed protein ; supported by full-length cDNA: Ceres: 1095.                                                                               | 253117_at   | -0.6 |
| H+-transporting ATPase 16K chain P2, vacuolar ;supported by full-length cDNA: Ceres:31833.                                                    | 252926_at   | -0.6 |
| putative protein ;supported by full-length cDNA: Ceres:4740.                                                                                  | 252942_at   | -0.6 |
| ribosomal protein S29 - like ribosomal protein S29, rat, PIR:S30298;supported by full-length cDNA: Ceres:2749.                                | 252693_s_at | -0.6 |
| putative protein predicted proteins, Arabidopsis thaliana                                                                                     | 252683_at   | -0.6 |
| lipoxygenase AtLOX2 ; supported by cDNA: gi_431257_gb_L23968.1_ATHATLO                                                                        | 252618_at   | -0.6 |
| actin depolymerizing factor 1 (ADF1) ;supported by full-length cDNA: Ceres:1907.                                                              | 252564_at   | -0.6 |
| rac GTP binding protein Arac8 ; supported by cDNA: gi_3702965_gb_AF079486.1_AF079486                                                          | 252375_at   | -0.6 |
| putative protein MEL-26, Caenorhabditis elegans, U67737; supported by cDNA: gi_14532781_gb_AY040015.1_                                        | 252367_at   | -0.6 |
| putative protein ; supported by full-length cDNA: Ceres: 40302.                                                                               | 252234_at   | -0.6 |
| 60S RIBOSOMAL PROTEIN - like 60S RIBOSOMAL PROTEIN L26, Brassica rapa, EMBL:BRD495; supported by cDNA: gi_13877790_gb_AF370                   | 252235_at   | -0.6 |
| non-specific lipid transfer protein ;supported by full-length cDNA: Ceres:8400.                                                               | 252115_at   | -0.6 |
| putative heat shock transcription factor heat shock transcription factor HSF30 - Peruvian tomato, PIR2:S25480                                 | 252081_at   | -0.6 |
| ubiquitin extension protein (UBQ1) identical to GI:166929, GI:166930;supported by full-length cDNA: Ceres:18586.                              | 252056_at   | -0.6 |
| zinc finger - like protein zinc finger protein 216, Homo sapiens, EMBL:AF062072; supported by cDNA: gi_14596166_gb_AY042871.1_                | 252009_at   | -0.6 |
| ubiquinol--cytochrome-c reductase-like protein ubiquinol--cytochrome-c reductase, 8K chain, potato, PIR:T07369; supported by cDNA: gi_1545102 | 252012_at   | -0.6 |
| GTPase ATRAB8 ;supported by full-length cDNA: Ceres:27384.                                                                                    | 251960_at   | -0.6 |
| elicitor responsive/phloem -like protein FIERG2 protein, Oryza sativa, PIR:T04363                                                             | 251790_at   | -0.6 |
| putative protein prenylated Rab acceptor 1 - Homo sapiens, EMBL:AJ133534;supported by full-length cDNA: Ceres:11163.                          | 251732_at   | -0.6 |
| hypothetical protein ;supported by full-length cDNA: Ceres:14487.                                                                             | 251624_at   | -0.6 |
| acetylglutamate kinase-like protein acetylglutamate kinase - Synechocystis sp., PIR:S77509;supported by full-length cDNA: Ceres:40830.        | 251639_at   | -0.6 |
| Expressed protein ; supported by full-length cDNA: Ceres: 19033.                                                                              | 251601_at   | -0.6 |
| Expressed protein ; supported by full-length cDNA: Ceres: 22956.                                                                              | 251602_at   | -0.6 |
| U6 snRNA-associated Sm-like protein U6 snRNA-associated Sm-like protein LSM6 - Homo sapiens, EMBL:AF182292; supported by full-length cDI      | 251447_at   | -0.6 |
| putative protein prib5, Ribes nigrum, EMBL:RNI7578                                                                                            | 251418_at   | -0.6 |
| putative protein unknown protein At2g47690 - Arabidopsis thaliana, EMBL:AC005309; supported by full-length cDNA: Ceres: 6853.                 | 251186_at   | -0.6 |
| putative chloroplast inner envelope protein membrane protein, 37K, precursor, chloroplast inner envelope, common tobacco, PIR:T03230;supporte | 251118_at   | -0.6 |
| putative protein serine/threonine protein kinase ATPK10 - Arabidopsis thaliana, EMBL:D30622; supported by cDNA: gi_13249126_gb_AF295669.1     | 251060_at   | -0.6 |
| putative protein ;supported by full-length cDNA: Ceres:17471.                                                                                 | 250969_at   | -0.6 |
| putative protein                                                                                                                              | 250944_at   | -0.6 |
| putative protein proline-rich protein APG, Arabidopsis thaliana, PIR:S21961; supported by full-length cDNA: Ceres: 13022.                     | 250918_at   | -0.6 |
| sulphite reductase ; supported by cDNA: gi_13358216_gb_AF325027.2_AF325027                                                                    | 250846_at   | -0.6 |
| putative protein phosphatase protein tyrosine phosphatase-like protein PTPLB, Mus musculus, EMBL:AF169286                                     | 250428_at   | -0.6 |

|                                                                                                                                                      |           |      |
|------------------------------------------------------------------------------------------------------------------------------------------------------|-----------|------|
| putative protein predicted proteins, Arabidopsis thaliana; supported by full-length cDNA: Ceres: 13625.                                              | 250301_at | -0.6 |
| cystatin (emb CAA03929.1) ; supported by full-length cDNA: Ceres: 5698.                                                                              | 250316_at | -0.6 |
| putative protein various predicted proteins, Arabidopsis thaliana                                                                                    | 250160_at | -0.6 |
| zinc finger-like protein zinc finger protein 1, Arabidopsis thaliana, PIR:T48874                                                                     | 249991_at | -0.6 |
| pectinacetyltransferase                                                                                                                              | 249807_at | -0.6 |
| hypothetical protein ;supported by full-length cDNA: Ceres:17485.                                                                                    | 249472_at | -0.6 |
| putative protein vanilloid receptor gene, CTNS, Homo sapiens, EMBL:AF168787;supported by full-length cDNA: Ceres:18435.                              | 249373_at | -0.6 |
| F-box protein family, AtFBX6 contains similarity to unusual floral organs (UFO) Gl:4376159 from [Arabidopsis thaliana]                               | 249140_at | -0.6 |
| auxin-induced protein AUX2-11 (sp P33077)                                                                                                            | 249109_at | -0.6 |
| putative protein similar to unknown protein (gb AAD10689.1); supported by cDNA: gi_14334449_gb_AY034916.1_                                           | 249065_at | -0.6 |
| unknown protein ; supported by cDNA: gi_13926304_gb_AF372903.1_AF372903                                                                              | 248975_at | -0.6 |
| cytochrome P450                                                                                                                                      | 248964_at | -0.6 |
| 3-oxoacyl-[acyl-carrier-protein] synthase I precursor (beta-ketoacyl-acyl synthase I) (KAS I) (sp P52410) ;supported by full-length cDNA: Ceres:3891 | 248903_at | -0.6 |
| Lil3 protein                                                                                                                                         | 248828_at | -0.6 |
| unknown protein ;supported by full-length cDNA: Ceres:12344.                                                                                         | 248760_at | -0.6 |
| NADH dehydrogenase 10.5K chain-like protein ; supported by full-length cDNA: Ceres: 39633.                                                           | 248746_at | -0.6 |
| putative protein similar to unknown protein (gb AAC72543.1)                                                                                          | 248676_at | -0.6 |
| U6 snRNA-associated Sm-like protein-like                                                                                                             | 248678_at | -0.6 |
| putative protein similar to unknown protein (sp P43335);supported by full-length cDNA: Ceres:8788.                                                   | 248449_at | -0.6 |
| 2-oxoglutarate dehydrogenase E2 subunit ; supported by cDNA: gi_14596218_gb_AY042897.1_                                                              | 248088_at | -0.6 |
| light-inducible protein ATLS1-like ;supported by full-length cDNA: Ceres:1152.                                                                       | 247943_at | -0.6 |
| putative protein predicted protein, Arabidopsis thaliana                                                                                             | 247715_at | -0.6 |
| imidazoleglycerol-phosphate synthase subunit H - like imidazoleglycerol-phosphate synthase subunit H homolog, Archaeoglobus fulgidus, PIR:E69        | 247641_at | -0.6 |
| ring finger protein - like ring finger protein, Cicer arietinum, EMBL:AB026262                                                                       | 247595_at | -0.6 |
| putative protein ; supported by full-length cDNA: Ceres: 7022.                                                                                       | 247572_at | -0.6 |
| glutamate-1-semialdehyde 2,1-aminomutase 1 precursor (GSA 1) (glutamate-1-semialdehyde aminotransferase 1) (GSA-AT 1) (sp P42799)                    | 247392_at | -0.6 |
| unknown protein                                                                                                                                      | 247322_at | -0.6 |
| GTP-binding protein ; supported by full-length cDNA: Ceres: 30437.                                                                                   | 247202_at | -0.6 |
| 14-3-3 protein GF14kappa (grf8) identical to 14-3-3 protein GF14 kappa Gl:5802794, SP:P48348 from [Arabidopsis thaliana];supported by full-length    | 247188_at | -0.6 |
| putative protein similar to unknown protein (emb CAB66916.1);supported by full-length cDNA: Ceres:9323.                                              | 247109_at | -0.6 |
| putative protein similar to unknown protein (pir T05276); supported by cDNA: gi_15292834_gb_AY050851.1_                                              | 247049_at | -0.6 |
| putative protein                                                                                                                                     | 246974_at | -0.6 |
| ribosomal protein S21 - like ribosomal protein S21, Zea mays, PIR:T03945;supported by full-length cDNA: Ceres:93174.                                 | 246747_at | -0.6 |
| putative protein predicted protein, Arabidopsis thaliana;supported by full-length cDNA: Ceres:98046.                                                 | 246593_at | -0.6 |
| seed maturation-like protein seed maturation protein PM23, Glycine max., EMBL:AF116752;supported by full-length cDNA: Ceres:106301.                  | 246547_at | -0.6 |
| putative protein ;supported by full-length cDNA: Ceres:21085.                                                                                        | 246548_at | -0.6 |
| hypothetical protein                                                                                                                                 | 246346_at | -0.6 |
| E2, ubiquitin-conjugating enzyme 17 (UBC17) identical to gi:2801446; supported by full-length cDNA: Ceres:40968.                                     | 246195_at | -0.6 |
| hypothetical protein ; supported by full-length cDNA: Ceres: 38847.                                                                                  | 246074_at | -0.6 |
| succinyl-CoA-ligase alpha subunit ;supported by full-length cDNA: Ceres:10292.                                                                       | 246035_at | -0.6 |
| Expressed protein genomic sequence interrupted by a stop codon in exon 4, resequencing necessary to remove ambiguity; otherwise supported by         | 246030_at | -0.6 |
| putative protein predicted proteins - Arabidopsis thaliana;supported by full-length cDNA: Ceres:2537.                                                | 245984_at | -0.6 |
| putative protein ;supported by full-length cDNA: Ceres:42742.                                                                                        | 245906_at | -0.6 |
| unknown protein                                                                                                                                      | 245877_at | -0.6 |
| amino acid permease, putative almost identical to amino acid permease Gl:608673 from [Arabidopsis thaliana]                                          | 245740_at | -0.6 |
| unknown protein                                                                                                                                      | 245660_at | -0.6 |
| Expressed protein ; supported by full-length cDNA: Ceres: 12256.                                                                                     | 245367_at | -0.6 |
| elicitor like protein ; supported by full-length cDNA: Ceres: 1718.                                                                                  | 245340_at | -0.6 |
| Expressed protein ; supported by full-length cDNA: Ceres: 7632.                                                                                      | 245338_at | -0.6 |
| ankyrin like protein ; supported by cDNA: gi_16604604_gb_AY059747.1_                                                                                 | 245274_at | -0.6 |
| F12A21.13 putative photosystem II Core Complex sp 049347 PSBY_ARATH; similar to ESTs gb BE523181, dbj AV531372.1, dbj AV527826.1, db                 | 245195_at | -0.6 |
| RING finger-like protein similarity to predicted protein, Arabidopsis thaliana, AF361602-Contains Zinc finger, C3HC4 type (RING finger), signature   | 245207_at | -0.6 |
| putative Ca2+-ATPase ; supported by cDNA: gi_11493642_gb_AF200739.1_AF200739                                                                         | 245117_at | -0.6 |
| putative integral membrane protein ;supported by full-length cDNA: Ceres:25204.                                                                      | 245083_at | -0.6 |
| ribosomal protein S16                                                                                                                                | 245049_at | -0.6 |
| large subunit of riblose-1,5-bisphosphate carboxylase/oxygenase                                                                                      | 245015_at | -0.6 |
| cytochrome f                                                                                                                                         | 245020_at | -0.6 |



|                                                                                                                                                   |             |      |
|---------------------------------------------------------------------------------------------------------------------------------------------------|-------------|------|
| hypothetical protein                                                                                                                              | 244993_s_at | -0.6 |
| putative RSZp22 splicing factor                                                                                                                   | 257435_at   | -0.6 |
| DNA-3-methyladenine glycosidase, putative similar to DNA-3-methyladenine glycosidase GB:CAB60736 GI:6434028 from [Staphylococcus aureus           | 257474_at   | -0.6 |
| hypothetical protein predicted by genemark.hmm, contains Pfam profile:PF00320 GATA:GATA zinc finger                                               | 257571_at   | -0.6 |
| hypothetical protein                                                                                                                              | 257583_at   | -0.6 |
| hypothetical protein ; supported by full-length cDNA: Ceres: 26019.                                                                               | 245317_at   | -0.6 |
| unknown protein ; supported by cDNA: gi_15810460_gb_AY056269.1_                                                                                   | 260501_at   | -0.6 |
| Expressed protein ; supported by cDNA: gi_16612239_gb_AF439821.1_AF439821                                                                         | 253973_at   | -0.6 |
| putative protein unknown protein T12H1.25 - Arabidopsis thaliana, EMBL:AC009177                                                                   | 246772_at   | -0.6 |
| ras-related small GTP-binding protein RAB1c ; supported by cDNA: gi_15529160_gb_AY052204.1_                                                       | 245299_at   | -0.6 |
| mitochondrial F1-ATPase, gamma subunit (ATP3_ARATH) ;supported by full-length cDNA: Ceres:26812.                                                  | 267600_at   | -0.5 |
| putative receptor-like protein kinase ; supported by cDNA: gi_15292872_gb_AY050870.1_                                                             | 267619_at   | -0.5 |
| 30S ribosomal protein S5 ; supported by full-length cDNA: Ceres: 38063.                                                                           | 267435_at   | -0.5 |
| putative heme A:farnesyltransferase ; supported by cDNA: gi_15028298_gb_AY045952.1_                                                               | 267342_at   | -0.5 |
| unknown protein                                                                                                                                   | 267310_at   | -0.5 |
| putative mitochondrial carrier protein ;supported by full-length cDNA: Ceres:150522.                                                              | 267274_at   | -0.5 |
| 6,7-dimethyl-8-ribityllumazine synthase precursor ; supported by cDNA: gi_15292958_gb_AY050913.1_                                                 | 267188_at   | -0.5 |
| unknown protein ;supported by full-length cDNA: Ceres:150205.                                                                                     | 266949_s_at | -0.5 |
| putative ABC transporter related to multi drug resistance proteins and P-glycoproteins                                                            | 266856_at   | -0.5 |
| putative RAV-like B3 domain DNA binding protein                                                                                                   | 266760_at   | -0.5 |
| glycine decarboxylase complex H-protein identical to GB:U27144;supported by full-length cDNA: Ceres:24194.                                        | 266636_at   | -0.5 |
| similar to gibberellin-regulated proteins                                                                                                         | 266613_at   | -0.5 |
| 50S ribosomal protein L27 ;supported by full-length cDNA: Ceres:17067.                                                                            | 266535_s_at | -0.5 |
| unknown protein ; supported by cDNA: gi_13605586_gb_AF361619.1_AF361619                                                                           | 266551_at   | -0.5 |
| unknown protein                                                                                                                                   | 266352_at   | -0.5 |
| putative RGA1, gibberellin response modulation protein identical to GB:Y11336, member of SCARECROW family; supported by cDNA: gi_15529222         | 266331_at   | -0.5 |
| putative tropinone reductase ; supported by cDNA: gi_14334839_gb_AY035093.1_                                                                      | 266265_at   | -0.5 |
| putative protease inhibitor ;supported by full-length cDNA: Ceres:11662.                                                                          | 266168_at   | -0.5 |
| putative CCAAT-binding transcription factor subunit identical to GB:Y13723; contains a CBF/NF-Y subunit signature (PDOC00578) present in mem      | 266171_at   | -0.5 |
| unknown protein                                                                                                                                   | 266075_s_at | -0.5 |
| hypothetical protein predicted by genefinder; supported by cDNA: gi_13877832_gb_AF370179.1_AF370179                                               | 266001_at   | -0.5 |
| putative cleavage and polyadenylation specificity factor                                                                                          | 265888_at   | -0.5 |
| putative aldolase ;supported by full-length cDNA: Ceres:22418.                                                                                    | 265735_at   | -0.5 |
| hypothetical protein predicted by genscan                                                                                                         | 265698_at   | -0.5 |
| putative myosin heavy chain ; supported by cDNA: gi_15982766_gb_AY057490.1_                                                                       | 265679_at   | -0.5 |
| hypothetical protein similar to hypothetical protein GB:AAD18138; supported by full-length cDNA: Ceres: 23166.                                    | 265547_at   | -0.5 |
| putative RING-H2 zinc finger protein ;supported by full-length cDNA: Ceres:7201.                                                                  | 265472_at   | -0.5 |
| unknown protein                                                                                                                                   | 265427_at   | -0.5 |
| unknown protein ;supported by full-length cDNA: Ceres:34875.                                                                                      | 265415_at   | -0.5 |
| unknown protein ;supported by full-length cDNA: Ceres:108956.                                                                                     | 265384_at   | -0.5 |
| cytosolic cyclophilin (ROC3) ;supported by full-length cDNA: Ceres:23995.                                                                         | 265352_at   | -0.5 |
| unknown protein weak similarity to C3HC4 zinc finger;supported by full-length cDNA: Ceres:156298.                                                 | 265023_at   | -0.5 |
| zinc finger protein 7, ZFP7 ; supported by cDNA: gi_790684_gb_L39650.1_ATHZFPG                                                                    | 265029_at   | -0.5 |
| putative auxin transport protein strongly similar to auxin transport protein GB:AAD52697; supported by cDNA: gi_15450508_gb_AY052356.1_           | 264900_at   | -0.5 |
| putative coproporphyrinogen III oxidase similar to GB:S39523 and ESTs gb AA586260 and dbj D48620; supported by cDNA: gi_14624991_dbj_AB           | 264820_at   | -0.5 |
| unknown protein similar to EST gb H37293;supported by full-length cDNA: Ceres:7188.                                                               | 264808_at   | -0.5 |
| unknown protein similar to ESTs gb T42386, gb H36247, gb N38423, gb T21830, and gb AA585725; supported by cDNA: gi_14423427_gb_AF386              | 264445_at   | -0.5 |
| aminomethyltransferase-like precursor protein very strong similarity to aminomethyltransferase precursor gb U9769 from Mesembryanthemum cry       | 264394_at   | -0.5 |
| putative vesicle transport protein Contains similarity to vesicle trafficking protein gb U91538 from Mus musculus. ESTs gb F15494 and gb F14097 c | 264373_at   | -0.5 |
| pantothenate kinase, putative similar to pantothenate kinase GI:4191500 from [Aspergillus nidulans]                                               | 264244_at   | -0.5 |
| latex-abundant protein, putative similar to latex-abundant protein GI:4235430 from (Hevea brasiliensis)                                           | 264178_at   | -0.5 |
| Expressed protein ; supported by full-length cDNA: Ceres: 20090.                                                                                  | 264023_at   | -0.5 |
| putative phosphoprotein phosphatase ; supported by cDNA: gi_16930440_gb_AF419574.1_AF419574                                                       | 263990_at   | -0.5 |
| unknown protein ;supported by full-length cDNA: Ceres:39503.                                                                                      | 263952_s_at | -0.5 |
| putative WRKY-type DNA binding protein ; supported by cDNA: gi_15991743_gb_AF425836.1_AF425836                                                    | 263797_at   | -0.5 |
| putative vanadate resistance protein                                                                                                              | 263722_at   | -0.5 |
| ribonuclease, RNS3 identical to ribonuclease SP:P42815, GI:562000 from [Arabidopsis thaliana];supported by full-length cDNA: Ceres:9623.          | 263689_at   | -0.5 |

|                                                                                                                                                       |             |      |
|-------------------------------------------------------------------------------------------------------------------------------------------------------|-------------|------|
| putative protein transport protein SEC23 similar to human SEC23                                                                                       | 263542_at   | -0.5 |
| putative histone H2B ;supported by full-length cDNA: Ceres:14965.                                                                                     | 263412_at   | -0.5 |
| putative beta-1,4-N-acetylglucosaminyltransferase contains similarity to gj4417304 F15O11.7 putative beta-1,4-mannosyl-glycoprotein beta-1,4-N-       | 262768_at   | -0.5 |
| multicatalytic endopeptidase identical to GB:CAA73619, ESTs gb H36972, gb T22551 and gb T13800 come from this gene;supported by full-length           | 262716_at   | -0.5 |
| unknown protein ESTs gb T22508, gb H36196 and gb AI100134 come from this gene                                                                         | 262581_at   | -0.5 |
| unknown protein similar to hypothetical protein GB:AAF24587 GI:6692122 from [Arabidopsis thaliana]; supported by cDNA: gi_16604307_gb_AY05            | 262559_at   | -0.5 |
| unknown protein EST gb AA586241 comes from this gene                                                                                                  | 262488_at   | -0.5 |
| hypothetical protein contains similarity to hedgehog-interacting protein GI:4868122 from [Mus musculus]                                               | 262215_at   | -0.5 |
| glutamate decarboxylase (gad), putative similar to glutamate decarboxylase (gad) GI:294111 from [Petunia hybrida]; supported by cDNA: gi_11849        | 261970_at   | -0.5 |
| salt-tolerance zinc finger protein identical to salt-tolerance zinc finger protein GB:CAA64820 GI:1565227 from [Arabidopsis thaliana]; supported by c | 261648_at   | -0.5 |
| unknown protein                                                                                                                                       | 261572_at   | -0.5 |
| acidic ribosomal protein, putative similar to 60S ACIDIC RIBOSOMAL PROTEIN P1 GB:O23095 from [Arabidopsis thaliana];supported by full-lengt           | 261578_at   | -0.5 |
| hypothetical protein predicted by genemark.hmm                                                                                                        | 261525_at   | -0.5 |
| tumor suppressor, putative similar to tumor suppressor GI:575354 from [Oryza sativa]; supported by cDNA: gi_14190448_gb_AF378902.1_AF3789             | 261490_at   | -0.5 |
| unknown protein ; supported by cDNA: gi_16604598_gb_AY059744.1_                                                                                       | 261445_at   | -0.5 |
| RAC-like GTP-binding protein ARAC4 identical to SP:Q38919 from [Arabidopsis thaliana]; supported by cDNA: gi_1304416_gb_U45236.1_ATU452               | 261229_at   | -0.5 |
| hypothetical protein contains similarity to mitochondrial inner membrane protease subunit 1 GB:P28627 from [Saccharomyces cerevisiae]                 | 260972_at   | -0.5 |
| unknown protein ; supported by full-length cDNA: Ceres: 11793.                                                                                        | 260767_s_at | -0.5 |
| glycine cleavage system H protein precursor, putative similar to GB:Z37524 from [Flaveria anomala];supported by full-length cDNA: Ceres:23118.        | 260704_at   | -0.5 |
| cellulose synthase catalytic subunit, putative similar to GB:AAD39534 from [Gossypium hirsutum]                                                       | 260592_at   | -0.5 |
| unknown protein ; supported by full-length cDNA: Ceres: 10531.                                                                                        | 260200_at   | -0.5 |
| fructokinase, putative similar to fructokinase (Lycopersicon esculentum) GI:2102691; supported by cDNA: gi_13878132_gb_AF370329.1_AF37032             | 260107_at   | -0.5 |
| putative transcription factor BTF3 (RNA polymerase B transcription factor 3) similar to transcription factor BTF3 (RNA polymerase B transcription fa  | 260095_at   | -0.5 |
| putative RING zinc finger protein contains Pfam profile: PF00097 Zinc finger, C3HC4 type (RING finger); supported by full-length cDNA: Ceres: 274     | 259982_at   | -0.5 |
| inner mitochondrial membrane protein identical to inner mitochondrial membrane protein GB:U18126 [Arabidopsis thaliana];supported by full-length      | 259890_at   | -0.5 |
| expressed protein supported by cDNA: Ceres:42692                                                                                                      | 259768_at   | -0.5 |
| glyceraldehyde-3-phosphate dehydrogenase identical to glyceraldehyde-3-phosphate dehydrogenase GI:166708 [Arabidopsis thaliana] (Gene 104,            | 259625_at   | -0.5 |
| bZIP transcription factor, putative contains Pfam profile: PF00170: bZIP transcription factor; supported by cDNA: gi_15028322_gb_AY045964.1_          | 259626_at   | -0.5 |
| hypothetical protein predicted using genefinder;supported by full-length cDNA: Ceres:20442.                                                           | 259340_at   | -0.5 |
| unknown protein similar to MICROSOMAL SIGNAL PEPTIDASE GB:P28687 from [Gallus gallus];supported by full-length cDNA: Ceres:15144.                     | 259307_at   | -0.5 |
| calmodulin-like protein similar to calmodulin GB:AAA34015 [Glycine max], Pfam HMM hit: EF hand                                                        | 259143_at   | -0.5 |
| putative ribosomal protein s19 or s24 similar to ribosomal protein S19 GB:445612 [Solanum tuberosum] and similar to ribosomal protein S24 GB:45       | 259090_at   | -0.5 |
| unknown protein similar to GB:AAD49104 [Arabidopsis thaliana];supported by full-length cDNA: Ceres:38917.                                             | 259097_at   | -0.5 |
| putative 60S acidic ribosomal protein P0 similar to putative 60S acidic ribosomal protein P0 GB:P50346 [Glycine max];supported by full-length cDN     | 259006_at   | -0.5 |
| unknown protein ; supported by full-length cDNA: Ceres: 35785.                                                                                        | 258846_at   | -0.5 |
| putative short-chain type dehydrogenase/reductase similar to short-chain type dehydrogenase/reductase GB:Q08632 [Picea abies]; supported by cl        | 258814_at   | -0.5 |
| unknown protein similar to putative protein GB:BAA84809 from [Oryza sativa]                                                                           | 258706_at   | -0.5 |
| unknown protein                                                                                                                                       | 258691_at   | -0.5 |
| unknown protein similar to pop3 peptide GB:AAC26526 from [Populus balsamifera subsp. trichocarpa X Populus deltoides];supported by full-length        | 258412_at   | -0.5 |
| subtilisin-like serine protease contains similarity to SBT1 GI:1771160 from [Lycopersicon esculentum];supported by full-length cDNA: Ceres:106539     | 258368_at   | -0.5 |
| unknown protein ; supported by full-length cDNA: Ceres: 11852.                                                                                        | 258194_at   | -0.5 |
| unknown protein ; supported by cDNA: gi_13384113_gb_AF337954.1_AF337954                                                                               | 258107_at   | -0.5 |
| unknown protein similar to NA-DAMAGE-REPAIR/TOLERATION PROTEIN DRT100 PRECURSOR GB:Q00874 from [Arabidopsis thaliana]                                 | 257974_at   | -0.5 |
| unknown protein                                                                                                                                       | 257996_at   | -0.5 |
| hypothetical protein contains similarity to 3-hydroxyisobutyrate dehydrogenase GB:AAC06408 from [Aquifex aeolicus]; supported by cDNA: gi_1514        | 257911_at   | -0.5 |
| translational inhibitor protein, putative similar to GB:NP_005827 from [Homo sapiens], contains Pfam profile: PF01042 Domain of unknown function      | 257674_at   | -0.5 |
| ethylene responsive element binding factor, putative similar to GB:BAA32420 from [Arabidopsis thaliana], contains Pfam profile: PF00847 P2 dome       | 257675_at   | -0.5 |
| unknown protein ;supported by full-length cDNA: Ceres:17362.                                                                                          | 257676_at   | -0.5 |
| unknown protein                                                                                                                                       | 257615_at   | -0.5 |
| cytochrome c, putative similar to cytochrome c1 GB:S66866 from [Solanum tuberosum];supported by full-length cDNA: Ceres:41320.                        | 257148_at   | -0.5 |
| unknown protein contains Pfam profile: PF00097 Zinc finger, C3HC4 type (RING finger)                                                                  | 256917_at   | -0.5 |
| NAD dependent epimerase, putative contains Pfam profile: PF01370 NAD dependent epimerase/dehydratase family; supported by cDNA: gi_1387               | 256865_at   | -0.5 |
| putative protein similar to ATP synthase D chain (mitochondrial) SP:O75947 [Homo sapiens (Human)]; supported by full-length cDNA: Ceres: 2768         | 256679_at   | -0.5 |
| disease resistance protein, putative similar to disease resistance protein GB:AAC78591 GI:3894383 [Lycopersicon esculentum]                           | 256620_at   | -0.5 |
| amino acid permease, putative contains Pfam profile: PF00324 amino acid permease                                                                      | 256567_at   | -0.5 |
| unknown protein ;supported by full-length cDNA: Ceres:99625.                                                                                          | 256525_at   | -0.5 |
| 60S ribosomal protein L10, putative contains Pfam profile: PF00826: Ribosomal L10;supported by full-length cDNA: Ceres:35307.                         | 256385_at   | -0.5 |

|                                                                                                                                                          |             |      |
|----------------------------------------------------------------------------------------------------------------------------------------------------------|-------------|------|
| hypothetical protein                                                                                                                                     | 256373_at   | -0.5 |
| unknown protein                                                                                                                                          | 256286_at   | -0.5 |
| unknown protein ; supported by full-length cDNA: Ceres: 9180.                                                                                            | 256256_at   | -0.5 |
| dof zinc finger protein identical to dof zinc finger protein [Arabidopsis thaliana] GI:3608261; supported by cDNA: gi_3608260_dbj_AB017564.1_AB0         | 256185_at   | -0.5 |
| unknown protein contains Pfam profile: PF00254 FKBP-type peptidyl-prolyl cis-trans isomerases;supported by full-length cDNA: Ceres:42062.                | 256130_at   | -0.5 |
| hypothetical protein predicted by genemark.hmm                                                                                                           | 256086_at   | -0.5 |
| PSI type II chlorophyll a/b-binding protein, putative similar to PSI type II chlorophyll a/b-binding protein GI:541565 from [Arabidopsis thaliana];suppr | 256015_at   | -0.5 |
| protein phosphatase type 2C, putative similar to protein phosphatase type 2C GI:4336436 from [Lotus japonicus];supported by full-length cDNA: Cere       | 255967_at   | -0.5 |
| putative chloroplast 50S ribosomal protein L28 ;supported by full-length cDNA: Ceres:31633.                                                              | 255850_at   | -0.5 |
| transmembrane protein, putative similar to transmembrane protein GI:535681 from [Mus musculus];supported by full-length cDNA: Ceres:40780.               | 255735_at   | -0.5 |
| putative nucleotide sugar epimerase                                                                                                                      | 255696_at   | -0.5 |
| putative ribosomal protein S13 similar to ribosomal protein S13 (Pfam);supported by full-length cDNA: Ceres:4058.                                        | 255706_at   | -0.5 |
| hypothetical protein                                                                                                                                     | 255691_at   | -0.5 |
| P II nitrogen sensing protein GLB I ; supported by cDNA: gi_3885942_gb_AF095455.1_AF095455                                                               | 255558_at   | -0.5 |
| putative glucan synthase component similar to 1,3-beta glucan synthase                                                                                   | 255378_at   | -0.5 |
| putative arginase similar to arginases (Pfam: PF00491, Score=353.2, E=1.4e-119, N=1);supported by full-length cDNA: Ceres:33985.                         | 255065_s_at | -0.5 |
| putative protein hypothetical protein F6E13.15 - Arabidopsis thaliana,PIR2:T00682                                                                        | 255041_at   | -0.5 |
| hydroxymethylglutaryl-CoA synthase ;supported by full-length cDNA: Ceres:22413.                                                                          | 254845_at   | -0.5 |
| putative protein                                                                                                                                         | 254794_at   | -0.5 |
| putative protein predicted protein, Arabidopsis thaliana, PATCHX:E327449                                                                                 | 254701_at   | -0.5 |
| putative protein ;supported by full-length cDNA: Ceres:29133.                                                                                            | 254462_at   | -0.5 |
| putative protein gamma-SNAP protein, bovine, PIR2:S32369;supported by full-length cDNA: Ceres:267158.                                                    | 254476_at   | -0.5 |
| fatty acid hydroxylase - like protein fatty acid hydroxylase Fah1p, Arabidopsis thaliana, PID:g2736147; supported by cDNA: gi_14994242_gb_AY04           | 254448_at   | -0.5 |
| putative protein Human mRNA for KIAA0050 gene, PATCHX:D1006988;supported by full-length cDNA: Ceres:6665.                                                | 254428_at   | -0.5 |
| G10 - like protein Maternal G10 like protein, Oryza sativa, PATCHX:D1002643; supported by cDNA: gi_15294271_gb_AF410327.1_AF410327                       | 254399_at   | -0.5 |
| Ribosomal protein L7Ae - like NHP2/RS6 FAMILY PROTEIN, Homo sapiens, PID:g4826860                                                                        | 254355_at   | -0.5 |
| dihydroorotase ; supported by cDNA: gi_2121272_gb_AF000146.1_ATAF000146                                                                                  | 254267_at   | -0.5 |
| putative protein                                                                                                                                         | 254117_at   | -0.5 |
| putative protein ; supported by full-length cDNA: Ceres: 10313.                                                                                          | 253918_at   | -0.5 |
| putative zinc finger protein zinc finger protein SINA1p - Vitis vinifera,PID:e1423803                                                                    | 253838_at   | -0.5 |
| putative protein ;supported by full-length cDNA: Ceres:1968.                                                                                             | 253766_at   | -0.5 |
| rac GTP binding protein Arac7 ; supported by cDNA: gi_3702961_gb_AF079484.1_AF079484                                                                     | 253757_at   | -0.5 |
| profilin 2 ; supported by full-length cDNA: Ceres: 25886.                                                                                                | 253727_at   | -0.5 |
| putative protein predicted protein, Arabidopsis thaliana, PIR2:T01282;supported by full-length cDNA: Ceres:32381.                                        | 253644_at   | -0.5 |
| putative protein ; supported by full-length cDNA: Ceres: 37881.                                                                                          | 253464_at   | -0.5 |
| caffeoyl-CoA O-methyltransferase - like protein caffeoyl-CoA 3-O-methyltransferase, Populus tremuloides, PID:G857578;supported by full-length cl         | 253276_at   | -0.5 |
| putative protein hypothetical protein, Arabidopsis thaliana, PATCHX:E353194; supported by cDNA: gi_13430837_gb_AF360331.1_AF360331                       | 253282_at   | -0.5 |
| putative protein various predicted proteins; supported by full-length cDNA: Ceres: 17912.                                                                | 253233_at   | -0.5 |
| Expressed protein ; supported by full-length cDNA: Ceres: 8360.                                                                                          | 253119_at   | -0.5 |
| putative protein aminoacylase I - Sus scrofa,PID:g1845                                                                                                   | 253033_at   | -0.5 |
| Histone deacetylase ; supported by cDNA: gi_11066138_gb_AF195547.1_AF195547                                                                              | 252982_at   | -0.5 |
| hypothetical protein ;supported by full-length cDNA: Ceres:249631.                                                                                       | 252995_at   | -0.5 |
| Phospholipase like protein Arabidopsis thaliana pEARLI 4 mRNA, PID:g871782                                                                               | 252976_s_at | -0.5 |
| multiubiquitin chain binding protein (MBP1) ;supported by full-length cDNA: Ceres:6757.                                                                  | 252955_at   | -0.5 |
| Histon H3 ;supported by full-length cDNA: Ceres:2670.                                                                                                    | 252849_at   | -0.5 |
| hypothetical protein ;supported by full-length cDNA: Ceres:123060.                                                                                       | 252852_at   | -0.5 |
| histone H3.3 ; supported by cDNA: gi_14326561_gb_AF385735.1_AF385735                                                                                     | 252824_at   | -0.5 |
| hypothetical protein ; supported by full-length cDNA: Ceres: 207539.                                                                                     | 252789_s_at | -0.5 |
| putative protein several hypothetical proteins - Arabidopsis thaliana; supported by cDNA: gi_15724293_gb_AF412087.1_AF412087                             | 252619_at   | -0.5 |
| putative protein senescence-associated protein 5 (SA5) - Hemerocallis hybrid cultivar, EMBL:AF082030; supported by full-length cDNA: Ceres: 11           | 252591_at   | -0.5 |
| putative protein ferrityochelin binding protein - Methanobacterium thermoautotrophicum, EMBL:AE000918.1; supported by cDNA: gi_15293166_gt               | 252326_at   | -0.5 |
| 4-coumarate-CoA ligase -like protein 4-coumarate-CoA ligase enzyme, Pinus taeda, gb:AAA92669;supported by full-length cDNA: Ceres:41541.                 | 252293_at   | -0.5 |
| RNA-binding - like protein RNA-binding protein RBP37, Arabidopsis thaliana, PIR:T04196                                                                   | 252313_at   | -0.5 |
| Expressed protein ; supported by full-length cDNA: Ceres: 26994.                                                                                         | 252181_at   | -0.5 |
| steroid 22-alpha-hydroxylase (DWF4) ; supported by cDNA: gi_15724347_gb_AF412114.1_AF412114                                                              | 252184_at   | -0.5 |
| putative protein hypothetical protein T19L18.12 - Arabidopsis thaliana, PIR:T02616;supported by full-length cDNA: Ceres:32231.                           | 252125_at   | -0.5 |
| hypothetical protein YIP1 protein, Saccharomyces cerevisiae, PIR:S64486                                                                                  | 252002_at   | -0.5 |

|                                                                                                                                                    |             |      |
|----------------------------------------------------------------------------------------------------------------------------------------------------|-------------|------|
| putative protein CHLOROPLAST 30S RIBOSOMAL PROTEIN S20, SWISSPROT:RR20_GUITH; supported by cDNA: gi_15810456_gb_AY05626;                           | 251744_at   | -0.5 |
| protein kinase C inhibitor-like protein protein kinase C inhibitor - Zea mays, PIR:S45368; supported by full-length cDNA: Ceres: 28847.            | 251707_at   | -0.5 |
| Expressed protein ; supported by full-length cDNA: Ceres: 255818.                                                                                  | 251660_at   | -0.5 |
| pectinesterase precursor-like protein pectinesterase (EC 3.1.1.11) precursor - Pisum sativum, PIR:T06468; supported by cDNA: gi_16974624_gb_       | 251509_at   | -0.5 |
| putative protein unknown protein At2g44130 - Arabidopsis thaliana, EMBL:AC004005;supported by full-length cDNA: Ceres:8014.                        | 251443_at   | -0.5 |
| URIDYLATE KINASE-like protein URIDYLATE KINASE - Arabidopsis thaliana, EMBL:AF000147;supported by full-length cDNA: Ceres:16800.                   | 251426_at   | -0.5 |
| scarecrow - like protein scarecrow-like 6, Arabidopsis thaliana, EMBL:AF036303                                                                     | 251376_at   | -0.5 |
| peptidylprolyl isomerase ROC4 ;supported by full-length cDNA: Ceres:29220.                                                                         | 251305_at   | -0.5 |
| putative protein ER6 protein - Lycopersicon esculentum, EMBL:AF096262; supported by cDNA: gi_14334945_gb_AY035146.1_                               | 251221_at   | -0.5 |
| hypothetical protein ;supported by full-length cDNA: Ceres:20232.                                                                                  | 251210_at   | -0.5 |
| lectin - like protein lectin precursor LECSJAbmII, Sophora japonica, EMBL:SJU63012;supported by full-length cDNA: Ceres:41306.                     | 251140_at   | -0.5 |
| 40S ribosomal protein S17 -like 40S ribosomal protein S17, Lycopersicon esculentum, EMBL:AF161704;supported by full-length cDNA: Ceres:390         | 250862_s_at | -0.5 |
| lysine decarboxylase-like protein                                                                                                                  | 250723_at   | -0.5 |
| putative protein similar to unknown protein (gb)AAD38624.1)                                                                                        | 250586_at   | -0.5 |
| putative protein similar to unknown protein (emb)CAB61744.1); supported by full-length cDNA: Ceres: 12613.                                         | 250511_at   | -0.5 |
| histon H3 protein HISTONE H3.2, MINOR, Medicago sativa, SWISSPROT:H32_MEDSA                                                                        | 250397_at   | -0.5 |
| enhancer of rudimentary ; supported by cDNA: gi_1595811_gb_U67398.1_ATU67398                                                                       | 250406_at   | -0.5 |
| HY5(bZIP transcription factor family) identical to HY5 protein GI:2251084 from [Arabidopsis thaliana]                                              | 250420_at   | -0.5 |
| putative potassium transport protein glutathione-regulated potassium-efflux system protein KEFB, Escherichia coli, SWISSPROT:P45522                | 250329_at   | -0.5 |
| unknown protein                                                                                                                                    | 250247_at   | -0.5 |
| ribosomal protein precursor - like ribosomal protein S13 precursor, chloroplast Arabidopsis thaliana, PIR:S59594; supported by cDNA: gi_14517391   | 250190_at   | -0.5 |
| biotin carboxyl carrier protein of acetyl-CoA carboxylase precursor (BCCP) (sp)Q42533);supported by full-length cDNA: Ceres:38996.                 | 250125_at   | -0.5 |
| thioredoxin f2 (gb)AAD35004.1) ; supported by cDNA: gi_4973253_gb_AF144386.1_AF144386                                                              | 250133_at   | -0.5 |
| putative protein PGPD14 - Petunia x hybrida, EMBL:AF049930                                                                                         | 250000_at   | -0.5 |
| putative protein predicted proteins, Arabidopsis thaliana                                                                                          | 249968_at   | -0.5 |
| chorismate mutase/prephenate dehydratase-like protein ; supported by cDNA: gi_16604397_gb_AY058097.1_                                              | 249910_at   | -0.5 |
| c-myc binding protein MM-1-like protein ; supported by full-length cDNA: Ceres: 28832.                                                             | 249829_at   | -0.5 |
| unknown protein ;supported by full-length cDNA: Ceres:29189.                                                                                       | 249838_at   | -0.5 |
| unknown protein                                                                                                                                    | 249776_at   | -0.5 |
| putative protein contains similarity to translation initiation factor; supported by full-length cDNA: Ceres: 11304.                                | 249711_at   | -0.5 |
| eIF4Eiso protein (emb)CAA71579.1) ;supported by full-length cDNA: Ceres:23770.                                                                     | 249712_at   | -0.5 |
| pyridoxal kinase -like protein pyridoxal kinase, Sus scofra, EMBL:AF041255;supported by full-length cDNA: Ceres:107973.                            | 249589_at   | -0.5 |
| putative protein MtN24 gene, Medicago truncatula, EMBL:MTY15290                                                                                    | 249400_at   | -0.5 |
| 6-phosphogluconate dehydrogenase ;supported by full-length cDNA: Ceres:109329.                                                                     | 249266_at   | -0.5 |
| allene oxide synthase (emb CAA73184.1) ; supported by cDNA: gi_6002956_gb_AF172727.1_AF172727                                                      | 249208_at   | -0.5 |
| N-hydroxycinnamoyl benzoyltransferase-like protein                                                                                                 | 249188_at   | -0.5 |
| putative protein similar to unknown protein (gb)AAD38250.1)                                                                                        | 248972_at   | -0.5 |
| urea active transporter-like protein                                                                                                               | 248970_at   | -0.5 |
| 50S ribosomal protein L14                                                                                                                          | 248878_at   | -0.5 |
| putative protein strong similarity to unknown protein (gb)AAF02142.1);supported by full-length cDNA: Ceres:7891.                                   | 248663_at   | -0.5 |
| cyclin C-like protein ;supported by full-length cDNA: Ceres:2036.                                                                                  | 248666_at   | -0.5 |
| unknown protein ;supported by full-length cDNA: Ceres:205928.                                                                                      | 248679_at   | -0.5 |
| ribitol dehydrogenase-like ; supported by cDNA: gi_15146201_gb_AY049242.1_                                                                         | 248539_at   | -0.5 |
| putative protein strong similarity to unknown protein (gb)AAB68038.1);supported by full-length cDNA: Ceres:17208.                                  | 248433_at   | -0.5 |
| unknown protein ;supported by full-length cDNA: Ceres:20287.                                                                                       | 248421_at   | -0.5 |
| unknown protein ; supported by cDNA: gi_15809965_gb_AY054251.1_                                                                                    | 248288_at   | -0.5 |
| proline-rich cell wall protein-like ;supported by full-length cDNA: Ceres:110653.                                                                  | 248259_at   | -0.5 |
| putative protein similar to unknown protein (gb)AAF34833.1)                                                                                        | 248238_at   | -0.5 |
| Expressed protein ; supported by full-length cDNA: Ceres: 39314.                                                                                   | 247899_at   | -0.5 |
| similar to unknown protein (sp)P72777)                                                                                                             | 247862_at   | -0.5 |
| putative protein predicted protein, Arabidopsis thaliana;supported by full-length cDNA: Ceres:148815.                                              | 247716_at   | -0.5 |
| GTP-binding protein ara-3 GTP-binding protein ara-3, Arabidopsis thaliana, PIR:JS0640                                                              | 247699_at   | -0.5 |
| actin depolymerizing factor 3 - like protein actin depolymerizing factor 3, Arabidopsis thaliana, EMBL:AF102821;supported by full-length cDNA: Cer | 247658_at   | -0.5 |
| putative protein predicted protein, Synechocystis sp.;supported by full-length cDNA: Ceres:25855.                                                  | 247583_at   | -0.5 |
| putative protein various predicted proteins, Arabidopsis thaliana                                                                                  | 247563_at   | -0.5 |
| expressed protein similar to unknown protein (gb)AAF03448.1); supported by full-length cDNA: Ceres: 97900.                                         | 247258_at   | -0.5 |
| unknown protein ; supported by cDNA: gi_13877834_gb_AF370180.1_AF370180                                                                            | 247177_at   | -0.5 |

|                                                                                                                                                       |           |      |
|-------------------------------------------------------------------------------------------------------------------------------------------------------|-----------|------|
| putative protein cation transport protein chaC, Escherichia coli, PIR:G64868                                                                          | 246884_at | -0.5 |
| sugar transporter-like protein putative sugar transporter - Prunus armeniaca, EMBL:AF000952; supported by cDNA: gi_16648752_gb_AY058152.1             | 246508_at | -0.5 |
| calmodulin-3 ;supported by full-length cDNA: Ceres:16715.                                                                                             | 246290_at | -0.5 |
| putative protein karyopherin beta 3 - Homo sapiens, EMBL:U72761; supported by cDNA: gi_14334741_gb_AY035044.1_                                        | 245941_at | -0.5 |
| putative protein NAC1 - Medicago truncatula, EMBL:AF254124                                                                                            | 245934_at | -0.5 |
| ribosomal protein S15-like ribosomal protein S15 - Arabidopsis thaliana, EMBL:Z23161;supported by full-length cDNA: Ceres:164.                        | 245886_at | -0.5 |
| cytochrome b561, putative similar to cytochrome b561 GI:291 from (Bos taurus)                                                                         | 245818_at | -0.5 |
| hypothetical protein predicted by genscan+; supported by cDNA: gi_16323183_gb_AY057696.1_                                                             | 245776_at | -0.5 |
| unknown protein contains similarity to anthranilate synthase large subunit GI:1374671 from [Buchnera aphidicola]                                      | 245745_at | -0.5 |
| bHLH transcription factor, putative similar to bHLH transcription factor GI:3757520 from [Arabidopsis thaliana];supported by full-length cDNA: Ceres: | 245746_at | -0.5 |
| hypothetical protein predicted by genemark.hmm;supported by full-length cDNA: Ceres:20991.                                                            | 245666_at | -0.5 |
| enoyl-CoA hydratase like protein                                                                                                                      | 245484_at | -0.5 |
| disease resistance RPP5 like protein                                                                                                                  | 245448_at | -0.5 |
| tubulin alpha-6 chain (TUA6) ; supported by cDNA: gi_16226461_gb_AF428406.1_AF428406                                                                  | 245270_at | -0.5 |
| unknown protein predicted by genscan                                                                                                                  | 245165_at | -0.5 |
| putative poly(A) binding protein ; supported by cDNA: gi_15292850_gb_AY050859.1_                                                                      | 245085_at | -0.5 |
| RNA polymerase alpha subunit                                                                                                                          | 244978_at | -0.5 |
| hypothetical protein predicted by genscan+                                                                                                            | 257061_at | -0.5 |
| hypothetical protein predicted by genscan                                                                                                             | 267549_at | -0.5 |
| putative 1-aminocyclopropane-1-carboxylate oxidase similar to ESTs emb Z34690, gb T04168, gb H37738, gb T76913, gb T43801, amd gb T2196               | 264843_at | -0.5 |
| unknown protein ;supported by full-length cDNA: Ceres:15062.                                                                                          | 260004_at | -0.5 |
| unknown protein similar to GB:AAC28186                                                                                                                | 259701_at | -0.5 |
| putative UDP-glucose glucosyltransferase similar to GB:Q40284 from [Manihot esculenta]                                                                | 257949_at | -0.5 |
| cytochrome P450 homolog, putative similar to cytochrome P450 homolog GB:U54770 GI:1421740 from [Lycopersicon esculentum];supported by fu              | 256598_at | -0.5 |
| homeodomain containing protein 1 ; supported by cDNA: gi_2506030_dbj_D43962.1_D43962                                                                  | 253466_at | -0.5 |
| putative protein hypothetical proteins - Arabidopsis thaliana                                                                                         | 252765_at | -0.5 |
| putative protein predicted protein, Arabidopsis thaliana                                                                                              | 252204_at | -0.5 |
| ethylene-regulated nuclear protein ERT2-like protein                                                                                                  | 249042_at | -0.5 |
| putative protein similar to unknown protein (gb AAD28645.1);supported by full-length cDNA: Ceres:14816.                                               | 248685_at | -0.5 |
| amino acid transport protein AAP2 ;supported by full-length cDNA: Ceres:114602.                                                                       | 245891_at | -0.5 |

**Table 5: Transcripts suppressed during heat shock compared to unstressed plants**

|                                                                                                                                                 | <b>Affimetrix<br/>number</b> | <b>log<sub>2</sub> fold<br/>supressed</b> |
|-------------------------------------------------------------------------------------------------------------------------------------------------|------------------------------|-------------------------------------------|
| Descriptions                                                                                                                                    |                              |                                           |
| putative protein predicted proteins, Arabidopsis thaliana                                                                                       | 247474_at                    | -5.8                                      |
| late embryogenis abundant protein, putative similar to late embryogenis abundant protein 5 GI:2981167 from [Nicotiana tabacum];supported by fi  | 262113_at                    | -5.5                                      |
| unknown protein ;supported by full-length cDNA: Ceres:4309.                                                                                     | 248062_at                    | -5.2                                      |
| unknown protein                                                                                                                                 | 262832_s_at                  | -4.9                                      |
| DNA-binding protein, putative similar to DNA binding protein CCA1 from [Arabidopsis thaliana]                                                   | 261569_at                    | -4.8                                      |
| protein kinase, putative contains Pfam profile: PF00069: Eukaryotic protein kinase domain                                                       | 256366_at                    | -4.8                                      |
| putative phytochelatin synthetase - like putative phytochelatin synthetase, Arabidopsis thaliana, EMBL:ATH6787                                  | 247604_at                    | -4.8                                      |
| hypothetical protein similar to hypothetical protein GI:6524175 from [Arabidopsis thaliana];supported by full-length cDNA: Ceres:3618.          | 245816_at                    | -4.6                                      |
| putative protein prib5, Ribes nigrum, EMBL:RNI7578;supported by full-length cDNA: Ceres:31361.                                                  | 251400_at                    | -4.2                                      |
| hypothetical protein predicted by genscan+                                                                                                      | 259385_at                    | -4.1                                      |
| putative protein other hypothetical proteins in Arabidopsis thaliana; supported by cDNA: gi_6457330_gb_AF188329.1_AF188329                      | 252060_at                    | -4.1                                      |
| putative protein                                                                                                                                | 251003_at                    | -4                                        |
| putative mutT domain protein                                                                                                                    | 263852_at                    | -3.8                                      |
| putative monodehydroascorbate reductase (NADH) similar to monodehydroascorbate reductase (NADH) GB:JU0182 [Cucumis sativus]; supporte           | 258941_at                    | -3.8                                      |
| unknown protein                                                                                                                                 | 258362_at                    | -3.8                                      |
| peroxidase ATP19a                                                                                                                               | 254914_at                    | -3.8                                      |
| unknown protein ;supported by full-length cDNA: Ceres:207075.                                                                                   | 249836_at                    | -3.8                                      |
| myrosinase-associated protein, putative similar to myrosinase-associated protein GI:1769967 from [Brassica napus]; supported by cDNA: gi_158    | 263161_at                    | -3.7                                      |
| unknown protein                                                                                                                                 | 249740_at                    | -3.7                                      |
| putative protein hypothetical protein At2g41240 - Arabidopsis thaliana, EMBL:AC005662                                                           | 251677_at                    | -3.6                                      |
| hypothetical protein predicted by genscan and genefinder                                                                                        | 265892_at                    | -3.5                                      |
| putative chitinase similar to peanut type II chitinase, GenBank accession number X82329, E.C. 3.2.1.14                                          | 255595_at                    | -3.5                                      |
| beta-1,3-glucanase                                                                                                                              | 251673_at                    | -3.5                                      |
| putative MYB-related protein similar to MYB-related protein GB:CAA73305                                                                         | 258723_at                    | -3.3                                      |
| glutathione S-transferase-like protein ; supported by cDNA: gi_11096011_gb_AF288189.1_AF288189                                                  | 250083_at                    | -3.3                                      |
| unknown protein                                                                                                                                 | 248963_at                    | -3.3                                      |
| MYB-related transcription factor (CCA1)                                                                                                         | 266719_at                    | -3.2                                      |
| hypothetical protein Similar to human BC-2 protein, gi 2828147; supported by cDNA: gi_15529227_gb_AY05223f                                      | 265044_at                    | -3.2                                      |
| histone H3 - like protein histone H3, Arabidopsis thaliana, PIR:S06250                                                                          | 250433_at                    | -3.2                                      |
| O-methyltransferase - like protein caffeic acid O-methyltransferase, Pinus taeda, gb:U39301                                                     | 253177_s_at                  | -3.2                                      |
| unknown protein                                                                                                                                 | 266157_at                    | -3.1                                      |
| glutathione S-transferase, putative similar to glutathione S-transferase GI:860955 from [Hyoscyamus muticus]; supported by cDNA: gi_15215607    | 262119_s_at                  | -3.1                                      |
| thaumatin-like protein similar to thaumatin GB:AAD55090 [Vitis riparia]; contains Pfam profile: PF00314 Thaumatin family; supported by cDNA: gi | 259925_at                    | -3.1                                      |
| serine/threonine-specific protein kinase - like putative protein serine /threonine kinase, Sorghum bicolor, EMBL:SBRLK1                         | 247684_at                    | -3.1                                      |
| putative luminal binding protein Similar to Arabidopsis luminal binding protein (gb D89342)                                                     | 264648_at                    | -3.1                                      |
| zinc finger protein, putative similar to finger protein pcp1 GB:S48856 from [Solanum tuberosum]; supported by cDNA: gi_13605632_gb_AF3617f      | 257610_at                    | -3                                        |
| histone H2A - like protein histone H2A, parsley, PIR:S11498;supported by full-length cDNA: Ceres:20036.                                         | 247651_at                    | -3                                        |
| disease resistance protein RPP1-WsB, putative similar to disease resistance protein RPP1-WsB GI:9279731 from [Arabidopsis thaliana]             | 246405_at                    | -3                                        |
| putative protein hypothetical protein F17H15.20 Arabidopsis thaliana chromosome II BAC F17H15, PID:g3643606                                     | 253401_at                    | -2.9                                      |
| DNA (cytosine-5)-methyltransferase (DNA methyltransferase) (DNA metase) (sp P34881) ; supported by cDNA: gi_304106_gb_L10692.1_ATHM             | 248597_at                    | -2.9                                      |
| putative protein similar to unknown protein (emb CAA71173.1)                                                                                    | 248322_at                    | -2.9                                      |

|                                                                                                                                                  |             |      |
|--------------------------------------------------------------------------------------------------------------------------------------------------|-------------|------|
| spliceosomal protein (U2B), putative similar to spliceosomal protein (U2B) GI:169588 from [Solanum tuberosum]                                    | 256052_at   | -2.9 |
| Expressed protein ; supported by full-length cDNA: Ceres: 10388.                                                                                 | 264262_at   | -2.8 |
| AlG2-like protein similar to AlG2 protein GB:P54121 from [Arabidopsis thaliana];supported by full-length cDNA: Ceres:28511.                      | 258002_at   | -2.8 |
| unknown protein                                                                                                                                  | 256577_at   | -2.8 |
| pEARL1 1 ; supported by cDNA: gi_871779_gb_L43080.1_ATHPEAR                                                                                      | 254805_at   | -2.8 |
| beta-1,3-glucanase class I precursor ;supported by full-length cDNA: Ceres:3176.                                                                 | 245393_at   | -2.8 |
| putative protein other Arabidopsis hypothetical proteins                                                                                         | 253940_at   | -2.8 |
| unknown protein                                                                                                                                  | 265837_at   | -2.7 |
| putative tyrosine aminotransferase ;supported by full-length cDNA: Ceres:14570.                                                                  | 263539_at   | -2.7 |
| starch synthase, putative similar to starch synthase GI:21613 from [Solanum tuberosum];supported by full-length cDNA: Ceres:7714.                | 261191_at   | -2.7 |
| glutaredoxin, putative similar to glutaredoxin GB:CAA89699 GI:1732424 from [Ricinus communis];supported by full-length cDNA: Ceres:125679.       | 260831_at   | -2.7 |
| phosphoethanolamine N-methyltransferase, putative similar to GI:7407189 from [Spinacia oleracea]                                                 | 259842_at   | -2.7 |
| unknown protein ; supported by cDNA: gi_14596082_gb_AY042829.1_                                                                                  | 259791_at   | -2.7 |
| putative flowering-time gene CONSTANS (COL2) identical to putative flowering-time gene CONSTANS (COL2) GB:AAB67879 GI:1507699 (Arab              | 258497_at   | -2.7 |
| putative lectin similar to lectin SP:P02874 [Onobrychis vicifolia]; contains Pfam profile: PF00139 legume lectins beta domain; supported by cDNA | 257206_at   | -2.7 |
| glucosyltransferase like protein                                                                                                                 | 245624_at   | -2.7 |
| ATPase alpha subunit                                                                                                                             | 245024_at   | -2.7 |
| amylogenin; reversibly glycosylatable polypeptide ;supported by full-length cDNA: Ceres:7365.                                                    | 250130_at   | -2.7 |
| Expressed protein ; supported by full-length cDNA: Ceres: 17422.                                                                                 | 266767_at   | -2.6 |
| glutathione reductase, cytosolic identical to GB:P48641 from [Arabidopsis thaliana] (); supported by cDNA: gi_14532809_gb_AY040029.1_            | 257252_at   | -2.6 |
| NADH dehydrogenase 49KDa protein                                                                                                                 | 244937_at   | -2.6 |
| putative elicitor-responsive gene similar to elicitor-responsive gene-3 GB:AAC35866 from [Oryza sativa];supported by full-length cDNA: Ceres:189 | 260083_at   | -2.5 |
| unknown protein similar to hypothetical protein GB:CAA10289 [Cicer arietinum]; supported by full-length cDNA: Ceres: 108086.                     | 259272_at   | -2.5 |
| ribonucleotide reductase small subunit, putative similar to RIBONUCLEOSIDE-DIPHOSPHATE REDUCTASE SMALL CHAIN GB:P49730 from [I                   | 257809_at   | -2.5 |
| beta-fructofuranosidase identical to beta-fructofuranosidase GI:6683112 from [Arabidopsis thaliana]; supported by cDNA: gi_6683111_dbj_AB029     | 256150_at   | -2.5 |
| sucrose-phosphate synthase - like protein sucrose-phosphate synthase, Zea mays, PIR2:JQ1329                                                      | 255016_at   | -2.5 |
| dUTP pyrophosphatase-like protein dUTP pyrophosphatase - Lycopersicon esculentum,PIR2:JQ1599; supported by cDNA: gi_13878142_gb_AF               | 252442_at   | -2.5 |
| unknown protein                                                                                                                                  | 247878_at   | -2.5 |
| hypothetical protein predicted by genscan                                                                                                        | 266070_at   | -2.4 |
| hypothetical protein predicted by genscan                                                                                                        | 265724_at   | -2.4 |
| hypothetical protein predicted by genscan;supported by full-length cDNA: Ceres:10798.                                                            | 263535_at   | -2.4 |
| pale cress protein identical to GB:CAA65334;supported by full-length cDNA: Ceres:28047.                                                          | 262316_at   | -2.4 |
| anthocyanidin synthase - like protein putative leucoanthocyanidin dioxygenase, Arabidopsis thaliana, PID:g1575699                                | 254283_s_at | -2.4 |
| histone H2A.F/Z ;supported by full-length cDNA: Ceres:33085.                                                                                     | 251846_at   | -2.4 |
| putative two-component response regulator protein ; supported by cDNA: gi_11870067_gb_AF305721.1_AF305721                                        | 266078_at   | -2.3 |
| beta-glucosidase, putative identical to GI:6651430 from [Arabidopsis thaliana]; supported by cDNA: gi_14532461_gb_AY039855.1_                    | 259640_at   | -2.3 |
| S-adenosyl-L-homocysteinase, putative similar to S-adenosyl-L-homocysteinase GB:AAD56048 from [Lupinus luteus]; supported by cDNA: gi_152        | 257173_at   | -2.3 |
| thionin, putative similar to thionin [Arabidopsis thaliana] GI:1181533; supported by cDNA: gi_14190504_gb_AF380652.1_AF380652                    | 256527_at   | -2.3 |
| unknown protein contains Pfam profile: PF00917 MATH domain; supported by cDNA: gi_12083245_gb_AF332419.1_AF332419                                | 256021_at   | -2.3 |
| cell-cell signaling protein csgA - like cell-cell signaling protein csgA, Synechocystis sp., PIR2:S77176                                         | 254485_at   | -2.3 |
| unknown protein ;supported by full-length cDNA: Ceres:262293.                                                                                    | 250665_at   | -2.3 |
| UDP-glucose dehydrogenase-like protein UDP-glucose dehydrogenase - Glycine max, EMBL:U53418                                                      | 249469_at   | -2.3 |
| putative protein similar to unknown protein (pir) T05755)                                                                                        | 248160_at   | -2.3 |
| hypothetical protein ; supported by cDNA: gi_15810232_gb_AY056155.1_                                                                             | 245265_at   | -2.3 |

|                                                                                                                                                      |             |      |
|------------------------------------------------------------------------------------------------------------------------------------------------------|-------------|------|
| putative disease resistance protein                                                                                                                  | 267546_at   | -2.2 |
| unknown protein ;supported by full-length cDNA: Ceres:40283.                                                                                         | 266413_at   | -2.2 |
| putative caltractin ;supported by full-length cDNA: Ceres:7802.                                                                                      | 265460_at   | -2.2 |
| polygalacturonase PG1, putative similar to GB:AAD46483 from [Glycine max] (Mol. Plant Microbe Interact. 12 (6), 490-498 (1999)); supported by        | 260727_at   | -2.2 |
| unknown protein                                                                                                                                      | 259507_at   | -2.2 |
| putative phosphate/phosphoenolpyruvate translocator similar to phosphate/phosphoenolpyruvate translocator precursor GB:AAB40648 [Nicotiana           | 259185_at   | -2.2 |
| cinnamyl alcohol dehydrogenase identical to GB:P48523 from [Arabidopsis thaliana];supported by full-length cDNA: Ceres:4357.                         | 258023_at   | -2.2 |
| hypothetical protein predicted by genscan; supported by cDNA: gi_15292884_gb_AY050876.1_                                                             | 257057_at   | -2.2 |
| putative protein                                                                                                                                     | 253189_at   | -2.2 |
| putative protein hypersensitivity-related hsr201 protein - Nicotiana tabacum,PIR2:T03274                                                             | 252317_at   | -2.2 |
| histone H3 - like protein histone H3, Arabidopsis thaliana, PIR:S06250                                                                               | 250434_at   | -2.2 |
| unknown protein                                                                                                                                      | 248190_at   | -2.2 |
| ankyrin-repeat-containing protein-like                                                                                                               | 248169_at   | -2.2 |
| unknown protein                                                                                                                                      | 263549_at   | -2.1 |
| putative protein similar to T5J8.18                                                                                                                  | 255450_at   | -2.1 |
| putative protein hypothetical protein - Arabidopsis thaliana,PIR2:H71441;supported by full-length cDNA: Ceres:4642.                                  | 254746_at   | -2.1 |
| putative protein gamma-SNAP protein, bovine, PIR2:S32369;supported by full-length cDNA: Ceres:267158.                                                | 254476_at   | -2.1 |
| putative protein                                                                                                                                     | 252661_at   | -2.1 |
| putative calcium-binding protein calcium binding domains (EF hand) of several proteins                                                               | 252417_at   | -2.1 |
| putative protein                                                                                                                                     | 250942_at   | -2.1 |
| nucleoid DNA-binding protein cnd41 - like protein nucleoid DNA-binding protein cnd41, chloroplast, common tobacco, PIR:T01996                        | 250445_at   | -2.1 |
| ribosomal protein L23                                                                                                                                | 244988_s_at | -2.1 |
| ribosomal protein S12 (trans-splice part 2 of 2)                                                                                                     | 244940_at   | -2.1 |
| putative alcohol dehydrogenase                                                                                                                       | 266761_at   | -2   |
| unknown protein similar to gb T45484, emb Z30724, and emb Z30531                                                                                     | 264824_at   | -2   |
| putative s-adenosylmethionine synthetase ;supported by full-length cDNA: Ceres:13320.                                                                | 263838_at   | -2   |
| receptor-like protein kinase, putative similar to receptor-like protein kinase GB:AAC95353 GI:4008010 from [Arabidopsis thaliana]                    | 262507_at   | -2   |
| flax rust resistance protein, putative similar to flax rust resistance protein GI:4588066 from [Linum usitatissimum]; supported by full-length cDNA: | 262374_s_at | -2   |
| 12-oxophytodienoate reductase (OPR2) identical to 12-oxophytodienoate reductase OPR2 GB:AAC78441 [Arabidopsis thaliana]                              | 259875_s_at | -2   |
| hypothetical protein ; supported by cDNA: gi_14532585_gb_AY039917.1_                                                                                 | 259561_at   | -2   |
| unknown protein ;supported by full-length cDNA: Ceres:96816.                                                                                         | 257793_at   | -2   |
| unknown protein                                                                                                                                      | 256096_at   | -2   |
| putative serine carboxypeptidase II                                                                                                                  | 255842_at   | -2   |
| putative pectinacetyltransferase protein pectinacetyltransferase precursor, Vigna radiata, PIR2:S68805;supported by full-length cDNA: Ceres:34674.   | 254578_at   | -2   |
| putative protein centrin, Marsilea vestita;supported by full-length cDNA: Ceres:13072.                                                               | 253915_at   | -2   |
| dehydrin Xero2 ; supported by cDNA: gi_15809983_gb_AY054260.1_                                                                                       | 252102_at   | -2   |
| beta-1,3-glucanase 2 (BG2) (PR-2) ;supported by full-length cDNA: Ceres:21719.                                                                       | 251625_at   | -2   |
| Expressed protein ; supported by full-length cDNA: Ceres: 32396.                                                                                     | 251142_at   | -2   |
| unknown protein ; supported by cDNA: gi_15810044_gb_AY054291.1_                                                                                      | 250828_at   | -2   |
| amino acid permease 6 (emb CAA65051.1)                                                                                                               | 248619_at   | -2   |
| FRO2-like protein; NADPH oxidase-like                                                                                                                | 248566_s_at | -2   |
| putative protein contains similarity to ornithine cyclodeaminase;supported by full-length cDNA: Ceres:114678.                                        | 248330_at   | -2   |
| isp4 like protein ; supported by cDNA: gi_15451019_gb_AY054590.1_                                                                                    | 245296_at   | -2   |
| putative glutaredoxin ;supported by full-length cDNA: Ceres:21006.                                                                                   | 266516_at   | -1.9 |



|                                                                                                                                                |             |      |
|------------------------------------------------------------------------------------------------------------------------------------------------|-------------|------|
| unknown protein ;supported by full-length cDNA: Ceres:22382.                                                                                   | 266227_at   | -1.9 |
| unknown protein ; supported by cDNA: gi_15451161_gb_AY054661.1_                                                                                | 266142_at   | -1.9 |
| myrosinase-binding protein homolog, putative almost identical to myrosinase-binding protein homolog GI:2997767 from [Arabidopsis thaliana]; su | 265058_s_at | -1.9 |
| putative carboxypeptidase ; supported by cDNA: gi_15724217_gb_AF412049.1_AF412049                                                              | 264071_at   | -1.9 |
| putative harpin-induced protein ;supported by full-length cDNA: Ceres:19481.                                                                   | 263951_at   | -1.9 |
| unknown protein location of EST TAT5A03; 5 end, gb Z26679                                                                                      | 262656_at   | -1.9 |
| zinc finger protein, putative similar to zinc finger protein ID1 GB:AAC18941 GI:3170601 from [Zea mays]                                        | 260776_at   | -1.9 |
| hypothetical protein predicted by genemark.hmm; supported by cDNA: gi_14423519_gb_AF386997.1_AF386997                                          | 259617_at   | -1.9 |
| unknown protein ; supported by full-length cDNA: Ceres: 20582.                                                                                 | 259403_at   | -1.9 |
| putative disease resistance protein similar to disease resistance protein RPP1-WsC GB:AAC72979 [Arabidopsis thaliana]; supported by cDNA: gi   | 258537_at   | -1.9 |
| Histone H4 - like protein histone H4, Zea mays, PIR:HSZM4;supported by full-length cDNA: Ceres:22146.                                          | 252562_s_at | -1.9 |
| putative protein serine/threonine protein kinase ATPK10 - Arabidopsis thaliana, EMBL:D30622; supported by cDNA: gi_13249126_gb_AF295666        | 251060_at   | -1.9 |
| putative protein contains similarity to photomorphogenesis repressor protein; supported by cDNA: gi_14532633_gb_AY039941.1_                    | 249798_at   | -1.9 |
| putative protein predicted proteins, Arabidopsis thaliana                                                                                      | 249463_s_at | -1.9 |
| amino acid permease                                                                                                                            | 249346_at   | -1.9 |
| 3-keto-acyl-CoA thiolase 2 (gb AAC17877.1) ; supported by cDNA: gi_3192892_gb_AF062590.1_AF062590                                              | 248625_at   | -1.9 |
| flavonol 3-O-glucosyltransferase-like                                                                                                          | 248185_at   | -1.9 |
| putative protein similar to unknown protein (pir T05752);supported by full-length cDNA: Ceres:109272.                                          | 248164_at   | -1.9 |
| putative protein similar to unknown protein (gb AAF67766.1);supported by full-length cDNA: Ceres:512.                                          | 246997_at   | -1.9 |
| putative pectinesterase                                                                                                                        | 245052_at   | -1.9 |
| putative myrosinase-binding protein ;supported by full-length cDNA: Ceres:39069.                                                               | 266989_at   | -1.8 |
| pathogenesis-related PR-1-like protein identical to GB:M90508; supported by cDNA: gi_166860_gb_M90508.1_ATHRPRP1A                              | 266385_at   | -1.8 |
| putative 2,3-bisphosphoglycerate-independent phosphoglycerate mutase Strong similarity to R. communis phosphoglycerate mutase (gb X70652       | 264668_at   | -1.8 |
| putative GDSL-motif lipase/hydrolase similar to APG proteins; pFAM domain PF00657;supported by full-length cDNA: Ceres:121397.                 | 263482_at   | -1.8 |
| hypothetical protein                                                                                                                           | 262661_s_at | -1.8 |
| jasmonate inducible protein isolog ;supported by full-length cDNA: Ceres:119153.                                                               | 259382_s_at | -1.8 |
| Expressed protein ; supported by full-length cDNA: Ceres: 35429.                                                                               | 258349_at   | -1.8 |
| hypothetical protein similar to CGI-18 protein GB:AAD27727 [Homo sapiens]                                                                      | 258049_at   | -1.8 |
| zinc finger protein, putative contains Pfam profile: PF01760 CONSTANS family zinc finger;supported by full-length cDNA: Ceres:258241.          | 257262_at   | -1.8 |
| PHD-finger protein, putative contains Pfam profile: PF00628 PHD-finger;supported by full-length cDNA: Ceres:95660.                             | 256889_at   | -1.8 |
| serine/threonine kinase - like protein serine/threonine kinase, Brassica oleraceae                                                             | 254250_at   | -1.8 |
| putative potassium transporter AtKT5p (AtKT5)                                                                                                  | 253330_at   | -1.8 |
| hypothetical protein                                                                                                                           | 252345_at   | -1.8 |
| glutaredoxin -like protein glutaredoxin, castor bean, PIR:S54825                                                                               | 251196_at   | -1.8 |
| putative protein contains similarity to DNA-binding protein                                                                                    | 249890_at   | -1.8 |
| putative protein similar to unknown protein (emb CAB62461.1);supported by full-length cDNA: Ceres:268701.                                      | 249752_at   | -1.8 |
| putative protein similar to unknown protein (pir T05562); supported by full-length cDNA: Ceres: 158397.                                        | 248551_at   | -1.8 |
| tyrosine aminotransferase                                                                                                                      | 248207_at   | -1.8 |
| putative protein similar to unknown protein (pir T04819)                                                                                       | 248139_at   | -1.8 |
| unknown protein contains similarity to anthranilate synthase large subunit GI:1374671 from [Buchnera aphidicola]                               | 245745_at   | -1.8 |
| putative protein similarity to predicted proteins, Arabidopsis thaliana                                                                        | 245155_at   | -1.8 |
| NADH dehydrogenase ND1                                                                                                                         | 244936_at   | -1.8 |
| calcium binding protein (CaBP-22) identical to GB:Z12136;supported by full-length cDNA: Ceres:123659.                                          | 267076_at   | -1.7 |
| unknown protein ; supported by cDNA: gi_14517479_gb_AY039575.1_                                                                                | 266017_at   | -1.7 |

|                                                                                                                                                  |             |      |
|--------------------------------------------------------------------------------------------------------------------------------------------------|-------------|------|
| 5 -adenylylphosphosulfate reductase, putative similar to 5 -adenylylphosphosulfate reductase GI:1336168 from [Arabidopsis thaliana];supported    | 264745_at   | -1.7 |
| putative RAS-related protein, RAB11C Strong similarity to A. thaliana ara-2 (gb ATHARA2). ESTs gb ATTS2483.gb ATTS2484.gb AA042159 cor           | 264669_at   | -1.7 |
| unknown protein similar to PHZF, catalyzing the hydroxylation of phenazine-1-carboxylic acid to2-hydroxy-phenazine-1-carboxylic acid; ESTs gb    | 264355_at   | -1.7 |
| putative beta-ketoacyl-CoA synthase                                                                                                              | 263606_at   | -1.7 |
| unknown protein                                                                                                                                  | 263565_at   | -1.7 |
| peptide transporter, putative predicted by genemark.hmm; supported by cDNA: gi_15810442_gb_AY056260.1_                                           | 261958_at   | -1.7 |
| pectin methylesterase, putative similar to pectin methylesterase GI:1617583 from [Lycopersicon esculentum]; supported by cDNA: gi_14334991_      | 261826_at   | -1.7 |
| hypothetical protein predicted by genemark.hmm                                                                                                   | 261684_at   | -1.7 |
| unknown protein                                                                                                                                  | 260904_at   | -1.7 |
| flower development protein cycloidea (cyc3), putative similar to flower development protein cycloidea (cyc3) GI:6358611 from [Misopates orontiu] | 260618_at   | -1.7 |
| hypothetical protein predicted by genemark.hmm; supported by cDNA: gi_16648778_gb_AY058166.1_                                                    | 259373_at   | -1.7 |
| unknown protein                                                                                                                                  | 258100_at   | -1.7 |
| unknown protein ;supported by full-length cDNA: Ceres:40534.                                                                                     | 258040_at   | -1.7 |
| disease resistance protein, putative similar to GB:AAD13301 from [Lycopersicon esculentum], contains Pfam profiles: PF00560 Leucine Rich Re      | 257100_at   | -1.7 |
| putative inorganic phosphatase ; supported by cDNA: gi_15450871_gb_AY054516.1_                                                                   | 255587_at   | -1.7 |
| glycine hydroxymethyltransferase - like protein glycine hydroxymethyltransferase, Homo sapiens, PIR2:A46746                                      | 254740_s_at | -1.7 |
| serine threonine kinase - like protein KI domain interacting kinase 1 (KIK1), Zea mays; supported by cDNA: gi_13506746_gb_AF224706.1_AF22        | 254265_s_at | -1.7 |
| Expressed protein ; supported by cDNA: gi_14190492_gb_AF380646.1_AF380646                                                                        | 253423_at   | -1.7 |
| putative auxin-induced protein auxin-induced protein 10A, Glycine max., PIR2:JQ1099                                                              | 252965_at   | -1.7 |
| putative protein carbonyl reductase (NADPH) - Rattus norvegicus, PIR:JC5285; supported by cDNA: gi_15028054_gb_AY045884.1_                       | 251309_at   | -1.7 |
| putative protein predicted protein, Arabidopsis thaliana                                                                                         | 249919_at   | -1.7 |
| sigma-like factor (emb CAA77213.1)                                                                                                               | 249769_at   | -1.7 |
| calcium-binding protein - like cbp1 calcium-binding protein, Lotus japonicus, EMBL:LJA251808; supported by cDNA: gi_16648829_gb_AY05819:         | 249417_at   | -1.7 |
| histone H3 (sp P05203) ; supported by cDNA: gi_13926210_gb_AF370577.1_AF370577                                                                   | 247192_at   | -1.7 |
| putative protein similar to unknown protein (emb CAB62301.1)                                                                                     | 247030_at   | -1.7 |
| hypothetical protein predicted by genemark.hmm;supported by full-length cDNA: Ceres:42217.                                                       | 245755_at   | -1.7 |
| disease resistance RPP5 like protein (fragment)                                                                                                  | 245450_at   | -1.7 |
| DNA-3-methyladenine glycosidase, putative similar to DNA-3-methyladenine glycosidase GB:CAB60736 GI:6434028 from [Staphylococcus aurei]          | 257474_at   | -1.7 |
| DNA polymerase alpha subunit IV (primase)-like protein                                                                                           | 249276_at   | -1.7 |
| putative phosphomannomutase ;supported by full-length cDNA: Ceres:998.                                                                           | 266928_at   | -1.6 |
| putative glycine dehydrogenase                                                                                                                   | 266892_at   | -1.6 |
| putative glutathione S-transferase ; supported by cDNA: gi_14423533_gb_AF387004.1_AF387004                                                       | 266267_at   | -1.6 |
| putative membrane channel protein ;supported by full-length cDNA: Ceres:10159.                                                                   | 266225_at   | -1.6 |
| unknown protein ;supported by full-length cDNA: Ceres:108956.                                                                                    | 265384_at   | -1.6 |
| similar to flavin-containing monooxygenase (sp P36366); similar to ESTs gb R30018, gb H36886, gb N37822, and gb T88100 similar to flavin-cor     | 265121_at   | -1.6 |
| hypothetical protein predicted by genscan+;supported by full-length cDNA: Ceres:36412.                                                           | 264091_at   | -1.6 |
| putative RNA-binding protein Identical to gb Y10557 g5bf gene from Arabidopsis thaliana. ESTs gb R30578, gb R90475, gb T22384, gb T22425,        | 263676_at   | -1.6 |
| putative CONSTANS-like B-box zinc finger protein ; supported by cDNA: gi_12698721_gb_AF323666.1_AF323666                                         | 263252_at   | -1.6 |
| calreticulin, putative similar to calreticulin GB:AAC49697 GI:2052383 from [Arabidopsis thaliana]; supported by cDNA: gi_2052382_gb_U66345.1     | 261692_at   | -1.6 |
| Ca2+-dependent membrane-binding protein annexin identical to GB:AAD34236 from [Arabidopsis thaliana];supported by full-length cDNA: Cere:        | 261285_at   | -1.6 |
| Cyclin, putative similar to GB:CAB77269 from [Pisum sativum]                                                                                     | 260506_at   | -1.6 |
| unknown protein ;supported by full-length cDNA: Ceres:142725.                                                                                    | 259980_at   | -1.6 |
| unknown protin ;supported by full-length cDNA: Ceres:37425.                                                                                      | 259275_at   | -1.6 |
| heat-shock protein (At-hsc70-3) identical to (At-hsc70-3) (cytosolic Hsp70) GB:CAA76606 [Arabidopsis thaliana]; supported by cDNA: gi_152929:    | 258979_at   | -1.6 |

|                                                                                                                                                             |             |      |
|-------------------------------------------------------------------------------------------------------------------------------------------------------------|-------------|------|
| disease resistance protein, putative similar to Hcr2-5b GB:AAC78595 [ <i>Lycopersicon esculentum</i> ] (Plant Cell 10, 1915-1926 (1998)); contains Pfa      | 257763_s_at | -1.6 |
| unknown protein ; supported by full-length cDNA: Ceres: 148308.                                                                                             | 256456_at   | -1.6 |
| unknown protein contains similarity to alternative NADH-dehydrogenase GI:3718005 from [ <i>Yarrowia lipolytica</i> ];supported by full-length cDNA: Cer     | 256057_at   | -1.6 |
| putative cinnamoyl-CoA reductase highly similar to F4P9.36                                                                                                  | 255845_at   | -1.6 |
| PRH26 protein ;supported by full-length cDNA: Ceres:36866.                                                                                                  | 254343_at   | -1.6 |
| acid phosphatase-like protein acid phosphatase-1 (EC 3.1.3.-) - <i>Lycopersicon esculentum</i> ,PIR2:T06587; supported by cDNA: gi_15293022_gb_             | 253731_at   | -1.6 |
| hypothetical protein                                                                                                                                        | 252501_at   | -1.6 |
| putative protein several hypothetical Na(+)/H(+) antiporter                                                                                                 | 251906_at   | -1.6 |
| putative protein hypothetical protein F22K20.16 - <i>Arabidopsis thaliana</i> , EMBL:AC002291                                                               | 251701_at   | -1.6 |
| putative protein beta-(1-3)-glucosyl transferase, <i>Bradyrhizobium japonicum</i> , EMBL:AF047687; supported by cDNA: gi_16974551_gb_AY060563.              | 250892_at   | -1.6 |
| asparaginase ; supported by cDNA: gi_14517439_gb_AY039555.1_                                                                                                | 250547_at   | -1.6 |
| putative protein similar to unknown protein (dbj BAA92898.1);supported by full-length cDNA: Ceres:97314.                                                    | 249230_at   | -1.6 |
| putative protein contains similarity to calmodulin;supported by full-length cDNA: Ceres:99348.                                                              | 249197_at   | -1.6 |
| putative protein contains similarity to unknown protein (dbj BAA90637.1)                                                                                    | 248309_at   | -1.6 |
| putative protein similar to unknown protein (gb AAD26950.1); supported by full-length cDNA: Ceres: 33791.                                                   | 248261_at   | -1.6 |
| putative protein similar to unknown protein (gb AAF21150.1)                                                                                                 | 247958_at   | -1.6 |
| unknown protein                                                                                                                                             | 247415_at   | -1.6 |
| AtPP -like protein AtPP protein, <i>Brassica napus</i> , EMBL:BNA245479; supported by cDNA: gi_15293070_gb_AY050969.1_                                      | 246340_s_at | -1.6 |
| phytochrome kinase substrate 1 - like protein                                                                                                               | 245696_at   | -1.6 |
| hypothetical protein ; supported by full-length cDNA: Ceres: 933.                                                                                           | 245304_at   | -1.6 |
| carboxytransferase beta subunit                                                                                                                             | 245016_at   | -1.6 |
| ribosomal protein L2                                                                                                                                        | 244987_s_at | -1.6 |
| ribosomal protein S7                                                                                                                                        | 244992_s_at | -1.6 |
| protein kinase - like protein serine threonine kinase - <i>Brassica oleracea</i> ; supported by cDNA: gi_13506748_gb_AF224707.1_AF224707                    | 254266_at   | -1.6 |
| putative acetone-cyanohydrin lyase                                                                                                                          | 267126_s_at | -1.5 |
| putative glutathione S-transferase ;supported by full-length cDNA: Ceres:27915.; supported by cDNA: gi_11095995_gb_AF288181.1_AF288181                      | 266746_s_at | -1.5 |
| histone H4 identical to GB:M17133 and GB:M17132;supported by full-length cDNA: Ceres:32642.                                                                 | 266226_at   | -1.5 |
| putative replication protein A1 ;supported by full-length cDNA: Ceres:7536.                                                                                 | 265695_at   | -1.5 |
| beta-expansin ;supported by full-length cDNA: Ceres:109135.                                                                                                 | 265443_at   | -1.5 |
| unknown protein contains Pfam profile:PF01762 Galactosyltransferase                                                                                         | 264978_at   | -1.5 |
| unknown protein similar to hypothetical protein GI:9665091 from [ <i>Arabidopsis thaliana</i> ]                                                             | 264998_at   | -1.5 |
| putative fructokinase ; supported by full-length cDNA: Ceres: 17664.                                                                                        | 263250_at   | -1.5 |
| water stress-induced protein, putative similar to water stress-induced protein, GI:454880 from [ <i>Oryza sativa</i> ]; supported by full-length cDNA: Cere | 262958_at   | -1.5 |
| unknown protein                                                                                                                                             | 262693_at   | -1.5 |
| putative prenyl transferase (prephytoene pyrophosphatase dehydrogenase) Except for first 55 amino acids, 52% identical to Prenyl transferase [(             | 262526_at   | -1.5 |
| lysophospholipase homolog, putative similar to lysophospholipase homolog GB:AAB97366 GI:2801536 from [ <i>Oryza sativa</i> ]                                | 261661_at   | -1.5 |
| 2,4-D inducible glutathione S-transferase, putative similar to 2,4-D inducible glutathione S-transferase GI:2920666 from [ <i>Glycine max</i> ];supported   | 260745_at   | -1.5 |
| integral membrane protein, putative similar to GB:U43629 from [ <i>Beta vulgaris</i> ] (Plant Physiol. 110 110 (2), 511-520 (1996)); supported by cDNA:     | 260676_at   | -1.5 |
| putative peptidyl-prolyl cis-trans isomerase ; supported by cDNA: gi_15215840_gb_AY050450.1_                                                                | 260530_at   | -1.5 |
| unknown protein similar to hypothetical protein GB:S33464 [ <i>Arabidopsis thaliana</i> ]; supported by cDNA: gi_14517447_gb_AY039559.1_                    | 259228_at   | -1.5 |
| reversibly glycosylated polypeptide-1 identical to reversibly glycosylated polypeptide-1 (implicated in cell wall biosynthesis) GB:AAC50000 [ <i>Arabic</i> | 259077_s_at | -1.5 |
| putative pectinacetyltransferase similar to GB:CAA67728 from [ <i>Vigna radiata</i> ]; supported by cDNA: gi_15292826_gb_AY050847.1_                        | 258750_at   | -1.5 |
| Expressed protein ; supported by full-length cDNA: Ceres: 6490.                                                                                             | 258470_at   | -1.5 |
| unknown protein ;supported by full-length cDNA: Ceres:20618.                                                                                                | 257710_at   | -1.5 |

|                                                                                                                                                 |             |      |
|-------------------------------------------------------------------------------------------------------------------------------------------------|-------------|------|
| cyclopropane-fatty-acyl-phospholipid synthase, putative similar to cyclopropane-fatty-acyl-phospholipid synthase GB:P30010 [Escherichia coli]   | 257175_s_at | -1.5 |
| disease resistance protein, putative similar to GB:AAD13301 from [Lycopersicon esculentum], contains Pfam profiles: PF00560 Leucine Rich Re     | 257101_at   | -1.5 |
| receptor protein kinase, putative contains Pfam profiles: PF00069: Eukaryotic protein kinase domain, multiple PF00560: Leucine Rich Repeat      | 256168_at   | -1.5 |
| putative protein                                                                                                                                | 255652_at   | -1.5 |
| growth factor like protein antisense basic fibroblast growth factor GFG - Rattus norvegicus, PID:g1518635;supported by full-length cDNA: Ceres: | 254784_at   | -1.5 |
| putative protein CGI-131 protein, Homo sapiens, AF151889;supported by full-length cDNA: Ceres:24573.                                            | 254387_at   | -1.5 |
| putative protein rape mRNA, Brassica napus, PIR2:S42651                                                                                         | 254259_s_at | -1.5 |
| low temperature and salt responsive protein homolog low temperature and salt responsive protein LTI6A - Arabidopsis thaliana,PID:g4039153       | 253627_at   | -1.5 |
| putative protein AT.I.24-7, Arabidopsis thaliana, gb:U63815                                                                                     | 253215_at   | -1.5 |
| putative protein strictosidine synthase (EC 4.3.3.2) - Rauvolfia mannii (fragment);supported by full-length cDNA: Ceres:98698.                  | 251658_at   | -1.5 |
| UDP-GlcNAc:dolichol phosphate N-acetylglucosamine-1-phosphate transferase-like protein UDP-GlcNAc:dolichol phosphate N-acetylglucosamir         | 251626_at   | -1.5 |
| protein phosphatase - like protein protein phosphatase 2C homolog, Mesembryanthemum crystallinum, EMBL:AF097667                                 | 251017_at   | -1.5 |
| short chain alcohol dehydrogenase-like ;supported by full-length cDNA: Ceres:111427.                                                            | 250763_at   | -1.5 |
| putative protein contains similarity to ribose 5-phosphate isomerase;supported by full-length cDNA: Ceres:32092.                                | 249002_at   | -1.5 |
| putative protein similar to unknown protein (pir T06700)                                                                                        | 248986_at   | -1.5 |
| urea active transporter-like protein                                                                                                            | 248970_at   | -1.5 |
| putative protein similar to unknown protein (pir T04427)                                                                                        | 248943_s_at | -1.5 |
| unknown protein ;supported by full-length cDNA: Ceres:15495.                                                                                    | 248889_at   | -1.5 |
| putative protein similar to unknown protein (pir S72530);supported by full-length cDNA: Ceres:32925.                                            | 248683_at   | -1.5 |
| putative protein similar to unknown protein (sp P29618);supported by full-length cDNA: Ceres:95459.                                             | 248270_at   | -1.5 |
| apospory-associated protein C-like                                                                                                              | 247101_at   | -1.5 |
| hypothetical protein                                                                                                                            | 246281_at   | -1.5 |
| unknown protein                                                                                                                                 | 245744_at   | -1.5 |
| disease resistance RPP5 like protein                                                                                                            | 245448_at   | -1.5 |
| PSII 32 KDa protein                                                                                                                             | 245047_at   | -1.5 |
| ATPase I subunit                                                                                                                                | 245025_at   | -1.5 |
| unknown protein ; supported by cDNA: gi_14532501_gb_AY039875.1_                                                                                 | 256627_at   | -1.5 |
| putative alliin lyase alliin lyase (EC 4.4.1.4) precursor (CYSTEINE SULPHOXIDE LYASE), onion, PIR2:S29301; supported by cDNA: gi_152926         | 254125_at   | -1.5 |
| S-adenosylmethionine decarboxylase (adoMetDC2) ; supported by cDNA: gi_16930682_gb_AF436825.1_AF436825                                          | 246490_at   | -1.5 |
| putative proline-rich protein ; supported by full-length cDNA: Ceres: 28853.                                                                    | 267260_at   | -1.4 |
| hypothetical protein predicted by genscan and genefinder                                                                                        | 266363_at   | -1.4 |
| putative phosphoglucomutase similar to GB:AAD13031 and GB:AAC50049, location of ESTs gb W43354, gb N37499 and gb N96251; supported              | 264903_at   | -1.4 |
| lipoyltransferase identical to GB:BAA78386; supported by cDNA: gi_4996285_dbj_AB020975.1_AB020975                                               | 264613_at   | -1.4 |
| unknown protein                                                                                                                                 | 264172_at   | -1.4 |
| unknown protein contains similarity to gi 1653332 extragenic suppressor (SuhB) from Synechocystis sp. gb D90912 and is a member of the Inosit   | 263705_at   | -1.4 |
| unknown protein ;supported by full-length cDNA: Ceres:11114.                                                                                    | 263628_at   | -1.4 |
| putative NAD+ dependent isocitrate dehydrogenase subunit 2, IDH2 genomic copy of ICDH2 cDNA U81994, ESTs R29962, R29955 catalyzes th            | 263583_at   | -1.4 |
| putative pyrophosphate-dependent phosphofructokinase alpha subunit similar to GB:AAC67587 from [Citrus X paradisi] and GB:Q41140 from [Ri       | 262806_at   | -1.4 |
| unknown protein ; supported by cDNA: gi_15215593_gb_AY050325.1_                                                                                 | 262634_at   | -1.4 |
| glutamate decarboxylase (gad), putative similar to glutamate decarboxylase (gad) GI:294111 from [Petunia hybrida]; supported by cDNA: gi_118    | 261970_at   | -1.4 |
| dirigent protein, putative similar to dirigent protein GI:6694693 from [ Forsythia intermedia]                                                  | 261914_at   | -1.4 |
| hypothetical protein predicted by genemark.hmm; supported by full-length cDNA: Ceres: 268411.                                                   | 261351_at   | -1.4 |
| pectinesterase, putative similar to GB:Z94058 from [Lycopersicon esculentum]; supported by cDNA: gi_16648888_gb_AY059814.1_                     | 261363_at   | -1.4 |
| hypothetical protein predicted by genemark.hmm                                                                                                  | 261221_at   | -1.4 |

|                                                                                                                                                   |             |      |
|---------------------------------------------------------------------------------------------------------------------------------------------------|-------------|------|
| unknown protein ;supported by full-length cDNA: Ceres:32887.                                                                                      | 261032_at   | -1.4 |
| beta-galactosidase, putative similar to beta-galactosidase GI:3299896 from [Lycopersicon esculentum]; supported by cDNA: gi_16604399_gb_A'        | 260944_at   | -1.4 |
| fructose 1,6-bisphosphatase, putative similar to cytosolic fructose-1,6-bisphosphatase GB:AAD28755 GI:4741918 from [Musa acuminata]               | 260837_at   | -1.4 |
| unknown protein ; supported by cDNA: gi_15810460_gb_AY056269.1_                                                                                   | 260501_at   | -1.4 |
| hypothetical protein similar to YGL010w-like protein GB:AAC32136 [Picea mariana]                                                                  | 260211_at   | -1.4 |
| unknown protein                                                                                                                                   | 260081_at   | -1.4 |
| unknown protein supported by cDNA: Ceres:13335                                                                                                    | 260072_at   | -1.4 |
| endo-beta-1,4-glucanase, putative similar to GI:4972236 from [Fragaria x ananassa] (Plant Mol. Biol. 40, 323-332 (1999)); supported by cDNA: g    | 259736_at   | -1.4 |
| putative signal peptidase similar to MITOCHONDRIAL INNER MEMBRANE PROTEASE SUBUNIT 2 GB:P46972 [Saccharomyces cerevisiae]                         | 259199_at   | -1.4 |
| putative 40S ribosomal protein similar to ribosomal protein S7 GB:AAD26256 from [Secale cereale];supported by full-length cDNA: Ceres:30349.      | 258486_at   | -1.4 |
| hypothetical protein contains similarity to 3-hydroxyisobutyrate dehydrogenase GB:AAC06408 from [Aquifex aeolicus]; supported by cDNA: gi_15      | 257911_at   | -1.4 |
| xyloglucan endotransglycosylase, putative similar to xyloglucan endotransglycosylase 1 GB:CAA10231 from [Fagus sylvatica] (Plant Physiol.(19      | 257203_at   | -1.4 |
| unknown protein contains Pfam profile:PF00279 LTP:Plant lipid transfer protein family;supported by full-length cDNA: Ceres:19287.                 | 256933_at   | -1.4 |
| zinc-finger protein, putative similar to GI:5262161 from [Arabidopsis thaliana]; supported by cDNA: gi_16323142_gb_AY057675.1_                    | 256469_at   | -1.4 |
| putative disease resistance protein similar to disease resistance protein GB:AAC78591 [Lycopersicon esculentum]                                   | 256431_s_at | -1.4 |
| nascent polypeptide associated complex alpha chain, putative similar to nascent polypeptide associated complex alpha chain GB:AAF27917 GI:(       | 256241_at   | -1.4 |
| putative arginase similar to arginases (Pfam: PF00491, Score=353.2, E=1.4e-119, N=1);supported by full-length cDNA: Ceres:33985.                  | 255065_s_at | -1.4 |
| putative alpha NAC stong similarity to Nascent polypeptide associated complex alpha chain - human, PIR2:S49326; supported by cDNA: gi_150         | 254981_at   | -1.4 |
| putative pollen surface protein endosperm specific protein - Zea mays, PID:g2104712;supported by full-length cDNA: Ceres:4620.                    | 254785_at   | -1.4 |
| SERINE CARBOXYPEPTIDASE I PRECURSOR-like protein SERINE CARBOXYPEPTIDASE I PRECURSOR - Hordeum vulgare, SWall:CBP1_                               | 254791_at   | -1.4 |
| putative dihydrolipoamide succinyltransferase dihydrolipoamide succinyltransferase (EC 2.3.1.61) precursor - rat, Pir2:A41015;supported by full-l | 253950_at   | -1.4 |
| putative protein predicted protein, Arabidopsis thaliana;supported by full-length cDNA: Ceres:4354.                                               | 253165_at   | -1.4 |
| guanine nucleotide-exchange protein -like guanine nucleotide-exchange protein -Bos taurus,PID:g2674107                                            | 253032_at   | -1.4 |
| Expressed protein ; supported by full-length cDNA: Ceres: 22456.                                                                                  | 252823_at   | -1.4 |
| putative LEA protein Picea glauca late embryogenesis abundant protein (EMB8), PID:g1350545;supported by full-length cDNA: Ceres:36702.            | 252132_at   | -1.4 |
| putative protein several hypothetical proteins - Arabidopsis thaliana; supported by cDNA: gi_15010763_gb_AY045683.1_                              | 252098_at   | -1.4 |
| F-box protein family, AtFBL17 contains similarity to F-box protein FBL2 GI:6010699 from [Rattus norvegicus]                                       | 251850_at   | -1.4 |
| putative protein NODULIN-26 - Glycine max, EMBL:X04782; supported by full-length cDNA: Ceres: 32275.                                              | 251661_at   | -1.4 |
| putative protein prib5, Ribes nigrum, EMBL:RNI7578                                                                                                | 251418_at   | -1.4 |
| putative protein hypothetical protein F4118.26 - Arabidopsis thaliana, PIR:T02471;supported by full-length cDNA: Ceres:30454.                     | 251336_at   | -1.4 |
| cysteine synthase AtcysC1 ;supported by full-length cDNA: Ceres:32851.                                                                            | 251322_at   | -1.4 |
| putative protein similar to unknown protein (gb AAD38624.1)                                                                                       | 250586_at   | -1.4 |
| serine-type carboxypeptidase II-like protein carboxypeptidase D - Triticum aestivum, PIR:A29639; supported by cDNA: gi_13877962_gb_AF3702         | 250517_at   | -1.4 |
| beta-xylosidase - like protein beta-xylosidase, Aspergillus nidulans, EMBL:ANXLND; supported by cDNA: gi_15982752_gb_AY057483.1_                  | 250444_at   | -1.4 |
| Glucose-1-phosphate adenylyltransferase (Apl1/adg2) ; supported by cDNA: gi_2149020_gb_U72290.1_ATU72290                                          | 249927_at   | -1.4 |
| histone H2B like protein (emb CAA69025.1)                                                                                                         | 249916_at   | -1.4 |
| putative protein similar to unknown protein (gb AAD29063.1)                                                                                       | 249777_at   | -1.4 |
| putative protein DNA DAMAGE-RESPONSIVE PROTEIN 48, Saccharomyces cerevisiae, EMBL:SCDDR48A; supported by cDNA: gi_16604363.                       | 249416_at   | -1.4 |
| 33 kDa secretory protein-like ; supported by cDNA: gi_15292980_gb_AY050924.1_                                                                     | 248686_at   | -1.4 |
| putative protein similar to unknown protein (gb AAC24386.1)                                                                                       | 248191_at   | -1.4 |
| xyloglucan endo-transglycosylase-like protein ;supported by full-length cDNA: Ceres:12301.                                                        | 247162_at   | -1.4 |
| prolyl 4-hydroxylase, alpha subunit-like protein                                                                                                  | 247124_at   | -1.4 |
| adenylate kinase -like protein adenylate kinase (EC 2.7.4.3), chloroplast, maize, PIR:S45634                                                      | 246651_at   | -1.4 |
| transcriptional co-activator-like protein putative transcriptional co-activator (KIWI) - Arabidopsis thaliana, EMBL:AF053302                      | 245930_at   | -1.4 |

|                                                                                                                                                   |             |      |
|---------------------------------------------------------------------------------------------------------------------------------------------------|-------------|------|
| phosphate/phosphoenolpyruvate translocator - like protein ;supported by full-length cDNA: Ceres:100777.                                           | 245698_at   | -1.4 |
| ras-related small GTP-binding protein RAB1c ; supported by cDNA: gi_15529160_gb_AY052204.1_                                                       | 245299_at   | -1.4 |
| ankyrin like protein ; supported by cDNA: gi_16604604_gb_AY059747.1_                                                                              | 245274_at   | -1.4 |
| PSI P700 apoprotein A2                                                                                                                            | 245006_at   | -1.4 |
| auxin induced protein, putative similar to AUXIN-INDUCED PROTEIN X10A GB:P33080 from [Glycine max]                                                | 257460_at   | -1.4 |
| putative auxin-regulated protein                                                                                                                  | 264016_at   | -1.4 |
| L-aspartate oxidase -like protein L-aspartate oxidase, Pseudomonas aeruginosa, PIR:T46863; supported by cDNA: gi_15010649_gb_AY045626             | 246597_at   | -1.4 |
| putative glutaredoxin ;supported by full-length cDNA: Ceres:39560.                                                                                | 267497_at   | -1.3 |
| glutathione S-transferase identical to GB:D17673; supported by cDNA: gi_443698_dbj_D17673.1_ATHERD13                                              | 267154_at   | -1.3 |
| putative receptor-like protein kinase same as GB:X95909 (polymorphism exists at a GA repeat. We found 6 copies in our sequence whereas only       | 267165_at   | -1.3 |
| hypothetical protein predicted by genscan and genefinder                                                                                          | 266852_at   | -1.3 |
| putative ethylene response element binding protein (EREBP) ;supported by full-length cDNA: Ceres:6397.                                            | 266821_at   | -1.3 |
| putative cytidine deaminase ;supported by full-length cDNA: Ceres:152285.                                                                         | 265943_at   | -1.3 |
| hypothetical protein predicted by genscan;supported by full-length cDNA: Ceres:9149.                                                              | 265823_at   | -1.3 |
| NADC homolog identical to GP 1216074 gnl PID e225599 F20096;supported by full-length cDNA: Ceres:2877.                                            | 265738_at   | -1.3 |
| protein kinase, putative Simisimilar to protein kinase 2 GI:7573598 from [Populus nigra]                                                          | 264240_at   | -1.3 |
| unknown protein ;supported by full-length cDNA: Ceres:15743.                                                                                      | 263985_at   | -1.3 |
| unknown protein ;supported by full-length cDNA: Ceres:36719.                                                                                      | 263796_at   | -1.3 |
| dTDP-glucose 4,6-dehydratase, putative similar to dTDP-glucose 4,6-dehydratase GI:5921157 from [Streptomyces avermitilis]; supported by cD        | 263134_at   | -1.3 |
| receptor kinase (CLV1) identical to receptor kinase (CLV1) GB:AAB58929 GI:2160756 [Arabidopsis thaliana]                                          | 262728_at   | -1.3 |
| unknown protein                                                                                                                                   | 261944_at   | -1.3 |
| transcription factor, putative contains AP2 domain                                                                                                | 261327_at   | -1.3 |
| hypothetical protein predicted by genemark.hmm                                                                                                    | 261177_at   | -1.3 |
| unknown protein ;supported by full-length cDNA: Ceres:41505.                                                                                      | 261105_at   | -1.3 |
| unknown protein contains similarity to UDPG glucosyltransferase GB:AAB62270 GI:2232354 from [Solanum berthaultii];supported by full-length c      | 260955_at   | -1.3 |
| histidine decarboxylase, putative similar to histidine decarboxylase GB:BAA78331 GI:4996105 from [Brassica napus]; supported by cDNA: gi_15       | 260814_at   | -1.3 |
| Expressed protein ; supported by cDNA: gi_15294273_gb_AF410328.1_AF410328                                                                         | 260601_at   | -1.3 |
| polyphosphoinositide binding protein, putative similar to GB:AAB94598 from [Glycine max]; supported by cDNA: gi_16930446_gb_AF419577.1_           | 260604_at   | -1.3 |
| AtHVA22c identical to AtHVA22c GB:AF141661 [Arabidopsis thaliana];supported by full-length cDNA: Ceres:108964.                                    | 260368_at   | -1.3 |
| putative lectin contains Pfam profile: PF01419 jacalin-like lectin domain; similar to jasmonate inducible protein GB:Y11483 (Brassica napus), myr | 259383_at   | -1.3 |
| putative 40S ribosomal protein S17 similar to 40S ribosomal protein S17 GB:AAD50774 [Lycopersicon esculentum];supported by full-length cDNA       | 258922_at   | -1.3 |
| putative UDP-glucose pyrophosphorylase similar to UDP-glucose pyrophosphorylase GB:AAB71613 from [Solanum tuberosum]; supported by cD             | 258849_at   | -1.3 |
| unknown protein ; supported by full-length cDNA: Ceres: 21882.                                                                                    | 258249_s_at | -1.3 |
| protein kinase C-receptor/G-protein, putative similar to uanine nucleotide binding protein (G protein), beta polypeptide GB:NP_006089 [Homo sa]   | 258155_at   | -1.3 |
| hypothetical protein predicted by genefinder;supported by full-length cDNA: Ceres:924.                                                            | 257858_at   | -1.3 |
| unknown protein                                                                                                                                   | 257076_at   | -1.3 |
| Expressed protein ; supported by cDNA: gi_14335055_gb_AY037207.1_                                                                                 | 256766_at   | -1.3 |
| hypothetical protein contains similarity to MtN3(nodulin) protein GB:Y08726 GI:1619601 from [Medicago truncatula]; supported by cDNA: gi_1580     | 256548_at   | -1.3 |
| unknown protein ; supported by cDNA: gi_15293280_gb_AY051074.1_                                                                                   | 256266_at   | -1.3 |
| kinase, putative similar to leaf rust resistance kinase Lr10 GI:1680685 from [Triticum aestivum]                                                  | 255913_at   | -1.3 |
| putative protein RING-H2 finger protein RHA1a, Arabidopsis thaliana,AF078683                                                                      | 255802_s_at | -1.3 |
| 60S ribosomal protein L6, putative similar to 60S ribosomal protein L6 GI:7208784 from [Cicer arietinum];supported by full-length cDNA: Ceres:5'  | 255776_at   | -1.3 |
| putative oxidoreductase                                                                                                                           | 255438_at   | -1.3 |
| putative membrane trafficking factor ;supported by full-length cDNA: Ceres:1463.                                                                  | 255325_at   | -1.3 |

|                                                                                                                                                       |             |      |
|-------------------------------------------------------------------------------------------------------------------------------------------------------|-------------|------|
| putative protein heat shock protein dnaJ - <i>Bacillus stearothermophilus</i> , PIR:JC4739                                                            | 255088_at   | -1.3 |
| putative protein various predicted proteins;supported by full-length cDNA: Ceres:17340.                                                               | 254389_s_at | -1.3 |
| putative protein annexin VII, <i>Dictyostelium discoideum</i> , PIR1:LUDO7                                                                            | 254262_at   | -1.3 |
| putative protein extensin, <i>Catharanthus roseus</i> , D86853                                                                                        | 254093_at   | -1.3 |
| possible apospory-associated like protein <i>Pennisetum ciliare</i> possible apospory-associated mRNA clone pSUB C, PID:g549984;supported by full     | 254040_at   | -1.3 |
| uncharacterized protein ;supported by full-length cDNA: Ceres:7421.                                                                                   | 253989_at   | -1.3 |
| putative Proline synthetase associated protein Proline synthetase associated - <i>Homo sapiens</i> , PID:d1037830;supported by full-length cDNA: Cer  | 253951_at   | -1.3 |
| putative beta-glucosidase beta-glucosidase BGQ60 precursor - barley, PIR2:A57512                                                                      | 253835_at   | -1.3 |
| putative beta-expansin/allergen protein soybean pollen allergen (cim1) protein - soybean, PIR2:S48032;supported by full-length cDNA: Ceres:33         | 253815_at   | -1.3 |
| glucosyltransferase -like protein immediate-early salicylate-induced glucosyltransferase, <i>Nicotiana tabacum</i> , PIR2:T03747;supported by cDNA gi | 253268_s_at | -1.3 |
| caffeoyl-CoA O-methyltransferase - like protein caffeoyl-CoA 3-O-methyltransferase, <i>Populus tremuloides</i> , PID:G857578;supported by full-length | 253276_at   | -1.3 |
| protein kinase - like receptor-like protein kinase RLK3, <i>Arabidopsis thaliana</i> , EMBL:ATH011674                                                 | 252549_at   | -1.3 |
| SF16 -like protein SF16 protein, pollen specific, <i>helianthus annuus</i> , PIR:T13992;supported by full-length cDNA: Ceres:39013.                   | 252280_at   | -1.3 |
| calmodulin-like protein flagellar calmodulin - <i>Naegleria gruberi</i> , PID:g458232; supported by cDNA: gi_166647_gb_L12115.1_ATHCALLGA             | 252136_at   | -1.3 |
| leucoanthocyanidin dioxygenase -like protein leucoanthocyanidin dioxygenase, apple tree, PIR:S33144                                                   | 251770_at   | -1.3 |
| cyclophilin-like protein ROC7, cyclophilin, <i>Arabidopsis thaliana</i> , EMBL:AF192490;supported by full-length cDNA: Ceres:94608.                   | 251772_at   | -1.3 |
| putative protein                                                                                                                                      | 251725_at   | -1.3 |
| putative protein several hypothetical proteins - <i>Arabidopsis thaliana</i> ;supported by full-length cDNA: Ceres:21740.                             | 251107_at   | -1.3 |
| lysine decarboxylase-like protein                                                                                                                     | 250723_at   | -1.3 |
| putative protein prenylated rab acceptor 1 - <i>Homo sapiens</i> , EMBL:AF112202;supported by full-length cDNA: Ceres:22460.                          | 250663_at   | -1.3 |
| putative protein various predicted proteins, <i>Arabidopsis thaliana</i>                                                                              | 250435_at   | -1.3 |
| putative protein                                                                                                                                      | 250330_at   | -1.3 |
| putative protein S-receptor kinase PK3 precursor, maize, PIR:T02753;supported by full-length cDNA: Ceres:154037.                                      | 249983_at   | -1.3 |
| Ser/Thr specific protein kinase - like protein various protein kinase, <i>Arabidopsis thaliana</i> ;supported by full-length cDNA: Ceres:15535.       | 249985_at   | -1.3 |
| putative protein contains similarity to unknown protein (emb CAB89315.1); supported by cDNA: gi_15451067_gb_AY054614.1_                               | 249863_at   | -1.3 |
| 6-phosphogluconolactonase-like protein ;supported by full-length cDNA: Ceres:13806.                                                                   | 249732_at   | -1.3 |
| DNA helicase-like                                                                                                                                     | 249677_at   | -1.3 |
| pyridoxal kinase -like protein pyridoxal kinase, <i>Sus scofra</i> , EMBL:AF041255;supported by full-length cDNA: Ceres:107973.                       | 249589_at   | -1.3 |
| beta-1,3-glucanase-like protein                                                                                                                       | 249214_at   | -1.3 |
| pectin acetyltransferase ;supported by full-length cDNA: Ceres:39005.                                                                                 | 248968_at   | -1.3 |
| unknown protein ; supported by cDNA: gi_14326507_gb_AF385707.1_AF385707                                                                               | 248624_at   | -1.3 |
| receptor protein kinase-like                                                                                                                          | 248568_at   | -1.3 |
| MtN3-like protein ;supported by full-length cDNA: Ceres:36264.                                                                                        | 248467_at   | -1.3 |
| putative protein similar to unknown protein (pir T05049)                                                                                              | 248044_at   | -1.3 |
| calcineurin B-like protein 2 (gb AAC26009.1) ;supported by full-length cDNA: Ceres:37280.                                                             | 248001_at   | -1.3 |
| ubiquinone/menaquinone biosynthesis methyltransferase-like ; supported by cDNA: gi_15293010_gb_AY050939.1_                                            | 247901_at   | -1.3 |
| subtilisin-like serine protease contains similarity to prepro-cucumisin GI:807698 from [Cucumis melo]                                                 | 247760_at   | -1.3 |
| GTP-binding protein - like GTP-binding protein, garden pea, PIR:T06447                                                                                | 247597_at   | -1.3 |
| putative protein similar to unknown protein (emb CAB66910.1);supported by full-length cDNA: Ceres:36946.                                              | 247161_at   | -1.3 |
| putative protein similar to unknown protein (gb AAC18972.1); supported by cDNA: gi_15293188_gb_AY051028.1_                                            | 246998_at   | -1.3 |
| calmodulin-binding - like protein calmodulin-binding protein TCB60, <i>Nicotiana tabacum</i> , EMBL:U58971                                            | 246821_at   | -1.3 |
| cytochrome-b5 reductase - like protein cytochrome-b5 reductase, <i>Saccharomyces cerevisiae</i> , PIR:S37800;supported by full-length cDNA: Ceres:    | 246157_at   | -1.3 |
| amino acid permease, putative almost identical to amino acid permease GI:608673 from [ <i>Arabidopsis thaliana</i> ]                                  | 245740_at   | -1.3 |
| PSI P700 apoprotein A1                                                                                                                                | 245007_at   | -1.3 |

|                                                                                                                                                  |             |      |
|--------------------------------------------------------------------------------------------------------------------------------------------------|-------------|------|
| large subunit of riblose-1,5-bisphosphate carboxylase/oxygenase                                                                                  | 245015_at   | -1.3 |
| Expressed protein ; supported by full-length cDNA: Ceres: 970.                                                                                   | 249721_at   | -1.3 |
| putative protein                                                                                                                                 | 245428_at   | -1.3 |
| unknown protein identical to unknown protein GB:AAF30301 from [Arabidopsis thaliana]; supported by cDNA: gi_16648934_gb_AY059837.1_              | 258472_at   | -1.3 |
| Expressed protein ; supported by cDNA: gi_15724149_gb_AF411777.1_AF411777                                                                        | 267578_at   | -1.2 |
| putative malonyl-CoA:Acyl carrier protein transacylase ;supported by full-length cDNA: Ceres:299.                                                | 267308_at   | -1.2 |
| putative serine carboxypeptidase II ; supported by cDNA: gi_14517521_gb_AY039596.1_                                                              | 267264_at   | -1.2 |
| unknown protein ;supported by full-length cDNA: Ceres:125631.                                                                                    | 267209_at   | -1.2 |
| unknown protein ; supported by cDNA: gi_14334607_gb_AY034977.1_                                                                                  | 267005_at   | -1.2 |
| unknown protein                                                                                                                                  | 266963_at   | -1.2 |
| putative Na <sup>+</sup> -dependent inorganic phosphate cotransporter                                                                            | 266672_at   | -1.2 |
| unknown protein                                                                                                                                  | 266566_at   | -1.2 |
| tubulin beta-7 chain identical to GB:M84704;supported by full-length cDNA: Ceres:17240.                                                          | 266295_at   | -1.2 |
| unknown protein ;supported by full-length cDNA: Ceres:151697.                                                                                    | 266136_at   | -1.2 |
| 60S ribosomal protein L24 ;supported by full-length cDNA: Ceres:14564.                                                                           | 265210_at   | -1.2 |
| unknown protein ; supported by full-length cDNA: Ceres: 5171.                                                                                    | 264343_at   | -1.2 |
| unknown protein                                                                                                                                  | 263878_s_at | -1.2 |
| putative cyclic nucleotide-regulated ion channel protein                                                                                         | 263776_s_at | -1.2 |
| unknown protein Location of EST 228A16T7A, gb N65686;supported by full-length cDNA: Ceres:24946.                                                 | 263688_at   | -1.2 |
| ankyrin-like protein EST gb ATTS0956 comes from this gene;supported by full-length cDNA: Ceres:108617.                                           | 263662_at   | -1.2 |
| unknown protein ;supported by full-length cDNA: Ceres:15081.                                                                                     | 263431_at   | -1.2 |
| unknown protein ; supported by cDNA: gi_13877598_gb_AF370500.1_AF370500                                                                          | 263386_at   | -1.2 |
| unknown protein Strong similarity to gb AF096285 serine-threonine kinase receptor-associated protein from Mus musculus and contains 5 PF 00      | 262597_at   | -1.2 |
| virus resistance protein, putative similar to virus resistance protein GI:558886 from [Nicotiana glutinosa]                                      | 262382_at   | -1.2 |
| hypothetical protein similar to putative curved-DNA binding protein GI:6968662 from [Campylobacter jejuni];supported by full-length cDNA: Ceres: | 262194_at   | -1.2 |
| hypothetical protein predicted by genemark.hmm                                                                                                   | 262151_at   | -1.2 |
| invertase, putative similar to neutral invertase GB:76145 GI:4200165 from [Daucus carota]                                                        | 262038_at   | -1.2 |
| 3-deoxy-D-arabino-heptulosonate 7-phosphate, putative similar to 3-deoxy-D-arabino-heptulosonate 7-phosphate GI:170224 from [Nicotiana tab       | 261933_at   | -1.2 |
| unknown protein                                                                                                                                  | 261175_at   | -1.2 |
| delta 9 desaturase identical to delta 9 desaturase GB:BAA25180 GI:2970034 from [Arabidopsis thaliana]; supported by full-length cDNA: Ceres: 1   | 260957_at   | -1.2 |
| phosphoenolpyruvate carboxylase 1, putative similar to phosphoenolpyruvate carboxylase 1 GI:2266947 from [Gossypium hirsutum]; supported t       | 260590_at   | -1.2 |
| putative villin 2                                                                                                                                | 260521_at   | -1.2 |
| hypothetical protein predicted by genscan+                                                                                                       | 260109_at   | -1.2 |
| putative ABC transporter similar to ABC transporters: GB:BAA77876 [Escherichia coli], GB:P07655 [Escherichia coli]; contains Pfam profile: PF0   | 260002_at   | -1.2 |
| lipase/hydrolase, putative contains Pfam profile: PF00657 Lipase/Acylhydrolase with GDSL-like motif;supported by full-length cDNA: Ceres:6680    | 259786_at   | -1.2 |
| unknown protein contains similarity to cytochrome oxidase I GI:1289267 from (Xantholinus sp.);supported by full-length cDNA: Ceres:6875.         | 259594_at   | -1.2 |
| putative myo-inositol monophosphatase similar to myo-inositol-1(or 4)-monophosphatase 3 (IMP 3) GB:P54928 [Lycopersicon esculentum];supp         | 258613_at   | -1.2 |
| putative s-adenosylmethionine synthetase similar to S-ADENOSYLMETHIONINE SYNTHETASE GB:Q96552 from [Catharanthus roseus];suppor                  | 258415_at   | -1.2 |
| ribosomal protein, putative similar to 60S ribosomal protein L5 GB:P49625 from [Oryza sativa];supported by full-length cDNA: Ceres:32753.        | 257906_at   | -1.2 |
| cytochrome P450, putative contains Pfam profile: PF00067 cytochrome P450                                                                         | 257623_at   | -1.2 |
| cytochrome P450, putative contains Pfam profile: PF00067 cytochrome P450                                                                         | 257628_at   | -1.2 |
| unknown protein ; supported by cDNA: gi_15810494_gb_AY056286.1_                                                                                  | 257071_at   | -1.2 |
| putative protein ;supported by full-length cDNA: Ceres:114734.                                                                                   | 256676_at   | -1.2 |
| 4-coumarate:CoA ligase 1 identical to 4-coumarate:CoA ligase 1 [Arabidopsis thaliana] GI:5702184; supported by cDNA: gi_609339_gb_U18675.        | 256186_at   | -1.2 |



|                                                                                                                                                |             |      |
|------------------------------------------------------------------------------------------------------------------------------------------------|-------------|------|
| Expressed protein ; supported by full-length cDNA: Ceres: 11615.                                                                               | 256091_at   | -1.2 |
| putative serine/threonine protein kinase                                                                                                       | 255488_at   | -1.2 |
| putative sugar transporter                                                                                                                     | 255294_at   | -1.2 |
| putative protein various kinesin light chains;supported by full-length cDNA: Ceres:2538.                                                       | 254951_at   | -1.2 |
| cysteine proteinase contains similarity to cysteine proteinase RD21A (thiol protease) GI:435619, SP:P43297 from [Arabidopsis thaliana]         | 254915_s_at | -1.2 |
| oleoyl-[acyl-carrier-protein] hydrolase-like protein oleoyl-[acyl-carrier-protein] hydrolase - Brassica napus, PIR2:S40407                     | 254798_at   | -1.2 |
| protein ch-42 precursor, chloroplast ;supported by full-length cDNA: Ceres:7501.                                                               | 254623_at   | -1.2 |
| putative protein several hypothetical proteins - Arabidopsis thaliana; supported by cDNA: gi_15320409_dbj_AB039927.1_AB039927                  | 254563_at   | -1.2 |
| tyrosine transaminase like protein tyrosine transaminase (EC 2.6.1.5) - rat, EMBL:X02741; supported by cDNA: gi_15076852_gb_AF268090.1_A       | 254232_at   | -1.2 |
| putative protein other hypothetical proteins Arabidopsis thaliana                                                                              | 254029_at   | -1.2 |
| UDP rhamnose--anthocyanidin-3-glucoside rhamnosyltransferase - like protein UDP rhamnose--anthocyanidin-3-glucoside rhamnosyltransferase       | 253879_s_at | -1.2 |
| putative protein hypothetical protein T25K17.20 - Arabidopsis thaliana,PIR2:T06005; supported by full-length cDNA: Ceres: 7308.                | 253730_at   | -1.2 |
| choline monooxygenase - like protein choline monooxygenase precursor, Spinacia oleracea,gb:U85780                                              | 253701_at   | -1.2 |
| putative protein (fragment) calcineurin B, Naegleria gruberi, gb;U04380                                                                        | 253412_at   | -1.2 |
| putative protein various predicted proteins;supported by full-length cDNA: Ceres:206573.                                                       | 253198_at   | -1.2 |
| cinnamyl-alcohol dehydrogenase CAD1 ;supported by full-length cDNA: Ceres:34593.                                                               | 252943_at   | -1.2 |
| GTP-binding protein Rab11 ; supported by full-length cDNA: Ceres: 35596.                                                                       | 252472_at   | -1.2 |
| putative protein sn-glycerol-3-phosphate permease - Haemophilus influenzae,PID:g3603157; supported by cDNA: gi_13430515_gb_AF360170.1          | 252414_at   | -1.2 |
| hypothetical protein                                                                                                                           | 252403_at   | -1.2 |
| branched-chain-amino-acid transaminase -like protein branched-chain-amino-acid transaminase, Streptomyces coelicolor, PIR:T29053; supporte     | 252274_at   | -1.2 |
| hypothetical protein ;supported by full-length cDNA: Ceres:93591.                                                                              | 252165_at   | -1.2 |
| sedoheptulose-bisphosphatase precursor ; supported by cDNA: gi_15451177_gb_AY054669.1_                                                         | 251762_at   | -1.2 |
| putative protein protein of unknown function - Corydalis sempervirens, EMBL:X63595; supported by cDNA: gi_7684291_dbj_D84226.1_D84226          | 251739_at   | -1.2 |
| URIDYLATE KINASE-like protein URIDYLATE KINASE - Arabidopsis thaliana, EMBL:AF000147;supported by full-length cDNA: Ceres:16800.               | 251426_at   | -1.2 |
| SRG1 - like protein SRG1 protein, Arabidopsis thaliana, PIR:S44261                                                                             | 251402_at   | -1.2 |
| putative protein latex protein allergen Hev b 7 - Hevea brasiliensis, EMBL:AF113546; supported by cDNA: gi_15912226_gb_AY056391.1_             | 251174_at   | -1.2 |
| putative protein HSPC172, Homo sapiens, EMBL:AF161520;supported by full-length cDNA: Ceres:9788.                                               | 250993_at   | -1.2 |
| transcription factor-like protein ethylene responsive element binding factor 5 - Arabidopsis thaliana, EMBL:AB008107; supported by cDNA: gi_15 | 250582_at   | -1.2 |
| putative protein SF21 protein, Helianthus annuus, EMBL: AF189148; supported by cDNA: gi_13605683_gb_AF361823.1_AF361823                        | 250337_at   | -1.2 |
| putative protein contains similarity to unknown protein (pir T05576)                                                                           | 250305_at   | -1.2 |
| GTP-binding protein typA (tyrosine phosphorylated protein A) ; supported by cDNA: gi_16649146_gb_AY059943.1_                                   | 250256_at   | -1.2 |
| unknown protein ; supported by cDNA: gi_14190364_gb_AF378860.1_AF378860                                                                        | 250099_at   | -1.2 |
| putative protein contains similarity to unknown protein (emb CAB62012.1)                                                                       | 249806_at   | -1.2 |
| flavanone 3-hydroxylase-like protein ; supported by full-length cDNA: Ceres: 149654.                                                           | 249754_at   | -1.2 |
| putative protein predicted proteins, Arabidopsis thaliana                                                                                      | 249551_at   | -1.2 |
| acyltransferase -like protein anthocyanin acyltransferase, Perilla frutescens, EMBL:AB029340                                                   | 249489_at   | -1.2 |
| electron transfer flavoprotein beta-subunit-like ;supported by full-length cDNA: Ceres:120707.                                                 | 249158_at   | -1.2 |
| tubulin beta-4 chain (sp P24636) ; supported by cDNA: gi_14334935_gb_AY035141.1_                                                               | 249049_at   | -1.2 |
| GDSL-motif lipase/hydrolase-like protein                                                                                                       | 248921_at   | -1.2 |
| mutT domain protein-like ;supported by full-length cDNA: Ceres:38400.                                                                          | 248793_at   | -1.2 |
| acetyl-CoA C-acetyltransferase ; supported by cDNA: gi_16604582_gb_AY059736.1_                                                                 | 248690_at   | -1.2 |
| putative protein contains similarity to ethylene responsive element binding factor;supported by full-length cDNA: Ceres:2347.                  | 248448_at   | -1.2 |
| putative protein contains similarity to unknown protein (emb CAB87278.1)                                                                       | 248393_at   | -1.2 |
| putative protein similar to unknown protein (pir T04792)                                                                                       | 248085_at   | -1.2 |

|                                                                                                                                                  |             |      |
|--------------------------------------------------------------------------------------------------------------------------------------------------|-------------|------|
| histone H4 - like protein histone H4, Zea mays, PIR:HSZM4;supported by full-length cDNA: Ceres:15418.                                            | 247692_s_at | -1.2 |
| protein disulfide isomerase precursor - like protein disulfide isomerase precursor, Volvox carteri, EMBL:AF110784;supported by full-length cDNA  | 247588_at   | -1.2 |
| ethylene responsive element binding factor - like ethylene responsive element binding factor 5, Arabidopsis thaliana, SWISSPROT:ERF5_ARATI       | 247540_at   | -1.2 |
| 2-oxoglutarate/malate translocator ; supported by cDNA: gi_15810580_gb_AY056329.1_                                                               | 247289_at   | -1.2 |
| zeaxanthin epoxidase precursor ; supported by cDNA: gi_10444087_gb_AF281655.1_AF281655                                                           | 247025_at   | -1.2 |
| putative protein EXOSTOSIN-1 (PUTATIVE TUMOR SUPPRESSOR PROTEIN EXT1) - Homo sapiens, EMBL:S79639                                                | 246682_at   | -1.2 |
| UDP-glucose dehydrogenase-like protein UDP-glucose 6-dehydrogenase - Glycine max, EMBL:U53418; supported by cDNA: gi_15810322_gb_                | 246511_at   | -1.2 |
| hypothetical protein contains similarity to phytoene dehydrogenase (PDH1) GI:433144 from [Cercospora nicotianae]                                 | 246411_at   | -1.2 |
| putative protein 22kDa peroxisomal membrane protein-like - Homo sapiens, EMBL:AF250136;supported by full-length cDNA: Ceres:6789.                | 245937_at   | -1.2 |
| ribonucleoprotein like protein                                                                                                                   | 245605_at   | -1.2 |
| hypothetical protein ;supported by full-length cDNA: Ceres:39922.                                                                                | 245365_at   | -1.2 |
| unknown protein                                                                                                                                  | 257381_at   | -1.2 |
| putative glucanase                                                                                                                               | 267595_at   | -1.1 |
| putative integral membrane protein                                                                                                               | 267520_at   | -1.1 |
| unknown protein ;supported by full-length cDNA: Ceres:8402.                                                                                      | 267370_at   | -1.1 |
| unknown protein ; supported by cDNA: gi_16323164_gb_AY057686.1_                                                                                  | 267084_at   | -1.1 |
| copia-like retroelement pol polyprotein ; supported by full-length cDNA: Ceres: 14718.                                                           | 266696_at   | -1.1 |
| hypothetical protein predicted by genscan;supported by full-length cDNA: Ceres:8450.                                                             | 266311_at   | -1.1 |
| hypothetical protein predicted by genscan                                                                                                        | 266089_at   | -1.1 |
| unknown protein                                                                                                                                  | 265845_at   | -1.1 |
| unknown protein                                                                                                                                  | 265203_at   | -1.1 |
| oligopeptide transporter, putative similar to oligopeptide transporter 1-1 GI:510238 from [Arabidopsis thaliana]                                 | 264736_at   | -1.1 |
| unknown protein contains similarity to peroxidase isozyme GI:217933 from [Armoracia rusticana]                                                   | 264738_at   | -1.1 |
| putative prolyl 4-hydroxylase, alpha subunit ;supported by full-length cDNA: Ceres:36054.                                                        | 264592_at   | -1.1 |
| unknown protein ; supported by cDNA: gi_15450787_gb_AY054474.1_                                                                                  | 263954_at   | -1.1 |
| putative glucosyltransferase ; supported by cDNA: gi_15809993_gb_AY054265.1_                                                                     | 263847_at   | -1.1 |
| malate oxidoreductase (malic enzyme)                                                                                                             | 263717_at   | -1.1 |
| putative auxin-induced protein AUX2-11 Match to Arabidopsis IAA3 (gb U18406). EST gb T04296 comes from this gene; supported by cDNA: gi_!        | 263656_at   | -1.1 |
| putative purple acid phosphatase precursor                                                                                                       | 263553_at   | -1.1 |
| unknown protein similar to hypothetical protein GB:AAB81674;supported by full-length cDNA: Ceres:6280.                                           | 263582_at   | -1.1 |
| putative glucosyltransferase ; supported by full-length cDNA: Ceres: 114997.                                                                     | 263473_at   | -1.1 |
| putative leucine-rich repeat disease resistance protein ;supported by full-length cDNA: Ceres:20900.                                             | 263330_at   | -1.1 |
| coatomer-like protein, epsilon subunit similar to GB:CAB55628 from [Homo sapiens], ESTs gb Z17908, gb AA728673, gb N96555, gb H76335, g          | 263223_at   | -1.1 |
| hypothetical protein similar to putative MADS-box protein GI:4580382 from [Arabidopsis thaliana]                                                 | 262902_x_at | -1.1 |
| glutathione S-transferase, putative similar to similar to glutathione S-transferase GB:AAF29773 GI:6856103 from (Gossypium hirsutum); supporte   | 262916_at   | -1.1 |
| unknown protein ;supported by full-length cDNA: Ceres:95546.                                                                                     | 262396_at   | -1.1 |
| disease resistance protein, putative similar to disease resistance protein GI:9758876 from [Arabidopsis thaliana]                                | 262383_at   | -1.1 |
| unknown protein similar to hypothetical protein GB:AAF24562 GI:6692097 from [Arabidopsis thaliana]; supported by cDNA: gi_15010675_gb_AY(        | 262342_at   | -1.1 |
| unknown protein contains similarity to zinc finger and C2 domain protein GI:9957238 from [Arabidopsis thaliana];supported by full-length cDNA: C | 262314_at   | -1.1 |
| unknown protein identical to unknown protein GB:AAD55492 (Arabidopsis thaliana)                                                                  | 262289_at   | -1.1 |
| somatic embryogenesis receptor-like kinase, putative similar to somatic embryogenesis receptor-like kinase GI:2224910 from [Daucus carota];su    | 262158_at   | -1.1 |
| wall-associated kinase 2, putative similar to receptor-like serine/threonine kinase GB:AAC50043 GI:2465923 from [Arabidopsis thaliana]           | 262082_s_at | -1.1 |
| ARP protein, putative similar to ARP protein GB:CAA89858 GI:886434 from [Arabidopsis thaliana]                                                   | 261601_at   | -1.1 |
| choline kinase, putative similar to CHOLINE/ETHANOLAMINE KINASE GB:Q9Y259 from [Homo sapiens]                                                    | 261506_at   | -1.1 |

|                                                                                                                                                                         |             |      |
|-------------------------------------------------------------------------------------------------------------------------------------------------------------------------|-------------|------|
| hypothetical protein predicted by genemark.hmm;supported by full-length cDNA: Ceres:3200.                                                                               | 261456_at   | -1.1 |
| ferredoxin--NADP reductase precursor, putative similar to GB:M25528 from [Mesembryanthemum crystallinum]                                                                | 261218_at   | -1.1 |
| proliferating cellular nuclear antigen identical to GB:AAF40018 from [Arabidopsis thaliana];supported by full-length cDNA: Ceres:28554.                                 | 261080_at   | -1.1 |
| hypothetical protein similar to hypothetical protein GB:CAB45785 GI:5262156 from [Arabidopsis thaliana];supported by full-length cDNA: Ceres:30737.                     | 261056_at   | -1.1 |
| putative glutathione peroxidase ;supported by full-length cDNA: Ceres:30737.                                                                                            | 260545_at   | -1.1 |
| Expressed protein ; supported by full-length cDNA: Ceres: 14943.                                                                                                        | 259661_at   | -1.1 |
| hypothetical protein ;supported by full-length cDNA: Ceres:265772.                                                                                                      | 259550_at   | -1.1 |
| putative lectin contains Pfam profile: PF01419 jacalin-like lectin domain; similar to jasmonate inducible protein GB:Y11483 (Brassica napus), myr                       | 259381_s_at | -1.1 |
| putative methionine synthase similar to cobalamin-independent methionine synthase GB:AAC50037 [Arabidopsis thaliana];supported by full-length cDNA: Ceres:14291.        | 259343_s_at | -1.1 |
| acyl carrier protein 1 precursor (ACP) identical to GB:P11829 [Arabidopsis thaliana]; supported by full-length cDNA: Ceres: 14291.                                      | 259095_at   | -1.1 |
| putative syntaxin contains Pfam profile: PF00804 syntaxin;supported by full-length cDNA: Ceres:38899.                                                                   | 258786_at   | -1.1 |
| unknown protein ; supported by cDNA: gi_15028124_gb_AY046012.1_                                                                                                         | 258728_at   | -1.1 |
| putative serine carboxypeptidase II similar to serine carboxypeptidase II (CP-MII) GB:CAA70815 [Hordeum vulgare]                                                        | 258633_at   | -1.1 |
| lipamide dehydrogenase precursor identical to GB:AAF34796 from [Arabidopsis thaliana]                                                                                   | 258439_at   | -1.1 |
| unknown protein                                                                                                                                                         | 258419_at   | -1.1 |
| 20S proteasome subunit PAE2 identical to 20S proteasome subunit PAE2 GB:AAC32061 from [Arabidopsis thaliana]; supported by cDNA: gi_342                                 | 258373_at   | -1.1 |
| unknown protein contains GMC oxidoreductase domain; supported by cDNA: gi_13605691_gb_AF361827.1_AF361827                                                               | 258299_at   | -1.1 |
| putative zinc finger protein contains Pfam profile: PF00641 Zn-finger in Ran binding protein and others;supported by full-length cDNA: Ceres:826                        | 258222_at   | -1.1 |
| beta-glucosidase, putative similar to beta-glucosidase BGQ60 precursor GB:A57512 [Hordeum vulgare];supported by full-length cDNA: Ceres:11                              | 258151_at   | -1.1 |
| unknown protein                                                                                                                                                         | 257983_at   | -1.1 |
| hypothetical protein similar to hypothetical protein GB:AAD50054 from [Arabidopsis thaliana]                                                                            | 257964_at   | -1.1 |
| putative UDP-glucose glucosyltransferase similar to GB:Q40284 from [Manihot esculenta]                                                                                  | 257949_at   | -1.1 |
| unknown protein                                                                                                                                                         | 257828_at   | -1.1 |
| hypothetical protein predicted by genscan+;supported by full-length cDNA: Ceres:4146.                                                                                   | 256796_at   | -1.1 |
| unknown protein ;supported by full-length cDNA: Ceres:8544.                                                                                                             | 256785_at   | -1.1 |
| UDP-glucose dehydrogenase, putative UDP-glucose 6-dehydrogenase (UDPGDH) GB:Q96558 from [Glycine max];supported by full-length cDNA: Ceres:14577.                       | 256745_at   | -1.1 |
| hypothetical protein ; supported by full-length cDNA: Ceres: 14577.                                                                                                     | 256569_at   | -1.1 |
| protein kinase, putative contains Pfam profile: PF00069: Eukaryotic protein kinase domain                                                                               | 256529_at   | -1.1 |
| protein kinase, putative contains Pfam profile: PF00069: Eukaryotic protein kinase domain                                                                               | 256482_at   | -1.1 |
| unknown protein                                                                                                                                                         | 255852_at   | -1.1 |
| unknown protein ; supported by cDNA: gi_15293076_gb_AY050972.1_                                                                                                         | 255827_at   | -1.1 |
| sulfate adenyltransferase identical to sulfate adenyltransferase GI:487404 from [Arabidopsis thaliana];supported by full-length cDNA: Ceres:21                          | 255785_at   | -1.1 |
| unknown protein                                                                                                                                                         | 255764_at   | -1.1 |
| unknown protein ;supported by full-length cDNA: Ceres:37302.                                                                                                            | 255719_at   | -1.1 |
| contains similarity to a protein kinase domain (Pfam: pkinase.hmm, score: 165.48), to legume lectins beta domain (Pfam: lectin_legB.hmm, score                          | 255503_at   | -1.1 |
| nodulin-like protein nodulin gene MtN21 - Medicago truncatula, PID:e1172471;supported by full-length cDNA: Ceres:40485.                                                 | 255129_at   | -1.1 |
| putative mitogen-activated protein kinase                                                                                                                               | 255148_at   | -1.1 |
| putative protein ascorbate peroxidase - Spinacia oleracea,PIR2:S66265;supported by full-length cDNA: Ceres:37435.                                                       | 255078_at   | -1.1 |
| flavonoid 3,5-hydroxylase -like protein flavonoid 3,5 -hydroxylase - Campanula medium, PID:d1003951                                                                     | 254835_s_at | -1.1 |
| pEARLI 1-like protein Arabidopsis thaliana pEARLI 1 mRNA, PID:g871780; supported by cDNA: gi_15450470_gb_AY052336.1_                                                    | 254832_at   | -1.1 |
| hypothetical protein                                                                                                                                                    | 254484_at   | -1.1 |
| adenine phosphoribosyltransferase (EC 2.4.2.7) - like protein adenine phosphoribosyltransferase, Triticum aestivum, T06263; supported by full-length cDNA: Ceres:14577. | 254328_at   | -1.1 |
| glucose-6-phosphate isomerase glucose-6-phosphate isomerase Spinacia oleracea (spinach), PATX:E1315197                                                                  | 254141_at   | -1.1 |
| fructose-bisphosphate aldolase - like protein fructose-bisphosphate aldolase, Arabidopsis thaliana, PIR1:ADMU;supported by full-length cDNA: C                          | 253971_at   | -1.1 |

|                                                                                                                                              |           |      |
|----------------------------------------------------------------------------------------------------------------------------------------------|-----------|------|
| hypothetical protein ;supported by full-length cDNA: Ceres:36080.                                                                            | 253765_at | -1.1 |
| MAP kinase kinase 2 ; supported by cDNA: gi_14326470_gb_AF385688.1_AF385688                                                                  | 253646_at | -1.1 |
| putative cyclase associated protein CAP adenylyl cyclase-associated protein CAP2, Rattus norvegicus, PIR2:JC4386; supported by cDNA: gi_31   | 253205_at | -1.1 |
| putative protein ;supported by full-length cDNA: Ceres:265.                                                                                  | 253172_at | -1.1 |
| calmodulin-domain protein kinase CDPK isoform 5 (CPK5) ; supported by cDNA: gi_1399272_gb_U31834.1_ATU31834                                  | 253167_at | -1.1 |
| nuclear envelope membrane protein - like LBR integral nuclear envelope inner membrane protein, Homo sapiens, EMBL:HSLBR10; supported by      | 251995_at | -1.1 |
| phenylalanine ammonia-lyase ;supported by full-length cDNA: Ceres:110886.                                                                    | 251984_at | -1.1 |
| putative protein 24 kDa seed maturation protein, Glycine max., EMBL:AF004806                                                                 | 251903_at | -1.1 |
| Expressed protein ; supported by cDNA: gi_11494366_gb_AF280059.1_AF280059                                                                    | 251816_at | -1.1 |
| putative protein hypothetical protein At2g41330 - Arabidopsis thaliana, EMBL:AC005662; supported by cDNA: gi_15451041_gb_AY054601.1_         | 251663_at | -1.1 |
| CP12 protein precursor-like protein CP12 protein precursor, chloroplast - Pisum sativum,PIR:T06562;supported by full-length cDNA: Ceres:2721 | 251218_at | -1.1 |
| tRNA isopentenyl transferase -like protein tRNA isopentenyl transferase, Arabidopsis thaliana, EMBL:AF109376; supported by cDNA: gi_142789   | 251154_at | -1.1 |
| serine/threonine protein kinase ATPK10 ; supported by cDNA: gi_13249133_gb_AF302111.1_AF302111                                               | 251059_at | -1.1 |
| putative protein ; supported by cDNA: gi_2723476_dbj_D89824.1_D89824                                                                         | 250901_at | -1.1 |
| Expressed protein ; supported by cDNA: gi_9909197_gb_AF175769.1_AF175769                                                                     | 250818_at | -1.1 |
| polygalacturonase inhibiting protein ;supported by full-length cDNA: Ceres:35527.                                                            | 250669_at | -1.1 |
| GTP-binding protein LepA homolog                                                                                                             | 250531_at | -1.1 |
| sulfate transporter ; supported by cDNA: gi_2114105_dbj_AB003591.1_AB003591                                                                  | 250475_at | -1.1 |
| putative protein KIAA0255 gene, Homo sapiens, EMBL:HSD444                                                                                    | 250422_at | -1.1 |
| 24-sterol C-methyltransferase ; supported by cDNA: gi_11066104_gb_AF195648.1_AF195648                                                        | 250254_at | -1.1 |
| unknown protein                                                                                                                              | 249932_at | -1.1 |
| 60S ribosomal protein L10A ; supported by cDNA: gi_14335147_gb_AY037253.1_                                                                   | 249945_at | -1.1 |
| putative protein similar to unknown protein (pir T40675); supported by cDNA: gi_14335067_gb_AY037213.1_                                      | 249701_at | -1.1 |
| putative protein vanilloid receptor gene, CTNS, Homo sapiens, EMBL:AF168787;supported by full-length cDNA: Ceres:18435.                      | 249373_at | -1.1 |
| serine carboxypeptidase II-like ; supported by cDNA: gi_13605556_gb_AF361604.1_AF361604                                                      | 249216_at | -1.1 |
| antifungal protein-like (PDF1.2)                                                                                                             | 249052_at | -1.1 |
| putative protein similar to unknown protein (gb AAF24540.1);supported by full-length cDNA: Ceres:141753.                                     | 248923_at | -1.1 |
| bHLH protein-like                                                                                                                            | 248864_at | -1.1 |
| FRO1 and FRO2-like protein                                                                                                                   | 248540_at | -1.1 |
| putative protein similar to unknown protein (pir T02891);supported by full-length cDNA: Ceres:112574.                                        | 248271_at | -1.1 |
| glucose-6-phosphate/phosphate translocator ;supported by full-length cDNA: Ceres:26107.                                                      | 248144_at | -1.1 |
| MYB27 protein - like MYB27 protein, Arabidopsis thaliana, PIR:T46166; supported by cDNA: gi_3941479_gb_AF062894.1_AF062894                   | 247696_at | -1.1 |
| S-receptor kinase homolog 2 precursor S-receptor kinase homolog 2 precursor, Arabidopsis thaliana, PIR:S27754                                | 247602_at | -1.1 |
| 100 kDa coactivator - like protein 100 kDa coactivator, Homo sapiens, PIR:I38968                                                             | 247517_at | -1.1 |
| putative protein                                                                                                                             | 247486_at | -1.1 |
| peptide transporter                                                                                                                          | 247440_at | -1.1 |
| putative protein similar to unknown protein (pir T04031); supported by full-length cDNA: Ceres: 144066.                                      | 247255_at | -1.1 |
| annexin ;supported by full-length cDNA: Ceres:1728.                                                                                          | 247210_at | -1.1 |
| leucine-rich repeats containing protein grr1 - Glycine max. EMBL:AF019910                                                                    | 246935_at | -1.1 |
| putative protein various predicted proteins, Arabidopsis thaliana;supported by full-length cDNA: Ceres:28528.                                | 246860_at | -1.1 |
| putative protein predicted protein, Arabidopsis thaliana; supported by cDNA: gi_16930704_gb_AF436836.1_AF436836                              | 246660_at | -1.1 |
| cytochrome P450 ; supported by cDNA: gi_3164141_dbj_D78606.1_D78606                                                                          | 246620_at | -1.1 |
| beta-D-glucan exohydrolase - like protein beta-D-glucan exohydrolase, Nicotiana tabacum, EMBL:AB017502                                       | 246184_at | -1.1 |
| succinyl-CoA-ligase alpha subunit ;supported by full-length cDNA: Ceres:10292.                                                               | 246035_at | -1.1 |

|                                                                                                                                                              |             |      |
|--------------------------------------------------------------------------------------------------------------------------------------------------------------|-------------|------|
| disease resistance RPP5 like protein (fragment)                                                                                                              | 245460_at   | -1.1 |
| F12A21.7 hypothetical protein;supported by full-length cDNA: Ceres:34552.                                                                                    | 245197_at   | -1.1 |
| putative mitochondrial carrier protein similar to SP:P40556:YIA6_YEAST and SP:P39953:YEA6_YEAST;supported by full-length cDNA: Ceres:12                      | 245152_at   | -1.1 |
| S-like ribonuclease RNS2 identical to ribonuclease 2 precursor SP:P42814, GI:289210; contains a ribonuclease T2 family histidine active site sig             | 245067_at   | -1.1 |
| ATP-dependent protease subunit                                                                                                                               | 244971_at   | -1.1 |
| putative calcium ATPase very similar to fruit fly Ca <sup>2+</sup> -transporting ATPase, gi 114306 and fast skeletal muscle Ca-ATPase [Rana esculenta], gi 2 | 264526_at   | -1.1 |
| Expressed protein ; supported by cDNA: gi_13605516_gb_AF361584.1_AF361584                                                                                    | 265597_at   | -1.1 |
| putative protein putative protein - Arabidopsis thaliana, EMBL:CAB36749.1                                                                                    | 252335_at   | -1.1 |
| flavanone 3-hydroxylase (FH3) ;supported by full-length cDNA: Ceres:36653.                                                                                   | 252123_at   | -1.1 |
| unknown protein similar to GP 2245012 gn PID e327000 Z97341; supported by cDNA: gi_15293230_gb_AY051049.1_                                                   | 267592_at   | -1   |
| hypothetical protein predicted by genfinder                                                                                                                  | 267586_at   | -1   |
| putative beta-galactosidase ; supported by cDNA: gi_14517398_gb_AY039534.1_                                                                                  | 267556_at   | -1   |
| unknown protein                                                                                                                                              | 267517_at   | -1   |
| unknown protein                                                                                                                                              | 267230_at   | -1   |
| high affinity Ca <sup>2+</sup> antiporter identical to GB:U57411, except a possible frameshift at base 58008. Sequence has been confirmed with 5 sequenci    | 267093_at   | -1   |
| calmodulin-like protein identical to GB:D45848; supported by cDNA: gi_15983405_gb_AF424577.1_AF424577                                                        | 267083_at   | -1   |
| hypothetical protein ;supported by full-length cDNA: Ceres:38891.                                                                                            | 266805_at   | -1   |
| unknown protein                                                                                                                                              | 266572_at   | -1   |
| putative dioxygenase ; supported by cDNA: gi_15292706_gb_AY050787.1_                                                                                         | 265615_at   | -1   |
| nodulin-like protein                                                                                                                                         | 265414_at   | -1   |
| unknown protein                                                                                                                                              | 265327_at   | -1   |
| putative 3-oxoacyl [acyl-carrier protein] reductase similar to proteins from several bacterial species, similar to ESTs emb Z37189, gb H74525, gb            | 265026_at   | -1   |
| unknown protein similar to F5J6.8 and C. elegans C42D8.3;supported by full-length cDNA: Ceres:2578.                                                          | 264850_at   | -1   |
| pyruvate dehydrogenase E1 alpha subunit strongly similar to GB:AAD39331;supported by full-length cDNA: Ceres:41337.                                          | 264871_at   | -1   |
| hypothetical protein similar to hypothetical protein GI:4455225 from [Arabidopsis thaliana]; supported by cDNA: gi_15293160_gb_AY051014.1_                   | 264701_at   | -1   |
| unknown protein ;supported by full-length cDNA: Ceres:2935.                                                                                                  | 264609_at   | -1   |
| Expressed protein ; supported by full-length cDNA: Ceres: 108558.                                                                                            | 264579_at   | -1   |
| putative lipase Similar to nodulins and lipase; location of EST E6C2T7 , gb AA042309. similar to nodulins gi 3328240, gi 2129854 and others and              | 264501_at   | -1   |
| ATPase 70 kDa subunit, putative similar to ATPase 70 kDa subunit GI:558478 from [Brassica napus];supported by full-length cDNA: Ceres:1781                   | 264302_at   | -1   |
| putative steroid sulfotransferase ;supported by full-length cDNA: Ceres:3964.                                                                                | 264037_at   | -1   |
| unknown protein ;supported by full-length cDNA: Ceres:109103.                                                                                                | 263919_at   | -1   |
| putative ribonucleoside-diphosphate reductase large subunit ; supported by cDNA: gi_14334813_gb_AY035080.1_                                                  | 263882_at   | -1   |
| phenylalanine ammonia lyase (PAL1) ; supported by cDNA: gi_15028192_gb_AY045919.1_                                                                           | 263845_at   | -1   |
| 3-methyladenine DNA glycosylase, putative Strong similarity to GB:P29102, 3-isopropylmalate dehydrogenase (IMDH) from Brassica napus. ES                     | 263706_s_at | -1   |
| putative 1-aminocyclopropane-1-carboxylate oxidase Similar to Arabidopsis 2A6 (gb X83096). EST gb T76913 comes from this gene; supported b                   | 263668_at   | -1   |
| putative myo-inositol 1-phosphate synthase ; supported by cDNA: gi_15450746_gb_AY053415.1_                                                                   | 263433_at   | -1   |
| fructokinase, putative predicted by genfinder                                                                                                                | 263163_at   | -1   |
| putative N-acetylglucosaminyltransferase                                                                                                                     | 263105_at   | -1   |
| unknown protein ESTs gb R65381 and gb T44635 come from this gene                                                                                             | 262811_at   | -1   |
| anter-specific proline-rich -like protein (APG-like) similar to anter-specific proline-rich protein (APG) SP:P40602 [Arabidopsis thaliana (Mouse-ear         | 262682_at   | -1   |
| unknown protein                                                                                                                                              | 262694_at   | -1   |
| hypothetical protein similar to hypothetical protein GB:CAB36801 GI:4455265 from [Arabidopsis thaliana]; supported by full-length cDNA: Ceres: 4             | 262457_at   | -1   |
| unknown protein                                                                                                                                              | 262432_at   | -1   |
| hypothetical protein predicted by genemark.hmm                                                                                                               | 262089_s_at | -1   |

|                                                                                                                                                          |           |    |
|----------------------------------------------------------------------------------------------------------------------------------------------------------|-----------|----|
| isocitrate dehydrogenase, putative similar to isocitrate dehydrogenase GI:166385 from [ <i>Medicago sativa</i> ];supported by full-length cDNA: Ceres:4  | 261920_at | -1 |
| GTP-binding protein, putative similar to GTP-binding protein NGB GB:AAD09830 GI:4191616 from [ <i>Homo sapiens</i> ]                                     | 261882_at | -1 |
| unknown protein similar to hypothetical protein GB:AAF22901 GI:6664319 from [ <i>Arabidopsis thaliana</i> ]; supported by cDNA: gi_16930480_gb_AF4       | 261696_at | -1 |
| metallothionein-like protein identical to SP:P43392 from ( <i>Arabidopsis thaliana</i> );supported by full-length cDNA: Ceres:12642.                     | 261410_at | -1 |
| hypothetical protein predicted by genemark.hmm; supported by full-length cDNA: Ceres: 13874.                                                             | 261057_at | -1 |
| hypothetical protein similar to Pto kinase interactor 1 GB:AAC61805 GI:3668069 from [ <i>Lycopersicon esculentum</i> ]                                   | 260924_at | -1 |
| putative FKBP type peptidyl-prolyl cis-trans isomerase                                                                                                   | 260542_at | -1 |
| unknown protein ;supported by full-length cDNA: Ceres:17921.                                                                                             | 260441_at | -1 |
| sucrose transport protein SUC1 identical to GB:S38197 from [ <i>Arabidopsis thaliana</i> ]; supported by cDNA: gi_15146267_gb_AY049275.1_                | 260143_at | -1 |
| hypothetical protein similar to Yml014wp GB:NP_013698 from [ <i>Saccharomyces cerevisiae</i> ];supported by full-length cDNA: Ceres:34418.               | 260128_at | -1 |
| unknown protein ; supported by full-length cDNA: Ceres: 123862.                                                                                          | 259981_at | -1 |
| short chain alcohol dehydrogenase, putative similar to GI:2739279 from [ <i>Nicotiana tabacum</i> ] (Plant Mol. Biol. 29 (5), 1027-1038 (1995))          | 259669_at | -1 |
| GTP-binding protein RAB7D, putative similar to GI:1370187 from [ <i>Lotus japonicus</i> ] (Plant J. 11 (2), 237-250 (1997)); supported by cDNA: gi_157   | 259611_at | -1 |
| type 2A protein serine/threonine phosphatase 55 kDa B regulatory subunit almost identical to type 2A protein serine/threonine phosphatase 55 kD          | 259404_at | -1 |
| unknown protein ; supported by cDNA: gi_16648950_gb_AY059845.1_                                                                                          | 259166_at | -1 |
| threonine dehydratase/deaminase (OMR1) identical to threonine dehydratase/deaminase (OMR1) GB:AAC97936, GB:AF096281 [ <i>Arabidopsis th</i>              | 258884_at | -1 |
| unknown protein                                                                                                                                          | 258897_at | -1 |
| unknown protein ; supported by cDNA: gi_15294217_gb_AF410300.1_AF410300                                                                                  | 258839_at | -1 |
| unknown protein similar to putative protein GB:CAB38214 [ <i>Arabidopsis thaliana</i> ];supported by full-length cDNA: Ceres:6052.                       | 258811_at | -1 |
| putative pectate lyase simliar to pectate lyase precursor GB:P40972 from [ <i>Nicotiana tabacum</i> ]                                                    | 258719_at | -1 |
| putative ribosomal-protein S6 kinase (ATPK6) identical to putative ribosomal-protein S6 kinase (ATPK6) GB:D42056 [ <i>Arabidopsis thaliana</i> ] (FEB:   | 258677_at | -1 |
| putative adenosine kinase similar to adenosine kinase GB:CAB40376 [ <i>Zea mays</i> ]; supported by cDNA: gi_12017761_gb_AF180894.1_AF180894             | 258658_at | -1 |
| putative S-adenosylmethionine:2-demethylmenaquinone methyltransferase similar to S-adenosylmethionine:2-demethylmenaquinone methyltrans                  | 258614_at | -1 |
| putative aspartyl protease contains Pfam profile: PF00026 Eukaryotic aspartyl protease;supported by full-length cDNA: Ceres:40409.                       | 258615_at | -1 |
| hypothetical protein contains similarity to 50S ribosomal protein L12-C, chloroplast precursor GB:P36212 from [ <i>Arabidopsis thaliana</i> ]            | 258466_at | -1 |
| putative chlorophyll A-B binding protein similar to chlorophyll A-B binding protein 151 precursor (LHCP) GB:P27518 from [ <i>Gossypium hirsutum</i> ];su | 258239_at | -1 |
| hypothetical protein                                                                                                                                     | 258245_at | -1 |
| receptor kinase, putative similar to receptor kinase GB:AAA33715 from [ <i>Petunia integrifolia</i> ];supported by full-length cDNA: Ceres:22221.        | 258159_at | -1 |
| ubiquitin-specific protease 7 (UBP7), putative similar to GI:11993467; supported by cDNA: gi_11993466_gb_AF302661.1_AF302661                             | 258045_at | -1 |
| AIG2-like protein similar to AIG2 protein GB:P54121 from [ <i>Arabidopsis thaliana</i> ];supported by full-length cDNA: Ceres:5137.                      | 258000_at | -1 |
| unknown protein ; supported by full-length cDNA: Ceres: 92670.                                                                                           | 257755_at | -1 |
| histone H3, putative similar to histone H3 GB:P05203 [ <i>Petroselinum crispum</i> ]; supported by cDNA: gi_14335141_gb_AY037250.1_                      | 257714_at | -1 |
| unknown protein contains similarity to auxin-induced protein GB:P33082 from [ <i>Glycine max</i> ]                                                       | 257690_at | -1 |
| unknown protein ;supported by full-length cDNA: Ceres:17362.                                                                                             | 257676_at | -1 |
| Expressed protein ; supported by full-length cDNA: Ceres: 11616.                                                                                         | 257204_at | -1 |
| hypothetical protein predicted by genemark.hmm                                                                                                           | 256741_at | -1 |
| unknown protein ; supported by cDNA: gi_14423501_gb_AF386988.1_AF386988                                                                                  | 256115_at | -1 |
| unknown protein                                                                                                                                          | 256100_at | -1 |
| GDP-L-fucose synthetase, putative similar to GDP-L-fucose synthetase GI:6580725 from [ <i>Yersinia pseudotuberculosis</i> ];supported by full-length c   | 255901_at | -1 |
| unknown protein contains similarity to chlorophyllase GI:7415999 from [ <i>Chenopodium album</i> ]; supported by full-length cDNA: Ceres: 31589.         | 255786_at | -1 |
| hypothetical protein predicted by genscan+;supported by full-length cDNA: Ceres:232413.                                                                  | 255775_at | -1 |
| hypothetical protein                                                                                                                                     | 255604_at | -1 |
| protoporphyrinogen oxidase ; supported by cDNA: gi_14423413_gb_AF386944.1_AF386944                                                                       | 255537_at | -1 |
| PROLIFERA similar to <i>S. cerevisiae</i> MCM2-3-5 genes required for the initiation of DNA replication; supported by cDNA: gi_675490_gb_L39954.1.       | 255513_at | -1 |

|                                                                                                                                                |             |    |
|------------------------------------------------------------------------------------------------------------------------------------------------|-------------|----|
| 5-adenylylsulfate reductase ;supported by full-length cDNA: Ceres:40330.                                                                       | 255284_at   | -1 |
| coded for by A. thaliana cDNA Z18000 ;supported by full-length cDNA: Ceres:38543.                                                              | 255240_at   | -1 |
| putative trehalose-6-phosphate phosphatase (AtTPPA) trehalose-6-phosphate phosphatase - Arabidopsis thaliana, PID:g2944178; supported by       | 254806_at   | -1 |
| putative protein predicted protein, Arabidopsis thaliana; supported by full-length cDNA: Ceres: 112156.                                        | 254722_at   | -1 |
| bHLH protein - like bHLH protein, Arabidopsis thaliana, PATCHX:E255557                                                                         | 254693_at   | -1 |
| putative protein predicted protein, Arabidopsis thaliana, PATCHX:E327449                                                                       | 254701_at   | -1 |
| putative protein similar to unknown protein (gb AAC79139.1)                                                                                    | 254521_at   | -1 |
| putative protein storage protein - Populus deltoides, PIR2:S31580                                                                              | 254150_at   | -1 |
| putative protein ; supported by cDNA: gi_15810138_gb_AY056134.1_                                                                               | 253922_at   | -1 |
| putative receptor protein kinase receptor protein kinase, Ipomoea trifida,PID:g836954                                                          | 253911_at   | -1 |
| hypothetical protein ;supported by full-length cDNA: Ceres:18040.                                                                              | 253817_at   | -1 |
| nucleotide pyrophosphatase -like protein nucleotide pyrophosphatase, Oryza sativa, gb:T03293; supported by cDNA: gi_13430713_gb_AF36026        | 253697_at   | -1 |
| EST GB:N37377 spans last intron and 3' end of gene contains similarity to meiotic serine proteinase TMP GI:6468325 from [Lycopersicon escul    | 253650_at   | -1 |
| putative protein diacylglycerol kinase iota - Homo sapiens,PID:g3676530; supported by cDNA: gi_13430523_gb_AF360174.1_AF360174                 | 253578_at   | -1 |
| putative protein ENOD16, Medicago truncatula, X99466;supported by full-length cDNA: Ceres:6308.                                                | 253480_at   | -1 |
| putative protein predicted protein, Synechocystis sp., PIR2:S74814; supported by cDNA: gi_14334011_gb_AF302188.1_AF302188                      | 253394_at   | -1 |
| P-Protein - like protein P-Protein precursor, Solanum tuberosum, gb:Z99770; supported by cDNA: gi_14596024_gb_AY042800.1_                      | 253387_at   | -1 |
| putative protein dihydrokaempferol 4-reductase (EC 1.1.1.219) -Synechocystis, PIR2:S75325; supported by cDNA: gi_13926212_gb_AF370578.         | 253334_at   | -1 |
| ankyrin repeat-containing protein 2 ;supported by full-length cDNA: Ceres:34698.                                                               | 253139_at   | -1 |
| phosphoserine aminotransferase ;supported by full-length cDNA: Ceres:34272.                                                                    | 253162_at   | -1 |
| cytoplasmatic aconitate hydratase (citrate hydro-lyase)(aconitase)(EC 4.2.1.3)                                                                 | 253135_at   | -1 |
| putative protein F35D11.3, Caenorhabditis elegans, PATX:G868225                                                                                | 253081_at   | -1 |
| putative protein other predicted proteins Arabidopsis thaliana                                                                                 | 253059_s_at | -1 |
| vacuolar H(+)-ATPase subunit-like protein Vacuolar proton pump subunit SFD alpha isoform - Homo sapiens, EMBL:AF112204; supported by cD        | 252845_at   | -1 |
| disease resistance protein homolog disease resistance protein RPP1-WsB - Arabidopsis thaliana, EMBL:AF098963                                   | 252648_at   | -1 |
| lipoygenase AtLOX2 ; supported by cDNA: gi_431257_gb_L23968.1_ATHATLO                                                                          | 252618_at   | -1 |
| chloroplast NAD-dependent malate dehydrogenase ; supported by cDNA: gi_3256065_emb_Y13987.1_ATMDH                                              | 252407_at   | -1 |
| hypothetical protein                                                                                                                           | 252361_at   | -1 |
| receptor protein kinase - like protein CLAVATA1 receptor kinase, Arabidopsis thaliana, EMBL:ATU96879                                           | 252272_at   | -1 |
| putative calmodulin calmodulin - Tetrahymena pyriformis (SGC5),PIR1:MCTE; supported by cDNA: gi_14190470_gb_AF380635.1_AF380635                | 252037_at   | -1 |
| inorganic pyrophosphatase -like protein inorganic pyrophosphatase, Solanum tuberosum, PIR:T07399;supported by full-length cDNA: Ceres:401      | 251961_at   | -1 |
| synaptobrevin -like protein vesicle-associated membrane protein 7B (At VAMP7B), Arabidopsis thaliana, EMBL:AF025333                            | 251877_at   | -1 |
| nucleoid DNA-binding - like protein nucleoid DNA-binding protein cnd41, chloroplast, common tobacco, PIR:T01996; supported by full-length cD†  | 251899_at   | -1 |
| tryptophan synthase alpha chain ; supported by full-length cDNA: Ceres: 40110.                                                                 | 251847_at   | -1 |
| putative protein                                                                                                                               | 251727_at   | -1 |
| DNA-binding protein-like DNA-binding protein 4 WRKY4 - Nicotiana tabacum, EMBL:AF193771;supported by full-length cDNA: Ceres:34847.            | 251705_at   | -1 |
| glutathione peroxidase -like protein phospholipid-hydroperoxide glutathione peroxidase, spinach, PIR:JC5619;supported by full-length cDNA: Cei | 251205_at   | -1 |
| putative protein outer envelope membrane protein E 6.7 - chloroplast Spinacia oleracea, PIR:A35958; supported by cDNA: gi_15724349_gb_AF       | 251155_at   | -1 |
| putative protein rmgB protein, Dictyostelium discoideum, PIR:S68824; supported by cDNA: gi_15724205_gb_AF412043.1_AF412043                     | 250851_at   | -1 |
| putative protein hypothetical proteins - Arabidopsis thaliana;supported by full-length cDNA: Ceres:12022.                                      | 250618_at   | -1 |
| pyruvate kinase                                                                                                                                | 250526_at   | -1 |
| putative protein similar to unknown protein (pir S75227);supported by full-length cDNA: Ceres:22.                                              | 249524_at   | -1 |
| DegP protease contains similarity to DegP protease precursor GI:2565436 from [Arabidopsis thaliana]                                            | 249421_at   | -1 |
| putative protein similar to unknown protein (emb CAB53482.1)                                                                                   | 249167_at   | -1 |

|                                                                                                                                              |             |      |
|----------------------------------------------------------------------------------------------------------------------------------------------|-------------|------|
| serine/threonine-protein kinase Mak (male germ cell-associated kinase)-like protein ; supported by cDNA: gi_15450859_gb_AY054510.1_          | 248953_at   | -1   |
| magnesium chelatase subunit of protochlorophyllide reductase non-consensus AA donor splice site at exon 1, TG acceptor splice site at exon 2 | 248920_at   | -1   |
| carnitine/acylcarnitine translocase-like protein ;supported by full-length cDNA: Ceres:13730.                                                | 248838_at   | -1   |
| ras-related small GTP-binding protein-like ;supported by full-length cDNA: Ceres:1492.                                                       | 248792_at   | -1   |
| ethylene responsive element binding factor 2 (ATERF2) (sp O80338) ;supported by full-length cDNA: Ceres:3012.                                | 248794_at   | -1   |
| cyclin C-like protein ;supported by full-length cDNA: Ceres:2036.                                                                            | 248666_at   | -1   |
| putative protein similar to unknown protein (gb AAF63814.1);supported by full-length cDNA: Ceres:40718.                                      | 248623_at   | -1   |
| fumarate hydratase ; supported by cDNA: gi_15529146_gb_AY052197.1_                                                                           | 248461_s_at | -1   |
| unknown protein                                                                                                                              | 248068_at   | -1   |
| bis(5'-adenosyl)-triphosphatase-like; also similar to fragile histidine triad                                                                | 247860_at   | -1   |
| putative protein strong similarity to unknown protein (gb AAD55298.1); supported by cDNA: gi_14423505_gb_AF386990.1_AF386990                 | 247444_at   | -1   |
| GTP cyclohydrolase II; 3,4-dihydroxy-2-butanone-4-phosphate synthase (emb CAA03884.1) supported by cDNA: gi_940382_dbj_D45165.1_ATH          | 247272_at   | -1   |
| unknown protein                                                                                                                              | 246989_at   | -1   |
| putative protein hypothetical protein Sb07 - Picea mariana, EMBL:AF051204                                                                    | 246936_at   | -1   |
| copper amine oxidase, putative similar to copper amine oxidase GI:3819099 from [Cicer arietinum]                                             | 246603_at   | -1   |
| putative protein predicted proteins - Arabidopsis thaliana;supported by full-length cDNA: Ceres:34944.                                       | 246452_at   | -1   |
| 4-alpha-glucanotransferase                                                                                                                   | 245094_at   | -1   |
| PSI 9KDa protein                                                                                                                             | 244932_at   | -1   |
| NADH dehydrogenase subunit                                                                                                                   | 244935_at   | -1   |
| unknown protein                                                                                                                              | 267401_at   | -1   |
| putative tropinone reductase ;supported by full-length cDNA: Ceres:14555.                                                                    | 266292_at   | -1   |
| arginine methyltransferase-like protein                                                                                                      | 248633_at   | -1   |
| Expressed protein ; supported by full-length cDNA: Ceres: 9573.                                                                              | 258848_at   | -1   |
| glucose-6-phosphate dehydrogenase                                                                                                            | 249372_at   | -1   |
| putative receptor-like protein kinase ; supported by cDNA: gi_15292872_gb_AY050870.1_                                                        | 267619_at   | -0.9 |
| putative C2H2-type zinc finger protein likely a nucleic acid binding protein; supported by cDNA: gi_14517523_gb_AY039597.1_                  | 267535_at   | -0.9 |
| unknown protein ; supported by full-length cDNA: Ceres:36855.                                                                                | 267503_at   | -0.9 |
| putative phosphoribosylaminoimidazolecarboxamide formyltransferase                                                                           | 267421_at   | -0.9 |
| putative uricase subunit similar to nodulin-35; identical to GB:Y11120;supported by full-length cDNA: Ceres:38538.                           | 267374_at   | -0.9 |
| putative thromboxane-A synthase ; supported by cDNA: gi_15810029_gb_AY054283.1_                                                              | 267380_at   | -0.9 |
| unknown protein                                                                                                                              | 267235_at   | -0.9 |
| putative methylenetetrahydrofolate reductase ; supported by cDNA: gi_15215809_gb_AY050434.1_                                                 | 267187_s_at | -0.9 |
| hypothetical protein predicted by genscan                                                                                                    | 267057_at   | -0.9 |
| unknown protein ; supported by cDNA: gi_15292712_gb_AY050790.1_                                                                              | 266898_at   | -0.9 |
| unknown protein ; supported by cDNA: gi_15450758_gb_AY053421.1_                                                                              | 266553_at   | -0.9 |
| putative tropinone reductase ;supported by full-length cDNA: Ceres:2618.                                                                     | 266293_at   | -0.9 |
| putative glutathione S-transferase ;supported by full-length cDNA: Ceres:24361.                                                              | 266296_at   | -0.9 |
| putative dTDP-glucose 4-6-dehydratase ;supported by full-length cDNA: Ceres:28205.                                                           | 266205_s_at | -0.9 |
| putative ribosomal protein L7 ;supported by full-length cDNA: Ceres:13298.                                                                   | 265736_at   | -0.9 |
| putative alanine acetyl transferase                                                                                                          | 265725_at   | -0.9 |
| hypothetical protein predicted by genscan                                                                                                    | 265698_at   | -0.9 |
| 60S ribosomal protein L12 ;supported by full-length cDNA: Ceres:23523.                                                                       | 265445_at   | -0.9 |
| putative riboflavin synthase alpha chain ; supported by full-length cDNA: Ceres: 528.                                                        | 265389_at   | -0.9 |
| hypothetical protein predicted by genscan; supported by cDNA: gi_15724317_gb_AF412099.1_AF412099                                             | 265342_at   | -0.9 |



|                                                                                                                                                   |           |      |
|---------------------------------------------------------------------------------------------------------------------------------------------------|-----------|------|
| unknown protein similar to unknown protein GB:AAD55495                                                                                            | 264893_at | -0.9 |
| zinc finger protein ATZF1, putative identical to GB:BAA25989; supported by cDNA: gi_3123711_dbj_D89051.1_D89051                                   | 264624_at | -0.9 |
| unknown protein similar to ATP-citrate-lyase; Location of EST gb Z34587. Highly similar to F8A5.32, gb 2462746 and similar to ATP-citrate-lyase   | 264504_at | -0.9 |
| unknown protein similar to ESTs gb T20511, gb T45308, gb H36493, and gb AA651176; supported by full-length cDNA: Ceres:2558.                      | 264463_at | -0.9 |
| putative protein phosphatase 2C ;supported by full-length cDNA: Ceres:11428.                                                                      | 264376_at | -0.9 |
| unknown protein predicted by genscan and grail; supported by full-length cDNA: Ceres:14105.                                                       | 264380_at | -0.9 |
| aminomethyltransferase-like precursor protein very strong similarity to aminomethyltransferase precursor gb U9769 from Mesembryanthemum c         | 264394_at | -0.9 |
| putative NPK1-related protein kinase 2 similar to nitrate chlorate transporter GB:Q05085 from (Arabidopsis thaliana); supported by cDNA: gi_166f  | 264348_at | -0.9 |
| hypothetical protein predicted by grail; supported by full-length cDNA: Ceres:2928.                                                               | 263980_at | -0.9 |
| putative MAP kinase ; supported by cDNA: gi_15724283_gb_AF412082.1_AF412082                                                                       | 263989_at | -0.9 |
| putative receptor-like protein kinase                                                                                                             | 263913_at | -0.9 |
| putative indole-3-glycerol phosphate synthase ; supported by full-length cDNA: Ceres:3006.                                                        | 263807_at | -0.9 |
| putative protein phosphatase 2C ; supported by full-length cDNA: Ceres:22316.                                                                     | 263711_at | -0.9 |
| unknown protein ESTs gb T20589, gb T04648, gb AA597906, gb T04111, gb R84180, gb R65428, gb T44439, gb T76570, gb R90004, gb T4502                | 263709_at | -0.9 |
| putative GDP-mannose pyrophosphorylase                                                                                                            | 263619_at | -0.9 |
| Expressed protein ; supported by full-length cDNA: Ceres: 21909.                                                                                  | 263630_at | -0.9 |
| Expressed protein ; supported by cDNA: gi_13926282_gb_AF372895.1_AF372895                                                                         | 263632_at | -0.9 |
| unknown protein ; supported by full-length cDNA: Ceres: 97914.                                                                                    | 263541_at | -0.9 |
| phosphoenolpyruvate carboxylase                                                                                                                   | 263491_at | -0.9 |
| cold-regulated protein cor15a precursor ; supported by cDNA: gi_14532457_gb_AY039853.1_                                                           | 263497_at | -0.9 |
| unknown protein similar to hypothetical protein GB:AAF27090 GI:6730669 from (Arabidopsis thaliana); supported by full-length cDNA: Ceres:1018     | 262986_at | -0.9 |
| hypothetical protein similar to putative transporter GI:6598860 from [Arabidopsis thaliana]                                                       | 262935_at | -0.9 |
| endomembrane protein, putative similar to endomembrane protein emp70 precursor isolog GB:AAF67014 GI:7677068 [Homo sapiens]; supporte             | 262846_at | -0.9 |
| putative DNA binding protein similar to gb U90212 DNA binding protein ACBF from Nicotiana tabacum and contains 3 PF 00076 RNA recognitior         | 262824_at | -0.9 |
| hypothetical protein predicted by genscan+; supported by full-length cDNA: Ceres:109912.                                                          | 262711_at | -0.9 |
| unknown protein EST gb N65467 comes from this gene; supported by full-length cDNA: Ceres:30239.                                                   | 262598_at | -0.9 |
| 20S proteasome subunit PAE1 identical to 20S proteasome subunit PAE1 GI:3421087 from [Arabidopsis thaliana]; supported by full-length cDNA:       | 262258_at | -0.9 |
| unknown protein                                                                                                                                   | 262092_at | -0.9 |
| protein disulfide isomerase, putative similar to GB:AAA85099 GI:687235 from [Onchocerca volvulus]; supported by cDNA: gi_14423497_gb_AF3          | 262024_at | -0.9 |
| unknown protein similar to putative DNA-binding protein GI:6714399 from [Arabidopsis thaliana]; supported by full-length cDNA: Ceres:92341.       | 261942_at | -0.9 |
| sterol delta7 reductase identical to GB:AAF63498 GI:7542561 from [Arabidopsis thaliana]; supported by cDNA: gi_1245181_gb_U49398.1_ATU4           | 261865_at | -0.9 |
| unknown protein ; supported by full-length cDNA: Ceres:122986.                                                                                    | 261788_at | -0.9 |
| ribonucleoprotein, putative similar to 33 KDA RIBONUCLEOPROTEIN GB:P19684 from [Nicotiana glauca]; supported by full-length cDNA: Cer             | 261577_at | -0.9 |
| pyruvate dehydrogenase E1 alpha subunit identical to pyruvate dehydrogenase E1 alpha subunit GB:AAB86803 GI:2454182 from [Arabidopsis th          | 261583_at | -0.9 |
| polyphosphoinositide binding protein, putative similar to polyphosphoinositide binding protein Ssh2p GB:AAB94599 GI:2739046 from [Glycine m       | 261563_at | -0.9 |
| nodulin protein, putative similar to GB:2598575 from [Medicago truncatula]; supported by full-length cDNA: Ceres:149985.                          | 261335_at | -0.9 |
| protein kinase, putative contains similarity to many predicted protein kinases; supported by cDNA: gi_13430527_gb_AF360176.1_AF360176             | 261308_at | -0.9 |
| unknown protein ; supported by cDNA: gi_14334567_gb_AY034957.1_                                                                                   | 261273_at | -0.9 |
| thioredoxin identical to GB:CAA84610 from [Arabidopsis thaliana] (Proc. Natl. Acad. Sci. U.S.A. 92 (12), 5620-5624 (1995)); supported by full-len | 261145_at | -0.9 |
| hypothetical protein predicted by genemark.hmm                                                                                                    | 260919_at | -0.9 |
| hypothetical protein similar to carboxyvinyl-carboxyphosphonate phosphorylmutase GB:O49290 from [Arabidopsis thaliana]                            | 260902_at | -0.9 |
| biotin synthase (Bio B) ; supported by full-length cDNA: Ceres:42038.                                                                             | 260548_at | -0.9 |
| Unknown protein ; supported by cDNA: gi_15028352_gb_AY045979.1_                                                                                   | 260508_at | -0.9 |
| hypothetical protein predicted by genefinder; supported by full-length cDNA: Ceres:99920.                                                         | 260427_at | -0.9 |

|                                                                                                                                                  |             |      |
|--------------------------------------------------------------------------------------------------------------------------------------------------|-------------|------|
| acid phosphatase, putative similar to GI:5360721 from (Lupinus albus)                                                                            | 260421_at   | -0.9 |
| putative 3-isopropylmalate dehydrogenase similar to 3-ISOPROPYLMALATE DEHYDROGENASE PRECURSOR GB:P29102 from (Brassica nap                       | 260285_at   | -0.9 |
| unknown protein contains Pfam profile: PF00561 alpha/beta hydrolase fold;supported by full-length cDNA: Ceres:36063.                             | 260232_at   | -0.9 |
| putative histidinol-phosphate aminotransferase similar to histidinol-phosphate aminotransferase GB:CAA70403 from [Nicotiana tabacum]             | 260172_s_at | -0.9 |
| fructokinase, putative similar to fructokinase (Lycopersicon esculentum) GI:2102691; supported by cDNA: gi_13878132_gb_AF370329.1_AF370          | 260107_at   | -0.9 |
| Expressed protein ; supported by full-length cDNA: Ceres: 42300.                                                                                 | 259603_at   | -0.9 |
| unknown protein ; supported by cDNA: gi_15028026_gb_AY045870.1_                                                                                  | 259460_at   | -0.9 |
| putative mitochondrial processing peptidase alpha subunit similar to mitochondrial processing peptidase GB:X66284 (Solanum tuberosum); sup       | 259326_at   | -0.9 |
| putative cytoskeleton-associated protein similar to cytoskeleton-associated protein 1 GB:4502849 [Homo sapiens]                                  | 259141_at   | -0.9 |
| unknown protein similar to unknown protein GB:AAC62889 [Arabidopsis thaliana];supported by full-length cDNA: Ceres:15153.                        | 259154_at   | -0.9 |
| putative coatomer zeta subunit (zeta-coat protein) similar to coatomer zeta subunit (zeta-coat protein) GB:P35604 (Bos taurus)                   | 258710_s_at | -0.9 |
| putative GDSL-motif lipase/acylhydrolase contains Pfam profile: lipase/acylhydrolase with GDSL-like motif;supported by full-length cDNA: Ceres:1 | 258589_at   | -0.9 |
| putative mannose-6-phosphate isomerase similar to mannose-6-phosphate isomerase GB:NP_002426 from [Homo sapiens];supported by full-len           | 258483_at   | -0.9 |
| hypothetical protein contains similarity to putative phosphate/phosphoenolpyruvate translocator protein GB:AAD20711 from [Arabidopsis thaliana]  | 258371_at   | -0.9 |
| putative coatomer complex subunit similar to subunit of coatomer complex GB:X70476 from [Homo sapiens]                                           | 258331_at   | -0.9 |
| dihydroliipoamide S-acetyltransferase identical to GB:AAD55139 from [Arabidopsis thaliana]; supported by cDNA: gi_14335165_gb_AY037262.1_        | 258086_at   | -0.9 |
| hypothetical protein similar to hypothetical protein GB:AAF01546 from [Arabidopsis thaliana]                                                     | 257999_at   | -0.9 |
| actin 2 identical to GB:AAB37098 from [Arabidopsis thaliana], Plant J. 10 (1), 107-121 (1996);supported by full-length cDNA: Ceres:3819.         | 257749_at   | -0.9 |
| succinate dehydrogenase iron-protein subunit, putative similar to succinate dehydrogenase iron-protein subunit (SDHB) GB:BAA82749 [Oryza sa      | 257713_at   | -0.9 |
| integral membrane protein, putative contains Pfam profile: PF01554 uncharacterized membrane protein family; supported by cDNA: gi_1632312(       | 257314_at   | -0.9 |
| non-phototropic hypocotyl protein, putative similar to GB:AAF05914 from [Arabidopsis thaliana];supported by full-length cDNA: Ceres:118259.      | 257294_at   | -0.9 |
| Expressed protein ; supported by full-length cDNA: Ceres: 12588.                                                                                 | 257152_at   | -0.9 |
| putative protein phosphatase type 2C similar to protein phosphatase type 2C GB:AAD17805 from [Lotus japonicus]                                   | 257050_at   | -0.9 |
| unknown protein                                                                                                                                  | 257074_at   | -0.9 |
| longevity factor-like protein similar to LAG1Ce-1 GB:AAD16893 from [Caenorhabditis elegans] (Genome Res.(1998) 8 (12), 1259-1272);supporte       | 257038_at   | -0.9 |
| expressed protein supported by cDNA: gi:14334707                                                                                                 | 256956_at   | -0.9 |
| hypothetical protein                                                                                                                             | 256914_at   | -0.9 |
| hypothetical protein predicted by genefinder;supported by full-length cDNA: Ceres:23892.                                                         | 256722_at   | -0.9 |
| unknown protein ;supported by full-length cDNA: Ceres:31357.                                                                                     | 256674_at   | -0.9 |
| unknown protein ; supported by full-length cDNA: Ceres: 368.                                                                                     | 256617_at   | -0.9 |
| hypothetical protein predicted by genscan                                                                                                        | 256427_at   | -0.9 |
| phosphoinositide specific phospholipase (AtPLC2) identical to phosphoinositide specific phospholipase (AtPLC2) GI:857374 [Arabidopsis thaliana   | 256156_at   | -0.9 |
| mitogen-activated protein kinase, putative similar to mitogen-activated protein kinase GI:5815410 from [Oryza sativa]; supported by cDNA: gi_15  | 256075_at   | -0.9 |
| hypothetical protein predicted by genemark.hmm                                                                                                   | 256086_at   | -0.9 |
| hypothetical protein                                                                                                                             | 255978_at   | -0.9 |
| glycine-rich RNA-binding protein, putative similar to glycine-rich RNA-binding protein GI:17818 from [Brassica napus]                            | 255962_at   | -0.9 |
| 14-3-3 protein GF14epsilon (grf10) identical to 14-3-3 protein GF14 epsilon GI:5802798, SP:P48347 from [Arabidopsis thaliana];supported by ful   | 255966_at   | -0.9 |
| ABC transporter, putative similar to ABC transporter GI:10280532 from [Homo sapiens]                                                             | 255889_at   | -0.9 |
| 12-oxophytodienoate reductase, putative similar to 12-oxophytodienoate reductase OPR1 GI:3882355 from [Arabidopsis thaliana]                     | 255895_at   | -0.9 |
| coded for by A. thaliana cDNA T20615 ;supported by full-length cDNA: Ceres:37305.                                                                | 255626_at   | -0.9 |
| hypothetical protein ; supported by cDNA: gi_15982914_gb_AY057565.1_                                                                             | 255572_at   | -0.9 |
| receptor protein kinase-like protein receptor protein kinase-like protein - Arabidopsis thaliana, PIR2:T05898                                    | 255116_at   | -0.9 |
| putative protein hypothetical protein F6E13.15 - Arabidopsis thaliana,PIR2:T00682                                                                | 255041_at   | -0.9 |
| hydroxymethylglutaryl-CoA synthase ;supported by full-length cDNA: Ceres:22413.                                                                  | 254845_at   | -0.9 |

|                                                                                                                                          |             |      |
|------------------------------------------------------------------------------------------------------------------------------------------|-------------|------|
| putative protein KIAA0255 gene, Homo sapiens, gb:D87444                                                                                  | 254827_at   | -0.9 |
| translation initiation factor eIF3 - like protein translation initiation factor eIF3 p66 subunit, Homo sapiens, PID:g2351378             | 254438_at   | -0.9 |
| putative protein riboflavin biosynthesis protein ribG, Synechocystis sp., PIR2:S74377;supported by full-length cDNA: Ceres:99319.        | 254444_at   | -0.9 |
| tubulin beta-9 chain ;supported by full-length cDNA: Ceres:36891.                                                                        | 254446_at   | -0.9 |
| putative protein ribophorin II precursor, Homo sapiens, PIR2:B26168                                                                      | 254456_at   | -0.9 |
| putative protein alternative oxidase, Mangifera indica, PIR2:S45035; supported by cDNA: gi_15010795_gb_AY045699.1_                       | 254335_at   | -0.9 |
| predicted protein predicted protein ERG25, Saccharomyces cerevisiae, PIR2:S64354                                                         | 254333_at   | -0.9 |
| gamma-glutamylcysteine synthetase ; supported by cDNA: gi_15912188_gb_AY056372.1_                                                        | 254270_at   | -0.9 |
| putative protein storage protein - Populus deltoides, PIR2:S31580;supported by full-length cDNA: Ceres:8772.                             | 254163_s_at | -0.9 |
| putative pectate lyase pectate lyase, Musa acuminata, PATX:E209876;supported by full-length cDNA: Ceres:36681.                           | 254119_at   | -0.9 |
| mitogen activated protein kinase kinase (nMAPKK) ;supported by full-length cDNA: Ceres:31259.                                            | 253993_at   | -0.9 |
| photosystem II protein W - like photosystem II protein W, Porphyra purpurea, PIR2:S73268; supported by full-length cDNA: Ceres: 2419.    | 253790_at   | -0.9 |
| aspartate aminotransferase ;supported by full-length cDNA: Ceres:33414., Ceres:103854.                                                   | 253481_at   | -0.9 |
| putative protein acetylpolyamine aminohydrolase (aphA) homolog -Archaeoglobus fulgidus,PIR2:B69266; supported by cDNA: gi_15529219_gb_   | 253337_at   | -0.9 |
| Nonclathrin coat protein gamma - like protein coat protein gamma-cop, Bos primigenius                                                    | 253231_at   | -0.9 |
| amidophosphoribosyltransferase 2 precursor                                                                                               | 253252_at   | -0.9 |
| putative protein Cyanophora paradoxa cyanelle, predicted protein;supported by full-length cDNA: Ceres:2912.                              | 253197_at   | -0.9 |
| putative protein cylicin II - bovine, PIR2:I46014                                                                                        | 252952_at   | -0.9 |
| Inositol monophosphatase - like protein Mono-phosphatase, Streptomyces anulatus, X92429                                                  | 252934_at   | -0.9 |
| shikimate kinase - like protein shikimate kinase precursor, Lycopersicon esculentum, gb:S21584                                           | 252900_at   | -0.9 |
| cytochrome P450 -like protein cytochrome P450 CYP86A1, Arabidopsis thaliana, EMBL:X90458;supported by full-length cDNA: Ceres:120342.    | 252911_at   | -0.9 |
| histone H3.3 ; supported by cDNA: gi_14326561_gb_AF385735.1_AF385735                                                                     | 252824_at   | -0.9 |
| Expressed protein ; supported by full-length cDNA: Ceres: 157151.                                                                        | 252412_at   | -0.9 |
| H-protein promoter binding factor-2a ;supported by full-length cDNA: Ceres:113639.                                                       | 252429_at   | -0.9 |
| putative protein saposin precursor - Homo sapiens, PIR:SAHUP;supported by full-length cDNA: Ceres:93651.                                 | 252075_at   | -0.9 |
| nodulin / glutamate-ammonia ligase - like protein Mtn6 - nodulin 6, Medicago truncatula, EMBL:MET133118                                  | 251973_at   | -0.9 |
| dTDP-glucose 4-6-dehydratase -like protein dTDP-glucose 4-6-dehydratase, Cicer arietinum, EMBL:AJ275318 contains non-consensus AT dono   | 251945_at   | -0.9 |
| GTPase AtRAB8 ;supported by full-length cDNA: Ceres:27384.                                                                               | 251960_at   | -0.9 |
| putative protein GATA transcription factor 3, Arabidopsis thaliana, Y13650; supported by cDNA: gi_15724333_gb_AF412107.1_AF412107        | 251861_at   | -0.9 |
| ribosomal L23a - like protein various ribosomal L23a proteins;supported by full-length cDNA: Ceres:17531.                                | 251783_at   | -0.9 |
| ABC transporter - like protein breast cancer resistance protein 1 BCRP1, Mus musculus, EMBL:NP_036050; supported by cDNA: gi_15028218_   | 251785_at   | -0.9 |
| putative protein hypothetical protein SPCC320.08 - Schizosaccharomyces pombe, PIR:T41303                                                 | 251516_s_at | -0.9 |
| ribosomal protein S13 -like AtRPS13A mRNA for cytoplasmic ribosomal protein S13, Arabidopsis thaliana,AB031739; supported by cDNA: gi_14 | 251341_at   | -0.9 |
| RING finger protein ;supported by full-length cDNA: Ceres:25801.                                                                         | 251321_at   | -0.9 |
| homeobox-leucine zipper protein ATHB-12 ;supported by full-length cDNA: Ceres:32615.                                                     | 251272_at   | -0.9 |
| ABC transporter -like protein NBD-like protein POP, Arabidopsis thaliana, EMBL:AF127664;supported by full-length cDNA: Ceres:21701.      | 251020_at   | -0.9 |
| putative protein ; supported by cDNA: gi_15724319_gb_AF412100.1_AF412100                                                                 | 250929_at   | -0.9 |
| putative protein ;supported by full-length cDNA: Ceres:3115.                                                                             | 250954_at   | -0.9 |
| ABC transporter-like protein ; supported by cDNA: gi_14488081_gb_AF389289.1_AF389289                                                     | 250690_at   | -0.9 |
| peptide methionine sulfoxide reductase-like protein peptide methionine sulfoxide reductase (msr) - Arabidopsis thaliana, EMBL:AJ133753   | 250633_at   | -0.9 |
| putative protein densin-180, Rattus norvegicus, PIR:T31434                                                                               | 250577_at   | -0.9 |
| serine/threonine protein kinase ;supported by full-length cDNA: Ceres:5323.                                                              | 250545_at   | -0.9 |
| putative protein phosphatase protein tyrosine phosphatase-like protein PTPLB, Mus musculus, EMBL:AF169286                                | 250428_at   | -0.9 |
| clathrin binding protein - like Af10-protein, Avena fatua, EMBL:U80041                                                                   | 250356_at   | -0.9 |

|                                                                                                                                                              |           |      |
|--------------------------------------------------------------------------------------------------------------------------------------------------------------|-----------|------|
| NADP dependent malic enzyme - like protein NADP dependent malic enzyme, <i>P. vulgaris</i> , EMBL:PVME1G; supported by cDNA: gi_16226465_gb                  | 250339_at | -0.9 |
| putative protein similar to unknown protein (pir T09909)                                                                                                     | 250307_at | -0.9 |
| putative protein predicted protein, <i>Arabidopsis thaliana</i>                                                                                              | 250282_at | -0.9 |
| phytoene synthase (gb AAB65697.1) ;supported by full-length cDNA: Ceres:15761.                                                                               | 250095_at | -0.9 |
| anthranilate phosphoribosyltransferase, chloroplast precursor (sp Q02166) ; supported by cDNA: gi_15450851_gb_AY054506.1_                                    | 250014_at | -0.9 |
| apyrase (gb AAF00612.1) ; supported by cDNA: gi_6006800_gb_AF156783.1_AF156783                                                                               | 250034_at | -0.9 |
| glutaredoxin -like protein glutaredoxin, castor bean, PIR:S54825;supported by full-length cDNA: Ceres:92720.                                                 | 249996_at | -0.9 |
| putative protein 2 -hydroxyisoflavone reductase (EC 1.3.1.45) - <i>Nicotiana tabacum</i> , PIR:T02202;supported by full-length cDNA: Ceres:17121.            | 250006_at | -0.9 |
| beta-amylase-like proten beta-amylase - <i>Prunus armeniaca</i> , EMBL:AF139501;supported by full-length cDNA: Ceres:30798.                                  | 250007_at | -0.9 |
| NAC-domain protein-like ;supported by full-length cDNA: Ceres:29829.                                                                                         | 249940_at | -0.9 |
| soluble starch synthase                                                                                                                                      | 249785_at | -0.9 |
| putative protein tyrosine aminotransferase-like; also similar to nicotianamine aminotransferase                                                              | 249688_at | -0.9 |
| glutamate--ammonia ligase ; supported by cDNA: gi_16226386_gb_AF428386.1_AF428386                                                                            | 249581_at | -0.9 |
| putative protein similar to unknown protein (pir T04523)                                                                                                     | 249093_at | -0.9 |
| zinc finger protein Glo3-like                                                                                                                                | 248863_at | -0.9 |
| putative protein similar to unknown protein (gb AAB97010.1)                                                                                                  | 248705_at | -0.9 |
| unknown protein                                                                                                                                              | 248312_at | -0.9 |
| putative protein similar to unknown protein (emb CAA71173.1);supported by full-length cDNA: Ceres:19542.                                                     | 248327_at | -0.9 |
| unknown protein ;supported by full-length cDNA: Ceres:148254.                                                                                                | 248282_at | -0.9 |
| putative protein contains similarity to MYB family transcription factor                                                                                      | 248246_at | -0.9 |
| NADH-dependent glutamate synthase                                                                                                                            | 248267_at | -0.9 |
| putative protein strong similarity to unknown protein (pir T05748); supported by cDNA: gi_15010657_gb_AY045630.1_                                            | 248177_at | -0.9 |
| transport protein particle component Bet3p-like protein ;supported by full-length cDNA: Ceres:122866.                                                        | 248127_at | -0.9 |
| TCH4 protein (gb AAA92363.1) ; supported by cDNA: gi_14194112_gb_AF367262.1_AF367262                                                                         | 247925_at | -0.9 |
| Cf-5 disease resistance protein - like Hcr2-0B, <i>Lycopersicon esculentum</i> , EMBL:AF053995                                                               | 247569_at | -0.9 |
| putative protein various predicted proteins, <i>Arabidopsis thaliana</i> ; supported by full-length cDNA: Ceres: 6441.                                       | 247464_at | -0.9 |
| putative protein hypersensitive-induced response protein HIR3, <i>Zea mays</i> , EMBL:AF236375;supported by full-length cDNA: Ceres:2641.                    | 247403_at | -0.9 |
| beta-galactosidase (emb CAB64742.1) ; supported by cDNA: gi_16649044_gb_AY059892.1_                                                                          | 247356_at | -0.9 |
| GTP-binding protein ; supported by full-length cDNA: Ceres: 30437.                                                                                           | 247202_at | -0.9 |
| ADP-ribosylation factor-like protein ;supported by full-length cDNA: Ceres:35979.                                                                            | 247008_at | -0.9 |
| AtBgamma - like protein B regulatory subunit of PP2A, <i>Arabidopsis thaliana</i> , EMBL:ATU73528; supported by cDNA: gi_16604606_gb_AY05974                 | 246907_at | -0.9 |
| TCP-1 chaperonin-like protein t-complex-type molecular chaperone Cctz - <i>Mus musculus</i> , EMBL:Z31557                                                    | 246480_at | -0.9 |
| putative protein ;supported by full-length cDNA: Ceres:22994.                                                                                                | 246486_at | -0.9 |
| putative protein hypothetical protein F16B3.27 - <i>Arabidopsis thaliana</i> , EMBL:AC021640;supported by full-length cDNA: Ceres:18222.                     | 246505_at | -0.9 |
| SigA binding protein ; supported by cDNA: gi_14596086_gb_AY042831.1_                                                                                         | 246293_at | -0.9 |
| sulfate transporter ATST1 ; supported by cDNA: gi_2285884_dbj_D89631.1_D89631                                                                                | 246310_at | -0.9 |
| putative protein ;supported by full-length cDNA: Ceres:36845.                                                                                                | 246199_at | -0.9 |
| hydroxymethylbilane synthase ;supported by full-length cDNA: Ceres:3051.                                                                                     | 246033_at | -0.9 |
| protein kinase, putative similar to protein kinase Gi:717180 from ( <i>Arabidopsis thaliana</i> )                                                            | 245825_at | -0.9 |
| chorismate synthase, putative similar to chorismate synthase Gi:452796 from [ <i>Synechocystis</i> sp.]; supported by cDNA: gi_15982823_gb_AY057:            | 245832_at | -0.9 |
| light-harvesting complex protein similar to light-harvesting complex protein Gi:22752 from [ <i>Pinus sylvestris</i> ];supported by full-length cDNA: Ceres: | 245806_at | -0.9 |
| unknown protein ;supported by full-length cDNA: Ceres:39155.                                                                                                 | 245730_at | -0.9 |
| salt-inducible protein homolog                                                                                                                               | 245494_at | -0.9 |
| similar to latex allergen from <i>Hevea brasiliensis</i> ;supported by full-length cDNA: Ceres:1999.                                                         | 245038_at | -0.9 |

|                                                                                                                                                      |             |      |
|------------------------------------------------------------------------------------------------------------------------------------------------------|-------------|------|
| photosystem II G protein                                                                                                                             | 245011_at   | -0.9 |
| ribosomal protein S19                                                                                                                                | 244986_at   | -0.9 |
| NADH dehydrogenase ND6                                                                                                                               | 244934_at   | -0.9 |
| putative protein similar to unknown protein (emb CAB67623.1)                                                                                         | 250696_at   | -0.9 |
| origin recognition complex protein identical to GB:U40269;supported by full-length cDNA: Ceres:42701.                                                | 267173_at   | -0.9 |
| hypothetical protein predicted by genscan+                                                                                                           | 264864_at   | -0.9 |
| hypothetical protein predicted by genscan                                                                                                            | 259642_at   | -0.9 |
| unknown protein similar to leucine-rich repeat protein GB:CAA76000 and GB:CAA76001 from [Arabidopsis thaliana]                                       | 258390_at   | -0.9 |
| putative protein                                                                                                                                     | 255527_at   | -0.9 |
| putative protein p47 - Homo sapiens,PID:g5531827                                                                                                     | 254348_at   | -0.9 |
| cyclophilin - like protein cyclophilin, Arabidopsis thaliana, PID:g2443755                                                                           | 253216_at   | -0.9 |
| putative pectinesterase pectinesterase - Lycopersicon esculentum, PID:e312172                                                                        | 252989_at   | -0.9 |
| CONSTANS-like 1                                                                                                                                      | 246523_at   | -0.9 |
| unknown protein predicted by genscan; similar to GP 9826 X07453; supported by full-length cDNA: Ceres: 12267.                                        | 267637_at   | -0.8 |
| unknown protein                                                                                                                                      | 267511_at   | -0.8 |
| unknown protein                                                                                                                                      | 267310_at   | -0.8 |
| putative CCAAT-binding transcription factor subunit                                                                                                  | 267315_at   | -0.8 |
| similar to late embryogenesis abundant proteins ; supported by full-length cDNA: Ceres: 2450.                                                        | 267212_at   | -0.8 |
| aspartate aminotransferase (AAT1) identical to GB:U15026;supported by full-length cDNA: Ceres:34360.                                                 | 267151_at   | -0.8 |
| actin 3 identical to GB:U29480;supported by full-length cDNA: Ceres:19581.                                                                           | 267175_s_at | -0.8 |
| putative choline kinase ;supported by full-length cDNA: Ceres:37620.                                                                                 | 266861_at   | -0.8 |
| 1-aminocyclopropane-1-carboxylate synthase (ACS4) identical to GB:U23481; supported by cDNA: gi_12083215_gb_AF332404.1_AF332404                      | 266830_at   | -0.8 |
| Expressed protein ; supported by cDNA: gi_14334701_gb_AY035024.1_                                                                                    | 266802_at   | -0.8 |
| hypothetical protein predicted by graill                                                                                                             | 266668_at   | -0.8 |
| Expressed protein ; supported by full-length cDNA: Ceres: 7600.                                                                                      | 266500_at   | -0.8 |
| mevalonate diphosphate decarboxylase identical to GB:Y14325;supported by full-length cDNA: Ceres:35493.                                              | 266414_at   | -0.8 |
| calmodulin-like protein identical to GB:X68054;supported by full-length cDNA: Ceres:11537.                                                           | 266371_at   | -0.8 |
| putative tropinone reductase                                                                                                                         | 266279_at   | -0.8 |
| unknown protein ; supported by cDNA: gi_16604321_gb_AY058059.1_                                                                                      | 266101_at   | -0.8 |
| unknown protein                                                                                                                                      | 266075_s_at | -0.8 |
| hypothetical protein predicted by genscan                                                                                                            | 265704_at   | -0.8 |
| unknown protein                                                                                                                                      | 265539_at   | -0.8 |
| similar to cold acclimation protein WCOR413 [Triticum aestivum] ;supported by full-length cDNA: Ceres:7835.                                          | 265480_at   | -0.8 |
| succinyl-CoA ligase beta subunit ;supported by full-length cDNA: Ceres:36904.                                                                        | 265257_at   | -0.8 |
| histidine transport protein (PTR2-B) ; supported by cDNA: gi_13937184_gb_AF372946.1_AF372946                                                         | 265220_at   | -0.8 |
| 3-ketoacyl-acyl carrier protein synthase III (KAS III) identical to 3-ketoacyl-acyl carrier protein synthase III (KAS III) GB:CAA72385 GI:1888359 (A | 265120_at   | -0.8 |
| T-complex chaperonin protein , epsilon subunit identical to GB:O04450, similar to ESTs gb R29812, emb Z38124, gb AA297087, gb R29812, gb             | 265010_at   | -0.8 |
| DNAJ-like heatshock protein similar to GB:AAD39493                                                                                                   | 264865_at   | -0.8 |
| unknown protein similar to C-1 (Homo sapiens) (U41816); supported by full-length cDNA: Ceres: 20276.                                                 | 264778_at   | -0.8 |
| hypothetical protein predicted by genscan;supported by full-length cDNA: Ceres:6295.                                                                 | 264672_at   | -0.8 |
| unknown protein ;supported by full-length cDNA: Ceres:25136.                                                                                         | 264635_at   | -0.8 |
| putative vesicle transport protein Contains similarity to vesicle trafficking protein gb U91538 from Mus musculus. ESTs gb F15494 and gb F14097      | 264373_at   | -0.8 |
| putative seryl-tRNA synthetase similar to GB:CAA73496; supported by cDNA: gi_16226852_gb_AF428351.1_AF428351                                         | 264350_at   | -0.8 |
| unknown protein ;supported by full-length cDNA: Ceres:16387.                                                                                         | 264286_at   | -0.8 |

|                                                                                                                                                    |             |      |
|----------------------------------------------------------------------------------------------------------------------------------------------------|-------------|------|
| putative gibberellin-regulated protein contains similarity to gibberellin-regulated protein 2 precursor (GAST1) homolog gb U11765 from A. thaliana | 264195_at   | -0.8 |
| putative sucrose transport protein, SUC2 strong similarity to GB:S38196 sucrose transport protein SUC2 from [Arabidopsis thaliana];supported by    | 264204_at   | -0.8 |
| RAS-related protein, RAB7 identical GB:O04157 RAS-RELATED PROTEIN RAB7 from [Arabidopsis thaliana]; supported by cDNA: gi_15718415                 | 264209_at   | -0.8 |
| Expressed protein ; supported by full-length cDNA: Ceres: 2681.                                                                                    | 264096_at   | -0.8 |
| NADH dehydrogenase, putative similar to NADH dehydrogenase GI:668984 from [Solanum tuberosum];supported by full-length cDNA: Ceres:54              | 264097_s_at | -0.8 |
| putative signal sequence receptor, alpha subunit (SSR-alpha) Same as GP: 1174448;supported by full-length cDNA: Ceres:27787.                       | 264020_at   | -0.8 |
| putative lipase ; supported by cDNA: gi_15293128_gb_AY050998.1_                                                                                    | 263987_at   | -0.8 |
| putative mitochondrial carrier protein                                                                                                             | 263943_at   | -0.8 |
| putative pyruvate kinase ;supported by full-length cDNA: Ceres:120685.                                                                             | 263922_s_at | -0.8 |
| unknown protein ; supported by cDNA: gi_15294187_gb_AF410285.1_AF410285                                                                            | 263805_at   | -0.8 |
| coatomer alpha subunit                                                                                                                             | 263743_at   | -0.8 |
| putative ferredoxin-thioredoxin reductase ;supported by full-length cDNA: Ceres:40781.                                                             | 263624_at   | -0.8 |
| unknown protein                                                                                                                                    | 263513_at   | -0.8 |
| unknown protein                                                                                                                                    | 263456_at   | -0.8 |
| predicted protein ;supported by full-length cDNA: Ceres:28779.                                                                                     | 263410_at   | -0.8 |
| unknown protein ;supported by full-length cDNA: Ceres:641.                                                                                         | 263421_at   | -0.8 |
| ADP-ribosylation factor 1 ;supported by full-length cDNA: Ceres:34414.                                                                             | 263321_at   | -0.8 |
| histone H2A ; supported by full-length cDNA: Ceres: 8.                                                                                             | 263264_at   | -0.8 |
| putative GTP-binding protein Similar to WO8E3.3 gi 3880615 putative GTP-binding protein from C. elegans cosmid gb Z92773. EST gb AA59733           | 263224_at   | -0.8 |
| unknown protein ;supported by full-length cDNA: Ceres:3173.                                                                                        | 263129_at   | -0.8 |
| class 1 non-symbiotic hemoglobin (AHB1) identical to GP:2581783:U94998;supported by full-length cDNA: Ceres:18195.                                 | 263096_at   | -0.8 |
| hypothetical protein similar to hypothetical protein GB:AAF27077 GI:6730656 from (Arabidopsis thaliana)                                            | 263015_at   | -0.8 |
| hypothetical protein contains similarity to Na+/H+ antiporter GI:1655701 from [Xenopus laevis]                                                     | 263009_at   | -0.8 |
| hypothetical protein predicted by genemark.hmm; supported by full-length cDNA: Ceres: 19759.                                                       | 262878_at   | -0.8 |
| cytochrome B561, putative similar to cytochrome GB:AAD11424 GI:4206110 [Mesembryanthemum crystallinum]                                             | 262831_at   | -0.8 |
| dynamain, putative similar to dynamain-1 SP:P21575 [Rattus norvegicus (Rat)];supported by full-length cDNA: Ceres:12880.                           | 262837_at   | -0.8 |
| putative sugar transporter protein nearly identical to Arabidopsis sugar transporter, gi 1495273                                                   | 262797_at   | -0.8 |
| putative cytochrome P450 monooxygenase identical to gb X97864 cytochrome P450 from Arabidopsis thaliana and is a member of the PF 00067            | 262793_at   | -0.8 |
| unknown protein EST gb T22808 comes from this gene                                                                                                 | 262776_at   | -0.8 |
| unknown protein                                                                                                                                    | 262700_at   | -0.8 |
| ribonuclease contains similarity to RNase GI:7768564 from [Nicotiana tabacum]                                                                      | 262657_at   | -0.8 |
| peptide transporter, putative similar to PEPTIDE TRANSPORTER PTR2-B GB:P46032 GI:1172704 from [Arabidopsis thaliana]                               | 262281_at   | -0.8 |
| unknown protein ;supported by full-length cDNA: Ceres:12408.                                                                                       | 262168_at   | -0.8 |
| cinnamoyl CoA reductase, putative similar to cinnamoyl CoA reductase GI:2058310 from [Eucalyptus gunnii]; supported by full-length cDNA: Cel       | 261792_at   | -0.8 |
| tubulin alpha-6 chain, putative identical to tubulin alpha-6 chain GB:P29511 from [Arabidopsis thaliana];supported by full-length cDNA: Ceres:15   | 261635_at   | -0.8 |
| unknown protein contains Pfam profile:PF00560 Leucine Rich Repeat (4 copies); Pfam profile:PF00069 Eukaryotic protein kinase domain; Pfam          | 261513_at   | -0.8 |
| Expressed protein ; supported by cDNA: gi_15293296_gb_AY051082.1_                                                                                  | 261417_at   | -0.8 |
| protein kinase, putative similar to many predicted protein kinases                                                                                 | 261339_at   | -0.8 |
| unknown protein ;supported by full-length cDNA: Ceres:207684.                                                                                      | 261201_at   | -0.8 |
| transcription factor TINY, putative similar to transcription factor TINY GB:CAA64359 GI:1246403 from [Arabidopsis thaliana];supported by full-len  | 261059_at   | -0.8 |
| hypothetical protein predicted by genemark.hmm;supported by full-length cDNA: Ceres:19718.                                                         | 260871_at   | -0.8 |
| endochitinase isolog                                                                                                                               | 260568_at   | -0.8 |
| unknown protein similar to hypothetical protein GB:CAA10289 [Cicer arietinum]                                                                      | 260401_at   | -0.8 |
| homeobox gene 13 protein identical to homeobox gene 13 protein gb AAF20996.1 AF208044_1 [Arabidopsis thaliana];supported by full-length cD         | 260395_at   | -0.8 |

|                                                                                                                                                      |             |      |
|------------------------------------------------------------------------------------------------------------------------------------------------------|-------------|------|
| unknown protein                                                                                                                                      | 260281_at   | -0.8 |
| putative glycerophosphodiester phosphodiesterase similar to glycerophosphoryl diester phosphodiesterase GB:AAF12f49 from [Deinococcus radi           | 260254_at   | -0.8 |
| hypothetical protein predicted by genscan+                                                                                                           | 260167_at   | -0.8 |
| putative cinnamyl-alcohol dehydrogenase similar to cinnamyl-alcohol dehydrogenase GB:AAC35846 [Medicago sativa]                                      | 259911_at   | -0.8 |
| unknown protein similar to hypothetical protein GB:CAB39648 [Arabidopsis thaliana]; supported by cDNA: gi_14532697_gb_AY039973.1_                    | 259882_at   | -0.8 |
| putative ribophorin I (dolichyl-diphosphooligosaccharide-protein glycosyltransferase) similar to ribophorin I (dolichyl-diphosphooligosaccharide-prc | 259883_at   | -0.8 |
| putative transcription factor similar to myb-related transcription factor 24 GB:S71287;supported by full-length cDNA: Ceres:31592.                   | 259751_at   | -0.8 |
| putative 30S ribosomal protein S13 similar to putative 30S ribosomal protein S13, chloroplast precursor GB:P42732 [Arabidopsis thaliana]             | 259678_at   | -0.8 |
| protein kinase, putative similar to GI:7573596 from [Populus nigra]                                                                                  | 259671_at   | -0.8 |
| hypothetical protein                                                                                                                                 | 259560_at   | -0.8 |
| putative serine/threonine kinase ; supported by cDNA: gi_15010571_gb_AY045587.1_                                                                     | 259538_at   | -0.8 |
| developmental protein, putative similar to developmental protein DG1118 GI:3789911 from [Dictyostelium discoideum];supported by full-length cl       | 259402_at   | -0.8 |
| putative ribulose-1,5-bisphosphate carboxylase/oxygenase small subunit N-methyltransferase I similar to ribulose-1,5-bisphosphate carboxylase/       | 259258_at   | -0.8 |
| putative thymidine kinase similar to thymidine kinase GB:AAC31168 [Oryza sativa]; supported by full-length cDNA: Ceres: 19188.                       | 259224_at   | -0.8 |
| putative ribosomal protein S2 similar to putative ribosomal protein S2 GB:CAA74226 [Mitochondrion Triticum aestivum];supported by full-length cl     | 259196_at   | -0.8 |
| putative thylakoid lumen rotamase similar to thylakoid lumen rotamase GB:CAA72792 [Spinacia oleracea];supported by full-length cDNA: Ceres:3         | 259193_at   | -0.8 |
| stress related protein, putative similar to stress related protein GB:AAD51854 from [Vitis riparia];supported by full-length cDNA: Ceres:13300.      | 259105_at   | -0.8 |
| unknown protein                                                                                                                                      | 259123_at   | -0.8 |
| putative ubiquitin carboxyl-terminal hydrolase similar to ubiquitin carboxyl-terminal hydrolase GB:AAF01440 [Schizosaccharomyces pombe]              | 258780_at   | -0.8 |
| unknown protein ; supported by cDNA: gi_13811647_gb_AF355757.1_AF355757                                                                              | 258717_at   | -0.8 |
| hypothetical protein predicted by genscan;supported by full-length cDNA: Ceres:19531.                                                                | 258657_at   | -0.8 |
| unknown protein ; supported by cDNA: gi_14334929_gb_AY035138.1_                                                                                      | 258298_at   | -0.8 |
| putative signal peptidase 21kDa subunit similar to signal peptidase 21kDa subunit GB:BAA76439 [Rattus norvegicus]; contains Pfam profile: PF01       | 258276_at   | -0.8 |
| putative acetyltransferase similar to dihydrolipoamide S-acetyltransferase GB:AAD46491 from [Zea mays]; supported by cDNA: gi_13605806_gb_           | 258208_at   | -0.8 |
| nitrate transporter identical to nitrate transporter GB:CAB38706 [Arabidopsis thaliana];supported by full-length cDNA: Ceres:111089.                 | 258181_at   | -0.8 |
| AIG2-like protein similar to AIG2 protein GB:P54121 from [Arabidopsis thaliana];supported by full-length cDNA: Ceres:32718.                          | 258001_at   | -0.8 |
| monosaccharide transport protein, STP4 identical to GB:S25009 from [Arabidopsis thaliana]; supported by cDNA: gi_13605905_gb_AF367352.1.             | 257939_at   | -0.8 |
| prolyl 4-hydroxylase, putative similar to PROLYL 4-HYDROXYLASE ALPHA SUBUNIT PRECURSOR GB:Q10576 from [Caenorhabditis elegans                        | 257844_at   | -0.8 |
| unknown protein                                                                                                                                      | 257867_at   | -0.8 |
| DnaJ protein, putative contains Pfam profile: PF00226 DnaJ domain;supported by full-length cDNA: Ceres:31309.                                        | 257654_at   | -0.8 |
| hypothetical protein                                                                                                                                 | 257641_s_at | -0.8 |
| Expressed protein ; supported by full-length cDNA: Ceres: 22745.                                                                                     | 257271_at   | -0.8 |
| myrosinase-associated protein, putative similar to myrosinase-associated protein GB:CAA71238 from [Brassica napus]                                   | 257072_at   | -0.8 |
| hypothetical protein predicted by genemark.hmm;supported by full-length cDNA: Ceres:34377.                                                           | 256920_at   | -0.8 |
| hypothetical protein contains similarity to flavonol synthase (FLS) GB:Q41452 from [Solanum tuberosum], contains Pfam profile: PF00671 Iron/A:       | 256922_at   | -0.8 |
| cytochrome P450, putative contains Pfam profile: PF00067 cytochrome P450                                                                             | 256870_at   | -0.8 |
| hypothetical protein predicted by genemark.hmm, contains Pfam profile:PF00076 rrm:RNA recognition motif                                              | 256770_at   | -0.8 |
| membrane import protein, putative similar to membrane import protein GB:AAF20172 GI:6636407 [Drosophila melanogaster]; supported by cDN/             | 256628_at   | -0.8 |
| At14a-1 protein identical to At14a protein GB:AAD26355 GI:4589123 [Arabidopsis thaliana] [Gene 230 (1), 33-40 (1999)]                                | 256601_s_at | -0.8 |
| 6-phosphogluconate dehydrogenase, putative similar to 6-phosphogluconate dehydrogenase GB:BAA22812 GI:2529229 [Glycine max];supporte                 | 256328_at   | -0.8 |
| integral membrane protein, putative contains Pfam profile: PF00892 Integral membrane protein DUF6                                                    | 256250_at   | -0.8 |
| guanine nucleotide-binding protein, putative similar to guanine nucleotide-binding protein GI:9294068 from [Arabidopsis thaliana]; supported by fi   | 256144_at   | -0.8 |
| amino acid permease I identical to amino acid permease I GI:22641 from [Arabidopsis thaliana]; supported by cDNA: gi_404018_gb_L16240.1_A            | 256022_at   | -0.8 |
| hypothetical protein contains Pfam profile: PF00650 CRAL/TRIO domain                                                                                 | 255923_at   | -0.8 |

|                                                                                                                                                                     |             |      |
|---------------------------------------------------------------------------------------------------------------------------------------------------------------------|-------------|------|
| sterol-C-methyltransferase identical to sterol-C-methyltransferase GI:1061040 from [Arabidopsis thaliana];supported by full-length cDNA: Ceres:2                    | 255885_at   | -0.8 |
| transcription factor, putative similar to transcription factor BTF3 homolog GI:2982299 from [Picea mariana];supported by full-length cDNA: Ceres:                   | 255902_at   | -0.8 |
| MAP kinase 4 (MPK4) ;supported by full-length cDNA: Ceres:7653.                                                                                                     | 255624_at   | -0.8 |
| predicted protein of unknown function similar to M. truncatula MtN21, GenBank accession number Y15293; F11O4.14 was picked up in a screer                           | 255578_at   | -0.8 |
| drought-induced-19-like 1 similar to drought-induced-19, GenBank accession number X78584 similar to F2P16.10, GenBank accession number :                            | 255504_at   | -0.8 |
| Expressed protein ; supported by cDNA: gi_16226696_gb_AF428466.1_AF428466                                                                                           | 255436_at   | -0.8 |
| putative glucan synthase component similar to 1,3-beta glucan synthase                                                                                              | 255378_at   | -0.8 |
| putative receptor-like protein kinase                                                                                                                               | 255344_s_at | -0.8 |
| putative phosphatidylglycerotransferase similar to CDP-diacylglycerol-glycerol-3-phosphate 3-phosphatidyltransferase of Synechocystis sp. GenB                      | 255300_at   | -0.8 |
| putative protein RNA helicase -Mus musculus,PIR2:I84741                                                                                                             | 255053_at   | -0.8 |
| H <sup>+</sup> -transporting ATPase chain E, vacuolar                                                                                                               | 254903_at   | -0.8 |
| beta-adaptin - like protein beta-adaptin -Homo sapiens,PID:g179333; supported by cDNA: gi_7385052_gb_AF216386.1_AF216386                                            | 254925_at   | -0.8 |
| fatty acid elongase - like protein (cer2-like) cer2, Arabidopsis thaliana, X93080                                                                                   | 254737_at   | -0.8 |
| Expressed protein ; supported by full-length cDNA: Ceres: 266299.                                                                                                   | 254505_at   | -0.8 |
| putative protein oxysterol-binding protein, Homo sapiens, PIR2:A34581; supported by cDNA: gi_15450518_gb_AY052361.1_                                                | 254329_at   | -0.8 |
| putative protein hypothetical protein - Caenorhabditis elegans,PID:e1350884;supported by full-length cDNA: Ceres:8254.                                              | 254165_at   | -0.8 |
| putative protein ClpC protease - Spinacia oleracea,PID:g4105131; supported by full-length cDNA: Ceres: 28122.                                                       | 254072_at   | -0.8 |
| putative protein qkl-7, Mus musculus                                                                                                                                | 253964_at   | -0.8 |
| putative protein 150-kD protein, Dictyostelium discoideum, gb:U49332                                                                                                | 253849_at   | -0.8 |
| hexokinase ; supported by cDNA: gi_8567421_gb_U18754.2_ATU18754                                                                                                     | 253705_at   | -0.8 |
| cellulose synthase catalytic subunit (RSW1)                                                                                                                         | 253428_at   | -0.8 |
| putative protein mRNA for KIAA0079 gene, Homo sapiens                                                                                                               | 253448_at   | -0.8 |
| carbonate dehydratase - like protein carbonate dehydratase precursor, Spinacia oleracea,PIr2:S28797;supported by full-length cDNA: Ceres:658                        | 253300_at   | -0.8 |
| probable H <sup>+</sup> -transporting ATPase H <sup>+</sup> -transporting ATPase (EC 3.6.1.35) 57K chain - Arabidopsis thaliana, PIR2:A31886; supported by cDNA: gi | 252998_at   | -0.8 |
| small auxin up RNA (SAUR-AC1) ;supported by full-length cDNA: Ceres:14973.                                                                                          | 252970_at   | -0.8 |
| glucose-1-phosphate adenylyltransferase (APL3) ; supported by cDNA: gi_16648984_gb_AY059862.1_                                                                      | 252888_at   | -0.8 |
| histone H2B -like protein histone H2B1, upland cotton, PIR:T09722;supported by full-length cDNA: Ceres:10517.                                                       | 252560_at   | -0.8 |
| actin depolymerizing factor 1 (ADF1) ;supported by full-length cDNA: Ceres:1907.                                                                                    | 252564_at   | -0.8 |
| starch phosphorylase H (cytosolic form) - like protein starch phosphorylase H, cytosolic isoform, Vicia faba, PIR:T12091; supported by cDNA: gi_                    | 252468_at   | -0.8 |
| protein translocation complex sec61 gamma chain-like protein protein translocation complex sec61 gamma chain, endoplasmic reticulum - Canis                         | 252324_at   | -0.8 |
| 30S ribosomal protein S9 -like similar to 30S ribosomal proteins                                                                                                    | 252287_at   | -0.8 |
| R2R3-MYB transcription factor ; supported by cDNA: gi_15983427_gb_AF424588.1_AF424588                                                                               | 252193_at   | -0.8 |
| hypothetical protein                                                                                                                                                | 252073_at   | -0.8 |
| fructose-bisphosphatase precursor ; supported by cDNA: gi_14532619_gb_AY039934.1_                                                                                   | 251885_at   | -0.8 |
| putative protein                                                                                                                                                    | 251869_at   | -0.8 |
| putative protein In2-1 protein, Zea mays, P49248                                                                                                                    | 251820_at   | -0.8 |
| methionyl-tRNA synthetase (AcpMetRS) ; supported by cDNA: gi_13605909_gb_AF367354.1_AF367354                                                                        | 251807_at   | -0.8 |
| bZIP protein ; supported by cDNA: gi_600854_gb_U17887.1_ATU17887                                                                                                    | 251413_at   | -0.8 |
| putative protein prib5, Ribes nigrum, EMBL:RNI7578;supported by full-length cDNA: Ceres:15792.                                                                      | 251370_at   | -0.8 |
| putative protein polygalacturonase - Lycopersicon esculentum, EMBL:AF118567; supported by cDNA: gi_13358184_gb_AF324992.2_AF324992                                  | 251261_at   | -0.8 |
| ABC transporter-like protein glutathione-conjugate transporter AtMRP4 - Arabidopsis thaliana, EMBL:AJ002584                                                         | 251227_at   | -0.8 |
| lectin - like protein lectin precursor LECSJAbmII, Sophora japonica, EMBL:SJU63012;supported by full-length cDNA: Ceres:41306.                                      | 251140_at   | -0.8 |
| putative protein contains transmembrane region and ATP binding region, Mus musculus, EMBL:AB030189.1                                                                | 250978_at   | -0.8 |
| putative protein various predicted proteins, Arabidopsis thaliana; supported by cDNA: gi_15982839_gb_AY057527.1_                                                    | 250939_at   | -0.8 |



|                                                                                                                                              |             |      |
|----------------------------------------------------------------------------------------------------------------------------------------------|-------------|------|
| putative protein ; supported by cDNA: gi_14596134_gb_AY042855.1_                                                                             | 250898_at   | -0.8 |
| coatomer delta subunit (delta-coat protein) (delta-COP) ; supported by cDNA: gi_15450768_gb_AY054464.1_                                      | 250816_at   | -0.8 |
| cellulose synthase catalytic subunit (gb AAC39336.1) ; supported by cDNA: gi_2827142_gb_AF027174.1_AF027174                                  | 250827_at   | -0.8 |
| cellulose synthase catalytic subunit                                                                                                         | 250505_at   | -0.8 |
| argininosuccinate lyase (AtArgH) ; supported by cDNA: gi_15028082_gb_AY045898.1_                                                             | 250403_at   | -0.8 |
| putative protein synaptobrevin-like protein Syb1, Mus musculus, EMBL:MMU133536                                                               | 250412_at   | -0.8 |
| 2-oxoglutarate/malate translocator precursor -like protein 2-oxoglutarate/malate translocator precursor, spinach, SWISSPROT:SOT1_SPIOL; su   | 250278_at   | -0.8 |
| putative protein similar to unknown protein (gb AAF01580.1)                                                                                  | 249835_s_at | -0.8 |
| unknown protein ;supported by full-length cDNA: Ceres:25723.                                                                                 | 249811_at   | -0.8 |
| glucose-6-phosphate dehydrogenase ;supported by full-length cDNA: Ceres:22483.                                                               | 249694_at   | -0.8 |
| 14-3-3 protein GF14psi (grf3/RC11) identical to 14-3-3 protein GF14 psi GI:1168200, SP:P42644; supported by cDNA: gi_166716_gb_L09110.1_     | 249514_at   | -0.8 |
| ribosomal protein L5 - like ribosomal protein L5, rice                                                                                       | 249466_at   | -0.8 |
| putative protein ; supported by cDNA: gi_15010731_gb_AY045667.1_                                                                             | 249442_at   | -0.8 |
| dihydroxyacetone 3-phosphate reductase (dhaprd)                                                                                              | 249366_at   | -0.8 |
| putative protein similar to unknown protein (emb CAB89401.1)                                                                                 | 249071_at   | -0.8 |
| NBD-like protein (gb AAD20643.1) ;supported by full-length cDNA: Ceres:33802.                                                                | 249063_at   | -0.8 |
| unknown protein ;supported by full-length cDNA: Ceres:21404.                                                                                 | 249007_at   | -0.8 |
| putative protein strong similarity to unknown protein (pir T05325); supported by cDNA: gi_13605502_gb_AF361577.1_AF361577                    | 249011_at   | -0.8 |
| putative protein similar to unknown protein (pir T04881)                                                                                     | 249021_at   | -0.8 |
| putative protein contains similarity to unknown;supported by full-length cDNA: Ceres:4029.                                                   | 249025_at   | -0.8 |
| putative protein strong similarity to unknown protein (pir T04426)                                                                           | 248945_at   | -0.8 |
| putative protein similar to unknown protein (pir G71444);supported by full-length cDNA: Ceres:19104.                                         | 248797_at   | -0.8 |
| ATP citrate lyase ; supported by cDNA: gi_14334787_gb_AY035067.1_                                                                            | 248608_at   | -0.8 |
| putative protein similar to unknown protein (pir S75732);supported by full-length cDNA: Ceres:35710.                                         | 248537_at   | -0.8 |
| protein phosphatase 2C-like ; supported by cDNA: gi_15027924_gb_AY045819.1_                                                                  | 248249_at   | -0.8 |
| thylakoid lumenal 17.4 kD protein, chloroplast precursor (P17.4) (sp P81760) ; supported by cDNA: gi_13899114_gb_AF370552.1_AF370552         | 248224_at   | -0.8 |
| putative protein similar to unknown protein (pir T04261);supported by full-length cDNA: Ceres:6181.                                          | 247930_at   | -0.8 |
| unknown protein                                                                                                                              | 247907_at   | -0.8 |
| putative protein similar to unknown protein (pir D64592);supported by full-length cDNA: Ceres:113904.                                        | 247881_at   | -0.8 |
| SPP30 - like protein SPP30, Solanum chacoense, EMBL:AF136010;supported by full-length cDNA: Ceres:269675.                                    | 247842_at   | -0.8 |
| putative protein predicted proteins, Arabidopsis thaliana                                                                                    | 247770_at   | -0.8 |
| putative protein protein tyrosine phosphatase-like protein, PTPLB, Mus musculus, EMBL:AF169286                                               | 247689_at   | -0.8 |
| putative protein various predicted proteins, Arabidopsis thaliana;supported by full-length cDNA: Ceres:251668.                               | 247607_at   | -0.8 |
| putative protein various predicted proteins from different species; supported by cDNA: gi_15912286_gb_AY056421.1_                            | 247555_at   | -0.8 |
| glutamate-tRNA ligase ; supported by cDNA: gi_11078545_gb_AF241841.1_AF241841                                                                | 247319_at   | -0.8 |
| ZW10-like protein ; supported by cDNA: gi_14334941_gb_AY035144.1_                                                                            | 247261_at   | -0.8 |
| receptor protein kinase-like protein                                                                                                         | 247153_at   | -0.8 |
| natural resistance-associated macrophage protein ; supported by cDNA: gi_6468013_gb_AF202540.1_AF202540                                      | 247001_at   | -0.8 |
| putative multispinning membrane protein GC donor splice site at exon 6; KIAA0255 - Homo sapiens, EMBL:D87444; supported by cDNA: gi_134      | 246923_at   | -0.8 |
| ferrochelatase-l                                                                                                                             | 246870_at   | -0.8 |
| glutathione synthetase gsh2 non-consensus AT donor splice site at exon 6, AC acceptor splice site at exon 7; supported by cDNA: gi_758451_gt | 246785_at   | -0.8 |
| acetyl-CoA carboxylase ;supported by full-length cDNA: Ceres:20286.                                                                          | 246613_at   | -0.8 |
| putative protein geranylgeranylated protein NTGP5 - Nicotiana tabacum, EMBL:U64926; supported by full-length cDNA: Ceres: 250561.            | 246539_at   | -0.8 |
| cyclic nucleotide-gated cation channel ; supported by cDNA: gi_3894398_gb_AF067798.1_AF067798                                                | 246510_at   | -0.8 |

|                                                                                                                                                                                |             |      |
|--------------------------------------------------------------------------------------------------------------------------------------------------------------------------------|-------------|------|
| acetyltransferase-like protein Glucosamine-6-phosphate acetyltransferase EMeg32 protein - <i>Mus musculus</i> , EMBL:AJ001006                                                  | 246518_at   | -0.8 |
| quinone oxidoreductase - like protein probable quinone oxidoreductase (EC 1.6.5.5) P1, <i>Arabidopsis thaliana</i> , PIR:S57612;supported by full-leng                         | 246417_at   | -0.8 |
| glucose 6 phosphate/phosphate translocator-like protein glucose 6 phosphate/phosphate translocator - <i>Arabidopsis thaliana</i> , EMBL:AF233658; s                            | 246445_at   | -0.8 |
| integral membrane protein, putative similar to integral membrane protein GI:3288599 from [ <i>Rattus norvegicus</i> ]; supported by full-length cDNA: C                        | 246378_at   | -0.8 |
| chlorophyll synthetase ; supported by cDNA: gi_14596066_gb_AY042821.1_                                                                                                         | 246308_at   | -0.8 |
| lipophosphoglycan biosynthetic protein - like lipophosphoglycan biosynthetic protein (LPG2), <i>Leishmania donovani</i> , TREMBL:LD26175                                       | 246143_at   | -0.8 |
| dynein light chain - like protein dynein light chain LC6, <i>Anthocidaris crassispina</i> , EMBL:AB004830                                                                      | 246144_at   | -0.8 |
| putative protein predicted protein, <i>Oryza sativa</i> ; supported by cDNA: gi_15146277_gb_AY049280.1_                                                                        | 246126_at   | -0.8 |
| putative protein karyopherin beta 3 - <i>Homo sapiens</i> , EMBL:U72761; supported by cDNA: gi_14334741_gb_AY035044.1_                                                         | 245941_at   | -0.8 |
| putative transcriptional co-activator (KIWI) ; supported by cDNA: gi_2997683_gb_AF053302.1_AF053302                                                                            | 245896_at   | -0.8 |
| unknown protein ;supported by full-length cDNA: Ceres:21415.                                                                                                                   | 245626_at   | -0.8 |
| transport protein                                                                                                                                                              | 245625_at   | -0.8 |
| disease resistance RPP5 like protein                                                                                                                                           | 245456_at   | -0.8 |
| Expressed protein ; supported by full-length cDNA: Ceres: 12256.                                                                                                               | 245367_at   | -0.8 |
| selenium-binding protein like ; supported by cDNA: gi_14532843_gb_AY040046.1_                                                                                                  | 245285_s_at | -0.8 |
| ATP-sulfurylase ; supported by cDNA: gi_459143_gb_U06275.1_ATU06275                                                                                                            | 245254_at   | -0.8 |
| putative protein similarity to sec10, <i>Drosophila melanogaster</i> , AE003746~Contains Putative AMP-binding domain signature AA505-516                                       | 245211_at   | -0.8 |
| putative Ca <sup>2+</sup> -ATPase ; supported by cDNA: gi_11493642_gb_AF200739.1_AF200739                                                                                      | 245117_at   | -0.8 |
| GDP-mannose pyrophosphorylase updated per Conklin PL et al, PNAS 1999, 96(7):4198-203;supported by full-length cDNA: Ceres:37775.                                              | 245060_at   | -0.8 |
| heme oxygenase 2 (HO2)                                                                                                                                                         | 245027_at   | -0.8 |
| PSI I protein                                                                                                                                                                  | 245017_at   | -0.8 |
| PSII 47KDa protein                                                                                                                                                             | 244972_at   | -0.8 |
| ribosomal protein S8                                                                                                                                                           | 244981_at   | -0.8 |
| NADH dehydrogenase ND4L                                                                                                                                                        | 244933_at   | -0.8 |
| unknown protein ; supported by cDNA: gi_14334723_gb_AY035035.1_                                                                                                                | 264485_at   | -0.8 |
| putative WRKY-type DNA binding protein ; supported by cDNA: gi_15430276_gb_AY046275.1_                                                                                         | 263783_at   | -0.8 |
| hypothetical protein                                                                                                                                                           | 262062_s_at | -0.8 |
| putative isocitrate dehydrogenase (NAD <sup>+</sup> ) similar to isocitrate dehydrogenase (NAD <sup>+</sup> ) GB:CAA65502 [ <i>Nicotiana tabacum</i> ];supported by full-lengt | 258655_at   | -0.8 |
| GTP-binding protein rab11 - like GTP-binding protein rab11, <i>Arabidopsis thaliana</i> , PIR:T12965; supported by cDNA: gi_13877728_gb_AF370127                               | 247722_at   | -0.8 |
| Expressed protein ; supported by full-length cDNA: Ceres: 7632.                                                                                                                | 245338_at   | -0.8 |
| unknown protein                                                                                                                                                                | 267516_at   | -0.7 |
| putative UDP-N-acetylglucosamine pyrophosphorylase ;supported by full-length cDNA: Ceres:5509.                                                                                 | 267432_at   | -0.7 |
| hypothetical protein predicted by genscan;supported by full-length cDNA: Ceres:33701.                                                                                          | 267361_at   | -0.7 |
| similar to cold acclimation protein WCOR413 [ <i>Triticum aestivum</i> ]                                                                                                       | 267288_at   | -0.7 |
| Ran binding protein (AtRanBP1b) identical to GB:X97378                                                                                                                         | 267306_at   | -0.7 |
| glutathione S-transferase identical to GB:Y12295; supported by cDNA: gi_13926309_gb_AF372905.1_AF372905                                                                        | 267153_at   | -0.7 |
| putative MYB family transcription factor ; supported by cDNA: gi_5823324_gb_AF175996.1_AF175996                                                                                | 267157_at   | -0.7 |
| putative cytochrome P450 ;supported by full-length cDNA: Ceres:158108.                                                                                                         | 266996_at   | -0.7 |
| hypothetical protein predicted by genscan                                                                                                                                      | 267019_at   | -0.7 |
| putative trans-prenyltransferase                                                                                                                                               | 266958_at   | -0.7 |
| putative ATP-dependent RNA helicase ; supported by cDNA: gi_14532475_gb_AY039862.1_                                                                                            | 266896_at   | -0.7 |
| unknown protein                                                                                                                                                                | 266858_at   | -0.7 |
| putative AP2 domain transcription factor pFAM domain (PF00847)supported by full-length cDNA: Ceres:31044.                                                                      | 266820_at   | -0.7 |
| hypothetical protein predicted by grail                                                                                                                                        | 266439_s_at | -0.7 |

|                                                                                                                                                   |             |      |
|---------------------------------------------------------------------------------------------------------------------------------------------------|-------------|------|
| hypothetical protein predicted by genscan and genefinder                                                                                          | 266320_at   | -0.7 |
| putative rac GTPase activating protein                                                                                                            | 266324_at   | -0.7 |
| putative chorismate mutase/prephenate dehydratase ;supported by full-length cDNA: Ceres:37739.                                                    | 266257_at   | -0.7 |
| putative carbonyl reductase                                                                                                                       | 266015_at   | -0.7 |
| unknown protein ;supported by full-length cDNA: Ceres:98881.                                                                                      | 265959_at   | -0.7 |
| putative peptidyl-prolyl cis-trans isomerase similar to ESS1 (S.cerevisiae) and dodo (D.melanogaster.); supported by full-length cDNA: Ceres: 126 | 265818_at   | -0.7 |
| unknown protein ;supported by full-length cDNA: Ceres:1697.                                                                                       | 265716_at   | -0.7 |
| unknown protein ;supported by full-length cDNA: Ceres:15582.                                                                                      | 265669_at   | -0.7 |
| putative purine-rich single-stranded DNA-binding protein ; supported by cDNA: gi_15450692_gb_AY052714.1_                                          | 265677_at   | -0.7 |
| F-box protein family, AtFBL6 contains similarity to grr1 GI:2407790 from [Glycine max]                                                            | 265633_at   | -0.7 |
| unknown protein predicted by genefinder                                                                                                           | 265283_at   | -0.7 |
| unknown protein ; supported by full-length cDNA: Ceres: 29227.                                                                                    | 265116_at   | -0.7 |
| myrosinase binding protein, putative similar to myrosinase binding protein GI:1711295 from [Brassica napus]                                       | 265053_at   | -0.7 |
| unknown protein similar to putative uridylyl transferase GI:4406764 from [Arabidopsis thaliana];supported by full-length cDNA: Ceres:40049.       | 264956_at   | -0.7 |
| hypothetical protein predicted by genemark.hmm; supported by cDNA: gi_13926194_gb_AF370571.1_AF370571                                             | 264959_at   | -0.7 |
| unknown protein Location of EST gb Z26015 and gb Z26014~CO2H end of protein is similar to procaryote ribosomal protein L19; supported by c        | 264874_at   | -0.7 |
| putative superoxide-generating NADPH oxidase flavocytochrome highly similar to GB:CAA70769, FRO1 and GB:CAA70770, FRO2 from [Arabid               | 264751_at   | -0.7 |
| flowering signals mediating protein FT identical to flowering signals mediating protein FT GI:4903012 from [Arabidopsis thaliana]; supported by c | 264638_at   | -0.7 |
| unknown protein Location of EST gb T41885 and gb AA395021                                                                                         | 264521_at   | -0.7 |
| hypothetical protein predicted by genscan                                                                                                         | 264114_at   | -0.7 |
| putative peroxidase ;supported by full-length cDNA: Ceres:113695.                                                                                 | 264001_at   | -0.7 |
| hypothetical protein predicted by genefinder;supported by full-length cDNA: Ceres:2576.                                                           | 263929_at   | -0.7 |
| putative ATP synthase ;supported by full-length cDNA: Ceres:31766.                                                                                | 263874_at   | -0.7 |
| unknown protein ; supported by cDNA: gi_15027948_gb_AY045831.1_                                                                                   | 263844_at   | -0.7 |
| putative tyrosine aminotransferase ; supported by cDNA: gi_15293106_gb_AY050987.1_                                                                | 263714_at   | -0.7 |
| putative aspartate kinase-homoserine dehydrogenase almost identical to gb X71364 gene for aspartate kinase homoserine dehydrogenase from ,        | 263696_at   | -0.7 |
| NAM (no apical meristem)-like protein similar to petunia NAM (X92205) and A. thaliana sequences ATAF1 (X74755) and ATAF2 (X74756); proba          | 263584_at   | -0.7 |
| unknown protein ; supported by cDNA: gi_13605844_gb_AF367321.1_AF367321                                                                           | 263499_at   | -0.7 |
| putative beta-hydroxyacyl-ACP dehydratase ; supported by full-length cDNA: Ceres: 30185.                                                          | 263432_at   | -0.7 |
| hypothetical protein similar to hypothetical protein GB:AAC27412                                                                                  | 263405_s_at | -0.7 |
| putative histone H2B ;supported by full-length cDNA: Ceres:14965.                                                                                 | 263412_at   | -0.7 |
| unknown protein ;supported by full-length cDNA: Ceres:120231.                                                                                     | 263303_at   | -0.7 |
| putative inositol 1,4,5-trisphosphate 5-phosphatase Highly similar to arabidopsis inositol 1,4,5-trisphosphate 5-phosphatase, gi 4688596          | 263202_at   | -0.7 |
| acetyl-CoA carboxylase, putative similar to acetyl-CoA carboxylase GI:1100253 from [Arabidopsis thaliana]                                         | 263193_at   | -0.7 |
| RSH3 (RelA/SpoT homolog) identical to RSH3 (RelA/SpoT homolog) GI:7141308 from [Arabidopsis thaliana]; supported by cDNA: gi_7141307_g            | 263159_at   | -0.7 |
| hypothetical protein similar to hypothetical ABC transporter ATP-binding protein GI:9955395 from [Microcystis aeruginosa]                         | 263000_at   | -0.7 |
| unknown protein strong similarity to gi 3367522 F8K4.9 from Arabidopsis thaliana BAC gb AC004392. EST gb W43487 comes from this gene              | 262813_at   | -0.7 |
| putative protein kinase                                                                                                                           | 262660_at   | -0.7 |
| unknown protein Contains a PF 00175 Oxidoreductase FAD/NADH-binding domain. ESTs gb H76345 and gb AA651465 come from this gene; su                | 262572_at   | -0.7 |
| SOUL-like protein Similar to SOUL Protein [Mus musculus] (gi 4886906) and [Homo sapiens] (gi 4886910). Location of ests PAP043 5 (gb Z270         | 262536_at   | -0.7 |
| chloroplast FtsH protease almost identical to chloroplast FtsH protease GI:1483215, SP:Q39102 from [Arabidopsis thaliana]                         | 262473_at   | -0.7 |
| acyl CoA synthetase, putative similar to acyl CoA synthetase GI:1617267 from [Brassica napus]                                                     | 262414_at   | -0.7 |
| hypothetical protein similar to hypothetical protein GB:AAF24576 GI:6692111 from [Arabidopsis thaliana]                                           | 262329_at   | -0.7 |
| phosphoglucomutase, putative similar to phosphoglucomutase GI:534981 from [Spinacia oleracea]                                                     | 262309_at   | -0.7 |

|                                                                                                                                                    |             |      |
|----------------------------------------------------------------------------------------------------------------------------------------------------|-------------|------|
| unknown protein ; supported by cDNA: gi_16648825_gb_AY058190.1_                                                                                    | 262232_at   | -0.7 |
| hypothetical protein similar to hypothetical protein GI:9294146 from [Arabidopsis thaliana]                                                        | 262236_at   | -0.7 |
| elongation factor, putative similar to ELONGATION FACTOR 2 GB:O14460 from [Schizosaccharomyces pombe]; supported by cDNA: gi_143346                | 262064_at   | -0.7 |
| unknown protein ;supported by full-length cDNA: Ceres:126074.                                                                                      | 261852_at   | -0.7 |
| endo-xyloglucan transferase, putative similar to endo-xyloglucan transferase GI:2244732 from [Gossypium hirsutum];supported by full-length cDN     | 261825_at   | -0.7 |
| UDP glucose:flavonoid 3-o-glucosyltransferase, putative similar to UDP glucose:flavonoid 3-o-glucosyltransferase GB:AAB81683 GI:2564114 fro        | 261804_at   | -0.7 |
| clathrin coat assembly protein AP17, putative similar to clathrin coat assembly protein AP17 GB:CAA65533 GI:2959358 from [Zea mays]                | 261733_at   | -0.7 |
| Mg-chelatase, putative similar to Mg-chelatase GB:AF014399 GI:2318116 from [Pisum sativum]; supported by cDNA: gi_16649072_gb_AY0599(              | 261695_at   | -0.7 |
| DNA binding protein ACBF, putative similar to DNA binding protein ACBF GB:U90212 GI:1899187 from [Nicotiana tabacum]                               | 261603_at   | -0.7 |
| poly(A)-binding protein, putative similar to poly(A)-binding protein GB:AAF66825 GI:7673359 from [Nicotiana tabacum]; supported by cDNA: gi_1      | 261614_at   | -0.7 |
| tumor suppressor, putative similar to tumor suppressor GI:575354 from [Oryza sativa]; supported by cDNA: gi_14190448_gb_AF378902.1_AF37            | 261490_at   | -0.7 |
| unknown protein                                                                                                                                    | 261469_at   | -0.7 |
| hypothetical protein predicted by genemark.hmm; supported by full-length cDNA: Ceres: 17148.                                                       | 261440_at   | -0.7 |
| hypothetical protein contains similarity to ABC transporter GI:10175329 from [Bacillus halodurans]; supported by cDNA: gi_14532489_gb_AY039(       | 261353_at   | -0.7 |
| vacuolar ATP synthase subunit C, putative similar to GB:AAF20146 from [Arabidopsis thaliana] (Genes Dev. (1999) In press); supported by cDN        | 261210_at   | -0.7 |
| unknown protein ; supported by full-length cDNA: Ceres: 12477.                                                                                     | 261148_at   | -0.7 |
| chloroplast nucleoid DNA binding protein, putative similar to chloroplast nucleoid DNA binding protein GB:BAA22813 GI:2541876 from [Nicotiana      | 261055_at   | -0.7 |
| alanine aminotransferase, putative similar to alanine aminotransferase GB:AAC62456 GI:3694807 from [Zea mays]                                      | 260847_s_at | -0.7 |
| 14-3-3 protein GF14omega (grf2) identical to GF14omega isoform GI:487791 from [Arabidopsis thaliana];supported by full-length cDNA: Ceres:2(       | 260775_at   | -0.7 |
| protein phosphatase 2C, putative similar to protein phosphatase 2C GI:3242077 from (Arabidopsis thaliana)                                          | 260712_at   | -0.7 |
| hypothetical protein predicted by genemark.hmm                                                                                                     | 260645_at   | -0.7 |
| putative monodehydroascorbate reductase similar to monodehydroascorbate reductase GB:AAD28178 [Brassica juncea]; supported by cDNA: gi_            | 260325_at   | -0.7 |
| unknown protein ; supported by full-length cDNA: Ceres: 10531.                                                                                     | 260200_at   | -0.7 |
| putative UDP-N-acetylglucosamine--N-acetylmuramyl-(pentapeptide)-pyrophosphoryl-undecaprenol N-acetylglucosamine transferase similar to pi         | 260047_at   | -0.7 |
| unknown protein ;supported by full-length cDNA: Ceres:111031.                                                                                      | 260003_at   | -0.7 |
| unknown protein ;supported by full-length cDNA: Ceres:36337.                                                                                       | 260009_at   | -0.7 |
| auxin-induced protein, putative similar to SP:P33083 from [Glycine max];supported by full-length cDNA: Ceres:4119.                                 | 259790_s_at | -0.7 |
| hypothetical protein predicted by genefinder                                                                                                       | 259743_at   | -0.7 |
| spore coat protein-like protein similar to SPORE COAT PROTEIN A GB:P07788 from [Bacillus subtilis] and BILIRUBIN OXIDASE GB:Q12737 [M              | 259752_at   | -0.7 |
| putative AUX1-like permease similar to AUX1 (regulator of root gravitropism, putative permease) GB:CAA67308 [Arabidopsis thaliana]; supporte       | 259680_at   | -0.7 |
| myosin-like protein contains Pfam profile: PF00658 Poly-adenylate binding protein, unique domain.; supported by cDNA: gi_15081708_gb_AY04          | 259609_at   | -0.7 |
| unknown protein                                                                                                                                    | 259577_at   | -0.7 |
| hypothetical protein similar to ripening-induced protein [Fragaria vesca] GI:2465015;supported by full-length cDNA: Ceres:16091.                   | 259548_at   | -0.7 |
| inorganic pyrophosphatase, putative similar to inorganic pyrophosphatase GI:790478 from [Nicotiana tabacum]; supported by cDNA: gi_166633_         | 259504_at   | -0.7 |
| hypothetical protein predicted by genemark.hmm                                                                                                     | 259450_at   | -0.7 |
| putative cationic amino acid transporter similar to HIGH-AFFINITY CATIONIC AMINO ACID TRANSPORTER-1 GB:Q09143 [Mus musculus]                       | 259337_at   | -0.7 |
| hypothetical protein predicted by genscan                                                                                                          | 259295_at   | -0.7 |
| putative cystathionine gamma-synthase similar to cystathionine gamma-synthase GB:AAB41235 from [Arabidopsis thaliana]; supported by cDNA:          | 259279_at   | -0.7 |
| unknown protein est hit, predicted by genscan                                                                                                      | 259190_at   | -0.7 |
| putative 60S ribosomal protein L22 similar to 60S ribosomal protein L22 GB:AAF02883; supported by full-length cDNA: Ceres: 8244.                   | 259112_at   | -0.7 |
| unknown protein similar to unknown protein GB:AAC62613 [Arabidopsis thaliana]; supported by cDNA: gi_14532567_gb_AY039908.1_                       | 259018_at   | -0.7 |
| hevein-like protein precursor (PR-4) identical to hevein-like protein precursor GB:P43082 [Arabidopsis thaliana], similar to wound-induced protein | 258791_at   | -0.7 |
| putative T-complex protein 1, theta subunit (TCP-1-Theta) similar to T-complex protein 1, theta subunit (TCP-1-Theta) GB:P42932 [Mus musculu       | 258816_at   | -0.7 |
| unknown protein                                                                                                                                    | 258761_at   | -0.7 |

|                                                                                                                                                                                 |             |      |
|---------------------------------------------------------------------------------------------------------------------------------------------------------------------------------|-------------|------|
| putative oxidoreductase similar to phytoene desaturase GB:P28553 from [Glycine max];supported by full-length cDNA: Ceres:17350.                                                 | 258708_at   | -0.7 |
| putative calmodulin similar to calmodulin GB:P04352 [Chlamydomonas reinhardtii]; contains Pfam profile: PF00036 EF hand (4 copies); supported by full-length cDNA: Ceres:37856. | 258617_at   | -0.7 |
| beta-glucosidase, putative similar to beta-glucosidase GB:AAF23823 from [Arabidopsis thaliana];supported by full-length cDNA: Ceres:37856.                                      | 258512_at   | -0.7 |
| hypothetical protein ;supported by full-length cDNA: Ceres:2064.                                                                                                                | 258150_at   | -0.7 |
| putative tyrosine phosphatase similar to GB:AAF08382 from [Drosophila melanogaster]                                                                                             | 258007_at   | -0.7 |
| unknown protein                                                                                                                                                                 | 257903_at   | -0.7 |
| hypothetical protein predicted by genemark.hmm                                                                                                                                  | 257723_at   | -0.7 |
| unknown protein contains Pfam profile: PF00168 C2 domain; supported by cDNA: gi_15983786_gb_AY056799.1_                                                                         | 257734_at   | -0.7 |
| 60S ribosomal protein, putative similar to 60S RIBOSOMAL PROTEIN L13A GB:P35427 from [Rattus norvegicus];supported by full-length cDNA                                          | 257599_at   | -0.7 |
| phosphate transporter, putative contains Pfam profile: PF01384 phosphate transporter family                                                                                     | 257311_at   | -0.7 |
| unknown protein ; supported by full-length cDNA: Ceres: 105122.                                                                                                                 | 257300_at   | -0.7 |
| hypothetical protein ;supported by full-length cDNA: Ceres:9965.                                                                                                                | 257093_at   | -0.7 |
| unknown protein contains Pfam profile: PF00153 mitochondrial carrier proteins;supported by full-length cDNA: Ceres:39353.                                                       | 256819_at   | -0.7 |
| dirigent protein, putative similar to dirigent protein GB:AAF25365 from [Thuja plicata]                                                                                         | 256781_at   | -0.7 |
| unknown protein ;supported by full-length cDNA: Ceres:108144.                                                                                                                   | 256786_at   | -0.7 |
| unknown protein                                                                                                                                                                 | 256673_at   | -0.7 |
| histone H2A, putative similar to histone H2A GB:AAF64418 GI:7595337 from [Arabidopsis thaliana] (Proc. Natl. Acad. Sci. U.S.A. 97 (2), 948-953)                                 | 256666_at   | -0.7 |
| unknown protein                                                                                                                                                                 | 256633_at   | -0.7 |
| unknown protein                                                                                                                                                                 | 256489_at   | -0.7 |
| myb-related protein similar to GI:7981380 from [Lycopersicon esculentum]                                                                                                        | 256503_at   | -0.7 |
| adenylosuccinate lyase - like protein adenylosuccinate lyase - Haemophilus influenzae                                                                                           | 256461_s_at | -0.7 |
| expansin (At-EXP1) identical to expansin (At-EXP1) [Arabidopsis thaliana] GI:1041702;supported by full-length cDNA: Ceres:255048.                                               | 256299_at   | -0.7 |
| MAP kinase kinase 4 (ATMKK4) identical to MAP kinase kinase 4 [Arabidopsis thaliana]; supported by cDNA: gi_13265419_gb_AF324667.2_AF324667                                     | 256183_at   | -0.7 |
| pyruvate dehydrogenase E1 beta subunit, putative similar to pyruvate dehydrogenase E1 beta subunit GI:2982328 from [Picea mariana];supported by full-length cDNA: Ceres:255048. | 256160_at   | -0.7 |
| unknown protein                                                                                                                                                                 | 256049_at   | -0.7 |
| hypothetical protein ;supported by full-length cDNA: Ceres:7642.                                                                                                                | 255981_at   | -0.7 |
| UDP-glucose glucosyltransferase identical to UDP-glucose glucosyltransferase GI:3928543 from [Arabidopsis thaliana]; supported by cDNA: gi_15209668_gb_AY045842.1_              | 255942_at   | -0.7 |
| ribosomal protein L20, putative similar to ribosomal protein L20 GI:3603025 from [Guillardia theta];supported by full-length cDNA: Ceres:255.                                   | 255767_at   | -0.7 |
| 3-phosphoserine phosphatase identical to 3-phosphoserine phosphatase GI:3759177 from [Arabidopsis thaliana];supported by full-length cDNA: Ceres:255.                           | 255778_at   | -0.7 |
| hypothetical protein                                                                                                                                                            | 255631_at   | -0.7 |
| putative glycosyltransferase similar to A. thaliana protein T20K9.11, GenBank accession number 3445207; supported by cDNA: gi_16209668_gb_AY045842.1_                           | 255483_at   | -0.7 |
| putative protein similar to T5J8.17                                                                                                                                             | 255451_at   | -0.7 |
| putative WD-repeat protein similar to L. erythrorhizon LEC14B, GenBank accession number Q40153                                                                                  | 255468_at   | -0.7 |
| putative malonyl-CoA decarboxylase                                                                                                                                              | 255327_at   | -0.7 |
| rab7 -like protein rab7 protein -Vigna aconitifolia,PIR2:S39567; supported by cDNA: gi_15718417_dbj_AB071851.1_AB071851                                                         | 255052_at   | -0.7 |
| RNA-binding protein ;supported by full-length cDNA: Ceres:2343.                                                                                                                 | 254990_at   | -0.7 |
| putative protein hypothetical protein - Brassica napus,PIR2:S42651                                                                                                              | 254928_at   | -0.7 |
| phospholipid hydroperoxide glutathione peroxidase ;supported by full-length cDNA: Ceres:8846.                                                                                   | 254890_at   | -0.7 |
| hypothetical protein                                                                                                                                                            | 254755_at   | -0.7 |
| putative protein various predicted 3-isopropylmalate dehydratases/aconitate hydratases; supported by cDNA: gi_15027970_gb_AY045842.1_                                           | 254742_at   | -0.7 |
| translation initiation factor eIF4E ;supported by full-length cDNA: Ceres:25447.                                                                                                | 254654_at   | -0.7 |
| ras-like GTP-binding protein strong homology to GTP-binding protein ric2, Oryza sativa, S38741                                                                                  | 254641_at   | -0.7 |
| heat shock transcription factor - like protein heat shock transcription factor, Zea mays, PIR2:S61448                                                                           | 254592_at   | -0.7 |
| hyuC-like protein 5-substituted hydantoins to the corresponding L-amino acids, Pseudomonas sp.,PIR2:D42594                                                                      | 254496_at   | -0.7 |

|                                                                                                                                                       |           |      |
|-------------------------------------------------------------------------------------------------------------------------------------------------------|-----------|------|
| putative protein sigma70 operon, <i>Staphylococcus aureus</i> , PATCHX:D1020251                                                                       | 254460_at | -0.7 |
| peroxidase prxr1 ;supported by full-length cDNA: Ceres:20758.                                                                                         | 254386_at | -0.7 |
| putative protein UDP-galactose transporter related isozyme 3, <i>Homo sapiens</i> , PIR2:JC5026                                                       | 254291_at | -0.7 |
| serine/threonine kinase - like protein serine/threonine kinase, <i>Brassica oleracea</i> ; supported by cDNA: gi_14423417_gb_AF386946.1_AF386946      | 254255_at | -0.7 |
| V-ATPase subunit G (vag2 gene)                                                                                                                        | 254216_at | -0.7 |
| calcium-dependent protein kinase (CDPK6) ;supported by full-length cDNA: Ceres:37278.                                                                 | 254224_at | -0.7 |
| brefeldin A-sensitive Golgi protein - like brefeldin A-sensitive Golgi protein LDLC, <i>Homo sapiens</i> , PIR2:A53542; supported by cDNA: gi_1360580 | 254087_at | -0.7 |
| putative protein cylicin II - human, PID:g758587; supported by cDNA: gi_14423517_gb_AF386996.1_AF386996                                               | 254058_at | -0.7 |
| putative protein similarity to multidrug resistance protein, <i>Mus musculus</i> , PIR1:DVMS1~Contains ABC transporters family signature, (LSGGQRQ    | 254068_at | -0.7 |
| putative protein various predicted proteins, <i>Arabidopsis thaliana</i> ; supported by full-length cDNA: Ceres: 122917.                              | 254048_at | -0.7 |
| putative protein LEDI-3 protein, <i>Lithospermum erythrorhizon</i>                                                                                    | 253909_at | -0.7 |
| putative protein hypothetical protein, <i>Synechocystis sp.</i> , PIR2:S77328; supported by cDNA: gi_14335171_gb_AY037265.1_                          | 253893_at | -0.7 |
| putative protein ;supported by full-length cDNA: Ceres:113484.                                                                                        | 253891_at | -0.7 |
| putative protein unknown protein chromosome II BAC F6F22 - <i>Arabidopsis thaliana</i> ,PID:g3687251; supported by full-length cDNA: Ceres: 5426.     | 253728_at | -0.7 |
| putative protein D-ribulokinase - <i>Klebsiella pneumoniae</i> ,Pir2:S78598                                                                           | 253612_at | -0.7 |
| putative protein component of aniline dioxygenase (GMP synthase like protein) - <i>Acinetobacter sp.</i> ,PID:d1013698;supported by full-length cDNA: | 253639_at | -0.7 |
| putative protein component of aniline dioxygenase (GMP synthase like protein - <i>Acinetobacter sp.</i> ,PID:d1013698; supported by full-length cDNA: | 253606_at | -0.7 |
| putative protein RING-H2 finger protein RHX1a - <i>Arabidopsis thaliana</i> ,PID:g3790591; supported by cDNA: gi_15809839_gb_AY054187.1_              | 253580_at | -0.7 |
| SERINE CARBOXYPEPTIDASE II - like protein serine-type carboxypeptidase, <i>Hordeum vulgare</i> , PIR2:S44191; supported by cDNA: gi_1529304           | 253600_at | -0.7 |
| Expressed protein ; supported by full-length cDNA: Ceres: 37878.                                                                                      | 253548_at | -0.7 |
| putative protein ;supported by full-length cDNA: Ceres:2508.                                                                                          | 253440_at | -0.7 |
| pectinesterase - like protein pectinesterase, <i>Prunus persica</i> , X95991; supported by cDNA: gi_14190428_gb_AF378892.1_AF378892                   | 253372_at | -0.7 |
| Expressed protein ; supported by full-length cDNA: Ceres: 38416.                                                                                      | 253305_at | -0.7 |
| putative protein auxin-regulated gene, <i>Vigna radiata</i>                                                                                           | 253253_at | -0.7 |
| NAD+ dependent isocitrate dehydrogenase subunit 1 ;supported by full-length cDNA: Ceres:12228.                                                        | 253196_at | -0.7 |
| clathrin assembly protein AP19 homolog ;supported by full-length cDNA: Ceres:22906.                                                                   | 253199_at | -0.7 |
| ferulate-5-hydroxylase (FAH1) ; supported by cDNA: gi_1488254_gb_U38416.1_ATU38416                                                                    | 253088_at | -0.7 |
| formamidase - like protein formamidase, <i>Methylophilus methylotrophus</i> ,PIR2:S74213;supported by full-length cDNA: Ceres:23732.                  | 253042_at | -0.7 |
| putative protein beta-ketoamidate enol-lactone hydrolase, <i>Acinetobacter sp.</i> , L05770; supported by cDNA: gi_15810302_gb_AY056190.1_            | 253053_at | -0.7 |
| hypothetical protein ;supported by full-length cDNA: Ceres:21.                                                                                        | 253005_at | -0.7 |
| dnaJ-like protein CAJ1 protein, <i>Saccharomyces cerevisiae</i> , PIR2:S48085                                                                         | 252935_at | -0.7 |
| myo-inositol-1-phosphate synthase ;supported by full-length cDNA: Ceres:1978.                                                                         | 252863_at | -0.7 |
| putative protein ;supported by full-length cDNA: Ceres:15747.                                                                                         | 252821_at | -0.7 |
| DnaJ - like protein DnaJ-like protein, <i>Pisum sativum</i> , Z71640; supported by cDNA: gi_15450580_gb_AY052658.1_                                   | 252828_at | -0.7 |
| nucleic acid binding protein-like nucleic acid binding protein - <i>Oryza sativa</i> , PIR:T02745                                                     | 252764_at | -0.7 |
| glutathione transferase-like protein glutathione transferase, papaya, PIR:T09781;supported by full-length cDNA: Ceres:19003.                          | 252712_at | -0.7 |
| dTDP-glucose 4-6-dehydratases-like protein dTDP-glucose 4-6-dehydratases homolog - <i>Arabidopsis thaliana</i> ,PIR:S58282;supported by full-leng     | 252527_at | -0.7 |
| putative protein ;supported by full-length cDNA: Ceres:7104.                                                                                          | 252033_at | -0.7 |
| carbonic anhydrase (CAH1) ; supported by cDNA: gi_15450772_gb_AY054466.1_                                                                             | 252011_at | -0.7 |
| putative protein crp1 protein, <i>Zea mays</i> , PIR:T01685; supported by cDNA: gi_15982930_gb_AY057573.1_                                            | 251936_at | -0.7 |
| putative protein leucine-rich receptor-like protein kinase - <i>Malus domestica</i> , EMBL:AF053127                                                   | 251714_at | -0.7 |
| serine/threonine-specific protein kinase NAK ;supported by full-length cDNA: Ceres:27477.                                                             | 250990_at | -0.7 |
| putative protein myosin heavy chain, <i>Girardia tigrina</i> , EMBL:U91585; supported by full-length cDNA: Ceres: 9220.                               | 250919_at | -0.7 |
| syntaxin-like protein syntaxin-related protein Nt-syr1 - <i>Nicotiana tabacum</i> , EMBL:AF112863;supported by full-length cDNA: Ceres:14098.         | 250544_at | -0.7 |

|                                                                                                                                                    |             |      |
|----------------------------------------------------------------------------------------------------------------------------------------------------|-------------|------|
| NADH dehydrogenase ;supported by full-length cDNA: Ceres:38092.                                                                                    | 250534_at   | -0.7 |
| Expressed protein ; supported by full-length cDNA: Ceres: 17241.                                                                                   | 250536_at   | -0.7 |
| 26S proteasome p55 protein-like ; supported by cDNA: gi_14334433_gb_AY034908.1_                                                                    | 250456_at   | -0.7 |
| aspartate kinase ;supported by full-length cDNA: Ceres:94688.                                                                                      | 250291_at   | -0.7 |
| delta subunit of mitochondrial F1-ATPase ; supported by cDNA: gi_14190494_gb_AF380647.1_AF380647                                                   | 250236_at   | -0.7 |
| S-adenosylmethionine:2-demethylmenaquinone methyltransferase-like protein ; supported by full-length cDNA: Ceres: 13819.                           | 250129_at   | -0.7 |
| BCS1 - like protein h-bcs1, Homo sapiens, EMBL:AF026849; supported by cDNA: gi_15810570_gb_AY056324.1_                                             | 250062_at   | -0.7 |
| putative protein similar to unknown protein (dbj BAA92923.1)                                                                                       | 249899_at   | -0.7 |
| eIF4Eiso protein (emb CAA71579.1) ;supported by full-length cDNA: Ceres:23770.                                                                     | 249712_at   | -0.7 |
| acetyl-CoA synthetase ; supported by cDNA: gi_15028046_gb_AY045880.1_                                                                              | 249638_at   | -0.7 |
| glutathione transferase AtGST 10 (emb CAA10457.1) ; supported by cDNA: gi_15451157_gb_AY054659.1_                                                  | 249291_at   | -0.7 |
| putative protein contains similarity to surface protein; supported by cDNA: gi_16648846_gb_AY058201.1_                                             | 249037_at   | -0.7 |
| subtilisin-like serine protease contains similarity to meiotic serine proteinase TMP GI:6468325 from [Lycopersicon esculentum]                     | 249059_at   | -0.7 |
| unknown protein ;supported by full-length cDNA: Ceres:114691.                                                                                      | 248881_at   | -0.7 |
| putative protein contains similarity to unknown protein (gb AAF63638.1); supported by cDNA: gi_15983463_gb_AF424606.1_AF424606                     | 248907_at   | -0.7 |
| casein kinase II beta chain ; supported by cDNA: gi_468263_gb_L22563.1_ATHCKIB                                                                     | 248826_at   | -0.7 |
| ethylene responsive element binding factor 5 (ATERF5) (sp O80341) ; supported by cDNA: gi_14326511_gb_AF385709.1_AF385709                          | 248799_at   | -0.7 |
| putative protein strong similarity to unknown protein (emb CAB87804.1)                                                                             | 248724_at   | -0.7 |
| putative protein strong similarity to unknown protein (gb AAD50008.1);supported by full-length cDNA: Ceres:7861.                                   | 248507_at   | -0.7 |
| nodulin-like protein ; supported by cDNA: gi_14532599_gb_AY039924.1_                                                                               | 248521_s_at | -0.7 |
| Expressed protein ; supported by full-length cDNA: Ceres: 36971.                                                                                   | 248460_at   | -0.7 |
| putative protein strong similarity to unknown protein (gb AAB68038.1);supported by full-length cDNA: Ceres:17208.                                  | 248433_at   | -0.7 |
| cytochrome P450                                                                                                                                    | 248353_at   | -0.7 |
| putative protein strong similarity to unknown protein (pir T02324); supported by cDNA: gi_15028278_gb_AY046054.1_                                  | 248335_at   | -0.7 |
| putative protein contains similarity to 40S ribosomal protein S10;supported by full-length cDNA: Ceres:91769.                                      | 248331_at   | -0.7 |
| Avr9 elicitor response protein-like ; supported by cDNA: gi_14423409_gb_AF386942.1_AF386942                                                        | 248262_at   | -0.7 |
| 2-oxoglutarate dehydrogenase E2 subunit ; supported by cDNA: gi_14596218_gb_AY042897.1_                                                            | 248088_at   | -0.7 |
| putative protein similar to unknown protein (gb AAF04428.1);supported by full-length cDNA: Ceres:27668.                                            | 248028_at   | -0.7 |
| putative protein similar to unknown protein (pir T23656); supported by cDNA: gi_16648986_gb_AY059863.1_                                            | 248042_at   | -0.7 |
| S-adenosylmethionine:2-demethylmenaquinone methyltransferase-like                                                                                  | 248007_at   | -0.7 |
| 60S ribosomal protein L31 ;supported by full-length cDNA: Ceres:14992.                                                                             | 247978_at   | -0.7 |
| nucleosome assembly protein                                                                                                                        | 247955_at   | -0.7 |
| putative protein                                                                                                                                   | 247754_at   | -0.7 |
| putative protein heat shock protein 40 DnaJ, Methanosarcina thermophila, EMBL:AJ010152                                                             | 247733_at   | -0.7 |
| putative ripening-related protein - like putative ripening-related protein Vitis vinifera EMBL:VVI237988;supported by full-length cDNA: Ceres:9907 | 247706_at   | -0.7 |
| actin depolymerizing factor 3 - like protein actin depolymerizing factor 3, Arabidopsis thaliana, EMBL:AF102821;supported by full-length cDNA: C   | 247658_at   | -0.7 |
| 40S ribosomal protein S19 - like 40S ribosomal protein S19, Oryza sativa, SWISSPROT:RS19_ORYSA                                                     | 247566_at   | -0.7 |
| DNA binding protein - like DNA binding protein EREBP-4, Nicotiana tabacum, PIR:T02434;supported by full-length cDNA: Ceres:92102.                  | 247543_at   | -0.7 |
| putative protein predicted proteins, D.melanogaster and S.pombe; supported by cDNA: gi_15294203_gb_AF410293.1_AF410293                             | 247467_at   | -0.7 |
| DC1.2 homologue - like protein DC1.2 homologue, Nicotiana tabacum, EMBL:AB009888                                                                   | 247478_at   | -0.7 |
| H-protein promoter binding factor-like protein                                                                                                     | 247452_at   | -0.7 |
| 1-deoxy-D-xylulose 5-phosphate reductoisomerase (DXR) ;supported by full-length cDNA: Ceres:117626.                                                | 247401_at   | -0.7 |
| glutamate-1-semialdehyde 2,1-aminomutase 1 precursor (GSA 1) (glutamate-1-semialdehyde aminotransferase 1) (GSA-AT 1) (sp P42799)                  | 247392_at   | -0.7 |
| Isp4-like protein ; supported by full-length cDNA: Ceres: 3109.                                                                                    | 247284_at   | -0.7 |

|                                                                                                                                                |           |      |
|------------------------------------------------------------------------------------------------------------------------------------------------|-----------|------|
| cellulose synthase catalytic subunit                                                                                                           | 247251_at | -0.7 |
| putative protein similar to unknown protein (emb CAB61744.1); supported by full-length cDNA: Ceres: 31648.                                     | 247214_at | -0.7 |
| asparagine synthetase (gb AAC72837.1) ; supported by cDNA: gi_3859535_gb_AF095453.1_AF095453                                                   | 247218_at | -0.7 |
| auxin-induced protein IAA9 (pir  T05902) ;supported by full-length cDNA: Ceres:31563.                                                          | 247148_at | -0.7 |
| succinate dehydrogenase flavoprotein alpha subunit (emb CAA05025.1) ; supported by cDNA: gi_15010745_gb_AY045674.1_                            | 247060_at | -0.7 |
| putative protein apoptosis-related protein PNAS-4, Homo sapiens, EMBL:AF229834;supported by full-length cDNA: Ceres:263500.                    | 246931_at | -0.7 |
| glutamyl-tRNA synthetase ; supported by cDNA: gi_3435195_gb_AF067773.1_AF067773                                                                | 246845_at | -0.7 |
| glycine rich protein - like glycine rich protein, Nicotiana tabacum, PIR:S54169;supported by full-length cDNA: Ceres:39561.                    | 246741_at | -0.7 |
| putative protein p76, Homo sapiens, EMBL:HSU81006                                                                                              | 246650_at | -0.7 |
| transmembrane protein FT27/PFT27-like ;supported by full-length cDNA: Ceres:12993.                                                             | 246619_at | -0.7 |
| putative protein strong similarity to unknown protein (gb AAD26879.1); supported by cDNA: gi_16323076_gb_AY057642.1_                           | 246621_at | -0.7 |
| nuM1 protein, putative similar to nuM1 protein GI:1279562 from [Medicago sativa]                                                               | 246623_at | -0.7 |
| formate dehydrogenase (FDH) ;supported by full-length cDNA: Ceres:7530.                                                                        | 246595_at | -0.7 |
| putative protein predicted proteins, Arabidopsis thaliana;supported by full-length cDNA: Ceres:25053.                                          | 246549_at | -0.7 |
| receptor protein kinase-like protein probable somatic embryogenesis receptor-like kinase - Daucus carota, EMBL:U93048;supported by full-length | 246483_at | -0.7 |
| 40S ribosomal protein S7-like 40S ribosomal protein S7 homolog - Brassica oleracea, EMBL:AF144752;supported by full-length cDNA: Ceres:23      | 246503_at | -0.7 |
| putative protein predicted protein, Drosophila melanogaster                                                                                    | 246462_at | -0.7 |
| unknown protein                                                                                                                                | 246320_at | -0.7 |
| geranylgeranyl pyrophosphate synthase ;supported by full-length cDNA: Ceres:36701.                                                             | 246198_at | -0.7 |
| putative protein ;supported by full-length cDNA: Ceres:16131.                                                                                  | 246200_at | -0.7 |
| methionyl aminopeptidase-like protein ;supported by full-length cDNA: Ceres:18909.                                                             | 246202_at | -0.7 |
| ankyrin-repeat protein patsas protein - Drosophila melanogaster, EMBL:AF163011                                                                 | 246119_at | -0.7 |
| zinc finger protein ;supported by full-length cDNA: Ceres:152664.                                                                              | 246069_at | -0.7 |
| glutaredoxin ;supported by full-length cDNA: Ceres:115597.                                                                                     | 246092_at | -0.7 |
| NAM-like protein hypothetical protein SENU5, senescence up-regulated - Lycopersicon esculentum, EMBL:Z75524; supported by cDNA: gi_1432        | 245987_at | -0.7 |
| aspartate aminotransferase Asp2 ; supported by cDNA: gi_693689_gb_U15033.1_ATU15033                                                            | 245951_at | -0.7 |
| amino acid transport protein AAP2 ;supported by full-length cDNA: Ceres:114602.                                                                | 245891_at | -0.7 |
| unknown protein                                                                                                                                | 245877_at | -0.7 |
| anthocyanin2, putative similar to anthocyanin2 (An2) GI:7673088 from [Petunia integrifolia]; supported by cDNA: gi_3941507_gb_AF062908.1_A     | 245628_at | -0.7 |
| unknown protein contains similarity to 60S acidic ribosomal protein GI:5815233 from [Homo sapiens];supported by full-length cDNA: Ceres:6288.  | 245639_at | -0.7 |
| hypothetical protein                                                                                                                           | 245601_at | -0.7 |
| hypothetical protein                                                                                                                           | 245474_at | -0.7 |
| Expressed protein ; supported by full-length cDNA: Ceres: 37809.                                                                               | 245329_at | -0.7 |
| isomerase like protein ;supported by full-length cDNA: Ceres:40913.                                                                            | 245332_at | -0.7 |
| Expressed protein ; supported by full-length cDNA: Ceres: 7101.                                                                                | 245337_at | -0.7 |
| cytosolic O-acetylserine(thiol)lyase (EC 4.2.99.8) ; supported by cDNA: gi_15027936_gb_AY045825.1_                                             | 245286_at | -0.7 |
| hypothetical protein ; supported by cDNA: gi_15292862_gb_AY050865.1_                                                                           | 245290_at | -0.7 |
| putative thioredoxin reductase The last 2 exons encode thioredoxin. There is an EST match to exons 5-7, and the distance between exon 7 and e  | 245118_at | -0.7 |
| ATPase III subunit                                                                                                                             | 245026_at | -0.7 |
| NADH dehydrogenase subunit                                                                                                                     | 245010_at | -0.7 |
| hypothetical protein                                                                                                                           | 245018_at | -0.7 |
| ribosomal protein L20                                                                                                                          | 244970_at | -0.7 |
| ribosomal protein L16                                                                                                                          | 244983_at | -0.7 |
| hypothetical protein predicted by genscan and genefinder                                                                                       | 257382_at | -0.7 |



|                                                                                                                                              |               |      |
|----------------------------------------------------------------------------------------------------------------------------------------------|---------------|------|
| unknown protein                                                                                                                              | 267132_at     | -0.7 |
| DnaJ protein, putative contains Pfam profile: PF00226 DnaJ domain                                                                            | 256320_at     | -0.7 |
| putative protein TH65 protein, Arabidopsis thaliana, EMBL:AJ001729                                                                           | 250429_at     | -0.7 |
| putative protein strong similarity to unknown protein (emb CAB87904.1); supported by cDNA: gi_15028350_gb_AY045978.1_                        | 249290_at     | -0.7 |
| putative pyrophosphate--fructose-6-phosphate 1-phosphotransferase                                                                            | 264044_at     | -0.7 |
| single-strand nucleic acid-binding protein, putative similar to FUSE binding protein 2 GB:AAC50892 GI:1575607 from [Homo sapiens]            | 261988_at     | -0.7 |
| Arabidopsis thaliana /REF=X52320 /DEF=25S rRNA /LEN=4310                                                                                     | Athal-25SrRN, | -0.6 |
| unknown protein predicted by genefinder                                                                                                      | 267630_at     | -0.6 |
| unknown protein ; supported by cDNA: gi_13877620_gb_AF370511.1_AF370511                                                                      | 267577_at     | -0.6 |
| putative cytochrome b5                                                                                                                       | 267544_at     | -0.6 |
| cinnamate-4-hydroxylase molecular marker C4H (GB:U71080); supported by cDNA: gi_1773288_gb_U71081.1_ATU71081                                 | 267470_at     | -0.6 |
| putative ferrochelatase precursor ; supported by cDNA: gi_16226930_gb_AF428371.1_AF428371                                                    | 267471_at     | -0.6 |
| unknown protein                                                                                                                              | 267383_at     | -0.6 |
| coronatine-insensitive 1 (COI1), AtFBL2 identical to LRR-containing F-box protein GI:3158394 from [Arabidopsis thaliana]                     | 267346_at     | -0.6 |
| putative protein transport protein SEC13 ;supported by full-length cDNA: Ceres:36577.                                                        | 267277_at     | -0.6 |
| putative transport protein ;supported by full-length cDNA: Ceres:26825.                                                                      | 267219_at     | -0.6 |
| unknown protein ;supported by full-length cDNA: Ceres:10293.                                                                                 | 267237_s_at   | -0.6 |
| 60S ribosomal protein L7 ;supported by full-length cDNA: Ceres:36813.                                                                        | 267213_at     | -0.6 |
| calmodulin (cam2)                                                                                                                            | 267064_at     | -0.6 |
| unknown protein                                                                                                                              | 267055_at     | -0.6 |
| Expressed protein ; supported by full-length cDNA: Ceres: 16411.                                                                             | 267000_at     | -0.6 |
| putative phospholipase                                                                                                                       | 266977_at     | -0.6 |
| putative protein kinase contains a protein kinase domain profile (PDOC00100)                                                                 | 266946_at     | -0.6 |
| ribonuclease, RNS1 identical to ribonuclease SP:P42813, GI:561998 from [Arabidopsis thaliana]; supported by full-length cDNA: Ceres:27242.   | 266743_at     | -0.6 |
| hypothetical protein predicted by genscan; supported by cDNA: gi_15810382_gb_AY056230.1_                                                     | 266662_at     | -0.6 |
| unknown protein                                                                                                                              | 266599_at     | -0.6 |
| hypothetical protein predicted by genscan and genefinder;supported by full-length cDNA: Ceres:13580.                                         | 266576_at     | -0.6 |
| putative transportin                                                                                                                         | 266523_at     | -0.6 |
| unknown protein ; supported by cDNA: gi_16649150_gb_AY059945.1_                                                                              | 266481_at     | -0.6 |
| putative glyoxysomal malate dehydrogenase precursor ; supported by cDNA: gi_16226836_gb_AF428346.1_AF428346                                  | 266457_at     | -0.6 |
| putative phospholipid cytidylyltransferase                                                                                                   | 266399_at     | -0.6 |
| 20S proteasome subunit C8 (PAG1/PRC8_ARATH) identical to GB:Y13693;supported by full-length cDNA: Ceres:8342.                                | 266312_at     | -0.6 |
| putative proliferating cell nuclear antigen, PCNA ;supported by full-length cDNA: Ceres:342.                                                 | 266297_at     | -0.6 |
| putative cinnamoyl-CoA reductase                                                                                                             | 266202_at     | -0.6 |
| putative CCAAT-binding transcription factor subunit identical to GB:Y13723; contains a CBF/NF-Y subunit signature (PDOC00578) presernt in me | 266171_at     | -0.6 |
| subtilisin-like serine protease, putative contains similarity to cucumisn-like serine protease GI:3176874 from [Arabidopsis thaliana]        | 266022_at     | -0.6 |
| putative leucine aminopeptidase identical to GB:X63444; supported by cDNA: gi_14334665_gb_AY035006.1_                                        | 265996_at     | -0.6 |
| putative Ta11-like non-LTR retroelement protein similar to GB:AAA75253; some members of this protein family have a weak CCHC zinc fingers tf | 265939_at     | -0.6 |
| putative sugar transporter ;supported by full-length cDNA: Ceres:114959.                                                                     | 265768_at     | -0.6 |
| hypothetical protein predicted by genefinder                                                                                                 | 265777_at     | -0.6 |
| putative integral membrane protein                                                                                                           | 265713_at     | -0.6 |
| similar to avrRpt2-induced protein 2                                                                                                         | 265682_at     | -0.6 |
| cysteine proteinase contains similarity to cysteine protease SPCP1 GI:13491750 from [Ipomoea batatas]                                        | 265665_at     | -0.6 |
| putative glutaredoxin ;supported by full-length cDNA: Ceres:30611.                                                                           | 265288_at     | -0.6 |

|                                                                                                                                                  |             |      |
|--------------------------------------------------------------------------------------------------------------------------------------------------|-------------|------|
| putative ribose phosphate pyrophosphokinase ;supported by full-length cDNA: Ceres:35051.                                                         | 265270_at   | -0.6 |
| hypothetical protein similar to putative glucosyltransferase GB:AAD15455 GI:4263795 from (Arabidopsis thaliana)                                  | 265175_at   | -0.6 |
| unknown protein similar to putative tyrosine phosphatase GB:AAF81798 GI:8926334 from [Oryza sativa];supported by full-length cDNA: Ceres:83      | 265073_at   | -0.6 |
| hypothetical protein contains similarity to high-glucose-regulated protein 8 GB:AAF08813 GI:6449083 from [Homo sapiens]; supported by cDNA: ;    | 265078_at   | -0.6 |
| unknown protein location of ESTs est VBVB05, gb Z30807 and VBVB05 , gb Z30808;supported by full-length cDNA: Ceres:39763.                        | 265066_at   | -0.6 |
| hypothetical protein predicted by genefinder;supported by full-length cDNA: Ceres:271253.                                                        | 265067_at   | -0.6 |
| mitochondrial processing peptidase alpha subunit, putative similar to mitochondrial processing peptidase alpha subunit GI:9279647 from [Arabid   | 265056_at   | -0.6 |
| NBS/LRR disease resistance protein, putative similar to NBS/LRR disease resistance protein GI:3309619 from [Arabidopsis thaliana]; supported     | 264885_s_at | -0.6 |
| putative metalloproteinase similar to GB:AAB61099                                                                                                | 264866_at   | -0.6 |
| putative violaxanthin de-epoxidase precursor (U44133) similar to EST gb N37612; supported by cDNA: gi_1465734_gb_U44133.1_ATU44133               | 264799_at   | -0.6 |
| putative GPI-anchor transamidase (U32517) similar to GB:P49018;supported by full-length cDNA: Ceres:120167.                                      | 264810_at   | -0.6 |
| phosphomethylpyrimidine kinase probable thiamin biosynthetic enzyme, location of EST gb AA395737, gb T21651                                      | 264771_at   | -0.6 |
| unknown protein                                                                                                                                  | 264696_at   | -0.6 |
| unknown protein ; supported by full-length cDNA: Ceres: 4324.                                                                                    | 264671_at   | -0.6 |
| hypothetical protein Contains similarity to Rattus AMP-activated protein kinase (gb X95577); supported by cDNA: gi_9965728_gb_AF250335.1_A       | 264625_at   | -0.6 |
| hypothetical protein similar to ankyrin like protein GI:7268141 from [Arabidopsis thaliana]; supported by cDNA: gi_14194106_gb_AF367259.1_AF     | 264484_at   | -0.6 |
| putative protein import receptor similar to TOM20 (GB:CAA63223) from [Solanum tuberosum]; similar to ESTs gb T444475, emb Z26777, and en         | 264490_at   | -0.6 |
| hypothetical protein contains similarity to phosphate/phosphoenolpyruvate translocator precursor GI:1778141 from [Arabidopsis thaliana]          | 264419_s_at | -0.6 |
| unknown protein EST gb N96383 comes from this gene;supported by full-length cDNA: Ceres:40461.                                                   | 264366_at   | -0.6 |
| putative importin alpha similar to GB:AAC27644 and GB:CAA74966                                                                                   | 264256_at   | -0.6 |
| ribosomal protein, putative similar to ribosomal protein GI:19101 from [Hordeum vulgare]; supported by cDNA: gi_14596148_gb_AY042862.1_          | 264233_at   | -0.6 |
| putative cyclin-dependent kinase regulatory subunit                                                                                              | 264061_at   | -0.6 |
| Expressed protein ; supported by full-length cDNA: Ceres: 38277.                                                                                 | 264004_at   | -0.6 |
| unknown protein ;supported by full-length cDNA: Ceres:33232.                                                                                     | 263880_at   | -0.6 |
| putative pre-mRNA splicing factor PRP19 similar to GB:AAB80652; supported by cDNA: gi_14532631_gb_AY039940.1_                                    | 263666_at   | -0.6 |
| unknown protein ; supported by cDNA: gi_6691164_gb_AF218765.1_AF218765                                                                           | 263498_at   | -0.6 |
| arginine decarboxylase identical to GP:1590814:U52851; supported by cDNA: gi_1590813_gb_U52851.1_ATU52851                                        | 263241_at   | -0.6 |
| unknown protein ;supported by full-length cDNA: Ceres:39571.                                                                                     | 263180_at   | -0.6 |
| spore germination protein c2 similar to 2-hexaprenyl-1,4-naphthoquinone methyltransferase GB:BAA25267 GI:2982680 from [Micrococcus luteus        | 263044_at   | -0.6 |
| NADPH-dependent codeinone reductase, putative similar to NADPH-dependent codeinone reductase GI:6478210 from [Papaver somniferum]; si            | 262913_at   | -0.6 |
| unknown protein                                                                                                                                  | 262868_at   | -0.6 |
| putative beta-1,4-N-acetylglucosaminyltransferase contains similarity to gi 4417304 F15O11.7 putative beta-1,4-mannosyl-glycoprotein beta-1,4-   | 262768_at   | -0.6 |
| aspartate aminotransferase nearly identical to aspartate aminotransferase, cytoplasmic isozyme 2 SP:P46646 [Arabidopsis thaliana (Mouse-ear      | 262646_at   | -0.6 |
| putative ribokinase Except for first 69 amino acids, 33% identical to ribokinase (EC 2.7.1.15) [Bacillus subtilis] (gi 397495)                   | 262519_at   | -0.6 |
| hypothetical protein contains similarity to developmental protein DG1118 GI:3789911 from [Dictyostelium discoideum];supported by full-length cD  | 262367_at   | -0.6 |
| unknown protein ;supported by full-length cDNA: Ceres:21798.                                                                                     | 262283_at   | -0.6 |
| isochorismate synthase (icsI) identical to isochorismate synthase (icsI) GB:AF078080 (catalyzes chorismic acid to isochorismic acid Plant Physio | 262177_at   | -0.6 |
| unknown protein contains similarity to WD-40 repeat protein GI:4519417 from [Homo sapiens]                                                       | 262145_at   | -0.6 |
| hypothetical protein predicted by genemark.hmm                                                                                                   | 262104_at   | -0.6 |
| GTP-binding protein, putative similar to GTP-binding protein GB:AAF31009 GI:6899606 from [Ureaplasma urealyticum]                                | 262086_at   | -0.6 |
| ADP-ribosylation factor, putative similar to ADP-ribosylation factor GI:166586 from [Arabidopsis thaliana]                                       | 261831_at   | -0.6 |
| ATP citrate-lyase, putative similar to ATP citrate-lyase GI:9229902 from [Ciona intestinalis];supported by full-length cDNA: Ceres:36439.        | 261833_at   | -0.6 |
| 60S ribosomal protein L10A, putative similar to 60S ribosomal protein L10A GB:AAC73045 GI:3860277 from [Arabidopsis thaliana]; supported by      | 261694_at   | -0.6 |
| unknown protein similar to unknown protein GB:AAF24950 GI:6693024 from [Arabidopsis thaliana]; supported by cDNA: gi_13605566_gb_AF361           | 261651_at   | -0.6 |

|                                                                                                                                                   |             |      |
|---------------------------------------------------------------------------------------------------------------------------------------------------|-------------|------|
| fatty acid elongase 3-ketoacyl-CoA synthase 1 identical to GB:AAC99312 GI:4091810 from [Arabidopsis thaliana]                                     | 261570_at   | -0.6 |
| carbonyl reductase, putative similar to carbonyl reductase (NADPH) GB:CAA59088 GI:666087 from [Rattus norvegicus]; supported by cDNA: gi_         | 261537_at   | -0.6 |
| hypothetical protein predicted by genemark.hmm;supported by full-length cDNA: Ceres:36233.                                                        | 261483_at   | -0.6 |
| receptor kinase, putative similar to receptor kinase GI:4105699 from [Arabidopsis thaliana]                                                       | 261498_at   | -0.6 |
| glutaredoxin, putative similar to glutaredoxin GI:2244924 from [Arabidopsis thaliana]; supported by cDNA: gi_13358219_gb_AF325030.2_AF325         | 261443_at   | -0.6 |
| O-methyltransferase, putative similar to GB:AAF28353 from [Fragaria x ananassa];supported by full-length cDNA: Ceres:101583.                      | 261453_at   | -0.6 |
| CMP-KDO synthetase, putative similar to GB:CAB89846 from [Zea mays]                                                                               | 261373_at   | -0.6 |
| unknown protein                                                                                                                                   | 261328_at   | -0.6 |
| unknown protein ; supported by full-length cDNA: Ceres: 117183.                                                                                   | 261269_at   | -0.6 |
| Expressed protein ; supported by full-length cDNA: Ceres: 41453.                                                                                  | 260984_at   | -0.6 |
| 26S proteasome regulatory particle triple-A ATPase subunit4, putative similar to 26S proteasome regulatory particle triple-A ATPase subunit4 GI:  | 260940_at   | -0.6 |
| hypothetical protein predicted by genemark.hmm;supported by full-length cDNA: Ceres:29740.                                                        | 260867_at   | -0.6 |
| acyl-CoA oxidase ACX3 identical to acyl-CoA oxidase ACX3 GI:8163758 from [Arabidopsis thaliana]                                                   | 260789_s_at | -0.6 |
| RING-H2 finger protein RHA3a, putative similar to RING-H2 finger protein RHA3a GI:3790573 from [Arabidopsis thaliana]; supported by cDNA: g       | 260770_at   | -0.6 |
| mitochondrial NAD-dependent malate dehydrogenase identical to mitochondrial NAD-dependent malate dehydrogenase GI:3929649 from [Arabid            | 260615_at   | -0.6 |
| putative molybdopterin synthase large subunit ; supported by cDNA: gi_13605721_gb_AF361842.1_AF361842                                             | 260572_at   | -0.6 |
| mannosyl-oligosaccharide alpha-1,2-mannosidase, putative similar to mannosyl-oligosaccharide alpha-1,2-mannosidase (Mus musculus) GI:474:         | 260520_at   | -0.6 |
| putative alpha-amylase similar to alpha-amylase GB:AAA91884 [Solanum tuberosum]; supported by cDNA: gi_15215737_gb_AY050398.1_                    | 260412_at   | -0.6 |
| putative disease resistance protein similar to disease resistance protein RPP1-WsC GB:AAC72979 [Arabidopsis thaliana]                             | 260312_at   | -0.6 |
| putative AP2 domain transcription factor contains Pfam profile: PF00847 AP2 domain; supported by cDNA: gi_16604674_gb_AY059782.1_                 | 260209_at   | -0.6 |
| putative alpha galactosyltransferase similar to alpha galactosyltransferase GB:CAB52246 [Trigonella foenum-graecum] (plant cell wall matrix poly  | 260222_at   | -0.6 |
| calmodulin-related protein similar to GB:P25070 from [Arabidopsis thaliana], contains Pfam profile: PF00036 EF hand (4 copies);supported by full  | 260135_at   | -0.6 |
| hypothetical protein predicted by genscan+;supported by full-length cDNA: Ceres:30065.                                                            | 260056_at   | -0.6 |
| putative calmodulin similar to calmodulin GB:P02596 [Renilla reniformis]; contains Pfam profile: PF00036 EF hand (4 copies);supported by full-ler | 260076_at   | -0.6 |
| phosphatidylinositol synthase (PIS1) identical to phosphatidylinositol synthase (PIS1) GB:AJ000539;supported by full-length cDNA: Ceres:34210.    | 260006_at   | -0.6 |
| thaumatin-like protein (PR-5) similar to thaumatin GB:AAD55090 [Vitis riparia]; contains Pfam profile: PF00314 Thaumatin family; supported by cl  | 259987_at   | -0.6 |
| germin-like protein similar to germin precursor GB:P26759 [Triticum aestivum]; contains Pfam profile: PF01072 Germin family;supported by full-le  | 259892_at   | -0.6 |
| putative catechol O-methyltransferase similar to catechol O-methyltransferase GB:CAA55358 [Vanilla planifolia];supported by full-length cDNA: C   | 259878_at   | -0.6 |
| auxin-induced protein, putative similar to SP:P33083 from [Glycine max];supported by full-length cDNA: Ceres:29931.                               | 259784_at   | -0.6 |
| unknown protein ;supported by full-length cDNA: Ceres:106626.                                                                                     | 259587_at   | -0.6 |
| protein kinase, putative similar to protein kinase GI:2852447 from (Arabidopsis thaliana)                                                         | 259541_at   | -0.6 |
| hypothetical protein                                                                                                                              | 259523_at   | -0.6 |
| unknown protein ;supported by full-length cDNA: Ceres:17545.                                                                                      | 259474_at   | -0.6 |
| Myb-related transcription activator, putative similar to MybSt1 GI:7705206 from [Solanum tuberosum];supported by full-length cDNA: Ceres:4138     | 259476_at   | -0.6 |
| unknown protein ;supported by full-length cDNA: Ceres:13659.                                                                                      | 259477_at   | -0.6 |
| DNA-binding protein RAV1 identical to RAV1 GI:3868857 from [Arabidopsis thaliana]; supported by cDNA: gi_3868856_dbj_AB013886.1_AB0138            | 259364_at   | -0.6 |
| unknown protein identical to GB:AAD56318 (Arabidopsis thaliana)                                                                                   | 259211_at   | -0.6 |
| unknown protein similar to putative protein GB:CAA22987 [Arabidopsis thaliana]                                                                    | 259181_at   | -0.6 |
| unknown protein                                                                                                                                   | 259160_at   | -0.6 |
| putative auxin-independent growth promoter similar to auxin-independent growth promoter GB:A44226 [Nicotiana tabacum];supported by full-leng      | 259132_at   | -0.6 |
| putative 40S ribosomal protein S3A (S phase specific) similar to 40S ribosomal protein S3A (S phase specific protein GBIS289) GB:P49396 [Bras     | 259096_at   | -0.6 |
| putative ribose 5-phosphate isomerase identical to putative ribose 5-phosphate isomerase GB:AAD57010 (Arabidopsis thaliana); similar to ribose    | 259098_at   | -0.6 |
| unknown protein similar to hypothetical protein GB:BAA29429 [Pyrococcus horikoshii];supported by full-length cDNA: Ceres:100279.                  | 259053_at   | -0.6 |
| unknown protein contains helix-loop-helix DNA binding motif                                                                                       | 259010_at   | -0.6 |

|                                                                                                                                                    |             |      |
|----------------------------------------------------------------------------------------------------------------------------------------------------|-------------|------|
| hypothetical protein predicted by genscan+                                                                                                         | 258972_at   | -0.6 |
| hypothetical protein similar to calmodulin-like protein GB:CAB42906 [Arabidopsis thaliana]; Pfam HMM hit: EF hand; supported by full-length cDN    | 258947_at   | -0.6 |
| putative folylpolyglutamate synthetase similar to folylpolyglutamate synthetase GB:AAA87568 [Homo sapiens]                                         | 258927_at   | -0.6 |
| putative pyruvate dehydrogenase kinase similar to pyruvate dehydrogenase kinase GB:AAC97601, [Arabidopsis thaliana]                                | 258902_at   | -0.6 |
| putative dehydroquinase shikimate dehydrogenase similar to dehydroquinase shikimate dehydrogenase GB:S46210 [Nicotiana tabacum]                    | 258908_at   | -0.6 |
| hypothetical protein identical to hypothetical protein GB:AAF23211 GI:6671951 from (Arabidopsis thaliana)                                          | 258755_at   | -0.6 |
| shaggy related protein kinase, ASK-GAMMA identical to GB:P43289;supported by full-length cDNA: Ceres:17739.                                        | 258743_s_at | -0.6 |
| unknown protein                                                                                                                                    | 258662_at   | -0.6 |
| putative long-chain-fatty-acid--CoA ligase similar to putative long-chain-fatty-acid--CoA ligase (brain isozyme) GB:P33124 [Rattus norvegicus]; su | 258563_at   | -0.6 |
| unknown protein contains Pfam profile:PF00295 Polygalacturonase;supported by full-length cDNA: Ceres:38575.                                        | 258528_at   | -0.6 |
| unknown protein ;supported by full-length cDNA: Ceres:4861.                                                                                        | 258480_at   | -0.6 |
| unknown protein ; supported by cDNA: gi_14334415_gb_AY034899.1_                                                                                    | 258401_at   | -0.6 |
| putative selenocysteine methyltransferase similar to selenocysteine methyltransferase GB:P56707 from [Astragalus bisulcatus];supported by full-l   | 258322_at   | -0.6 |
| putative phospholipase D similar to phospholipase D1 GB:AAC78487 [Brassica oleracea], GB:Q38882 [Arabidopsis thaliana]; supported by cDN/          | 258226_at   | -0.6 |
| UDP-glucose:indole-3-acetate beta-D-glucosyltransferase, putative similar to UDP-glucose:indole-3-acetate beta-D-glucosyltransferase GB:AAB!       | 258167_at   | -0.6 |
| Expressed protein ; supported by cDNA: gi_15912240_gb_AY056398.1_                                                                                  | 258140_at   | -0.6 |
| putative WD-repeat protein (WDR1-like) similar to WDR1 protein GB:AAD05042 [Gallus gallus] (Genomics 56 (1), 59-69 (1999))                         | 258146_at   | -0.6 |
| putative 60S ribosomal protein L18A similar to GB:CAA08791 from [Podocoryne carnea];supported by full-length cDNA: Ceres:5961.                     | 258090_at   | -0.6 |
| protein phosphatase 2A regulatory subunit isoform B delta identical to GB:AAD02810 from [Arabidopsis thaliana]; supported by cDNA: gi_410633       | 258060_at   | -0.6 |
| expansin At-EXP5 identical to expansin At-EXP5 GB:AAB38071 from [Arabidopsis thaliana]; supported by cDNA: gi_1041703_gb_U30478.1_ATI              | 258003_at   | -0.6 |
| unknown protein                                                                                                                                    | 258015_at   | -0.6 |
| hypothetical protein predicted by genemark;supported by full-length cDNA: Ceres:108568.                                                            | 257967_at   | -0.6 |
| predicted protein supported by full-length cDNA: Ceres:250935.                                                                                     | 257953_at   | -0.6 |
| AMP-binding protein, putative contains Pfam profile: PF00501 AMP-binding enzyme; similar to acyl-CoA synthetase GB:CAB54055 [Pseudomon             | 257880_at   | -0.6 |
| GTP binding protein, putative similar to RAS-RELATED PROTEIN RAB7 GB:P31022 from [Pisum sativum], Plant Mol. Biol. 21 (6), 1195-1199 (1            | 257754_at   | -0.6 |
| root hair defective 3 (RHD3) identical to GB:AAB58375 from [Arabidopsis thaliana] (Genes Dev (1997) 11(6), 799-811)                                | 257606_at   | -0.6 |
| mitochondrial NAD-dependent malate dehydrogenase, putative similar to mitochondrial NAD-dependent malate dehydrogenase GB:CAA10320 [/              | 257213_at   | -0.6 |
| t-complex polypeptide 1 homologue identical to t-complex polypeptide 1 homologue GB:D11351 [Arabidopsis thaliana]; supported by cDNA: gi_2         | 257125_at   | -0.6 |
| ER lumen retaining receptor (HDEL receptor), putative similar to GB:P35402 from [Arabidopsis thaliana];supported by full-length cDNA: Ceres:23     | 257104_at   | -0.6 |
| zinc finger protein, putative contains Pfam profiles: PF00097 Zinc finger, C3HC4 type (RING finger) (2 copies)                                     | 257062_at   | -0.6 |
| hypothetical protein predicted by genscan+                                                                                                         | 257044_at   | -0.6 |
| NAD dependent epimerase, putative contains Pfam profile: PF01370 NAD dependent epimerase/dehydratase family; supported by cDNA: gi_138             | 256865_at   | -0.6 |
| ADP-ribosylation factor, putative similar to ADP-ribosylation factor GB:P91924 [Dugesia japonica]; supported by full-length cDNA: Ceres: 24097.    | 256838_at   | -0.6 |
| serine/threonine protein phosphatase, putative similar to serine/threonine protein phosphatase GB:Z47076 GI:1143510 [Malus domestica]; supp        | 256629_at   | -0.6 |
| glutamine synthetase, putative similar to glutamine synthetase [Raphanus sativus] GI:1526564;supported by full-length cDNA: Ceres:2662.            | 256524_at   | -0.6 |
| ferredoxin, putative similar to GB:D90912 from [Synechocystis sp. PCC6803]                                                                         | 256468_at   | -0.6 |
| omega-3 fatty acid desaturase, chloroplast precursor identical to omega-3 fatty acid desaturase, chloroplast precursor SP:P46310 (Arabidopsis tl   | 256417_s_at | -0.6 |
| 60S ribosomal protein L10, putative contains Pfam profile: PF00826: Ribosomal L10;supported by full-length cDNA: Ceres:35307.                      | 256385_at   | -0.6 |
| 5,10-methylenetetrahydrofolate dehydrogenase:5,10-methenyltetrahydrofolate cyclohydrolase, putative similar to 5,10-methylenetetrahydrofolate      | 256263_at   | -0.6 |
| hypothetical protein contains similarity to photosystem II 22 kDa protein GI:6006279 from [Arabidopsis thaliana];supported by full-length cDNA: Cx | 255982_at   | -0.6 |
| unknown protein identical to unknown protein GI:9755444 from (Arabidopsis thaliana); supported by full-length cDNA: Ceres: 110066.                 | 255856_at   | -0.6 |
| putative uroporphyrinogen decarboxylase ; supported by cDNA: gi_14334767_gb_AY035057.1_                                                            | 255826_at   | -0.6 |
| unknown protein ;supported by full-length cDNA: Ceres:19302.                                                                                       | 255816_at   | -0.6 |
| transmembrane protein, putative similar to transmembrane protein GI:535681 from [Mus musculus];supported by full-length cDNA: Ceres:40780.         | 255735_at   | -0.6 |

|                                                                                                                                                   |             |      |
|---------------------------------------------------------------------------------------------------------------------------------------------------|-------------|------|
| DNA-binding protein RAV2, putative similar to DNA-binding protein RAV2 GI:3868859 from [Arabidopsis thaliana]; supported by cDNA: gi_15810        | 255742_at   | -0.6 |
| probable cytochrome P450                                                                                                                          | 255690_at   | -0.6 |
| putative carrier protein similar to mitochondrial carrier family; supported by cDNA: gi_13430511_gb_AF360168.1_AF360168                           | 255570_at   | -0.6 |
| hypothetical protein similar to A. thaliana hypothetical protein T13L16.2, GenBank accession number 2708738                                       | 255462_at   | -0.6 |
| putative calcium channel ; supported by cDNA: gi_13786068_gb_AF360372.1_AF360372                                                                  | 255380_at   | -0.6 |
| putative phosphofructokinase beta subunit                                                                                                         | 255365_at   | -0.6 |
| MAP kinase (ATMPK5) possible internal deletion at position 161, missing one A residue; reference GI:457401; supported by cDNA: gi_457401_d        | 254924_at   | -0.6 |
| putative pollen-specific protein pollen-specific protein precursor - common tobacco, PIR2:S22495                                                  | 254815_at   | -0.6 |
| putative protein putative oxidoreductase - Streptomyces lividans,PID:g3293547;supported by full-length cDNA: Ceres:6276.                          | 254804_at   | -0.6 |
| putative protein ; supported by cDNA: gi_14596204_gb_AY042890.1_                                                                                  | 254705_at   | -0.6 |
| Expressed protein ; supported by cDNA: gi_13430529_gb_AF360177.1_AF360177                                                                         | 254709_at   | -0.6 |
| neoxanthin cleavage enzyme-like protein neoxanthin cleavage enzyme, Lycopersicon esculentum, PATX:E325797; supported by cDNA: gi_1598             | 254564_at   | -0.6 |
| cytochrome P450 - like protein flavonoid 3 ,5 -hydroxylase Hf1, Petunia x hybrida, PIR2:S38985                                                    | 254331_s_at | -0.6 |
| beta adaptin - like protein beta-adaptin 1, Drosophila melanogaster, PIR2:S39295                                                                  | 254261_at   | -0.6 |
| putative protein Pennisetum ciliare possible apospory-associated mRNA clone pSUB C, PID:g549984;supported by full-length cDNA: Ceres:2194         | 254223_at   | -0.6 |
| hypothetical protein                                                                                                                              | 254154_at   | -0.6 |
| CER2 ;supported by full-length cDNA: Ceres:33382.                                                                                                 | 254122_at   | -0.6 |
| argininosuccinate synthase -like protein argininosuccinate synthase, Aquifex aeolicus, PIR2:B70398                                                | 254134_at   | -0.6 |
| putative protein pectinesterase - Citrus sinensis, PID:g2098705                                                                                   | 254110_at   | -0.6 |
| putative uracil phosphoribosyl transferase uracil phosphoribosyl transferase,Saccharomyces cerevisiae, PIR2:JH0147supported by full-length cD     | 253970_at   | -0.6 |
| putative protein ;supported by full-length cDNA: Ceres:112916.                                                                                    | 253688_at   | -0.6 |
| Ca2+-transporting ATPase - like protein calmodulin-stimulated calcium-ATPase, Brassica oleracea, gb:X99972                                        | 253702_at   | -0.6 |
| putative protein hypothetical protein - Arabidopsis thaliana,PID:g3738329;supported by full-length cDNA: Ceres:17578.                             | 253635_at   | -0.6 |
| protein kinase - like protein protein kinase 6, Glycine max., PIR2:S29851;supported by full-length cDNA: Ceres:156374.                            | 253564_at   | -0.6 |
| predicted protein hypothetical protein slr1919, Synechocystis sp., PIR2:S75233                                                                    | 253517_at   | -0.6 |
| putative protein myosin heavy chain, neuronal, Rattus norvegicus, Pir1:S21801; supported by cDNA: gi_14334773_gb_AY035060.1_                      | 253523_at   | -0.6 |
| ribosomal protein S6 - like ribosomal protein S6, Arabidopsis thaliana, PID:g2662469; supported by cDNA: gi_15292738_gb_AY050803.1_               | 253487_at   | -0.6 |
| putative protein phosphate/phosphoenolpyruvate translocator, Arabidopsis thaliana, ATU66321                                                       | 253427_at   | -0.6 |
| putative protein mRNAs from Ricinus communis and Medicago sativa, Z81012 and L36159;supported by full-length cDNA: Ceres:37529.                   | 253437_at   | -0.6 |
| Expressed protein ; supported by full-length cDNA: Ceres: 109432.                                                                                 | 253302_at   | -0.6 |
| putative protein hypothetical protein, Synechocystis sp., PIR2:S76307; supported by cDNA: gi_14596178_gb_AY042877.1_                              | 253235_at   | -0.6 |
| putative protein ; supported by cDNA: gi_14517511_gb_AY039591.1_                                                                                  | 253049_at   | -0.6 |
| putative protein probable arabinogalactan protein precursor, Lycopersicon esculentum, PIR2:S55925; supported by cDNA: gi_11935087_gb_AF360168     | 253050_at   | -0.6 |
| geranylgeranyl pyrophosphate synthase-related protein ;supported by full-length cDNA: Ceres:28204.; supported by cDNA: gi_13265402_gb_AF360168    | 252996_s_at | -0.6 |
| putative protein DNA damage-inducible protein - Synechocystis sp.,PIR2:S77364                                                                     | 252921_at   | -0.6 |
| putative proton pump vacuolar proton ATPase 100-kDa subunit - Dictyostelium discoideum, PID:g1384136; supported by cDNA: gi_16974582_gb_AY0400    | 252932_at   | -0.6 |
| putative gamma-glutamyltransferase gamma-glutamyltransferase, Arabidopsis thaliana, PIR2:S58286                                                   | 252906_at   | -0.6 |
| GTP-binding protein GB3 ;supported by full-length cDNA: Ceres:8545.                                                                               | 252875_at   | -0.6 |
| putative protein hypothetical protein slr1699 - Synechocystis sp. (strain PCC 6803), PIR:S75306; supported by cDNA: gi_14532795_gb_AY0400.        | 252724_at   | -0.6 |
| putative protein pectinesterase homolog - Pinus radiata,PIR2:T08112                                                                               | 252437_at   | -0.6 |
| 40S ribosomal protein S20-like protein 40S RIBOSOMAL PROTEIN S20 - ARABIDOPSIS THALIANA,PID:g1350956;supported by full-length cDI                 | 252413_at   | -0.6 |
| putative protein several hypothetical proteins                                                                                                    | 252329_at   | -0.6 |
| peroxidase ;supported by full-length cDNA: Ceres:39678.                                                                                           | 252291_s_at | -0.6 |
| signal recognition particle subunit 9 - like signal recognition particle subunit 9, Zea mays, EMBL:Y10117;supported by full-length cDNA: Ceres:14 | 252295_at   | -0.6 |

|                                                                                                                                                  |             |      |
|--------------------------------------------------------------------------------------------------------------------------------------------------|-------------|------|
| cytosolic ribosomal protein S11 ;supported by full-length cDNA: Ceres:40559.                                                                     | 252297_at   | -0.6 |
| RNA-binding - like protein RNA-binding protein RBP37, Arabidopsis thaliana, PIR:T04196                                                           | 252313_at   | -0.6 |
| putative protein ;supported by full-length cDNA: Ceres:15698.                                                                                    | 252270_at   | -0.6 |
| centrin                                                                                                                                          | 252206_at   | -0.6 |
| putative protein RNA-binding protein 30 - Nicotiana plumbaginifolia,PIR2:S26203                                                                  | 252032_at   | -0.6 |
| hypothetical protein ; supported by cDNA: gi_15450654_gb_AY052695.1_                                                                             | 252010_at   | -0.6 |
| putative protein predicted proteins, Arabidopsis thaliana                                                                                        | 252014_at   | -0.6 |
| fructose biphosphate aldolase - like protein fructose biphosphate aldolase, garden pea, PIR:S58167;supported by full-length cDNA: Ceres:344      | 252022_at   | -0.6 |
| sigma factor SigC ; supported by cDNA: gi_2353174_gb_AF015544.1_AF015544                                                                         | 251929_at   | -0.6 |
| peptide transport - like protein peptide transport protein, Hordeum vulgare, PIR:T04378;supported by full-length cDNA: Ceres:117581.             | 251882_at   | -0.6 |
| beta-N-acetylhexosaminidase -like protein various beta-N-acetylhexosaminidases; supported by full-length cDNA: Ceres: 118286.                    | 251782_at   | -0.6 |
| 2-oxoglutarate dehydrogenase, E1 subunit - like protein 2-oxoglutarate dehydrogenase, E1 subunit, Arabidopsis thaliana, EMBL:ART223802           | 251787_at   | -0.6 |
| delta-1-pyrroline-5-carboxylate synthetase                                                                                                       | 251775_s_at | -0.6 |
| putative protein                                                                                                                                 | 251720_at   | -0.6 |
| responce reactor 4 ; supported by cDNA: gi_3273201_dbj_AB010918.1_AB010918                                                                       | 251665_at   | -0.6 |
| putative protein multisynthetase complex auxiliary component p43 - Cricetulus griseus, EMBL:AF021800;supported by full-length cDNA: Ceres:2      | 251442_at   | -0.6 |
| putative protein pectinesterase homolog - Pinus radiata, PIR:T08112;supported by full-length cDNA: Ceres:23716.                                  | 251181_at   | -0.6 |
| putative protein putative protein At2g15760 - Arabidopsis thaliana, EMBL:AC006438;supported by full-length cDNA: Ceres:2947.                     | 251183_at   | -0.6 |
| ATMRK1 ;supported by full-length cDNA: Ceres:253505.                                                                                             | 251170_at   | -0.6 |
| putative protein                                                                                                                                 | 250948_at   | -0.6 |
| ABC transporter -like protein ABC-type transport protein sll1276, Synechocystis sp., PIR:S77239; supported by cDNA: gi_16604564_gb_AY0597        | 250885_at   | -0.6 |
| fatty acid elongase - like protein KCS1 fatty acid elongase 3-ketoacyl-CoA synthase 1, Arabidopsis thaliana, EMBL:AF053345                       | 250891_at   | -0.6 |
| putative RNA-binding protein astrocytic NOVA-like RNA-binding protein, Homo sapiens, U70477;supported by full-length cDNA: Ceres:25769.          | 250843_at   | -0.6 |
| sulphite reductase ; supported by cDNA: gi_13358216_gb_AF325027.2_AF325027                                                                       | 250846_at   | -0.6 |
| unknown protein                                                                                                                                  | 250857_at   | -0.6 |
| putative protein similar to unknown protein (emb CAB88360.1);supported by full-length cDNA: Ceres:29476.                                         | 250764_at   | -0.6 |
| putative protein contains similarity to transmembrane transport protein;supported by full-length cDNA: Ceres:249596.                             | 250315_at   | -0.6 |
| putative protein mRNA, Moritella marina, EMBL:AB025342                                                                                           | 250275_at   | -0.6 |
| transaldolase - like protein transaldolase, Solanum tuberosum, EMBL:U95923;supported by full-length cDNA: Ceres:32114.                           | 250234_at   | -0.6 |
| putative protein                                                                                                                                 | 250075_at   | -0.6 |
| glutamate dehydrogenase (EC 1.4.1.-) 1 (pir  S71217) ; supported by cDNA: gi_15146203_gb_AY049243.1_                                             | 250032_at   | -0.6 |
| synaptobrevin-like protein                                                                                                                       | 249930_at   | -0.6 |
| chorismate mutase/prephenate dehydratase-like protein ; supported by cDNA: gi_16604397_gb_AY058097.1_                                            | 249910_at   | -0.6 |
| 2-isopropylmalate synthase-like; homocitrate synthase-like ; supported by cDNA: gi_12330688_gb_AF327648.1_AF327648                               | 249866_at   | -0.6 |
| unknown protein ;supported by full-length cDNA: Ceres:20919.                                                                                     | 249717_at   | -0.6 |
| putative protein similar to unknown protein (pir  S75762)                                                                                        | 249519_at   | -0.6 |
| cysteine-tRNA ligase -like protein cysteine-tRNA ligase, Arabidopsis thaliana, PIR:T47747                                                        | 249537_at   | -0.6 |
| putative protein predicted proteins - Arabidopsis thaliana                                                                                       | 249437_at   | -0.6 |
| putative protein contains similarity to 22 kDa peroxisomal membrane protein; supported by full-length cDNA: Ceres: 15499.                        | 249137_at   | -0.6 |
| aluminum-induced protein-like ; supported by full-length cDNA: Ceres: 12484.                                                                     | 249121_at   | -0.6 |
| putative protein similar to unknown protein (pir  T08416)                                                                                        | 248944_at   | -0.6 |
| 3-oxoacyl-[acyl-carrier-protein] synthase I precursor (beta-ketoacyl-acp synthase I) (KAS I) (sp P52410) ;supported by full-length cDNA: Ceres:3 | 248903_at   | -0.6 |
| AP47 50p (gb AAB88283.1) ; supported by cDNA: gi_14326519_gb_AF385713.1_AF385713                                                                 | 248858_at   | -0.6 |
| putative protein contains similarity to bHLH DNA-binding protein;supported by full-length cDNA: Ceres:35890.                                     | 248839_at   | -0.6 |

|                                                                                                                                                  |           |      |
|--------------------------------------------------------------------------------------------------------------------------------------------------|-----------|------|
| pantoate-beta-alanine ligase ;supported by full-length cDNA: Ceres:156371.                                                                       | 248680_at | -0.6 |
| protein kinase ;supported by full-length cDNA: Ceres:142106.                                                                                     | 248529_at | -0.6 |
| unknown protein ; supported by full-length cDNA: Ceres: 266744.                                                                                  | 248377_at | -0.6 |
| fructokinase 1 ; supported by cDNA: gi_13878052_gb_AF370289.1_AF370289                                                                           | 248381_at | -0.6 |
| putative protein similar to unknown protein (dbj BAA83359.1)                                                                                     | 248340_at | -0.6 |
| putative protein contains similarity to GTPase activating protein                                                                                | 248313_at | -0.6 |
| pyruvate kinase ;supported by full-length cDNA: Ceres:109919.                                                                                    | 248283_at | -0.6 |
| membrane associated protein ; supported by cDNA: gi_1800146_gb_U83655.1_ATU83655                                                                 | 248195_at | -0.6 |
| 1,4-benzoquinone reductase-like; Trp repressor binding protein-like                                                                              | 248162_at | -0.6 |
| protein translation factor Sui1 homolog (sp P41568)                                                                                              | 248126_at | -0.6 |
| putative protein contains similarity to polyadenylate-binding protein 5; supported by full-length cDNA: Ceres: 107768.                           | 248147_at | -0.6 |
| outward rectifying potassium channel KCO ;supported by full-length cDNA: Ceres:32253.                                                            | 248027_at | -0.6 |
| RNA-binding protein-like                                                                                                                         | 247994_at | -0.6 |
| phosphoinositide specific phospholipase C ; supported by cDNA: gi_1526413_dbj_D38544.1_ATHATPLC1                                                 | 247794_at | -0.6 |
| D-xylose-H+ symporter - like protein D-xylose-H+ symporter, Lactobacillus brevis, EMBL:AF045552                                                  | 247709_at | -0.6 |
| putative protein various predicted proteins, Arabidopsis thaliana                                                                                | 247470_at | -0.6 |
| KED - like protein KED, Nicotiana tabacum, EMBL:AB009883                                                                                         | 247480_at | -0.6 |
| permease 1 - like protein permease 1, common ice plant, PIR:T12309; supported by cDNA: gi_14334659_gb_AY035003.1_                                | 247404_at | -0.6 |
| 3(2),5-bisphosphate nucleotidase ; supported by cDNA: gi_15281147_gb_AY034894.1_                                                                 | 247313_at | -0.6 |
| putative protein contains similarity to glutamyl-tRNA amidotransferase subunit A; supported by cDNA: gi_8163874_gb_AF223949.1_AF223949           | 247262_at | -0.6 |
| ABC transporter-like                                                                                                                             | 247232_at | -0.6 |
| NifS-like aminotransferase ; supported by cDNA: gi_15292880_gb_AY050874.1_                                                                       | 247164_at | -0.6 |
| putative protein similar to unknown protein (sp P55606); supported by cDNA: gi_14190422_gb_AF378889.1_AF378889                                   | 247077_at | -0.6 |
| cyclin D3-like protein ;supported by full-length cDNA: Ceres:36467.                                                                              | 247034_at | -0.6 |
| putative protein similar to unknown protein (pir T08445);supported by full-length cDNA: Ceres:11651.                                             | 246952_at | -0.6 |
| unknown protein ; supported by cDNA: gi_15293272_gb_AY051070.1_                                                                                  | 246954_at | -0.6 |
| putative protein ;supported by full-length cDNA: Ceres:39714.                                                                                    | 246797_at | -0.6 |
| putative protein predicted proteins, Arabidopsis thaliana;supported by full-length cDNA: Ceres:38304.                                            | 246792_at | -0.6 |
| putative protein predicted protein, Arabidopsis thaliana;supported by full-length cDNA: Ceres:98046.                                             | 246593_at | -0.6 |
| ribosomal protein-like 40S RIBOSOMAL PROTEINs - different species;supported by full-length cDNA: Ceres:25543.                                    | 246527_at | -0.6 |
| stearoyl-acyl carrier protein desaturase stearoyl-acyl carrier protein desaturase sad1 - Linum usitatissimum, EMBL:AJ006957;supported by full-le | 246502_at | -0.6 |
| hypothetical protein ;supported by full-length cDNA: Ceres:22757.                                                                                | 246443_at | -0.6 |
| Ca2+/H+-exchanging protein-like Arabidopsis thaliana high affinity calcium antiporter CAX1 encoded by GenBank Accession Number U57411            | 246302_at | -0.6 |
| putative nuclear DNA-binding protein G2p Mus musculus p38-2G4 protein: SwissProt Accession Number P50580; supported by cDNA: gi_145328           | 246307_at | -0.6 |
| unknown protein                                                                                                                                  | 246286_at | -0.6 |
| hypothetical protein                                                                                                                             | 246280_at | -0.6 |
| putative protein various predicted proteins, Arabidopsis thaliana and others;supported by full-length cDNA: Ceres:5850.                          | 246170_at | -0.6 |
| T-complex protein 1, beta subunit T-COMPLEX PROTEIN 1, BETA SUBUNIT, Homo sapiens, EMBL:AF026293;supported by full-length cDNA: C                | 246191_at | -0.6 |
| cinnamyl-alcohol dehydrogenase - like protein cinnamyl-alcohol dehydrogenase, apple tree, PIR:T16995;supported by full-length cDNA: Ceres:6      | 246042_at | -0.6 |
| glycerol-3-phosphate acyltransferase identical to glycerol-3-phosphate acyltransferase GB:Q43307 from [Arabidopsis thaliana]                     | 245790_at | -0.6 |
| phosphate-induced (phi-1) protein, putative similar to phi-1 GB:BAA33810 GI:3759184 from [Nicotiana tabacum];supported by full-length cDNA: C    | 245757_at | -0.6 |
| rec - like protein                                                                                                                               | 245695_at | -0.6 |
| pullulanase-like protein (starch debranching enzyme)                                                                                             | 245712_at | -0.6 |
| hypothetical protein                                                                                                                             | 245600_at | -0.6 |

|                                                                                                                                                  |             |      |
|--------------------------------------------------------------------------------------------------------------------------------------------------|-------------|------|
| cyanohydrin lyase like protein ;supported by full-length cDNA: Ceres:5546.                                                                       | 245349_at   | -0.6 |
| ribosomal protein ;supported by full-length cDNA: Ceres:15384.                                                                                   | 245372_at   | -0.6 |
| Expressed protein ; supported by full-length cDNA: Ceres: 30471.                                                                                 | 245320_at   | -0.6 |
| putative protein ; supported by cDNA: gi_14190518_gb_AF380659.1_AF380659                                                                         | 245279_at   | -0.6 |
| phytoene dehydrogenase precursor (phytoene desaturase) ; supported by cDNA: gi_14532765_gb_AY040007.1_                                           | 245284_at   | -0.6 |
| putative synaptobrevin ;supported by full-length cDNA: Ceres:2443.                                                                               | 245167_s_at | -0.6 |
| 60S ribosomal protein L7A ;supported by full-length cDNA: Ceres:6394.                                                                            | 245121_at   | -0.6 |
| putative alpha/beta hydrolase contains Pfam profile: PF00561 alpha/beta hydrolase fold; predicted by genscan                                     | 257533_at   | -0.6 |
| putative electron transfer flavoprotein ubiquinone oxidoreductase                                                                                | 260536_at   | -0.6 |
| glucose-6-phosphate isomerase, cytosolic (GPI) (phosphoglucose isomerase) (PGI) (phosphohexose isomerase) (PHI) (sp P34795) ; supported          | 249163_at   | -0.6 |
| putative chlorophyll a/b binding protein ; supported by full-length cDNA: Ceres: 6454.                                                           | 265722_at   | -0.6 |
| putative WD-40 repeat protein, MSI2 ;supported by full-length cDNA: Ceres:40637.                                                                 | 265383_at   | -0.6 |
| protein phosphatase type 2C, putative similar to GB:AAD17805 from (Lotus japonicus) (Proc. Natl. Acad. Sci. U.S.A. 96 (4), 1738-1743 (1999))     | 262408_at   | -0.6 |
| unknown protein ; supported by cDNA: gi_16649026_gb_AY059883.1_                                                                                  | 261867_at   | -0.6 |
| unknown protein ; supported by cDNA: gi_15215745_gb_AY050402.1_                                                                                  | 261208_at   | -0.6 |
| unknown protein                                                                                                                                  | 256173_at   | -0.6 |
| hypothetical protein predicted by genscan                                                                                                        | 255874_at   | -0.6 |
| putative potassium/H+ antiporter                                                                                                                 | 255686_at   | -0.6 |
| unknown protein ;supported by full-length cDNA: Ceres:8255.                                                                                      | 245780_at   | -0.6 |
| Arabidopsis thaliana /REF=M64116 /DEF=glyceraldehyde 3-phosphate dehydrogenase C subunit (GapC) gene, complete cds /LEN=1295 (-5, -3r2-At-GAPDH- |             | -0.5 |
| hypothetical protein predicted by genefinder;supported by full-length cDNA: Ceres:38147.                                                         | 267601_at   | -0.5 |
| unknown protein                                                                                                                                  | 267587_at   | -0.5 |
| MADS-box protein (AGL20) ; supported by full-length cDNA: Ceres: 5467.                                                                           | 267509_at   | -0.5 |
| unknown protein ;supported by full-length cDNA: Ceres:26701.                                                                                     | 267366_at   | -0.5 |
| citrate synthase similar to GB:X17528, 10 possible frameshifts in that submission.;supported by full-length cDNA: Ceres:16528.                   | 267368_at   | -0.5 |
| 60S acidic ribosomal protein P0                                                                                                                  | 267349_at   | -0.5 |
| putative serine carboxypeptidase I ;supported by full-length cDNA: Ceres:33165.                                                                  | 267256_s_at | -0.5 |
| putative adenosine phosphosulfate kinase identical to GB:U05238;supported by full-length cDNA: Ceres:14216.                                      | 267112_at   | -0.5 |
| 60S ribosomal protein L35 ;supported by full-length cDNA: Ceres:11583.                                                                           | 266980_at   | -0.5 |
| unknown protein ;supported by full-length cDNA: Ceres:150205.                                                                                    | 266949_s_at | -0.5 |
| Expressed protein ; supported by full-length cDNA: Ceres: 19349.                                                                                 | 266906_at   | -0.5 |
| putative nucleotide-binding protein ;supported by full-length cDNA: Ceres:33511.                                                                 | 266801_at   | -0.5 |
| putative expansin Experimental evidence from Dr. Daniel Cosgrove at Penn State Univ. <dCosgrove@psu.edu>                                         | 266770_at   | -0.5 |
| putative RAV-like B3 domain DNA binding protein                                                                                                  | 266760_at   | -0.5 |
| unknown protein ;supported by full-length cDNA: Ceres:12086.                                                                                     | 266646_at   | -0.5 |
| glycine decarboxylase complex H-protein ; supported by cDNA: gi_15810183_gb_AY056106.1_                                                          | 266517_at   | -0.5 |
| putative small nuclear ribonucleoprotein D2 ;supported by full-length cDNA: Ceres:26123.                                                         | 266482_at   | -0.5 |
| 3-isopropylmalate dehydratase, small subunit ; supported by cDNA: gi_16974632_gb_AY060594.1_                                                     | 266395_at   | -0.5 |
| putative protein transport protein SEC12p identical to GB:M95796, contains a WD-40 repeat domain; supported by cDNA: gi_166877_gb_M9579          | 266350_at   | -0.5 |
| putative auxin transport protein ; supported by cDNA: gi_7109714_gb_AF087016.1_AF087016                                                          | 266300_at   | -0.5 |
| ethylene-insensitive3-like1 (EIL1) identical to GB:AF004213; related to ethylene-insensitive3 (ethylene signaling pathway)                       | 266302_at   | -0.5 |
| putative endoxyloglucan glycosyltransferase identical to GB:D16454;supported by full-length cDNA: Ceres:15276.                                   | 266215_at   | -0.5 |
| unknown protein ;supported by full-length cDNA: Ceres:114031.                                                                                    | 266167_at   | -0.5 |
| enoyl-ACP reductase (enr-A)                                                                                                                      | 266035_at   | -0.5 |



|                                                                                                                                                    |           |      |
|----------------------------------------------------------------------------------------------------------------------------------------------------|-----------|------|
| putative peptide methionine sulfoxide reductase                                                                                                    | 265804_at | -0.5 |
| unknown protein ;supported by full-length cDNA: Ceres:41585.                                                                                       | 265717_at | -0.5 |
| putative Tub family protein                                                                                                                        | 265321_at | -0.5 |
| hypothetical protein predicted by genscan; supported by full-length cDNA: Ceres: 32047.                                                            | 265336_at | -0.5 |
| auxin-regulated protein (IAA8) ;supported by full-length cDNA: Ceres:37274.                                                                        | 265319_at | -0.5 |
| unknown protein ; supported by cDNA: gi_16604403_gb_AY058100.1_                                                                                    | 265132_at | -0.5 |
| hypothetical protein predicted by genscan+                                                                                                         | 265162_at | -0.5 |
| unknown protein 3 -end of protein contains similarity to thioredoxins; supported by cDNA: gi_15215811_gb_AY050435.1_                               | 265104_at | -0.5 |
| beta-fructosidase nearly identical to beta-fructosidase GB:CAA67560 GI:1429209 (Arabidopsis thaliana); supported by cDNA: gi_14517549_gb_A         | 265118_at | -0.5 |
| zinc finger protein 7, ZFP7 ; supported by cDNA: gi_790684_gb_L39650.1_ATHZFPG                                                                     | 265029_at | -0.5 |
| putative thioredoxin similar to ESTs gb T46281, gb R83933, gb N65879, emb F14466, gb N96726, gb AA042340, and emb Z18150; supported by             | 264779_at | -0.5 |
| hypothetical protein predicted by genemark.hmm; supported by cDNA: gi_16209657_gb_AY057594.1_                                                      | 264769_at | -0.5 |
| germin-like protein Identical to Arabidopsis germin-like protein, gij1755178. Location of EST 180L10T7, gij906417; supported by cDNA: gi_13265     | 264506_at | -0.5 |
| adenine phosphoribosyltransferase 1, APRT identical to GB:P31166; similar to ESTs gb N65531, gb R90631, gb T21275, and gb AA713070;sup             | 264439_at | -0.5 |
| potassium transporter, putative similar to potassium transporter GI:2654088 from [Arabidopsis thaliana]                                            | 264247_at | -0.5 |
| putative 40S ribosomal protein S18 Match to ribosomal S18 gene mRNA gb Z28701, DNA gb Z23165 from A. thaliana. ESTs gb T21121, gb Z17              | 264203_at | -0.5 |
| putative steroid sulfotransferase ; supported by cDNA: gi_599639_emb_Z46823.1_ATT54391                                                             | 264042_at | -0.5 |
| putative auxin-regulated protein                                                                                                                   | 264014_at | -0.5 |
| unknown protein                                                                                                                                    | 263942_at | -0.5 |
| putative vacuolar proton-ATPase subunit ; supported by cDNA: gi_15450750_gb_AY053417.1_                                                            | 263764_at | -0.5 |
| putative CONSTANS-like B-box zinc finger protein ; supported by cDNA: gi_16974588_gb_AY060570.1_                                                   | 263739_at | -0.5 |
| Expressed protein ; supported by cDNA: gi_13877876_gb_AF370201.1_AF370201                                                                          | 263550_at | -0.5 |
| putative Rieske iron-sulfur protein ;supported by full-length cDNA: Ceres:29774.                                                                   | 263533_at | -0.5 |
| putative root iron transporter protein                                                                                                             | 263480_at | -0.5 |
| unknown protein ; supported by full-length cDNA: Ceres: 11283.                                                                                     | 263399_at | -0.5 |
| putative snRNP splicing factor ;supported by full-length cDNA: Ceres:97480.                                                                        | 263332_at | -0.5 |
| unknown protein                                                                                                                                    | 263242_at | -0.5 |
| unknown protein                                                                                                                                    | 263247_at | -0.5 |
| delta 9 desaturase ALMOST identical (4 aa diff t) to GP:2970036;supported by full-length cDNA: Ceres:21841.                                        | 263249_at | -0.5 |
| unknown protein similar to ESTs gb T43206, gb H76501, gb AA651577, and gb AA605326;supported by full-length cDNA: Ceres:7488.                      | 263206_at | -0.5 |
| putative glutaredoxin Strong similarity to gb Z49699 glutaredoxin from Ricinus communis                                                            | 263168_at | -0.5 |
| putative HMG protein ;supported by full-length cDNA: Ceres:24090.                                                                                  | 263074_at | -0.5 |
| endo-beta-1,4-glucanase, putative similar to endo-beta-1,4-glucanase GB:AAC12685 GI:3025470 from [Pinus radiata];supported by full-length c        | 262980_at | -0.5 |
| ABC transporter, putative similar to ABC transporter GI:9279716 from [Arabidopsis thaliana]                                                        | 262899_at | -0.5 |
| xyloglucan endo-transglycosylase, putative similar to xyloglucan endo-transglycosylase GB:CAA63553 GI:1769907 [Arabidopsis thaliana], identic      | 262842_at | -0.5 |
| signal response protein (GAI) identical to GAI GB:CAA75492 GI:2569938 [Arabidopsis thaliana] (Genes Dev. In press); supported by cDNA: gi_1(       | 262850_at | -0.5 |
| unknown protein ;supported by full-length cDNA: Ceres:1505.                                                                                        | 262609_at | -0.5 |
| unknown protein Location of ests 147K6T7 (gb T75883), 91C11T7 (gb AA067428), 162K21T7 (gb R29908), 91C11XP 3 (gb A1100498), 162K21                 | 262481_at | -0.5 |
| Mlo protein, putative similar to Mlo protein GB:Z83834 GI:1877220 from [Hordeum vulgare];supported by full-length cDNA: Ceres:259664.              | 262455_at | -0.5 |
| unknown protein ;supported by full-length cDNA: Ceres:35675.                                                                                       | 262050_at | -0.5 |
| unknown protein                                                                                                                                    | 261854_at | -0.5 |
| acyl-(acyl carrier protein) thioesterase, putative almost identical to acyl-(acyl carrier protein) thioesterase GB:CAA85387 GI:634003 from [Arabid | 261722_at | -0.5 |
| unknown protein ;supported by full-length cDNA: Ceres:8976.                                                                                        | 261566_at | -0.5 |
| acid phosphatase, putative similar to acid phosphatase GI:5360721 from [Lupinus albus]; supported by cDNA: gi_13605749_gb_AF361856.1_AF            | 261492_at | -0.5 |

|                                                                                                                                                      |             |      |
|------------------------------------------------------------------------------------------------------------------------------------------------------|-------------|------|
| globulin-like protein similar to GB:7595348 from [Cucumis melo];supported by full-length cDNA: Ceres:40551.                                          | 261415_at   | -0.5 |
| expansin S2 precursor, putative similar to GB:U30460 from [Cucumis sativus];supported by full-length cDNA: Ceres:11011.                              | 261226_at   | -0.5 |
| beta tubulin 1, putative similar to GB:AAD02498 from [Arabidopsis thaliana] (Plant Mol. Biol. 39 (1), 171-176 (1999)); supported by cDNA: gi_136     | 261230_at   | -0.5 |
| putative calcium-binding protein, calreticulin similar to SP:P12858 from [Arabidopsis thaliana]                                                      | 261197_at   | -0.5 |
| heat shock factor protein hsf8, putative predicted by genemark.hmm; supported by cDNA: gi_15028376_gb_AY045991.1_                                    | 261206_at   | -0.5 |
| MAP3K alpha protein kinase, putative similar to MAP3K alpha protein kinase GB:CAA08994 GI:3688191 from [Arabidopsis thaliana]; supported t           | 260988_at   | -0.5 |
| ethylene response factor, putative similar to ethylene response factor 1 GB:AAD03544 GI:4128208 from [Arabidopsis thaliana]                          | 260783_at   | -0.5 |
| signal recognition particle 19 kDa protein subunit, putative similar to GB:U19030 from [Oryza sativa] (Plant Mol. Biol. 34 (3), 507-515 (1997)); sup | 260726_at   | -0.5 |
| pyruvate kinase, plastid isozyme, putative similar to GB:Z28374 from [Nicotiana tabacum] (Plant Mol. Biol. 27 (1), 79-89 (1995)); supported by cL    | 260653_at   | -0.5 |
| hypothetical protein contains similarity to CDP-diacylglycerol synthase 2 GI:3892191 from [ Homo sapiens]                                            | 260636_at   | -0.5 |
| ACC oxidase, putative similar to ACC oxidase GI:587086 from [Brassica oleracea]; supported by cDNA: gi_15028038_gb_AY045876.1_                       | 260637_at   | -0.5 |
| membrane related protein CP5, putative similar to GB:AAD28760 from [Arabidopsis thaliana]; supported by cDNA: gi_16604620_gb_AY059755.               | 260603_at   | -0.5 |
| unknown protein ;supported by full-length cDNA: Ceres:40573.                                                                                         | 260429_at   | -0.5 |
| putative peptide transporter similar to peptide transporter GB:AAC32034 [Hordeum vulgare]; supported by full-length cDNA: Ceres: 22243.              | 260410_at   | -0.5 |
| 60S ribosomal protein L34, putative similar to SP:Q42351 from (Arabidopsis thaliana); supported by full-length cDNA: Ceres: 1568.                    | 260369_at   | -0.5 |
| hypothetical protein predicted by genscan+                                                                                                           | 260277_at   | -0.5 |
| putative reductase similar to cinnamoyl CoA reductase GB:CAA12276 [Populus balsamifera subsp. trichocarpa], aldehyde reductase GB:AAD53!             | 260260_at   | -0.5 |
| putative phosphoglucomutase similar to phosphoglucomutase GB:AAC00601 [Arabidopsis thaliana]                                                         | 260207_at   | -0.5 |
| calmodulin-4 identical to GB:Q03510 from [Arabidopsis thaliana] (Plant Mol. Biol. 22 (2), 215-225 (1993)); supported by full-length cDNA: Ceres:     | 260138_at   | -0.5 |
| unknown protein ; supported by cDNA: gi_15450975_gb_AY054568.1_                                                                                      | 260058_at   | -0.5 |
| putative helix-loop-helix DNA-binding protein contains Pfam profile: PF00010 Helix-loop-helix DNA-binding domain                                     | 260070_at   | -0.5 |
| unknown protein contains non-consensus GG donor splice site at exon2; modeled to est match.;supported by full-length cDNA: Ceres:124169.             | 260007_at   | -0.5 |
| hypothetical protein predicted by genemark.hmm                                                                                                       | 259850_at   | -0.5 |
| Expressed protein ; supported by full-length cDNA: Ceres: 30602.                                                                                     | 259789_at   | -0.5 |
| putative phosphatidylinositol-4-phosphate-5-kinase similar to phosphatidylinositol-4-phosphate-5-kinase GB:CAB53377 [Arabidopsis thaliana]           | 259677_at   | -0.5 |
| nitrate reductase 1 (NR1) identical to nitrate reductase 1 (NR1) GB:P11832 [Arabidopsis thaliana]; supported by cDNA: gi_15983498_gb_AF4246          | 259681_at   | -0.5 |
| 20S proteasome beta subunit (PBG1) identical to 20S proteasome beta subunit (PBG1) GI:3421123 [Arabidopsis thaliana]; supported by cDNA: c           | 259604_at   | -0.5 |
| embryo abundance protein (EMB20), putative similar to embryo abundance protein (EMB20) GI:1350503 from [Picea glauca]                                | 259486_at   | -0.5 |
| unknown protein                                                                                                                                      | 259434_at   | -0.5 |
| hypothetical protein similar to putative glycosyl transferase GI:6862930 from [Arabidopsis thaliana];supported by full-length cDNA: Ceres:117402.    | 259358_at   | -0.5 |
| glyceraldehyde-3-phosphate dehydrogenase, putative similar to glyceraldehyde-3-phosphate dehydrogenase GI:21143 from (Sinapis alba); supp            | 259361_at   | -0.5 |
| allene oxide cyclase, putative similar to allene oxide cyclase GI:8977961 from [Lycopersicon esculentum]; supported by cDNA: gi_16323064_gb_         | 259366_at   | -0.5 |
| unknown protein similar to unknown protein GB:AAC42254 [Arabidopsis thaliana]                                                                        | 259335_s_at | -0.5 |
| lycopene beta cyclase identical to lycopene beta cyclase GB:AAB53337 [Arabidopsis thaliana]; supported by cDNA: gi_1399182_gb_U50739.1_              | 259140_at   | -0.5 |
| transport protein SEC13, putative similar to protein transport protein SEC13 GB:P53024 [Pichia pastoris];supported by full-length cDNA: Ceres:3      | 259119_at   | -0.5 |
| putative ribosomal protein L13 similar to putative ribosomal protein L13 GB:AAC07691 [Aquifex aeolicus]                                              | 258995_at   | -0.5 |
| unknown protein similar to unknown proteins GB:AAD24625 [Arabidopsis thaliana], GB:AAC73026 [Arabidopsis thaliana]                                   | 258933_at   | -0.5 |
| glutathione S-transferase identical to glutathione S-transferase GB:AAB09584 from [Arabidopsis thaliana]; supported by cDNA: gi_1575751_gb_L         | 258851_at   | -0.5 |
| S-adenosylmethionine decarboxylase identical to GB:Q96286 from [Arabidopsis thaliana]; supported by cDNA: gi_14596072_gb_AY042824.1_                 | 258500_at   | -0.5 |
| unknown protein                                                                                                                                      | 258418_at   | -0.5 |
| putative ribosomal protein similar to ribosomal protein L41 GB:AAA34366 from [Candida maltosa]; supported by full-length cDNA: Ceres: 13557.         | 258296_at   | -0.5 |
| putative WD-repeat protein contains Pfam profile: PF00400 WD domain, G-beta repeat (7 copies)                                                        | 258268_at   | -0.5 |
| transport protein, putative similar to transport protein GB:CAB10195 from [Arabidopsis thaliana]                                                     | 258097_at   | -0.5 |
| MAP kinase kinase 5 identical to GB:BAA28831 from [Arabidopsis thaliana]; supported by cDNA: gi_3219272_dbj_AB015316.1_AB015316                      | 258046_at   | -0.5 |

|                                                                                                                                                   |             |      |
|---------------------------------------------------------------------------------------------------------------------------------------------------|-------------|------|
| unknown protein ;supported by full-length cDNA: Ceres:121587.                                                                                     | 258020_at   | -0.5 |
| putative UDP-glucose glucosyltransferase similar to GB:Q40284 from [Manihot esculenta]; supported by cDNA: gi_13937235_gb_AF372973.1_A            | 257954_at   | -0.5 |
| hypothetical protein                                                                                                                              | 257875_at   | -0.5 |
| hypothetical protein predicted by genefinder;supported by full-length cDNA: Ceres:116381.                                                         | 257855_at   | -0.5 |
| hypothetical protein predicted by genscan, similar to iojap protein GB:S28019 from [Zea mays];supported by full-length cDNA: Ceres:39638.         | 257856_at   | -0.5 |
| TOM20, putative similar to TOM20 GB:CAA63223 from [Solanum tuberosum];supported by full-length cDNA: Ceres:30812.                                 | 257792_at   | -0.5 |
| unknown protein ;supported by full-length cDNA: Ceres:17962.                                                                                      | 257800_at   | -0.5 |
| hypothetical protein predicted by genemark.hmm                                                                                                    | 257687_at   | -0.5 |
| glucan endo-1,3-beta-glucosidase precursor, putative similar to GB:P52409 from [ Triticum aestivum]; supported by cDNA: gi_14334497_gb_AY(        | 256962_at   | -0.5 |
| 20S proteasome subunit PAC1 identical to GB:AAC32057 from [Arabidopsis thaliana] (Genetics (1998) 149 (2), 677-692);supported by full-length      | 256795_at   | -0.5 |
| dTDP-glucose 4,6-dehydratase, putative similar to dTDP-glucose 4,6-dehydratase GB:AE000666 GI:6626257 from [Methanobacterium thermoa              | 256575_at   | -0.5 |
| amino acid permease, putative contains Pfam profile: PF00324 amino acid permease                                                                  | 256567_at   | -0.5 |
| putative clathrin heavy chain similar to clathrin heavy chain GB:AAC49294 [Glycine max]                                                           | 256437_s_at | -0.5 |
| ATP-dependent Clp protease proteolytic subunit (ClpP3) identical to ATP-dependent Clp protease (nClpP3) GI:5360591 (Arabidopsis thaliana)         | 256411_at   | -0.5 |
| protein phosphatase 2C, putative contains Pfam profile: PF00481 Protein phosphatase 2C                                                            | 256279_at   | -0.5 |
| 60S acidic ribosomal protein, putative similar to 60S acidic ribosomal protein P0 GI:2088654 [Arabidopsis thaliana];supported by full-length cDNA | 256253_at   | -0.5 |
| unknown protein ; supported by cDNA: gi_15081663_gb_AY048224.1_                                                                                   | 256076_at   | -0.5 |
| ribosomal protein, putative similar to ribosomal protein L35a GI:57118 from [Rattus norvegicus]; supported by full-length cDNA: Ceres: 2778.      | 256065_at   | -0.5 |
| UDP-glucose glucosyltransferase, putative similar to UDP-glucose glucosyltransferase GI:453245 from [Manihot esculenta]; supported by cDNA:       | 256033_at   | -0.5 |
| unknown protein ;supported by full-length cDNA: Ceres:16380.                                                                                      | 255925_at   | -0.5 |
| unknown protein ;supported by full-length cDNA: Ceres:35273.                                                                                      | 255817_at   | -0.5 |
| phosphoprotein phosphatase 2A, regulatory subunit A identical to phosphoprotein phosphatase 2A, regulatory subunit A GI:1262171 from [Arabid      | 255731_at   | -0.5 |
| unknown protein ;supported by full-length cDNA: Ceres:25047.                                                                                      | 255721_at   | -0.5 |
| hypothetical protein                                                                                                                              | 255589_s_at | -0.5 |
| putative ribonucleoprotein similarity to ovarian RNA-binding protein and translational control factor (bruno)- Drosophila melanogaster,EMBL:DMU5  | 255411_at   | -0.5 |
| hypothetical protein                                                                                                                              | 255429_at   | -0.5 |
| putative xyloglucan endotransglycosylase ;supported by full-length cDNA: Ceres:17748.                                                             | 255433_at   | -0.5 |
| putative GH3-like protein similar to soybean GH3 auxin-inducible protein, GenBank accession number X60033; supported by cDNA: gi_1664914:         | 255403_at   | -0.5 |
| predicted protein of unknown function ; supported by cDNA: gi_15810532_gb_AY056305.1_                                                             | 255332_at   | -0.5 |
| coded for by A. thaliana cDNA AA041141 ;supported by full-length cDNA: Ceres:6687.                                                                | 255290_at   | -0.5 |
| contains similarity to S. cerevisiae vacuolar protein sorting-associataed protein VPS28 (GB:U39205)                                               | 255253_at   | -0.5 |
| putative protein ADRENODOXIN PRECURSOR (adx1), Rickettsia prowazekii, gb:CAA14664;supported by full-length cDNA: Ceres:17223.                     | 255233_at   | -0.5 |
| putative protein hypothetical protein - Arabidopsis thaliana,PIR:F71409;supported by full-length cDNA: Ceres:22715.                               | 255243_at   | -0.5 |
| putative protein hypothetical protein sll1775 - Synechocystis sp.,PIR2:S77106                                                                     | 255008_at   | -0.5 |
| putative protein beta-phosphoglucomutase - Lactobacillus sanfrancisco,PID:e1331347; supported by cDNA: gi_16648788_gb_AY058171.1_                 | 254874_at   | -0.5 |
| putative protein ; supported by cDNA: gi_15292760_gb_AY050814.1_                                                                                  | 254561_at   | -0.5 |
| aspartate kinase-homoserine dehydrogenase - like protein ak-hsdh bifunctional enzyme precursor, Arabidopsis thaliana, PIR2:S46497                 | 254535_at   | -0.5 |
| lectin like protein lectin phloem protein PP2, winter squash, PIR2:S38462;supported by full-length cDNA: Ceres:17437.                             | 254551_at   | -0.5 |
| putative protein ; supported by cDNA: gi_14488265_dbj_AB063253.1_AB063253                                                                         | 254306_at   | -0.5 |
| putative polygalacturonase polygalacturonase (EC 3.2.1.15) - avocado, EMBL:X66426                                                                 | 254221_at   | -0.5 |
| hypothetical protein                                                                                                                              | 254178_at   | -0.5 |
| acyl-CoA synthetase - like protein acyl-CoA synthetase, Brassica napus, X94624; supported by cDNA: gi_15146195_gb_AY049239.1_                     | 254192_at   | -0.5 |
| clathrin coat assembly like protein clathrin-associated protein AP50 homolog CEAP,Caenorhabditis elegans, PIR2:B49837                             | 254172_at   | -0.5 |
| putative protein ;supported by full-length cDNA: Ceres:16463.                                                                                     | 254103_at   | -0.5 |

|                                                                                                                                             |           |      |
|---------------------------------------------------------------------------------------------------------------------------------------------|-----------|------|
| hnRNP-like protein ; supported by cDNA: gi_16930502_gb_AF419605.1_AF419605                                                                  | 253926_at | -0.5 |
| fimbrin-like protein (ATFIM1) ; supported by cDNA: gi_2905892_gb_U66424.1_ATU66424                                                          | 253956_at | -0.5 |
| putative protein protein disulfide-isomerase (EC 5.3.4.1) -Aspergillus niger,PID:g899149; supported by cDNA: Ceres: 113279.                 | 253899_at | -0.5 |
| putative protein hypothetical protein F28M11.90 - Arabidopsis thaliana, Pir2:T04067                                                         | 253836_at | -0.5 |
| putative NADH dehydrogenase NADH dehydrogenase (ubiquinone) (EC 1.6.5.3) chain ND11 - yeast, PIR2:S26704;supported by full-length cDNA      | 253810_at | -0.5 |
| hypothetical protein                                                                                                                        | 253818_at | -0.5 |
| receptor-like protein kinase 5 precursor (RLK5) ; supported by cDNA: gi_166849_gb_M84660.1_ATHRLPKC                                         | 253779_at | -0.5 |
| protein phosphatase 2C-like protein protein phosphatase 2C-fission yeast, PIR2:S54297; supported by cDNA: gi_16604584_gb_AY059737.1_        | 253780_at | -0.5 |
| Expressed protein ; supported by cDNA: gi_16226360_gb_AF428378.1_AF428378                                                                   | 253740_at | -0.5 |
| putative protein KIAA0260 gene, human, PID:g1665787; supported by cDNA: gi_14596060_gb_AY042818.1_                                          | 253486_at | -0.5 |
| hypothetical protein ;supported by full-length cDNA: Ceres:35221.                                                                           | 253389_at | -0.5 |
| putative protein                                                                                                                            | 253414_at | -0.5 |
| catalase ; supported by cDNA: gi_15451165_gb_AY054663.1_                                                                                    | 253174_at | -0.5 |
| beta-galactosidase like protein ; supported by cDNA: gi_15810492_gb_AY056285.1_                                                             | 253090_at | -0.5 |
| squalene epoxidase - like protein squalene epoxidase, Panax ginseng, AB003516;supported by full-length cDNA: Ceres:118648.                  | 253039_at | -0.5 |
| putative protein other Arabidopsis hypothetical proteins; supported by cDNA: gi_15010783_gb_AY045693.1_                                     | 252999_at | -0.5 |
| putative transcription factor (MYB4) ; supported by cDNA: gi_3941411_gb_AF062860.1_AF062860                                                 | 252958_at | -0.5 |
| auxin-induced protein - like auxin-inducible SAUR gene, Raphanus sativus,AB000708;supported by full-length cDNA: Ceres:10140.               | 252972_at | -0.5 |
| calmodulin 7 ; supported by full-length cDNA: Ceres: 7008.                                                                                  | 252713_at | -0.5 |
| putative chloroplast prephenate dehydratase similar to bacterial PheA gene products                                                         | 252652_at | -0.5 |
| Expressed protein ; supported by full-length cDNA: Ceres: 41162.                                                                            | 252624_at | -0.5 |
| phosphoprotein phosphatase ;supported by full-length cDNA: Ceres:32787.                                                                     | 252471_at | -0.5 |
| 60S ribosomal protein L13, BBC1 protein ;supported by full-length cDNA: Ceres:12182.                                                        | 252294_at | -0.5 |
| hypothetical protein ;supported by full-length cDNA: Ceres:35598.                                                                           | 252231_at | -0.5 |
| CDPK-related protein kinase                                                                                                                 | 252158_at | -0.5 |
| protein kinase SPK-2 ;supported by full-length cDNA: Ceres:3988.                                                                            | 252166_at | -0.5 |
| hypothetical protein ; supported by cDNA: gi_13605735_gb_AF361849.1_AF361849                                                                | 252170_at | -0.5 |
| monodehydroascorbate reductase (NADH) - like protein monodehydroascorbate reductase (NADH), Lycoperison esculentum, PIR:T06407;suppc        | 252024_at | -0.5 |
| 60S ribosomal protein - like 60S ribosomal protein L24, Arabidopsis thaliana, EMBL:AC006282; supported by cDNA: gi_16648705_gb_AY058121     | 251997_at | -0.5 |
| Gluthatione reductase, chloroplast precursor ; supported by cDNA: gi_15451193_gb_AY054677.1_                                                | 251860_at | -0.5 |
| synaptic glycoprotein SC2-like protein synaptic glycoprotein SC2 spliced variant, Homo sapiens, EMBL:AF038958;supported by full-length cDNA | 251796_at | -0.5 |
| cytosolic triosephosphatisomerase ;supported by full-length cDNA: Ceres:28516.                                                              | 251801_at | -0.5 |
| putative protein CHLOROPLAST 30S RIBOSOMAL PROTEIN S20, SWISSPROT:RR20_GUITH; supported by cDNA: gi_15810456_gb_AY0562                      | 251744_at | -0.5 |
| mandelonitrile lyase-like protein ADHESION OF CALYX EDGES (ACE) - Arabidopsis thaliana; supported by cDNA: gi_15982754_gb_AY057484.         | 251746_at | -0.5 |
| 3-isopropylmalate dehydratase-like protein (small subunit) 3-isopropylmalate dehydratase, small subunit - Thermotoga maritima, PIR:A72363   | 251524_at | -0.5 |
| putative protein hypothetical protein F6G17.90 - Arabidopsis thaliana, PIR:T04738                                                           | 251476_at | -0.5 |
| cysteine synthase                                                                                                                           | 251487_at | -0.5 |
| Expressed protein ; supported by full-length cDNA: Ceres: 42545.                                                                            | 251409_at | -0.5 |
| transketolase - like protein transketolase, Solanum tuberosum, EMBL:Z50099;supported by full-length cDNA: Ceres:15659.                      | 251396_at | -0.5 |
| putative protein embryonic abundant protein EMB34 - Picea glauca, EMBL:L47672                                                               | 251360_at | -0.5 |
| putative protein                                                                                                                            | 251058_at | -0.5 |
| 60S ribosomal protein - like 60S ribosomal protein L36, Arabidopsis thaliana, EMBL:AC004684;supported by full-length cDNA: Ceres:30903.     | 251018_at | -0.5 |
| putative protein various predicted proteins, Brassica rapa, Arabidopsis thaliana;supported by full-length cDNA: Ceres:26538.                | 251013_at | -0.5 |
| putative protein ;supported by full-length cDNA: Ceres:17471.                                                                               | 250969_at | -0.5 |

|                                                                                                                                                     |             |      |
|-----------------------------------------------------------------------------------------------------------------------------------------------------|-------------|------|
| putative protein                                                                                                                                    | 250944_at   | -0.5 |
| monodehydroascorbate reductase (NADH) - like protein monodehydroascorbate reductase (NADH), cucumber, PIR:JU0182;supported by full-ler              | 250916_at   | -0.5 |
| GTP-binding protein (gb AAD09203.1) ;supported by full-length cDNA: Ceres:6734.                                                                     | 250813_at   | -0.5 |
| phosphate/phosphoenolpyruvate translocator protein-like                                                                                             | 250743_at   | -0.5 |
| 26S proteasome regulatory subunit S12 (MOV34 protein) (sp O24412) ;supported by full-length cDNA: Ceres:34868.                                      | 250749_at   | -0.5 |
| putative protein similar to unknown protein (gb AAF02129.1);supported by full-length cDNA: Ceres:104017.                                            | 250734_at   | -0.5 |
| putative protein mammalian inositol hexakisphosphate kinase 2 - Homo sapiens, EMBL:AF177145;supported by full-length cDNA: Ceres:32892.             | 250607_at   | -0.5 |
| putative protein similar to unknown protein (sp P23438)supported by full-length cDNA: Ceres:16313.                                                  | 250209_at   | -0.5 |
| receptor-like protein kinase                                                                                                                        | 250102_at   | -0.5 |
| putative protein predicted proteins, Arabidopsis thaliana                                                                                           | 249982_at   | -0.5 |
| unknown protein                                                                                                                                     | 249900_at   | -0.5 |
| 26S proteasome, non-ATPase regulatory subunit ;supported by full-length cDNA: Ceres:23276.                                                          | 249796_at   | -0.5 |
| putative protein similar to unknown protein (pir T00970); supported by cDNA: gi_15215722_gb_AY050390.1_                                             | 249817_at   | -0.5 |
| putative protein                                                                                                                                    | 249610_at   | -0.5 |
| cytochrome b-561 (gb AAD45585.1) ;supported by full-length cDNA: Ceres:124838.                                                                      | 249523_at   | -0.5 |
| acyltransferase -like protein Anthocyanin 5-aromatic acyltransferase, Gentiana triflora, EMBL:AB010708;supported by full-length cDNA: Ceres:37      | 249493_at   | -0.5 |
| raffinose synthase -like protein raffinose synthase Rfs, Cucumis sativus, EMBL:AF073744                                                             | 249411_at   | -0.5 |
| succinate dehydrogenase iron-protein subunit -like succinate dehydrogenase iron-protein subunit (SDHB), Oryza sativa, EMBL:AB017428; supp           | 249343_at   | -0.5 |
| dynammin-like protein (pir  S59558) ;supported by full-length cDNA: Ceres:42932.                                                                    | 249232_at   | -0.5 |
| AtCLH2 (gb AAF27046.1) ; supported by cDNA: gi_6729676_gb_AF134302.1_AF134302                                                                       | 249091_at   | -0.5 |
| putative protein contains similarity to DNA-3-methyladenine glycosylase I;supported by full-length cDNA: Ceres:29551.                               | 249008_at   | -0.5 |
| 26S proteasome subunit-like protein                                                                                                                 | 248957_at   | -0.5 |
| sodium-dicarboxylate cotransporter-like ;supported by full-length cDNA: Ceres:107593.                                                               | 248756_at   | -0.5 |
| putative protein strong similarity to unknown protein (pir T05949)                                                                                  | 248769_at   | -0.5 |
| putative protein contains similarity to adenylate kinase; supported by cDNA: gi_15146327_gb_AY049305.1_                                             | 248748_at   | -0.5 |
| putative protein contains similarity to salt-inducible protein                                                                                      | 248669_at   | -0.5 |
| putative protein similar to unknown protein (gb AAC72543.1)                                                                                         | 248676_at   | -0.5 |
| pyruvate dehydrogenase E1 component beta subunit, mitochondrial precursor (PDHE1-B) (sp Q38799) ; supported by cDNA: gi_565064_gb_UC                | 248474_at   | -0.5 |
| phosphoglucomutase (emb CAB64725.1) ; supported by cDNA: gi_12004569_gb_AF216580.1_AF216580                                                         | 248380_at   | -0.5 |
| putative protein 3 (2 ), 5 -bisphosphate nucleotidase protein-like; also similar to yeast halotolerance protein HAL2;supported by full-length cDNA: | 248155_at   | -0.5 |
| serine threonine-specific protein kinase ATPK64 (pir  S20918)                                                                                       | 248034_at   | -0.5 |
| heat shock protein (emb CAA72514.1)                                                                                                                 | 248043_s_at | -0.5 |
| lycopene epsilon cyclase ; supported by cDNA: gi_14532799_gb_AY040024.1_                                                                            | 247936_at   | -0.5 |
| porin-like protein ;supported by full-length cDNA: Ceres:23726.                                                                                     | 247923_at   | -0.5 |
| eukaryotic initiation factor 4, eIF4-like protein ; supported by cDNA: gi_15810454_gb_AY056266.1_                                                   | 247839_at   | -0.5 |
| putative protein ;supported by full-length cDNA: Ceres:38797.                                                                                       | 247702_at   | -0.5 |
| histone H2B - like protein histone H2B, Arabidopsis thaliana, PIR:T47538;supported by full-length cDNA: Ceres:20822.                                | 247652_at   | -0.5 |
| zinc finger protein - like dof6 zinc finger protein, Arabidopsis thaliana, PIR:T47501;supported by full-length cDNA: Ceres:20852.                   | 247625_at   | -0.5 |
| putative protein predicted proteins from various species                                                                                            | 247636_at   | -0.5 |
| ABC transporter homolog PnATH - like PnATHABC transporter homolog, Populus nigra, EMBL:AB041505                                                     | 247593_at   | -0.5 |
| putative transcription factor MYB28 ; supported by cDNA: gi_5823328_gb_AF175998.1_AF175998                                                          | 247549_at   | -0.5 |
| dehydrogenase ; supported by cDNA: gi_15383743_gb_AY039787.1_                                                                                       | 247436_at   | -0.5 |
| putative protein strong similarity to unknown protein (emb CAB76911.1)                                                                              | 247362_at   | -0.5 |
| G protein-coupled receptor-like protein ; supported by cDNA: gi_15451139_gb_AY054650.1_                                                             | 247175_at   | -0.5 |

|                                                                                                                                                   |             |      |
|---------------------------------------------------------------------------------------------------------------------------------------------------|-------------|------|
| dolichyl-di-phosphooligosaccharide-protein glycotransferase (oligosaccharyltransferase)-like ;supported by full-length cDNA: Ceres:18419.         | 247058_at   | -0.5 |
| porin-like protein ;supported by full-length cDNA: Ceres:12964.                                                                                   | 247007_at   | -0.5 |
| putative protein predicted protein, Arabidopsis thaliana                                                                                          | 246895_at   | -0.5 |
| putative protein ; supported by cDNA: gi_14532675_gb_AY039962.1_                                                                                  | 246749_at   | -0.5 |
| cysteine synthase ;supported by full-length cDNA: Ceres:154690.                                                                                   | 246701_at   | -0.5 |
| 5-enolpyruvylshikimate-3-phosphate (EPSP) synthase, putative similar to 5-enolpyruvylshikimate-3-phosphate (EPSP) synthase GI:2583124 from        | 246627_s_at | -0.5 |
| seed maturation -like protein seed maturation protein PM23, Glycine max., EMBL:AF116752;supported by full-length cDNA: Ceres:106301.              | 246547_at   | -0.5 |
| plant adhesion molecule 1 (PAM1) ;supported by full-length cDNA: Ceres:39585.                                                                     | 246482_at   | -0.5 |
| putative protein putative N-acetyltransferase F13E7.7 - Arabidopsis thaliana, EMBL:AC018363                                                       | 246448_at   | -0.5 |
| thiol-disulfide interchange like protein                                                                                                          | 246226_at   | -0.5 |
| putative protein                                                                                                                                  | 246237_at   | -0.5 |
| putative protein predicted protein - Oryza sativa - TREMBL:AP001072_3;supported by full-length cDNA: Ceres:3689.                                  | 246026_at   | -0.5 |
| putative protein ;supported by full-length cDNA: Ceres:120101.                                                                                    | 245948_at   | -0.5 |
| tubulin alpha-5 chain-like protein tubulin alpha-5 chain - Arabidopsis thaliana, EMBL:M84698; supported by cDNA: gi_13605804_gb_AF367301.         | 245915_s_at | -0.5 |
| unknown protein contains similarity to obtusifoliol 14-alpha-demethylase (CYP51) GB:Y09292 GI:1707854 from [Triticum aestivum];supported by       | 245795_at   | -0.5 |
| phenylalanine ammonia-lyase PAL3                                                                                                                  | 245690_at   | -0.5 |
| hypothetical protein                                                                                                                              | 245414_at   | -0.5 |
| hypothetical protein ; supported by full-length cDNA: Ceres: 12451.                                                                               | 245368_at   | -0.5 |
| glucosyltransferase like protein ; supported by cDNA: gi_2149126_gb_U81293.1_ATU81293                                                             | 245277_at   | -0.5 |
| hydroperoxide lyase (HPOL) like protein ; supported by cDNA: gi_3822402_gb_AF087932.1_AF087932                                                    | 245253_at   | -0.5 |
| kinase like protein ; supported by cDNA: gi_13430671_gb_AF360248.1_AF360248                                                                       | 245260_at   | -0.5 |
| Expressed protein ; supported by cDNA: gi_15809953_gb_AY054245.1_                                                                                 | 245264_at   | -0.5 |
| Expressed protein non-consensus GG donor splice site at exon 1 and 6; CT acceptor splice site at exon 2; supported by cDNA: gi:13605660           | 245216_at   | -0.5 |
| chlorophyll a oxygenase identical to chlorophyll a oxygenase GI:5853117 from [Arabidopsis thaliana]; supported by cDNA: gi_5478806_dbj_AB02       | 245242_at   | -0.5 |
| RNA polymerase beta subunit-1                                                                                                                     | 244998_at   | -0.5 |
| PSII D2 protein                                                                                                                                   | 245002_at   | -0.5 |
| ribosomal protein S11                                                                                                                             | 244979_at   | -0.5 |
| putative antifungal protein                                                                                                                       | 257365_x_at | -0.5 |
| putative hydroxymethyltransferase similar to serine hydroxymethyltransferase GB:P50433 from [Solanum tuberosum];supported by full-length cDI      | 260126_at   | -0.5 |
| putative small GTP-binding protein contains an ATP/GTP-binding site motif A (P-loop); contains an ADP-ribosylation factors family signature for p | 266885_at   | -0.5 |
| unknown protein                                                                                                                                   | 265720_at   | -0.5 |
| unknown protein ;supported by full-length cDNA: Ceres:123128.                                                                                     | 265446_at   | -0.5 |
| auxilin-like protein similar to GB:CAB40994 from [Arabidopsis thaliana], EST gb AA042488 comes from this gene                                     | 262493_at   | -0.5 |
| unknown protein ; supported by cDNA: gi_15982794_gb_AY057504.1_                                                                                   | 259927_at   | -0.5 |
| 3-hydroxyisobutyryl-coenzyme A hydrolase - like protein 3-hydroxyisobutyryl-coenzyme A hydrolase, Homo sapiens, U66669;supported by full-le       | 254776_at   | -0.5 |
| putative protein cellulose synthase, Agrobacterium tumefaciens, PIR2:I39714                                                                       | 253533_at   | -0.5 |
| avirulence induced gene (AIG) - like protein AIG2 PROTEIN, Arabidopsis thaliana, SWISSPROT:AIG2_ARATH; supported by cDNA: gi_143349:              | 249441_at   | -0.5 |
| homeotic protein BEL1 homolog ; supported by cDNA: gi_15146192_gb_AY049237.1_                                                                     | 249309_at   | -0.5 |
| serine threonine protein kinase ; supported by cDNA: gi_14486383_gb_AY035225.1_                                                                   | 248910_at   | -0.5 |

**Table 6: Transcripts suppressed during drought stress compared to unstressed plants**

|                                                                                                                                                                                                              | <b>Affimetrix<br/>number</b> | <b>log<sub>2</sub> fold<br/>suppressed</b> |
|--------------------------------------------------------------------------------------------------------------------------------------------------------------------------------------------------------------|------------------------------|--------------------------------------------|
| putative protein basic leucine zipper transcription activator shoot-forming PKSF1 - <i>Paulownia kawakamii</i> , EMBL:AF046934;supported by full-length cDNA: Ceres:28033.                                   | 251575_at                    | -7.3                                       |
| glycine-rich RNA-binding protein, putative similar to glycine-rich RNA-binding protein Gl:17818 from [ <i>Brassica napus</i> ]                                                                               | 255962_at                    | -7                                         |
| putative antifungal protein                                                                                                                                                                                  | 257365_x_at                  | -6.8                                       |
| Unknown protein ; supported by full-length cDNA: Ceres:28033.                                                                                                                                                | 264898_at                    | -5.9                                       |
| unknown protein ;supported by full-length cDNA: Ceres:102453.                                                                                                                                                | 263981_at                    | -5.7                                       |
| GAST1-like protein similar to GAST1 protein precursor GB:P27057 [ <i>Lycopersicon esculentum</i> ] (induced by gibberellins, inhibited by ABA PI pEARL1 1 ; supported by cDNA: gi_871779_gb_L43080.1_ATHPEAR | 260221_at                    | -5.7                                       |
| putative expansin ;supported by full-length cDNA: Ceres:27553.                                                                                                                                               | 254805_at                    | -5.7                                       |
| ethylene response factor, putative similar to ethylene response factor 1 GB:AAD03544 Gl:4128208 from [ <i>Arabidopsis thaliana</i> ]                                                                         | 255822_at                    | -5.6                                       |
| ethylene-responsive element - like protein ethylene-responsive element binding protein homolog, <i>Stylosanthes hamata</i> , EMBL:U91857; supported by full-length cDNA: Ceres:27553.                        | 260783_at                    | -5.3                                       |
| unknown protein                                                                                                                                                                                              | 246932_at                    | -5.3                                       |
| vegetative storage protein-like ;supported by full-length cDNA: Ceres:27372.                                                                                                                                 | 258100_at                    | -5.2                                       |
| hypothetical protein predicted by genefinder                                                                                                                                                                 | 249073_at                    | -4.9                                       |
| unknown protein ;supported by full-length cDNA: Ceres:9435.                                                                                                                                                  | 266800_at                    | -4.6                                       |
| putative auxin-induced protein similar to SAUR GB:BAA25434 [ <i>Raphanus sativus</i> ]                                                                                                                       | 262947_at                    | -4.6                                       |
| unknown protein                                                                                                                                                                                              | 259331_at                    | -4.6                                       |
| putative auxin-regulated protein                                                                                                                                                                             | 258897_at                    | -4.6                                       |
| Expressed protein ; supported by full-length cDNA: Ceres: 41224.                                                                                                                                             | 264016_at                    | -4.6                                       |
| thionin Thi2.2 ;supported by full-length cDNA: Ceres:1523.                                                                                                                                                   | 255969_at                    | -4.4                                       |
| unknown protein ; supported by full-length cDNA: Ceres:32647.                                                                                                                                                | 249645_at                    | -4.4                                       |
| hevein-like protein precursor (PR-4) identical to hevein-like protein precursor GB:P43082 [ <i>Arabidopsis thaliana</i> ], similar to wound-induced protein                                                  | 265400_at                    | -4.3                                       |
| putative auxin-induced protein auxin-induced protein 10A, Glycine max., PIR2:JQ1099                                                                                                                          | 258791_at                    | -4.3                                       |
| putative protein auxin-induced protein 6B, mung bean, PIR:T10942                                                                                                                                             | 252965_at                    | -4.3                                       |
| proline-rich protein other proline-rich proteins                                                                                                                                                             | 251977_at                    | -4.3                                       |
| germin-like protein ; supported by cDNA: gi_14517363_gb_AY039516.1_                                                                                                                                          | 246519_at                    | -4.3                                       |
| xyloglucan endo-transglycosylase-like protein ;supported by full-length cDNA: Ceres:12301.                                                                                                                   | 246004_at                    | -4.3                                       |
| unknown protein                                                                                                                                                                                              | 247162_at                    | -4.2                                       |
| unknown protein predicted by gensecan+;supported by full-length cDNA: Ceres:153279.                                                                                                                          | 248963_at                    | -4.2                                       |
| putative protein farnesylated protein GMFP5, Glycine max, EMBL:U64916                                                                                                                                        | 258468_at                    | -4.1                                       |
| response regulator 6 (ARR6) ; supported by cDNA: gi_3953600_dbj_AB008489.1_AB008489                                                                                                                          | 247594_at                    | -4.1                                       |
| myosinase-associated protein, putative similar to myosinase-associated protein Gl:1769969 from [ <i>Brassica napus</i> ];supported by full-length cDNA: Ceres:153279.                                        | 247406_at                    | -4.1                                       |
| putative protein similar to transcriptional regulator                                                                                                                                                        | 263153_s_at                  | -4                                         |
| peroxidase ATP19a                                                                                                                                                                                            | 255298_at                    | -4                                         |
| antifungal protein-like (PDF1.2)                                                                                                                                                                             | 254914_at                    | -4                                         |
| unknown protein ; supported by cDNA: gi_15529233_gb_AY052241.1_                                                                                                                                              | 249052_at                    | -4                                         |
| thionin, putative similar to thionin [ <i>Arabidopsis thaliana</i> ] Gl:1181533; supported by cDNA: gi_14190504_gb_AF380652.1_AF380652                                                                       | 258225_at                    | -3.9                                       |
| expansin (At-EXP1) identical to expansin (At-EXP1) [ <i>Arabidopsis thaliana</i> ] Gl:1041702;supported by full-length cDNA: Ceres:255048.                                                                   | 256527_at                    | -3.9                                       |
| putative protein similar to unknown protein (pir S72530);supported by full-length cDNA: Ceres:32925.                                                                                                         | 256299_at                    | -3.9                                       |
| polynuridine aldehyde esterase-like; also similar to alpha-hydroxynitrile lyase ;supported by full-length cDNA: Ceres:123228.                                                                                | 248683_at                    | -3.9                                       |
| conglutin gamma - like protein conglutin gamma precursor, <i>Lupinus angustifolius</i> , PIR:S21426; supported by cDNA: gi_15010797_gb_AY0-                                                                  | 247814_at                    | -3.9                                       |
| putative protein similar to unknown protein (pir T05055)                                                                                                                                                     | 249923_at                    | -3.8                                       |
| Expressed protein ; supported by full-length cDNA: Ceres: 7152.                                                                                                                                              | 248047_at                    | -3.8                                       |
| delta tonoplast integral protein (delta-TIP) identical to delta tonoplast integral protein (delta-TIP) GB:U39485 [ <i>Arabidopsis thaliana</i> ] (Plant C                                                    | 266658_at                    | -3.7                                       |
| myb-related protein similar to Gl:7981380 from [ <i>Lycopersicon esculentum</i> ]                                                                                                                            | 258054_at                    | -3.7                                       |
| putative polygalacturonase polygalacturonase (EC 3.2.1.15) - avocado, EMBL:X66426                                                                                                                            | 256503_at                    | -3.7                                       |
| putative protein predicted proteins, <i>Arabidopsis thaliana</i>                                                                                                                                             | 254221_at                    | -3.7                                       |
| DC1.2 homologue - like protein DC1.2 homologue, <i>Nicotiana tabacum</i> , EMBL:AB009888                                                                                                                     | 247474_at                    | -3.7                                       |
| hypothetical protein ;supported by full-length cDNA: Ceres:38891.                                                                                                                                            | 247478_at                    | -3.7                                       |
| putative copper/zinc superoxide dismutase identical to GP:3273753:AF061519;supported by full-length cDNA: Ceres:39796.                                                                                       | 266805_at                    | -3.6                                       |
| hypothetical protein predicted by genefinder;supported by full-length cDNA: Ceres:271253.                                                                                                                    | 266165_at                    | -3.6                                       |
| putative gibberellin-regulated protein contains similarity to gibberellin-regulated protein 2 precursor (GAST1) homolog gb U11765 from A. th                                                                 | 265067_at                    | -3.6                                       |
|                                                                                                                                                                                                              | 264195_at                    | -3.6                                       |

|                                                                                                                                              |             |      |
|----------------------------------------------------------------------------------------------------------------------------------------------|-------------|------|
| putative protein ;supported by full-length cDNA: Ceres:1336.                                                                                 | 250968_at   | -3.6 |
| unknown protein                                                                                                                              | 263549_at   | -3.5 |
| unknown protein ; supported by full-length cDNA: Ceres: 38378.                                                                               | 259664_at   | -3.5 |
| putative pectinesterase contains similarity to pectinesterase GB:AAB57671 [Citrus sinensis]                                                  | 258764_at   | -3.5 |
| putative heat shock transcription factor heat shock transcription factor HSF30 - Peruvian tomato, PIR2:S25480                                | 252081_at   | -3.5 |
| putative protein putative DNA-binding protein - Arabidopsis thaliana, EMBL:AC011765;supported by full-length cDNA: Ceres:4734.               | 249383_at   | -3.5 |
| putative protein predicted proteins from various species, Human, yeast, Oryctolagus sp.                                                      | 247621_at   | -3.5 |
| auxin-induced protein, putative similar to SP:P33083 from [Glycine max];supported by full-length cDNA: Ceres:29931.                          | 259784_at   | -3.4 |
| putative protein MEL-26, Caenorhabditis elegans, U67737; supported by cDNA: gi_14532781_gb_AY040015.1_                                       | 252367_at   | -3.4 |
| putative protein ;supported by full-length cDNA: Ceres:16131.                                                                                | 246200_at   | -3.4 |
| putative expansin                                                                                                                            | 267158_at   | -3.3 |
| putative endoxyloglucan glycosyltransferase identical to GB:D16454;supported by full-length cDNA: Ceres:15276.                               | 266215_at   | -3.3 |
| unknown protein location of ESTs est VBVB05, gb Z30807 and VBVB05 , gb Z30808;supported by full-length cDNA: Ceres:39763.                    | 265066_at   | -3.3 |
| hypothetical protein predicted by genscan;supported by full-length cDNA: Ceres:6295.                                                         | 264672_at   | -3.3 |
| glutaredoxin, putative similar to glutaredoxin GB:CAA89699 GI:1732424 from [Ricin communis];supported by full-length cDNA: Ceres:12!         | 260831_at   | -3.3 |
| putative helix-loop-helix DNA-binding protein contains Pfam profile: PF00010 Helix-loop-helix DNA-binding domain                             | 260070_at   | -3.3 |
| putative lectin similar to lectin SP:P02874 [Onobrychis viciifolia]; contains Pfam profile: PF00139 legume lectins beta domain; supported by | 257206_at   | -3.3 |
| Expressed protein ; supported by cDNA: gi_14190492_gb_AF380646.1_AF380646                                                                    | 253423_at   | -3.3 |
| unknown protein ;supported by full-length cDNA: Ceres:32244.                                                                                 | 267034_at   | -3.2 |
| expansin AtEx6 identical to GB U30480; supported by full-length cDNA: Ceres: 17914.                                                          | 266790_at   | -3.2 |
| putative pectate lyase similar to pectate lyase 2 GB:AAF19196 [Musa acuminata]; supported by full-length cDNA: Ceres: 124816.                | 258552_at   | -3.2 |
| Expressed protein ; supported by full-length cDNA: Ceres: 42850.                                                                             | 254609_at   | -3.2 |
| putative protein hypersensitivity-related hsr201 protein - Nicotiana tabacum,PIR2:T03274                                                     | 252317_at   | -3.2 |
| cotton fiber expressed protein 1-like protein                                                                                                | 248205_at   | -3.2 |
| glutaredoxin homolog                                                                                                                         | 245506_at   | -3.2 |
| auxin-induced protein, putative similar to SP:P33083 from [Glycine max];supported by full-length cDNA: Ceres:9311.                           | 259783_at   | -3.1 |
| unknown protein very similar to unknown protein GB:AAC39468 from [Arabidopsis thaliana]; supported by cDNA: gi_14335087_gb_AY0372            | 258402_at   | -3.1 |
| receptor-like protein kinase receptor like protein kinase LRK1 - Arabidopsis thaliana,EMBL:ATLECGENE                                         | 252596_at   | -3.1 |
| response reactor 2 (ATRR2) ; supported by cDNA: gi_3273197_dbj_AB010916.1_AB010916                                                           | 252374_at   | -3.1 |
| putative serine rich protein predicted proteins, Arabidopsis thaliana;supported by full-length cDNA: Ceres:36958.                            | 250327_at   | -3.1 |
| auxin-induced protein-like                                                                                                                   | 250012_x_at | -3.1 |
| unknown protein ; supported by cDNA: gi_14190416_gb_AF378886.1_AF378886                                                                      | 249894_at   | -3.1 |
| Expressed protein ; supported by full-length cDNA: Ceres: 15527.                                                                             | 248509_at   | -3.1 |
| putative protein                                                                                                                             | 247754_at   | -3.1 |
| unknown protein similar to cell wall-plasma membrane linker protein GB:CAA64425 from [Brassica napus]                                        | 256825_at   | -3   |
| putative auxin-regulated protein auxin-induced protein X15, Glycine max, PIR2:JQ1097;supported by full-length cDNA: Ceres:10510.             | 253255_at   | -3   |
| 1-aminocyclopropane-1-carboxylate synthase - like protein 1-aminocyclopropane-1-carboxylate synthase,Arabidopsis thaliana, S71174; si        | 253066_at   | -3   |
| endo-xyloglucan transferase - like protein endo-xyloglucan transferase, Gossypium hirsutum, D88413;supported by full-length cDNA: Ceres      | 253040_at   | -3   |
| superoxidase dismutase identical to GB:P24704;supported by full-length cDNA: Ceres:33493.                                                    | 264809_at   | -2.9 |
| unknown protein contains helix-loop-helix DNA binding motif                                                                                  | 259010_at   | -2.9 |
| unknown protein                                                                                                                              | 258419_at   | -2.9 |
| putative protein similar to unknown protein (gb AAF63814.1);supported by full-length cDNA: Ceres:40718.                                      | 248623_at   | -2.9 |
| lsp4-like protein ; supported by full-length cDNA: Ceres: 3109.                                                                              | 247284_at   | -2.9 |
| unknown protein                                                                                                                              | 245866_s_at | -2.9 |
| Expressed protein ; supported by full-length cDNA: Ceres: 102374.                                                                            | 262290_at   | -2.8 |
| peptide transporter, putative similar to peptide transporter PTR2-B SP:P46032 [Arabidopsis thaliana (Mouse-ear cress)]; supported by full-l  | 259839_at   | -2.8 |
| auxin-induced protein, putative similar to SP:P33083 from [Glycine max];supported by full-length cDNA: Ceres:147801.                         | 259787_at   | -2.8 |
| small auxin up RNA (SAUR-AC1) ;supported by full-length cDNA: Ceres:14973.                                                                   | 252970_at   | -2.8 |
| prolin-rich protein, putative similar to prolin-rich protein GI:21045 from [Phaseolus vulgaris]                                              | 245688_at   | -2.8 |
| hypothetical protein similar to putative purple acid phosphatase precursor GI:7331195 from [Glycine max]                                     | 245637_at   | -2.8 |
| unknown protein ; supported by cDNA: gi_15294169_gb_AF410276.1_AF410276                                                                      | 266552_at   | -2.7 |
| unknown protein                                                                                                                              | 265327_at   | -2.7 |
| hypothetical protein similar to putative MADS-box protein GI:4580382 from [Arabidopsis thaliana]                                             | 262902_x_at | -2.7 |



|                                                                                                                                            |             |      |
|--------------------------------------------------------------------------------------------------------------------------------------------|-------------|------|
| lipase/hydrolase, putative contains Pfam profile: PF00657 Lipase/Acylhydrolase with GDLS-like motif;supported by full-length cDNA: Ceres   | 259786_at   | -2.7 |
| putative protein CGI-131 protein, Homo sapiens, AF151889;supported by full-length cDNA: Ceres:24573.                                       | 254387_at   | -2.7 |
| putative protein small auxin up-regulated RNA, Malus domestica, gb:Z93766                                                                  | 253207_at   | -2.7 |
| putative protein similar to unknown protein (gb AAF04428.1);supported by full-length cDNA: Ceres:27668.                                    | 248028_at   | -2.7 |
| putative protein similar to unknown protein (emb CAB62102.1);supported by full-length cDNA: Ceres:40250.                                   | 246996_at   | -2.7 |
| Expressed protein ; supported by full-length cDNA: Ceres: 30087.                                                                           | 245318_at   | -2.7 |
| dynein light chain, putative similar to dynein light chain 1, cytoplasmic SP:Q15701 [Homo sapiens]                                         | 257504_at   | -2.7 |
| putative PREG1-like negative regulator                                                                                                     | 266873_at   | -2.6 |
| unknown protein ; supported by cDNA: gi_14326466_gb_AF385686.1_AF385686                                                                    | 266460_at   | -2.6 |
| unknown protein ; supported by full-length cDNA: Ceres: 29227.                                                                             | 265116_at   | -2.6 |
| putative DNA-binding protein (RAV2-like) identical to residues 34-352 of RAV2 GB:BAA34251 (Arabidopsis thaliana);supported by full-length  | 260037_at   | -2.6 |
| plasma membrane intrinsic protein 1c, putative similar to plasma membrane intrinsic protein 1c GI:472875 from [Arabidopsis thaliana]       | 259431_at   | -2.6 |
| acyl carrier - like protein acyl carrier protein, Cuphea lanceolata, PIR2:S42026;supported by full-length cDNA: Ceres:11559.               | 254102_at   | -2.6 |
| putative protein auxin-regulated gene, Vigna radiata                                                                                       | 253253_at   | -2.6 |
| putative protein many predicted proteins, Arabidopsis thaliana; supported by cDNA: gi_15983504_gb_AF424627.1_AF424627                      | 250110_at   | -2.6 |
| putative protein similar to unknown protein (pir T00970); supported by cDNA: gi_15215722_gb_AY050390.1_                                    | 249817_at   | -2.6 |
| Expressed protein ; supported by full-length cDNA: Ceres: 36971.                                                                           | 248460_at   | -2.6 |
| putative protein auxin-induced basic helix-loop-helix transcription factor, Gossypium hirsutum, EMBL:AF165924; supported by cDNA: gi_15    | 246011_at   | -2.6 |
| hypothetical protein predicted by genscan                                                                                                  | 266070_at   | -2.5 |
| putative aquaporin (tonoplast intrinsic protein gamma) ;supported by full-length cDNA: Ceres:36633.                                        | 263867_at   | -2.5 |
| histone H2A ; supported by full-length cDNA: Ceres: 8.                                                                                     | 263264_at   | -2.5 |
| unknown protein similar to hypothetical protein GB:AAF27090 GI:6730669 from (Arabidopsis thaliana);supported by full-length cDNA: Ceres    | 262986_at   | -2.5 |
| hypothetical protein predicted by genemark.hmm                                                                                             | 261684_at   | -2.5 |
| chalcone isomerase, putative similar to GI:4126399 from (Citrus sinensis);supported by full-length cDNA: Ceres:116131.                     | 260982_at   | -2.5 |
| auxin-induced protein, putative similar to SP:P33083 from [Glycine max].                                                                   | 259790_s_at | -2.5 |
| leucine rich repeat protein, putative contains multiple LRR repeats Pfam profile: PF00560; supported by full-length cDNA: Ceres: 29675.    | 256237_at   | -2.5 |
| Expressed protein ; supported by full-length cDNA: Ceres: 38416.                                                                           | 253305_at   | -2.5 |
| cytochrome P450 monooxygenase - like protein cytochrome P450 monooxygenase CYP91A2, Arabidopsis thaliana, D78607;supported by              | 253073_at   | -2.5 |
| putative protein hypothetical protein - Arabidopsis thaliana, EMBL:CAB38293;supported by full-length cDNA: Ceres:17840.                    | 252220_at   | -2.5 |
| Expressed protein ; supported by full-length cDNA: Ceres: 32396.                                                                           | 251142_at   | -2.5 |
| hypothetical protein predicted by graal                                                                                                    | 266676_s_at | -2.4 |
| hypothetical protein predicted by genemark.hmm;supported by full-length cDNA: Ceres:24933.                                                 | 260744_at   | -2.4 |
| unknown protein contains two Kelch motifs; supported by full-length cDNA: Ceres: 32885.                                                    | 260287_at   | -2.4 |
| putative GDLS-motif lipase/acylhydrolase contains Pfam profile: lipase/acylhydrolase with GDLS-like motif;supported by full-length cDNA: C | 258589_at   | -2.4 |
| unknown protein ; supported by cDNA: gi_14532647_gb_AY039948.1_                                                                            | 258535_at   | -2.4 |
| early auxin-induced protein, IAA19 identical to IAA19 GB:AAB84356 from [Arabidopsis thaliana]; supported by full-length cDNA: Ceres: 942   | 258399_at   | -2.4 |
| putative cytochrome c oxidase subunit Vb similar to cytochrome oxidase IV GB:223590 [Bos taurus]; contains Pfam profile: PF01215 cytoch    | 258274_at   | -2.4 |
| unknown protein ; supported by cDNA: gi_15451205_gb_AY054683.1_                                                                            | 258156_at   | -2.4 |
| unknown protein contains similarity to 3-methyladenine-DNA glycosidase I GB:P05100 from [Escherichia coli];supported by full-length cDNA   | 257701_at   | -2.4 |
| hypothetical protein contains similarity to MIN3(nodulin) protein GB:Y08726 GI:1619601 from [Medicago truncatula]; supported by cDNA: gi_  | 256548_at   | -2.4 |
| unknown protein identical to unknown protein GI:9755444 from (Arabidopsis thaliana); supported by full-length cDNA: Ceres: 110066.         | 255856_at   | -2.4 |
| pEARLI 1-like protein Arabidopsis thaliana pEARLI 1 mRNA, PID:g871780; supported by cDNA: gi_15450470_gb_AY052336.1_                       | 254832_at   | -2.4 |
| putative protein hypothetical protein - Arabidopsis thaliana,PIR2:H71441;supported by full-length cDNA: Ceres:4642.                        | 254746_at   | -2.4 |
| protein phosphatase - like protein protein phosphatase 2C homolog, Mesembryanthemum crystallinum, EMBL:AF097667                            | 251017_at   | -2.4 |
| putative protein microtubule-associated protein homolog, Drosophila melanogaster, EMBL:T13564                                              | 249378_at   | -2.4 |
| glutaredoxin                                                                                                                               | 245505_at   | -2.4 |
| homeobox-leucine zipper protein HAT1 (hd-zip protein 1) ;supported by full-length cDNA: Ceres:34167.                                       | 245362_at   | -2.4 |
| auxin-induced protein, putative similar to SP:P33083 from [Glycine max]                                                                    | 257506_at   | -2.4 |
| unknown protein ;supported by full-length cDNA: Ceres:125631.                                                                              | 267209_at   | -2.3 |
| unknown protein Similar to acid phosphatase; Location of ESTs 110C2T7 , gb T42036, and 110C2XP, gb AI100245; supported by cDNA: g          | 265042_at   | -2.3 |
| hypothetical protein predicted by genemark.hmm                                                                                             | 263126_at   | -2.3 |
| helix-loop-helix protein homolog, putative similar to helix-loop-helix protein homolog GB:BAA87957 GI:6520231 from [Arabidopsis thaliana]  | 261717_at   | -2.3 |
| protein kinase, putative contains similarity to many predicted protein kinases; supported by cDNA: gi_13430527_gb_AF360176.1_AF36017       | 261308_at   | -2.3 |

|                                                                                                                                            |             |      |
|--------------------------------------------------------------------------------------------------------------------------------------------|-------------|------|
| hypothetical protein predicted by genemark.hmm                                                                                             | 261247_at   | -2.3 |
| unknown protein ; supported by full-length cDNA: Ceres: 100293.                                                                            | 260877_at   | -2.3 |
| unknown protein contains Pfam profile: PF00561 alpha/beta hydrolase fold                                                                   | 260297_at   | -2.3 |
| auxin-induced protein, putative similar to SP:P33083 from [Glycine max]                                                                    | 259773_at   | -2.3 |
| hypothetical protein similar to GB:AAB97719 from [Arabidopsis thaliana]                                                                    | 258409_at   | -2.3 |
| unknown protein ;supported by full-length cDNA: Ceres:35273.                                                                               | 255817_at   | -2.3 |
| putative protein                                                                                                                           | 255652_at   | -2.3 |
| heat shock protein - like heat shock protein 17, Triticum aestivum, PIR1:HHWT17;supported by full-length cDNA: Ceres:23223.                | 254384_at   | -2.3 |
| cytochrome P450 monooxygenase-like protein cytochrome P450 monooxygenase - Arabidopsis thaliana, EMBL:D78600                               | 251350_at   | -2.3 |
| PGPD14 protein ;supported by full-length cDNA: Ceres:41666.                                                                                | 249862_at   | -2.3 |
| unknown protein ;supported by full-length cDNA: Ceres:141953.                                                                              | 249750_at   | -2.3 |
| xylosidase                                                                                                                                 | 248622_at   | -2.3 |
| thioredoxin-like 3 ; supported by cDNA: gi_4973259_gb_AF144389.1_AF144389                                                                  | 247524_at   | -2.3 |
| putative protein similar to unknown protein (emb CAB61744.1); supported by full-length cDNA: Ceres: 31648.                                 | 247214_at   | -2.3 |
| glutaredoxin                                                                                                                               | 245504_at   | -2.3 |
| 3-hydroxyisobutyryl-coenzyme A hydrolase                                                                                                   | 267572_at   | -2.2 |
| putative auxin transport protein ; supported by cDNA: gi_7109714_gb_AF087016.1_AF087016                                                    | 266300_at   | -2.2 |
| predicted by genscan and genefinder ;supported by full-length cDNA: Ceres:120459.                                                          | 265732_at   | -2.2 |
| putative nonspecific lipid-transfer protein precursor ; supported by full-length cDNA: Ceres: 24286.                                       | 265656_at   | -2.2 |
| unknown protein ;supported by full-length cDNA: Ceres:34827.                                                                               | 265387_at   | -2.2 |
| nodulin-like protein                                                                                                                       | 265414_at   | -2.2 |
| unknown protein ; supported by full-length cDNA: Ceres: 5171.                                                                              | 264343_at   | -2.2 |
| Expressed protein ; supported by full-length cDNA: Ceres: 27081.                                                                           | 263182_at   | -2.2 |
| unknown protein similar to pectinesterase GB:X85216 GI:732912 [Phaseolus vulgaris];supported by full-length cDNA: Ceres:33355.             | 262844_at   | -2.2 |
| acid phosphatase, putative similar to acid phosphatase GI:5360721 from [Lupinus albus]; supported by cDNA: gi_13605749_gb_AF361856         | 261492_at   | -2.2 |
| putative elicitor-responsive gene similar to elicitor-responsive gene-3 GB:AAC35866 from [Oryza sativa];supported by full-length cDNA: Cen | 260083_at   | -2.2 |
| thaumatin-like protein (PR-5) similar to thaumatin GB:AAD55090 [Vitis riparia]; contains Pfam profile: PF00314 Thaumatin family; supported | 259987_at   | -2.2 |
| Expressed protein ; supported by full-length cDNA: Ceres: 31015.                                                                           | 259479_at   | -2.2 |
| cytochrome P450, putative contains Pfam profile: PF00067 cytochrome P450; supported by cDNA: gi_13430717_gb_AF360271.1_AF3602              | 257636_at   | -2.2 |
| gamma tonoplast intrinsic protein nearly identical to gamma tonoplast intrinsic protein 2 (TIP2) GB:AF057137 [Arabidopsis thaliana]; suppo | 257313_at   | -2.2 |
| putative protein                                                                                                                           | 255662_at   | -2.2 |
| water channel - like protein plasma membrane intrinsic protein 1c, Arabidopsis thaliana, PIR2:S44083;supported by full-length cDNA: Ceres: | 254239_at   | -2.2 |
| putative pectate lyase pectate lyase, Musa acuminata, PATX:E209876;supported by full-length cDNA: Ceres:36681.                             | 254119_at   | -2.2 |
| putative protein SPOP, Homo sapiens, AJ000644;supported by full-length cDNA: Ceres:122670.                                                 | 253061_at   | -2.2 |
| putative protein contains similarity to DNA-3-methyladenine glycosylase I;supported by full-length cDNA: Ceres:29551.                      | 249008_at   | -2.2 |
| GDSL-motif lipase/hydrolase-like protein ;supported by full-length cDNA: Ceres:18389.                                                      | 248912_at   | -2.2 |
| blue copper binding protein ;supported by full-length cDNA: Ceres:7767.                                                                    | 246099_at   | -2.2 |
| Expressed protein ; supported by full-length cDNA: Ceres: 7600.                                                                            | 266500_at   | -2.1 |
| unknown protein ; supported by cDNA: gi_15450380_gb_AY052291.1_                                                                            | 266316_at   | -2.1 |
| putative microtubule-associated protein ; supported by cDNA: gi_15724331_gb_AF412106.1_AF412106                                            | 266106_at   | -2.1 |
| unknown protein Location of EST gb T41885 and gb AA395021                                                                                  | 264521_at   | -2.1 |
| hypothetical protein predicted by grai                                                                                                     | 264379_at   | -2.1 |
| unknown protein                                                                                                                            | 262832_s_at | -2.1 |
| hypothetical protein predicted by genemark.hmm;supported by full-length cDNA: Ceres:157.                                                   | 260804_at   | -2.1 |
| sucrose transport protein SUC1 identical to GB:S38197 from [Arabidopsis thaliana]; supported by cDNA: gi_15146267_gb_AY049275.1_           | 260143_at   | -2.1 |
| AP2-containing DNA-binding protein contains Pfam profile: PF00847 AP2 domain                                                               | 259793_at   | -2.1 |
| putative auxin-induced protein similar to SAUR GB:BAA25434 [Raphanus sativus]                                                              | 259332_at   | -2.1 |
| putative protein kinase similar to ATMRK1, an Arabidopsis protein kinase related to mammal mixed-lineage kinases and Raf protein kinase:   | 259163_at   | -2.1 |
| rhodanese-like family protein contains rhodanese-like domain PF:00581;supported by full-length cDNA: Ceres:30880.                          | 258989_at   | -2.1 |
| hypothetical protein predicted by genscan+;supported by full-length cDNA: Ceres:4146.                                                      | 256796_at   | -2.1 |
| Proline-rich APG - like protein proline-rich protein APG, Arabidopsis thaliana, PIR2:S21961;supported by full-length cDNA: Ceres:324.      | 253736_at   | -2.1 |
| putative protein similar to unknown protein (pir T02514);supported by full-length cDNA: Ceres:117347.                                      | 250777_at   | -2.1 |
| putative protein similar to unknown protein (gb AAD10689.1); supported by cDNA: gi_14334449_gb_AY034916.1_                                 | 249065_at   | -2.1 |

|                                                                                                                                               |             |      |
|-----------------------------------------------------------------------------------------------------------------------------------------------|-------------|------|
| unknown protein ;supported by full-length cDNA: Ceres:116332.                                                                                 | 248646_at   | -2.1 |
| integral membrane protein-like                                                                                                                | 248392_at   | -2.1 |
| unknown protein ;supported by full-length cDNA: Ceres:148254.                                                                                 | 248282_at   | -2.1 |
| putative protein predicted protein, Arabidopsis thaliana                                                                                      | 247715_at   | -2.1 |
| putative protein similar to unknown protein (gb AAF67766.1);supported by full-length cDNA: Ceres:512.                                         | 246997_at   | -2.1 |
| hypothetical protein similar to hypothetical protein GB:AA26673                                                                               | 263293_x_at | -2.1 |
| putative proline-rich protein ; supported by full-length cDNA: Ceres: 28853.                                                                  | 267260_at   | -2   |
| unknown protein ; supported by cDNA: gi_15724183_gb_AF411794.1_AF411794                                                                       | 263799_at   | -2   |
| class 1 non-symbiotic hemoglobin (AHB1) identical to GP:2581783:U94998;supported by full-length cDNA: Ceres:18195.                            | 263096_at   | -2   |
| hypothetical protein predicted be genemark.hmm                                                                                                | 262336_at   | -2   |
| invertase, putative similar to neutral invertase GB:76145 GI:4200165 from [Daucus carota]                                                     | 262038_at   | -2   |
| auxin-induced protein IAA5, putative similar to auxin-induced protein IAA5 GI:972913 from [Arabidopsis thaliana]                              | 261766_at   | -2   |
| expansin S2 precursor, putative similar to GB:U30460 from [Cucumis sativus];supported by full-length cDNA: Ceres:11011.                       | 261226_at   | -2   |
| germin-like protein similar to germin precursor GB:P26759 [Triticum aestivum]; contains Pfam profile: PF01072 Germin family;supported by      | 259892_at   | -2   |
| putative calmodulin similar to calmodulin GB:P04352 [Chlamydomonas reinhardtii]; contains Pfam profile: PF00036 EF hand (4 copies); sup       | 258617_at   | -2   |
| unknown protein contains Pfam profile:PF00295 Polygalacturonase;supported by full-length cDNA: Ceres:38575.                                   | 258528_at   | -2   |
| hypothetical protein                                                                                                                          | 258262_at   | -2   |
| putative zinc finger protein contains Pfam profile: PF00641 Zn-finger in Ran binding protein and others;supported by full-length cDNA: Ceres: | 258222_at   | -2   |
| unknown protein                                                                                                                               | 256633_at   | -2   |
| putative protein similar to T5J8.18                                                                                                           | 255450_at   | -2   |
| pEARLI 1-like protein Arabidopsis thaliana pEARLI 1 mRNA, PID:g871780                                                                         | 254818_at   | -2   |
| putative pollen surface protein endosperm specific protein - Zea mays, PID:g2104712;supported by full-length cDNA: Ceres:4620.                | 254785_at   | -2   |
| calcium-binding protein - like calcium-binding protein, Solanum tuberosum, gb:L02830                                                          | 254487_at   | -2   |
| putative protein stem-specific protein - Nicotiana tabacum,PID:g20037;supported by full-length cDNA: Ceres:35207.                             | 253874_at   | -2   |
| hypothetical protein ;supported by full-length cDNA: Ceres:18040.                                                                             | 253817_at   | -2   |
| putative auxin-induced protein high similarity to auxin-induced protein 15A, soybean, PIR2:JQ1096; supported by cDNA: gi_13194817_gb_         | 253103_at   | -2   |
| hypothetical protein                                                                                                                          | 252361_at   | -2   |
| putative protein various predicted proteins, Brassica rapa, Arabidopsis thaliana;supported by full-length cDNA: Ceres:26538.                  | 251013_at   | -2   |
| polygalacturonase inhibiting protein ;supported by full-length cDNA: Ceres:35527.                                                             | 250669_at   | -2   |
| GASA4 ; supported by cDNA: gi_950098_gb_U15683.1_ATU15683                                                                                     | 250109_at   | -2   |
| putative protein contains similarity to FKBP-type peptidyl-prolyl cis-trans isomerase                                                         | 248962_at   | -2   |
| 33 kDa secretory protein-like ; supported by cDNA: gi_15292980_gb_AY050924.1_                                                                 | 248686_at   | -2   |
| putative protein similar to unknown protein (pir T04819)                                                                                      | 248139_at   | -2   |
| putative protein similar to unknown protein (emb CAB79759.1)                                                                                  | 247880_at   | -2   |
| putative protein hypothetical protein - Ricinus communis, EMBL:Z81012;supported by full-length cDNA: Ceres:1351.                              | 246919_at   | -2   |
| putative protein retinal glutamic acid-rich protein, bovine, PIR:A40437;supported by full-length cDNA: Ceres:24151.                           | 246108_at   | -2   |
| AKIN beta1 ; supported by full-length cDNA: Ceres: 41668.                                                                                     | 246028_at   | -2   |
| glutaredoxin ;supported by full-length cDNA: Ceres:32219.                                                                                     | 245392_at   | -2   |
| Expressed protein ; supported by full-length cDNA: Ceres: 6580.                                                                               | 245336_at   | -2   |
| putative CCCH-type zinc finger protein identical to GB:U81238;supported by full-length cDNA: Ceres:39893.                                     | 266656_at   | -1.9 |
| pathogenesis-related PR-1-like protein identical to GB:M90508; supported by cDNA: gi_166860_gb_M90508.1_ATHRPRP1A                             | 266385_at   | -1.9 |
| unknown protein ;supported by full-length cDNA: Ceres:31665.                                                                                  | 265670_s_at | -1.9 |
| Expressed protein ; supported by full-length cDNA: Ceres: 19631.                                                                              | 263318_at   | -1.9 |
| putative response regulator 3 similar to ESTs gb T43772, emb Z34204, gb AA067391, and emb Z34620, implicated in His-to-Asp phosphot           | 263236_at   | -1.9 |
| glucose transporter almost identical to glucose transporter GB:P23586 from [Arabidopsis thaliana]; supported by full-length cDNA: Ceres: 3:   | 262456_at   | -1.9 |
| plastid ribosomal protein S6, putative similar to plastid ribosomal protein S6 precursor GB:AAF64311 GI:7582401 from [Spinacia oleracea];     | 261954_at   | -1.9 |
| endo-xyloglucan transferase, putative similar to endo-xyloglucan transferase GI:2244732 from [Gossypium hirsutum];supported by full-leng      | 261825_at   | -1.9 |
| transcription factor, putative contains AP2 domain                                                                                            | 261327_at   | -1.9 |
| TINY-like protein similar to TINY GB:CAA64359 GI:1246403 from [Arabidopsis thaliana];supported by full-length cDNA: Ceres:19721.              | 260856_at   | -1.9 |
| serine carboxypeptidase precursor, putative similar to GB:AAD42963 from [Matricaria chamomilla]                                               | 260739_at   | -1.9 |
| hypothetical protein predicted by genefinder;supported by full-length cDNA: Ceres:99920.                                                      | 260427_at   | -1.9 |
| unknown protein ; supported by full-length cDNA: Ceres: 16614.                                                                                | 259841_at   | -1.9 |
| hypothetical protein predicted by genscan+;supported by full-length cDNA: Ceres:6768.                                                         | 258676_at   | -1.9 |

|                                                                                                                                              |             |      |
|----------------------------------------------------------------------------------------------------------------------------------------------|-------------|------|
| hypothetical protein predicted by genefinder;supported by full-length cDNA: Ceres:12509.                                                     | 256442_at   | -1.9 |
| transcriptional activator CBF1, putative similar to transcriptional activator CBF1 GI:1899058 from [Arabidopsis thaliana                     | 255937_at   | -1.9 |
| putative protein                                                                                                                             | 255692_at   | -1.9 |
| putative xyloglucan endotransglycosylase ;supported by full-length cDNA: Ceres:17748.                                                        | 255433_at   | -1.9 |
| putative protein                                                                                                                             | 254794_at   | -1.9 |
| putative protein GATA transcription factor 3, Arabidopsis thaliana, gb:Y13650                                                                | 253406_at   | -1.9 |
| putative protein probable arabinogalactan protein precursor, Lycopersicon esculentum, PIR2:S55925; supported by cDNA: gi_11935087_gl         | 253050_at   | -1.9 |
| auxin-induced protein - like auxin-inducible SAUR gene, Raphanus sativus,AB000708;supported by full-length cDNA: Ceres:10140.                | 252972_at   | -1.9 |
| putative gamma-glutamyltransferase gamma-glutamyltransferase, Arabidopsis thaliana, PIR2:S58286                                              | 252906_at   | -1.9 |
| lipid-transfer protein-like protein nonspecific lipid transfer protein, loblolly pine, PIR:S51816;supported by full-length cDNA: Ceres:8461. | 252711_at   | -1.9 |
| hypothetical protein                                                                                                                         | 252501_at   | -1.9 |
| dUTP pyrophosphatase-like protein dUTP pyrophosphatase - Lycopersicon esculentum,PIR2:JQ1599; supported by cDNA: gi_13878142_c               | 252442_at   | -1.9 |
| receptor protein kinase - like protein CLAVATA1 receptor kinase, Arabidopsis thaliana, EMBL:ATU96879                                         | 252272_at   | -1.9 |
| putative protein ;supported by full-length cDNA: Ceres:40252.                                                                                | 250936_at   | -1.9 |
| putative protein DRT100 protein precursor, Arabidopsis thaliana, PIR:A46260;supported by full-length cDNA: Ceres:41409.                      | 250277_at   | -1.9 |
| nodulin-like protein                                                                                                                         | 250217_at   | -1.9 |
| putative protein ;supported by full-length cDNA: Ceres:1198.                                                                                 | 250098_at   | -1.9 |
| glutaredoxin -like protein glutaredoxin, castor bean, PIR:S54825;supported by full-length cDNA: Ceres:92720.                                 | 249996_at   | -1.9 |
| calcium-binding protein - like cbp1 calcium-binding protein, Lotus japonicus, EMBL:LJA251808; supported by cDNA: gi_16648829_gb_AY0          | 249417_at   | -1.9 |
| putative protein similar to unknown protein (pir T05073)                                                                                     | 248865_at   | -1.9 |
| Expressed protein ; supported by cDNA: gi_15809953_gb_AY054245.1_                                                                            | 245264_at   | -1.9 |
| unknown protein ;supported by full-length cDNA: Ceres:23203.                                                                                 | 245143_at   | -1.9 |
| putative WRKY-type DNA-binding protein ; supported by cDNA: gi_13506742_gb_AF224704.1_AF224704                                               | 245051_at   | -1.9 |
| unknown protein                                                                                                                              | 257381_at   | -1.9 |
| putative protein similar to unknown protein (emb CAB67623.1)                                                                                 | 250696_at   | -1.9 |
| 30S ribosomal protein S31 ;supported by full-length cDNA: Ceres:4723.                                                                        | 267088_at   | -1.8 |
| unknown protein ;supported by full-length cDNA: Ceres:31586.                                                                                 | 267092_at   | -1.8 |
| hypothetical protein predicted by genefinder;supported by full-length cDNA: Ceres:9671.                                                      | 266334_at   | -1.8 |
| putative two-component response regulator protein ; supported by cDNA: gi_11870067_gb_AF305721.1_AF305721                                    | 266078_at   | -1.8 |
| putative peroxidase ATP2a ;supported by full-length cDNA: Ceres:3571.                                                                        | 265471_at   | -1.8 |
| aquaporin (plasma membrane intrinsic protein 2C) water channel protein in plasma membrane;supported by full-length cDNA: Ceres:11998.        | 265444_s_at | -1.8 |
| hypothetical protein predicted by genscan; supported by cDNA: gi_15724317_gb_AF412099.1_AF412099                                             | 265342_at   | -1.8 |
| unknown protein                                                                                                                              | 264385_at   | -1.8 |
| unknown protein ; supported by full-length cDNA: Ceres: 270281.                                                                              | 264342_at   | -1.8 |
| Expressed protein ; supported by full-length cDNA: Ceres: 10388.                                                                             | 264262_at   | -1.8 |
| Expressed protein ; supported by full-length cDNA: Ceres: 5586.                                                                              | 264164_at   | -1.8 |
| unknown protein ;supported by full-length cDNA: Ceres:641.                                                                                   | 263421_at   | -1.8 |
| AMP-binding protein, putative contains Pfam profile: PF00501 AMP-binding enzyme                                                              | 262698_at   | -1.8 |
| unknown protein EST gb AA586241 comes from this gene                                                                                         | 262488_at   | -1.8 |
| S-adenosyl-methionine-sterol-C-methyltransferase, putative almost identical to S-adenosyl-methionine-sterol-C-methyltransferase GI:22464     | 261727_at   | -1.8 |
| delta 9 desaturase identical to delta 9 desaturase GB:BAA25180 GI:2970034 from [Arabidopsis thaliana]; supported by full-length cDNA: Ce     | 260957_at   | -1.8 |
| hypothetical protein predicted by genemark.hmm                                                                                               | 260919_at   | -1.8 |
| response regulator 5, putative similar to response regulator 5 GI:3953599 from [Arabidopsis thaliana]; supported by cDNA: gi_3953602_dbj     | 259466_at   | -1.8 |
| MtN3-like protein similar to MtN3 GB:CAA69976 from [Medicago truncatula]                                                                     | 258421_at   | -1.8 |
| putative delta 9 desaturase similar to delta 9 desaturase GB:BAA25180 [Arabidopsis thaliana];supported by full-length cDNA: Ceres:25205.     | 258250_at   | -1.8 |
| unknown protein ; supported by cDNA: gi_16974601_gb_AY060578.1_                                                                              | 258244_at   | -1.8 |
| unknown protein                                                                                                                              | 256828_at   | -1.8 |
| unknown protein contains Pfam profile: PF01165 ribosomal protein S21; supported by cDNA: gi_14532553_gb_AY039901.1_                          | 256753_at   | -1.8 |
| unknown protein ;supported by full-length cDNA: Ceres:31357.                                                                                 | 256674_at   | -1.8 |
| histone H2A, putative similar to histone H2A GB:AAF64418 GI:7595337 from [Arabidopsis thaliana] (Proc. Natl. Acad. Sci. U.S.A. 97 (2), 94    | 256666_at   | -1.8 |
| hypothetical protein, 5 partial                                                                                                              | 256626_at   | -1.8 |
| unknown protein ;supported by full-length cDNA: Ceres:35218.                                                                                 | 256522_at   | -1.8 |
| zinc-finger protein, putative similar to GI:5262161 from [Arabidopsis thaliana]; supported by cDNA: gi_16323142_gb_AY057675.1_               | 256469_at   | -1.8 |

|                                                                                                                                             |             |      |
|---------------------------------------------------------------------------------------------------------------------------------------------|-------------|------|
| unknown protein ;supported by full-length cDNA: Ceres:28780.                                                                                | 256062_at   | -1.8 |
| extensin-like protein extensin-like protein, Zea mays, PIR2:S49915                                                                          | 254770_at   | -1.8 |
| extensin-like protein extensin-like protein - maize, PIR2:S49915                                                                            | 254635_at   | -1.8 |
| putative protein ; supported by full-length cDNA: Ceres: 37881.                                                                             | 253464_at   | -1.8 |
| putative protein predicted protein, Arabidopsis thaliana;supported by full-length cDNA: Ceres:33704.                                        | 253043_at   | -1.8 |
| histone H2A.F/Z ;supported by full-length cDNA: Ceres:33085.                                                                                | 251846_at   | -1.8 |
| beta-1,3-glucanase                                                                                                                          | 251673_at   | -1.8 |
| anthranilate N-benzoyltransferase - like protein anthranilate N-benzoyltransferase, clove pink, PIR:T10717; supported by cDNA: gi_159122    | 251144_at   | -1.8 |
| putative protein ; supported by cDNA: gi_13358223_gb_AF325034.2_AF325034                                                                    | 251036_at   | -1.8 |
| 6-phosphogluconolactonase-like protein ;supported by full-length cDNA: Ceres:13806.                                                         | 249732_at   | -1.8 |
| putative protein similar to unknown protein (sp)P42404);supported by full-length cDNA: Ceres:15004.                                         | 248348_at   | -1.8 |
| putative protein similar to unknown protein (pir)T02893)                                                                                    | 248302_at   | -1.8 |
| transcription factor Hap5a-like protein                                                                                                     | 247388_s_at | -1.8 |
| unknown protein ;supported by full-length cDNA: Ceres:108595.                                                                               | 247189_at   | -1.8 |
| putative protein contains similarity to pathogenesis-related protein;supported by full-length cDNA: Ceres:2152.                             | 247074_at   | -1.8 |
| putative protein predicted protein, Arabidopsis thaliana;supported by full-length cDNA: Ceres:32599.                                        | 246550_at   | -1.8 |
| bZIP DNA-binding protein-like putative bZIP DNA-binding protein - Capsicum chinense, EMBL:AF127797                                          | 246522_at   | -1.8 |
| putative protein hypothetical protein F16B3.27 - Arabidopsis thaliana, EMBL:AC021640;supported by full-length cDNA: Ceres:18222.            | 246505_at   | -1.8 |
| hypothetical protein predicted by genemark.hmm                                                                                              | 245771_at   | -1.8 |
| SUPERMAN like protein                                                                                                                       | 245383_at   | -1.8 |
| ethylene responsive element binding factor-like protein (AtERF6) ; supported by cDNA: gi_3298497_dbj_AB013301.1_AB013301                    | 245250_at   | -1.8 |
| hypothetical protein predicted by genemark.hmm                                                                                              | 264693_at   | -1.8 |
| TINY-like transcription factor Contains similarity to transcription factor (TINY) isolog T02O04.22 gb 2062174 from A. thaliana BAC gb AC001 | 264202_at   | -1.8 |
| putative serine carboxypeptidase I ; supported by cDNA: gi_14334757_gb_AY035052.1_                                                          | 267262_at   | -1.7 |
| unknown protein                                                                                                                             | 267116_at   | -1.7 |
| E2, ubiquitin-conjugating enzyme 6 (UBC6) identical to gi 431267, SP:P42750, PIR:S52661; contains a ubiquitin-conjugating enzymes activ     | 266604_at   | -1.7 |
| hypothetical protein predicted by genscan                                                                                                   | 265724_at   | -1.7 |
| putative RING zinc finger protein ; supported by cDNA: gi_3790572_gb_AF078824.1_AF078824                                                    | 264854_at   | -1.7 |
| unknown protein                                                                                                                             | 264774_at   | -1.7 |
| putative xyloglucan-specific glucanase identical to GB:D63509;supported by full-length cDNA: Ceres:18876.                                   | 263598_at   | -1.7 |
| unknown protein                                                                                                                             | 262694_at   | -1.7 |
| ribosomal protein S9, putative similar to ribosomal protein S9 GI:5456946 from [Arabidopsis thaliana]; supported by full-length cDNA: Ceres | 262172_at   | -1.7 |
| hypothetical protein ;supported by full-length cDNA: Ceres:265772.                                                                          | 259550_at   | -1.7 |
| class 2 non-symbiotic hemoglobin identical to class 2 non-symbiotic hemoglobin GB:AAB82770 [Arabidopsis thaliana]; supported by full-len    | 258920_at   | -1.7 |
| unknown protein similar to hypothetical proteins GB:CAB16818, GB:AAD55277                                                                   | 258911_at   | -1.7 |
| unknown protein                                                                                                                             | 258462_at   | -1.7 |
| indoleacetic acid (IAA)-inducible gene (IAA7) identical to (IAA7) gene GB:U18409 [Arabidopsis thaliana] (J. Mol. Biol. 251 (4), 533-549 (19 | 257769_at   | -1.7 |
| unknown protein                                                                                                                             | 257615_at   | -1.7 |
| unknown protein                                                                                                                             | 256262_at   | -1.7 |
| mitochondrial inner membrane translocase component, putative similar to mitochondrial inner membrane translocase component Tim17a G         | 255941_at   | -1.7 |
| putative protein A. thaliana hypothetical protein F1N20.70, GenBank accession number AL022140;supported by full-length cDNA: Ceres:11       | 255285_at   | -1.7 |
| pollen-specific protein - like 18.3K protein precursor, pollen, Zea mays, PIR2:JQ1107                                                       | 254620_at   | -1.7 |
| cytokinin oxidase - like protein cytokinin oxidase, Zea mays, gb:Y18377; supported by cDNA: gi_15450760_gb_AY054460.1_                      | 253696_at   | -1.7 |
| putative protein ENOD16, Medicago truncatula, X99466;supported by full-length cDNA: Ceres:6308.                                             | 253480_at   | -1.7 |
| SF16 -like protein SF16 protein, pollen specific, helianthus annuus, PIR:T13992;supported by full-length cDNA: Ceres:39013.                 | 252280_at   | -1.7 |
| putative protein predicted protein, Arabidopsis thaliana                                                                                    | 252250_at   | -1.7 |
| expressed protein supported by cDNA: gi:15450891                                                                                            | 252048_at   | -1.7 |
| SRG1 - like protein SRG1 protein, Arabidopsis thaliana, PIR:S44261                                                                          | 251402_at   | -1.7 |
| putative protein putative protein At2g46160 - EMBL:AC005397; supported by cDNA: gi_16226238_gb_AF428280.1_AF428280                          | 251330_at   | -1.7 |
| putative protein similar to unknown protein (gb)AAF01528.1)                                                                                 | 250796_at   | -1.7 |
| ubiquinol-cytochrome C reductase complex ubiquinone-binding protein (QP-C)-like protein (gb)AAF19563.1)                                     | 250800_at   | -1.7 |
| histone H3 - like protein histone H3, Arabidopsis thaliana, PIR:S06250                                                                      | 250434_at   | -1.7 |
| serine carboxypeptidase II-like protein                                                                                                     | 249847_at   | -1.7 |

|                                                                                                                                                      |             |      |
|------------------------------------------------------------------------------------------------------------------------------------------------------|-------------|------|
| putative protein contains similarity to surface protein; supported by cDNA: gi_16648846_gb_AY058201.1_                                               | 249037_at   | -1.7 |
| putative protein contains similarity to bZIP transcription factor; supported by full-length cDNA: Ceres:43004.                                       | 248606_at   | -1.7 |
| unknown protein ;supported by full-length cDNA: Ceres:31129.                                                                                         | 248186_at   | -1.7 |
| CONSTANS-like B-box zinc finger protein-like ;supported by full-length cDNA: Ceres:6639.                                                             | 247921_at   | -1.7 |
| histone H2A - like protein histone H2A, parsley, PIR:S11498; supported by full-length cDNA: Ceres:20036.                                             | 247651_at   | -1.7 |
| 60S ribosomal protein L26 ;supported by full-length cDNA: Ceres:2561.                                                                                | 247010_at   | -1.7 |
| putative protein ;supported by full-length cDNA: Ceres:14064.                                                                                        | 245980_at   | -1.7 |
| phosphate-induced (phi-1) protein, putative similar to phi-1 GB:BAA33810 GI:3759184 from [Nicotiana tabacum]; supported by full-length cDNA          | 245757_at   | -1.7 |
| hypothetical protein similar to putative disease resistance protein GB:AA14512 GI:2739389 from [Arabidopsis thaliana]; supported by full-length cDNA | 245768_at   | -1.7 |
| hypothetical protein ; supported by cDNA: gi_15912320_gb_AY056438.1_                                                                                 | 245266_at   | -1.7 |
| hypothetical protein similar to hypothetical protein GB:AAF24588 GI:6692123 from [Arabidopsis thaliana]                                              | 257467_at   | -1.7 |
| putative protein contains similarity to elicitor-inducible receptor-like protein                                                                     | 247087_at   | -1.7 |
| omega-3 fatty acid desaturase identical to GB:D26508 and GB:D17579; supported by cDNA: gi_1030693_dbj_D17579.1_ATHFADIER2                            | 266865_at   | -1.6 |
| putative RNA-binding protein                                                                                                                         | 266715_at   | -1.6 |
| putative plasma membrane intrinsic protein ;supported by full-length cDNA: Ceres:36296.                                                              | 266533_s_at | -1.6 |
| hypothetical protein                                                                                                                                 | 266150_s_at | -1.6 |
| hypothetical protein predicted by genefinder; supported by cDNA: gi_13877832_gb_AF370179.1_AF370179                                                  | 266001_at   | -1.6 |
| putative histone H2B ;supported by full-length cDNA: Ceres:31973.                                                                                    | 265960_at   | -1.6 |
| putative beta-1,3-glucanase                                                                                                                          | 265377_at   | -1.6 |
| unknown protein                                                                                                                                      | 265265_at   | -1.6 |
| unknown protein ;supported by full-length cDNA: Ceres:25136.                                                                                         | 264635_at   | -1.6 |
| similar to early nodulins                                                                                                                            | 264377_at   | -1.6 |
| putative NPK1-related protein kinase 2 similar to nitrate chlorate transporter GB:Q05085 from (Arabidopsis thaliana); supported by cDNA: gi          | 264348_at   | -1.6 |
| unknown protein Strong similarity to gb D14550 extracellular dermal glycoprotein (EDGP) precursor from Daucus carota. ESTs gb H37281,                | 264365_s_at | -1.6 |
| hypothetical protein predicted by genefinder                                                                                                         | 263674_at   | -1.6 |
| unknown protein ; supported by full-length cDNA: Ceres: 17752.                                                                                       | 263496_at   | -1.6 |
| hypothetical protein                                                                                                                                 | 263442_at   | -1.6 |
| putative fatty acid elongase ;supported by full-length cDNA: Ceres:115769.                                                                           | 263443_at   | -1.6 |
| auxin transport protein REH1, putative similar to auxin transport protein REH1 GI:3377509 from [Oryza sativa]; supported by cDNA: gi_581             | 262263_at   | -1.6 |
| unknown protein ;supported by full-length cDNA: Ceres:21798.                                                                                         | 262283_at   | -1.6 |
| expansin 10 identical to GB:AAF61712 from [Arabidopsis thaliana]; supported by full-length cDNA: Ceres:14132.                                        | 261266_at   | -1.6 |
| plastid ribosomal protein L34 precursor, putative similar to plastid ribosomal protein L34 precursor GB:AAF64157 GI:7578860 from [Spinacia           | 260898_at   | -1.6 |
| putative trypsin inhibitor ;supported by full-length cDNA: Ceres:15927.                                                                              | 260546_at   | -1.6 |
| hypothetical protein predicted by genscan+                                                                                                           | 260167_at   | -1.6 |
| hypothetical protein                                                                                                                                 | 259523_at   | -1.6 |
| putative phosphate/phosphoenolpyruvate translocator similar to phosphate/phosphoenolpyruvate translocator precursor GB:AAB40648 [Nic                 | 259185_at   | -1.6 |
| carbonic anhydrase, chloroplast precursor identical to carbonic anhydrase, chloroplast precursor GB:P27140 [Arabidopsis thaliana]; support           | 259161_at   | -1.6 |
| unknown protein ;supported by full-length cDNA: Ceres:22225.                                                                                         | 259104_at   | -1.6 |
| hypothetical protein similar to calmodulin-like protein GB:CAB42906 [Arabidopsis thaliana]; Pfam HMM hit: EF hand; supported by full-length cDNA     | 258947_at   | -1.6 |
| putative oxidoreductase similar to phytoene desaturase GB:P28553 from [Glycine max]; supported by full-length cDNA: Ceres:17350.                     | 258708_at   | -1.6 |
| proline oxidase, mitochondrial precursor (osmotic stress-induced proline dehydrogenase) identical to GB:P92983 from [Arabidopsis thaliana]           | 257315_at   | -1.6 |
| Expressed protein ; supported by full-length cDNA: Ceres: 11616.                                                                                     | 257204_at   | -1.6 |
| unknown protein ;supported by full-length cDNA: Ceres:20771.; supported by cDNA: gi_10880500_gb_AF195893.1_AF195893                                  | 256964_at   | -1.6 |
| galactosidase, putative similar to BETA-GALACTOSIDASE PRECURSOR (LACTASE) GB:P48980 from [Lycopersicon esculentum]                                   | 256772_at   | -1.6 |
| disease resistance protein, putative similar to disease resistance protein RPP1-WsA [Arabidopsis thaliana] GI:3860163; supported by full-length cDNA | 256526_at   | -1.6 |
| putative ribonucleoprotein similarity to ovarian RNA-binding protein and translational control factor (bruno)- Drosophila melanogaster, EMBL:1       | 255411_at   | -1.6 |
| putative phi-1-like phosphate-induced protein ;supported by full-length cDNA: Ceres:3552.                                                            | 255064_at   | -1.6 |
| magnesium-protoporphyrin IX methyltransferase - like protein magnesium-protoporphyrin IX methyltransferase, Synechocystis sp, PIR2:S7                | 254105_at   | -1.6 |
| putative calcium-binding protein calcium binding domains (EF hand) of several proteins                                                               | 252417_at   | -1.6 |
| putative protein various predicted proteins                                                                                                          | 252178_at   | -1.6 |
| pectate lyase -like protein pectate lyase, Musa acuminata, EMBL:MAPEL; supported by full-length cDNA: Ceres:119092.                                  | 251982_at   | -1.6 |
| transport protein subunit - like S61B_ARATH PROTEIN TRANSPORT PROTEIN SEC61 BETA SUBUNIT, Arabidopsis thaliana, SWISSPROT                            | 251422_at   | -1.6 |
| putative protein                                                                                                                                     | 250980_at   | -1.6 |

|                                                                                                                                               |             |      |
|-----------------------------------------------------------------------------------------------------------------------------------------------|-------------|------|
| putative protein similar to unknown protein (gb AAB61527.1)                                                                                   | 249727_at   | -1.6 |
| putative protein predicted protein, Arabidopsis thaliana;supported by full-length cDNA: Ceres:26524.                                          | 249379_at   | -1.6 |
| unknown protein ;supported by full-length cDNA: Ceres:42577.                                                                                  | 249288_at   | -1.6 |
| putative protein similar to unknown protein (pir  C71410)                                                                                     | 249118_at   | -1.6 |
| putative protein similar to unknown protein (gb AAC61815.1);supported by full-length cDNA: Ceres:254442.                                      | 248868_at   | -1.6 |
| ribosomal protein, chloroplast ribosomal protein PsCL18 precursor, chloroplast - Pisum sativum, PIR:R5PM18; supported by cDNA: gi_145!        | 246294_at   | -1.6 |
| putative protein ;supported by full-length cDNA: Ceres:39563.                                                                                 | 245981_at   | -1.6 |
| bZIP transcription factor family protein similar to seed storage protein opaque-2(bZIP family)GI:168428 from Zea mays; supported by cDNA      | 245925_at   | -1.6 |
| hypothetical protein ; supported by full-length cDNA: Ceres: 933.                                                                             | 245304_at   | -1.6 |
| unknown protein predicted by genscan; supported by cDNA: gi_3822215_gb_AF074948.1_AF074948                                                    | 245138_at   | -1.6 |
| hypothetical protein                                                                                                                          | 252535_at   | -1.6 |
| hypothetical protein similar to hypothetical protein GB:AAF19755 GI:6634775 from [Arabidopsis thaliana]                                       | 261801_at   | -1.6 |
| putative protein lateral root primordia (LRP1) - Arabidopsis thaliana, EMBL:AT24702; supported by cDNA: gi_15450614_gb_AY052675.1_            | 251900_at   | -1.6 |
| myb-like protein isolog                                                                                                                       | 267495_at   | -1.5 |
| unknown protein ; supported by cDNA: gi_13877742_gb_AF370134.1_AF370134                                                                       | 267339_at   | -1.5 |
| unknown protein ;supported by full-length cDNA: Ceres:6950.                                                                                   | 267238_at   | -1.5 |
| Expressed protein ; supported by full-length cDNA: Ceres: 124634.                                                                             | 266808_at   | -1.5 |
| unknown protein                                                                                                                               | 266813_at   | -1.5 |
| putative ethylene response element binding protein (EREBP) ;supported by full-length cDNA: Ceres:6397.                                        | 266821_at   | -1.5 |
| putative glutathione S-transferase ;supported by full-length cDNA: Ceres:27915.; supported by cDNA: gi_11095995_gb_AF288181.1_AF28            | 266746_s_at | -1.5 |
| putative chloroplast ribosomal protein L35                                                                                                    | 266570_at   | -1.5 |
| unknown protein                                                                                                                               | 266285_at   | -1.5 |
| unknown protein ; supported by cDNA: gi_15027852_gb_AY045783.1_                                                                               | 265773_at   | -1.5 |
| beta-expansin ;supported by full-length cDNA: Ceres:109135.                                                                                   | 265443_at   | -1.5 |
| Expressed protein ; supported by full-length cDNA: Ceres: 38093.                                                                              | 265025_at   | -1.5 |
| putative sulphate transporter protein strongly similar to GB:BAA75015, location of EST gb W43788 and gb N96564; supported by cDNA: gi_        | 264901_at   | -1.5 |
| putative metalloproteinase similar to GB:AAB61099                                                                                             | 264866_at   | -1.5 |
| unknown protein Contains similarity to Rhodococcus amidase (gb D16207). ESTs gb T20504,gb H36650,gb N97423,gb H36595 come from                | 264653_at   | -1.5 |
| putative muT domain protein                                                                                                                   | 263852_at   | -1.5 |
| putative auxin-induced protein, IAA17/AXR3-1 Identical to Arabidopsis gb AF040632 and gb U49073 IAA17/AXR3 gene. ESTs gb H36782 ;             | 263664_at   | -1.5 |
| unknown protein ; supported by cDNA: gi_6691164_gb_AF218765.1_AF218765                                                                        | 263498_at   | -1.5 |
| arginine decarboxylase identical to GP:1590814:U52851; supported by cDNA: gi_1590813_gb_U52851.1_ATU52851                                     | 263241_at   | -1.5 |
| hypothetical protein similar to hypothetical protein GB:AAF24593 GI:6692128 from [Arabidopsis thaliana]                                       | 262552_at   | -1.5 |
| unknown protein ;supported by full-length cDNA: Ceres:12408.                                                                                  | 262168_at   | -1.5 |
| AP2 domain containing protein, putative similar to AP2 domain containing protein GI:2281633 from [Arabidopsis thaliana]; supported by cD      | 262135_at   | -1.5 |
| unknown protein                                                                                                                               | 261981_at   | -1.5 |
| Expressed protein ; supported by full-length cDNA: Ceres: 19170.                                                                              | 261488_at   | -1.5 |
| hypothetical protein predicted by genemark.hmm;supported by full-length cDNA: Ceres:3200.                                                     | 261456_at   | -1.5 |
| unknown protein                                                                                                                               | 261175_at   | -1.5 |
| hypothetical protein predicted by genemark.hmm; supported by full-length cDNA: Ceres: 19263.                                                  | 260983_at   | -1.5 |
| hypothetical protein predicted by genemark.hmm                                                                                                | 260656_at   | -1.5 |
| myb-related protein, putative similar to GB:CAB91874 from [Lycopersicon esculentum]                                                           | 260664_at   | -1.5 |
| homeobox gene 13 protein identical to homeobox gene 13 protein gb AAF20996.1 AF208044_1 [Arabidopsis thaliana];supported by full-len          | 260395_at   | -1.5 |
| hypothetical protein predicted by genefinder                                                                                                  | 259996_at   | -1.5 |
| unknown protein ;supported by full-length cDNA: Ceres:29624.                                                                                  | 259979_at   | -1.5 |
| thaumatin-like protein similar to thaumatin GB:AAD55090 [Vitis riparia]; contains Pfam profile: PF00314 Thaumatin family; supported by cD     | 259925_at   | -1.5 |
| unknown protein ;supported by full-length cDNA: Ceres:21305.                                                                                  | 259838_at   | -1.5 |
| myb-related transcription factor, putative similar to GI:1430846 from [Lycopersicon esculentum]                                               | 259822_at   | -1.5 |
| hypothetical protein predicted by genemark.hmm                                                                                                | 259398_at   | -1.5 |
| DNA-binding protein RAV1 identical to RAV1 GI:3868857 from [Arabidopsis thaliana]; supported by cDNA: gi_3868856_dbj_AB013886.1_A             | 259364_at   | -1.5 |
| putative APG protein similar to anter-specific proline-rich protein APG precursor SP:P40602 (Arabidopsis thaliana); contains Pfam profile: Pl | 259375_at   | -1.5 |
| unknown protein identical to GB:AAD56318 (Arabidopsis thaliana)                                                                               | 259211_at   | -1.5 |
| unknown protein similar to hypothetical protein GB:AAC17612 [Arabidopsis thaliana];supported by full-length cDNA: Ceres:251012.               | 259015_at   | -1.5 |

|                                                                                                                                           |             |      |
|-------------------------------------------------------------------------------------------------------------------------------------------|-------------|------|
| unknown protein ; supported by cDNA: gi_15081621_gb_AY048203.1_                                                                           | 259020_at   | -1.5 |
| putative monodehydroascorbate reductase (NADH) similar to monodehydroascorbate reductase (NADH) GB:JU0182 [Cucumis sativus]; sup          | 258941_at   | -1.5 |
| putative pectin methylesterase similar to pectin methylesterase GB:Q42534 from [Arabidopsis thaliana];supported by full-length cDNA: Cere | 258369_at   | -1.5 |
| unknown protein                                                                                                                           | 257868_at   | -1.5 |
| unknown protein ;supported by full-length cDNA: Ceres:96816.                                                                              | 257793_at   | -1.5 |
| hypothetical protein predicted by genemark.hmm                                                                                            | 257697_at   | -1.5 |
| xyloglucan endotransglycosylase, putative similar to xyloglucan endotransglycosylase 1 GB:CAA10231 from [Fagus sylvatica] (Plant Physic   | 257203_at   | -1.5 |
| unknown protein                                                                                                                           | 257076_at   | -1.5 |
| cysteine proteinase contains similarity to cysteine proteinase RD21A (thiol protease) GI:435619, SP:P43297 from [Arabidopsis thaliana]    | 254915_s_at | -1.5 |
| beta-1,3-glucanase-like protein strong similarity to endo-beta-1,3-beta-D-glucosidase, Nicotiana tabacum, PIR2:S46495                     | 254665_at   | -1.5 |
| putative protein hypothetical protein T8K22.16, Arabidopsis thalianachromosome II BAC T8K22, PATX:G3184285; supported by cDNA: gi_        | 254132_at   | -1.5 |
| histone H2A- like protein histone H2A.4, Triticum aestivum, PIR2:S53521; supported by full-length cDNA: Ceres: 927.                       | 253920_at   | -1.5 |
| putative protein mRNAs from Ricinus communis and Medicago sativa, Z81012 and L36159;supported by full-length cDNA: Ceres:37529.           | 253437_at   | -1.5 |
| putative thaumatin-like protein thaumatin-like protein precursor Mdt11, pathogenesis-related - Malus domestica, PID:g3643249;supported by | 252954_at   | -1.5 |
| hypothetical protein ; supported by cDNA: gi_15529203_gb_AY052226.1_                                                                      | 252853_at   | -1.5 |
| putative protein putative zinc-finger protein - Arabidopsis thaliana,PID:g4406777;supported by full-length cDNA: Ceres:261699.            | 252322_at   | -1.5 |
| hypothetical protein                                                                                                                      | 252251_at   | -1.5 |
| cyclin D3-like protein Nicotiana tabacum NtcycD3-1 - Nicotiana tabacum, EMBL:AB015222;supported by full-length cDNA: Ceres:36056.         | 252189_at   | -1.5 |
| nucleoid DNA-binding - like protein nucleoid DNA-binding protein cnd41, chloroplast, common tobacco, PIR:T01996; supported by full-leng   | 251899_at   | -1.5 |
| putative protein unknown protein At2g44130 - Arabidopsis thaliana, EMBL:AC004005;supported by full-length cDNA: Ceres:8014.               | 251443_at   | -1.5 |
| unknown protein ;supported by full-length cDNA: Ceres:7709.                                                                               | 251395_at   | -1.5 |
| LAX1 / AUX1 -like permease                                                                                                                | 251133_at   | -1.5 |
| cytochrome P450 90A1 (sp)Q42569) ; supported by full-length cDNA: Ceres: 36334.                                                           | 250752_at   | -1.5 |
| putative protein                                                                                                                          | 250376_at   | -1.5 |
| proline-rich protein predicted protein F24P17.17 - Arabidopsis thaliana, EMBL:AC011623                                                    | 250002_at   | -1.5 |
| putative protein similar to unknown protein (gb)AAB68039.1);supported by full-length cDNA: Ceres:1076.                                    | 248432_at   | -1.5 |
| putative protein similar to unknown protein (pir  S77140); supported by full-length cDNA: Ceres: 14354.                                   | 248285_at   | -1.5 |
| 50S ribosomal protein L24, chloroplast precursor ;supported by full-length cDNA: Ceres:27973.                                             | 248174_at   | -1.5 |
| unknown protein ; supported by cDNA: gi_16226274_gb_AF428289.1_AF428289                                                                   | 247903_at   | -1.5 |
| peroxidase ;supported by full-length cDNA: Ceres:124846.                                                                                  | 247812_at   | -1.5 |
| histone H4 - like protein histone H4, Zea mays, PIR:HSZM4;supported by full-length cDNA: Ceres:15418.                                     | 247692_s_at | -1.5 |
| invertase inhibitor homolog (emb)CAA73335.1) ;supported by full-length cDNA: Ceres:25884.                                                 | 247246_at   | -1.5 |
| putative protein ;supported by full-length cDNA: Ceres:21085.                                                                             | 246548_at   | -1.5 |
| sugar transporter like protein                                                                                                            | 246238_at   | -1.5 |
| seed imbibition protein-like seed imbibition protein Sip1 - Hordeum vulgare, EMBL:M77475                                                  | 246114_at   | -1.5 |
| putative protein predicted proteins - Arabidopsis thaliana;supported by full-length cDNA: Ceres:2537.                                     | 245984_at   | -1.5 |
| putative protein ;supported by full-length cDNA: Ceres:42742.                                                                             | 245906_at   | -1.5 |
| histone H2A, putative similar to histone H2A GI:9758956 from [Arabidopsis thaliana]; supported by cDNA: gi_13877850_gb_AF370188.1_A       | 245750_at   | -1.5 |
| phytochrome kinase substrate 1 - like protein                                                                                             | 245696_at   | -1.5 |
| pectate lyase like protein pectate lyase -Fragaria x ananassa,PID:g2435395                                                                | 254754_at   | -1.5 |
| Expressed protein ; supported by full-length cDNA: Ceres: 30472.                                                                          | 267555_at   | -1.4 |
| calmodulin (cam2)                                                                                                                         | 267064_at   | -1.4 |
| expressed protein supported by full-length cDNA: Ceres:3350                                                                               | 266950_at   | -1.4 |
| predicted by genefinder and genscan                                                                                                       | 266742_at   | -1.4 |
| unknown protein                                                                                                                           | 266366_at   | -1.4 |
| putative chlorophyll a/b binding protein ; supported by full-length cDNA: Ceres: 6454.                                                    | 265722_at   | -1.4 |
| hypothetical protein similar to putative glucosyltransferase GB:AAD15455 GI:4263795 from (Arabidopsis thaliana)                           | 265175_at   | -1.4 |
| unknown protein ;supported by full-length cDNA: Ceres:1011.                                                                               | 264590_at   | -1.4 |
| putative auxin-regulated protein                                                                                                          | 264014_at   | -1.4 |
| putative harpin-induced protein ;supported by full-length cDNA: Ceres:19481.                                                              | 263951_at   | -1.4 |
| unknown protein                                                                                                                           | 263869_at   | -1.4 |
| unknown protein ;supported by full-length cDNA: Ceres:11114.                                                                              | 263628_at   | -1.4 |
| unknown protein                                                                                                                           | 262970_at   | -1.4 |



|                                                                                                                                                                             |             |      |
|-----------------------------------------------------------------------------------------------------------------------------------------------------------------------------|-------------|------|
| 50S ribosomal protein L21 chloroplast precursor (CL21) identical to GB:P51412 GI:1710424 from [Arabidopsis thaliana]; supported by cDN.                                     | 262029_at   | -1.4 |
| hypothetical protein predicted by genemark.hmm                                                                                                                              | 261772_at   | -1.4 |
| Expressed protein ; supported by full-length cDNA: Ceres: 11759.                                                                                                            | 261638_at   | -1.4 |
| regulatory protein HAL3B similar to GB:AAB53106 from [Arabidopsis thaliana]; supported by full-length cDNA: Ceres: 412.                                                     | 261306_at   | -1.4 |
| RAS-related protein ARA-1 identical to SP:P19892 from [Arabidopsis thaliana] (Gene 76:313-319(1989))                                                                        | 261252_at   | -1.4 |
| ribosomal protein L11, putative similar to chloroplast ribosomal protein L11 GI:21312 from [Spinacia oleracea];supported by full-length cDN.                                | 261190_at   | -1.4 |
| chloroplast nucleoid DNA binding protein, putative similar to chloroplast nucleoid DNA binding protein GB:BAA22813 GI:2541876 from [Nicotiana glauca]                       | 261055_at   | -1.4 |
| putative trypsin inhibitor ; supported by cDNA: gi_15292710_gb_AY050789.1_                                                                                                  | 260551_at   | -1.4 |
| unknown protein similar to Ca+2-binding EF hand protein GB:AAB71227 [Glycine max];supported by full-length cDNA: Ceres:5143.                                                | 260208_s_at | -1.4 |
| 30S ribosomal protein S17, chloroplast precursor (CS17) identical to 30S ribosomal protein S17, chloroplast precursor GB:P16180 [Arabidopsis thaliana]                      | 260165_at   | -1.4 |
| unknown protein similar to hypothetical protein GB:CAA10289 [Cicer arietinum]; supported by full-length cDNA: Ceres: 108086.                                                | 259272_at   | -1.4 |
| unknown protein similar to pop3 peptide GB:AAC26526 from [Populus balsamifera subsp. trichocarpa X Populus deltoides];supported by full-length cDNA: Ceres:8259.            | 258412_at   | -1.4 |
| unknown protein ;supported by full-length cDNA: Ceres:8259.                                                                                                                 | 258275_at   | -1.4 |
| unknown protein ;supported by full-length cDNA: Ceres:7192.                                                                                                                 | 258183_at   | -1.4 |
| protein phosphatase 2A regulatory subunit isoform B delta identical to GB:AAD02810 from [Arabidopsis thaliana]; supported by cDNA: gi_41414                                 | 258060_at   | -1.4 |
| MYB family transcription factor (hsr1), putative identical to myb-like protein GB:AJ007289 [Arabidopsis thaliana] (Plant J. 20 (1), 57-66 (1992))                           | 257140_at   | -1.4 |
| PREG-like protein, putative similar to PREG-like protein GB:AAC32127 from [Picea mariana]                                                                                   | 256894_at   | -1.4 |
| 30S ribosomal protein S20 contains Pfam profile: PF01649 ribosomal protein S20;supported by full-length cDNA: Ceres:24271.                                                  | 256855_at   | -1.4 |
| unknown protein ;supported by full-length cDNA: Ceres:14433.                                                                                                                | 256455_at   | -1.4 |
| pathogenesis-related group 5 protein, putative similar to pathogenesis-related group 5 protein GI:2749943 from [Brassica rapa]; supported by full-length cDNA: Ceres:14433. | 256125_at   | -1.4 |
| putative uroporphyrinogen decarboxylase ; supported by cDNA: gi_14334767_gb_AY035057.1_                                                                                     | 255826_at   | -1.4 |
| RING-H2 finger protein RHA1b ;supported by full-length cDNA: Ceres:37097.                                                                                                   | 254919_at   | -1.4 |
| putative pectinacetyltransferase protein pectinacetyltransferase precursor, Vigna radiata, PIR2:S68805;supported by full-length cDNA: Ceres:341                             | 254578_at   | -1.4 |
| photosystem II oxygen-evolving complex protein 3 - like photosystem II oxygen-evolving complex protein 3, Spinacia oleracea, PIR2:S0000                                     | 254398_at   | -1.4 |
| hypothetical protein                                                                                                                                                        | 254137_at   | -1.4 |
| Expressed protein ; supported by cDNA: gi_15028040_gb_AY045877.1_                                                                                                           | 253827_at   | -1.4 |
| pectinesterase - like protein pectinesterase, Prunus persica, X95991; supported by cDNA: gi_14190428_gb_AF378892.1_AF378892                                                 | 253372_at   | -1.4 |
| serine/proline-rich protein                                                                                                                                                 | 252615_at   | -1.4 |
| Histone H4 - like protein histone H4, Zea mays, PIR:HSZM4;supported by full-length cDNA: Ceres:22146.                                                                       | 252562_s_at | -1.4 |
| hypothetical protein                                                                                                                                                        | 252345_at   | -1.4 |
| putative protein GMFP7 isoprenylated protein, Glycine max., gb:AAD09515;supported by full-length cDNA: Ceres:250092.                                                        | 252296_at   | -1.4 |
| putative protein polyphosphoinositide binding protein Ssh2 - Glycine max, PIR:T05953; supported by cDNA: gi_16930482_gb_AF419595.1                                          | 252080_at   | -1.4 |
| putative protein photosystem II oxygen evolving complex protein 2 precursor (psbP), Fritillaria agrestis, EMBL:AF037458;supported by full-length cDNA: Ceres:19092.         | 251784_at   | -1.4 |
| glutaredoxin -like protein glutaredoxin, castor bean, PIR:S54825                                                                                                            | 251196_at   | -1.4 |
| 2-cys peroxiredoxin-like protein ;supported by full-length cDNA: Ceres:15640.                                                                                               | 250733_at   | -1.4 |
| putative protein predicted protein, Arabidopsis thaliana                                                                                                                    | 250563_at   | -1.4 |
| putative protein similar to unknown protein (pir T41692);supported by full-length cDNA: Ceres:31527.                                                                        | 250097_at   | -1.4 |
| plastid-specific ribosomal protein 6 precursor (Psrp-6) - like plastid-specific ribosomal protein 6 precursor (Psrp-6), Spinacia oleracea, EMBL:AF037458                    | 250058_at   | -1.4 |
| Expressed protein ; supported by full-length cDNA: Ceres: 19092.                                                                                                            | 249778_at   | -1.4 |
| unknown protein ;supported by full-length cDNA: Ceres:6393.                                                                                                                 | 249755_at   | -1.4 |
| putative protein contains similarity to bHLH DNA-binding protein;supported by full-length cDNA: Ceres:35890.                                                                | 248839_at   | -1.4 |
| small zinc finger-like protein ;supported by full-length cDNA: Ceres:33833.                                                                                                 | 248473_at   | -1.4 |
| putative protein similar to unknown protein (pir T05752);supported by full-length cDNA: Ceres:109272.                                                                       | 248164_at   | -1.4 |
| Expressed protein ; supported by full-length cDNA: Ceres: 17636.                                                                                                            | 247800_at   | -1.4 |
| putative protein various predicted proteins, Arabidopsis thaliana                                                                                                           | 247563_at   | -1.4 |
| 50S ribosomal protein L29 ; supported by full-length cDNA: Ceres: 16740.                                                                                                    | 247201_at   | -1.4 |
| putative protein predicted protein, Arabidopsis thaliana                                                                                                                    | 246584_at   | -1.4 |
| hypothetical protein predicted by genemark.hmm                                                                                                                              | 246408_at   | -1.4 |
| RP19 gene for chloroplast ribosomal protein CL9 ;supported by full-length cDNA: Ceres:13554.                                                                                | 246339_at   | -1.4 |
| putative protein                                                                                                                                                            | 246270_at   | -1.4 |
| hydroxymethylbilane synthase ;supported by full-length cDNA: Ceres:3051.                                                                                                    | 246033_at   | -1.4 |
| Expressed protein ; supported by full-length cDNA: Ceres: 5455.                                                                                                             | 245334_at   | -1.4 |
| AR781, similar to yeast pheromone receptor identical to GB:D88743, corrected a frameshift found in the original record (at 69530 bp), sequenced                             | 245041_at   | -1.4 |

|                                                                                                                                             |             |      |
|---------------------------------------------------------------------------------------------------------------------------------------------|-------------|------|
| auxin induced protein, putative similar to AUXIN-INDUCED PROTEIN X10A GB:P33080 from [Glycine max]                                          | 257460_at   | -1.4 |
| hypothetical protein predicted by genemark.hmm;supported by full-length cDNA: Ceres:117804.                                                 | 263738_at   | -1.4 |
| unknown protein                                                                                                                             | 267400_at   | -1.3 |
| putative ammonium transporter                                                                                                               | 267142_at   | -1.3 |
| expressed protein supported by cDNA: Ceres:16674; supported by cDNA: gi_13878170_gb_AF370348.1_AF370348                                     | 267038_at   | -1.3 |
| unknown protein                                                                                                                             | 266799_at   | -1.3 |
| similar to gibberellin-regulated proteins                                                                                                   | 266613_at   | -1.3 |
| unknown protein identical to GB:AAB82643supported by full-length cDNA: Ceres:17187.                                                         | 266123_at   | -1.3 |
| unknown protein ;supported by full-length cDNA: Ceres:1697.                                                                                 | 265716_at   | -1.3 |
| putative alanine acetyl transferase                                                                                                         | 265725_at   | -1.3 |
| putative purine-rich single-stranded DNA-binding protein ; supported by cDNA: gi_15450692_gb_AY052714.1_                                    | 265677_at   | -1.3 |
| unknown protein ;supported by full-length cDNA: Ceres:12246.                                                                                | 265593_s_at | -1.3 |
| unknown protein                                                                                                                             | 265317_at   | -1.3 |
| unknown protein ; supported by full-length cDNA: Ceres: 14111.                                                                              | 265281_at   | -1.3 |
| hypothetical protein                                                                                                                        | 265230_s_at | -1.3 |
| cytochrome b5, putative similar to cytochrome b5 GI:4240120 from [Arabidopsis thaliana]; supported by cDNA: gi_15146311_gb_AY04929          | 264926_at   | -1.3 |
| putative lipase Similar to nodulins and lipase; location of EST E6C2T7 , gb AA042309. similar to nodulins gj 3328240, gj 2129854 and other  | 264501_at   | -1.3 |
| unknown protein Location of EST gb T45589;supported by full-length cDNA: Ceres:145854.                                                      | 264523_at   | -1.3 |
| unknown protein similar to ESTs gb T42386, gb H36247, gb N38423, gb T21830, and gb AA585725; supported by cDNA: gi_14423427_gb              | 264445_at   | -1.3 |
| putative glutathione S-transferase TSI-1 similar to glutathione S-transferase (sp Q03666 GTX4_TOBAC); similar to EST gb H36275; support     | 264435_at   | -1.3 |
| unknown protein ESTs gb T04610, gb N38459, gb T45174, gb R30481 and gb N64971 come from this gene;supported by full-length cDNA:            | 264264_at   | -1.3 |
| En/Spm-like transposon protein related to En/Spm transposon family of maize;supported by full-length cDNA: Ceres:41214.                     | 263979_at   | -1.3 |
| unknown protein similar to unknown protein GB:AAD24850;supported by full-length cDNA: Ceres:3900.                                           | 263179_at   | -1.3 |
| putative lipase similar to gb X02844 lipase precursor from Staphylococcus hyicus. ESTs gb A1239406 and gb T76725 come from this gene        | 262786_at   | -1.3 |
| unknown protein location of EST TAT5A03; 5 end, gb Z26679                                                                                   | 262656_at   | -1.3 |
| Expressed protein ; supported by full-length cDNA: Ceres: 109156.                                                                           | 262558_at   | -1.3 |
| hypothetical protein Pfam                                                                                                                   | 262533_at   | -1.3 |
| virus resistance protein, putative similar to virus resistance protein GI:558886 from [Nicotiana glutinosa]                                 | 262382_at   | -1.3 |
| Expressed protein ; supported by full-length cDNA: Ceres: 102054.                                                                           | 262286_at   | -1.3 |
| ribosomal protein L18, putative similar to ribosomal protein L18 GI:3980238 from [Thermotoga maritima]                                      | 262235_at   | -1.3 |
| dirigent protein, putative similar to dirigent protein GI:6694693 from [ Forsythia intermedia]                                              | 261914_at   | -1.3 |
| unknown protein                                                                                                                             | 261782_at   | -1.3 |
| tubulin alpha-2/alpha-4 chain, putative identical to tubulin alpha-2/alpha-4 chain GB:P29510 from [Arabidopsis thaliana]; supported by cDNA | 261639_at   | -1.3 |
| defensin AMP1, putative similar to PIR:S66219 from [Clitoria ternatea]                                                                      | 261135_at   | -1.3 |
| unknown protein                                                                                                                             | 260635_at   | -1.3 |
| putative FKBP type peptidyl-prolyl cis-trans isomerase                                                                                      | 260542_at   | -1.3 |
| hypothetical protein similar to GB:AAB61488 [Arabidopsis thaliana];supported by full-length cDNA: Ceres:34864.                              | 260411_at   | -1.3 |
| unknown protein ; supported by cDNA: gi_15912212_gb_AY056384.1_                                                                             | 260371_at   | -1.3 |
| calmodulin-related protein similar to GB:P25070 from [Arabidopsis thaliana], contains Pfam profile: PF00036 EF hand (4 copies);supported    | 260135_at   | -1.3 |
| aquaporin, putative similar to delta tonoplast integral protein GI:1145697 [Arabidopsis thaliana]                                           | 259837_at   | -1.3 |
| blue copper protein, putative similar to GI:562778 from [Pisum sativum] (Thesis (1994) BIOLOGICAL SCIENCES, DURHAM UNIVERSITY)              | 259801_at   | -1.3 |
| unknown protein ; supported by full-length cDNA: Ceres: 13599.                                                                              | 259660_at   | -1.3 |
| unknown protein                                                                                                                             | 259325_at   | -1.3 |
| unknown protein similar to putative protein GB:CAB38214 [Arabidopsis thaliana];supported by full-length cDNA: Ceres:6052.                   | 258811_at   | -1.3 |
| putative RING zinc finger protein similar to RING-H2 zinc finger protein ATL6 GB:AAD33584 from [Arabidopsis thaliana];supported by full-le  | 258436_at   | -1.3 |
| subtilisin-like serine protease contains similarity to SBT1 GI:1771160 from [Lycopersicon esculentum];supported by full-length cDNA: Ceres: | 258368_at   | -1.3 |
| unknown protein ; supported by full-length cDNA: Ceres: 21882.                                                                              | 258249_s_at | -1.3 |
| putative chlorophyll A-B binding protein similar to chlorophyll A-B binding protein 151 precursor (LHCP) GB:P27518 from [Gossypium hirsutu  | 258239_at   | -1.3 |
| 50S ribosomal protein L15, chloroplast precursor identical to GB:P25873 from [Arabidopsis thaliana];supported by full-length cDNA: Ceres:   | 258076_at   | -1.3 |
| hypothetical protein similar to hypothetical protein GB:AAF01546 from [Arabidopsis thaliana]                                                | 257999_at   | -1.3 |
| hypothetical protein predicted by genemark.hmm;supported by full-length cDNA: Ceres:104278.                                                 | 257751_at   | -1.3 |
| blue copper protein, putative similar to uclacyanin I GB:AAC32038 from [Arabidopsis thaliana] (Protein Sci (1996) 5(11):2175-83);supportec  | 257151_at   | -1.3 |
| Sm protein, putative similar to GB:AAB62189 from [Homo sapiens], contains Pfam profile: PF01423 Sm protein;supported by full-length cDI     | 257001_at   | -1.3 |

|                                                                                                                                                    |           |      |
|----------------------------------------------------------------------------------------------------------------------------------------------------|-----------|------|
| Expressed protein ; supported by full-length cDNA: Ceres: 38257.                                                                                   | 256979_at | -1.3 |
| unknown protein                                                                                                                                    | 256698_at | -1.3 |
| unknown protein                                                                                                                                    | 256622_at | -1.3 |
| unknown protein                                                                                                                                    | 256433_at | -1.3 |
| RING zinc finger protein contains Pfam profile: PF00097 Zinc finger, C3HC4 type (RING finger)                                                      | 256446_at | -1.3 |
| unknown protein                                                                                                                                    | 256337_at | -1.3 |
| high mobility group protein (HMG1), putative similar to high mobility group protein (HMG1) GI:436423 from [Pisum sativum]                          | 256080_at | -1.3 |
| PSI type II chlorophyll a/b-binding protein, putative similar to PSI type II chlorophyll a/b-binding protein GI:541565 from [Arabidopsis thaliana] | 256015_at | -1.3 |
| unknown protein ;supported by full-length cDNA: Ceres:12461.                                                                                       | 255854_at | -1.3 |
| putative NAM (no apical meristem)-like protein ; supported by cDNA: gi_15294215_gb_AF410299.1_AF410299                                             | 255794_at | -1.3 |
| putative hypersensitive response protein similar to N. tabacum hin1, GenBank accession number Y07563;supported by full-length cDNA: t              | 255577_at | -1.3 |
| Expressed protein ; supported by full-length cDNA: Ceres: 11649.                                                                                   | 254761_at | -1.3 |
| putative protein ; supported by cDNA: gi_14596204_gb_AY042890.1_                                                                                   | 254705_at | -1.3 |
| putative protein glycine/proline-rich protein GPRP, Arabidopsis thaliana, PIR2:S65780; supported by full-length cDNA: Ceres: 8188.                 | 254559_at | -1.3 |
| RNA-binding protein RNP-T precursor ; supported by cDNA: gi_15294253_gb_AF410318.1_AF410318                                                        | 254126_at | -1.3 |
| putative protein pectinesterase - Citrus sinensis, PID:g2098705                                                                                    | 254110_at | -1.3 |
| putative protein LEDI-3 protein, Lithospermum erythrorhizon                                                                                        | 253909_at | -1.3 |
| amidophosphoribosyltransferase 2 precursor                                                                                                         | 253252_at | -1.3 |
| Expressed protein ; supported by full-length cDNA: Ceres: 17990.                                                                                   | 253045_at | -1.3 |
| putative protein                                                                                                                                   | 252603_at | -1.3 |
| putative protein putative hydrolyse - Arabidopsis thaliana, PID:g4191785;supported by full-length cDNA: Ceres:262295.                              | 252433_at | -1.3 |
| syntaxin-like protein synt4 ;supported by full-length cDNA: Ceres:37248.                                                                           | 252053_at | -1.3 |
| uracil phosphoribosyltransferase-like protein uracil phosphoribosyltransferase - Nicotiana tabacum, PIR:T03969;supported by full-length cD         | 251920_at | -1.3 |
| putative protein 24 kDa seed maturation protein, Glycine max., EMBL:AF004806                                                                       | 251903_at | -1.3 |
| ribosomal protein L17 -like protein ribosomal protein L17, chloroplast, Nicotiana tabacum, PIR:T01744;supported by full-length cDNA: Cere          | 251883_at | -1.3 |
| responce reactor 4 ; supported by cDNA: gi_3273201_dbj_AB010918.1_AB010918                                                                         | 251665_at | -1.3 |
| putative protein hypothetical protein 238 - Porphyra purpurea, PIR:S73123                                                                          | 251519_at | -1.3 |
| putative protein multisynthetase complex auxiliary component p43 - Cricetulus griseus, EMBL:AF021800;supported by full-length cDNA: Ce             | 251442_at | -1.3 |
| Expressed protein ; supported by full-length cDNA: Ceres: 17055.                                                                                   | 251446_at | -1.3 |
| mRNA binding protein precursor - like mRNA binding protein precursor (chloroplast protein), Lycopersicon esculentum, EMBL:AF106660; s              | 251157_at | -1.3 |
| putative protein predicted proteins, Arabidopsis thaliana;supported by full-length cDNA: Ceres:263168.                                             | 250398_at | -1.3 |
| putative protein                                                                                                                                   | 250075_at | -1.3 |
| putative protein similar to unknown protein (gb AAD25141.1);supported by full-length cDNA: Ceres:33455.                                            | 248419_at | -1.3 |
| putative protein similar to unknown protein (emb CAA71173.1)                                                                                       | 248322_at | -1.3 |
| putative protein similar to unknown protein (pir  S77462); supported by cDNA: gi_15081647_gb_AY048216.1_                                           | 248287_at | -1.3 |
| putative protein contains similarity to MYB family transcription factor                                                                            | 248246_at | -1.3 |
| unknown protein ;supported by full-length cDNA: Ceres:4309.                                                                                        | 248062_at | -1.3 |
| unknown protein                                                                                                                                    | 248050_at | -1.3 |
| putative protein non-consensus CG donor splice site at exon 1, GA donor splice site at exon 3, similar to unknown protein (pir T04268);sup         | 247933_at | -1.3 |
| putative protein similar to unknown protein (pir T04254); supported by cDNA: gi_13937150_gb_AF372929.1_AF372929                                    | 247946_at | -1.3 |
| TCH4 protein (gb AAA92363.1) ; supported by cDNA: gi_14194112_gb_AF367262.1_AF367262                                                               | 247925_at | -1.3 |
| copper transport protein                                                                                                                           | 247745_at | -1.3 |
| ethylene responsive element binding factor - like ethylene responsive element binding factor 5, Arabidopsis thaliana, SWISSPROT:ERF5_              | 247540_at | -1.3 |
| putative protein predicted proteins, Arabidopsis thaliana                                                                                          | 247394_at | -1.3 |
| putative protein predicted proteins, Arabidopsis thaliana; supported by cDNA: gi_13877822_gb_AF370174.1_AF370174                                   | 247407_at | -1.3 |
| putative protein strong similarity to unknown protein (emb CAB76911.1)                                                                             | 247362_at | -1.3 |
| unknown protein ; supported by full-length cDNA: Ceres: 25655.                                                                                     | 247213_at | -1.3 |
| histone H3 (sp P05203) ; supported by cDNA: gi_13926210_gb_AF370577.1_AF370577                                                                     | 247192_at | -1.3 |
| putative protein                                                                                                                                   | 246644_at | -1.3 |
| auxin-induced basic helix-loop-helix transcription factor, putative similar to auxin-induced basic helix-loop-helix transcription factor GI:57312  | 246398_at | -1.3 |
| putative protein ; supported by full-length cDNA: Ceres: 123997.                                                                                   | 246275_at | -1.3 |
| phospholipase - like protein various predicted phospholipase proteins;supported by full-length cDNA: Ceres:253499.                                 | 246041_at | -1.3 |
| hypothetical protein predicted by genemark.hmm;supported by full-length cDNA: Ceres:124269.                                                        | 245840_at | -1.3 |

|                                                                                                                                             |           |      |
|---------------------------------------------------------------------------------------------------------------------------------------------|-----------|------|
| endoxyloglucan transferase, putative similar to endoxyloglucan transferase GB:AAD45125 GI:5533313 from [Arabidopsis thaliana]; support      | 245794_at | -1.3 |
| hypothetical protein ;supported by full-length cDNA: Ceres:2505.                                                                            | 245388_at | -1.3 |
| membrane channel like protein ;supported by full-length cDNA: Ceres:99796.                                                                  | 245399_at | -1.3 |
| putative RNA-binding protein contains Procite RNP1 putative RNA-binding region, similar to GB:AAC33496; supported by cDNA: gi_1360!         | 257413_at | -1.3 |
| hypothetical protein predicted by genefinder and genscan                                                                                    | 260472_at | -1.3 |
| putative protein AtPP - Brassica napus, EMBL:AJ245479                                                                                       | 249539_at | -1.3 |
| hypothetical protein ; supported by full-length cDNA: Ceres: 26019.                                                                         | 245317_at | -1.3 |
| 30S ribosomal protein S5 ; supported by full-length cDNA: Ceres: 38063.                                                                     | 267435_at | -1.2 |
| 60S acidic ribosomal protein P0                                                                                                             | 267349_at | -1.2 |
| hypothetical protein predicted by genefinder                                                                                                | 267161_at | -1.2 |
| unknown protein                                                                                                                             | 267069_at | -1.2 |
| unknown protein                                                                                                                             | 266956_at | -1.2 |
| phytoeyanin identical to GB:U90428; supported by full-length cDNA: Ceres: 19760.                                                            | 266884_at | -1.2 |
| unknown protein ; supported by cDNA: gi_14517479_gb_AY039575.1_                                                                             | 266017_at | -1.2 |
| unknown protein ;supported by full-length cDNA: Ceres:19338.                                                                                | 265895_at | -1.2 |
| unknown protein                                                                                                                             | 265831_at | -1.2 |
| cysteine proteinase contains similarity to cysteine protease SPCP1 GI:13491750 from [Ipomoea batatas]                                       | 265665_at | -1.2 |
| unknown protein ;supported by full-length cDNA: Ceres:25812.                                                                                | 265057_at | -1.2 |
| putative glycosyl transferase similar to GB:AAC78704                                                                                        | 264857_at | -1.2 |
| hypothetical protein predicted by genemark.hmm;supported by full-length cDNA: Ceres:2118.                                                   | 264636_at | -1.2 |
| zinc finger protein ATZF1, putative identical to GB:BAA25989; supported by cDNA: gi_3123711_dbj_D89051.1_D89051                             | 264624_at | -1.2 |
| unknown protein predicted by genscan and grail;supported by full-length cDNA: Ceres:14105.                                                  | 264380_at | -1.2 |
| antigen receptor, putative similar to antigen receptor GI:3982955 from [Ginglymostoma cirratum];supported by full-length cDNA: Ceres:432!   | 264161_at | -1.2 |
| ethylene reponse factor-like AP2 domain transcription factor                                                                                | 264083_at | -1.2 |
| hypothetical protein predicted by genscan;supported by full-length cDNA: Ceres:10798.                                                       | 263535_at | -1.2 |
| nodulin-like protein similar to MtN21 GB:CAA75575 GI:2598575 from [Medicago truncatula] (Mol. Plant Microbe Interact. 9 (4), 233-242 (19    | 262951_at | -1.2 |
| unknown protein Location of est 136A23T7 (gb T45563); supported by full-length cDNA: Ceres: 28177.                                          | 262539_at | -1.2 |
| unknown protein EST gb T21171 comes from this gene                                                                                          | 262489_at | -1.2 |
| unknown protein                                                                                                                             | 262092_at | -1.2 |
| hypothetical protein predicted by genemark.hmm                                                                                              | 262010_at | -1.2 |
| thioredoxin h, putative similar to thioredoxin h GI:4928460 from [Hevea brasiliensis];supported by full-length cDNA: Ceres:2054.            | 261821_at | -1.2 |
| fatty acid elongase 3-ketoacyl-CoA synthase 1 identical to GB:AAC99312 GI:4091810 from [Arabidopsis thaliana]                               | 261570_at | -1.2 |
| Expressed protein ; supported by full-length cDNA: Ceres: 271765.                                                                           | 261318_at | -1.2 |
| hypothetical protein predicted by genscan+;supported by full-length cDNA: Ceres:250127.                                                     | 261265_at | -1.2 |
| unknown protein similar to unknown protein GB:AAB67633 from [Arabidopsis thaliana];supported by full-length cDNA: Ceres:18194.              | 260895_at | -1.2 |
| integral membrane protein, putative similar to GB:U43629 from [Beta vulgaris] (Plant Physiol. 110 110 (2), 511-520 (1996)); supported by cl | 260676_at | -1.2 |
| Cyclin, putative similar to GB:CAB77269 from [Pisum sativum]                                                                                | 260506_at | -1.2 |
| ferredoxin precursor isolog ;supported by full-length cDNA: Ceres:20637.                                                                    | 260481_at | -1.2 |
| unknown protein similar to unknown protein GB:AAC64296 [Arabidopsis thaliana];supported by full-length cDNA: Ceres:2571.                    | 260271_at | -1.2 |
| unknown protein                                                                                                                             | 260103_at | -1.2 |
| phosphatidylinositol synthase (PIS1) identical to phosphatidylinositol synthase (PIS1) GB:AJ000539;supported by full-length cDNA: Ceres:3   | 260006_at | -1.2 |
| unknown protein ;supported by full-length cDNA: Ceres:34166.                                                                                | 259856_at | -1.2 |
| unknown protein similar to GB:AAD41433;supported by full-length cDNA: Ceres:146543.                                                         | 259706_at | -1.2 |
| unknown protein ; supported by cDNA: gi_15028026_gb_AY045870.1_                                                                             | 259460_at | -1.2 |
| hypothetical protein predicted by genemark.hmm; supported by cDNA: gi_16648778_gb_AY058166.1_                                               | 259373_at | -1.2 |
| unknown protein ;supported by full-length cDNA: Ceres:9221.                                                                                 | 259106_at | -1.2 |
| unknown protein similar to hin1 GB:CAA68848 [Nicotiana tabacum]; supported by cDNA: gi_9502173_gb_AF264698.1_AF264698                       | 259071_at | -1.2 |
| unknown protein Pfam HMM hit: FKBP-type peptidyl-prolyl cis-trans isomerases                                                                | 258929_at | -1.2 |
| unknown protein ;supported by full-length cDNA: Ceres:27471.                                                                                | 258641_at | -1.2 |
| unknown protein ;supported by full-length cDNA: Ceres:35949.                                                                                | 258608_at | -1.2 |
| unknown protein ; supported by cDNA: gi_15010765_gb_AY045684.1_                                                                             | 257894_at | -1.2 |
| polygalacturonase, putative similar to endopolygalacturonase GB:225933 from [Lycopersicon esculentum];supported by full-length cDNA: C      | 257651_at | -1.2 |
| hypothetical protein predicted by genscan+;supported by full-length cDNA: Ceres:35773.                                                      | 257600_at | -1.2 |

|                                                                                                                                             |             |      |
|---------------------------------------------------------------------------------------------------------------------------------------------|-------------|------|
| hypothetical protein contains Pfam profile: PF01657 Domain of unknown function; supported by cDNA: gi_14334417_gb_AY034900.1_               | 257264_at   | -1.2 |
| peroxidase, putative similar to peroxidase ATP26a GB:CAA72487 GI:1890317 [Arabidopsis thaliana]; supported by cDNA: gi_14334599_gt          | 256578_at   | -1.2 |
| Expressed protein ; supported by full-length cDNA: Ceres: 31945.                                                                            | 256159_at   | -1.2 |
| UDP-glucose glucosyltransferase, putative similar to UDP-glucose glucosyltransferase GI:453245 from [Manihot esculenta];supported by fu     | 256058_at   | -1.2 |
| ribosomal protein, putative similar to ribosomal protein L35a GI:57118 from [Rattus norvegicus]; supported by full-length cDNA: Ceres: 277i | 256065_at   | -1.2 |
| hypothetical protein                                                                                                                        | 255978_at   | -1.2 |
| hypothetical protein predicted by genscan+                                                                                                  | 255880_at   | -1.2 |
| unknown protein contains similarity to chlorophyllase GI:7415999 from [Chenopodium album]; supported by full-length cDNA: Ceres: 31589.     | 255786_at   | -1.2 |
| acidic ribosomal protein p1 similar to acidic ribosomal protein p1;supported by full-length cDNA: Ceres:26442.                              | 255657_at   | -1.2 |
| Expressed protein ; supported by full-length cDNA: Ceres: 11036.                                                                            | 255659_at   | -1.2 |
| putative DNA-binding protein ; supported by cDNA: gi_15028172_gb_AY045909.1_                                                                | 255568_at   | -1.2 |
| hypothetical protein similar to pectinesterase                                                                                              | 255524_at   | -1.2 |
| F-box protein GRR1-like protein 1, AtFBL18 almost identical to GRR1-like protein 1 GI:12658970 from [Arabidopsis thaliana]                  | 255417_at   | -1.2 |
| putative protein                                                                                                                            | 255035_at   | -1.2 |
| H+-transporting ATP synthase-like protein H+-transporting ATP synthase (EC 3.6.1.34) delta chain precursor, chloroplast - Nicotiana tabaci  | 255046_at   | -1.2 |
| pectinesterase like protein pectinesterase, Lycopersicon esculentum, PATX:E312172                                                           | 254363_at   | -1.2 |
| xyloglucan endo-1,4-beta-D-glucanase precursor ;supported by full-length cDNA: Ceres:19156.                                                 | 253666_at   | -1.2 |
| hypothetical protein                                                                                                                        | 253510_at   | -1.2 |
| Expressed protein ; supported by full-length cDNA: Ceres: 39326.                                                                            | 253384_at   | -1.2 |
| putative protein hydroxyproline-rich glycoprotein precursor, Nicotiana tabacum, PIR2:S06733; supported by cDNA: gi_15724315_gb_AF41;        | 253284_at   | -1.2 |
| ras-related small GTP-binding protein ras-related small GTP-binding protein Rho1Ps, garden pea, Pir2:A47525;supported by full-length cDI    | 253118_at   | -1.2 |
| putative protein ;supported by full-length cDNA: Ceres:37341.                                                                               | 252876_at   | -1.2 |
| hypothetical protein ;supported by full-length cDNA: Ceres:123060.                                                                          | 252852_at   | -1.2 |
| hypothetical protein                                                                                                                        | 252612_at   | -1.2 |
| histone H2B ;supported by full-length cDNA: Ceres:32930.                                                                                    | 252561_at   | -1.2 |
| putative protein several oxidases, mainly gibberellin 20-oxidases                                                                           | 252529_at   | -1.2 |
| putative protein DCL PROTEIN, CHLOROPLAST PRECURSOR (DEFECTIVE CHLOROPLASTS AND LEAVES PROTEIN) - Lycopersicon                              | 252481_at   | -1.2 |
| putative protein pectinesterase homolog - Pinus radiata,PIR2:T08112                                                                         | 252437_at   | -1.2 |
| putative protein bundle sheath defective protein 2 - Zea mays, EMBL:AF126742; supported by cDNA: gi_13877966_gb_AF370246.1_AF37             | 252409_at   | -1.2 |
| R2R3-MYB transcription factor ; supported by cDNA: gi_15983427_gb_AF424588.1_AF424588                                                       | 252193_at   | -1.2 |
| putative protein predicted protein, Arabidopsis thaliana                                                                                    | 252204_at   | -1.2 |
| putative protein hypothetical protein At2g46330 - Arabidopsis thaliana, EMBL:AC006526;supported by full-length cDNA: Ceres:11394.           | 251281_at   | -1.2 |
| putative protein polygalacturonase - Lycopersicon esculentum, EMBL:AF118567; supported by cDNA: gi_13358184_gb_AF324992.2_AF3;              | 251261_at   | -1.2 |
| cytochrome c oxidase subunit 5c-like protein cytochrome c oxidase subunit 5c - Oryza sativa, EMBL:AB027123;supported by full-length cDI     | 251220_at   | -1.2 |
| one helix protein (OHP) ;supported by full-length cDNA: Ceres:16704.                                                                        | 251031_at   | -1.2 |
| putative protein ;supported by full-length cDNA: Ceres:3248.                                                                                | 250924_at   | -1.2 |
| putative protein prenylated rab acceptor 1 - Homo sapiens, EMBL:AF112202;supported by full-length cDNA: Ceres:22460.                        | 250663_at   | -1.2 |
| putative protein contains similarity to I-box binding factor                                                                                | 250524_at   | -1.2 |
| histone H3 - like protein histone H3, Arabidopsis thaliana, PIR:S06250                                                                      | 250433_at   | -1.2 |
| putative protein predicted proteins in castor bean, Arabidopsis thaliana and alfalfa.; supported by full-length cDNA: Ceres: 25522.         | 250366_at   | -1.2 |
| 24-sterol C-methyltransferase ; supported by cDNA: gi_11066104_gb_AF195648.1_AF195648                                                       | 250254_at   | -1.2 |
| putative protein various predicted proteins, Arabidopsis thaliana                                                                           | 250160_at   | -1.2 |
| putative protein similar to unknown protein (sp)P50027;supported by full-length cDNA: Ceres:17002.                                          | 250079_at   | -1.2 |
| putative protein PGPD14 - Petunia x hybrida, EMBL:AF049930                                                                                  | 250000_at   | -1.2 |
| putative protein glycine-rich protein GRP22, rape, PIR:S31415                                                                               | 249969_at   | -1.2 |
| Expressed protein ; supported by full-length cDNA: Ceres: 32450.                                                                            | 249719_at   | -1.2 |
| putative protein predicted proteins, Arabidopsis thaliana;supported by full-length cDNA: Ceres:249321.                                      | 249422_at   | -1.2 |
| putative protein predicted proteins, Arabidopsis thaliana                                                                                   | 249382_at   | -1.2 |
| putative protein similar to unknown protein (dbj)BAA92898.1);supported by full-length cDNA: Ceres:97314.                                    | 249230_at   | -1.2 |
| putative protein similar to unknown protein (pir)IT04427)                                                                                   | 248943_s_at | -1.2 |
| putative protein similar to unknown protein (pir)IT04426);supported by full-length cDNA: Ceres:27099.                                       | 248951_at   | -1.2 |
| 60S acidic ribosomal protein P1-like protein ;supported by full-length cDNA: Ceres:14401.                                                   | 248768_at   | -1.2 |
| unknown protein                                                                                                                             | 248387_at   | -1.2 |

|                                                                                                                                                |           |      |
|------------------------------------------------------------------------------------------------------------------------------------------------|-----------|------|
| histone H2A (gb AAF64418.1) ; supported by full-length cDNA: Ceres: 4875.                                                                      | 248175_at | -1.2 |
| unknown protein                                                                                                                                | 247878_at | -1.2 |
| structural protein - like glycine-rich cell wall structural protein 1 precursor, Oryza sativa, PIR:KNRZG1;supported by full-length cDNA: Ceres | 247541_at | -1.2 |
| expressed protein similar to unknown protein (gb AAF03448.1); supported by full-length cDNA: Ceres: 97900.                                     | 247258_at | -1.2 |
| unknown protein ; supported by full-length cDNA: Ceres: 20274.                                                                                 | 247211_at | -1.2 |
| unknown protein ;supported by full-length cDNA: Ceres:25419.                                                                                   | 247149_at | -1.2 |
| unknown protein                                                                                                                                | 246989_at | -1.2 |
| putative protein hypothetical protein T20O10.160 - Arabidopsis thaliana, EMBL:AL163816                                                         | 246553_at | -1.2 |
| putative protein unknown protein F14P3.18 - Arabidopsis thaliana, EMBL:AC009755                                                                | 246562_at | -1.2 |
| unknown protein                                                                                                                                | 246321_at | -1.2 |
| transcriptional co-activator-like protein putative transcriptional co-activator (KIWI) - Arabidopsis thaliana, EMBL:AF053302                   | 245930_at | -1.2 |
| RNA-binding glycine-rich protein, putative similar to RNA-binding glycine-rich protein (RGP-1a) GI:436789 from [Nicotiana sylvestris]          | 245778_at | -1.2 |
| hypothetical protein predicted by genemark.hmm;supported by full-length cDNA: Ceres:20991.                                                     | 245666_at | -1.2 |
| Expressed protein ; supported by full-length cDNA: Ceres: 21980.                                                                               | 245642_at | -1.2 |
| CCAAT-binding transcription factor subunit A(CBF-A)                                                                                            | 245592_at | -1.2 |
| cysteine proteinase inhibitor like protein ; supported by full-length cDNA: Ceres: 31946.                                                      | 245323_at | -1.2 |
| putative protein contains EST gb:T4504800                                                                                                      | 245229_at | -1.2 |
| unknown protein predicted by genscan                                                                                                           | 245165_at | -1.2 |
| hypothetical protein                                                                                                                           | 244965_at | -1.2 |
| hypothetical protein predicted by genemark                                                                                                     | 257543_at | -1.2 |
| disease resistance protein, putative similar to disease resistance protein GB:AAC78591 GI:3894383 [Lycopersicon esculentum]                    | 256620_at | -1.2 |
| putative LIM-domain protein                                                                                                                    | 267355_at | -1.1 |
| similar to cold acclimation protein WCOR413 [Triticum aestivum]                                                                                | 267288_at | -1.1 |
| hypothetical protein predicted by genefinder                                                                                                   | 266899_at | -1.1 |
| unknown protein ; supported by cDNA: gi_14423465_gb_AF386970.1_AF386970                                                                        | 266887_at | -1.1 |
| hypothetical protein predicted by genscan                                                                                                      | 266893_at | -1.1 |
| putative chloroplast RNA binding protein precursor ; supported by cDNA: gi_14596022_gb_AY042799.1_                                             | 266642_at | -1.1 |
| unknown protein ; supported by cDNA: gi_15912210_gb_AY056383.1_                                                                                | 266479_at | -1.1 |
| unknown protein ; supported by cDNA: gi_14334561_gb_AY035185.1_                                                                                | 266329_at | -1.1 |
| putative rac GTPase activating protein                                                                                                         | 266324_at | -1.1 |
| putative tropinone reductase ; supported by cDNA: gi_14334839_gb_AY035093.1_                                                                   | 266265_at | -1.1 |
| histone H4 identical to GB:M17133 and GB:M17132;supported by full-length cDNA: Ceres:32642.                                                    | 266226_at | -1.1 |
| putative adenylate kinase ;supported by full-length cDNA: Ceres:15831.                                                                         | 265958_at | -1.1 |
| putative cytidine deaminase ;supported by full-length cDNA: Ceres:152285.                                                                      | 265943_at | -1.1 |
| putative fatty acid elongase                                                                                                                   | 265918_at | -1.1 |
| putative RNA-binding glycine rich protein (RGP-2) ;supported by full-length cDNA: Ceres:18569.                                                 | 265641_at | -1.1 |
| unknown protein ; supported by full-length cDNA: Ceres: 25575.                                                                                 | 265459_at | -1.1 |
| auxin-regulated protein (IAA8) ;supported by full-length cDNA: Ceres:37274.                                                                    | 265319_at | -1.1 |
| 50S ribosomal protein L3 ;supported by full-length cDNA: Ceres:142861.                                                                         | 265247_at | -1.1 |
| unknown protein ; supported by full-length cDNA: Ceres: 12055.                                                                                 | 265149_at | -1.1 |
| hypothetical protein predicted by genefinder                                                                                                   | 265083_at | -1.1 |
| unknown protein weak similarity to C3HC4 zinc finger;supported by full-length cDNA: Ceres:156298.                                              | 265023_at | -1.1 |
| hypothetical protein contains similarity to MHC class II antigen GI:9502037 from [Aotus nancymae];supported by full-length cDNA: Ceres:1       | 265001_at | -1.1 |
| unknown protein similar to gb T45484, emb Z30724, and emb Z30531                                                                               | 264824_at | -1.1 |
| unknown protein similar to ESTs gb AA605440 and gb H37232;supported by full-length cDNA: Ceres:30716.                                          | 264834_at | -1.1 |
| Expressed protein ; supported by full-length cDNA: Ceres: 17126.                                                                               | 264725_at | -1.1 |
| putative chloroplast 50S ribosomal protein, L6 Similar to Mycobacterium RlpF (gb Z84395). ESTs gb T75785,gb R30580,gb T04698 come f            | 264575_at | -1.1 |
| Expressed protein ; supported by full-length cDNA: Ceres: 2681.                                                                                | 264096_at | -1.1 |
| putative DOF zinc finger protein ;supported by full-length cDNA: Ceres:16423.                                                                  | 264056_at | -1.1 |
| Expressed protein ; supported by full-length cDNA: Ceres: 38277.                                                                               | 264004_at | -1.1 |
| Expressed protein ; supported by full-length cDNA: Ceres: 15689.                                                                               | 263712_at | -1.1 |
| putative protein kinase C inhibitor (Zinc-binding protein) Similar to gb Z29643 protein kinase C inhibitor (PKCI) from Zea mays and a membe    | 263701_at | -1.1 |
| unknown protein                                                                                                                                | 263515_at | -1.1 |

|                                                                                                                                                 |             |      |
|-------------------------------------------------------------------------------------------------------------------------------------------------|-------------|------|
| putative glutathione peroxidase ;supported by full-length cDNA: Ceres:25550.                                                                    | 263426_at   | -1.1 |
| 60S ribosomal protein L14 ;supported by full-length cDNA: Ceres:15198.                                                                          | 263372_at   | -1.1 |
| putative anthranilate N-hydroxycinnamoyl/benzoyltransferase ;supported by full-length cDNA: Ceres:105546.                                       | 263382_at   | -1.1 |
| unknown protein Belongs to PF00583 Acetyltransferase (GNAT) family; supported by full-length cDNA: Ceres: 10117.                                | 263113_at   | -1.1 |
| unknown protein EST gb F13926 comes from this gene;supported by full-length cDNA: Ceres:21943.                                                  | 262791_at   | -1.1 |
| unknown protein location of ESTs 144D22XP 3 , gb AA404877 and 144D22T7, gb T75757;supported by full-length cDNA: Ceres:5665.                    | 262612_at   | -1.1 |
| unknown protein similar to hypothetical protein GB:AAF24587 GI:6692122 from [Arabidopsis thaliana]; supported by cDNA: gi_16604307_gi           | 262559_at   | -1.1 |
| lysine and histidine specific transporter, putative similar to lysine and histidine specific transporter GI:2576361 from [Arabidopsis thaliana] | 262434_at   | -1.1 |
| unknown protein ;supported by full-length cDNA: Ceres:95546.                                                                                    | 262396_at   | -1.1 |
| hypothetical protein similar to hypothetical protein GI:9294146 from [Arabidopsis thaliana]                                                     | 262236_at   | -1.1 |
| unknown protein                                                                                                                                 | 262245_at   | -1.1 |
| AP2 domain containing protein, putative similar to AP2 domain containing protein RAP2.1 GI:2281627 from [Arabidopsis thaliana]                  | 262211_at   | -1.1 |
| ubiquitin-fusion protein, putative similar to ubiquitin-fusion protein GI:9725 from [Manduca sexta];supported by full-length cDNA: Ceres:346f   | 262196_at   | -1.1 |
| hypothetical protein predicted by genemark.hmm:supported by full-length cDNA: Ceres:2030.                                                       | 262159_at   | -1.1 |
| adenine phosphoribosyltransferase almost identical to adenine phosphoribosyltransferase GI:1402894 from [Arabidopsis thaliana]                  | 262039_at   | -1.1 |
| unknown protein similar to putative DNA-binding protein GI:6714399 from [Arabidopsis thaliana];supported by full-length cDNA: Ceres:9234        | 261942_at   | -1.1 |
| unknown protein ; supported by full-length cDNA: Ceres: 32430.                                                                                  | 261791_at   | -1.1 |
| pectinesterase, putative similar to pectinesterase GI:1944574 from [Lycopersicon esculentum]; supported by cDNA: gi_15982770_gb_AY0f            | 261728_at   | -1.1 |
| unknown protein contains Pfam profile: PF00255 glutathione peroxidases;supported by full-length cDNA: Ceres:30238.                              | 261530_at   | -1.1 |
| histone H2B identical to GB:CAA73156 from [Arabidopsis thaliana] (Plant Physiol. 115 (4), 1385-1395 (1997));supported by full-length cDN.       | 261411_at   | -1.1 |
| Expressed protein ; supported by full-length cDNA: Ceres: 21406.                                                                                | 261254_at   | -1.1 |
| unknown protein ; supported by cDNA: gi_15028364_gb_AY045985.1_                                                                                 | 261019_at   | -1.1 |
| mitochondrial NAD-dependent malate dehydrogenase identical to mitochondrial NAD-dependent malate dehydrogenase GI:3929649 from [f               | 260615_at   | -1.1 |
| 60S ribosomal protein L38                                                                                                                       | 260538_at   | -1.1 |
| unknown protein similar to hypothetical protein GB:AAD12705 [Arabidopsis thaliana];supported by full-length cDNA: Ceres:40506.                  | 260179_at   | -1.1 |
| hypothetical protein                                                                                                                            | 260051_at   | -1.1 |
| unknown protein ; supported by full-length cDNA: Ceres: 14237.                                                                                  | 259909_at   | -1.1 |
| hypothetical protein ;supported by full-length cDNA: Ceres:19640.                                                                               | 259863_at   | -1.1 |
| thylakoid-bound ascorbate peroxidase identical to thylakoid-bound ascorbate peroxidase GB:CAA67426 [Arabidopsis thaliana];supported by          | 259707_at   | -1.1 |
| putative serine/threonine kinase ; supported by cDNA: gi_15010571_gb_AY045587.1_                                                                | 259538_at   | -1.1 |
| unknown protein contains similarity to copper zinc superoxide dismutase GI:5689611 from (Arabidopsis thaliana); supported by cDNA: gi_1f        | 259511_at   | -1.1 |
| unknown protein                                                                                                                                 | 259434_at   | -1.1 |
| unknown protein similar to unknown protein GB:AAC62613 [Arabidopsis thaliana]; supported by cDNA: gi_14532567_gb_AY039908.1_                    | 259018_at   | -1.1 |
| putative dehydrogenase contains Pfam profiles: PF00106 short chain dehydrogenase, PF00678 short chain dehydrogenase reductase C-te              | 258976_at   | -1.1 |
| germin-like protein similar to germin type 2 GB:S71254 [Arabidopsis thaliana];supported by full-length cDNA: Ceres:19265.                       | 258938_at   | -1.1 |
| putative disease resistance protein similar to disease resistance protein RPP1-WsC GB:AAC72979 [Arabidopsis thaliana]; supported by cDI         | 258537_at   | -1.1 |
| unknown protein ;supported by full-length cDNA: Ceres:4861.                                                                                     | 258480_at   | -1.1 |
| photosystem I subunit VI precursor identical to GB:CAB52749 from [Arabidopsis thaliana];supported by full-length cDNA: Ceres:9633.              | 258285_at   | -1.1 |
| putative 2Fe-2S iron-sulfur cluster protein contains Pfam profile: PF00111 2Fe-2S iron-sulfur cluster binding domains; supported by cDNA: c     | 258055_at   | -1.1 |
| hypothetical protein predicted genemark;supported by full-length cDNA: Ceres:255040.                                                            | 258021_at   | -1.1 |
| unknown protein ; supported by full-length cDNA: Ceres: 105122.                                                                                 | 257300_at   | -1.1 |
| NADPH:quinone oxidoreductase (NQR) nearly identical to NADPH:quinone oxidoreductase (NQR) GB:AF145234 [Arabidopsis thaliana]; su                | 257228_at   | -1.1 |
| unknown protein ; supported by full-length cDNA: Ceres: 5176.                                                                                   | 257171_at   | -1.1 |
| hypothetical protein predicted by genscan                                                                                                       | 256427_at   | -1.1 |
| unknown protein                                                                                                                                 | 256396_at   | -1.1 |
| hypothetical protein ; supported by full-length cDNA: Ceres: 107260.                                                                            | 256383_at   | -1.1 |
| unknown protein ;supported by full-length cDNA: Ceres:19056.                                                                                    | 256215_at   | -1.1 |
| phosphoglycerate kinase, putative similar to phosphoglycerate kinase [Nicotiana tabacum] GI:1161600; supported by cDNA: gi_15810504_            | 256228_at   | -1.1 |
| sterol-C-methyltransferase identical to sterol-C-methyltransferase GI:1061040 from [Arabidopsis thaliana];supported by full-length cDNA: Ce     | 255885_at   | -1.1 |
| unknown protein ;supported by full-length cDNA: Ceres:108615.                                                                                   | 255908_s_at | -1.1 |
| hypothetical protein predicted by genefinder and genscan;supported by full-length cDNA: Ceres:15024.                                            | 255824_at   | -1.1 |
| 60S ribosomal protein L23 ;supported by full-length cDNA: Ceres:28563.                                                                          | 255789_at   | -1.1 |
| plastid protein identical to GB:Z86094; supported by full-length cDNA: Ceres: 8717.                                                             | 255791_at   | -1.1 |

|                                                                                                                                            |             |      |
|--------------------------------------------------------------------------------------------------------------------------------------------|-------------|------|
| putative protein RING-H2 finger protein RHA1a, Arabidopsis thaliana, AF078683                                                              | 255802_s_at | -1.1 |
| unknown protein similar to beta-1,3-glucanase-like protein GI:9758115 from [Arabidopsis thaliana]; supported by full-length cDNA: Ceres:32 | 255779_at   | -1.1 |
| putative transcription factor ; supported by cDNA: gi_15450989_gb_AY054575.1_                                                              | 255538_at   | -1.1 |
| putative protein                                                                                                                           | 255134_at   | -1.1 |
| ribosomal protein L13a like protein ribosomal protein L13a -Lupinus luteus, PID:e1237871; supported by cDNA: gi_15529277_gb_AY05226        | 254763_at   | -1.1 |
| putative protein Cyclic beta-1-3-glucan synthase, Bradyrhizobium japonicum, AF047687                                                       | 254773_at   | -1.1 |
| HhoA protease precursor, putative identical to putative protease HhoA precursor [Arabidopsis thaliana] SP:Q9SEL7 GI:6690272 (unpublish     | 254669_at   | -1.1 |
| fatty acid hydroxylase - like protein fatty acid hydroxylase Fah1p, Arabidopsis thaliana, PID:g2736147; supported by cDNA: gi_14994242_g   | 254448_at   | -1.1 |
| Expressed protein ; supported by full-length cDNA: Ceres: 23587.                                                                           | 254429_at   | -1.1 |
| Ribosomal protein L7Ae - like NHP2/RS6 FAMILY PROTEIN, Homo sapiens, PID:g4826860                                                          | 254355_at   | -1.1 |
| extensin - like protein hybrid proline-rich protein, Zea mays, PIR2:JQ1663                                                                 | 254314_at   | -1.1 |
| predicted protein predicted protein ERG25, Saccharomyces cerevisiae, PIR2:S64354                                                           | 254333_at   | -1.1 |
| putative protein extensin, Catharanthus roseus, D86853                                                                                     | 254093_at   | -1.1 |
| putative acidic ribosomal protein acidic ribosomal protein P3a - maize, PIR2:T02037                                                        | 254030_at   | -1.1 |
| Expressed protein ; supported by cDNA: gi_16612239_gb_AF439821.1_AF439821                                                                  | 253973_at   | -1.1 |
| putative protein ; supported by cDNA: gi_15810482_gb_AY056280.1_                                                                           | 253925_at   | -1.1 |
| putative protein ; supported by full-length cDNA: Ceres:10077.                                                                             | 253814_at   | -1.1 |
| putative protein ; supported by full-length cDNA: Ceres: 2891.                                                                             | 253670_at   | -1.1 |
| putative protein ; supported by full-length cDNA: Ceres:2508.                                                                              | 253440_at   | -1.1 |
| putative protein various predicted proteins; supported by full-length cDNA: Ceres: 17912.                                                  | 253233_at   | -1.1 |
| vacuolar H+-transporting ATPase 16K chain ; supported by full-length cDNA: Ceres:24998.                                                    | 253200_at   | -1.1 |
| putative protein AP2 domain containing protein RAP2.4, Arabidopsis thaliana                                                                | 252859_at   | -1.1 |
| putative protein CLATHRIN COAT ASSEMBLY PROTEIN AP180 - Mus musculus, SWISSPROT:Q61548; supported by full-length cDNA: C                   | 252851_at   | -1.1 |
| putative protein                                                                                                                           | 252661_at   | -1.1 |
| putative chloroplast prephenate dehydratase similar to bacterial PheA gene products                                                        | 252652_at   | -1.1 |
| putative protein CDP-alcohol phosphatidyltransferase - Schizosaccharomyces pombe, EMBL:CAB16578                                            | 252540_at   | -1.1 |
| hypothetical protein ; supported by cDNA: gi_13605735_gb_AF361849.1_AF361849                                                               | 252170_at   | -1.1 |
| putative LEA protein Picea glauca late embryogenesis abundant protein (EMB8), PID:g1350545; supported by full-length cDNA: Ceres:367C      | 252132_at   | -1.1 |
| hypothetical protein hypothetical protein - Arabidopsis thaliana chromosome 4 AP2 contig, PID:e353223; supported by full-length cDNA: Cei  | 252133_at   | -1.1 |
| 40S ribosomal protein S21 homolog ribosomal protein S21, cytosolic - Oryza sativa, PIR:S38357; supported by full-length cDNA: Ceres:268    | 251921_at   | -1.1 |
| pectate lyase - like protein pectate lyase, Musa acuminata, X92943                                                                         | 251864_at   | -1.1 |
| putative protein predicted pectate-lyase, Arabidopsis thaliana, PIR:T06728                                                                 | 251810_at   | -1.1 |
| synaptic glycoprotein SC2-like protein synaptic glycoprotein SC2 spliced variant, Homo sapiens, EMBL:AF038958; supported by full-length    | 251796_at   | -1.1 |
| protein kinase C inhibitor-like protein protein kinase C inhibitor - Zea mays, PIR:S45368; supported by full-length cDNA: Ceres: 28847.    | 251707_at   | -1.1 |
| E2 ubiquitin-conjugating-like enzyme Ahus5 ; supported by cDNA: gi_14596100_gb_AY042838.1_                                                 | 251561_at   | -1.1 |
| beta-glucosidase-like protein several beta-glucosidases - different species; supported by cDNA: gi_15028300_gb_AY045953.1_                 | 251427_at   | -1.1 |
| putative protein hypothetical proteins - Arabidopsis thaliana                                                                              | 251241_s_at | -1.1 |
| putative protein chloroplast ribosome recycling factor protein - Spinacia oleracea, EMBL:AJ133751; supported by cDNA: gi_13926251_gb_      | 251172_at   | -1.1 |
| putative protein several protein kinases - different species                                                                               | 251068_at   | -1.1 |
| RIBOSOMAL PROTEIN S28- like ribosomal protein S28, Arabidopsis thaliana, EMBL:ATRP28A                                                      | 250895_at   | -1.1 |
| unknown protein                                                                                                                            | 250857_at   | -1.1 |
| serine-type carboxypeptidase II-like protein carboxypeptidase D - Triticum aestivum, PIR:A29639; supported by cDNA: gi_13877962_gb_Al      | 250517_at   | -1.1 |
| 14-3-3 protein GF14lambda (grf6/AFT1) identical to 14-3-3 GF14lambda GI:1345595 from [Arabidopsis thaliana]; supported by cDNA: gi_14      | 250439_at   | -1.1 |
| putative protein predicted proteins, Arabidopsis thaliana                                                                                  | 250353_at   | -1.1 |
| 2-oxoglutarate/malate translocator precursor -like protein 2-oxoglutarate/malate translocator precursor, spinach, SWISSPROT:SOT1_SPIO      | 250278_at   | -1.1 |
| expressed protein contains similarity to ABC transporter, ATP-binding protein; supported by full-length cDNA: Ceres:151943.                | 250198_at   | -1.1 |
| putative protein predicted protein, Arabidopsis thaliana                                                                                   | 250168_at   | -1.1 |
| putative protein proline-rich protein APG, Arabidopsis thaliana, PIR:S21961                                                                | 250043_at   | -1.1 |
| putative protein similar to unknown protein (gb)AAF32471.1)                                                                                | 249659_s_at | -1.1 |
| putative protein similar to unknown protein (gb AAF03445.1)                                                                                | 249332_at   | -1.1 |
| RING zinc finger protein-like ; supported by full-length cDNA: Ceres:207148.                                                               | 249306_at   | -1.1 |
| auxin-induced protein AUX2-11 (sp P33077)                                                                                                  | 249109_at   | -1.1 |
| unknown protein ; supported by full-length cDNA: Ceres:16944.                                                                              | 249120_at   | -1.1 |



|                                                                                                                                        |             |      |
|----------------------------------------------------------------------------------------------------------------------------------------|-------------|------|
| ethylene responsive element binding factor 5 (ATERF5) (sp O80341) ; supported by cDNA: gi_14326511_gb_AF385709.1_AF385709              | 248799_at   | -1.1 |
| putative protein similar to unknown protein (pir T04431);supported by full-length cDNA: Ceres:26264.                                   | 248329_at   | -1.1 |
| putative protein strong similarity to unknown protein (pir T05748); supported by cDNA: gi_15010657_gb_AY045630.1_                      | 248177_at   | -1.1 |
| putative protein similar to unknown protein (gb AAC83072.1)                                                                            | 248004_at   | -1.1 |
| Expressed protein ; supported by full-length cDNA: Ceres: 39314.                                                                       | 247899_at   | -1.1 |
| porin-like protein ;supported by full-length cDNA: Ceres:23726.                                                                        | 247923_at   | -1.1 |
| Expressed protein ; supported by full-length cDNA: Ceres: 267411.                                                                      | 247882_at   | -1.1 |
| similar to unknown protein (sp P72777)                                                                                                 | 247862_at   | -1.1 |
| arabinogalactan protein - like arabinogalactan protein Pop14A9, Populus alba x Populus tremula, EMBL:AF183809;supported by full-length | 247638_at   | -1.1 |
| 40S ribosomal protein S28 (sp P34789) ;supported by full-length cDNA: Ceres:36501.                                                     | 247267_at   | -1.1 |
| putative protein strong similarity to unknown protein (emb CAB89350.1)                                                                 | 247240_at   | -1.1 |
| unknown protein ; supported by cDNA: gi_13877834_gb_AF370180.1_AF370180                                                                | 247177_at   | -1.1 |
| putative protein similar to unknown protein (pir T08445);supported by full-length cDNA: Ceres:11651.                                   | 246952_at   | -1.1 |
| acetyltransferase-like protein Glucosamine-6-phosphate acetyltransferase EMeg32 protein - Mus musculus, EMBL:AJ001006                  | 246518_at   | -1.1 |
| dirigent protein, putative similar to dirigent protein GI:6694699 from [Thuja plicata]                                                 | 246395_at   | -1.1 |
| ribosomal protein L10-like ribosomal protein L10- Nicotiana tabacum, EMBL:AB010879;supported by full-length cDNA: Ceres:29083.         | 245852_at   | -1.1 |
| hypothetical protein predicted by genemark.hmm;supported by full-length cDNA: Ceres:42217.                                             | 245755_at   | -1.1 |
| unknown protein ;supported by full-length cDNA: Ceres:24560.                                                                           | 245665_at   | -1.1 |
| hypothetical protein                                                                                                                   | 245574_at   | -1.1 |
| hypothetical protein ;supported by full-length cDNA: Ceres:30327.                                                                      | 245396_at   | -1.1 |
| Lil3 protein ;supported by full-length cDNA: Ceres:29150.                                                                              | 245354_at   | -1.1 |
| Expressed protein ; supported by full-length cDNA: Ceres: 14223.                                                                       | 245370_at   | -1.1 |
| putative protein ; supported by cDNA: gi_13926241_gb_AF372879.1_AF372879                                                               | 245309_at   | -1.1 |
| isp4 like protein ; supported by cDNA: gi_15451019_gb_AY054590.1_                                                                      | 245296_at   | -1.1 |
| F12A21.4 similar to iEP4 gb AAD11468.1                                                                                                 | 245215_at   | -1.1 |
| F12A21.6 hypothetical protein                                                                                                          | 245193_at   | -1.1 |
| F12A21.13 putative photosystem II Core Complex sp 049347 PSBY_ARATH; similar to ESTs gb BE523181, dbj AV531372.1, dbj AV5278;          | 245195_at   | -1.1 |
| ribosomal protein S16                                                                                                                  | 245049_at   | -1.1 |
| hypothetical protein                                                                                                                   | 245019_at   | -1.1 |
| hypothetical protein                                                                                                                   | 244922_s_at | -1.1 |
| unknown protein                                                                                                                        | 257536_at   | -1.1 |
| rhodanese-like family protein ;supported by full-length cDNA: Ceres:1382.                                                              | 267635_at   | -1   |
| Expressed protein ; supported by full-length cDNA: Ceres: 27620.                                                                       | 267591_at   | -1   |
| putative ribosomal protein S27 ;supported by full-length cDNA: Ceres:18662.                                                            | 267507_at   | -1   |
| unknown protein                                                                                                                        | 267239_at   | -1   |
| putative transport protein ;supported by full-length cDNA: Ceres:26825.                                                                | 267219_at   | -1   |
| putative protein kinase contains a protein kinase domain profile (PDOC00100)                                                           | 266946_at   | -1   |
| hypothetical protein predicted by genscan; supported by cDNA: gi_15146245_gb_AY049264.1_                                               | 266889_at   | -1   |
| acyl carrier protein identical to GB:L23574; supported by cDNA: gi_15450374_gb_AY052288.1_                                             | 266890_at   | -1   |
| 40S ribosomal protein S15A                                                                                                             | 266684_at   | -1   |
| profilin 1 ; supported by cDNA: gi_1353769_gb_U43325.1_ATU43325                                                                        | 266701_at   | -1   |
| unknown protein ; supported by full-length cDNA: Ceres: 41621.                                                                         | 266587_at   | -1   |
| putative proline-rich protein ; supported by cDNA: gi_13265425_gb_AF324669.2_AF324669                                                  | 266588_at   | -1   |
| unknown protein                                                                                                                        | 266352_at   | -1   |
| calmodulin identical to GB:L18912; supported by cDNA: gi_166650_gb_M38380.1_ATHCAM2                                                    | 266317_at   | -1   |
| Expressed protein ; supported by full-length cDNA: Ceres: 112146.                                                                      | 266264_at   | -1   |
| putative PREG1-like negative regulator                                                                                                 | 266124_at   | -1   |
| putative lipid transfer protein                                                                                                        | 265894_at   | -1   |
| unknown protein                                                                                                                        | 265883_at   | -1   |
| putative sugar transporter ;supported by full-length cDNA: Ceres:114959.                                                               | 265768_at   | -1   |
| putative phosphatidic acid phosphatase ;supported by full-length cDNA: Ceres:19163.                                                    | 265737_at   | -1   |
| hypothetical protein predicted by genscan                                                                                              | 265704_at   | -1   |
| 60S ribosomal protein L27                                                                                                              | 265730_at   | -1   |

|                                                                                                                                                  |             |    |
|--------------------------------------------------------------------------------------------------------------------------------------------------|-------------|----|
| putative glycine-rich protein ; supported by cDNA: gi_15215617_gb_AY050337.1_                                                                    | 265511_at   | -1 |
| putative RING-H2 zinc finger protein ;supported by full-length cDNA: Ceres:7201.                                                                 | 265472_at   | -1 |
| putative thioredoxin M ; supported by cDNA: gi_6539611_gb_AF095751.1_AF095751                                                                    | 265476_at   | -1 |
| unknown protein ;supported by full-length cDNA: Ceres:34875.                                                                                     | 265415_at   | -1 |
| unknown protein ; supported by cDNA: gi_16648715_gb_AY058134.1_                                                                                  | 265226_at   | -1 |
| unknown protein ; supported by full-length cDNA: Ceres: 39285.                                                                                   | 265219_at   | -1 |
| unknown protein similar to hypothetical protein GI:9665091 from [Arabidopsis thaliana]                                                           | 264998_at   | -1 |
| hypothetical protein ;supported by full-length cDNA: Ceres:250028.                                                                               | 264870_at   | -1 |
| unknown protein similar to ESTs emb Z27038, gb AA451546, emb Z29876, gb T45359 and gb R90316;supported by full-length cDNA: Cere                 | 264837_at   | -1 |
| unknown protein similar to EST gb H37293;supported by full-length cDNA: Ceres:7188.                                                              | 264808_at   | -1 |
| unknown protein similar to putative glycosyl transferase GI:7268597 from [Arabidopsis thaliana]; supported by cDNA: gi_13878002_gb_AF3           | 264704_at   | -1 |
| Expressed protein ; supported by full-length cDNA: Ceres: 108558.                                                                                | 264579_at   | -1 |
| unknown protein ;supported by full-length cDNA: Ceres:24255.                                                                                     | 263901_at   | -1 |
| unknown protein ;supported by full-length cDNA: Ceres:24885.                                                                                     | 263920_at   | -1 |
| Expressed protein ; supported by full-length cDNA: Ceres: 97088.                                                                                 | 263842_at   | -1 |
| unknown protein ; supported by full-length cDNA: Ceres: 34035.                                                                                   | 263631_at   | -1 |
| Expressed protein ; supported by cDNA: gi_13926282_gb_AF372895.1_AF372895                                                                        | 263632_at   | -1 |
| 60S ribosomal protein L39                                                                                                                        | 263585_at   | -1 |
| CONSTANS-like B-box zinc finger protein ;supported by full-length cDNA: Ceres:17434.                                                             | 263537_at   | -1 |
| unknown protein                                                                                                                                  | 263438_at   | -1 |
| putative glutaredoxin Strong similarity to gb Z49699 glutaredoxin from Ricinus communis                                                          | 263168_at   | -1 |
| putative photosystem I reaction center subunit II precursor Strong similarity to gb X14017 from Spinacia oleracea. ESTs gb R30423, gb T42        | 263114_at   | -1 |
| putative bZIP transcription factor contains a bZIP transcription factor basic domain signature (PDOC00036); supported by cDNA: gi_143350         | 263064_at   | -1 |
| unknown protein                                                                                                                                  | 262868_at   | -1 |
| hypothetical protein predicted by genemark.hmm; supported by full-length cDNA: Ceres: 19759.                                                     | 262878_at   | -1 |
| hypothetical protein predicted by genscan+;supported by full-length cDNA: Ceres:109912.                                                          | 262711_at   | -1 |
| putative ubiquinol-cytochrome-c reductase Similar to gb X79273 cytochrome c reductase hinge protein subunit from Solanum tuberosum. E            | 262593_at   | -1 |
| unknown protein Contains a PF00175 Oxidoreductase FAD/NADH-binding domain. ESTs gb H76345 and gb AA651465 come from this ger                     | 262572_at   | -1 |
| putative amino acid transporter Very similar to amino acid transporter AAT1 [Arabidopsis thaliana] (gi 1076291)                                  | 262522_at   | -1 |
| Expressed protein ; supported by full-length cDNA: Ceres: 103581.                                                                                | 262443_at   | -1 |
| flax rust resistance protein, putative similar to flax rust resistance protein GI:4588066 from [Linum usitatissimum]; supported by full-length c | 262374_s_at | -1 |
| hypothetical protein predicted by genemark.hmm;supported by full-length cDNA: Ceres:5052.                                                        | 262285_at   | -1 |
| Expressed protein ; supported by full-length cDNA: Ceres: 5864.                                                                                  | 262000_at   | -1 |
| hypothetical protein predicted by genemark.hmm; supported by full-length cDNA: Ceres: 38293.                                                     | 261940_at   | -1 |
| unknown protein ; supported by full-length cDNA: Ceres: 30167.                                                                                   | 261790_at   | -1 |
| plastocyanin identical to plastocyanin GI:1865683 from [Arabidopsis thaliana]                                                                    | 261769_at   | -1 |
| hypothetical protein predicted by genemark.hmm                                                                                                   | 261742_at   | -1 |
| unknown protein                                                                                                                                  | 261572_at   | -1 |
| ribonucleoprotein, putative similar to 33 KDA RIBONUCLEOPROTEIN GB:P19684 from [Nicotiana glauca];supported by full-length cDNA/                 | 261577_at   | -1 |
| glutaredoxin, putative similar to glutaredoxin GI:2244924 from [Arabidopsis thaliana]; supported by cDNA: gi_13358219_gb_AF325030.2_A            | 261443_at   | -1 |
| putative calcium-binding protein, calreticulin similar to SP:P12858 from [Arabidopsis thaliana]                                                  | 261197_at   | -1 |
| unknown protein ; supported by cDNA: gi_17063164_gb_AY062103.1_                                                                                  | 261213_at   | -1 |
| dihydroipoamide S-acetyltransferase, putative similar to GI:5881963 from (Arabidopsis thaliana) (Plant Physiol. 120 (2), 443-452 (1999));st      | 261165_at   | -1 |
| unknown protein identical to SP:O50061 from [Arabidopsis thaliana];supported by full-length cDNA: Ceres:12704.                                   | 261078_at   | -1 |
| hypothetical protein predicted by genemark.hmm; supported by cDNA: gi_14334897_gb_AY035122.1_                                                    | 260968_at   | -1 |
| Expressed protein ; supported by full-length cDNA: Ceres: 17110.                                                                                 | 260685_at   | -1 |
| hypothetical protein predicted by genemark.hmm;supported by full-length cDNA: Ceres:95383.                                                       | 260651_at   | -1 |
| ACC oxidase, putative similar to ACC oxidase GI:587086 from [Brassica oleracea]; supported by cDNA: gi_15028038_gb_AY045876.1_                   | 260637_at   | -1 |
| hypothetical protein predicted by genefinder                                                                                                     | 260522_x_at | -1 |
| AtHVA22c identical to AtHVA22c GB:AF141661 [Arabidopsis thaliana];supported by full-length cDNA: Ceres:108964.                                   | 260368_at   | -1 |
| putative aminolevulinatase dehydratase similar to aminolevulinatase dehydratase GB:1097877 [Lycopersicon esculentum]; supported by cDNA: i       | 260370_at   | -1 |
| putative dolichyl-phosphate mannosyltransferase polypeptide 2 similar to dolichyl-phosphate mannosyltransferase polypeptide 2 GB:450336          | 260257_at   | -1 |
| putative histone H2A similar to histone H2A GB:CAA73155 from [Arabidopsis thaliana]; supported by full-length cDNA: Ceres: 10668.                | 260154_at   | -1 |

|                                                                                                                                                                                                                                                    |           |    |
|----------------------------------------------------------------------------------------------------------------------------------------------------------------------------------------------------------------------------------------------------|-----------|----|
| inner mitochondrial membrane protein identical to inner mitochondrial membrane protein GB:U18126 [Arabidopsis thaliana];supported by full-length cDNA: Ceres:42300.                                                                                | 259890_at | -1 |
| photosystem I subunit VI precursor identical to photosystem I subunit VI precursor [Arabidopsis thaliana] GI:5734524;supported by full-length cDNA: Ceres:10984.                                                                                   | 259840_at | -1 |
| unknown protein similar to GB:AAB81674 [Arabidopsis thaliana]                                                                                                                                                                                      | 259763_at | -1 |
| putative AUX1-like permease similar to AUX1 (regulator of root gravitropism, putative permease) GB:CAA67308 [Arabidopsis thaliana]; supported by cDNA: gi_13937162_gb_AF372935.1_AF372935                                                          | 259680_at | -1 |
| unknown protein ; supported by cDNA: gi_13937162_gb_AF372935.1_AF372935                                                                                                                                                                            | 259665_at | -1 |
| Expressed protein ; supported by full-length cDNA: Ceres: 42300.                                                                                                                                                                                   | 259603_at | -1 |
| putative GAR1 protein similar to GB:P28007 from [Saccharomyces cerevisiae]; supported by full-length cDNA: Ceres: 10984.                                                                                                                           | 259347_at | -1 |
| putative 2-cys peroxiredoxin BAS1 precursor (thiol-specific antioxidant protein) similar to 2-cys peroxiredoxin BAS1 precursor (thiol-specific) unknown protein predicted by genefinder, single est match                                          | 259237_at | -1 |
| putative ribose 5-phosphate isomerase identical to putative ribose 5-phosphate isomerase GB:AAD57010 (Arabidopsis thaliana); similar to unknown protein similar to hin1 GB:CAA68848 [Nicotiana tabacum];supported by full-length cDNA: Ceres:8166. | 259247_at | -1 |
| putative ribosomal protein S28 similar to ribosomal protein S28 GB:P34789 [Arabidopsis thaliana]                                                                                                                                                   | 259098_at | -1 |
| putative serine carboxypeptidase II similar to serine carboxypeptidase II (CP-MII) GB:CAA70815 [Hordeum vulgare];supported by full-length cDNA: Ceres:32010.                                                                                       | 259102_at | -1 |
| putative wound-induced basic protein similar to wound-induced basic protein GB:Q09020 [Phaseolus vulgaris] (Plant Physiol. 101 (4), 1409)                                                                                                          | 258937_at | -1 |
| unknown protein ; supported by cDNA: gi_15028124_gb_AY046012.1_                                                                                                                                                                                    | 258857_at | -1 |
| hypothetical protein predicted by genscan+;supported by full-length cDNA: Ceres:21672.                                                                                                                                                             | 258821_at | -1 |
| unknown protein ;supported by full-length cDNA: Ceres:15303.                                                                                                                                                                                       | 258728_at | -1 |
| AIG2-like protein similar to AIG2 protein GB:P54121 from [Arabidopsis thaliana];supported by full-length cDNA: Ceres:28511.                                                                                                                        | 258742_at | -1 |
| hypothetical protein similar to hypothetical protein GB:AAD50054 from [Arabidopsis thaliana]                                                                                                                                                       | 258394_at | -1 |
| unknown protein ;supported by full-length cDNA: Ceres:32010.                                                                                                                                                                                       | 258002_at | -1 |
| translational inhibitor protein, putative similar to GB:NP_005827 from [Homo sapiens], contains Pfam profile: PF01042 Domain of unknown protein ;supported by full-length cDNA: Ceres:36370.                                                       | 257964_at | -1 |
| calmodulin, putative similar to GB:P07463 from [Paramecium tetraurelia] (Cell 62 (1), 165-174 (1990))                                                                                                                                              | 257831_at | -1 |
| glutamine synthetase, putative similar to glutamine synthetase [Raphanus sativus] GI:1526564;supported by full-length cDNA: Ceres:2662.                                                                                                            | 257674_at | -1 |
| unknown protein ; supported by full-length cDNA: Ceres: 148308.                                                                                                                                                                                    | 257003_at | -1 |
| integral membrane protein, putative similar to GI:1209755 from [Beta vulgaris] (Plant Physiol. 110 110 (2), 511-520 (1996)); supported by cDNA: gi_15028124_gb_AY046012.1_                                                                         | 256755_at | -1 |
| guanine nucleotide-binding protein, putative similar to guanine nucleotide-binding protein GI:9294068 from [Arabidopsis thaliana]; supported by full-length cDNA: Ceres: 11843.                                                                    | 256524_at | -1 |
| Expressed protein ; supported by full-length cDNA: Ceres: 11843.                                                                                                                                                                                   | 256456_at | -1 |
| putative chloroplast 50S ribosomal protein L28 ;supported by full-length cDNA: Ceres:31633.                                                                                                                                                        | 256458_at | -1 |
| unknown protein similar to unknown protein GI:6714347 from [Arabidopsis thaliana];supported by full-length cDNA: Ceres:103226.                                                                                                                     | 256144_at | -1 |
| Expressed protein ; supported by cDNA: gi_4741922_gb_AF130849.1_AF130849                                                                                                                                                                           | 255968_at | -1 |
| putative protein disulfide isomerase                                                                                                                                                                                                               | 255850_at | -1 |
| DNA-binding protein ;supported by full-length cDNA: Ceres:28019.                                                                                                                                                                                   | 255733_at | -1 |
| Expressed protein ; supported by full-length cDNA: Ceres: 266299.                                                                                                                                                                                  | 255511_at | -1 |
| hypothetical protein ;supported by full-length cDNA: Ceres:6848.                                                                                                                                                                                   | 255061_at | -1 |
| predicted protein                                                                                                                                                                                                                                  | 255037_at | -1 |
| PROTEIN TRANSPORT PROTEIN SEC61 GAMMA SUBUNIT -like PROTEIN TRANSPORT PROTEIN SEC61 GAMMA SUBUNIT, ORYZA SATIVATA                                                                                                                                  | 254505_at | -1 |
| putative ribosomal protein S10 40S ribosomal protein S10 - Lumbricus rubellus, PID:e1329701; supported by cDNA: gi_14334535_gb_AY046012.1_                                                                                                         | 254356_at | -1 |
| putative ribosomal protein ribosomal protein L31, Nicotiana glutinosa, U23784;supported by full-length cDNA: Ceres:14013.                                                                                                                          | 254303_at | -1 |
| fructose-bisphosphate aldolase - like protein fructose-bisphosphate aldolase, Arabidopsis thaliana, PIR1:ADMU;supported by full-length cDNA: gi_15809977_gb_AY054257.1_                                                                            | 254083_at | -1 |
| Expressed protein ; supported by cDNA: gi_15809977_gb_AY054257.1_                                                                                                                                                                                  | 254049_at | -1 |
| carbohydrate kinase - like protein phosphofructokinase, Babesia canis, AJ223322;supported by full-length cDNA: Ceres:799.                                                                                                                          | 254012_at | -1 |
| hypothetical protein ;supported by full-length cDNA: Ceres:42155.                                                                                                                                                                                  | 253971_at | -1 |
| putative protein                                                                                                                                                                                                                                   | 253877_at | -1 |
| photosystem II protein W - like photosystem II protein W, Porphyra purpurea, PIR2:S73268; supported by full-length cDNA: Ceres: 2419.                                                                                                              | 253858_at | -1 |
| glycine-rich protein like glycine-rich protein 5 - Arabidopsis thaliana,PIR2:JQ1064; supported by full-length cDNA: Ceres: 33435.                                                                                                                  | 253856_at | -1 |
| putative protein ;supported by full-length cDNA: Ceres:8077.                                                                                                                                                                                       | 253802_at | -1 |
| putative protein predicted proteins, Arabidopsis thaliana;supported by full-length cDNA: Ceres:34819.                                                                                                                                              | 253790_at | -1 |
| putative protein (fragment) calcineurin B, Naegleria gruberi, gb;U04380                                                                                                                                                                            | 253754_at | -1 |
| putative protein dihydrokaempferol 4-reductase (EC 1.1.1.219) -Synechocystis, PIR2:S75325; supported by cDNA: gi_13926212_gb_AF372935.1_AF372935                                                                                                   | 253562_at | -1 |
| putative endothelin converting enzyme, Bos primigenius taurus, PIR2:I46078                                                                                                                                                                         | 253421_at | -1 |
| Expressed protein ; supported by full-length cDNA: Ceres: 279.                                                                                                                                                                                     | 253412_at | -1 |
| RING-H2 finger protein RHA3b ;supported by full-length cDNA: Ceres:31493.                                                                                                                                                                          | 253334_at | -1 |
|                                                                                                                                                                                                                                                    | 253256_at | -1 |
|                                                                                                                                                                                                                                                    | 253234_at | -1 |
|                                                                                                                                                                                                                                                    | 253140_at | -1 |

|                                                                                                                                               |             |    |
|-----------------------------------------------------------------------------------------------------------------------------------------------|-------------|----|
| DnaJ-like protein DnaJ-like protein, Phaseolus vulgaris, PATX:G1684851                                                                        | 253125_at   | -1 |
| acidic ribosomal protein P2 -like acidic ribosomal protein P2, maize, PIR:S54179                                                              | 252643_at   | -1 |
| RNA binding protein -like COLD-INDUCIBLE RNA-BINDING PROTEIN, Homo sapiens, SWISSPROT:CIRP_HUMAN                                              | 252559_at   | -1 |
| hypothetical protein                                                                                                                          | 252418_at   | -1 |
| putative protein pectinesterase - Arabidopsis thaliana, PIR:S51370; supported by cDNA: gi_14517535_gb_AY039603.1_                             | 252406_at   | -1 |
| Expressed protein ; supported by cDNA: gi_16323485_gb_AY059131.1_                                                                             | 252328_at   | -1 |
| hypothetical protein various predicted proteins, Arabidopsis thaliana                                                                         | 252205_at   | -1 |
| UTP-glucose glucosyltransferase - like protein UTP-glucose glucosyltransferase, Manihot esculenta, PIR:S41951; supported by cDNA: gi_1        | 252183_at   | -1 |
| LS1-like protein AT-LS1 product - Arabidopsis thaliana, EMBL:X58827;supported by full-length cDNA: Ceres:107294.                              | 252076_at   | -1 |
| transcription factor NF-Y, CCAAT-binding - like protein transcription factor NF-Y, CCAAT-binding, Zea mays, PIR:S22820                        | 251991_at   | -1 |
| plasma membrane intrinsic protein 2a ;supported by full-length cDNA: Ceres:38965.                                                             | 251962_at   | -1 |
| histone H4-like protein several histone H4 proteins;supported by full-length cDNA: Ceres:13571.                                               | 251924_at   | -1 |
| putative protein                                                                                                                              | 251788_at   | -1 |
| putative protein MtN24, Medicago truncatula, EMBL:MTY15290;supported by full-length cDNA: Ceres:6434.                                         | 251795_at   | -1 |
| proline transporter 2                                                                                                                         | 251752_at   | -1 |
| putative protein                                                                                                                              | 251720_at   | -1 |
| putative protein unknown protein 110K5.12 - Sorghum bicolor, TREMBL:AF124045_5;supported by full-length cDNA: Ceres:142358.                   | 251704_at   | -1 |
| putative protein hypothetical proteins At2g44600 - Arabidopsis thaliana, EMBL:AAC27462                                                        | 251459_at   | -1 |
| hypothetical protein                                                                                                                          | 251414_at   | -1 |
| putative protein several hypothetical proteins;supported by full-length cDNA: Ceres:29280.                                                    | 251285_at   | -1 |
| putative protein hypothetical protein AT4g29780 (F27B13.20) - Arabidopsis thaliana, EMBL:AL050352; supported by cDNA: gi_13878074_            | 251173_at   | -1 |
| putative protein                                                                                                                              | 250942_at   | -1 |
| leucoanthocyanidin dioxygenase-like protein ;supported by full-length cDNA: Ceres:13012.                                                      | 250793_at   | -1 |
| putative protein similar to unknown protein (gb AAD23015.1)                                                                                   | 250682_x_at | -1 |
| putative protein similar to unknown protein (pir T14195)                                                                                      | 250683_x_at | -1 |
| thioredoxin-like ; supported by cDNA: gi_4973263_gb_AF144391.1_AF144391                                                                       | 250649_at   | -1 |
| unknown protein                                                                                                                               | 250595_at   | -1 |
| putative protein 23 kDa polypeptide of water-oxidizing complex of photosystem II, Nicotiana tabacum, EMBL:NT23WOP2B                           | 250371_at   | -1 |
| putative protein predicted proteins, Arabidopsis thaliana                                                                                     | 250265_at   | -1 |
| putative protein ;supported by full-length cDNA: Ceres:12170.                                                                                 | 250189_at   | -1 |
| ribosomal protein precursor - like ribosomal protein S13 precursor, chloroplast Arabidopsis thaliana, PIR:S59594; supported by cDNA: gi_1     | 250190_at   | -1 |
| high affinity nitrate transporter - like protein high affinity nitrate transporter, Oryza sativa, EMBL:AB008519; supported by cDNA: gi_143347 | 250151_at   | -1 |
| putative protein predicted protein, Arabidopsis thaliana                                                                                      | 249919_at   | -1 |
| unknown protein                                                                                                                               | 249929_at   | -1 |
| unknown protein                                                                                                                               | 249932_at   | -1 |
| ATP-dependent Clp protease proteolytic subunit (ClpP2), putative similar to SP:Q9X6W8 ATP-dependent Clp protease proteolytic subunit (        | 249873_at   | -1 |
| squalene monooxygenase 1,2 (squalene epoxidase 1,2) (se 1,2) (sp O65402)                                                                      | 249775_at   | -1 |
| unknown protein                                                                                                                               | 249776_at   | -1 |
| acyltransferase -like protein Anthocyanin 5-aromatic acyltransferase, Gentiana triflora, EMBL:AB010708;supported by full-length cDNA: Ce      | 249493_at   | -1 |
| hypothetical protein                                                                                                                          | 249355_at   | -1 |
| zinc finger - like protein predicted protein, Drosophila melanogaster, EMBL:AE003589                                                          | 249370_at   | -1 |
| putative protein similar to unknown protein (pir T00965);supported by full-length cDNA: Ceres:777.                                            | 249076_at   | -1 |
| unknown protein                                                                                                                               | 249004_at   | -1 |
| unknown protein ; supported by cDNA: gi_13926304_gb_AF372903.1_AF372903                                                                       | 248975_at   | -1 |
| putative protein contains similarity to plastid ribosomal protein L19;supported by full-length cDNA: Ceres:30034.                             | 248798_at   | -1 |
| Expressed protein ; supported by full-length cDNA: Ceres: 28462.                                                                              | 248762_at   | -1 |
| putative protein similar to unknown protein (pir T08406)                                                                                      | 248614_at   | -1 |
| putative protein contains similarity to DNA binding protein PCF1;supported by full-length cDNA: Ceres:247645.                                 | 248385_at   | -1 |
| putative protein contains similarity to 40S ribosomal protein S10;supported by full-length cDNA: Ceres:91769.                                 | 248331_at   | -1 |
| putative protein similar to unknown protein (pir T04792)                                                                                      | 248085_at   | -1 |
| putative protein contains similarity to GPI-anchored protein                                                                                  | 247996_at   | -1 |
| unknown protein                                                                                                                               | 247959_at   | -1 |
| 60S ribosomal protein L12 - like 60S RIBOSOMAL PROTEIN L12 (like), Arabidopsis thaliana, PIR:T45883;supported by full-length cDNA: C          | 247584_at   | -1 |

|                                                                                                                                       |             |      |
|---------------------------------------------------------------------------------------------------------------------------------------|-------------|------|
| putative protein predicted proteins, Arabidopsis thaliana;supported by full-length cDNA: Ceres:16638.                                 | 247585_at   | -1   |
| dihydroneopterin aldolase-like protein                                                                                                | 247409_at   | -1   |
| photosystem I reaction centre subunit psaN precursor (PSI-N) (sp P49107) ; supported by cDNA: gi_1237123_gb_U32176.1_ATU32176         | 247320_at   | -1   |
| unknown protein ;supported by full-length cDNA: Ceres:10032.                                                                          | 247328_at   | -1   |
| arabinogalactan-protein (gb AAC77823.1) ;supported by full-length cDNA: Ceres:25423.                                                  | 247279_at   | -1   |
| 14-3-3 protein GF14kappa (grf8) identical to 14-3-3 protein GF14 kappa GI:5802794, SP:P48348 from [Arabidopsis thaliana];supported by | 247188_at   | -1   |
| homeobox-leucine zipper protein ATHB-5 (HD-zip protein ATHB-5) (sp P46667) ; supported by cDNA: gi_13358240_gb_AF325054.2_AF32        | 247191_at   | -1   |
| putative protein similar to unknown protein (emb CAB66916.1);supported by full-length cDNA: Ceres:9323.                               | 247109_at   | -1   |
| apospory-associated protein C-like                                                                                                    | 247101_at   | -1   |
| putative protein similar to unknown protein (gb AAD20709.1)                                                                           | 247102_at   | -1   |
| putative protein similar to unknown protein (pir T05276); supported by cDNA: gi_15292834_gb_AY050851.1_                               | 247049_at   | -1   |
| unknown protein ;supported by full-length cDNA: Ceres:9946.                                                                           | 247009_at   | -1   |
| putative protein ferroportin1, Mus musculus, EMBL:AF226613                                                                            | 246847_at   | -1   |
| transmembrane protein FT27/PFT27-like ;supported by full-length cDNA: Ceres:12993.                                                    | 246619_at   | -1   |
| putative protein hypothetical protein T26J14.6 - Arabidopsis thaliana, EMBL:AC011915; supported by cDNA: gi_13358202_gb_AF325010.2    | 246506_at   | -1   |
| minor allergen ;supported by full-length cDNA: Ceres:35084.                                                                           | 246201_at   | -1   |
| lipophosphoglycan biosynthetic protein - like lipophosphoglycan biosynthetic protein (LPG2), Leishmania donovani, TREMBL:LD26175      | 246143_at   | -1   |
| putative protein predicted proteins from various species; supported by full-length cDNA: Ceres:17786.                                 | 246156_at   | -1   |
| putative protein FH protein interacting protein FIP1, Arabidopsis thaliana, EMBL:AF174428;supported by full-length cDNA: Ceres:19508. | 246034_at   | -1   |
| putative protein predicted proteins, Arabidopsis thaliana;supported by full-length cDNA: Ceres:19897.                                 | 246000_at   | -1   |
| putative protein 22kDa peroxisomal membrane protein-like - Homo sapiens, EMBL:AF250136;supported by full-length cDNA: Ceres:6789.     | 245937_at   | -1   |
| putative protein predicted protein At2g25260 - Arabidopsis thaliana, EMBL:AC007070;supported by full-length cDNA: Ceres:6674.         | 245853_at   | -1   |
| hypothetical protein predicted by genscan+; supported by cDNA: gi_16323183_gb_AY057696.1_                                             | 245776_at   | -1   |
| disease resistance RPP5 like protein (fragment)                                                                                       | 245450_at   | -1   |
| hypothetical protein                                                                                                                  | 245414_at   | -1   |
| Expressed protein ; supported by full-length cDNA: Ceres:7101.                                                                        | 245337_at   | -1   |
| cytochrome f                                                                                                                          | 245020_at   | -1   |
| hypothetical protein predicted by genfinder                                                                                           | 267586_at   | -0.9 |
| hypothetical protein predicted by genfinder and genscan;supported by full-length cDNA: Ceres:23742.                                   | 267553_s_at | -0.9 |
| TCP1-chaperonin cofactor A isolog ;supported by full-length cDNA: Ceres:1853.                                                         | 267494_at   | -0.9 |
| unknown protein                                                                                                                       | 267383_at   | -0.9 |
| unknown protein ;supported by full-length cDNA: Ceres:39057.                                                                          | 267367_at   | -0.9 |
| fatty acid hydroxylase (FAH1) identical to GB:AF021804; supported by cDNA: gi_15215595_gb_AY050326.1_                                 | 267318_at   | -0.9 |
| putative serine carboxypeptidase I ; supported by cDNA: gi_15294269_gb_AF410326.1_AF410326                                            | 267265_at   | -0.9 |
| unknown protein                                                                                                                       | 267041_at   | -0.9 |
| unknown protein ;supported by full-length cDNA: Ceres:16403.                                                                          | 266979_at   | -0.9 |
| unknown protein                                                                                                                       | 266473_at   | -0.9 |
| hypothetical protein predicted by grail                                                                                               | 266474_at   | -0.9 |
| unknown protein ;supported by full-length cDNA: Ceres:10986.                                                                          | 266476_at   | -0.9 |
| putative protease inhibitor ;supported by full-length cDNA: Ceres:11662.                                                              | 266168_at   | -0.9 |
| predicted protein ;supported by cDNA: Ceres:168                                                                                       | 266059_at   | -0.9 |
| unknown protein supported by cDNA: gi:13926173                                                                                        | 265952_at   | -0.9 |
| unknown protein ;supported by full-length cDNA: Ceres:8247.                                                                           | 265872_at   | -0.9 |
| unknown protein                                                                                                                       | 265837_at   | -0.9 |
| hypothetical protein predicted by genscan                                                                                             | 265840_at   | -0.9 |
| Expressed protein ; supported by full-length cDNA: Ceres:18284.                                                                       | 265819_at   | -0.9 |
| 40S ribosomal protein S12 ;supported by full-length cDNA: Ceres:13453.                                                                | 265671_at   | -0.9 |
| unknown protein ;supported by full-length cDNA: Ceres:123225.                                                                         | 265626_at   | -0.9 |
| putative calmodulin-like protein                                                                                                      | 265494_at   | -0.9 |
| unknown protein                                                                                                                       | 265451_at   | -0.9 |
| putative ADP-ribosylation factor ; supported by cDNA: gi_13926231_gb_AF372875.1_AF372875                                              | 265187_at   | -0.9 |
| unknown protein                                                                                                                       | 265148_at   | -0.9 |
| unknown protein similar to ESTs gb T76678 and gb A1165001;supported by full-length cDNA: Ceres:251549.                                | 265130_at   | -0.9 |

|                                                                                                                                                 |             |      |
|-------------------------------------------------------------------------------------------------------------------------------------------------|-------------|------|
| 3-ketoacyl-acyl carrier protein synthase III (KAS III) identical to 3-ketoacyl-acyl carrier protein synthase III (KAS III) GB:CAA72385 GI:18883 | 265120_at   | -0.9 |
| unknown protein similar to small zinc finger-like protein GI:5107149 from [Oryza sativa]; supported by full-length cDNA: Ceres: 21075.          | 265006_at   | -0.9 |
| putative coproporphyrinogen III oxidase similar to GB:S39523 and ESTs gb AA586260 and dbj D48620; supported by cDNA: gi_14624991_               | 264820_at   | -0.9 |
| putative elongation factor similar to GB:AAC67357                                                                                               | 264664_at   | -0.9 |
| unknown protein ESTs gb H37208,gb H36853 come from this gene                                                                                    | 264665_at   | -0.9 |
| lipoyltransferase identical to GB:BAA78386; supported by cDNA: gi_4996285_dbj_AB020975.1_AB020975                                               | 264613_at   | -0.9 |
| unknown protein similar to EST gb AA650671 and gb T20610                                                                                        | 264488_s_at | -0.9 |
| postsynaptic protein CRIPT, putative similar to postsynaptic protein CRIPT GI:3098551 from [Rattus norvegicus]; supported by full-length cl     | 264399_at   | -0.9 |
| carbonic anhydrase, putative similar to carbonic anhydrase GI:882241 from [Flaveria linearis]; supported by full-length cDNA: Ceres: 38715      | 264313_at   | -0.9 |
| aromatic rich glycoprotein, putative similar to aromatic rich glycoprotein GI:1762428 from [Arabidopsis thaliana]; supported by cDNA: gi_171    | 264315_at   | -0.9 |
| acyl carrier protein, putative similar to acyl carrier protein GI:1296948 from [Neurospora crassa]; supported by full-length cDNA: Ceres: 140   | 264162_at   | -0.9 |
| putative cyclin-dependent kinase regulatory subunit                                                                                             | 264061_at   | -0.9 |
| Expressed protein ; supported by full-length cDNA: Ceres: 19643.                                                                                | 264022_at   | -0.9 |
| hypothetical protein predicted by genscan;supported by full-length cDNA: Ceres:114613.                                                          | 263930_at   | -0.9 |
| 60s ribosomal protein L34 identical to GB:Q42351, location of EST 105E2T7, gb T22624;supported by full-length cDNA: Ceres:7182.                 | 263691_at   | -0.9 |
| putative putative 60S ribosomal protein L17 identical to GB:AAB80655; supported by full-length cDNA: Ceres: 4513.                               | 263665_at   | -0.9 |
| putative 40S ribosomal protein S15 Strong similarity to Oryza 40S ribosomal protein S15. ESTs gb R29788,gb ATTS0365 come from this g            | 263667_at   | -0.9 |
| putative beta-ketoacyl-CoA synthase                                                                                                             | 263606_at   | -0.9 |
| 40S ribosomal protein S14 ;supported by full-length cDNA: Ceres:41471.                                                                          | 263286_at   | -0.9 |
| hypothetical protein predicted by genemark.hmm;supported by full-length cDNA: Ceres:5677.                                                       | 263133_at   | -0.9 |
| unknown protein ;supported by full-length cDNA: Ceres:5198.                                                                                     | 263048_s_at | -0.9 |
| rac-like GTP binding protein (ARAC5) identical to rac-like GTP-binding protein (ARAC5) SP:Q38937 [Arabidopsis thaliana (Mouse-ear cross         | 262729_at   | -0.9 |
| hypothetical protein Strong similarity to gj 4734005 F3L12.7 hypothetical protein from Arabidopsis thaliana BAC gb AC007178; supported by       | 262569_at   | -0.9 |
| auxin response factor 1, putative similar to auxin response factor 1 GI:2245378 from [Arabidopsis thaliana]                                     | 262566_at   | -0.9 |
| hypothetical protein predicted by genscan+                                                                                                      | 262490_at   | -0.9 |
| unknown protein                                                                                                                                 | 262394_at   | -0.9 |
| unknown protein ; supported by cDNA: gi_12642919_gb_AF339720.1_AF339720                                                                         | 262402_at   | -0.9 |
| H+-transporting ATPase protein, putative similar to H+-transporting ATPase chain E GB:CAB43050 GI:4850294 from [Arabidopsis thaliana]           | 262354_at   | -0.9 |
| serine threonine kinase, putative similar to GB:CAA73067 from (Sorghum bicolor) (Plant Mol. Biol. 36 (4), 529-539 (1998)); supported by cL      | 262244_at   | -0.9 |
| hypothetical protein predicted by genemark.hmm;supported by full-length cDNA: Ceres:24864.                                                      | 262170_at   | -0.9 |
| DNA binding protein, putative similar to GB:BAA23142 GI:2580438 from [Oryza sativa]; supported by cDNA: gi_15912302_gb_AY056429.1               | 262028_at   | -0.9 |
| J8-like protein similar to DnaJ homologue J8 GB:AAC72399 GI:3851670 from [Arabidopsis thaliana];supported by full-length cDNA: Ceres:4          | 261901_at   | -0.9 |
| 40S ribosomal protein S12, putative similar to 40S ribosomal protein S12 GI:4263712 from [Arabidopsis thaliana];supported by full-length cl     | 261789_at   | -0.9 |
| hypothetical protein predicted by genemark.hmm                                                                                                  | 261817_at   | -0.9 |
| hypothetical protein similar to putative auxin-induced protein GI:4337198 from [Arabidopsis thaliana]                                           | 261776_at   | -0.9 |
| hypothetical protein predicted by genemark.hmm                                                                                                  | 261597_at   | -0.9 |
| unknown protein contains similarity to extensin-like protein GB:CAA19879 GI:3297821 from [Arabidopsis thaliana]                                 | 261598_at   | -0.9 |
| DNA-binding factor, putative similar to GT-2 factor GB: CAA51289 GI:416490 from [Arabidopsis thaliana]                                          | 261594_at   | -0.9 |
| E2, ubiquitin-conjugating enzyme 1 (UBC1) identical to gi:431259, SP:P25865;supported by full-length cDNA: Ceres:18146.                         | 261484_at   | -0.9 |
| Expressed protein ; supported by full-length cDNA: Ceres: 14314.                                                                                | 261439_at   | -0.9 |
| hypothetical protein predicted by genemark.hmm; supported by cDNA: gi_13878106_gb_AF370316.1_AF370316                                           | 261338_at   | -0.9 |
| unknown protein                                                                                                                                 | 261143_at   | -0.9 |
| 1-aminocyclopropane-1-carboxylate synthase, putative similar to GB:U35779 from [Triticum aestivum] (Plant Mol. Biol. 31 (5), 1009-1020 (1       | 261108_at   | -0.9 |
| phosphatidylinositol-4-phosphate 5-kinase, putative similar to phosphatidylinositol-4-phosphate 5-kinase GB:CAB53377 GI:5777366 from [          | 260855_at   | -0.9 |
| b-Zip DNA binding protein, putative similar to b-Zip DNA binding protein GB:CAB06697 GI:2246376 from [Arabidopsis thaliana]                     | 260819_at   | -0.9 |
| unknown protein ; supported by cDNA: gi_13358204_gb_AF325013.2_AF325013                                                                         | 260686_at   | -0.9 |
| flower development protein cycloidea (cyc3), putative similar to flower development protein cycloidea (cyc3) GI:6358611 from [Misopates oi      | 260618_at   | -0.9 |
| Expressed protein ; supported by cDNA: gi_15294273_gb_AF410328.1_AF410328                                                                       | 260601_at   | -0.9 |
| putative small nuclear ribonucleoprotein polypeptide F                                                                                          | 260564_at   | -0.9 |
| putative signal recognition particle protein 14kD, ATSRP14 ; supported by full-length cDNA: Ceres: 97249.                                       | 260569_at   | -0.9 |
| putative cytochrome c oxidase Vc subunit                                                                                                        | 260579_at   | -0.9 |
| putative trypsin inhibitor ;supported by full-length cDNA: Ceres:85.                                                                            | 260547_at   | -0.9 |
| Expressed protein ; supported by full-length cDNA: Ceres: 91704.                                                                                | 260549_at   | -0.9 |

|                                                                                                                                               |           |      |
|-----------------------------------------------------------------------------------------------------------------------------------------------|-----------|------|
| unknown protein                                                                                                                               | 260460_at | -0.9 |
| hypothetical protein predicted by genscan+, similar to adenosine kinase (EC 2.7.1.20) GB:S52758 from [Leishmania donovani];supported b        | 260388_at | -0.9 |
| unknown protein similar to putative protein GB:CAA20468 [Arabidopsis thaliana]                                                                | 260314_at | -0.9 |
| putative ribosomal protein similar to ribosomal protein L33B GB:NP_014877 from [Saccharomyces cerevisiae]; supported by full-length cDN       | 260258_at | -0.9 |
| hypothetical protein predicted by genscan+                                                                                                    | 260109_at | -0.9 |
| 60S ribosomal protein L18A, putative similar to GI:3128228 from [Arabidopsis thaliana] (Nature 402 (6763), 761-768 (1999));supported by f     | 260026_at | -0.9 |
| unknown protein ;supported by full-length cDNA: Ceres:142725.                                                                                 | 259980_at | -0.9 |
| predicted protein ; supported by cDNA: gi_13358245_gb_AF325060.2_AF325060                                                                     | 259889_at | -0.9 |
| hypothetical protein predicted by genefinder                                                                                                  | 259729_at | -0.9 |
| thaumatin-like protein similar to thaumatin-like protein GB:AAB71214 [Arabidopsis thaliana]; Pfam HMM hit: Thaumatin family                   | 259674_at | -0.9 |
| nuclear transport factor 2, putative similar to nuclear transport factor 2 (NTF2) [Oryza sativa] GI:5360221; supported by full-length cDNA: C | 259593_at | -0.9 |
| chlorophyll binding protein, putative similar to chlorophyll binding protein GI:169213 from [Petunia hybrida]                                 | 259491_at | -0.9 |
| putative 40S ribosomal protein s14 similar to 40S ribosomal protein S14 GB:P19950 [Zea mays]; supported by full-length cDNA: Ceres: 796       | 259239_at | -0.9 |
| unknown protein                                                                                                                               | 259250_at | -0.9 |
| putative thylakoid lumen rotamase similar to thylakoid lumen rotamase GB:CAA72792 [Spinacia oleracea];supported by full-length cDNA: C        | 259193_at | -0.9 |
| unknown protein similar to hypothetical protein GB:AAD27575 [Sorghum bicolor];supported by full-length cDNA: Ceres:23057.                     | 259131_at | -0.9 |
| unknown protein similar to GB:CAB05547 [Caenorhabditis elegans]                                                                               | 259085_at | -0.9 |
| unknown protein HMM hit: 2Fe-2S iron-sulfur cluster binding domain;supported by full-length cDNA: Ceres:29120.                                | 259016_at | -0.9 |
| hypothetical protein predicted by genscan                                                                                                     | 259000_at | -0.9 |
| putative 40S ribosomal protein S19 similar to 40S ribosomal protein S19 GB:P40978 [Oryza sativa]; supported by full-length cDNA: Ceres: 4     | 258858_at | -0.9 |
| putative ubiquinol-cytochrome C reductase complex ubiquinone-binding protein (QP-C) similar to ubiquinol-cytochrome C reductase comple        | 258772_at | -0.9 |
| unknown protein ;supported by full-length cDNA: Ceres:250294.                                                                                 | 258788_at | -0.9 |
| putative amino acid transporter protein similar to amino acid transport protein GB:AAB82307 [Arabidopsis thaliana]; contains Pfam profile: P  | 258729_at | -0.9 |
| unknown protein ;supported by full-length cDNA: Ceres:24905.                                                                                  | 258642_at | -0.9 |
| unknown protein ; supported by cDNA: gi_13605546_gb_AF361599.1_AF361599                                                                       | 258623_at | -0.9 |
| hypothetical protein predicted by genscan+;supported by full-length cDNA: Ceres:262487.                                                       | 258551_at | -0.9 |
| unknown protein                                                                                                                               | 258318_at | -0.9 |
| putative ribosomal protein similar to ribosomal protein L37 GB:BAA04888 from [Homo sapiens];supported by full-length cDNA: Ceres:14710        | 258284_at | -0.9 |
| putative ribosomal protein similar to ribosomal protein L41 GB:AAA34366 from [Candida maltosa]; supported by full-length cDNA: Ceres: 13      | 258296_at | -0.9 |
| Expressed protein ; supported by full-length cDNA: Ceres: 29124.                                                                              | 258297_at | -0.9 |
| putative shikimate kinase similar to shikimate kinase precursor GB:CAA45121 [Lycopersicon esculentum]                                         | 258281_at | -0.9 |
| protein kinase, putative similar to GB:BAA24694 from [Arabidopsis thaliana] (Plant Cell Physiol. 38 (3), 248-258 (1997));supported by full-le | 258132_at | -0.9 |
| dihydroipoamide S-acetyltransferase identical to GB:AAD55139 from [Arabidopsis thaliana]; supported by cDNA: gi_14335165_gb_AY0372            | 258086_at | -0.9 |
| putative peroxiredoxin similar to peroxiredoxin Q GB:BAA90524 from [Sedum lineare]; supported by cDNA: gi_15081742_gb_AY048264.1_             | 258087_at | -0.9 |
| hypothetical protein predicted by genscan+                                                                                                    | 257962_at | -0.9 |
| cell elongation protein, Dwarf1 identical to GB:S71189 from [Arabidopsis thaliana]; supported by cDNA: gi_516042_gb_U12400.1_ATU124           | 257938_at | -0.9 |
| unknown protein ;supported by full-length cDNA: Ceres:92314.                                                                                  | 257925_at | -0.9 |
| ribonucleotide reductase small subunit, putative similar to RIBONUCLEOSIDE-DIPHOSPHATE REDUCTASE SMALL CHAIN GB:P49730 f                      | 257809_at | -0.9 |
| ethylene responsive element binding factor, putative similar to GB:BAA32420 from [Arabidopsis thaliana], contains Pfam profile: PF00847 F     | 257675_at | -0.9 |
| Expressed protein ; supported by cDNA: gi_13877954_gb_AF370240.1_AF370240                                                                     | 257647_at | -0.9 |
| unknown protein ; supported by full-length cDNA: Ceres: 2194.                                                                                 | 257270_at | -0.9 |
| GATA transcription factor 1 (AtGATA-1) identical to GATA transcription factor 1 (AtGATA-1) GB:Y13648 [Arabidopsis thaliana];supported by      | 256916_at | -0.9 |
| RNA-binding protein (cp33) identical to RNA-binding protein (cp33) GB:BAA06523 [Arabidopsis thaliana] (Plant Mol. Biol. 27 (3), 529-539 (     | 256678_at | -0.9 |
| unknown protein ; supported by full-length cDNA: Ceres: 33058.                                                                                | 256680_at | -0.9 |
| hypothetical protein ; supported by full-length cDNA: Ceres: 14577.                                                                           | 256569_at | -0.9 |
| unknown protein ;supported by full-length cDNA: Ceres:99625.                                                                                  | 256525_at | -0.9 |
| putative nucleic acid binding protein similar to nucleic acid binding protein Alfin-1 GB:AAA20093 [Medicago sativa]; supported by full-length | 256414_at | -0.9 |
| actin 11 (ACT11) identical to actin 11 (ACT11) SP:P53496 (Plant J. 10:189-202(1996));supported by full-length cDNA: Ceres:38101.              | 256275_at | -0.9 |
| GTP-binding protein (SAR1B) identical to GTP-binding protein (SAR1B) [Arabidopsis thaliana (Mouse-ear cress)] SP:Q01474; supported by         | 256224_at | -0.9 |
| unknown protein ; supported by full-length cDNA: Ceres: 22928.                                                                                | 256225_at | -0.9 |
| calcium-binding protein, putative similar to calcium-binding protein GI:6901652 from [Olea europaea];supported by full-length cDNA: Ceres:    | 256129_at | -0.9 |
| unknown protein contains Pfam profile: PF00254 FKBP-type peptidyl-prolyl cis-trans isomerases;supported by full-length cDNA: Ceres:4206       | 256130_at | -0.9 |
| unknown protein ; supported by cDNA: gi_16648676_gb_AY058114.1_                                                                               | 255960_at | -0.9 |

|                                                                                                                                          |             |      |
|------------------------------------------------------------------------------------------------------------------------------------------|-------------|------|
| scarecrow-like 6 (SCL6)                                                                                                                  | 255698_at   | -0.9 |
| putative DNA-binding protein similar to wild oat DNA-binding protein ABF2, GenBank accession number Z48431                               | 255596_at   | -0.9 |
| Expressed protein ; supported by full-length cDNA: Ceres: 28726.                                                                         | 255554_at   | -0.9 |
| putative vacuolar ATPase similar to vacuolar ATPase, GenBank accession number P50408;supported by full-length cDNA: Ceres:10207.         | 255498_at   | -0.9 |
| RMA1 RING zinc finger protein identical to RMA1 gi:3164222; supported by cDNA: gi_3164221_djb_AB008518.1_AB008518                        | 255381_at   | -0.9 |
| coded for by A. thaliana cDNA T44741                                                                                                     | 255255_at   | -0.9 |
| translation initiation factor IF-1, putative similar to translation initiation factor IF-1 GI:124198 from [Spinacia oleracea]            | 254910_at   | -0.9 |
| Ribosomal protein L7Ae -like various L7Ae ribosomal proteins; supported by full-length cDNA: Ceres: 33381.                               | 254831_at   | -0.9 |
| ammonium transport protein (AMT1) ; supported by cDNA: gi_14335079_gb_AY037219.1_                                                        | 254723_at   | -0.9 |
| putative pectinacetyltransferase pectinacetyltransferase precursor, Vigna radiata, PIR2:S68805                                           | 254573_at   | -0.9 |
| putative protein FKBP-type peptidyl-prolyl cis-trans isomerase,Synechocystis sp., PIR2:S75144                                            | 254545_at   | -0.9 |
| endomembrane-associated protein ; supported by full-length cDNA: Ceres: 20592.                                                           | 254492_at   | -0.9 |
| V-ATPase subunit G (vag2 gene)                                                                                                           | 254216_at   | -0.9 |
| hypothetical protein                                                                                                                     | 254116_at   | -0.9 |
| putative protein                                                                                                                         | 254117_at   | -0.9 |
| transcriptional activator CBF1 CRT CRE binding factor 1 involved in low-temperature-responsive gene expression00; supported by cDNA: ζ   | 254074_at   | -0.9 |
| beta-carotene hydroxylase ; supported by cDNA: gi_9230269_gb_AF125576.1_AF125576                                                         | 254020_at   | -0.9 |
| putative protein ;supported by full-length cDNA: Ceres:5367.                                                                             | 253981_at   | -0.9 |
| putative protein                                                                                                                         | 253927_at   | -0.9 |
| hypothetical protein ;supported by full-length cDNA: Ceres:31287.                                                                        | 253546_at   | -0.9 |
| Expressed protein ; supported by cDNA: gi_15028200_gb_AY045923.1_                                                                        | 253551_at   | -0.9 |
| putative protein predicted protein, Arabidopsis thaliana, PATCHX:G2252634                                                                | 253475_at   | -0.9 |
| ubiquinol-cytochrome c reductase - like protein ubiquinol-cytochrome c reductase - Solanum tuberosum, X79276; supported by full-length c | 253436_at   | -0.9 |
| hypothetical protein                                                                                                                     | 253367_at   | -0.9 |
| Expressed protein ; supported by cDNA: gi_16648998_gb_AY059869.1_                                                                        | 253342_at   | -0.9 |
| male sterility 2-like protein male sterility protein 2, Brassica napus, gb:X99922; supported by cDNA: gi_16323106_gb_AY057657.1_         | 253309_at   | -0.9 |
| putative ribosomal protein S16 ribosomal protein S16, Neurospora crassa, PIR2:A29927; supported by full-length cDNA: Ceres: 29919.       | 253201_at   | -0.9 |
| ribosomal - like protein ribosomal protein L12, Liberobacter africanum, U09675;supported by full-length cDNA: Ceres:41011.               | 253058_at   | -0.9 |
| homeobox protein HAT22 ;supported by full-length cDNA: Ceres:36691.                                                                      | 253038_at   | -0.9 |
| putative protein                                                                                                                         | 252688_at   | -0.9 |
| putative protein predicted proteins, Arabidopsis thaliana                                                                                | 252683_at   | -0.9 |
| putative protein                                                                                                                         | 252659_at   | -0.9 |
| protein kinase - like receptor-like protein kinase RLK3, Arabidopsis thaliana, EMBL:ATH011674                                            | 252549_at   | -0.9 |
| putative protein several hypothetical proteins - Arabidopsis thaliana                                                                    | 252475_s_at | -0.9 |
| small zinc finger-like protein TIM9 ;supported by full-length cDNA: Ceres:9070.                                                          | 252479_at   | -0.9 |
| putative protein ;supported by full-length cDNA: Ceres:25829.                                                                            | 252463_at   | -0.9 |
| Expressed protein ; supported by cDNA: gi_14326548_gb_AF385728.1_AF385728                                                                | 252390_at   | -0.9 |
| B12D-like protein B12D protein - Hordeum vulgare,PIR2:S60284                                                                             | 252348_at   | -0.9 |
| Expressed protein ; supported by full-length cDNA: Ceres: 3817.                                                                          | 252352_at   | -0.9 |
| anthranilate N-hydroxycinnamoyl/benzoyltransferase - like protein anthranilate N-hydroxycinnamoyl/benzoyltransferase, Dianthus caryophy  | 252199_at   | -0.9 |
| putative protein EREBP-3 homolog, Stylosanthes hamata, EMBL:U91982; supported by cDNA: gi_15010555_gb_AY045579.1_                        | 252214_at   | -0.9 |
| zinc finger protein zinc finger protein ID1, Zea mays, EMBL:AF058757                                                                     | 252175_at   | -0.9 |
| calmodulin-like protein flagellar calmodulin - Naegleria gruberi, PID:g458232; supported by cDNA: gi_166647_gb_L12115.1_ATHCALLGA        | 252136_at   | -0.9 |
| peroxiredoxin - like protein peroxiredoxin TPx2, Arabidopsis thaliana, EMBL:AF121356; supported by cDNA: gi_15292892_gb_AY050880.1       | 251993_at   | -0.9 |
| putative protein thioredoxin-like protein, Homo sapiens, AJ010841; supported by cDNA: gi_14326509_gb_AF385708.1_AF385708                 | 251815_at   | -0.9 |
| putative protein ferritin 2 precursor - Vigna unguiculata, PIR:T08124;supported by full-length cDNA: Ceres:33282.                        | 251735_at   | -0.9 |
| putative protein hypothetical protein At2g41240 - Arabidopsis thaliana, EMBL:AC005662                                                    | 251677_at   | -0.9 |
| putative protein hypothetical protein SPBC19C2.12 - Schizosaccharomyces pombe, PIR:T39803;supported by full-length cDNA: Ceres:922       | 251483_at   | -0.9 |
| putative protein hypothetical protein At2g44080 - Arabidopsis thaliana, EMBL:AC004005                                                    | 251436_at   | -0.9 |
| putative protein COP1-interacting protein CIP8 - Arabidopsis thaliana, EMBL:AF162150                                                     | 251454_at   | -0.9 |
| putative protein chloroplast Cpn21 protein - Arabidopsis thaliana, EMBL:ATH010818;supported by full-length cDNA: Ceres:35721.            | 251425_at   | -0.9 |
| shaggy-like kinase beta                                                                                                                  | 251358_at   | -0.9 |
| MADS-box protein AGL13 ; supported by cDNA: gi_862641_gb_U20183.1_ATU20183                                                               | 251312_at   | -0.9 |



|                                                                                                                                           |             |      |
|-------------------------------------------------------------------------------------------------------------------------------------------|-------------|------|
| RAV-like protein DNA-binding protein RAV1 - Arabidopsis thaliana, EMBL:AB013886;supported by full-length cDNA: Ceres:13757.               | 251302_at   | -0.9 |
| Expressed protein ; supported by full-length cDNA: Ceres: 22246.                                                                          | 250922_at   | -0.9 |
| putative protein predicted proteins, Archaeoglobus fulgidus, Synechocystis sp.;supported by full-length cDNA: Ceres:125255.               | 250842_at   | -0.9 |
| putative protein similar to unknown protein (pir T12959);supported by full-length cDNA: Ceres:252000.                                     | 250707_at   | -0.9 |
| putative protein                                                                                                                          | 250575_at   | -0.9 |
| separation anxiety protein - like separation anxiety protein, Drosophila melanogaster, EMBL:AF225902                                      | 250390_at   | -0.9 |
| putative protein                                                                                                                          | 250263_at   | -0.9 |
| transporter-like protein                                                                                                                  | 250248_at   | -0.9 |
| AMP-binding protein                                                                                                                       | 250114_s_at | -0.9 |
| thioredoxin f2 (gb AAD35004.1) ; supported by cDNA: gi_4973253_gb_AF144386.1_AF144386                                                     | 250133_at   | -0.9 |
| unknown protein ; supported by cDNA: gi_14190364_gb_AF378860.1_AF378860                                                                   | 250099_at   | -0.9 |
| putative protein predicted proteins, Drosophila melanogaster;supported by full-length cDNA: Ceres:41525.                                  | 249988_at   | -0.9 |
| tub family-like protein tubby-like protein - Lemna paucicostata, EMBL:AB023895                                                            | 250001_at   | -0.9 |
| putative protein various predicted proteins                                                                                               | 249920_at   | -0.9 |
| CCR4-associated factor-like protein                                                                                                       | 249928_at   | -0.9 |
| pectinacetyltransferase                                                                                                                   | 249807_at   | -0.9 |
| putative protein similar to unknown protein (pir S76575)                                                                                  | 249685_at   | -0.9 |
| hypothetical protein                                                                                                                      | 249499_at   | -0.9 |
| hypothetical protein ;supported by full-length cDNA: Ceres:17485.                                                                         | 249472_at   | -0.9 |
| hypothetical protein ; supported by full-length cDNA: Ceres: 2842.                                                                        | 249424_s_at | -0.9 |
| putative protein predicted proteins, Arabidopsis thaliana;supported by full-length cDNA: Ceres:16724.                                     | 249375_at   | -0.9 |
| cytochrome c1 precursor ; supported by cDNA: gi_15215623_gb_AY050340.1_                                                                   | 249324_at   | -0.9 |
| putative protein similar to unknown protein (emb CAB62355.1);supported by full-length cDNA: Ceres:94968.                                  | 249330_at   | -0.9 |
| beta-1,3-glucanase-like protein                                                                                                           | 249214_at   | -0.9 |
| Cys2/His2-type zinc finger protein 3 (dbj BAA85109.1) ;supported by full-length cDNA: Ceres:9878.                                         | 249139_at   | -0.9 |
| putative protein contains similarity to unknown protein (gb AAD21709.1); supported by cDNA: gi_15215714_gb_AY050386.1_                    | 249035_at   | -0.9 |
| unknown protein ;supported by full-length cDNA: Ceres:15495.                                                                              | 248889_at   | -0.9 |
| DNA (cytosine-5)-methyltransferase (DNA methyltransferase) (DNA metase) (sp P34881) ; supported by cDNA: gi_304106_gb_L10692.1_           | 248597_at   | -0.9 |
| putative protein strong similarity to unknown protein (gb AAB95234.1)                                                                     | 248502_at   | -0.9 |
| putative protein similar to unknown protein (sp P43335);supported by full-length cDNA: Ceres:8788.                                        | 248449_at   | -0.9 |
| unknown protein                                                                                                                           | 248079_at   | -0.9 |
| putative protein similar to unknown protein (pir  T04270);supported by full-length cDNA: Ceres:110454.                                    | 247980_at   | -0.9 |
| putative protein similar to unknown protein (gb AAF21150.1)                                                                               | 247958_at   | -0.9 |
| light-inducible protein ATLS1-like ;supported by full-length cDNA: Ceres:1152.                                                            | 247943_at   | -0.9 |
| 60S acidic ribosomal protein P3 ; supported by full-length cDNA: Ceres: 8695.                                                             | 247900_at   | -0.9 |
| D-xylose-H <sup>+</sup> symporter - like protein D-xylose-H <sup>+</sup> symporter, Lactobacillus brevis, EMBL:AF045552                   | 247709_at   | -0.9 |
| cytoplasmic ribosomal protein S15a - like cytoplasmic ribosomal protein S15a, Arabidopsis thaliana, EMBL:ATAF1412;supported by full-len   | 247654_at   | -0.9 |
| zinc finger protein Zat12 ;supported by full-length cDNA: Ceres:40576.                                                                    | 247655_at   | -0.9 |
| zinc finger protein - like dof6 zinc finger protein, Arabidopsis thaliana, PIR:T47501;supported by full-length cDNA: Ceres:20852.         | 247625_at   | -0.9 |
| putative phytochelatin synthetase - like putative phytochelatin synthetase, Arabidopsis thaliana, EMBL:ATH6787                            | 247604_at   | -0.9 |
| adenylate kinase ;supported by full-length cDNA: Ceres:13667.                                                                             | 247382_at   | -0.9 |
| unknown protein                                                                                                                           | 247252_at   | -0.9 |
| receptor protein kinase-like protein                                                                                                      | 247153_at   | -0.9 |
| SCARECROW gene regulator                                                                                                                  | 247057_at   | -0.9 |
| E2, ubiquitin-conjugating enzyme, putative ubiquitin-conjugating enzyme, Pichia pastoris, PIR:A53848; supported by full-length cDNA: Cere | 246862_at   | -0.9 |
| putative protein predicted protein, Arabidopsis thaliana; supported by full-length cDNA: Ceres: 108472.                                   | 246744_at   | -0.9 |
| ribosomal protein S21 - like ribosomal protein S21, Zea mays, PIR:T03945;supported by full-length cDNA: Ceres:93174.                      | 246747_at   | -0.9 |
| copper amine oxidase, putative similar to copper amine oxidase Gl:685197 from [Pisum sativum]                                             | 246601_at   | -0.9 |
| copper amine oxidase, putative similar to copper amine oxidase Gl:3819099 from [Cicer arietinum]                                          | 246603_at   | -0.9 |
| CARBONIC ANHYDRASE 2 ; supported by cDNA: gi_13265565_gb_AF324712.2_AF324712                                                              | 246596_at   | -0.9 |
| glycine/proline-rich protein glycine/proline-rich protein GPRP - Arabidopsis thaliana, EMBL:X84315                                        | 246440_at   | -0.9 |
| hypothetical protein                                                                                                                      | 246346_at   | -0.9 |
| beta-D-glucan exohydrolase - like protein beta-D-glucan exohydrolase, Nicotiana tabacum, EMBL:AB017502                                    | 246184_at   | -0.9 |

|                                                                                                                                            |             |      |
|--------------------------------------------------------------------------------------------------------------------------------------------|-------------|------|
| ribosomal protein L7Ae-like NHP2/RS6 FAMILY PROTEIN YEL026W HOMOLOG - Homo sapiens, EMBL:D50420;supported by full-length                   | 246070_at   | -0.9 |
| NAM-like protein hypothetical protein SENU5, senescence up-regulated - Lycopersicon esculentum, EMBL:Z75524; supported by cDNA: gi         | 245987_at   | -0.9 |
| defender against cell death protein, putative similar to defender against cell death protein GB:AAC36169 GI:3608136 from [Arabidopsis tha  | 245791_at   | -0.9 |
| unknown protein similar to GP 2104534 AF001308 (T10M13.11)                                                                                 | 245176_at   | -0.9 |
| hypothetical protein predicted by genscan                                                                                                  | 245029_at   | -0.9 |
| hypothetical protein                                                                                                                       | 244961_at   | -0.9 |
| orf153b orf153b                                                                                                                            | 244923_s_at | -0.9 |
| putative protein contains similarity to unknown protein (pir  T05568)                                                                      | 247182_at   | -0.9 |
| putative expansin ;supported by full-length cDNA: Ceres:17353.                                                                             | 267590_at   | -0.8 |
| putative heme A:farnesyltransferase ; supported by cDNA: gi_15028298_gb_AY045952.1_                                                        | 267342_at   | -0.8 |
| hypothetical protein predicted by genefinder; supported by cDNA: gi_14334633_gb_AY034990.1_                                                | 267279_at   | -0.8 |
| hypothetical protein                                                                                                                       | 267293_at   | -0.8 |
| calmodulin-like protein identical to GB:D45848; supported by cDNA: gi_15983405_gb_AF424577.1_AF424577                                      | 267083_at   | -0.8 |
| unknown protein                                                                                                                            | 267018_at   | -0.8 |
| unknown protein ; supported by cDNA: gi_14335015_gb_AY037187.1_                                                                            | 266982_at   | -0.8 |
| hypothetical protein predicted by genscan                                                                                                  | 266916_at   | -0.8 |
| unknown protein                                                                                                                            | 266825_at   | -0.8 |
| putative alcohol dehydrogenase                                                                                                             | 266761_at   | -0.8 |
| unknown protein ;supported by full-length cDNA: Ceres:26967.                                                                               | 266716_at   | -0.8 |
| putative ribosomal protein L28 ; supported by cDNA: gi_15292670_gb_AY050769.1_                                                             | 266699_at   | -0.8 |
| putative tryptophanyl-tRNA synthetase                                                                                                      | 266648_at   | -0.8 |
| unknown protein ; supported by cDNA: gi_15081683_gb_AY048234.1_                                                                            | 266521_at   | -0.8 |
| hypothetical protein predicted by genefinder                                                                                               | 266545_at   | -0.8 |
| unknown protein ; supported by cDNA: gi_13605586_gb_AF361619.1_AF361619                                                                    | 266551_at   | -0.8 |
| unknown protein                                                                                                                            | 266512_at   | -0.8 |
| glutathione S-transferase (GST6) identical to GB:X95295. Based on identical cDNA hits, the translation is now 40 AAs longer at the N-termi | 266461_at   | -0.8 |
| unknown protein ; supported by cDNA: gi_16649150_gb_AY059945.1_                                                                            | 266481_at   | -0.8 |
| hypothetical protein predicted by genscan                                                                                                  | 266358_at   | -0.8 |
| hypothetical protein predicted by genefinder                                                                                               | 266345_at   | -0.8 |
| hypothetical protein predicted by genscan;supported by full-length cDNA: Ceres:8450.                                                       | 266311_at   | -0.8 |
| 60S acidic ribosomal protein P2 ;supported by full-length cDNA: Ceres:36076.                                                               | 266256_at   | -0.8 |
| 60S acidic ribosomal protein P2 ;supported by full-length cDNA: Ceres:19986.                                                               | 266258_at   | -0.8 |
| 60S ribosomal protein L10A ; supported by cDNA: gi_13430467_gb_AF360146.1_AF360146                                                         | 266210_at   | -0.8 |
| unknown protein                                                                                                                            | 265953_at   | -0.8 |
| unknown protein                                                                                                                            | 265620_at   | -0.8 |
| unknown protein                                                                                                                            | 265539_at   | -0.8 |
| unknown protein ;supported by full-length cDNA: Ceres:27566.                                                                               | 265386_at   | -0.8 |
| putative photosystem I reaction center subunit IV ;supported by full-length cDNA: Ceres:27629.                                             | 265287_at   | -0.8 |
| hypothetical protein predicted by genscan and genefinder;supported by full-length cDNA: Ceres:3673.                                        | 265278_at   | -0.8 |
| glutathione transferase, putative similar to glutathione S-transferase GB: AAF22517 GI:6652870 from [Papaver somniferum];supported by f    | 264986_at   | -0.8 |
| hypothetical protein similar to carnitine racemase like protein GI:7268149 from [Arabidopsis thaliana]                                     | 264627_at   | -0.8 |
| putative histone H2A Strong similarity to Picea histone H2A (gb X67819). ESTs gb ATTS3874.gb T46627.gb T14194 come from this gene;s        | 264651_at   | -0.8 |
| unknown protein Similar to Glycine SRC2 (gb AB000130). ESTs gb H76869.gb T21700.gb ATTS5089 come from this gene; supported by c            | 264655_at   | -0.8 |
| hypothetical protein Contains similarity to Rattus AMP-activated protein kinase (gb X95577); supported by cDNA: gi_9965728_gb_AF25033      | 264625_at   | -0.8 |
| sugar carrier protein, putative similar to sugar carrier protein GI:169735 from [Ricinus communis]                                         | 264482_at   | -0.8 |
| Expressed protein ; supported by full-length cDNA: Ceres: 22723.                                                                           | 264441_at   | -0.8 |
| putative transcription factor similar to transcription factor SF3 (pir IS37656); similar to ESTs gb T42207, gb N37716, and emb Z17491;supp | 264462_at   | -0.8 |
| hypothetical protein predicted by genscan+                                                                                                 | 264337_at   | -0.8 |
| histone H2A, putative similar to histone H2A GI:3204129 from [Cicer arietinum];supported by full-length cDNA: Ceres:16879.                 | 264188_at   | -0.8 |
| unknown protein ;supported by full-length cDNA: Ceres:37537.                                                                               | 264201_at   | -0.8 |
| hypothetical protein predicted by genemark.hmm                                                                                             | 264179_at   | -0.8 |
| putative cyclin-dependent kinase regulatory subunit ;supported by full-length cDNA: Ceres:5750.                                            | 264070_at   | -0.8 |
| putative steroid sulfotransferase ; supported by cDNA: gi_599639_emb_Z46823.1_ATTS4391                                                     | 264042_at   | -0.8 |

|                                                                                                                                               |             |      |
|-----------------------------------------------------------------------------------------------------------------------------------------------|-------------|------|
| Expressed protein ; supported by full-length cDNA: Ceres: 20090.                                                                              | 264023_at   | -0.8 |
| Expressed protein ; supported by full-length cDNA: Ceres: 29157.                                                                              | 263840_at   | -0.8 |
| cysteine proteinase similar to cysteine proteinase RD19A (thiol protease) Gl:435618, SP:P43296 from [Arabidopsis thaliana];supported by f     | 263757_at   | -0.8 |
| metalloproteinase, putative similar to metalloproteinase Gl:3128477 from [Arabidopsis thaliana]                                               | 263731_at   | -0.8 |
| unknown protein ;supported by full-length cDNA: Ceres:14471.                                                                                  | 263737_at   | -0.8 |
| unknown protein ESTs gb N65789.gb T04628 come from this gene;supported by full-length cDNA: Ceres:28606.                                      | 263660_at   | -0.8 |
| unknown protein                                                                                                                               | 263467_at   | -0.8 |
| unknown protein ;supported by full-length cDNA: Ceres:6899.                                                                                   | 263305_at   | -0.8 |
| ubiquitin extension protein (UBQ2) identical to Gl:166930, Gl:166931; supported by cDNA: gi_13430797_gb_AF360311.1_AF360311                   | 263289_at   | -0.8 |
| putative vacuolar proton-ATPase 16 kDa proteolipid identical to GB:L44581                                                                     | 263267_at   | -0.8 |
| acetyl-CoA carboxylase, putative similar to acetyl-CoA carboxylase Gl:1100253 from [Arabidopsis thaliana]                                     | 263193_at   | -0.8 |
| SKP1/ASK1 (At1) identical to Skp1a Gl:3068807, Skp1p Gl:1432083 and UIP1 Gl:3719209 from [Arabidopsis thaliana]                               | 262676_at   | -0.8 |
| ribonuclease contains similarity to RNase Gl:7768564 from [Nicotiana tabacum]                                                                 | 262657_at   | -0.8 |
| putative 60s ribosomal protein L37 almost identical to GB:Q43292;supported by full-length cDNA: Ceres:11912.                                  | 262594_at   | -0.8 |
| hypothetical protein similar to hypothetical protein GB:CAB36801 Gl:4455265 from [Arabidopsis thaliana]; supported by full-length cDNA: Ce    | 262457_at   | -0.8 |
| cytochrome P450, putative similar to cytochrome P450 Gl:4688670 from [Catharanthus roseus]                                                    | 262426_s_at | -0.8 |
| unknown protein ;supported by full-length cDNA: Ceres:33047.                                                                                  | 262399_at   | -0.8 |
| hypothetical protein predicted by genemark.hmm; supported by full-length cDNA: Ceres: 10855.                                                  | 262411_at   | -0.8 |
| unknown protein identical to residues 1 to 141 of unknown protein GB:AAD55491 (Arabidopsis thaliana)                                          | 262288_at   | -0.8 |
| hypothetical protein predicted by genemark.hmm                                                                                                | 262251_at   | -0.8 |
| hypothetical protein predicted by genemark.hmm; supported by full-length cDNA: Ceres: 19044.                                                  | 262127_at   | -0.8 |
| unknown protein ;supported by full-length cDNA: Ceres:35811.                                                                                  | 262049_at   | -0.8 |
| Expressed protein ; supported by full-length cDNA: Ceres: 7260.                                                                               | 262058_at   | -0.8 |
| unknown protein                                                                                                                               | 261926_at   | -0.8 |
| unknown protein ; supported by full-length cDNA: Ceres: 42087.                                                                                | 261902_at   | -0.8 |
| DAG protein, putative similar to DAG protein Gl:1200204 from [Antirrhinum majus]; supported by full-length cDNA: Ceres: 35647.                | 261824_at   | -0.8 |
| chloroplast drought-induced stress protein, putative similar to chloroplast drought-induced stress protein Gl:2582821 from [Solanum tuberos   | 261751_at   | -0.8 |
| acidic ribosomal protein, putative similar to 60S ACIDIC RIBOSOMAL PROTEIN P1 GB:O23095 from [Arabidopsis thaliana];supported by fi           | 261578_at   | -0.8 |
| histone H4 identical to GB:M36659 from [Zea mays] (Plant Physiol. Biochem. 25, 235-247 (1987));supported by full-length cDNA: Ceres:27        | 261408_s_at | -0.8 |
| ribosomal protein S15 identical to GB:AAA61608 from [Arabidopsis thaliana] (Plant Physiol. 106 (1), 401-402 (1994)); supported by full-leng   | 261416_at   | -0.8 |
| catechol O-methyltransferase, putative similar to catechol O-methyltransferase Gl:4808524 from [Thalictrum tuberosum]                         | 261216_at   | -0.8 |
| unknown protein ; supported by cDNA: gi_15450636_gb_AY052686.1_                                                                               | 261193_at   | -0.8 |
| ornithine carbamoyltransferase precursor identical to SP:O50039 from [Arabidopsis thaliana]; supported by cDNA: gi_2764517_emb_AJ000          | 261122_at   | -0.8 |
| hypothetical protein predicted by genemark.hmm; supported by full-length cDNA: Ceres: 13874.                                                  | 261057_at   | -0.8 |
| hypothetical protein contains similarity to mitochondrial inner membrane protease subunit 1 GB:P28627 from [Saccharomyces cerevisiae]         | 260972_at   | -0.8 |
| unknown protein contains similarity to calcium-binding protein GB:CAB63264 Gl:6580549 from [Lotus japonicus]; supported by cDNA: gi_13        | 260881_at   | -0.8 |
| hypothetical protein predicted by genemark.hmm;supported by full-length cDNA: Ceres:29740.                                                    | 260867_at   | -0.8 |
| signal recognition particle 19 kDa protein subunit, putative similar to GB:U19030 from [Oryza sativa] (Plant Mol. Biol. 34 (3), 507-515 (1997 | 260726_at   | -0.8 |
| expressed protein ; supported by full-length cDNA: Ceres: 256275.                                                                             | 260708_at   | -0.8 |
| membrane related protein CP5, putative similar to GB:AAD28760 from [Arabidopsis thaliana]; supported by cDNA: gi_16604620_gb_AY05             | 260603_at   | -0.8 |
| putative molybdopterin synthase large subunit ; supported by cDNA: gi_13605721_gb_AF361842.1_AF361842                                         | 260572_at   | -0.8 |
| Expressed protein ; supported by full-length cDNA: Ceres: 105765.                                                                             | 260409_at   | -0.8 |
| putative B-box zinc finger protein contains Pfam profile: PF00643 B-box zinc finger;supported by full-length cDNA: Ceres:108109.              | 260266_at   | -0.8 |
| E2, ubiquitin-conjugating enzyme, putative similar to putative protein GB:CAB43411 [Arabidopsis thaliana];supported by full-length cDNA: C    | 260180_at   | -0.8 |
| unknown protein                                                                                                                               | 260081_at   | -0.8 |
| unknown protein supported by cDNA: Ceres:13335                                                                                                | 260072_at   | -0.8 |
| unknown protein                                                                                                                               | 259847_at   | -0.8 |
| hypothetical protein predicted by genemark.hmm;supported by full-length cDNA: Ceres:21940.                                                    | 259663_at   | -0.8 |
| short chain alcohol dehydrogenase, putative similar to Gl:2739279 from [Nicotiana tabacum] (Plant Mol. Biol. 29 (5), 1027-1038 (1995))        | 259669_at   | -0.8 |
| hypothetical protein ; supported by cDNA: gi_14596112_gb_AY042844.1_                                                                          | 259515_at   | -0.8 |
| unknown protein ;supported by full-length cDNA: Ceres:17545.                                                                                  | 259474_at   | -0.8 |
| hypothetical protein predicted using genefinder;supported by full-length cDNA: Ceres:20442.                                                   | 259340_at   | -0.8 |
| unknown protein ; supported by cDNA: gi_16604552_gb_AY059721.1_                                                                               | 259349_at   | -0.8 |

|                                                                                                                                                 |             |      |
|-------------------------------------------------------------------------------------------------------------------------------------------------|-------------|------|
| unknown protein similar to MICROSOMAL SIGNAL PEPTIDASE GB:P28687 from [Gallus gallus];supported by full-length cDNA: Ceres:151                  | 259307_at   | -0.8 |
| putative small nuclear ribonucleoprotein polypeptide G similar to small nuclear ribonucleoprotein polypeptide G GB:4507133 [Homo sapiens        | 259288_at   | -0.8 |
| unknown protein ; supported by full-length cDNA: Ceres: 29837.                                                                                  | 259236_at   | -0.8 |
| hypothetical protein predicted by genscan;supported by full-length cDNA: Ceres:9503.                                                            | 259253_at   | -0.8 |
| unknown protein similar to putative protein GB:CAB36768 [Arabidopsis thaliana];supported by full-length cDNA: Ceres:8898.                       | 259013_at   | -0.8 |
| GTP cyclohydrolase I similar to GTP cyclohydrolase I GB:P22288 [Rattus norvegicus]; contains Pfam profile: PF01227 GTP cyclohydrolase           | 258834_at   | -0.8 |
| hypothetical protein predicted by genefinder;supported by full-length cDNA: Ceres:8992.                                                         | 258792_at   | -0.8 |
| hypothetical protein supported by full-length cDNA: Ceres:4427.                                                                                 | 258793_at   | -0.8 |
| unknown protein                                                                                                                                 | 258699_at   | -0.8 |
| unknown protein ; supported by full-length cDNA: Ceres: 9458.                                                                                   | 258681_at   | -0.8 |
| ribosomal protein L29, putative similar to 60S ribosomal protein L29 GB:P25886 from [Rattus norvegicus]                                         | 258521_at   | -0.8 |
| sterol-C5-desaturase identical to GB:AAD12944 from [Arabidopsis thaliana];supported by full-length cDNA: Ceres:7564.                            | 258484_at   | -0.8 |
| unknown protein ;supported by full-length cDNA: Ceres:6694.                                                                                     | 258491_at   | -0.8 |
| unknown protein contains Pfam profile: PF00106 short chain dehydrogenase                                                                        | 258467_at   | -0.8 |
| unknown protein                                                                                                                                 | 258418_at   | -0.8 |
| beta-glucosidase, putative similar to beta-glucosidase BGQ60 precursor GB:A57512 [Hordeum vulgare];supported by full-length cDNA: Cer           | 258151_at   | -0.8 |
| expansin At-EXP5 identical to expansin At-EXP5 GB:AAB38071 from [Arabidopsis thaliana]; supported by cDNA: gi_1041703_gb_U30478.                | 258003_at   | -0.8 |
| unknown protein ;supported by full-length cDNA: Ceres:41112.                                                                                    | 257966_at   | -0.8 |
| unknown protein ;supported by full-length cDNA: Ceres:270508.                                                                                   | 257750_at   | -0.8 |
| hypothetical protein predicted by genemark.hmm                                                                                                  | 257728_at   | -0.8 |
| histone H3, putative similar to histone H3 GB:P05203 [Petroselinum crispum]; supported by cDNA: gi_14335141_gb_AY037250.1_                      | 257714_at   | -0.8 |
| Expressed protein ; supported by cDNA: gi_15810238_gb_AY056158.1_                                                                               | 257706_at   | -0.8 |
| unknown protein ; supported by cDNA: gi_15146273_gb_AY049278.1_                                                                                 | 257272_at   | -0.8 |
| hypothetical protein ;supported by full-length cDNA: Ceres:7140.                                                                                | 257214_at   | -0.8 |
| cytochrome c, putative similar to cytochrome c1 GB:S66866 from [Solanum tuberosum];supported by full-length cDNA: Ceres:41320.                  | 257148_at   | -0.8 |
| non-race specific disease resistance protein, putative contains non-consensus CT donor splice site at exon 1; potential pseudogene; similar     | 257083_s_at | -0.8 |
| ribosomal protein L27, putative similar to 60S RIBOSOMAL PROTEIN L27 GB:P41101 from [Solanum tuberosum];supported by full-length                | 256794_at   | -0.8 |
| unknown protein ;supported by full-length cDNA: Ceres:8544.                                                                                     | 256785_at   | -0.8 |
| glutamyl-tRNA amidotransferase subunit A, putative similar to GB:P73558 from [Synechocystis PCC6803] (DNA Res. 3 (3), 109-136 (1996);           | 256728_at   | -0.8 |
| ribosomal protein L41 identical to ribosomal protein L41 GB:AAA79268 [Pisum sativum]                                                            | 256438_s_at | -0.8 |
| hypothetical protein                                                                                                                            | 256373_at   | -0.8 |
| unknown protein similar to hypothetical protein GI:1469227 from [Brassica oleracea];supported by full-length cDNA: Ceres:94809.                 | 256191_at   | -0.8 |
| putative FKBP-type peptidyl-prolyl cis-trans isomerase predicted by genscan+                                                                    | 256088_at   | -0.8 |
| predicted protein ; supported by cDNA: gi_15027984_gb_AY045849.1_                                                                               | 256093_at   | -0.8 |
| AP2 domain transcription factor, putative similar to AP2 domain transcription factor GI:4567204 from [Arabidopsis thaliana]                     | 256009_at   | -0.8 |
| UDP-glucose glucosyltransferase identical to UDP-glucose glucosyltransferase GI:3928543 from [Arabidopsis thaliana]; supported by cDNA          | 255942_at   | -0.8 |
| zinc-finger protein (C-terminal), putative similar to zinc-finger protein (C-terminal) GI:558542 from [Glycine max];supported by full-length cD | 255899_at   | -0.8 |
| hypothetical protein predicted by genscan+;supported by full-length cDNA: Ceres:232413.                                                         | 255775_at   | -0.8 |
| putative YABBY3 axial regulator ; supported by cDNA: gi_14335013_gb_AY037186.1_                                                                 | 255709_at   | -0.8 |
| Expressed protein ; supported by full-length cDNA: Ceres: 18459.                                                                                | 255633_at   | -0.8 |
| P II nitrogen sensing protein GLB I ; supported by cDNA: gi_3885942_gb_AF095455.1_AF095455                                                      | 255558_at   | -0.8 |
| Expressed protein ; supported by full-length cDNA: Ceres: 1734.                                                                                 | 255104_at   | -0.8 |
| arabinogalactan-protein homolog arabinogalactan-protein - Arabidopsis thaliana,PID:g3883126; supported by cDNA: gi_10880496_gb_AF               | 255080_at   | -0.8 |
| putative ribosomal protein L9, cytosolic ribosomal protein L9, cytosolic - garden pea, PIR2:S19978;supported by full-length cDNA: Ceres:21      | 254980_at   | -0.8 |
| ras-like GTP-binding protein strong homology to GTP-binding protein ric2, Oryza sativa, S38741                                                  | 254641_at   | -0.8 |
| putative protein ; supported by cDNA: gi_15292760_gb_AY050814.1_                                                                                | 254561_at   | -0.8 |
| putative protein RNPL, Homo sapiens, PIR2:G01859;supported by full-length cDNA: Ceres:251841.                                                   | 254504_at   | -0.8 |
| translation elongation factor EF-Tu precursor, chloroplast ; supported by cDNA: gi_14334791_gb_AY035069.1_                                      | 254480_at   | -0.8 |
| reticuline oxidase -like protein reticuline oxidase, Eschscholzia californica, PIR:A41533; supported by cDNA: gi_15983492_gb_AF424621.1         | 254432_at   | -0.8 |
| putative protein light induced protein homolog, Arabidopsis thaliana, PATCHX:E326816;supported by full-length cDNA: Ceres:35323.                | 254358_at   | -0.8 |
| adenine phosphoribosyltransferase (EC 2.4.2.7) - like protein adenine phosphoribosyltransferase, Triticum aestivum, T06263; supported by        | 254328_at   | -0.8 |
| putative mitochondrial uncoupling protein mitochondrial uncoupling protein, Arabidopsis thaliana (thale cress), PATX:E1316826;supported         | 254120_at   | -0.8 |
| DRE CRT-binding protein DREB1C involved in low-temperature-responsive gene expression00; supported by cDNA: gi_3738227_dbj_AB0C                 | 254075_at   | -0.8 |

|                                                                                                                                            |           |      |
|--------------------------------------------------------------------------------------------------------------------------------------------|-----------|------|
| Expressed protein ; supported by full-length cDNA: Ceres: 31814.                                                                           | 253825_at | -0.8 |
| putative protein ;supported by full-length cDNA: Ceres:1968.                                                                               | 253766_at | -0.8 |
| ribosomal protein S15a homolog ribosomal protein S15a - Brassica napus,PIR2:S20945; supported by full-length cDNA: Ceres: 18105.           | 253726_at | -0.8 |
| acid phosphatase-like protein acid phosphatase-1 (EC 3.1.3.-) - Lycopersicon esculentum,PIR2:T06587; supported by cDNA: gi_1529302         | 253731_at | -0.8 |
| Expressed protein ; supported by full-length cDNA: Ceres: 26443.                                                                           | 253694_at | -0.8 |
| putative protein ; supported by full-length cDNA: Ceres: 23017.                                                                            | 253537_at | -0.8 |
| Expressed protein ; supported by cDNA: gi_13926316_gb_AF372908.1_AF372908                                                                  | 253482_at | -0.8 |
| putative protein predicted protein, Caenorhabditis elegans, gb:Z70780;supported by full-length cDNA: Ceres:8739.                           | 253385_at | -0.8 |
| Expressed protein ; supported by full-length cDNA: Ceres: 109432.                                                                          | 253302_at | -0.8 |
| Expressed protein ; supported by full-length cDNA: Ceres: 24629.                                                                           | 253291_at | -0.8 |
| putative protein ;supported by full-length cDNA: Ceres:8742.                                                                               | 253272_at | -0.8 |
| ribosomal protein L11 homolog several ribosomal proteins L11;supported by full-length cDNA: Ceres:95636.                                   | 253138_at | -0.8 |
| putative amino acid transport protein amino acid transport protein - Arabidopsis thaliana, PID:g2576363;supported by full-length cDNA: Cer | 253006_at | -0.8 |
| putative protein phosphatase-2c protein phosphatase-2c (PP2C) - Mesembryanthemum crystallinum, PID:g3608412                                | 252992_at | -0.8 |
| Expressed protein ; supported by cDNA: gi_15451093_gb_AY054627.1_                                                                          | 253001_at | -0.8 |
| putative zinc finger protein salt-tolerance protein - Arabidopsis thaliana, PID:e224078                                                    | 252924_at | -0.8 |
| putative protein ;supported by full-length cDNA: Ceres:4740.                                                                               | 252942_at | -0.8 |
| putative protein ;supported by full-length cDNA: Ceres:20457.                                                                              | 252850_at | -0.8 |
| Expressed protein ; supported by full-length cDNA: Ceres: 22456.                                                                           | 252823_at | -0.8 |
| leucine-rich repeat protein LRP -like leucine-rich repeat protein LRP, tomato, PIR:T07079                                                  | 252703_at | -0.8 |
| cysteine proteinase contains similarity to cysteine proteinase RD21A (thiol protease) GI:435619, SP:P43297 from [Arabidopsis thaliana];su  | 252692_at | -0.8 |
| putative protein cim1 induced allergen, Glycine max, EMBL:U03860;supported by full-length cDNA: Ceres:27534.                               | 252563_at | -0.8 |
| putative protein mitochondrial ATP SYNTHASE 6 KD SUBUNIT - Solanum tuberosum, SWISSPROT:P80497                                             | 252524_at | -0.8 |
| Expressed protein ; supported by full-length cDNA: Ceres: 157151.                                                                          | 252412_at | -0.8 |
| protein translocation complex sec61 gamma chain-like protein translocation complex sec61 gamma chain, endoplasmic reticulum - i            | 252324_at | -0.8 |
| putative protein sugar transporter 2, Drosophila melanogaster, EMBL:AF199484                                                               | 252308_at | -0.8 |
| putative protein ; supported by full-length cDNA: Ceres: 40302.                                                                            | 252234_at | -0.8 |
| putative protein steroid dehydrogenase homolog - Homo sapiens, EMBL:AF078850;supported by full-length cDNA: Ceres:34560.                   | 252167_at | -0.8 |
| Expressed protein ; supported by full-length cDNA: Ceres: 26994.                                                                           | 252181_at | -0.8 |
| putative protein 1 photosystem II oxygen-evolving complex photosystem II oxygen-evolving complex protein 1 - potato, PIR2:S16586;suppc     | 252130_at | -0.8 |
| putative protein hypothetical protein F10M6.70 - Arabidopsis thaliana,PIR3:T05399; supported by cDNA: gi_15293266_gb_AY051067.1_           | 252040_at | -0.8 |
| E2, ubiquitin-conjugating enzyme, putative UEV1Bs - Homo sapiens,PID:g2689608;supported by full-length cDNA: Ceres:16125.                  | 252059_at | -0.8 |
| RNA-binding protein cp29 protein ;supported by full-length cDNA: Ceres:38888.                                                              | 251956_at | -0.8 |
| leucoanthocyanidin dioxygenase -like protein leucoanthocyanidin dioxygenase, apple tree, PIR:S33144                                        | 251770_at | -0.8 |
| mandelonitrile lyase-like protein ADHESION OF CALYX EDGES (ACE) - Arabidopsis thaliana; supported by cDNA: gi_15982754_gb_AY05             | 251746_at | -0.8 |
| 40S ribosomal protein S26 homolog several 40S ribosomal protein S26; supported by cDNA: gi_14532523_gb_AY039886.1_                         | 251737_at | -0.8 |
| putative protein ;supported by full-length cDNA: Ceres:12522.                                                                              | 251640_at | -0.8 |
| Expressed protein ; supported by full-length cDNA: Ceres: 22956.                                                                           | 251602_at | -0.8 |
| putative protein CND41, chloroplast nucleoid DNA binding protein - Nicotiana tabacum, EMBL:D26015; supported by cDNA: gi_15983375_         | 251507_at | -0.8 |
| 60S RIBOSOMAL PROTEIN L38-like protein 60S RIBOSOMAL PROTEIN L38 - Lycopersicon esculentum, EMBL:X69979; supported by cD                   | 251486_at | -0.8 |
| putative protein transcription factor Pti6 - Lycopersicon esculentum, PIR:T07728;supported by full-length cDNA: Ceres:100688.              | 251282_at | -0.8 |
| putative protein nucleoid DNA-binding protein cnd41, chloroplast - Nicotiana tabacum, EMBL:D26015; supported by cDNA: gi_14532549_g        | 251287_at | -0.8 |
| ribosomal protein L35 - like ribosomal protein L35- cytosolic, Arabidopsis thaliana, PIR:T00549;supported by full-length cDNA: Ceres:1452f | 251007_at | -0.8 |
| putative protein contains similarity to unknown protein (gb)AAF19573.1);supported by full-length cDNA: Ceres:118003.                       | 250810_at | -0.8 |
| putative protein similar to unknown protein (emb)CAB88044.1)                                                                               | 250821_at | -0.8 |
| putative protein strong similarity to unknown protein (pir)T12704)                                                                         | 250745_at | -0.8 |
| unknown protein ; supported by full-length cDNA: Ceres: 17482.                                                                             | 250668_at | -0.8 |
| transcription factor-like protein ethylene responsive element binding factor 5 - Arabidopsis thaliana, EMBL:AB008107; supported by cDNA:   | 250582_at | -0.8 |
| putative protein                                                                                                                           | 250562_at | -0.8 |
| inorganic pyrophosphatase - like protein cytosolic inorganic pyrophosphatase, Homo sapiens, EMBL:AF108211;supported by full-length cD      | 250496_at | -0.8 |
| putative protein ; supported by cDNA: gi_15028030_gb_AY045872.1_                                                                           | 250368_at | -0.8 |
| putative GTP-binding protein GTP-binding protein CGPA, Caulobacter crescentus, EMBL:AF084242; supported by full-length cDNA: Ceres         | 250383_at | -0.8 |
| mitochondrial phosphate translocator                                                                                                       | 250206_at | -0.8 |

|                                                                                                                                               |           |      |
|-----------------------------------------------------------------------------------------------------------------------------------------------|-----------|------|
| Expressed protein ; supported by full-length cDNA: Ceres: 13951.                                                                              | 250225_at | -0.8 |
| isopentenyl pyrophosphate:dimethylallyl pyrophosphate isomerase                                                                               | 250117_at | -0.8 |
| putative protein; similar to unknown protein (gb AAF26969.1)                                                                                  | 250076_at | -0.8 |
| chloroplast GrpE protein ; supported by cDNA: gi_13878046_gb_AF370286.1_AF370286                                                              | 250061_at | -0.8 |
| putative protein rsc43, Dictyostelium discoideum, EMBL:AF011338;supported by full-length cDNA: Ceres:6084.                                    | 249984_at | -0.8 |
| putative protein predicted proteins, Arabidopsis thaliana;supported by full-length cDNA: Ceres:32414.                                         | 249987_at | -0.8 |
| putative protein similar to unknown protein (emb CAB88996.1); supported by full-length cDNA: Ceres: 7688.                                     | 249943_at | -0.8 |
| 40S ribosomal protein S11 ;supported by full-length cDNA: Ceres:33187.                                                                        | 249795_at | -0.8 |
| 60S ribosomal protein L13 ; supported by cDNA: gi_14190434_gb_AF378895.1_AF378895                                                             | 249815_at | -0.8 |
| putative protein similar to unknown protein (gb AAD29063.1)                                                                                   | 249777_at | -0.8 |
| unknown protein                                                                                                                               | 249726_at | -0.8 |
| CRS2 -like protein CRS2, Zea mays, EMBL:AF225708                                                                                              | 249554_at | -0.8 |
| dihydroxyacetone 3-phosphate reductase (dhaprd)                                                                                               | 249366_at | -0.8 |
| putative protein contains similarity to metallothionein-I gene transcription activator                                                        | 249335_at | -0.8 |
| putative protein contains similarity to 40S ribosomal protein S10; supported by cDNA: gi_14335121_gb_AY037240.1_                              | 249310_at | -0.8 |
| Expressed protein ; supported by cDNA: gi_13605534_gb_AF361593.1_AF361593                                                                     | 249268_at | -0.8 |
| putative protein strong similarity to unknown protein (gb AAF04433.1)                                                                         | 249220_at | -0.8 |
| Nicotiana lesion-inducing like ; supported by full-length cDNA: Ceres: 327.                                                                   | 249159_at | -0.8 |
| aluminum-induced protein-like ; supported by full-length cDNA: Ceres: 12484.                                                                  | 249121_at | -0.8 |
| putative protein similar to unknown protein (pir T38261)                                                                                      | 249085_at | -0.8 |
| putative protein similar to unknown protein (pir T04247)                                                                                      | 248877_at | -0.8 |
| phosphate/triose-phosphate translocator precursor (gb AAC83815.1) ;supported by full-length cDNA: Ceres:36058.                                | 248886_at | -0.8 |
| ribosomal protein S27 ;supported by full-length cDNA: Ceres:8698.                                                                             | 248747_at | -0.8 |
| 60S ribosomal protein L13a ; supported by full-length cDNA: Ceres:4275.                                                                       | 248655_at | -0.8 |
| amino acid permease 6 (emb CAA65051.1)                                                                                                        | 248619_at | -0.8 |
| protein translocation complex Sec61 gamma chain (pir  T05513) ; supported by cDNA: gi_13877812_gb_AF370169.1_AF370169                         | 248512_at | -0.8 |
| unknown protein ; supported by full-length cDNA: Ceres: 106913.                                                                               | 248219_at | -0.8 |
| unknown protein                                                                                                                               | 248190_at | -0.8 |
| putative protein similar to unknown protein (gb AAC24386.1)                                                                                   | 248191_at | -0.8 |
| unknown protein ; supported by cDNA: gi_16323225_gb_AY057717.1_                                                                               | 248098_at | -0.8 |
| 40S ribosomal protein S30 homolog (emb CAB79697.1)                                                                                            | 247968_at | -0.8 |
| I-box binding factor - like protein I-box binding factor, Lycopersicon esculentum, EMBL:LES243339                                             | 247768_at | -0.8 |
| putative Rab5-interacting protein - like putative Rab5-interacting protein, Homo sapiens, EMBL:AF112213                                       | 247725_at | -0.8 |
| putative protein                                                                                                                              | 247628_at | -0.8 |
| putative protein predicted proteins                                                                                                           | 247611_at | -0.8 |
| putative protein predicted proteins, Arabidopsis thaliana                                                                                     | 247448_at | -0.8 |
| putative protein similar to unknown protein (gb AAF17656.1)                                                                                   | 247399_at | -0.8 |
| Arac10 ; supported by cDNA: gi_3702963_gb_AF079485.1_AF079485                                                                                 | 247405_at | -0.8 |
| CLE21, putative CLAVATA3/ESR-Related 21 (CLE21)                                                                                               | 247254_at | -0.8 |
| GATA-binding transcription factor-like protein                                                                                                | 247086_at | -0.8 |
| putative protein similar to unknown protein (gb AAF64534.1);supported by full-length cDNA: Ceres:4831.                                        | 247037_at | -0.8 |
| putative protein predicted protein, Arabidopsis thaliana                                                                                      | 246885_at | -0.8 |
| mevalonate kinase supported by full-length cDNA: Ceres:1045.                                                                                  | 246778_at | -0.8 |
| sugar transporter-like protein putative sugar transporter (SUGTL2) - Arabidopsis thaliana, EMBL:AJ249968; supported by cDNA: gi_15294         | 246781_at | -0.8 |
| putative protein predicted proteins, Oryza sativa and Arabidopsis thaliana;supported by full-length cDNA: Ceres:20143.                        | 246746_at | -0.8 |
| 40S RIBOSOMAL PROTEIN S19 - like 40S RIBOSOMAL PROTEIN S19 - Oryza sativa, SWISSPROT:RS19_ORYSA;supported by full-len                         | 246538_at | -0.8 |
| putative protein predicted protein, Drosophila melanogaster                                                                                   | 246462_at | -0.8 |
| ADP/ATP translocase-like protein adp/atp translocase - Schizosaccharomyces pombe, PIR:T40526;supported by full-length cDNA: Ceres:3           | 246427_at | -0.8 |
| disease resistance protein RPP1-WsB, putative similar to disease resistance protein RPP1-WsB GI:9279731 from [Arabidopsis thaliana]           | 246405_at | -0.8 |
| calmodulin-3 ;supported by full-length cDNA: Ceres:16715.                                                                                     | 246290_at | -0.8 |
| putative carrier protein peroxisomal Ca-dependent solute carrier - Oryctolagus cuniculus, EMBL:AF004161                                       | 246303_at | -0.8 |
| peptidyl-prolyl cis-trans isomerase - like protein peptidyl-prolyl cis-trans isomerase A.thaliana;supported by full-length cDNA: Ceres:25533. | 246040_at | -0.8 |
| putative protein predicted protein, Arabidopsis thaliana, EMBL:ATZ86095;supported by full-length cDNA: Ceres:158575.                          | 246043_at | -0.8 |

|                                                                                                                                         |             |      |
|-----------------------------------------------------------------------------------------------------------------------------------------|-------------|------|
| putative protein predicted proteins, Drosophila melanogaster and Caenorhabditis elegans                                                 | 246015_at   | -0.8 |
| putative protein predicted protein, Arabidopsis thaliana;supported by full-length cDNA: Ceres:29453.                                    | 245999_at   | -0.8 |
| hypothetical protein predicted by genemark.hmm;supported by full-length cDNA: Ceres:31356.                                              | 245747_at   | -0.8 |
| phosphate/phosphoenolpyruvate translocator - like protein ;supported by full-length cDNA: Ceres:100777.                                 | 245698_at   | -0.8 |
| ribosomal protein ;supported by full-length cDNA: Ceres:15384.                                                                          | 245372_at   | -0.8 |
| elicitor like protein ; supported by full-length cDNA: Ceres: 1718.                                                                     | 245340_at   | -0.8 |
| hypothetical protein ;supported by full-length cDNA: Ceres:17977.                                                                       | 245310_at   | -0.8 |
| hypothetical protein ;supported by full-length cDNA: Ceres:25991.                                                                       | 245316_at   | -0.8 |
| hypothetical protein ;supported by full-length cDNA: Ceres:40736.                                                                       | 245331_at   | -0.8 |
| hypothetical protein ; supported by cDNA: gi_15451033_gb_AY054597.1_                                                                    | 245297_at   | -0.8 |
| tubulin alpha-6 chain (TUA6) ; supported by cDNA: gi_16226461_gb_AF428406.1_AF428406                                                    | 245270_at   | -0.8 |
| putative protein similarity to predicted proteins, Arabidopsis thaliana                                                                 | 245155_at   | -0.8 |
| hypothetical protein predicted by genefinder;supported by full-length cDNA: Ceres:33364.                                                | 245042_at   | -0.8 |
| ribosomal protein S18                                                                                                                   | 244969_at   | -0.8 |
| NADH dehydrogenase subunit 3 Protein sequence is in conflict with the conceptual translation                                            | 244920_s_at | -0.8 |
| hypothetical protein predicted by genemark.hmm, contains Pfam profile:PF00320 GATA:GATA zinc finger                                     | 257571_at   | -0.8 |
| putative cellulose synthase                                                                                                             | 267115_s_at | -0.8 |
| putative non-LTR retroelement reverse transcriptase                                                                                     | 263086_at   | -0.8 |
| phosphoribosyl diphosphate synthase identical to phosphoribosyl diphosphate synthase GI:4902470 from (Arabidopsis thaliana); supported  | 262762_at   | -0.8 |
| hypothetical protein predicted by genemark.hmm;supported by full-length cDNA: Ceres:107869.                                             | 256222_at   | -0.8 |
| hypothetical protein                                                                                                                    | 251676_at   | -0.8 |
| hypothetical protein                                                                                                                    | 245495_at   | -0.8 |
| unknown protein ; supported by full-length cDNA: Ceres: 28982.                                                                          | 267638_at   | -0.7 |
| unknown protein ; supported by full-length cDNA: Ceres: 9990.                                                                           | 267510_at   | -0.7 |
| putative glycerate dehydrogenase ; supported by cDNA: gi_15724345_gb_AF412113.1_AF412113                                                | 267514_at   | -0.7 |
| auxin response transcription factor 3 (ETTIN/ARF3) identical to GB:AF007788; supported by cDNA: gi_12484198_gb_AF336917.1_AF3369        | 267452_at   | -0.7 |
| unknown protein ; supported by cDNA: gi_13899086_gb_AF370538.1_AF370538                                                                 | 267379_at   | -0.7 |
| unknown protein                                                                                                                         | 267348_at   | -0.7 |
| unknown protein                                                                                                                         | 267323_at   | -0.7 |
| hypothetical protein predicted by genscan and genefinder;supported by full-length cDNA: Ceres:20125.                                    | 267294_at   | -0.7 |
| putative acetone-cyanohydrin lyase                                                                                                      | 267126_s_at | -0.7 |
| putative acetyltransferase                                                                                                              | 267145_at   | -0.7 |
| unknown protein                                                                                                                         | 267055_at   | -0.7 |
| 60S ribosomal protein L35 ;supported by full-length cDNA: Ceres:11583.                                                                  | 266980_at   | -0.7 |
| 60S ribosomal protein L23A identical to GB:AF034694;supported by full-length cDNA: Ceres:22479.                                         | 266981_at   | -0.7 |
| unknown protein ; supported by full-length cDNA: Ceres: 10164.                                                                          | 266789_at   | -0.7 |
| ribonuclease, RNS1 identical to ribonuclease SP:P42813, GI:561998 from [Arabidopsis thaliana]; supported by full-length cDNA: Ceres:272 | 266743_at   | -0.7 |
| hypothetical protein predicted by grail                                                                                                 | 266678_at   | -0.7 |
| glycine decarboxylase complex H-protein identical to GB:U27144;supported by full-length cDNA: Ceres:24194.                              | 266636_at   | -0.7 |
| putative glutaredoxin ;supported by full-length cDNA: Ceres:21006.                                                                      | 266516_at   | -0.7 |
| unknown protein                                                                                                                         | 266445_at   | -0.7 |
| protease inhibitor II ; supported by cDNA: gi_15293090_gb_AY050979.1_                                                                   | 266118_at   | -0.7 |
| putative small nuclear ribonucleoprotein E ;supported by full-length cDNA: Ceres:24619.                                                 | 266074_at   | -0.7 |
| predicted protein                                                                                                                       | 266012_s_at | -0.7 |
| putative ribose 5-phosphate isomerase ; supported by cDNA: gi_15809809_gb_AY054172.1_                                                   | 265742_at   | -0.7 |
| putative replication protein A1 ;supported by full-length cDNA: Ceres:7536.                                                             | 265695_at   | -0.7 |
| hypothetical protein predicted by genefinder                                                                                            | 265426_at   | -0.7 |
| hypothetical protein predicted by genefinder;supported by full-length cDNA: Ceres:15103.                                                | 265442_at   | -0.7 |
| E2, ubiquitin-conjugating enzyme, putative ;supported by full-length cDNA: Ceres:27679.                                                 | 265357_at   | -0.7 |
| hypothetical protein predicted by genscan;supported by full-length cDNA: Ceres:4845.                                                    | 265333_at   | -0.7 |
| putative ribosomal protein L6 ; supported by full-length cDNA: Ceres: 692.                                                              | 265338_at   | -0.7 |
| hypothetical protein similar to embryo-abundant protein GB:L47672 GI:1350530 from [Picea glauca]; supported by cDNA: gi_14335021_gb_    | 265075_at   | -0.7 |
| unknown protein Contains similarity to hypothetical mitochondrial import receptor subunit gb Z98597 from S. pombe. ESTs gb T45575 and g | 265041_at   | -0.7 |

|                                                                                                                                              |             |      |
|----------------------------------------------------------------------------------------------------------------------------------------------|-------------|------|
| hypothetical protein predicted by genefinder; supported by cDNA: gi_15028340_gb_AY045973.1_                                                  | 265028_at   | -0.7 |
| putative protein hypothetical proteins - Arabidopsis thaliana                                                                                | 264991_s_at | -0.7 |
| unknown protein similar to leucine-rich repeat protein GB:AAC79105; supported by cDNA: gi_12083225_gb_AF332409.1_AF332409                    | 264840_at   | -0.7 |
| putative thioredoxin-m similar to thioredoxin m-type precursor; similar to ESTs gb T13714, gb H76398, gb N37762, gb AA042639, gb T211C       | 264845_at   | -0.7 |
| hypothetical protein predicted by genscan                                                                                                    | 264803_at   | -0.7 |
| putative calcium-dependent protein kinase (U90439) similar to ESTs gb T46119, gb H76837, and gb H36948; supported by cDNA: gi_6318           | 264783_at   | -0.7 |
| putative cytochrome C strong similarity to GB:P00050 and GB:CAB39628; supported by full-length cDNA: Ceres: 31770.                           | 264727_at   | -0.7 |
| putative auxin-induced protein, IAA12 similar to GB:S58498; supported by full-length cDNA: Ceres:40608.                                      | 264605_at   | -0.7 |
| putative GTP-binding protein ; supported by cDNA: gi_1292907_gb_U41295.1_ATU41295                                                            | 264593_at   | -0.7 |
| SKP1/ASK1 (At18), putative similar to Skp1 homolog Skp1a GI:3068807 [Arabidopsis thaliana]; supported by full-length cDNA: Ceres:2720:       | 264465_at   | -0.7 |
| unknown protein Similar to gb U85207 snRNP core Sm protein homolog Sm-X5 from Mus musculus. EST gb AA612141 comes from this ge               | 264364_at   | -0.7 |
| unknown protein strong similarity to hypothetical protein gb Y09823 from A. thaliana. ESTs gb T76118, gb T04263 and gb ATYU9823 come         | 264207_at   | -0.7 |
| latex-abundant protein, putative similar to latex-abundant protein GI:4235430 from (Hevea brasiliensis)                                      | 264178_at   | -0.7 |
| hypothetical protein predicted by genemark.hmm                                                                                               | 264130_at   | -0.7 |
| unknown protein contains similarity to alpha-A-globin GI:212911 from [Cairina moschata]                                                      | 264134_at   | -0.7 |
| putative MADS-box protein                                                                                                                    | 263995_at   | -0.7 |
| putative triosephosphate isomerase ; supported by full-length cDNA: Ceres:39351.                                                             | 264018_at   | -0.7 |
| putative auxin-regulated protein ; supported by full-length cDNA: Ceres:7141.                                                                | 264021_at   | -0.7 |
| hypothetical protein predicted by graiI; supported by full-length cDNA: Ceres:2928.                                                          | 263980_at   | -0.7 |
| putative phosphoprotein phosphatase ; supported by cDNA: gi_16930440_gb_AF419574.1_AF419574                                                  | 263990_at   | -0.7 |
| putative cis-Golgi SNARE protein ; supported by full-length cDNA: Ceres:2416.                                                                | 263839_at   | -0.7 |
| putative 60s ribosomal protein L10 Nearly identical to ribosomal protein L10.e, Wilm s tumor suppressor homologue, gi 17682 (Z15157), ho     | 263686_at   | -0.7 |
| unknown protein Similar to Nicotiana lesion-inducing ORF (gb U66269)                                                                         | 263651_at   | -0.7 |
| hypothetical protein predicted by genscan and genefinder; supported by full-length cDNA: Ceres:7520.                                         | 263637_at   | -0.7 |
| hypothetical protein predicted by genscan and genefinder; supported by full-length cDNA: Ceres:8550.                                         | 263597_at   | -0.7 |
| NAM (no apical meristem)-like protein similar to petunia NAM (X92205) and A. thaliana sequences ATAF1 (X74755) and ATAF2 (X74756);           | 263584_at   | -0.7 |
| AtRer1B ; supported by full-length cDNA: Ceres:92908.                                                                                        | 263516_at   | -0.7 |
| hypothetical protein predicted by genscan                                                                                                    | 263370_at   | -0.7 |
| unknown protein ; supported by cDNA: gi_15982806_gb_AY057510.1_                                                                              | 263298_at   | -0.7 |
| Expressed protein ; supported by full-length cDNA: Ceres: 264189.                                                                            | 263209_at   | -0.7 |
| ribosomal protein L13, putative similar to ribosomal protein L13 GI:170132 from [Spinacia oleracea]; supported by full-length cDNA: Ceres:3  | 263131_at   | -0.7 |
| 60s ribosomal protein I27a. similar to 60S RIBOSOMAL PROTEIN L27A GB:P49637 GI:1710530 from [Arabidopsis thaliana]; supported by f           | 262985_s_at | -0.7 |
| rubredoxin, putative similar to rubredoxin GI:4583668 from [Guillardia theta]; supported by full-length cDNA: Ceres:19234.                   | 262954_at   | -0.7 |
| hypothetical protein predicted by genemark.hmm; supported by cDNA: gi_15292930_gb_AY050899.1_                                                | 262953_at   | -0.7 |
| purple acid phosphatase, putative contains Pfam profile: PF02227 Purple acid phosphatase                                                     | 262830_at   | -0.7 |
| putative obtusifolios 14-alpha demethylase strong similarity to gb U74319 obtusifolios 14-alpha demethylase (CYP51) from Sorghum bicolor     | 262820_at   | -0.7 |
| thioredoxin, putative similar to thioredoxin GI:142153 from [Synechococcus PCC6301]                                                          | 262721_at   | -0.7 |
| calmodulin, putative similar to calmodulin-6 SP:Q03509 [Arabidopsis thaliana (Mouse-ear cress)]                                              | 262639_at   | -0.7 |
| phosphoprotein phosphatase identical to phosphoprotein phosphatase GB:AAD50050 GI:5734785 from [Arabidopsis thaliana]; supported by          | 262476_at   | -0.7 |
| hypothetical protein similar to hypothetical protein GB:AAD50047 GI:5734782 from [Arabidopsis thaliana]; supported by full-length cDNA: Ce   | 262417_at   | -0.7 |
| hypothetical protein contains similarity to disulphide isomerase GI:4581959 from [Caenorhabditis briggsae]; supported by cDNA: gi_166490     | 262413_at   | -0.7 |
| hypothetical protein similar to hypothetical protein GB:AAF24576 GI:6692111 from [Arabidopsis thaliana]                                      | 262329_at   | -0.7 |
| unknown protein identical to unknown protein GB:AAD55493 (Arabidopsis thaliana); supported by cDNA: gi_13358235_gb_AF325047.2_AF             | 262262_at   | -0.7 |
| putative G protein coupled receptor identical to putative G protein coupled receptor GI:2104224 from [Arabidopsis thaliana]; supported by cI | 262234_at   | -0.7 |
| unknown protein ; supported by full-length cDNA: Ceres:6082.                                                                                 | 262162_at   | -0.7 |
| hypothetical protein predicted by genemark.hmm                                                                                               | 262085_at   | -0.7 |
| hypothetical protein predicted by genemark.hmm; supported by full-length cDNA: Ceres: 22656.                                                 | 261898_at   | -0.7 |
| unknown protein                                                                                                                              | 261843_at   | -0.7 |
| Expressed protein ; supported by full-length cDNA: Ceres: 40238.                                                                             | 261756_at   | -0.7 |
| unknown protein ; supported by full-length cDNA: Ceres: 20257.                                                                               | 261723_at   | -0.7 |
| clathrin coat assembly protein AP17, putative similar to clathrin coat assembly protein AP17 GB:CAA65533 GI:2959358 from [Zea mays]          | 261733_at   | -0.7 |
| hypothetical protein identical to hypothetical protein GB:AAF19740 GI:6634732 from [Arabidopsis thaliana]; supported by full-length cDNA: C  | 261738_s_at | -0.7 |
| unknown protein similar to putative esterase GB:AAD17422 GI:4335745 from [Arabidopsis thaliana]; supported by full-length cDNA: Ceres:12     | 261608_at   | -0.7 |



|                                                                                                                                                |             |      |
|------------------------------------------------------------------------------------------------------------------------------------------------|-------------|------|
| unknown protein                                                                                                                                | 261477_at   | -0.7 |
| hypothetical protein contains similarity to cytochrome c oxidase subunit I GI:5678701 from [Loligo pealei]; supported by full-length cDNA: Ce  | 261489_at   | -0.7 |
| unknown protein                                                                                                                                | 261422_at   | -0.7 |
| NAM (no apical meristem)-like protein OsNAC4, putative similar to NAM (no apical meristem)-like protein OsNAC4 GI:6730938 from [Oryza          | 261393_at   | -0.7 |
| RAC-like GTP-binding protein ARAC4 identical to SP:Q38919 from [Arabidopsis thaliana]; supported by cDNA: gi_1304416_gb_U45236.1_              | 261229_at   | -0.7 |
| tubulin alpha-2/alpha-4 chain identical to SP:P29510 from [Arabidopsis thaliana]; supported by cDNA: gi_16648843_gb_AY058199.1_                | 261129_at   | -0.7 |
| CLE9, putative CLAVATA3/ESR-Related 9 (CLE9); similar to hypothetical protein GB:AAF67770 GI:7705091 from [Arabidopsis thaliana];su            | 261012_at   | -0.7 |
| unknown protein                                                                                                                                | 260904_at   | -0.7 |
| unknown protein ; supported by full-length cDNA: Ceres: 11793.                                                                                 | 260767_s_at | -0.7 |
| hypothetical protein predicted by genemark.hmm                                                                                                 | 260715_at   | -0.7 |
| Expressed protein ; supported by full-length cDNA: Ceres: 252174.                                                                              | 260707_s_at | -0.7 |
| unknown protein                                                                                                                                | 260281_at   | -0.7 |
| putative heat shock protein similar to GrpE protein from [Arabidopsis thaliana];supported by full-length cDNA: Ceres:40701.                    | 260125_at   | -0.7 |
| unknown protein ;supported by full-length cDNA: Ceres:151718.                                                                                  | 260106_at   | -0.7 |
| unknown protein ;supported by full-length cDNA: Ceres:33367.                                                                                   | 259955_s_at | -0.7 |
| Expressed protein ; supported by full-length cDNA: Ceres: 253509.                                                                              | 259933_at   | -0.7 |
| predicted protein                                                                                                                              | 259738_at   | -0.7 |
| putative ribose 5-phosphate isomerase similar to ribose 5-phosphate isomerase GB:6677767 from [Mus musculus];supported by full-length i        | 259749_at   | -0.7 |
| putative isoprenylated protein similar to ATPF7 GB:AAD09511;supported by full-length cDNA: Ceres:39127.                                        | 259753_at   | -0.7 |
| unknown protein similar to phosphate translocators: glucose-6-phosphate/phosphate-translocator precursor GB:AAC08524 [Zea mays], phc           | 259713_at   | -0.7 |
| unknown protein ;supported by full-length cDNA: Ceres:17287.                                                                                   | 259267_at   | -0.7 |
| putative 60S ribosomal protein L22 similar to 60S ribosomal protein L22 GB:AAF02883; supported by full-length cDNA: Ceres: 8244.               | 259112_at   | -0.7 |
| putative ribosomal protein s19 or s24 similar to ribosomal protein S19 GB:445612 [Solanum tuberosum] and similar to ribosomal protein S24      | 259090_at   | -0.7 |
| putative glucan endo-1-3-beta-glucosidase similar to glucan endo-1-3-beta-glucosidase precursor GB:P52409 [Triticum aestivum];supportec        | 259014_at   | -0.7 |
| putative chlorophyll a/b-binding protein similar to chlorophyll a/b-binding protein (CP29) GB:S33443 [Arabidopsis thaliana], identical to Lhcb | 258993_at   | -0.7 |
| putative syntaxin contains Pfam profile: PF00804 syntaxin;supported by full-length cDNA: Ceres:38899.                                          | 258786_at   | -0.7 |
| ethylene-responsive protein, putative similar to ER6 protein GB:AAD46412 GI:5669654 from (Lycopersicon esculentum); supported by full-l        | 258727_at   | -0.7 |
| unknown protein similar to putative protein GB:BAA84809 from [Oryza sativa]                                                                    | 258706_at   | -0.7 |
| unknown protein                                                                                                                                | 258654_at   | -0.7 |
| hypothetical protein predicted by genscan;supported by full-length cDNA: Ceres:19531.                                                          | 258657_at   | -0.7 |
| putative protein kinase contains Pfam profiles: PF00069 Eukaryotic protein kinase domain, PF00560 Leucine Rich Repeat (5 copies); supp         | 258616_at   | -0.7 |
| unknown protein                                                                                                                                | 258519_at   | -0.7 |
| putative 40S ribosomal protein similar to ribosomal protein S7 GB:AAD26256 from [Secale cereale];supported by full-length cDNA: Ceres:3C       | 258486_at   | -0.7 |
| putative flowering-time gene CONSTANS (COL2) identical to putative flowering-time gene CONSTANS (COL2) GB:AAB67879 GI:1507699                  | 258497_at   | -0.7 |
| unknown protein similar to unknown protein GB:AAF30339 from [Arabidopsis thaliana];supported by full-length cDNA: Ceres:22328.                 | 258393_at   | -0.7 |
| transport inhibitor response 1 (TIR1), putative similar to transport inhibitor response 1 GI:2352492 from [Arabidopsis thaliana]               | 258311_at   | -0.7 |
| unknown protein                                                                                                                                | 258232_at   | -0.7 |
| unknown protein                                                                                                                                | 258171_at   | -0.7 |
| Expressed protein ; supported by full-length cDNA: Ceres: 15880.                                                                               | 258135_at   | -0.7 |
| unknown protein ; supported by cDNA: gi_7658238_gb_AF198179.1_AF198179                                                                         | 257913_at   | -0.7 |
| unknown protein contains similarity to auxin-induced protein GB:P33082 from [Glycine max]                                                      | 257690_at   | -0.7 |
| 50S ribosomal protein L12-C identical to ribosomal protein L12 GB:X68046 [Arabidopsis thaliana] (J. Biol. Chem. 269 (10), 7330-7336 (199       | 257225_s_at | -0.7 |
| putative glucosyltransferase similar to UDP-glucose glucosyltransferase GB:X77459 [Manihot esculenta], UDP-glycose:flavonoid glycosyltr:       | 257205_at   | -0.7 |
| 30S ribosomal protein S10, putative similar to 30S ribosomal protein S10 GB:P02364 [Escherichia coli] (est matches suggest the N-termina       | 257190_at   | -0.7 |
| E2, ubiquitin-conjugating enzyme, putative similar to ubiquitin-conjugating enzyme GB:Q95044 [Spisula solidissima]                             | 257126_at   | -0.7 |
| unknown protein                                                                                                                                | 257088_at   | -0.7 |
| prefoldin-like protein similar to prefoldin subunit 2 GB:AAF17218 from [Homo sapiens]; supported by full-length cDNA: Ceres: 264413.           | 256936_at   | -0.7 |
| glycine-rich RNA binding protein, putative similar to glycine-rich RNA binding protein 2 (AtGRP2) GB:CAA05727 [Arabidopsis thaliana]; con      | 256890_at   | -0.7 |
| Expressed protein ; supported by full-length cDNA: Ceres: 8691.                                                                                | 256856_at   | -0.7 |
| ADP-ribosylation factor, putative similar to ADP-ribosylation factor GB:P91924 [Dugesia japonica]; supported by full-length cDNA: Ceres: 2:    | 256838_at   | -0.7 |
| omega-3 fatty acid desaturase, chloroplast precursor identical to omega-3 fatty acid desaturase, chloroplast precursor SP:P46310 (Arabido      | 256417_s_at | -0.7 |
| unknown protein ; supported by full-length cDNA: Ceres: 2031.                                                                                  | 256342_at   | -0.7 |
| DnaJ protein, putative contains Pfam profile: PF00226 DnaJ domain                                                                              | 256320_at   | -0.7 |

|                                                                                                                                               |             |      |
|-----------------------------------------------------------------------------------------------------------------------------------------------|-------------|------|
| unknown protein                                                                                                                               | 256286_at   | -0.7 |
| unknown protein ; supported by cDNA: gi_15450991_gb_AY054576.1_                                                                               | 256267_at   | -0.7 |
| unknown protein ;supported by full-length cDNA: Ceres:13451.                                                                                  | 256223_at   | -0.7 |
| epsilon subunit of mitochondrial F1-ATPase identical to epsilon subunit of mitochondrial F1-ATPase [Arabidopsis thaliana] GI:1655486; sup     | 256184_at   | -0.7 |
| guanine nucleotide regulatory protein, putative similar to guanine nucleotide regulatory protein GI:452360 from [Vicia faba]; supported by fu | 256112_at   | -0.7 |
| unknown protein                                                                                                                               | 256046_at   | -0.7 |
| Expressed protein ; supported by full-length cDNA: Ceres: 250775.                                                                             | 256064_at   | -0.7 |
| ribosomal protein S18, putative similar to ribosomal protein S18 GI:38422 from [Homo sapiens]; supported by cDNA: Ceres:27800                 | 255977_at   | -0.7 |
| unknown protein contains similarity to ubiquitin/ribosomal protein GI:1763015 from [Gallus gallus]                                            | 255951_at   | -0.7 |
| AP2 domain containing protein RAP2, putative similar to AP2 domain containing protein RAP2.4 GI:2281633 from [Arabidopsis thaliana]; su       | 255926_at   | -0.7 |
| unknown protein ;supported by full-length cDNA: Ceres:11578.                                                                                  | 255857_at   | -0.7 |
| putative protein predicted protein, Arabidopsis thaliana;supported by full-length cDNA: Ceres:10189.                                          | 255808_at   | -0.7 |
| hypothetical protein similar to putative two-component response regulator protein GI:6623883 from [Arabidopsis thaliana];supported by full-l  | 255734_at   | -0.7 |
| unknown protein ;supported by full-length cDNA: Ceres:22071.                                                                                  | 255718_at   | -0.7 |
| stress-induced protein OZ11 precursor ; supported by cDNA: gi_790582_gb_U20347.1_ATU20347                                                     | 255629_at   | -0.7 |
| coded for by A. thaliana cDNA R64991 ;supported by full-length cDNA: Ceres:19543.                                                             | 255477_at   | -0.7 |
| predicted protein of unknown function ; supported by full-length cDNA: Ceres: 8114.                                                           | 255440_at   | -0.7 |
| putative C-type U1 snRNP similar to U1 small nuclear ribonucleoprotein C;supported by full-length cDNA: Ceres:20753.                          | 255431_at   | -0.7 |
| hypothetical protein ; supported by full-length cDNA: Ceres: 94438.                                                                           | 255130_at   | -0.7 |
| hypothetical protein ;supported by full-length cDNA: Ceres:1354.                                                                              | 254969_at   | -0.7 |
| protein phosphatase type 1 PP1BG ;supported by full-length cDNA: Ceres:20905.                                                                 | 254923_at   | -0.7 |
| hypothetical protein ;supported by full-length cDNA: Ceres:41730.                                                                             | 254721_at   | -0.7 |
| putative protein putative oncogene protein, Homo sapiens, gb:AF026816; supported by full-length cDNA: Ceres: 8361.                            | 254686_at   | -0.7 |
| putative protein                                                                                                                              | 254694_at   | -0.7 |
| putative protein predicted gene M02B7.4, Caenorhabditis elegans, PID:G1572781                                                                 | 254658_at   | -0.7 |
| putative protein NADH oxidoreductase complex I subunit- like protein, Caenorhabditis elegans, AF143152                                        | 254378_at   | -0.7 |
| cytochrome P450 - like protein flavonoid 3 ,5 -hydroxylase Hf1, Petunia x hybrida, PIR2:S38985                                                | 254331_s_at | -0.7 |
| Expressed protein ; supported by full-length cDNA: Ceres: 38360.                                                                              | 254279_at   | -0.7 |
| putative protein annexin VII, Dictyostelium discoideum, PIR1:LUD07                                                                            | 254262_at   | -0.7 |
| putative protein AR411 - Arabidopsis thaliana (thale cress), PID:g1669603; supported by cDNA: gi_13507100_gb_AF272748.1_AF272748              | 254231_at   | -0.7 |
| hypothetical protein ;supported by full-length cDNA: Ceres:29155.                                                                             | 254161_at   | -0.7 |
| putative protein storage protein - Populus deltoides, PIR2:S31580;supported by full-length cDNA: Ceres:8772.                                  | 254163_s_at | -0.7 |
| putative alliin lyase alliin lyase (EC 4.4.1.4) precursor (CYSTEINE SULPHOXIDE LYASE), onion, PIR2:S29301; supported by cDNA: gi_15           | 254125_at   | -0.7 |
| putative protein ;supported by full-length cDNA: Ceres:16463.                                                                                 | 254103_at   | -0.7 |
| putative pathogenesis-related protein gene PR-1 protein - Medicago truncatula, PIR2:S47171                                                    | 254024_at   | -0.7 |
| putative protein centrin, Marsilea vestita;supported by full-length cDNA: Ceres:13072.                                                        | 253915_at   | -0.7 |
| putative protein Cs protein, Drosophila melanogaster, AF091328;supported by full-length cDNA: Ceres:158028.                                   | 253692_at   | -0.7 |
| putative protein predicted protein, Arabidopsis thaliana, PIR2:T01282;supported by full-length cDNA: Ceres:32381.                             | 253644_at   | -0.7 |
| putative protein predicted protein, Arabidopsis thaliana;supported by full-length cDNA: Ceres:154912.                                         | 253636_at   | -0.7 |
| putative protein RING-H2 finger protein RHX1a - Arabidopsis thaliana,PID:g3790591; supported by cDNA: gi_15809839_gb_AY054187.1_              | 253580_at   | -0.7 |
| putative protein hypothetical protein F9F13.130 - Arabidopsis thaliana,PIR2:T10590;supported by full-length cDNA: Ceres:21252.                | 253593_at   | -0.7 |
| putative protein hypothetical protein YDR438w, Saccharomyces cerevisiae, Pir2:S69718; supported by cDNA: gi_15982861_gb_AY057538              | 253467_at   | -0.7 |
| H+-transporting ATP synthase chain 9 - like protein H+-transporting ATP synthase, Spinacia oleracea, PIR2:S34473;supported by full-length     | 253420_at   | -0.7 |
| putative protein ; supported by full-length cDNA: Ceres: 18715.                                                                               | 253230_at   | -0.7 |
| clathrin assembly protein AP19 homolog ;supported by full-length cDNA: Ceres:22906.                                                           | 253199_at   | -0.7 |
| Expressed protein ; supported by full-length cDNA: Ceres: 8360.                                                                               | 253119_at   | -0.7 |
| cysteine proteinase RD19A identical to thiol protease SP:P43296, GI:435618 from [Arabidopsis thaliana];supported by full-length cDNA: Ce      | 252927_at   | -0.7 |
| mitochondrial carrier - like protein AgPET8, Ashbya gossypii, EMBL:AJ006406;supported by full-length cDNA: Ceres:32654.                       | 252878_at   | -0.7 |
| Histon H3 ;supported by full-length cDNA: Ceres:2670.                                                                                         | 252849_at   | -0.7 |
| homeodomain - like protein ; supported by cDNA: gi_15450981_gb_AY054571.1_                                                                    | 252829_at   | -0.7 |
| ribosomal protein S29 - like ribosomal protein S29, rat, PIR:S30298;supported by full-length cDNA: Ceres:2749.                                | 252693_s_at | -0.7 |
| CCR4-associated factor 1-like protein CAF1_MOUSE CCR4-ASSOCIATED FACTOR 1 - Mus musculus, SWISSPROT:CAF1_MOUSE; sup                           | 252679_at   | -0.7 |
| protein kinase-like protein protein kinase - Solanum berthaultii, EMBL:X97980                                                                 | 252646_at   | -0.7 |

|                                                                                                                                         |             |      |
|-----------------------------------------------------------------------------------------------------------------------------------------|-------------|------|
| putative protein                                                                                                                        | 252539_at   | -0.7 |
| phosphoprotein phosphatase ;supported by full-length cDNA: Ceres:32787.                                                                 | 252471_at   | -0.7 |
| putative protein                                                                                                                        | 252419_at   | -0.7 |
| 6-phosphogluconolactonase - like protein 6-phosphogluconolactonase (6PGL ), Homo sapiens, EMBL:HSA243972;supported by full-length       | 252282_at   | -0.7 |
| putative protein ;supported by full-length cDNA: Ceres:118329.                                                                          | 252036_at   | -0.7 |
| Expressed protein ; supported by cDNA: gi_14517465_gb_AY039568.1_                                                                       | 252039_at   | -0.7 |
| ubiquinol--cytochrome-c reductase-like protein ubiquinol--cytochrome-c reductase, 8K chain, potato, PIR:T07369; supported by cDNA: gi_1 | 252012_at   | -0.7 |
| putative protein HSPC058, Homo sapiens, EMBL:AF161543;supported by full-length cDNA: Ceres:12627.                                       | 251773_at   | -0.7 |
| putative protein                                                                                                                        | 251727_at   | -0.7 |
| acetylglutamate kinase-like protein acetylglutamate kinase - Synechocystis sp., PIR:S77509;supported by full-length cDNA: Ceres:40830.  | 251639_at   | -0.7 |
| ribosomal protein S27 ; supported by cDNA: gi_4193381_gb_AF083336.1_AF083336                                                            | 251357_at   | -0.7 |
| 3-methyl-2-oxobutanoate hydroxy-methyl-transferase-like protein ketopantoate hydroxymethyltransferase - Emericella nidulans, EMBL:AF1   | 251320_at   | -0.7 |
| plasma membrane intrinsic protein 1a ;supported by full-length cDNA: Ceres:6690.                                                        | 251324_at   | -0.7 |
| peptidylprolyl isomerase ROC4 ;supported by full-length cDNA: Ceres:29220.                                                              | 251305_at   | -0.7 |
| putative protein outer envelope membrane protein E 6.7 - chloroplast Spinacia oleracea, PIR:A35958; supported by cDNA: gi_15724349_c    | 251155_at   | -0.7 |
| putative protein ;supported by full-length cDNA: Ceres:18955.                                                                           | 251034_at   | -0.7 |
| 60S ribosomal protein - like 60S ribosomal protein L36, Arabidopsis thaliana, EMBL:AC004684;supported by full-length cDNA: Ceres:3090;  | 251018_at   | -0.7 |
| putative protein ; supported by full-length cDNA: Ceres: 270908.                                                                        | 250923_at   | -0.7 |
| putative protein proline-rich protein APG, Arabidopsis thaliana, PIR:S21961; supported by full-length cDNA: Ceres: 13022.               | 250918_at   | -0.7 |
| putative protein ;supported by full-length cDNA: Ceres:13812.                                                                           | 250844_at   | -0.7 |
| 40S ribosomal protein S17 -like 40S ribosomal protein S17, Lycopersicon esculentum, EMBL:AF161704;supported by full-length cDNA: Ce     | 250862_s_at | -0.7 |
| harpin-induced protein-like ; supported by cDNA: gi_9502175_gb_AF264699.1_AF264699                                                      | 250676_at   | -0.7 |
| nucleoid DNA-binding-like protein ;supported by full-length cDNA: Ceres:15560.                                                          | 250661_at   | -0.7 |
| putative protein PTD008, Homo sapiens, EMBL:AF078861;supported by full-length cDNA: Ceres:226.                                          | 250553_at   | -0.7 |
| putative protein predicted proteins, Arabidopsis thaliana;supported by full-length cDNA: Ceres:2344.                                    | 250399_at   | -0.7 |
| putative protein gibberellin-responsive protein CRG16, Cucumis sativus, EMBL:D49413                                                     | 250358_at   | -0.7 |
| putative protein predicted proteins, Arabidopsis thaliana; supported by cDNA: gi_15912332_gb_AY056444.1_                                | 250292_at   | -0.7 |
| putative protein similar to unknown protein (gb AAF63775.1)                                                                             | 250249_at   | -0.7 |
| ribosomal protein L33 - like ribosomal protein L33, Rickettsia prowazekii, PIR:E71650                                                   | 249975_s_at | -0.7 |
| NADH:ubiquinone oxidoreductase - like protein NADH:ubiquinone oxidoreductase PGIV subunit, Homo sapiens, EMBL:AF044953; support         | 249959_at   | -0.7 |
| c-myc binding protein MM-1-like protein ; supported by full-length cDNA: Ceres: 28832.                                                  | 249829_at   | -0.7 |
| hypothetical protein ;supported by full-length cDNA: Ceres:40348.                                                                       | 249625_at   | -0.7 |
| CALMODULIN-RELATED PROTEIN 2, TOUCH-INDUCED (TCH2) ;supported by full-length cDNA: Ceres:25475.                                         | 249583_at   | -0.7 |
| putative protein similar to unknown protein (pir S75762)                                                                                | 249519_at   | -0.7 |
| 50S ribosomal protein L27 ;supported by full-length cDNA: Ceres:152076.                                                                 | 249331_at   | -0.7 |
| beta-1,3-glucanase-like protein ;supported by full-length cDNA: Ceres:11988.                                                            | 249235_at   | -0.7 |
| Expressed protein ; supported by full-length cDNA: Ceres: 6893.                                                                         | 249162_at   | -0.7 |
| putative protein similar to unknown protein (emb CAB89401.1)                                                                            | 249071_at   | -0.7 |
| putative protein similar to unknown protein (gb AAD10670.1)                                                                             | 249072_at   | -0.7 |
| unknown protein ; supported by cDNA: gi_15027902_gb_AY045808.1_                                                                         | 249010_at   | -0.7 |
| subtilisin-like protease                                                                                                                | 248961_at   | -0.7 |
| putative protein similar to unknown protein (pir T05076);supported by full-length cDNA: Ceres:42747.                                    | 248870_at   | -0.7 |
| ATP synthase delta chain, mitochondrial precursor (sp Q96252) ; supported by cDNA: gi_1655483_dbj_D88376.1_D88376                       | 248825_at   | -0.7 |
| Bax inhibitor-1 like ;supported by full-length cDNA: Ceres:36400.                                                                       | 248833_at   | -0.7 |
| acetyl-CoA C-acetyltransferase ; supported by cDNA: gi_16604582_gb_AY059736.1_                                                          | 248690_at   | -0.7 |
| unknown protein ; supported by cDNA: gi_13605737_gb_AF361850.1_AF361850                                                                 | 248588_at   | -0.7 |
| unknown protein ;supported by full-length cDNA: Ceres:27885.                                                                            | 248491_at   | -0.7 |
| unknown protein ; supported by full-length cDNA: Ceres: 266744.                                                                         | 248377_at   | -0.7 |
| putative protein similar to unknown protein (gb AAF34833.1)                                                                             | 248238_at   | -0.7 |
| zinc-binding protein-like ; supported by full-length cDNA: Ceres: 21629.                                                                | 248187_at   | -0.7 |
| 1,4-benzoquinone reductase-like; Trp repressor binding protein-like                                                                     | 248162_at   | -0.7 |
| putative protein similar to unknown protein (pir  B71406);supported by full-length cDNA: Ceres:22343.                                   | 248171_at   | -0.7 |
| putative protein similar to unknown protein (gb AAD32884.1)                                                                             | 248123_at   | -0.7 |

|                                                                                                                                            |             |      |
|--------------------------------------------------------------------------------------------------------------------------------------------|-------------|------|
| putative protein similar to unknown protein (pir T06631)                                                                                   | 248074_at   | -0.7 |
| endoxyloglucan transferase (gb AAD45127.1) ; supported by cDNA: gi_1244751_gb_U43485.1_ATU43485                                            | 247866_at   | -0.7 |
| putative protein COP1-interacting protein CIP8, Arabidopsis thaliana, EMBL:AF162150; supported by cDNA: gi_15450686_gb_AY052711.1          | 247708_at   | -0.7 |
| ring finger protein - like ring finger protein, Cicer arietinum, EMBL:AB026262                                                             | 247595_at   | -0.7 |
| zinc finger protein OBPA - like zinc finger protein OBPA, Arabidopsis thaliana, EMBL:AF155817;supported by full-length cDNA: Ceres:1908    | 247601_at   | -0.7 |
| putative protein ; supported by cDNA: gi_14596034_gb_AY042805.1_                                                                           | 247522_at   | -0.7 |
| Expressed protein ; supported by full-length cDNA: Ceres: 30313.                                                                           | 247434_at   | -0.7 |
| putative protein predicted proteins, Arabidopsis thaliana; supported by full-length cDNA: Ceres: 38273.                                    | 247443_at   | -0.7 |
| permease 1 - like protein permease 1, common ice plant, PIR:T12309; supported by cDNA: gi_14334659_gb_AY035003.1_                          | 247404_at   | -0.7 |
| unknown protein ;supported by full-length cDNA: Ceres:16323.                                                                               | 247373_at   | -0.7 |
| nucleotide diphosphate kinase Ia (emb CAB58230.1) ; supported by cDNA: gi_3063660_gb_AF058391.1_AF058391                                   | 247376_at   | -0.7 |
| pectate lyase ; supported by cDNA: gi_16648839_gb_AY058197.1_                                                                              | 247377_at   | -0.7 |
| 2-oxoglutarate/malate translocator ; supported by cDNA: gi_15810580_gb_AY056329.1_                                                         | 247289_at   | -0.7 |
| unknown protein                                                                                                                            | 247169_at   | -0.7 |
| auxin-induced protein IAA9 (pir  T05902) ;supported by full-length cDNA: Ceres:31563.                                                      | 247148_at   | -0.7 |
| putative protein strong similarity to unknown protein (pir T10240)                                                                         | 247132_at   | -0.7 |
| unknown protein ;supported by full-length cDNA: Ceres:2518.                                                                                | 247006_at   | -0.7 |
| nucleic acid binding protein - like nucleic acid binding protein, Oryza sativa, PIR:T02745;supported by full-length cDNA: Ceres:32443.     | 246856_at   | -0.7 |
| putative protein various predicted bacterial rRNA methylases                                                                               | 246852_at   | -0.7 |
| putative protein predicted proteins, Arabidopsis thaliana;supported by full-length cDNA: Ceres:38304.                                      | 246792_at   | -0.7 |
| 60S ribosomal protein L22 - like ribosomal protein L22 (cytosolic), Rattus norvegicus, PIR:S52084; supported by full-length cDNA: Ceres: 1 | 246745_at   | -0.7 |
| putative cytidine deaminase - like putative cytidine deaminase, Cicer arietinum, EMBL:AJ006764;supported by full-length cDNA: Ceres:372    | 246702_at   | -0.7 |
| unknown protein ; supported by full-length cDNA: Ceres: 34587.                                                                             | 246631_at   | -0.7 |
| putative protein ;supported by full-length cDNA: Ceres:9667.                                                                               | 246441_at   | -0.7 |
| unknown protein ; supported by cDNA: gi_16648790_gb_AY058172.1_                                                                            | 246391_at   | -0.7 |
| hypothetical protein predicted by genemark.hmm                                                                                             | 246410_at   | -0.7 |
| putative protein non-consensus donor splice site GA at exon 1; predicted proteins, Arabidopsis thaliana; supported by cDNA: gi_16209695_   | 246135_at   | -0.7 |
| hypothetical protein (fragment?)                                                                                                           | 246109_at   | -0.7 |
| putative protein CGI-45 protein - Homo sapiens, EMBL:AF151803;supported by full-length cDNA: Ceres:24749.                                  | 246097_at   | -0.7 |
| hypothetical protein ; supported by full-length cDNA: Ceres: 38847.                                                                        | 246074_at   | -0.7 |
| putative protein predicted proteins, Homo sapiens and Caenorhabditis elegans; supported by full-length cDNA: Ceres: 31390.                 | 246008_at   | -0.7 |
| hypothetical protein ;supported by full-length cDNA: Ceres:38657.                                                                          | 245893_at   | -0.7 |
| extensin like protein                                                                                                                      | 245479_at   | -0.7 |
| hypothetical protein ;supported by full-length cDNA: Ceres:16090.                                                                          | 245394_at   | -0.7 |
| ferredoxin ;supported by full-length cDNA: Ceres:22861.                                                                                    | 245347_at   | -0.7 |
| Expressed protein ; supported by full-length cDNA: Ceres: 19973.                                                                           | 245198_at   | -0.7 |
| ribosomal protein S4                                                                                                                       | 245009_at   | -0.7 |
| hypothetical protein                                                                                                                       | 245018_at   | -0.7 |
| hypothetical protein                                                                                                                       | 244903_at   | -0.7 |
| hypothetical protein                                                                                                                       | 244921_s_at | -0.7 |
| DNA-3-methyladenine glycosidase, putative similar to DNA-3-methyladenine glycosidase GB:CAB60736 GI:6434028 from [Staphylococcus           | 257474_at   | -0.7 |
| hypothetical protein predicted by genemark.hmm                                                                                             | 257556_at   | -0.7 |
| unknown protein similar to hypothetical protein GB:CAB55689 GI:5881771 from [Arabidopsis thaliana]                                         | 257578_x_at | -0.7 |
| hypothetical protein Similar to Caenorhabditis hypothetical protein CO7A9.11 (gb Z29094)                                                   | 264644_at   | -0.7 |
| hypothetical protein predicted by genscan+                                                                                                 | 260434_at   | -0.7 |
| hypothetical protein predicted by genemark.hmm, contains Pfam profile:PF00320 GATA zinc finger;supported by full-length cDNA: Ceres:1      | 258529_at   | -0.7 |
| unknown protein ; supported by full-length cDNA: Ceres: 9180.                                                                              | 256256_at   | -0.7 |
| Expressed protein ; supported by full-length cDNA: Ceres: 94923.                                                                           | 245305_at   | -0.7 |
| putative tropinone reductase                                                                                                               | 267573_at   | -0.6 |
| putative C2H2-type zinc finger protein likely a nucleic acid binding protein; supported by cDNA: gi_14517523_gb_AY039597.1_                | 267535_at   | -0.6 |
| putative RING zinc finger protein ;supported by full-length cDNA: Ceres:17402.                                                             | 267297_at   | -0.6 |
| 60S ribosomal protein L36 ;supported by full-length cDNA: Ceres:23114.                                                                     | 267174_at   | -0.6 |
| similar to SOR1 from the fungus Cercospora nicotianae                                                                                      | 267138_s_at | -0.6 |

|                                                                                                                                              |           |      |
|----------------------------------------------------------------------------------------------------------------------------------------------|-----------|------|
| 60S ribosomal protein L18A ; supported by cDNA: gi_14596030_gb_AY042803.1_                                                                   | 267007_at | -0.6 |
| hypothetical protein predicted by genscan                                                                                                    | 266901_at | -0.6 |
| putative expansin Experimental evidence from Dr. Daniel Cosgrove at Penn State Univ. <dCosgrove@psu.edu>                                     | 266770_at | -0.6 |
| 40S ribosomal protein S30 ; supported by cDNA: gi_16974466_gb_AY061910.1_                                                                    | 266705_at | -0.6 |
| hypothetical protein predicted by graal                                                                                                      | 266647_at | -0.6 |
| Expressed protein ; supported by full-length cDNA: Ceres: 9670.                                                                              | 266641_at | -0.6 |
| DegP2 protease identical to DegP2 protease GI:13172275 from [Arabidopsis thaliana]                                                           | 266509_at | -0.6 |
| hypothetical protein predicted by genefinder; supported by cDNA: gi_15215635_gb_AY050346.1_                                                  | 266463_at | -0.6 |
| putative calcium binding protein ;supported by full-length cDNA: Ceres:31535.                                                                | 266447_at | -0.6 |
| putative tropinone reductase                                                                                                                 | 266277_at | -0.6 |
| putative zinc finger protein ;supported by full-length cDNA: Ceres:14203.                                                                    | 266261_at | -0.6 |
| unknown protein ; supported by full-length cDNA: Ceres: 17020.                                                                               | 266138_at | -0.6 |
| putative transport protein SEC61 beta-subunit ; supported by cDNA: gi_13878102_gb_AF370314.1_AF370314                                        | 266105_at | -0.6 |
| hypothetical protein predicted by genscan;supported by full-length cDNA: Ceres:10987.                                                        | 266091_at | -0.6 |
| glycerol-3-phosphate dehydrogenase ; supported by cDNA: gi_15293068_gb_AY050968.1_                                                           | 266058_at | -0.6 |
| unknown protein predicted by genscan and genefinder                                                                                          | 266004_at | -0.6 |
| hypothetical protein predicted by genefinder                                                                                                 | 265777_at | -0.6 |
| RING-H2 finger protein RHA2b identical to GP AF078823; supported by cDNA: gi_3790570_gb_AF078823.1_AF078823                                  | 265740_at | -0.6 |
| putative integral membrane protein                                                                                                           | 265713_at | -0.6 |
| putative myosin heavy chain ; supported by cDNA: gi_15982766_gb_AY057490.1_                                                                  | 265679_at | -0.6 |
| hypothetical protein predicted by genefinder; supported by full-length cDNA: Ceres: 32664.                                                   | 265628_at | -0.6 |
| unknown protein ;supported by full-length cDNA: Ceres:29905.                                                                                 | 265478_at | -0.6 |
| Expressed protein ; supported by full-length cDNA: Ceres: 11006.                                                                             | 265456_at | -0.6 |
| unknown protein ; supported by full-length cDNA: Ceres: 1517.                                                                                | 265416_at | -0.6 |
| unknown protein ; supported by cDNA: gi_13430617_gb_AF360221.1_AF360221                                                                      | 265248_at | -0.6 |
| zinc finger protein 7, ZFP7 ; supported by cDNA: gi_790684_gb_L39650.1_ATHZFPG                                                               | 265029_at | -0.6 |
| hypothetical protein similar to hypothetical protein GB:AAB61516 from F21J9;supported by full-length cDNA: Ceres:27548.                      | 264869_at | -0.6 |
| putative nuclear transport factor similar to nuclear transport factor 2 (NTF2) from [Oryza sativa], GB:BAA81910; similar to ESTs gb T21347,  | 264446_at | -0.6 |
| nuclear ribonucleoprotein, putative similar to nuclear ribonucleoprotein GI:32353 from [Homo sapiens]                                        | 264418_at | -0.6 |
| pEARLI 1-like protein may be induced when levels of Aluminum become toxic or other stresses become present in the plant;supported by fu      | 264371_at | -0.6 |
| hypothetical protein contains similarity to glutamic acid/alanine-rich protein GI:6707830 from [Trypanosoma congolense]                      | 264307_at | -0.6 |
| Expressed protein ; supported by full-length cDNA: Ceres: 13607.                                                                             | 264304_at | -0.6 |
| hypothetical protein predicted by genemark.hmm                                                                                               | 264239_at | -0.6 |
| protein kinase, putative Simisimilar to protein kinase 2 GI:7573598 from [Populus nigra]                                                     | 264240_at | -0.6 |
| putative 40S ribosomal protein S18 Match to ribosomal S18 gene mRNA gb Z28701, DNA gb Z23165 from A. thaliana. ESTs gb T21121, gi            | 264203_at | -0.6 |
| putative nitrilase-associated protein Alternative splicing exists based on EST evidence                                                      | 264028_at | -0.6 |
| hypothetical protein predicted by genefinder;supported by full-length cDNA: Ceres:26961.                                                     | 263999_at | -0.6 |
| 60S ribosomal protein L11B                                                                                                                   | 263973_at | -0.6 |
| hypothetical protein predicted by genscan;supported by full-length cDNA: Ceres:113423.                                                       | 263984_at | -0.6 |
| unknown protein                                                                                                                              | 263750_at | -0.6 |
| unknown protein ; supported by cDNA: gi_13265530_gb_AF324701.2_AF324701                                                                      | 263760_at | -0.6 |
| nucleic acid-binding protein, putative similar to nucleic acid-binding protein GI:168525 from [Zea mays];supported by full-length cDNA: Cere | 263736_at | -0.6 |
| ribonuclease, RNS3 identical to ribonuclease SP:P42815, GI:562000 from [Arabidopsis thaliana];supported by full-length cDNA: Ceres:962:      | 263689_at | -0.6 |
| unknown protein ;supported by full-length cDNA: Ceres:14886.                                                                                 | 263710_at | -0.6 |
| unknown protein ; supported by full-length cDNA: Ceres: 97914.                                                                               | 263541_at | -0.6 |
| unknown protein ;supported by full-length cDNA: Ceres:74.                                                                                    | 263396_at | -0.6 |
| putative C2H2-type zinc finger protein likely a nucleic acid binding protein                                                                 | 263411_at | -0.6 |
| unknown protein ; supported by full-length cDNA: Ceres: 552.                                                                                 | 263420_at | -0.6 |
| unknown protein ;supported by full-length cDNA: Ceres:39169.                                                                                 | 263371_at | -0.6 |
| delta 9 desaturase ALMOST identical (4 aa diff t) to GP:2970036;supported by full-length cDNA: Ceres:21841.                                  | 263249_at | -0.6 |
| myrosinase-associated protein, putative similar to myrosinase-associated protein GI:1769967 from [Brassica napus]; supported by cDNA: g      | 263161_at | -0.6 |
| hypothetical protein predicted by genemark.hmm                                                                                               | 263024_at | -0.6 |
| ER lumen protein retaining receptor, putative similar to ER LUMEN PROTEIN RETAINING RECEPTOR GB:O44017 GI:6685402 from [Ent                  | 262966_at | -0.6 |

|                                                                                                                                               |             |      |
|-----------------------------------------------------------------------------------------------------------------------------------------------|-------------|------|
| unknown protein ;supported by full-length cDNA: Ceres:15169.                                                                                  | 262876_at   | -0.6 |
| putative auxin-induced protein similar to gb D14414 Indole-3-acetic acid induced protein from Vigna radiata. ESTs gb AA712892 and gb Z17      | 262703_at   | -0.6 |
| oxidoreductase, putative contains Pfam profile: PF00671 Iron/Ascorbate oxidoreductase family                                                  | 262616_at   | -0.6 |
| 23 kDa polypeptide of oxygen-evolving complex (OEC) identical to 23 kDa polypeptide of oxygen-evolving complex (OEC) GB:CAA66785 GI:1         | 262632_at   | -0.6 |
| putative 20S proteasome beta subunit PBC2 almost identical to GB:AAC32069 from [Arabidopsis thaliana], EST gb T76747 comes from thi           | 262497_at   | -0.6 |
| Expressed protein ; supported by full-length cDNA: Ceres: 10252.                                                                              | 262338_at   | -0.6 |
| hypothetical protein predicted by genemark.hmm;supported by full-length cDNA: Ceres:40196.                                                    | 262284_at   | -0.6 |
| putative GDP-mannose pyrophosphorylase similar to GDP-mannose pyrophosphorylase A GB:AAD38517 (Homo sapiens); supported by cE                 | 262174_at   | -0.6 |
| allergen, putative similar to allergen (Ole e 1) GI:2465129 from [Olea europaea];supported by full-length cDNA: Ceres:22488.                  | 262195_at   | -0.6 |
| unknown protein ;supported by full-length cDNA: Ceres:35603.                                                                                  | 262057_at   | -0.6 |
| unknown protein ;supported by full-length cDNA: Ceres:113571.                                                                                 | 261822_at   | -0.6 |
| ribosomal protein identical to GB:CAB81600 from [Arabidopsis thaliana];supported by full-length cDNA: Ceres:1097.                             | 261362_s_at | -0.6 |
| AP2 domain containing protein, putative similar to AP2 domain containing protein RAP2.5 GI:2281635 from (Arabidopsis thaliana); support       | 261315_at   | -0.6 |
| unknown protein ; supported by cDNA: gi_15292702_gb_AY050785.1_                                                                               | 261293_at   | -0.6 |
| unknown protein ;supported by full-length cDNA: Ceres:207684.                                                                                 | 261201_at   | -0.6 |
| unknown protein contains Pfam profile: PF02190 ATP-dependent protease La (LON) domain                                                         | 261141_at   | -0.6 |
| peroxisomal targeting signal type 2 receptor almost identical to peroxisomal targeting signal type 2 receptor GB:AAD27848 GI:4689316 from     | 260844_at   | -0.6 |
| UDP-glucose glucosyltransferase, putative similar to UDP-glucose glucosyltransferase GI:3928543 from [Arabidopsis thaliana]                   | 260799_at   | -0.6 |
| 14-3-3 protein GF14omega (grf2) identical to GF14omega isoform GI:487791 from [Arabidopsis thaliana];supported by full-length cDNA: Ce        | 260775_at   | -0.6 |
| chaperonin CPN10 identical to SP:P34893 from [Arabidopsis thaliana];supported by full-length cDNA: Ceres:26943.                               | 260714_at   | -0.6 |
| unknown protein ;supported by full-length cDNA: Ceres:143451.                                                                                 | 260724_at   | -0.6 |
| unknown protein ;supported by full-length cDNA: Ceres:123140.                                                                                 | 260666_at   | -0.6 |
| putative ADP-ribosylation factor 1 nearly identical to ADP-ribosylation factor 1 GB:P36397 [Arabidopsis thaliana];supported by full-length cD | 260305_at   | -0.6 |
| hypothetical protein similar to YGL010w-like protein GB:AAC32136 [Picea mariana]                                                              | 260211_at   | -0.6 |
| hypothetical protein predicted by genefinder                                                                                                  | 260205_at   | -0.6 |
| gibberellin regulatory protein, putative similar to GB:CAA75492 from [Arabidopsis thaliana]; supported by cDNA: gi_15777856_gb_AY0487         | 260141_at   | -0.6 |
| putative transcription factor BTF3 (RNA polymerase B transcription factor 3) similar to transcription factor BTF3 (RNA polymerase B transcr   | 260095_at   | -0.6 |
| putative calmodulin similar to calmodulin GB:P02596 [Renilla reniformis]; contains Pfam profile: PF00036 EF hand (4 copies);supported by f    | 260076_at   | -0.6 |
| hypothetical protein predicted by genefinder;supported by full-length cDNA: Ceres:28316.                                                      | 260078_at   | -0.6 |
| plasma membrane associated protein, putative similar to GI:6851373 from [Hordeum vulgare]                                                     | 259774_at   | -0.6 |
| Expressed protein ; supported by full-length cDNA: Ceres: 14943.                                                                              | 259661_at   | -0.6 |
| bZIP transcription factor, putative contains Pfam profile: PF00170: bZIP transcription factor; supported by cDNA: gi_15028322_gb_AY0459       | 259626_at   | -0.6 |
| hypothetical protein                                                                                                                          | 259583_at   | -0.6 |
| hypothetical protein                                                                                                                          | 259530_at   | -0.6 |
| unknown protein                                                                                                                               | 259497_at   | -0.6 |
| protein phosphatase type 2C, putative similar to protein phosphatase type 2C GI:4336436 from [Lotus japonicus]                                | 259506_at   | -0.6 |
| putative thymidine kinase similar to thymidine kinase GB:AAC31168 [Oryza sativa]; supported by full-length cDNA: Ceres: 19188.                | 259224_at   | -0.6 |
| Expressed protein ; supported by full-length cDNA: Ceres: 20097.                                                                              | 259214_at   | -0.6 |
| putative ribosomal protein S2 similar to putative ribosomal protein S2 GB:CAA74226 [Mitochondrion Triticum aestivum];supported by full-len    | 259196_at   | -0.6 |
| calmodulin-like protein similar to calmodulin GB:AAA34015 [Glycine max], Pfam HMM hit: EF hand                                                | 259143_at   | -0.6 |
| unknown protein similar to putative protein GB:CAB40986 [Arabidopsis thaliana];supported by full-length cDNA: Ceres:5170.                     | 259093_at   | -0.6 |
| DNA-damage-repair/tolerant protein DRT102 identical to DNA-damage-tolerant protein DRT102 GB:Q05212 [Arabidopsis thaliana]; supp              | 259100_at   | -0.6 |
| unknown protein similar to unknown protein GB:AAD21471 [Arabidopsis thaliana]; supported by cDNA: gi_15810316_gb_AY056197.1_                  | 259072_at   | -0.6 |
| unknown protein ; supported by cDNA: gi_13877548_gb_AF370475.1_AF370475                                                                       | 259023_at   | -0.6 |
| vacuolar membrane ATPase subunit G (AVMA10) identical to vacuolar membrane ATPase subunit G (AVMA10) GB:AF181688 [Arabidopsis                 | 258958_at   | -0.6 |
| hypothetical protein predicted by genefinder, Pfam HMM hit: RNA recognition motif. (aka RRM, RBD, or RNP domain), zinc finger: CCHC c         | 258943_at   | -0.6 |
| putative 40S ribosomal protein S17 similar to 40S ribosomal protein S17 GB:AAD50774 [Lycopersicon esculentum];supported by full-length        | 258922_at   | -0.6 |
| unknown protein ; supported by full-length cDNA: Ceres: 35785.                                                                                | 258846_at   | -0.6 |
| putative 60S ribosomal protein L35 similar to 60S ribosomal protein L35 GB:AAC27830;supported by full-length cDNA: Ceres:23470.               | 258709_at   | -0.6 |
| B regulatory subunit of PP2A (AtB beta) identical to B regulatory subunit of PP2A (AtB beta) GB:U73527 [Arabidopsis thaliana] (Eur. J. Bic    | 258659_at   | -0.6 |
| ribosomal protein L17, putative similar to ribosomal protein L17 GB:AAA34113.1 from [Nicotiana tabacum]; supported by full-length cDNA: t     | 258569_at   | -0.6 |
| hypothetical protein predicted by genemark.hmm                                                                                                | 258247_at   | -0.6 |
| unknown protein ; supported by full-length cDNA: Ceres: 11852.                                                                                | 258194_at   | -0.6 |

|                                                                                                                                                       |             |      |
|-------------------------------------------------------------------------------------------------------------------------------------------------------|-------------|------|
| Expressed protein ; supported by cDNA: gi_14334997_gb_AY037178.1_                                                                                     | 257860_at   | -0.6 |
| 60S ribosomal protein, putative similar to 60S RIBOSOMAL PROTEIN L30 GB:O49884 from [Lupinus luteus];supported by full-length cDNA/                   | 257753_at   | -0.6 |
| hypothetical protein predicted by genemark.hmm                                                                                                        | 257724_at   | -0.6 |
| unknown protein contains Pfam profiles: PF00560 leucine rich repeat, PF00069 eukaryotic protein kinase domain                                         | 257297_at   | -0.6 |
| 60S ribosomal protein L34, putative similar to 60S ribosomal protein L34 GB:P41098 [Nicotiana tabacum]; supported by cDNA: gi_1502792                 | 257141_at   | -0.6 |
| ER lumen retaining receptor (HDEL receptor), putative similar to GB:P35402 from [Arabidopsis thaliana];supported by full-length cDNA: Cei             | 257104_at   | -0.6 |
| hypothetical protein similar to unknown protein GB:AAC63835 from [Arabidopsis thaliana]                                                               | 256942_at   | -0.6 |
| unknown protein contains Pfam profile: PF00097 Zinc finger, C3HC4 type (RING finger)                                                                  | 256917_at   | -0.6 |
| photosystem I subunit X precursor identical to photosystem I subunit X precursor [Arabidopsis thaliana] GI:5738540;supported by full-length           | 256309_at   | -0.6 |
| unknown protein ; supported by cDNA: gi_15982827_gb_AY057521.1_                                                                                       | 256270_at   | -0.6 |
| predicted protein                                                                                                                                     | 256090_at   | -0.6 |
| leucine zipper protein, putative similar to leucine zipper protein GI:10177020 from [Arabidopsis thaliana]                                            | 256050_at   | -0.6 |
| hypothetical protein contains similarity to photoperiod sensitivity quantitative trait locus (Hd1) GI:11094203 from [Oryza sativa];supported by       | 256060_at   | -0.6 |
| hypothetical protein contains similarity to photosystem II 22 kDa protein GI:6006279 from [Arabidopsis thaliana];supported by full-length cDN         | 255982_at   | -0.6 |
| Expressed protein ; supported by cDNA: gi_15010591_gb_AY045597.1_                                                                                     | 255793_at   | -0.6 |
| putative protein predicted protein, Arabidopsis thaliana; supported by full-length cDNA: Ceres: 1489.                                                 | 255809_at   | -0.6 |
| hypothetical protein ; supported by full-length cDNA: Ceres: 28203.                                                                                   | 255810_at   | -0.6 |
| putative ribosomal protein S13 similar to ribosomal protein S13 (Pfam);supported by full-length cDNA: Ceres:4058.                                     | 255706_at   | -0.6 |
| SAR1/GTP-binding secretory factor ;supported by full-length cDNA: Ceres:94610.                                                                        | 255505_at   | -0.6 |
| predicted NADH dehydrogenase 24 kD subunit similar to N. crassa NADH-ubiquinone dehydrogenase 24 kD subunit precursor, GenBank a                      | 255442_at   | -0.6 |
| putative photosystem I reaction center subunit II precursor similar to spinach PSI-D, GenBank accession number P12353;supported by full-              | 255457_at   | -0.6 |
| putative protein hypothetical protein srr1391 - Synecocystis sp. (strain PCC 6803),PIR2:S75571; supported by cDNA: gi_14190426_gb_A                   | 255131_at   | -0.6 |
| RING-H2 finger protein RHA1a -like protein ;supported by full-length cDNA: Ceres:21591.                                                               | 254922_at   | -0.6 |
| hypothetical protein                                                                                                                                  | 254755_at   | -0.6 |
| shaggy-like protein kinase etha (EC 2.7.1.-) ;supported by full-length cDNA: Ceres:256076.                                                            | 254616_at   | -0.6 |
| putative snRNP protein small nuclear ribonucleoprotein B , human, PIR2:S09377;supported by full-length cDNA: Ceres:36005.                             | 254475_at   | -0.6 |
| putative DNA-binding protein DNA-binding protein WRKY3 - Petroselinum crispum,PIR2:S72445;supported by full-length cDNA: Ceres:112                    | 254159_at   | -0.6 |
| tryptophan synthase beta-subunit (TSB2) ;supported by full-length cDNA: Ceres:104687.                                                                 | 253898_s_at | -0.6 |
| putative RING zinc finger protein Arabidopsis thaliana RMA1 mRNA, PID:d1029538                                                                        | 253865_at   | -0.6 |
| Expressed protein ; supported by full-length cDNA: Ceres: 42507.                                                                                      | 253830_at   | -0.6 |
| putative zinc finger protein zinc finger protein SINA1p - Vitis vinifera,PID:e1423803                                                                 | 253838_at   | -0.6 |
| putative protein Arabidopsis thaliana RMA1 mRNA, PID:d1029538                                                                                         | 253806_at   | -0.6 |
| phytochrome-associated protein PAP2 ; supported by cDNA: gi_12083213_gb_AF332402.1_AF332402                                                           | 253749_at   | -0.6 |
| putative protein hypothetical protein - Arabidopsis thaliana,PIR2:T04873                                                                              | 253530_at   | -0.6 |
| ribosomal protein S6 - like ribosomal protein S6, Arabidopsis thaliana, PID:g2662469; supported by cDNA: gi_15292738_gb_AY050803.1_                   | 253487_at   | -0.6 |
| putative protein auxin-induced protein, Helianthus annuus, gb:AF030301; supported by cDNA: gi_15215697_gb_AY050377.1_                                 | 253307_at   | -0.6 |
| putative protein AT.I.24-7, Arabidopsis thaliana, gb:U63815                                                                                           | 253215_at   | -0.6 |
| putative protein predicted protein, Arabidopsis thaliana;supported by full-length cDNA: Ceres:1368.                                                   | 253183_at   | -0.6 |
| Expressed protein ; supported by full-length cDNA: Ceres: 1095.                                                                                       | 253117_at   | -0.6 |
| Expressed protein ; supported by full-length cDNA: Ceres: 39781.                                                                                      | 252979_at   | -0.6 |
| putative pectinesterase pectinesterase - Lycopersicon esculentum, PID:e312172                                                                         | 252989_at   | -0.6 |
| putative protein other predicted proteins Arabidopsis thaliana;supported by full-length cDNA: Ceres:123929.; supported by cDNA: gi_15810: 252975_s_at | 252975_s_at | -0.6 |
| AtRer1A ; supported by full-length cDNA: Ceres: 21466.                                                                                                | 252913_at   | -0.6 |
| putative protein                                                                                                                                      | 252866_at   | -0.6 |
| putative protein                                                                                                                                      | 252676_at   | -0.6 |
| 40S ribosomal protein 40S ribosomal proteinS20, Arabidopsis thaliana, pir:T12992                                                                      | 252601_s_at | -0.6 |
| histone H2B -like protein histone H2B1, upland cotton, PIR:T09722;supported by full-length cDNA: Ceres:10517.                                         | 252560_at   | -0.6 |
| E2, ubiquitin-conjugating enzyme 13 (UBC13) identical to gi:992706; supported by cDNA: gi_15215679_gb_AY050368.1_                                     | 252528_at   | -0.6 |
| RNA-binding protein-like protein various RNA-binding proteins;supported by full-length cDNA: Ceres:9763.                                              | 252464_at   | -0.6 |
| MTN3-like protein MtN3 gene product - Medicago truncatula,PID:e1169583; supported by cDNA: gi_13605687_gb_AF361825.1_AF361825                         | 252327_at   | -0.6 |
| signal recognition particle subunit 9 - like signal recognition particle subunit 9, Zea mays, EMBL:Y10117;supported by full-length cDNA: Cei          | 252295_at   | -0.6 |
| putative protein hypothetical protein T19L18.12 - Arabidopsis thaliana, PIR:T02616;supported by full-length cDNA: Ceres:32231.                        | 252125_at   | -0.6 |
| ubiquitin extension protein (UBQ1) identical to GI:166929, GI:166930;supported by full-length cDNA: Ceres:18586.                                      | 252056_at   | -0.6 |

|                                                                                                                                                           |             |      |
|-----------------------------------------------------------------------------------------------------------------------------------------------------------|-------------|------|
| hypothetical protein YIP1 protein, <i>Saccharomyces cerevisiae</i> , PIR:S64486                                                                           | 252002_at   | -0.6 |
| chlorophyll a/b-binding protein ; supported by cDNA: gi_13265500_gb_AF324692.2_AF324692                                                                   | 251814_at   | -0.6 |
| ribosomal protein L35-like various ribosomal L35 proteins                                                                                                 | 251834_at   | -0.6 |
| putative protein hypothetical protein F22K20.16 - <i>Arabidopsis thaliana</i> , EMBL:AC002291                                                             | 251701_at   | -0.6 |
| Expressed protein ; supported by full-length cDNA: Ceres:255818.                                                                                          | 251660_at   | -0.6 |
| ribosomal protein L11-like ribosomal protein L11, cytosolic, <i>Arabidopsis thaliana</i> , PIR:S49033;supported by full-length cDNA: Ceres:14042          | 251552_at   | -0.6 |
| Expressed protein ; supported by full-length cDNA: Ceres:42545.                                                                                           | 251409_at   | -0.6 |
| homeobox-leucine zipper protein HAT3 ; supported by cDNA: gi_527632_gb_U09338.1_ATU09338                                                                  | 251374_at   | -0.6 |
| putative protein hypothetical protein T17J13.170 - <i>Arabidopsis thaliana</i> , PIR:T48013                                                               | 251355_at   | -0.6 |
| putative protein hypothetical protein F4118.26 - <i>Arabidopsis thaliana</i> , PIR:T02471;supported by full-length cDNA: Ceres:30454.                     | 251336_at   | -0.6 |
| CP12 protein precursor-like protein CP12 protein precursor, chloroplast - <i>Pisum sativum</i> ,PIR:T06562;supported by full-length cDNA: Ceres:          | 251218_at   | -0.6 |
| putative protein S1R protein - <i>Homo sapiens</i> , EMBL:AF113127                                                                                        | 251163_at   | -0.6 |
| ATMRK1 ;supported by full-length cDNA: Ceres:253505.                                                                                                      | 251170_at   | -0.6 |
| putative protein latex allergen Hev b 7 - <i>Hevea brasiliensis</i> , EMBL:AF113546; supported by cDNA: gi_15912226_gb_AY056391.1_                        | 251174_at   | -0.6 |
| putative chloroplast inner envelope protein membrane protein, 37K, precursor, chloroplast inner envelope, common tobacco, PIR:T03230;s                    | 251118_at   | -0.6 |
| chloroplast ribosomal L1-like protein ribosomal protein L1, <i>S.oleracea</i> , EMBL:SORPL1; supported by cDNA: gi_15450736_gb_AY053410.                  | 251120_at   | -0.6 |
| putative protein MED7, <i>Homo sapiens</i> , EMBL:AF031383;supported by full-length cDNA: Ceres:95433.                                                    | 250932_s_at | -0.6 |
| putative protein similar to unknown protein (emb)CAB81585.1);supported by full-length cDNA: Ceres:18108.                                                  | 250762_at   | -0.6 |
| putative protein similar to unknown protein (emb)CAB88360.1);supported by full-length cDNA: Ceres:29476.                                                  | 250764_at   | -0.6 |
| putative protein similar to unknown protein (sp)P73920)                                                                                                   | 250727_at   | -0.6 |
| unknown protein ;supported by full-length cDNA: Ceres:262293.                                                                                             | 250665_at   | -0.6 |
| copine-like protein copine VII protein - <i>Homo sapiens</i> , EMBL:AJ133798; supported by cDNA: gi_14488103_gb_AF389301.1_AF389301                       | 250581_at   | -0.6 |
| putative protein similar to unknown protein (emb)CAB61744.1); supported by full-length cDNA: Ceres:12613.                                                 | 250511_at   | -0.6 |
| enhancer of rudimentary ; supported by cDNA: gi_1595811_gb_U67398.1_ATU67398                                                                              | 250406_at   | -0.6 |
| putative potassium transport protein glutathione-regulated potassium-efflux system protein KEFB, <i>Escherichia coli</i> , SWISSPROT:P45522               | 250329_at   | -0.6 |
| putative protein predicted proteins, <i>Schizosaccharomyces pombe</i>                                                                                     | 250281_at   | -0.6 |
| putative protein ;supported by full-length cDNA: Ceres:5392.                                                                                              | 250289_at   | -0.6 |
| putative protein polypeptide deformylase, <i>Aquifex aeolicus</i> , PIR:C70352;supported by full-length cDNA: Ceres:150612.                               | 250146_at   | -0.6 |
| putative protein similar to unknown protein (dbj)BAA90342.1);supported by full-length cDNA: Ceres:1816.                                                   | 250027_at   | -0.6 |
| beta-amylase-like proten beta-amylase - <i>Prunus armeniaca</i> , EMBL:AF139501;supported by full-length cDNA: Ceres:30798.                               | 250007_at   | -0.6 |
| putative protein similar to unknown protein (gb)AAF02129.1);supported by full-length cDNA: Ceres:35419.                                                   | 249941_at   | -0.6 |
| putative protein contains similarity to thymidine kinase;supported by full-length cDNA: Ceres:118777.                                                     | 249874_at   | -0.6 |
| 6-phosphogluconolactonase-like protein ;supported by full-length cDNA: Ceres:21890.                                                                       | 249733_at   | -0.6 |
| putative protein similar to unknown protein (emb CAB62461.1);supported by full-length cDNA: Ceres:268701.                                                 | 249752_at   | -0.6 |
| putative protein predicted proteins, <i>Arabidopsis thaliana</i> ; supported by cDNA: gi_15810334_gb_AY056206.1_                                          | 249580_at   | -0.6 |
| 14-3-3 protein GF14psi (grf3/RC11) identical to 14-3-3 protein GF14 psi GI:1168200, SP:P42644; supported by cDNA: gi_166716_gb_L091                       | 249514_at   | -0.6 |
| putative protein MtN24 gene, <i>Medicago truncatula</i> , EMBL:MTY15290                                                                                   | 249400_at   | -0.6 |
| protein kinase - like protein protein kinase ATN1, <i>Arabidopsis thaliana</i> , PIR:S61766                                                               | 249361_at   | -0.6 |
| prohibitin (gb AAC49691.1);supported by full-length cDNA: Ceres:37298.                                                                                    | 249344_at   | -0.6 |
| putative protein similar to unknown protein (gb)AAF24581.1)                                                                                               | 249258_at   | -0.6 |
| N-hydroxycinnamoyl benzoyltransferase-like protein                                                                                                        | 249188_at   | -0.6 |
| unknown protein ;supported by full-length cDNA: Ceres:32890.                                                                                              | 249190_at   | -0.6 |
| putative protein similar to unknown protein (gb)AAF69166.1); supported by cDNA: gi_15451133_gb_AY054647.1_                                                | 249182_at   | -0.6 |
| DNA binding protein EREBP-3-like protein                                                                                                                  | 249087_at   | -0.6 |
| cytochrome P450                                                                                                                                           | 248964_at   | -0.6 |
| NADH dehydrogenase 10.5K chain-like protein ; supported by full-length cDNA: Ceres:39633.                                                                 | 248746_at   | -0.6 |
| indole-3-glycerol phosphate synthase ; supported by cDNA: gi_15215597_gb_AY050327.1_                                                                      | 248688_at   | -0.6 |
| U6 snRNA-associated Sm-like protein-like                                                                                                                  | 248678_at   | -0.6 |
| NaCl-inducible Ca2+-binding protein-like; calmodulin-like ; supported by cDNA: gi_13358217_gb_AF325028.2_AF325028                                         | 248607_at   | -0.6 |
| FRO2-like protein; NADPH oxidase-like                                                                                                                     | 248566_s_at | -0.6 |
| transport inhibitor response 1 (TIR1), putative similar to F-box containing protein TIR1 GI:13249030 from [ <i>Populus tremula</i> x <i>Populus tremu</i> | 248557_at   | -0.6 |
| nodulin-like protein ; supported by cDNA: gi_14532599_gb_AY039924.1_                                                                                      | 248521_s_at | -0.6 |
| unknown protein ; supported by full-length cDNA: Ceres:21548.                                                                                             | 248376_at   | -0.6 |



|                                                                                                                                                                      |             |      |
|----------------------------------------------------------------------------------------------------------------------------------------------------------------------|-------------|------|
| fructokinase 1 ; supported by cDNA: gi_13878052_gb_AF370289.1_AF370289                                                                                               | 248381_at   | -0.6 |
| unknown protein                                                                                                                                                      | 248341_at   | -0.6 |
| GTP-binding protein-like ;supported by full-length cDNA: Ceres:16621.                                                                                                | 248346_at   | -0.6 |
| putative protein contains similarity to RNA-binding protein; supported by full-length cDNA: Ceres: 14044.                                                            | 248173_at   | -0.6 |
| putative protein similar to unknown protein (gb AAD50013.1)                                                                                                          | 248140_at   | -0.6 |
| small Ras-like GTP-binding protein (gb AAB58478.1) ; supported by cDNA: gi_14596016_gb_AY042796.1_                                                                   | 248107_at   | -0.6 |
| putative protein similar to unknown protein (pir T07080)                                                                                                             | 248058_at   | -0.6 |
| putative protein contains similarity to unknown protein (pir  T08924);supported by full-length cDNA: Ceres:141890.                                                   | 248040_at   | -0.6 |
| unknown protein ;supported by full-length cDNA: Ceres:33108.                                                                                                         | 248041_at   | -0.6 |
| calcineurin B-like protein 2 (gb AAC26009.1) ;supported by full-length cDNA: Ceres:37280.                                                                            | 248001_at   | -0.6 |
| Expressed protein ; supported by full-length cDNA: Ceres: 17375.                                                                                                     | 247817_at   | -0.6 |
| cytochrome c oxidase subunit - like cytochrome c oxidase subunit 5c, <i>Oryza sativa</i> , EMBL:AB027123;supported by full-length cDNA: Ceres                        | 247520_at   | -0.6 |
| E2, ubiquitin-conjugating enzyme 3 (UBC3) identical to gi:431261, SP:P42746;supported by full-length cDNA: Ceres:148141.                                             | 247433_at   | -0.6 |
| putative protein predicted proteins, <i>Oryza sativa</i> , <i>Arabidopsis thaliana</i> and yeast                                                                     | 247396_at   | -0.6 |
| putative protein contains similarity to acetyltransferase; supported by full-length cDNA: Ceres: 31971.                                                              | 247330_at   | -0.6 |
| putative protein similar to unknown protein (emb CAB89373.1); supported by cDNA: gi_14334413_gb_AY034898.1_                                                          | 247285_at   | -0.6 |
| putative protein similar to unknown protein (emb CAB16809.1); supported by full-length cDNA: Ceres: 118150.                                                          | 247150_at   | -0.6 |
| WD repeat protein-like ;supported by full-length cDNA: Ceres:11277.                                                                                                  | 247106_at   | -0.6 |
| 33 kDa polypeptide of oxygen-evolving complex (OEC) in photosystem II (emb CAA75629.1) ;supported by full-length cDNA: Ceres:37218.                                  | 247073_at   | -0.6 |
| leucine-rich repeats containing protein grr1 - <i>Glycine max</i> . EMBL:AF019910                                                                                    | 246935_at   | -0.6 |
| putative protein various predicted proteins, <i>Arabidopsis thaliana</i> ;supported by full-length cDNA: Ceres:28528.                                                | 246860_at   | -0.6 |
| drought-induced protein - like non-consensus AT donor splice site at exon 3, AC acceptor splice site at exon 4, drought-induced protein Di1                          | 246824_at   | -0.6 |
| putative protein seven transmembrane domain orphan receptor, <i>Mus musculus</i> , EMBL:AF051098;supported by full-length cDNA: Ceres:96i                            | 246793_at   | -0.6 |
| ADP-ribosylation factor -like protein ADP-ribosylation factor, <i>Dugesia japonica</i> , EMBL:DJAB1051;supported by full-length cDNA: Ceres:268                      | 246422_at   | -0.6 |
| glucose 6 phosphate/phosphate translocator-like protein glucose 6 phosphate/phosphate translocator - <i>Arabidopsis thaliana</i> , EMBL:AF233f                       | 246445_at   | -0.6 |
| Ca <sup>2+</sup> /H <sup>+</sup> -exchanging protein-like <i>Arabidopsis thaliana</i> high affinity calcium antiporter CAX1 encoded by GenBank Accession Number U574 | 246302_at   | -0.6 |
| E2, ubiquitin-conjugating enzyme 17 (UBC17) identical to gi:2801446; supported by full-length cDNA: Ceres:40968.                                                     | 246195_at   | -0.6 |
| ribosomal protein L36-like ribosomal protein L36 - <i>Synechocystis sp.</i> , PIR:S77481;supported by full-length cDNA: Ceres:28109.                                 | 246073_at   | -0.6 |
| glutaredoxin ;supported by full-length cDNA: Ceres:115597.                                                                                                           | 246092_at   | -0.6 |
| Expressed protein ; supported by full-length cDNA: Ceres: 31366.                                                                                                     | 246007_at   | -0.6 |
| elongation factor 1B alpha-subunit ;supported by full-length cDNA: Ceres:26936.                                                                                      | 245949_at   | -0.6 |
| predicted protein                                                                                                                                                    | 245913_at   | -0.6 |
| putative protein ; supported by full-length cDNA: Ceres: 8242.                                                                                                       | 245894_at   | -0.6 |
| hypothetical protein similar to hypothetical protein GB:AAD18105 GI:4337191 from [ <i>Arabidopsis thaliana</i> ]                                                     | 245784_at   | -0.6 |
| rec - like protein                                                                                                                                                   | 245695_at   | -0.6 |
| carnitine racemase like protein                                                                                                                                      | 245612_at   | -0.6 |
| cytochrome c oxidoreductase like protein                                                                                                                             | 245524_at   | -0.6 |
| cyanohydrin lyase like protein ;supported by full-length cDNA: Ceres:5546.                                                                                           | 245349_at   | -0.6 |
| 60S ribosomal protein L15 homolog ;supported by full-length cDNA: Ceres:31538.                                                                                       | 245355_at   | -0.6 |
| putative protein ;supported by full-length cDNA: Ceres:2161.                                                                                                         | 245357_at   | -0.6 |
| hypothetical protein ;supported by full-length cDNA: Ceres:42815.                                                                                                    | 245361_at   | -0.6 |
| ribosomal protein ; supported by full-length cDNA: Ceres: 18153.                                                                                                     | 245311_at   | -0.6 |
| DNA-binding homeotic protein Athb-2 ; supported by cDNA: gi_166751_gb_M90394.1_ATHHOMEOA                                                                             | 245276_at   | -0.6 |
| ATP-sulfurylase ; supported by cDNA: gi_459143_gb_U06275.1_ATU06275                                                                                                  | 245254_at   | -0.6 |
| putative poly(A) binding protein ; supported by cDNA: gi_15292850_gb_AY050859.1_                                                                                     | 245085_at   | -0.6 |
| unknown protein Alternative splice forms exist.;supported by full-length cDNA: Ceres:9368.                                                                           | 245044_at   | -0.6 |
| hypothetical protein                                                                                                                                                 | 244993_s_at | -0.6 |
| hypothetical protein predicted by genefinder                                                                                                                         | 257398_at   | -0.6 |
| unknown protein                                                                                                                                                      | 257495_at   | -0.6 |
| hypothetical protein                                                                                                                                                 | 257583_at   | -0.6 |
| hypothetical protein predicted by genemark.hmm                                                                                                                       | 261509_at   | -0.6 |
| unknown protein ; supported by cDNA: gi_16648938_gb_AY059839.1_                                                                                                      | 261320_at   | -0.6 |
| putative RAS-related GTP-binding protein similar to RAS-related GTP-binding protein GB:AAD22451.1 from [ <i>Gossypium hirsutum</i> ];supporte                        | 258314_at   | -0.6 |

|                                                                                                                                              |             |      |
|----------------------------------------------------------------------------------------------------------------------------------------------|-------------|------|
| Expressed protein ; supported by full-length cDNA: Ceres: 7103.                                                                              | 258105_at   | -0.6 |
| Histone deacetylase ; supported by cDNA: gi_11066138_gb_AF195547.1_AF195547                                                                  | 252982_at   | -0.6 |
| Expressed protein ; supported by full-length cDNA: Ceres: 34967.                                                                             | 245326_at   | -0.6 |
| mitochondrial F1-ATPase, gamma subunit (ATP3_ARATH) ;supported by full-length cDNA: Ceres:26812.                                             | 267600_at   | -0.5 |
| photosystem II reaction center 6.1KD protein ;supported by full-length cDNA: Ceres:34999.                                                    | 267526_at   | -0.5 |
| putative UDP-N-acetylglucosamine pyrophosphorylase ;supported by full-length cDNA: Ceres:5509.                                               | 267432_at   | -0.5 |
| putative protein transport protein SEC13 ;supported by full-length cDNA: Ceres:36577.                                                        | 267277_at   | -0.5 |
| putative sugar nucleotide phosphorylase ; supported by cDNA: gi_12697582_dbj_AB037876.1_AB037876                                             | 267220_at   | -0.5 |
| unknown protein                                                                                                                              | 267230_at   | -0.5 |
| 60S ribosomal protein L7 ;supported by full-length cDNA: Ceres:36813.                                                                        | 267213_at   | -0.5 |
| putative DOF zinc finger protein                                                                                                             | 267171_at   | -0.5 |
| aquaporin (plasma membrane intrinsic protein 1B) identical to GB:Z17399, GB:Z17424, and GB:68293;supported by full-length cDNA: Cere         | 266927_at   | -0.5 |
| putative phosphomannomutase ;supported by full-length cDNA: Ceres:998.                                                                       | 266928_at   | -0.5 |
| unknown protein ;supported by full-length cDNA: Ceres:37655.                                                                                 | 266709_at   | -0.5 |
| defender against cell death protein identical to (but predicted longer than) GB: 2623638;supported by full-length cDNA: Ceres:3992.          | 266639_at   | -0.5 |
| hypothetical protein predicted by genefinder and genscan; supported by cDNA: gi_15724241_gb_AF412061.1_AF412061                              | 266608_at   | -0.5 |
| Expressed protein ; supported by cDNA: gi_15215834_gb_AY050447.1_                                                                            | 266583_at   | -0.5 |
| unknown protein                                                                                                                              | 266510_at   | -0.5 |
| unknown protein ;supported by full-length cDNA: Ceres:10341.                                                                                 | 266483_at   | -0.5 |
| calmodulin-like protein identical to GB:X68054;supported by full-length cDNA: Ceres:11537.                                                   | 266371_at   | -0.5 |
| putative RGA1, gibberellin response modulation protein identical to GB:Y11336, member of SCARECROW family; supported by cDNA: gi_1!          | 266331_at   | -0.5 |
| unknown protein contains non-consensus donor splice site AT at exon2 and acceptor splice site AC at exon3.                                   | 266253_at   | -0.5 |
| putative aquaporin (water channel protein) ; supported by cDNA: gi_15010777_gb_AY045690.1_                                                   | 266172_at   | -0.5 |
| putative SCARECROW gene regulator                                                                                                            | 266131_at   | -0.5 |
| enoyl-ACP reductase (enr-A)                                                                                                                  | 266035_at   | -0.5 |
| 40S ribosomal protein S5 identical to GP:3043428;supported by full-length cDNA: Ceres:8397.                                                  | 265963_s_at | -0.5 |
| unknown protein                                                                                                                              | 265847_at   | -0.5 |
| unknown protein ;supported by full-length cDNA: Ceres:38690.                                                                                 | 265771_at   | -0.5 |
| unknown protein                                                                                                                              | 265637_at   | -0.5 |
| hypothetical protein similar to hypothetical protein GB:AAD18138; supported by full-length cDNA: Ceres: 23166.                               | 265547_at   | -0.5 |
| hypothetical protein ;supported by full-length cDNA: Ceres:5.                                                                                | 265479_at   | -0.5 |
| unknown protein ;supported by full-length cDNA: Ceres:250015.                                                                                | 265458_at   | -0.5 |
| putative caltractin ;supported by full-length cDNA: Ceres:7802.                                                                              | 265460_at   | -0.5 |
| unknown protein                                                                                                                              | 265417_at   | -0.5 |
| unknown protein ; supported by full-length cDNA: Ceres: 91872.                                                                               | 265390_at   | -0.5 |
| lipoic acid synthase (LIP1) ; supported by cDNA: gi_14334939_gb_AY035143.1_                                                                  | 265392_at   | -0.5 |
| hypothetical protein predicted by genscan; supported by full-length cDNA: Ceres: 32047.                                                      | 265336_at   | -0.5 |
| hypothetical protein                                                                                                                         | 265227_s_at | -0.5 |
| unknown protein                                                                                                                              | 265203_at   | -0.5 |
| unknown protein Location of ESTs 203I24T7, gb H76794 and 203I24XP, gb AA605510;supported by full-length cDNA: Ceres:9756.                    | 265039_at   | -0.5 |
| Expressed protein ; supported by cDNA: gi_14596174_gb_AY042875.1_                                                                            | 265043_at   | -0.5 |
| putative JUN kinase activator protein similar to JUN activation domain binding proteins GB:AAC36344, GB:AAC36343, and GB:AAC26484;           | 264724_at   | -0.5 |
| serine threonine protein phosphatase (type 2A) identical to type 2A serine threonine protein phosphatase GB:AAC49668 (Arabidopsis thalia     | 264703_at   | -0.5 |
| unknown protein ;supported by full-length cDNA: Ceres:2935.                                                                                  | 264609_at   | -0.5 |
| putative pectate lyase A11 similar to GB:CAB36835;supported by full-length cDNA: Ceres:37952.                                                | 264611_at   | -0.5 |
| photosystem I subunit V precursor, putative similar to photosystem I subunit V precursor GB:CAB52748 GI:5734520 from [Arabidopsis thali      | 264545_at   | -0.5 |
| Expressed protein ; supported by cDNA: gi_14488091_gb_AF389294.1_AF389294                                                                    | 264546_at   | -0.5 |
| germin-like protein identical to Arabidopsis germin-like protein, gi 1755178. Location of EST 180L10T7, gi 906417; supported by cDNA: gi_    | 264506_at   | -0.5 |
| hypothetical protein contains similarity to phosphate/phosphoenolpyruvate translocator precursor GI:1778141 from [Arabidopsis thaliana]      | 264419_s_at | -0.5 |
| unknown protein similar to hypothetical protein GI:4079632 from [Arabidopsis thaliana]                                                       | 264424_at   | -0.5 |
| symbiosis-related protein, putative similar to symbiosis-related protein GI:2072022 from [Laccaria bicolor];supported by full-length cDNA: C | 264285_at   | -0.5 |
| unknown protein                                                                                                                              | 264054_at   | -0.5 |
| unknown protein ;supported by full-length cDNA: Ceres:33232.                                                                                 | 263880_at   | -0.5 |

|                                                                                                                                                |             |      |
|------------------------------------------------------------------------------------------------------------------------------------------------|-------------|------|
| putative ferritin                                                                                                                              | 263831_at   | -0.5 |
| putative fructose biphosphate aldolase ; supported by cDNA: gi_14334739_gb_AY035043.1_                                                         | 263761_at   | -0.5 |
| unknown protein similar to unknown protein GB:AACT79135, ESTs gb T20423, gb AA712864, gb H76323 and gb Z25560 come from this ge                | 263704_at   | -0.5 |
| putative tyrosine aminotransferase ;supported by full-length cDNA: Ceres:14570.                                                                | 263539_at   | -0.5 |
| unknown protein ;supported by full-length cDNA: Ceres:15081.                                                                                   | 263431_at   | -0.5 |
| unknown protein ; supported by full-length cDNA: Ceres: 11283.                                                                                 | 263399_at   | -0.5 |
| predicted protein ;supported by full-length cDNA: Ceres:28779.                                                                                 | 263410_at   | -0.5 |
| putative snRNP splicing factor ;supported by full-length cDNA: Ceres:97480.                                                                    | 263332_at   | -0.5 |
| alanine-glyoxylate aminotransferase ;supported by full-length cDNA: Ceres:8306.                                                                | 263350_at   | -0.5 |
| unknown protein similar to ESTs gb H36734 and gb AA651244                                                                                      | 263256_at   | -0.5 |
| unknown protein ;supported by full-length cDNA: Ceres:3173.                                                                                    | 263129_at   | -0.5 |
| unknown protein                                                                                                                                | 263142_at   | -0.5 |
| protein translation factor Sui1 homolog, putative similar to protein translation factor Sui1 homolog GI:9758256 from [Arabidopsis thaliana]; s | 262959_at   | -0.5 |
| glutathione-s-transferase, putative similar to GST3_HUMAN SP:O14880; supported by full-length cDNA: Ceres: 8446.                               | 262932_at   | -0.5 |
| NADPH-dependent codeinone reductase, putative similar to NADPH-dependent codeinone reductase GI:6478210 from [Papaver somniferu                | 262913_at   | -0.5 |
| membrane related protein CP5, putative similar to membrane related protein CP5 GI:4741929 from [Arabidopsis thaliana]; supported by cD         | 262884_at   | -0.5 |
| unknown protein ;supported by full-length cDNA: Ceres:17521.                                                                                   | 262801_at   | -0.5 |
| putative translation initiation factor similar to gb U54559 eIF3-p40 subunit from Homo sapiens and is a member of the PF 01398 Mov34 fami      | 262790_at   | -0.5 |
| photosystem I subunit III precursor, putative similar to photosystem I subunit III precursor GB:U08135 GI:854707 from[Hordeum vulgare];su      | 262557_at   | -0.5 |
| unknown protein EST gb T41993 comes from this gene;supported by full-length cDNA: Ceres:97320.                                                 | 262499_at   | -0.5 |
| disease resistance protein, putative similar to disease resistance protein GI:9758876 from [Arabidopsis thaliana]                              | 262383_at   | -0.5 |
| putative ubiquinol-cytochrome c reductase similar to ubiquinol-cytochrome c reductase GB:P48504 from [Solanum tuberosum]; supported by         | 262206_at   | -0.5 |
| Expressed protein ; supported by full-length cDNA: Ceres: 28445.                                                                               | 262116_at   | -0.5 |
| acyl-(acyl carrier protein) thioesterase, putative almost identical to acyl-(acyl carrier protein) thioesterase GB:CAA85387 GI:634003 from [A  | 261722_at   | -0.5 |
| hypothetical protein similar to hypothetical protein GB:AACT61817 GI:3668085 from [Arabidopsis thaliana]                                       | 261700_at   | -0.5 |
| unknown protein ; supported by cDNA: gi_12083293_gb_AF332443.1_AF332443                                                                        | 261626_at   | -0.5 |
| hypoxanthine ribosyl transferase, putative similar to hypoxanthine ribosyl transferase GB:AACT46403 GI:2689037 from [Vibrio parahaemolyt       | 261516_at   | -0.5 |
| hypothetical protein predicted by genemark.hmm;supported by full-length cDNA: Ceres:36233.                                                     | 261483_at   | -0.5 |
| hypothetical protein predicted by genemark.hmm;supported by full-length cDNA: Ceres:116544.                                                    | 261454_at   | -0.5 |
| C-8,7 sterol isomerase identical to GB:AACT03489 from [Arabidopsis thaliana] (Plant Mol. Biol. 38 (5), 807-815 (1998));supported by full-len   | 261228_at   | -0.5 |
| unknown protein ; supported by cDNA: gi_15450466_gb_AY052334.1_                                                                                | 261209_at   | -0.5 |
| protease, putative similar to SP:P36774 from [Myxococcus xanthus];supported by full-length cDNA: Ceres:94409.                                  | 261118_at   | -0.5 |
| chloroplast 50S ribosomal protein L31, putative similar to SP:O46917 from [Guillardia theta];supported by full-length cDNA: Ceres:37854.       | 261119_at   | -0.5 |
| Expressed protein ; supported by full-length cDNA: Ceres: 1349.                                                                                | 261039_at   | -0.5 |
| glycine cleavage system H protein precursor, putative similar to GB:Z37524 from [Flaveria anomala];supported by full-length cDNA: Ceres:;      | 260704_at   | -0.5 |
| hypothetical protein contains similarity to CDP-diacylglycerol synthase 2 GI:3892191 from [ Homo sapiens]                                      | 260636_at   | -0.5 |
| RING-H2 zinc finger protein (ATL3) identical to RING-H2 zinc finger protein (ATL3) GB:AF132013 (Arabidopsis thaliana); supported by cDN        | 260454_at   | -0.5 |
| putative 40S ribosomal protein SA (laminin receptor-like protein) identical to laminin receptor-like protein GB:U01955 [Arabidopsis thaliana]; | 260426_at   | -0.5 |
| hypothetical protein predicted by genscan+                                                                                                     | 260277_at   | -0.5 |
| unknown protein similar to Pi starvation-induced protein GB:BAA06151 from [Nicotiana tabacum]; supported by full-length cDNA: Ceres: 37;       | 260176_at   | -0.5 |
| Expressed protein ; supported by full-length cDNA: Ceres: 8189.                                                                                | 260100_at   | -0.5 |
| 3-hydroxy-3-methylglutaryl CoA reductase (AA 1-592) identical to hydroxy methylglutaryl CoA reductase (AA 1-592) GB:X15032 (Plant Mol.         | 259983_at   | -0.5 |
| 60S ribosomal protein L37, putative similar to SP:Q43292 from [Arabidopsis thaliana]; supported by cDNA: gi_13877906_gb_AF370216.1_            | 259612_at   | -0.5 |
| hypothetical protein                                                                                                                           | 259529_at   | -0.5 |
| unknown protein ;supported by full-length cDNA: Ceres:5232.                                                                                    | 259357_at   | -0.5 |
| hypothetical protein similar to putative glycosyl transferase GI:6862930 from [Arabidopsis thaliana];supported by full-length cDNA: Ceres:11   | 259358_at   | -0.5 |
| unknown protein                                                                                                                                | 259354_at   | -0.5 |
| putative cystathionine gamma-synthase similar to cystathionine gamma-synthase GB:AAB41235 from [Arabidopsis thaliana]; supported by c          | 259279_at   | -0.5 |
| hypothetical protein predicted by genefinder; supported by full-length cDNA: Ceres: 40813.                                                     | 259171_at   | -0.5 |
| unknown protein                                                                                                                                | 259068_at   | -0.5 |
| putative adenylate kinase similar to AdK adenylate kinase GB:S50007 [Streptomyces coelicolor]                                                  | 258998_at   | -0.5 |
| unknown protein ;supported by full-length cDNA: Ceres:97.                                                                                      | 258875_at   | -0.5 |
| putative 40S ribosomal protein S23 similar to 40S ribosomal protein S23 (S12) GB:P46297 from [Fragaria x ananassa];supported by full-ler       | 258712_s_at | -0.5 |

|                                                                                                                                              |             |      |
|----------------------------------------------------------------------------------------------------------------------------------------------|-------------|------|
| putative elongation factor P (EF-P) similar to elongation factor P (EF-P) GB:Q54760 [Synechococcus PCC7942];supported by full-length cD      | 258674_at   | -0.5 |
| adenylate translocator identical to adenylate translocator GB:X65549 [Arabidopsis thaliana];supported by full-length cDNA: Ceres:36818.      | 258680_at   | -0.5 |
| thioredoxin f1 identical to thioredoxin f1 GB:AF144385 [Arabidopsis thaliana];supported by full-length cDNA: Ceres:11767.                    | 258607_at   | -0.5 |
| putative S-adenosylmethionine:2-demethylmenaquinone methyltransferase similar to S-adenosylmethionine:2-demethylmenaquinone methy            | 258614_at   | -0.5 |
| hypothetical protein similar to receptor protein kinases: GB:CAB43834, GB:S71277 [Arabidopsis thaliana]                                      | 258557_at   | -0.5 |
| unknown protein identical to unknown protein GB:AAF30301 from [Arabidopsis thaliana]; supported by cDNA: gi_16648934_gb_AY059837.            | 258472_at   | -0.5 |
| hypothetical protein predicted by genemark.hmm                                                                                               | 258442_at   | -0.5 |
| AP2 domain containing protein RAP2.3 identical to GB:AAC49769 from [Arabidopsis thaliana];supported by full-length cDNA: Ceres:35981.        | 258434_at   | -0.5 |
| receptor kinase, putative similar to receptor kinase GB:AAA33715 from [Petunia integrifolia];supported by full-length cDNA: Ceres:22221.     | 258159_at   | -0.5 |
| hypothetical protein predicted by genscan+;supported by full-length cDNA: Ceres:102455.                                                      | 258079_at   | -0.5 |
| unknown protein ; supported by cDNA: gi_15809843_gb_AY054189.1_                                                                              | 257988_at   | -0.5 |
| unknown protein contains Pfam profile: PF01758 sodium bile acid symporter family;supported by full-length cDNA: Ceres:26683.                 | 257908_at   | -0.5 |
| Expressed protein ; supported by full-length cDNA: Ceres: 40038.                                                                             | 257909_at   | -0.5 |
| Cdc45-like protein similar to Cdc45 GB:AAC67520 [Xenopus laevis] (EMBO J. 17, 5699-5707 (1998)) (required for the initiation of eukaryot     | 257813_at   | -0.5 |
| glyceraldehyde 3-phosphate dehydrogenase A subunit (GapA) identical to glyceraldehyde 3-phosphate dehydrogenase A subunit (GapA) C           | 257807_at   | -0.5 |
| unknown protein ;supported by full-length cDNA: Ceres:121435.                                                                                | 257745_at   | -0.5 |
| phosphoglycerate kinase, putative similar to phosphoglycerate kinase, chloroplast precursor GB:P29409 from [Spinacia oleracea];supporte      | 257699_at   | -0.5 |
| hypothetical protein predicted by genemark.hmm; supported by cDNA: gi_16323108_gb_AY057658.1_                                                | 257707_at   | -0.5 |
| unknown protein ;supported by full-length cDNA: Ceres:6530.                                                                                  | 257299_at   | -0.5 |
| hypothetical protein predicted by genemark.hmm, contains Pfam profile:F00575 S1:S1 RNA binding domain; supported by cDNA: gi_15146           | 257172_at   | -0.5 |
| unknown protein                                                                                                                              | 257074_at   | -0.5 |
| unknown protein contains Pfam profile:PF00279 LTP:Plant lipid transfer protein family;supported by full-length cDNA: Ceres:19287.            | 256933_at   | -0.5 |
| unknown protein contains Pfam profile:PF00011 HSP20:Hsp20/alpha crystallin family;supported by full-length cDNA: Ceres:14572.                | 256934_at   | -0.5 |
| hypothetical protein contains similarity to RNA polymerase transcriptional regulation mediator GB:AAC26869 from [Homo sapiens]               | 256812_at   | -0.5 |
| ATHP2, putative similar to ATHP2 GB:BAA37111 from [Arabidopsis thaliana];supported by full-length cDNA: Ceres:24559.                         | 256744_at   | -0.5 |
| serine/arginine-rich protein, putative similar to serine/arginine-rich protein GB:AAF17288 GI:6572475 from [Arabidopsis thaliana]; supportec | 256649_at   | -0.5 |
| hypothetical protein                                                                                                                         | 256583_at   | -0.5 |
| hypothetical protein predicted by genemark.hmm                                                                                               | 256219_at   | -0.5 |
| unknown protein ;supported by full-length cDNA: Ceres:94739.                                                                                 | 256067_at   | -0.5 |
| hypothetical protein ;supported by full-length cDNA: Ceres:7642.                                                                             | 255981_at   | -0.5 |
| plastocyanin, putative similar to plastocyanin GI:1865683 from [Arabidopsis thaliana];supported by full-length cDNA: Ceres:23406.            | 255886_at   | -0.5 |
| lemir (miraculin), putative similar to lemire (miraculin) GI:2654440 from [Lycopersicon esculentum]; supported by cDNA: gi_12083239_gb_Af    | 255904_at   | -0.5 |
| 40S ribosomal protein S26                                                                                                                    | 255819_s_at | -0.5 |
| auxin regulated protein (IAA13) GB:S58499;supported by full-length cDNA: Ceres:13741.                                                        | 255788_at   | -0.5 |
| myb factor, putative similar to myb factor GI:1946266 from [Orzya sativa]; supported by cDNA: gi_3941465_gb_AF062887.1_AF062887              | 255753_at   | -0.5 |
| unknown protein ;supported by full-length cDNA: Ceres:37302.                                                                                 | 255719_at   | -0.5 |
| coded for by A. thaliana cDNA R30513                                                                                                         | 255716_at   | -0.5 |
| hypothetical protein                                                                                                                         | 255643_at   | -0.5 |
| putative protein kinase                                                                                                                      | 255617_at   | -0.5 |
| putative L5 ribosomal protein ;supported by full-length cDNA: Ceres:22919.                                                                   | 255623_at   | -0.5 |
| putative protein ;supported by full-length cDNA: Ceres:156170.                                                                               | 255478_at   | -0.5 |
| putative M-type thioredoxin similar to A. thaliana protein F21B7.7, GenBank accession number AC002560;supported by full-length cDNA: C       | 255379_at   | -0.5 |
| putative protein various predicted proteins; supported by cDNA: gi_15809939_gb_AY054238.1_                                                   | 255221_at   | -0.5 |
| putative protein hypothetical protein - Arabidopsis thaliana.PIR:F71409;supported by full-length cDNA: Ceres:22715.                          | 255243_at   | -0.5 |
| nucleoside-diphosphate kinase ;supported by full-length cDNA: Ceres:30158.                                                                   | 255089_at   | -0.5 |
| rab7 -like protein rab7 protein -Vigna aconitifolia,PIR2:S39567; supported by cDNA: gi_15718417_dbj_AB071851.1_AB071851                      | 255052_at   | -0.5 |
| hypothetical protein                                                                                                                         | 255055_at   | -0.5 |
| S18.A ribosomal protein ;supported by full-length cDNA: Ceres:24071.                                                                         | 255000_at   | -0.5 |
| putative protein ;supported by full-length cDNA: Ceres:7769.                                                                                 | 254950_at   | -0.5 |
| DnaJ-like protein DnaJ-like protein, Phaseolus vulgaris, U77935; supported by cDNA: gi_6691126_gb_AF214107.1_AF214107                        | 254688_at   | -0.5 |
| pherophorin - like protein pherophorin-S, Volvox carteri, PIR:T10798                                                                         | 254649_at   | -0.5 |
| protein ch-42 precursor, chloroplast ;supported by full-length cDNA: Ceres:7501.                                                             | 254623_at   | -0.5 |
| ribosomal protein L11, cytosolic ;supported by full-length cDNA: Ceres:2359.                                                                 | 254617_s_at | -0.5 |

|                                                                                                                                                  |             |      |
|--------------------------------------------------------------------------------------------------------------------------------------------------|-------------|------|
| putative protein ;supported by full-length cDNA: Ceres:29133.                                                                                    | 254462_at   | -0.5 |
| hypothetical protein ; supported by cDNA: gi_15028392_gb_AY045999.1_                                                                             | 254481_at   | -0.5 |
| G10 - like protein Maternal G10 like protein, Oryza sativa, PATCHX:D1002643; supported by cDNA: gi_15294271_gb_AF410327.1_AF410                  | 254399_at   | -0.5 |
| RCc3- like protein RCc3 protein, Oryza sativa, PIR2:S53012;supported by full-length cDNA: Ceres:270276.                                          | 254327_at   | -0.5 |
| putative protein ; supported by full-length cDNA: Ceres: 6527.                                                                                   | 254228_at   | -0.5 |
| putative protein NorM, Vibrio parahaemolyticus, gb:AB010463                                                                                      | 254077_at   | -0.5 |
| putative protein Human GS1 (protein of unknown function) mRNA, PID:g183653;supported by full-length cDNA: Ceres:98650.                           | 254039_at   | -0.5 |
| putative thioredoxin thioredoxin - Lilium longiflorum, PID:g308906;supported by full-length cDNA: Ceres:148597.                                  | 253990_at   | -0.5 |
| putative protein ;supported by full-length cDNA: Ceres:113484.                                                                                   | 253891_at   | -0.5 |
| putative wound induced protein wound-induced protein - tomato (fragment), PIR2:S19773;supported by full-length cDNA: Ceres:20161.                | 253812_at   | -0.5 |
| putative beta-expansin/allergen protein soybean pollen allergen (cim1) protein - soybean, PIR2:S48032;supported by full-length cDNA: Cer         | 253815_at   | -0.5 |
| photosystem I subunit PSI-E - like protein photosystem I chain IV precursor, Hordeum vulgare, PIR1:F1BH4; supported by cDNA: gi_11692            | 253738_at   | -0.5 |
| putative protein D-threonine dehydrogenase - Pseudomonas cruciviae,PID:d1035162 and to several 3-hydroxyisobutyrate dehydrogenases               | 253706_at   | -0.5 |
| RIBOSOMAL PROTEIN S30 homolog RIBOSOMAL PROTEIN S30 - Arabidopsis thaliana,PID:e1358183                                                          | 253715_at   | -0.5 |
| profilin 2 ; supported by full-length cDNA: Ceres: 25886.                                                                                        | 253727_at   | -0.5 |
| snRNP Sm protein F - like Sm protein F, Homo sapiens, PIR:S55053; supported by full-length cDNA: Ceres: 37087.                                   | 253668_at   | -0.5 |
| Expressed protein ; supported by full-length cDNA: Ceres: 6401.                                                                                  | 253275_at   | -0.5 |
| putative protein ;supported by full-length cDNA: Ceres:8286.                                                                                     | 253072_at   | -0.5 |
| putative phosphatidylinositol synthase phosphatidylinositol synthase (PIS1) - Arabidopsis thaliana, PID:e1313354;supported by full-length c      | 252953_at   | -0.5 |
| H+-transporting ATPase 16K chain P2, vacuolar ;supported by full-length cDNA: Ceres:31833.                                                       | 252926_at   | -0.5 |
| nitrilase 2 ;supported by full-length cDNA: Ceres:40532.                                                                                         | 252678_s_at | -0.5 |
| Expressed protein ; supported by full-length cDNA: Ceres: 122249.                                                                                | 252389_at   | -0.5 |
| 60S RIBOSOMAL PROTEIN - like 60S RIBOSOMAL PROTEIN L26, Brassica rapa, EMBL:BRD495; supported by cDNA: gi_13877790_gb_                           | 252235_at   | -0.5 |
| putative protein                                                                                                                                 | 252155_at   | -0.5 |
| non-specific lipid transfer protein ;supported by full-length cDNA: Ceres:8400.                                                                  | 252115_at   | -0.5 |
| putative protein ;supported by full-length cDNA: Ceres:10009.                                                                                    | 252116_at   | -0.5 |
| putative protein ;supported by full-length cDNA: Ceres:97866.                                                                                    | 252034_at   | -0.5 |
| putative protein predicted proteins, Arabidopsis thaliana                                                                                        | 251951_s_at | -0.5 |
| putative protein Hsp70 binding protein HspBP1 - Homo sapiens, EMBL:AF093420;supported by full-length cDNA: Ceres:37834.                          | 251919_at   | -0.5 |
| tryptophan synthase alpha chain ; supported by full-length cDNA: Ceres: 40110.                                                                   | 251847_at   | -0.5 |
| ribosomal L23a - like protein various ribosomal L23a proteins;supported by full-length cDNA: Ceres:17531.                                        | 251783_at   | -0.5 |
| eukaryotic translation initiation factor 6 (EIF-6) - like protein eukaryotic translation initiation factor 6 (EIF-6), Mus musculus, EMBL:AF04704 | 251776_at   | -0.5 |
| putative protein CHLOROPLAST 30S RIBOSOMAL PROTEIN S20, SWISSPROT:RR20_GUITH; supported by cDNA: gi_15810456_gb_A)                               | 251744_at   | -0.5 |
| hypothetical protein ;supported by full-length cDNA: Ceres:14487.                                                                                | 251624_at   | -0.5 |
| beta-1,3-glucanase 2 (BG2) (PR-2) ;supported by full-length cDNA: Ceres:21719.                                                                   | 251625_at   | -0.5 |
| 3-isopropylmalate dehydratase-like protein (small subunit) 3-isopropylmalate dehydratase, small subunit - Thermotoga maritima, PIR:A723f         | 251524_at   | -0.5 |
| scarecrow - like protein scarecrow-like 6, Arabidopsis thaliana, EMBL:AF036303                                                                   | 251376_at   | -0.5 |
| germin-like protein (GLP10)                                                                                                                      | 251297_at   | -0.5 |
| putative protein                                                                                                                                 | 251240_at   | -0.5 |
| putative protein ER6 protein - Lycopersicon esculentum, EMBL:AF096262; supported by cDNA: gi_14334945_gb_AY035146.1_                             | 251221_at   | -0.5 |
| putative protein glycosyl transferase IgtC - Neisseria gonorrhoeae, EMBL:AF208062                                                                | 251225_at   | -0.5 |
| putative protein putative protein At2g15760 - Arabidopsis thaliana, EMBL:AC006438;supported by full-length cDNA: Ceres:2947.                     | 251183_at   | -0.5 |
| putative protein unknown protein At2g47690 - Arabidopsis thaliana, EMBL:AC005309; supported by full-length cDNA: Ceres: 6853.                    | 251186_at   | -0.5 |
| lectin - like protein lectin precursor LECSJAbmII, Sophora japonica, EMBL:SJU63012;supported by full-length cDNA: Ceres:41306.                   | 251140_at   | -0.5 |
| light-inducible protein ATLS1                                                                                                                    | 251098_at   | -0.5 |
| chlorophyll a/b-binding protein CP29 ; supported by cDNA: gi_15081738_gb_AY048262.1_                                                             | 251082_at   | -0.5 |
| putative protein ;supported by full-length cDNA: Ceres:17471.                                                                                    | 250969_at   | -0.5 |
| unknown protein ; supported by cDNA: gi_15810044_gb_AY054291.1_                                                                                  | 250828_at   | -0.5 |
| putative protein contains similarity to unknown protein (gb AAF23194.1);supported by full-length cDNA: Ceres:5127.                               | 250732_at   | -0.5 |
| putative protein mammalian inositol hexakisphosphate kinase 2 - Homo sapiens, EMBL:AF177145;supported by full-length cDNA: Ceres:3z              | 250607_at   | -0.5 |
| unknown protein ; supported by full-length cDNA: Ceres: 37422.                                                                                   | 250454_at   | -0.5 |
| putative protein various predicted proteins, Arabidopsis thaliana                                                                                | 250435_at   | -0.5 |
| AtAGP4 ; supported by cDNA: gi_13926257_gb_AF372885.1_AF372885                                                                                   | 250437_at   | -0.5 |

|                                                                                                                                               |           |      |
|-----------------------------------------------------------------------------------------------------------------------------------------------|-----------|------|
| nucleoid DNA-binding protein cnd41 - like protein nucleoid DNA-binding protein cnd41, chloroplast, common tobacco, PIR:T01996                 | 250445_at | -0.5 |
| putative protein similar to unknown protein (pir T09909)                                                                                      | 250306_at | -0.5 |
| putative protein similar to unknown protein (pir T09909)                                                                                      | 250307_at | -0.5 |
| putative protein similar to unknown protein (emb CAB87627.1)                                                                                  | 250018_at | -0.5 |
| putative protein predicted protein, Arabidopsis thaliana                                                                                      | 249918_at | -0.5 |
| 60S ribosomal protein L10A ; supported by cDNA: gi_14335147_gb_AY037253.1_                                                                    | 249945_at | -0.5 |
| putative protein similar to unknown protein (emb CAB62459.1);supported by full-length cDNA: Ceres:12030.                                      | 249753_at | -0.5 |
| peroxidase ATP26a                                                                                                                             | 249392_at | -0.5 |
| putative protein                                                                                                                              | 249395_at | -0.5 |
| putative protein similar to unknown protein (pir T28068); supported by full-length cDNA: Ceres: 39514.                                        | 249178_at | -0.5 |
| Rab-type small GTP-binding protein-like ; supported by full-length cDNA: Ceres: 102017.                                                       | 248914_at | -0.5 |
| carnitine/acylcarnitine translocase-like protein ;supported by full-length cDNA: Ceres:13730.                                                 | 248838_at | -0.5 |
| acyl carrier protein-like                                                                                                                     | 248753_at | -0.5 |
| putative protein strong similarity to unknown protein (gb AAF02142.1);supported by full-length cDNA: Ceres:7891.                              | 248663_at | -0.5 |
| peptidyl-prolyl cis-trans isomerase-like protein ;supported by full-length cDNA: Ceres:143222.                                                | 248664_at | -0.5 |
| drought-induced protein Di19-like protein ; supported by cDNA: gi_13937215_gb_AF372963.1_AF372963                                             | 248595_at | -0.5 |
| von Hippel-Lindau binding protein (VHL binding protein; VBP) like ; supported by cDNA: gi_13878182_gb_AF370354.1_AF370354                     | 248589_at | -0.5 |
| acid phosphatase                                                                                                                              | 248440_at | -0.5 |
| trehalose-6-phosphate phosphatase ; supported by cDNA: gi_2944177_gb_AF007778.1_AF007778                                                      | 248404_at | -0.5 |
| putative protein similar to unknown protein (emb CAA71173.1)                                                                                  | 248321_at | -0.5 |
| cytochrome b5 (dbj BAA74839.1) ;supported by full-length cDNA: Ceres:31303.                                                                   | 248217_at | -0.5 |
| vacuolar sorting protein-like; embryogenesis protein H beta 58-like protein ;supported by full-length cDNA: Ceres:41458.                      | 248221_at | -0.5 |
| translation initiation factor-like protein                                                                                                    | 248146_at | -0.5 |
| NOI protein, nitrate-induced                                                                                                                  | 248025_at | -0.5 |
| ADP/ATP translocase-like protein ;supported by full-length cDNA: Ceres:111544.                                                                | 248023_at | -0.5 |
| elongin - like protein elongin C, Drosophila melanogaster, PIR:JC5794; supported by cDNA: gi_15028384_gb_AY045995.1_                          | 247721_at | -0.5 |
| putative protein ;supported by full-length cDNA: Ceres:38797.                                                                                 | 247702_at | -0.5 |
| actin depolymerizing factor 4 - like protein actin depolymerizing factor 4, Arabidopsis thaliana, EMBL:AF102822;supported by full-length cD   | 247656_at | -0.5 |
| putative protein ; supported by full-length cDNA: Ceres: 7022.                                                                                | 247572_at | -0.5 |
| COP1-interacting protein CIP8 ; supported by cDNA: gi_5929905_gb_AF162150.1_AF162150                                                          | 247219_at | -0.5 |
| putative protein contains similarity to protein arginine methyltransferase                                                                    | 247168_at | -0.5 |
| ferredoxin-NADP+ reductase                                                                                                                    | 247131_at | -0.5 |
| putative protein hypothetical proteins - Arabidopsis thaliana;supported by full-length cDNA: Ceres:42528.                                     | 246975_at | -0.5 |
| putative protein apoptosis-related protein PNAS-4, Homo sapiens, EMBL:AF229834;supported by full-length cDNA: Ceres:263500.                   | 246931_at | -0.5 |
| nodulin - like protein early nodulin N93, Glycine max, EMBL:D13506;supported by full-length cDNA: Ceres:21669.                                | 246863_at | -0.5 |
| putative protein ; supported by cDNA: gi_14532675_gb_AY039962.1_                                                                              | 246749_at | -0.5 |
| 60S ribosomal protein - like 60S ribosomal protein L18, Arabidopsis thaliana, SWISSPROT:RL18_ARATH; supported by cDNA: gi_158101!             | 246758_at | -0.5 |
| 40S ribosomal protein S19 - like 40S ribosomal protein S19, Cyanophora paradoxa, EMBL:CPA245654;supported by full-length cDNA: Cer            | 246730_at | -0.5 |
| sugar transporter-like protein putative sugar transporter - Prunus armeniaca, EMBL:AF000952; supported by cDNA: gi_16648752_gb_AY0:           | 246508_at | -0.5 |
| RING-H2 zinc finger protein-like RING-H2 zinc finger protein ATL4 - Arabidopsis thaliana, EMBL:AF132014                                       | 246439_at | -0.5 |
| hypothetical protein ;supported by full-length cDNA: Ceres:96001.                                                                             | 246442_at | -0.5 |
| auxin regulated protein IAA18, putative similar to auxin regulated protein IAA18 GI:2618725 from [Arabidopsis thaliana];supported by full-lei | 246376_at | -0.5 |
| putative protein predicted protein At2g41010 - Arabidopsis thaliana, EMBL:AC004261;supported by full-length cDNA: Ceres:39584.                | 246289_at | -0.5 |
| methionyl aminopeptidase-like protein ;supported by full-length cDNA: Ceres:18909.                                                            | 246202_at | -0.5 |
| hypothetical protein ; supported by cDNA: gi_15028060_gb_AY045887.1_                                                                          | 246205_at | -0.5 |
| Expressed protein ; supported by full-length cDNA: Ceres: 99394.                                                                              | 246159_at | -0.5 |
| putative protein ribosomal protein S8 - Zea mays, PIR:T04088;supported by full-length cDNA: Ceres:29997.                                      | 246068_at | -0.5 |
| Expressed protein ; supported by full-length cDNA: Ceres: 103171.                                                                             | 246018_at | -0.5 |
| putative protein NAC1 - Medicago truncatula, EMBL:AF254124                                                                                    | 245934_at | -0.5 |
| symbiosis-related like protein ;supported by full-length cDNA: Ceres:17851.                                                                   | 245391_at | -0.5 |
| hypothetical protein ;supported by full-length cDNA: Ceres:22637.                                                                             | 245364_at | -0.5 |
| Expressed protein ; supported by full-length cDNA: Ceres: 37809.                                                                              | 245329_at | -0.5 |
| Expressed protein ; supported by full-length cDNA: Ceres: 1297.                                                                               | 245097_at | -0.5 |

|                                                                                                                        |             |      |
|------------------------------------------------------------------------------------------------------------------------|-------------|------|
| putative integral membrane protein ;supported by full-length cDNA: Ceres:25204.                                        | 245083_at   | -0.5 |
| PSI I protein                                                                                                          | 245017_at   | -0.5 |
| hypothetical protein                                                                                                   | 244906_at   | -0.5 |
| hypothetical protein                                                                                                   | 257318_at   | -0.5 |
| hypothetical protein                                                                                                   | 257325_at   | -0.5 |
| hypothetical protein                                                                                                   | 257334_at   | -0.5 |
| unknown protein                                                                                                        | 257407_at   | -0.5 |
| putative RSZp22 splicing factor                                                                                        | 257435_at   | -0.5 |
| hypothetical protein                                                                                                   | 257513_s_at | -0.5 |
| hypothetical protein predicted by genscan+                                                                             | 257061_at   | -0.5 |
| unknown protein ; supported by cDNA: gi_15028228_gb_AY045937.1_                                                        | 267185_at   | -0.5 |
| putative AHP2 similar to GB:BAA36336;supported by full-length cDNA: Ceres:452.                                         | 264838_at   | -0.5 |
| hypothetical protein predicted by genscan; supported by cDNA: gi_15292714_gb_AY050791.1_                               | 259864_at   | -0.5 |
| aminoalcoholphosphotransferase, putative similar to aminoalcoholphosphotransferase GB:AAA67719 from [Glycine max]      | 257933_at   | -0.5 |
| Expressed protein ; supported by full-length cDNA: Ceres: 99521.                                                       | 254362_at   | -0.5 |
| putative protein ; supported by cDNA: gi_15724319_gb_AF412100.1_AF412100                                               | 250929_at   | -0.5 |
| F-box protein family, AtFBX6 contains similarity to unusual floral organs (UFO) GI:4376159 from [Arabidopsis thaliana] | 249140_at   | -0.5 |
| signal peptidase ; supported by cDNA: gi_3044217_gb_AF057144.1_AF057144                                                | 246784_at   | -0.5 |
| proteasome chain protein ; supported by full-length cDNA: Ceres: 24266.                                                | 245315_at   | -0.5 |
| putative nucleotide sugar epimerase                                                                                    | 245133_at   | -0.5 |
